# Supplementary material
Source: Elsevier journal article supplement (https://www.sciencedirect.com/science/article/pii/S2214109X2030022X)
Supplement: mmc1 [file 1-s2.0-S2214109X2030022X-mmc1.pdf]

# THE LANCET

## Global Health

### Supplementary appendix 1

This appendix formed part of the original submission and has been peer reviewed. We post it as supplied by the authors.

Supplement to: Abbas KM, van Zandvoort K, Brisson, Mark Jit M. Effects of updated demography, disability weights, and cervical cancer burden on estimates of human papillomavirus vaccination impact at the global, regional, and national levels: a PRIME modelling study. *Lancet Glob Health* 2020; published online Feb 24. [http://dx.doi.org/10.1016/S2214-109X\(20\)30022-X](http://dx.doi.org/10.1016/S2214-109X(20)30022-X).

## Appendix

### Table of contents

|                                                                                                   |     |
|---------------------------------------------------------------------------------------------------|-----|
| A1. PRIME model and software                                                                      | 2   |
| A2. Disability weights and morbidity attribution                                                  | 3   |
| A3. Comparative scenarios to assess the health impact of HPV vaccination using PRIME              | 5   |
| A4. Cervical cancer burden pre- and post-vaccination of 12-year-old girls at the global level     | 6   |
| A5. Cervical cancer burden pre- and post-vaccination at the global level                          | 7   |
| A6. Cervical cancer burden pre- and post-vaccination at the regional level                        | 15  |
| A7. Cervical cancer burden pre- and post-vaccination at the national level                        | 136 |
| A8. Vaccination impact per 1000 vaccinated girls at the global level                              | 137 |
| A9. Global estimates of HPV vaccination impact of 12-year-old girls                               | 139 |
| A10. Number of 12-year-old girls needed to be vaccinated to prevent cervical cancer               | 140 |
| A11. Vaccination impact per 1000 vaccinated 12-year-old girls at the regional level               | 141 |
| A12. Vaccination impact per 1000 vaccinated 12-year-old girls at the regional level               | 142 |
| A13. Vaccination impact per 1000 vaccinated girls at the regional level                           | 143 |
| A14. HPV vaccination impact of 12-year-old girls at the national level                            | 168 |
| A15. National estimates of HPV vaccination impact for comparative scenarios                       | 170 |
| A16. Vaccination impact per 1000 vaccinated girls at the national level                           | 211 |
| A17. Vaccination impact per 1000 vaccinated girls at the national level – updated PRIME estimates | 212 |
| A18. National estimates of HPV vaccination impact                                                 | 233 |
| A19. Vaccination impact in comparative scenarios                                                  | 240 |



## **A1. PRIME model and software**

The Excel-based version of Papillomavirus Rapid Interface for Modelling and Economics (PRIME) and documentation are accessible online (<http://primetool.org/>) for use by country program managers and planners to facilitate country-specific decision-making in low and middle-income countries.<sup>31</sup> We have also developed an R package (*prime*) which was used to generate the vaccine impact estimates used in this study and is accessible on GitHub (<https://github.com/lshmtm-vimc/prime>). The program for this study analysis is accessible on GitHub ([https://github.com/vaccine-impact/prime\\_update](https://github.com/vaccine-impact/prime_update)) to facilitate reproducibility and reusability.

## A2. Disability weights and morbidity attribution

**Table A2.1. Disability weights and durations for different phases of cervical cancer in GBD 2001 and 2017 studies.**

| Cervical cancer phase/sequela       | Health state description <sup>23</sup>                                                                  | Disability weights                                                                        |                          | Duration |                                                    |
|-------------------------------------|---------------------------------------------------------------------------------------------------------|-------------------------------------------------------------------------------------------|--------------------------|----------|----------------------------------------------------|
|                                     |                                                                                                         | GBD 2001                                                                                  | GBD 2017                 | GBD 2001 | GBD 2017                                           |
| Diagnosis and primary therapy phase | has pain, nausea, fatigue, weight loss and high anxiety                                                 | 0.08                                                                                      | 0.288<br>(0.193 - 0.399) | 1 year   | 4.8 months                                         |
| Controlled phase                    | has a chronic disease that requires medication every day but minimal interference with daily activities | 0.04 (A)<br>0.11 (B)<br>0.13 (C)<br>0.17 (D/E)<br>(A, B, C, D, E - WHO mortality stratum) | 0.049<br>(0.031 - 0.072) | 4 years  | remainder of time after attributing other sequelae |
| Metastatic phase                    | has severe pain, extreme fatigue, weight loss and high anxiety                                          | 0.78                                                                                      | 0.451<br>(0.307 - 0.6)   | 6 months | 9.21 months                                        |
| Terminal phase                      | has lost a lot of weight and regularly uses strong medication to avoid constant pain                    | 0.78                                                                                      | 0.54<br>(0.377 - 0.687)  | 6 months | 1 month                                            |

**Table A2.2. Morbidity attribution**

| Morbidity attribution by age of incidence                                                                                                                  | Morbidity attribution by age of prevalence                                                                                                           |
|------------------------------------------------------------------------------------------------------------------------------------------------------------|------------------------------------------------------------------------------------------------------------------------------------------------------|
| $YLD = I * DW * L$<br>I = incidence (new cases in a given year)<br>DW = disability weight<br>L = average duration of case until remission or death (years) | $YLD = P * DW * L$<br>P = prevalence (in a given year)<br>DW = disability weight<br>L = average duration of case in a given year (maximum of 1 year) |

Incidence, prevalence and mortality for a given age and specific country are defined as follows:

- Incidence at age  $a$  in country  $c$  is the proportion in the specified population who were diagnosed with cervical cancer (at age  $a$ ).
- Prevalence at age  $a$  in country  $c$  is the proportion in the specified population who had been diagnosed with cervical cancer within the last 5 years and are still alive.
- Mortality at age  $a$  in country  $c$  is the proportion in the specified population who died due to cervical cancer.

### Morbidity attribution to the age of incidence

In the Global Burden of Disease (GBD) 2001 study, morbidity (i.e., YLDs - years lived with disability) was attributed to the age of incidence using GBD 2001-specific disability weights and durations for different phases of cervical cancer.

$$YLD_{a,c} = (\text{incidence}_{a,c} - \text{mortality}_{a,c}) * (\text{duration}_{\text{diagnosis phase}} * \text{disability weight}_{\text{diagnosis phase}} + \text{duration}_{\text{control phase}} * \text{disability weight}_{\text{control phase}}) + \text{mortality}_{a,c} * (\text{duration}_{\text{diagnosis phase}} * \text{disability weight}_{\text{diagnosis phase}} + \text{duration}_{\text{metastatic phase}} * \text{disability weight}_{\text{metastatic phase}} + \text{duration}_{\text{terminal phase}} * \text{disability weight}_{\text{terminal phase}})$$

### Morbidity attribution to the age of prevalence

In GBD 2017 study, morbidity was attributed to the age of prevalence using GBD 2017-specific disability weights and durations for different phases of cervical cancer.

$$YLD_{a,c} = \text{incidence}_{a,c} * (\text{duration}_{\text{diagnosis phase}} * \text{disability weight}_{\text{diagnosis phase}}) + \text{prevalence}_{a,c} * (\text{disability weight}_{\text{control phase}}) + \text{mortality}_{a,c} * (\text{duration}_{\text{metastatic phase}} * \text{disability weight}_{\text{metastatic phase}} + \text{duration}_{\text{terminal phase}} * \text{disability weight}_{\text{terminal phase}})$$

### A3. Comparative scenarios to assess the health impact of HPV vaccination using PRIME

| <b>Scenario</b> | <b>Demography</b> | <b>Disability weights</b> | <b>Cervical cancer burden</b> |
|-----------------|-------------------|---------------------------|-------------------------------|
| s1              | WHO (2009)        | GBD 2001                  | GLOBOCAN 2012                 |
| s2              | UNWPP (2019)      | GBD 2001                  | GLOBOCAN 2012                 |
| s3              | WHO (2009)        | GBD 2017                  | GLOBOCAN 2012                 |
| s4              | WHO (2009)        | GBD 2001                  | GLOBOCAN 2018                 |
| s5              | UNWPP (2019)      | GBD 2017                  | GLOBOCAN 2018                 |

#### A4. Cervical cancer burden pre- and post-vaccination of 12-year-old girls at the global level

Lifetime cervical cancer burden in terms of cases, deaths and DALYs pre and post bivalent/quadrivalent and nonavalent HPV vaccination of 12-year-old girls at 90% coverage in 177 countries during 2020-2029, which relates to birth cohorts of 2008-2017 (estimates after the combined PRIME updates for demography, disability weights and cervical cancer burden).

Lifetime burden of cervical cancer (cases, deaths, DALYs) pre- and post-vaccination (HPV vaccination of 12-year-old girls at 90% coverage)

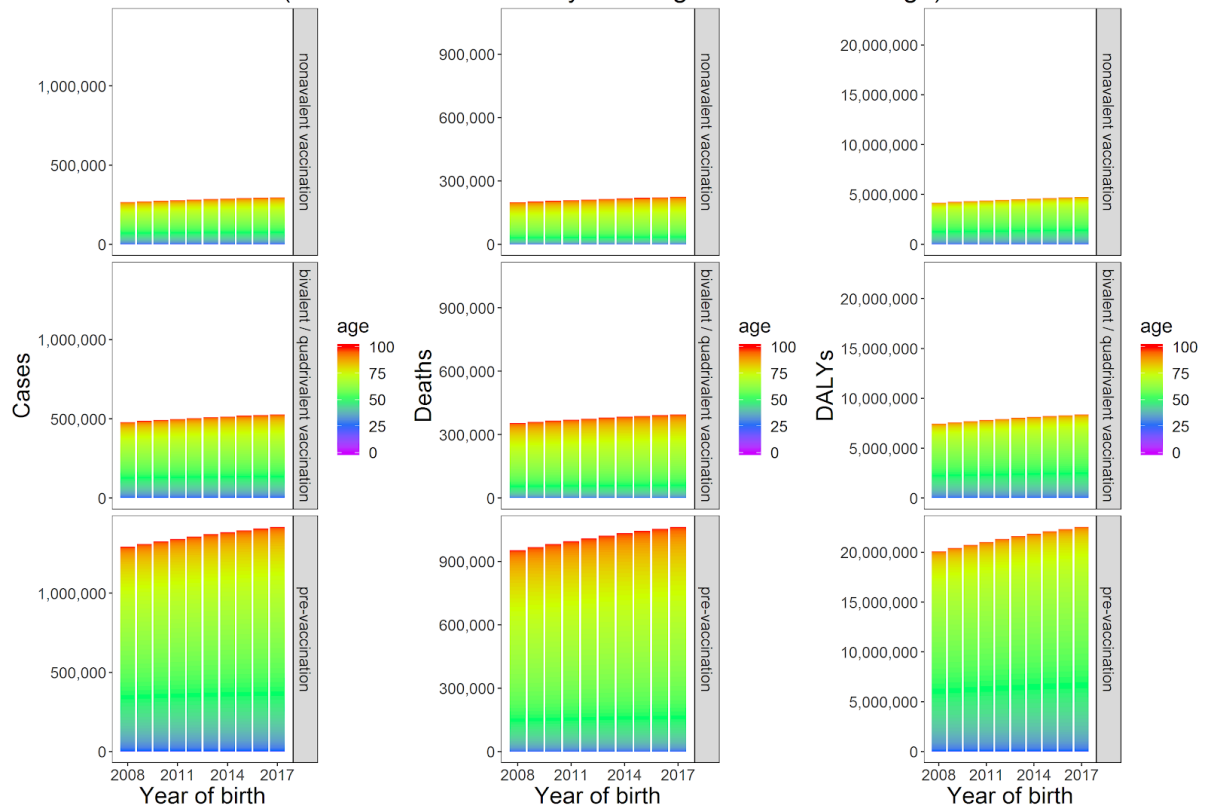

## A5. Cervical cancer burden pre- and post-vaccination at the global level

The lifetime burden of cervical cancer caused by HPV 16/18 and HPV 16/18/31/33/45/52/58 in terms of cases, deaths, YLDs, YLLs and DALYs pre- and post-vaccination at 90% coverage during 2020-2029 in 177 countries for bivalent/quadrivalent and nonavalent vaccination of 9-year-old and 12-year-old girls. The bivalent/quadrivalent vaccine protects against cervical cancers caused by HPV 16/18 while the nonavalent vaccine protects against cervical cancers caused by HPV 16/18/31/33/45/52/58.

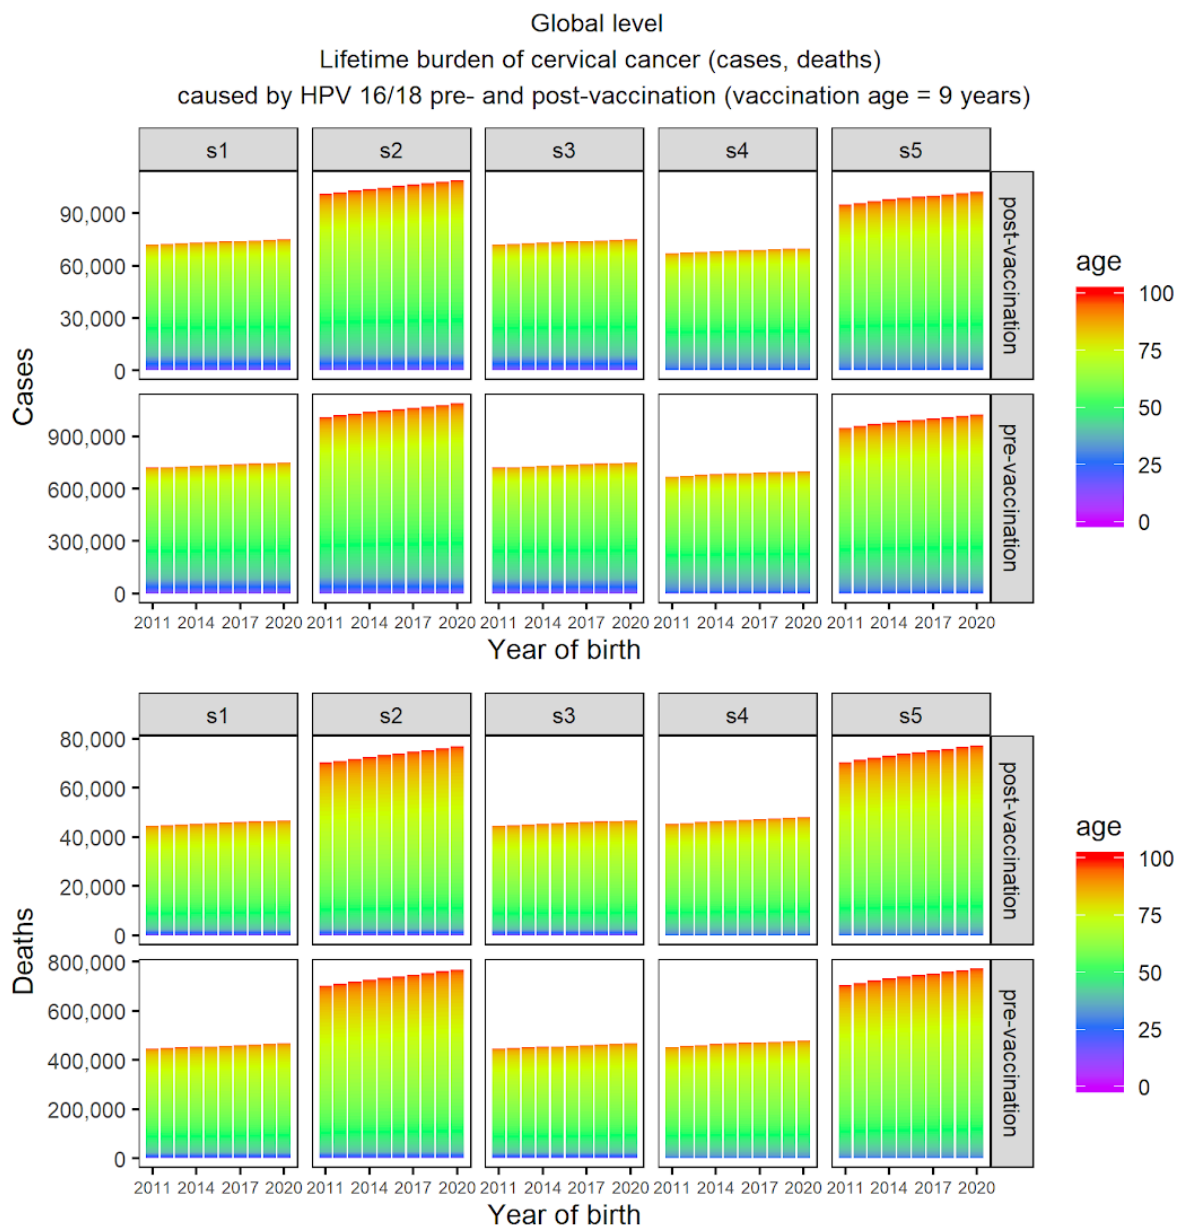

- s1 - WHO 2009 demography, GBD 2001 disability weights, GLOBOCAN 2012 cervical cancer burden
- s2 - UNWPP 2019 demography, GBD 2001 disability weights, GLOBOCAN 2012 cervical cancer burden
- s3 - WHO 2009 demography, GBD 2017 disability weights, GLOBOCAN 2012 cervical cancer burden
- s4 - WHO 2009 demography, GBD 2001 disability weights, GLOBOCAN 2018 cervical cancer burden
- s5 - UNWPP 2019 demography, GBD 2017 disability weights, GLOBOCAN 2018 cervical cancer burden

Global level  
 Lifetime burden of cervical cancer (YLDs, YLLs, DALYs)  
 caused by HPV 16/18 pre- and post-vaccination (vaccination age = 9 years)

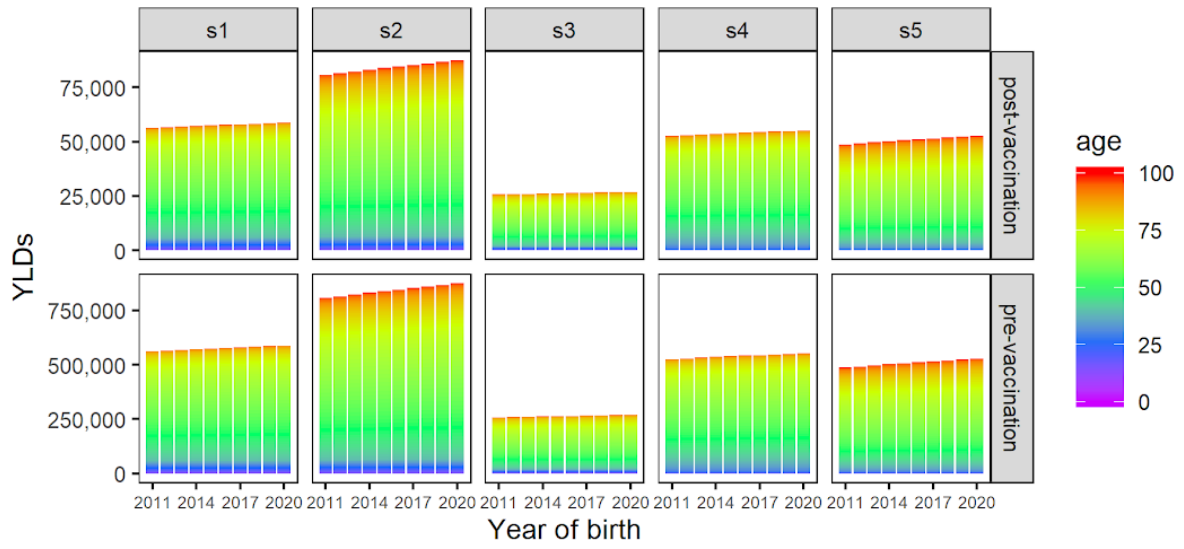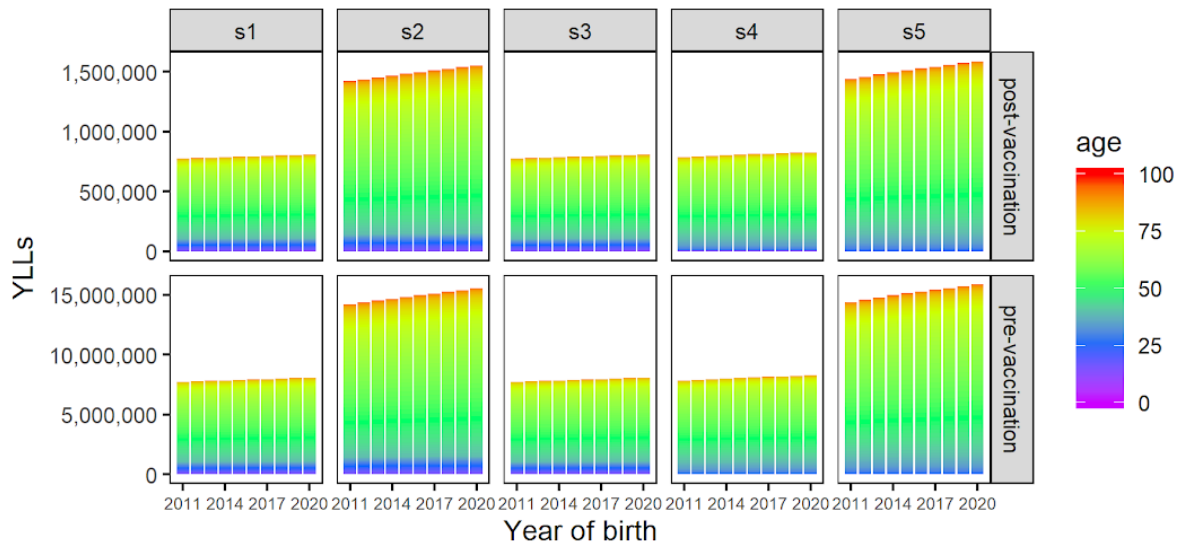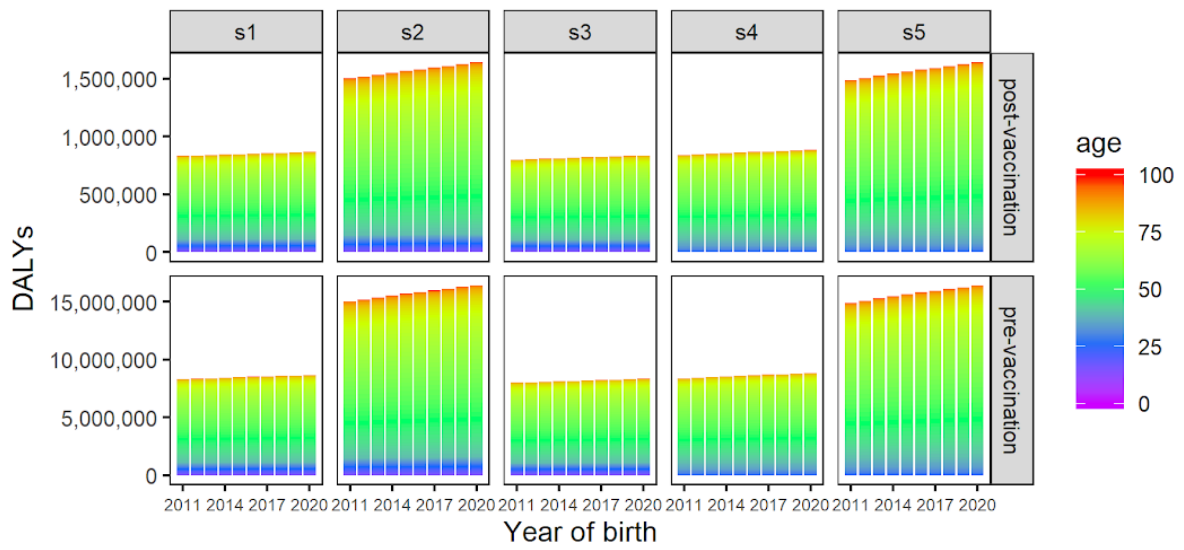

Global level  
 Lifetime burden of cervical cancer (cases, deaths)  
 caused by HPV 16/18/31/33/45/52/58 pre- and post-vaccination (vaccination age = 9 years)

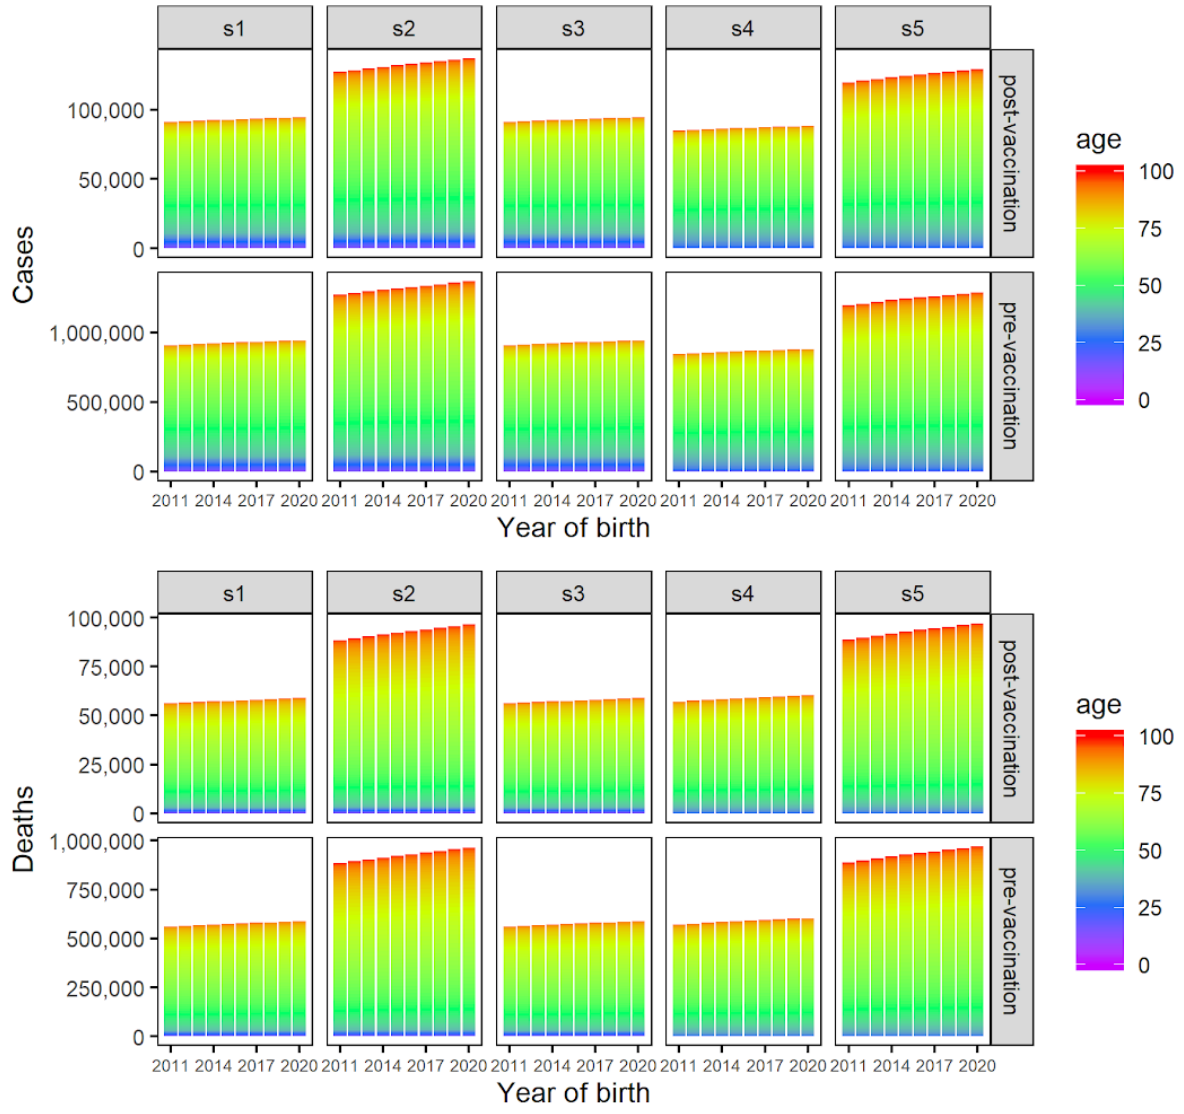



Global level  
 Lifetime burden of cervical cancer (YLDs, YLLs, DALYs)  
 caused by HPV 16/18/31/33/45/52/58 pre- and post-vaccination (vaccination age = 9 years)

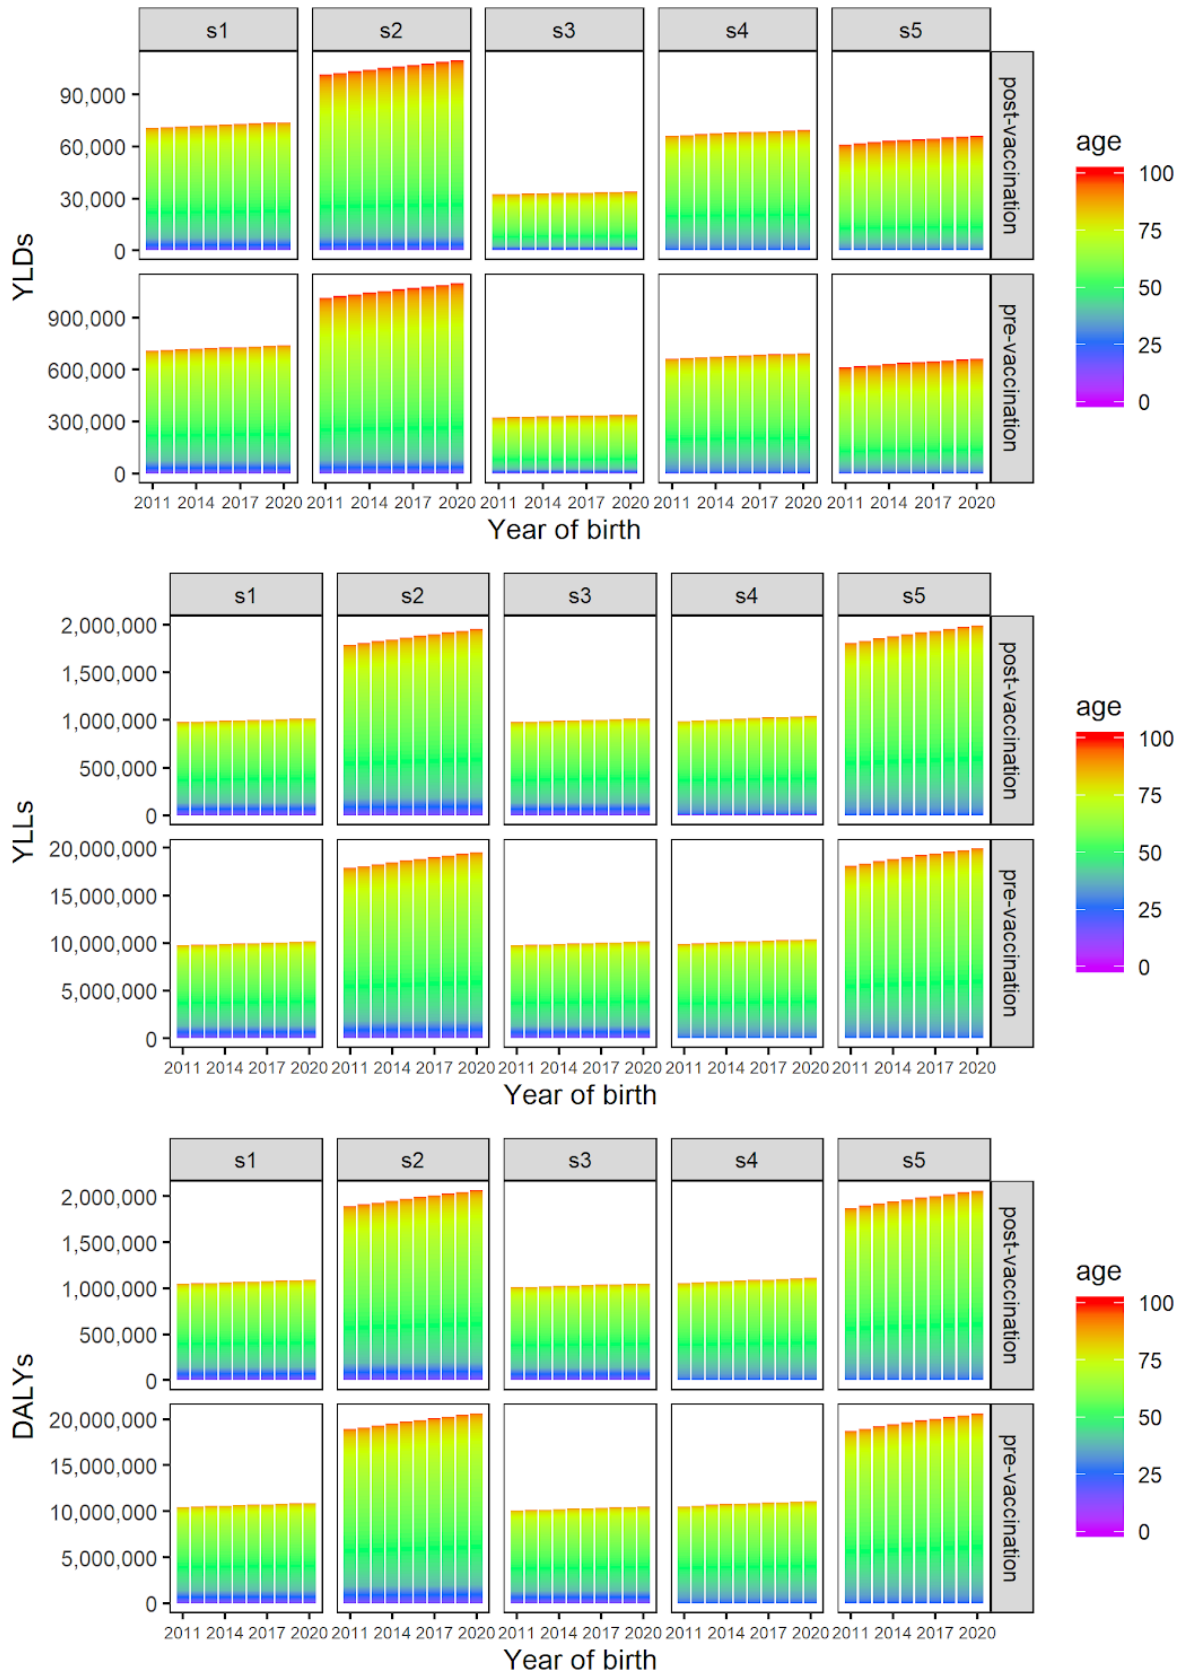

Global level  
 Lifetime burden of cervical cancer (cases, deaths)  
 caused by HPV 16/18 pre- and post-vaccination (vaccination age = 12 years)

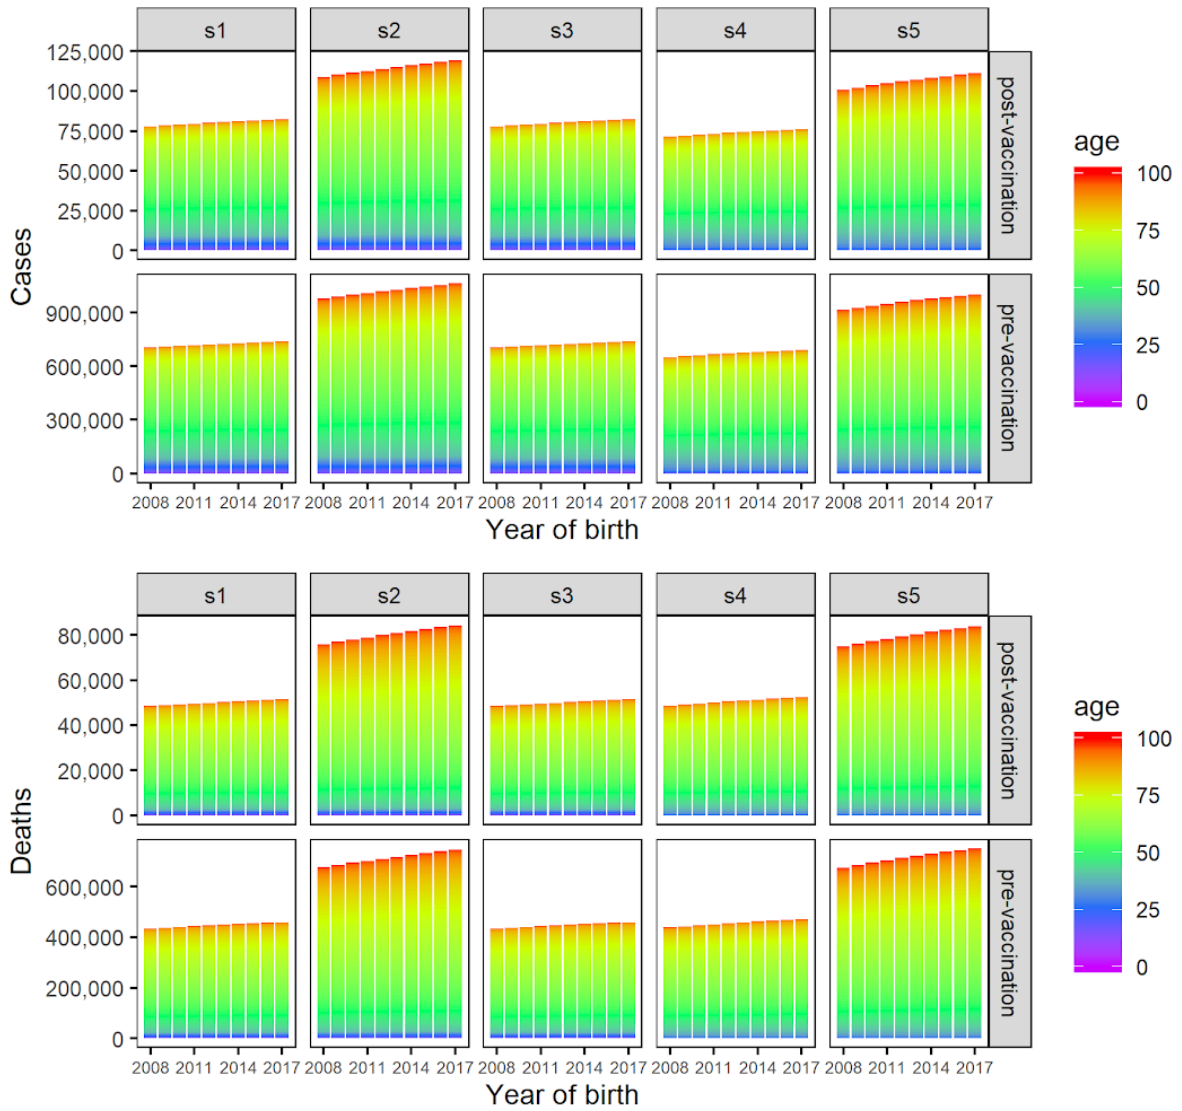

Global level  
 Lifetime burden of cervical cancer (YLDs, YLLs, DALYs)  
 caused by HPV 16/18 pre- and post-vaccination (vaccination age = 12 years)

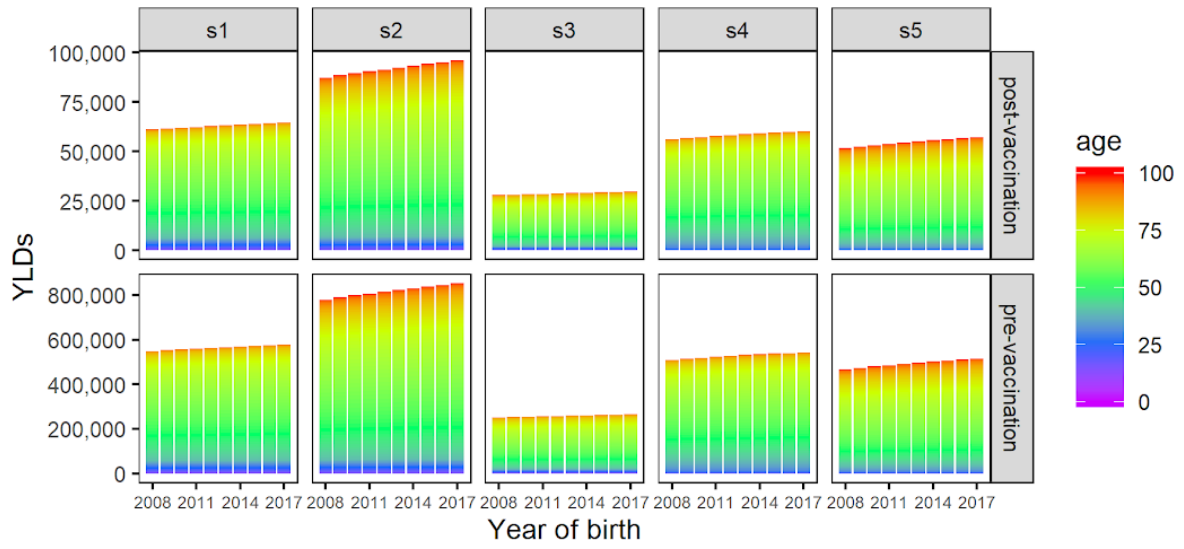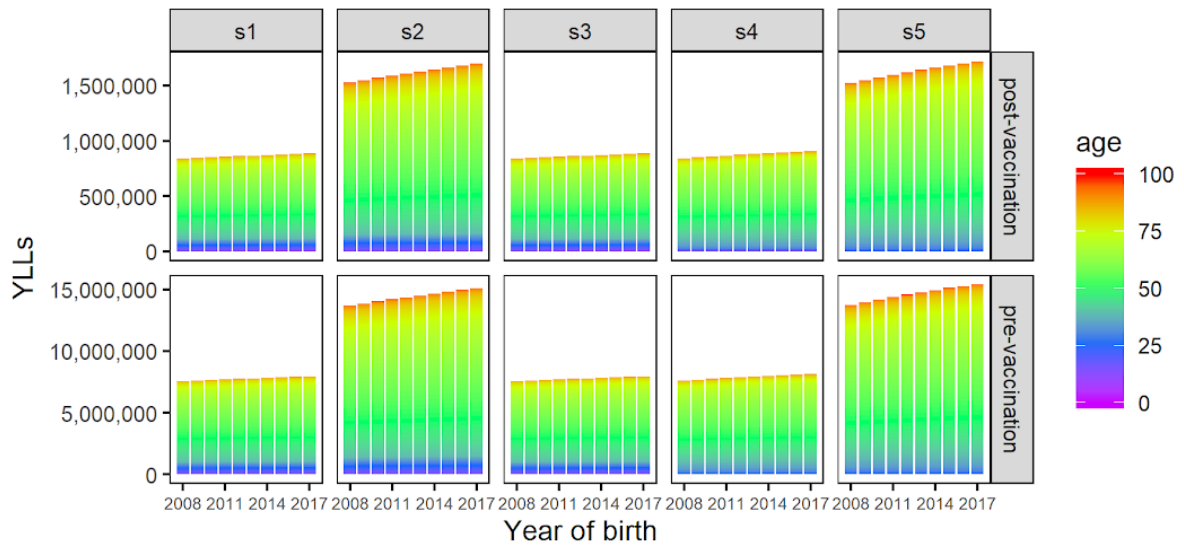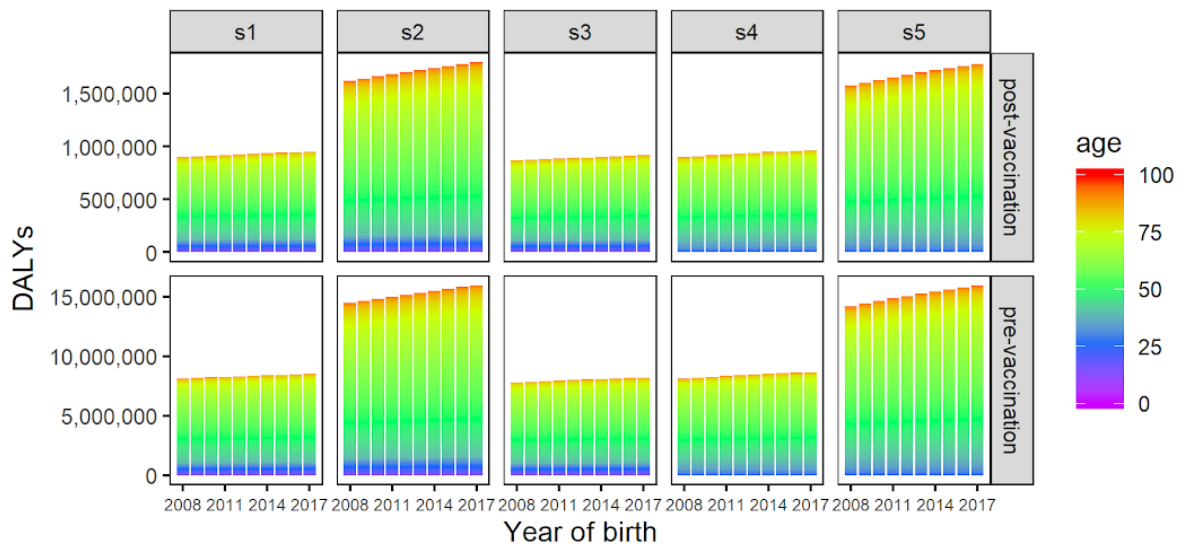

Global level  
 Lifetime burden of cervical cancer (cases, deaths)  
 caused by HPV 16/18/31/33/45/52/58 pre- and post-vaccination (vaccination age = 12 years)

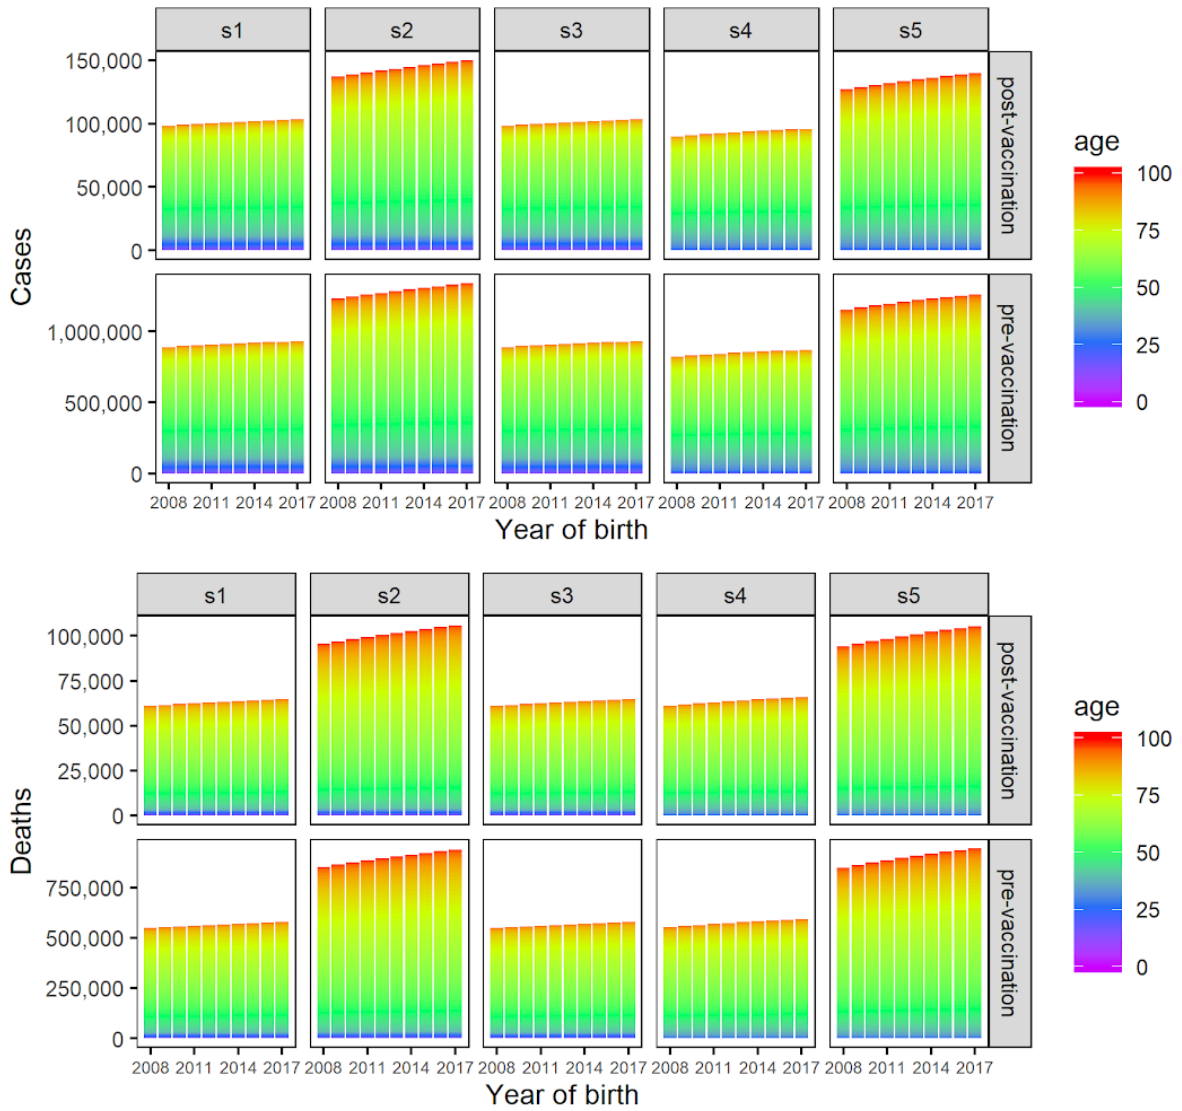

Global level  
 Lifetime burden of cervical cancer (YLDs, YLLs, DALYs)  
 caused by HPV 16/18/31/33/45/52/58 pre- and post-vaccination (vaccination age = 12 years)

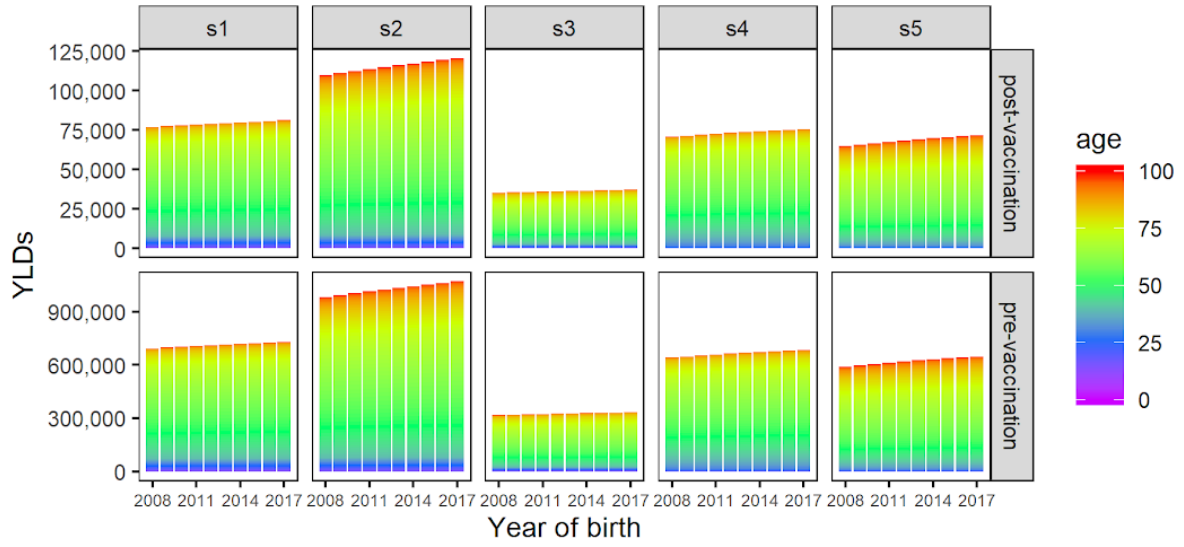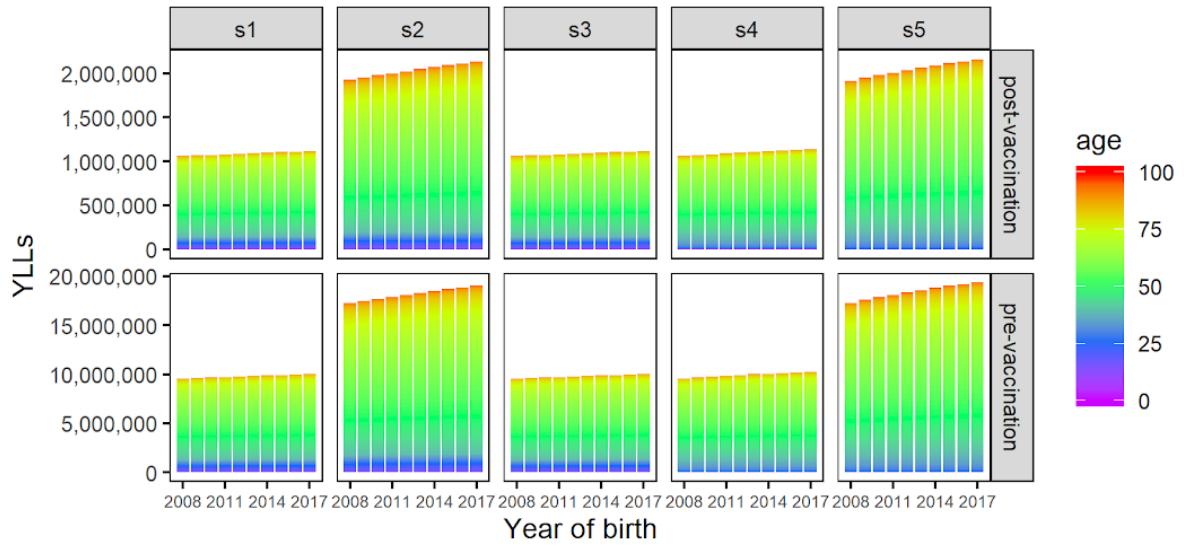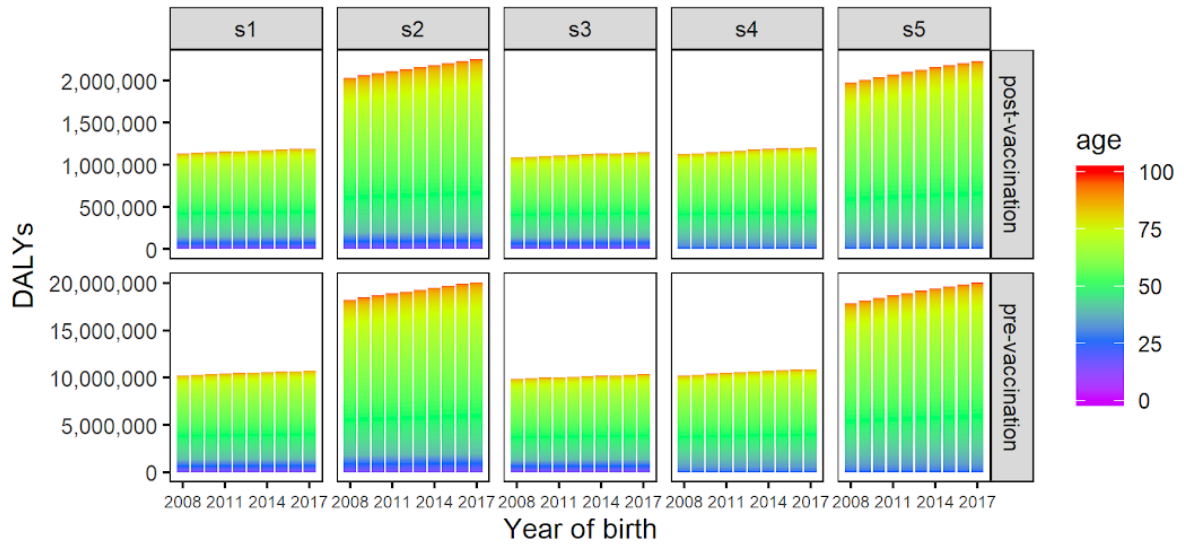

#### **A6. Cervical cancer burden pre- and post-vaccination at the regional level**

The lifetime burden of cervical cancer caused by HPV 16/18 and HPV 16/18/31/33/45/52/58 in terms of cases, deaths, YLDs, YLLs and DALYs pre- and post-vaccination at 90% coverage during 2020-2029 in the 6 WHO regions for bivalent/quadrivalent and nonavalent vaccination of 9-year-old and 12-year-old girls.

Eastern Mediterranean Region  
 Lifetime burden of cervical cancer Cases  
 caused by HPV 16/18 pre- and post-vaccination  
 (vaccination age = 9 years / bivalent/quadrivalent vaccine)

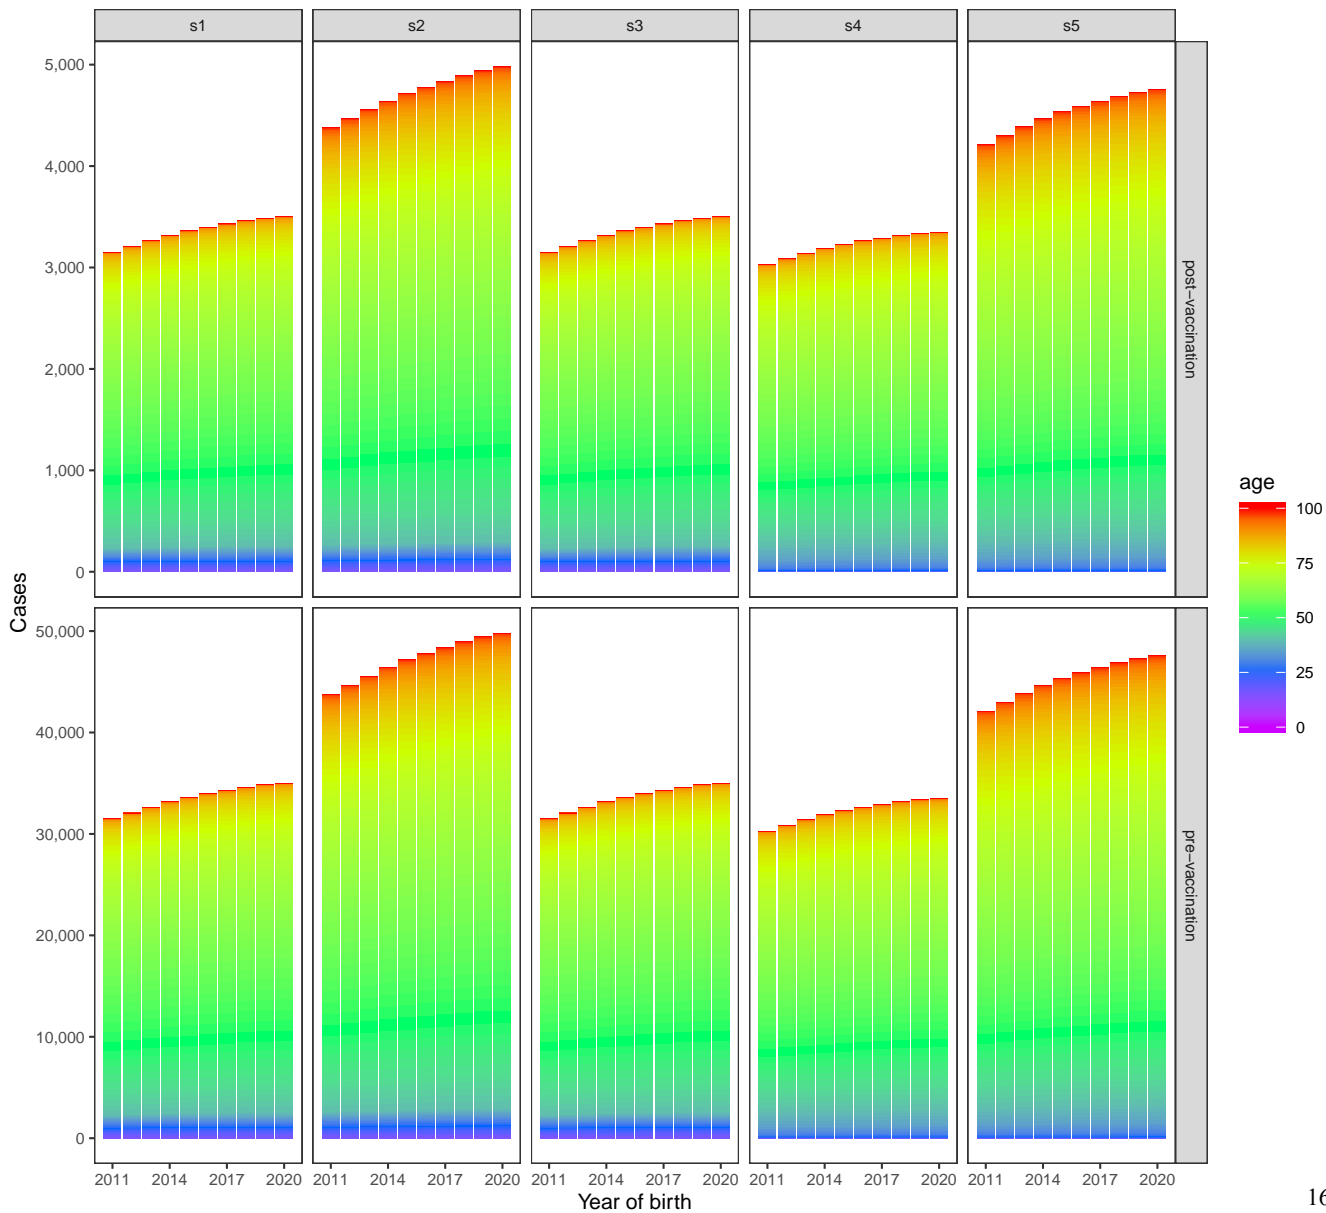

Eastern Mediterranean Region  
 Lifetime burden of cervical cancer Deaths  
 caused by HPV 16/18 pre- and post-vaccination  
 (vaccination age = 9 years / bivalent/quadrivalent vaccine)

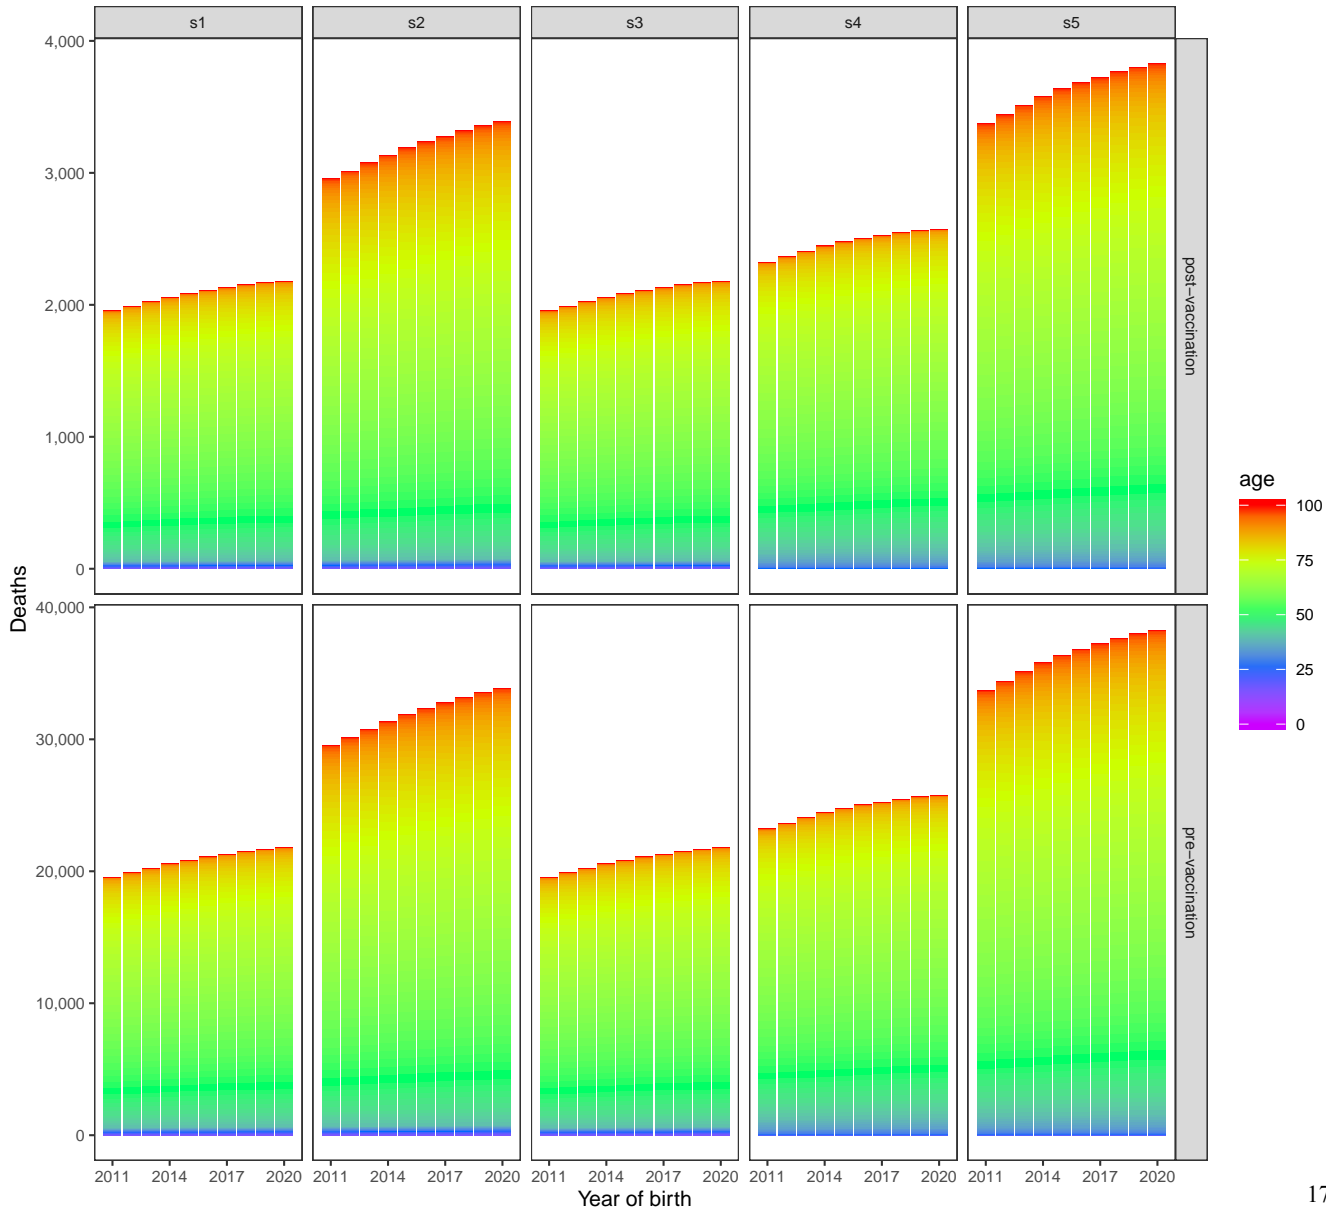



Eastern Mediterranean Region  
 Lifetime burden of cervical cancer YLDs  
 caused by HPV 16/18 pre- and post-vaccination  
 (vaccination age = 9 years / bivalent/quadrivalent vaccine)

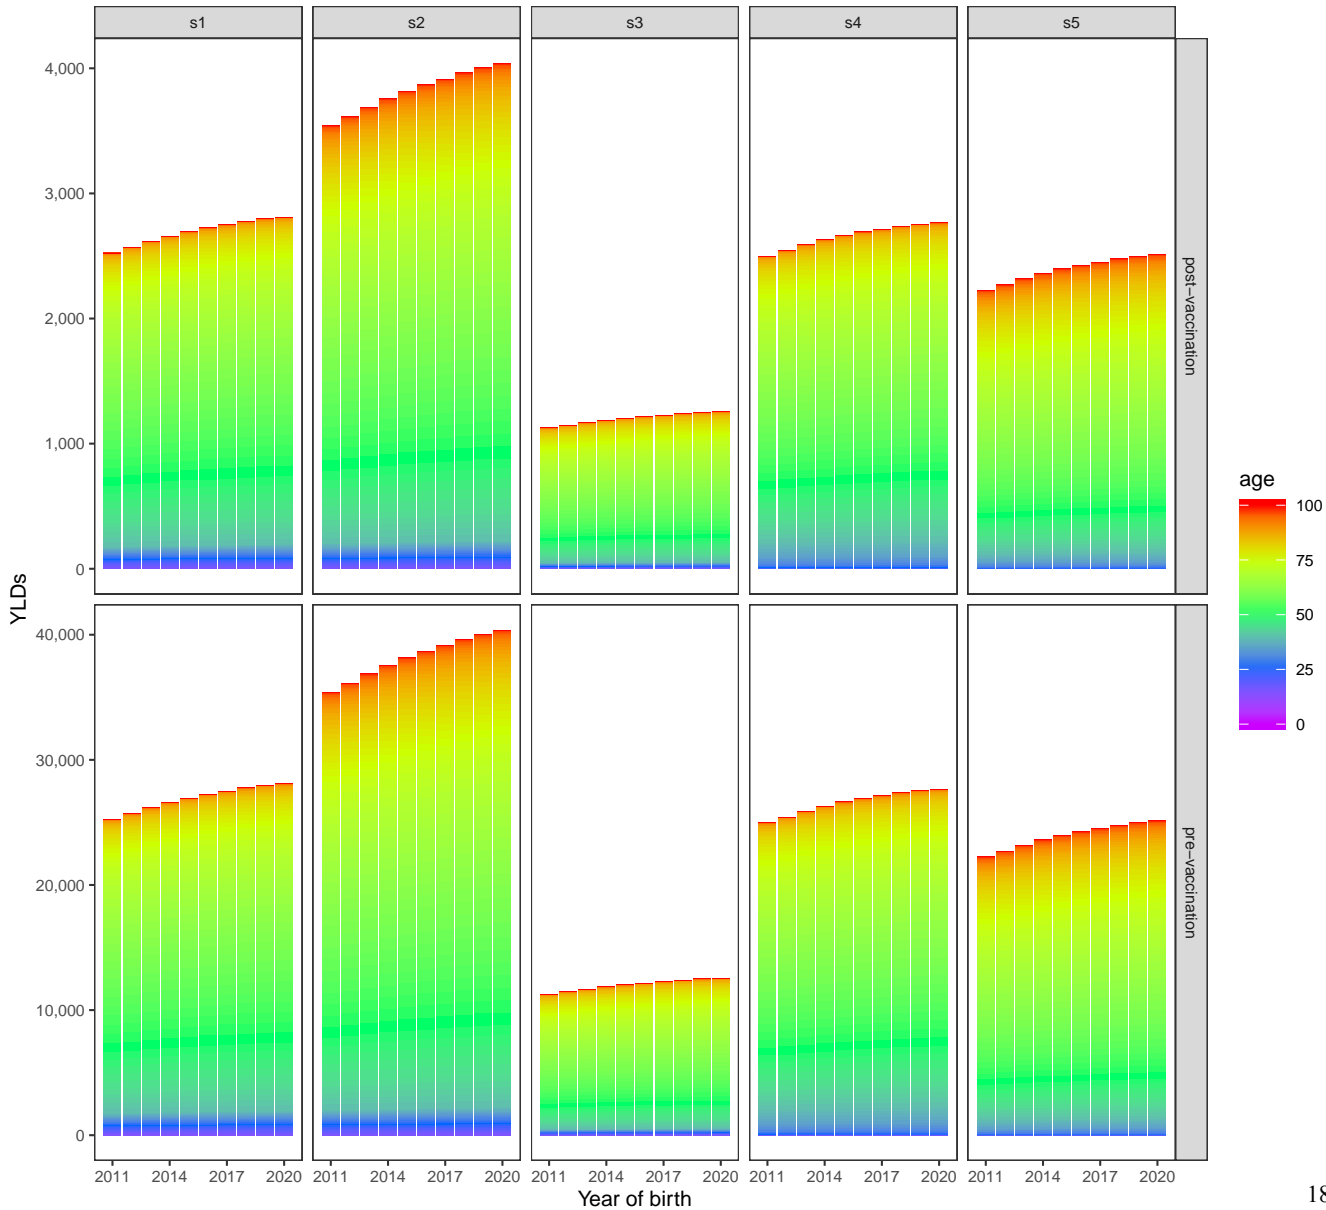

Eastern Mediterranean Region  
 Lifetime burden of cervical cancer YLLs  
 caused by HPV 16/18 pre- and post-vaccination  
 (vaccination age = 9 years / bivalent/quadrivalent vaccine)

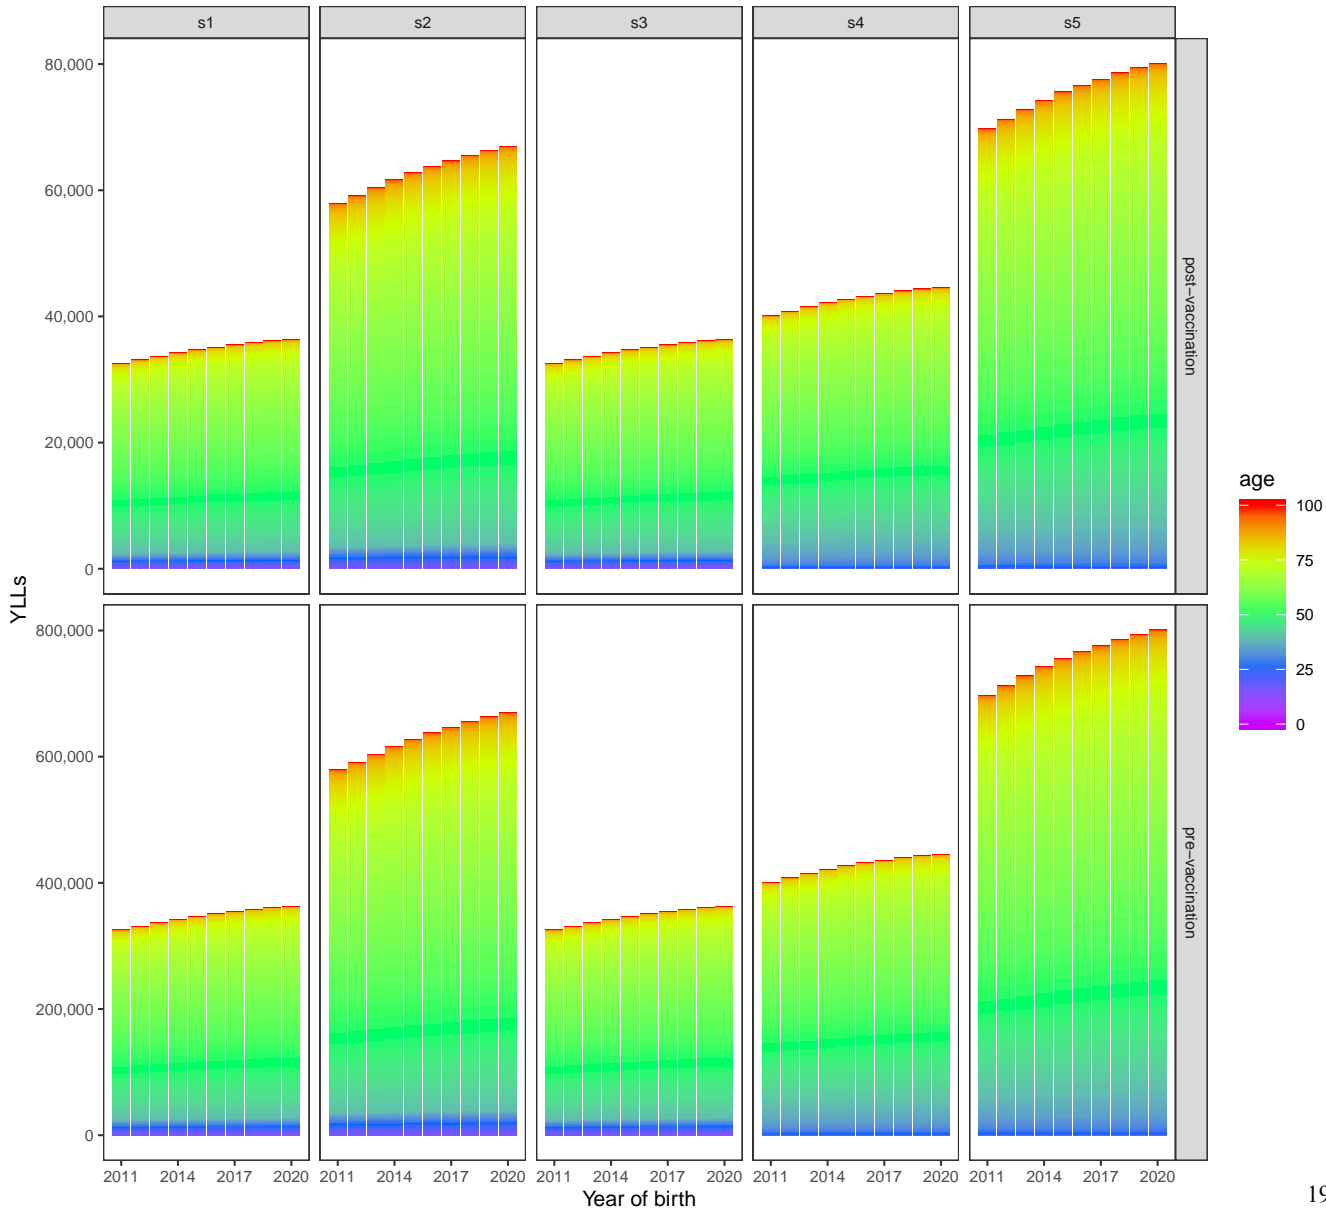

Eastern Mediterranean Region  
 Lifetime burden of cervical cancer DALYs  
 caused by HPV 16/18 pre- and post-vaccination  
 (vaccination age = 9 years / bivalent/quadrivalent vaccine)

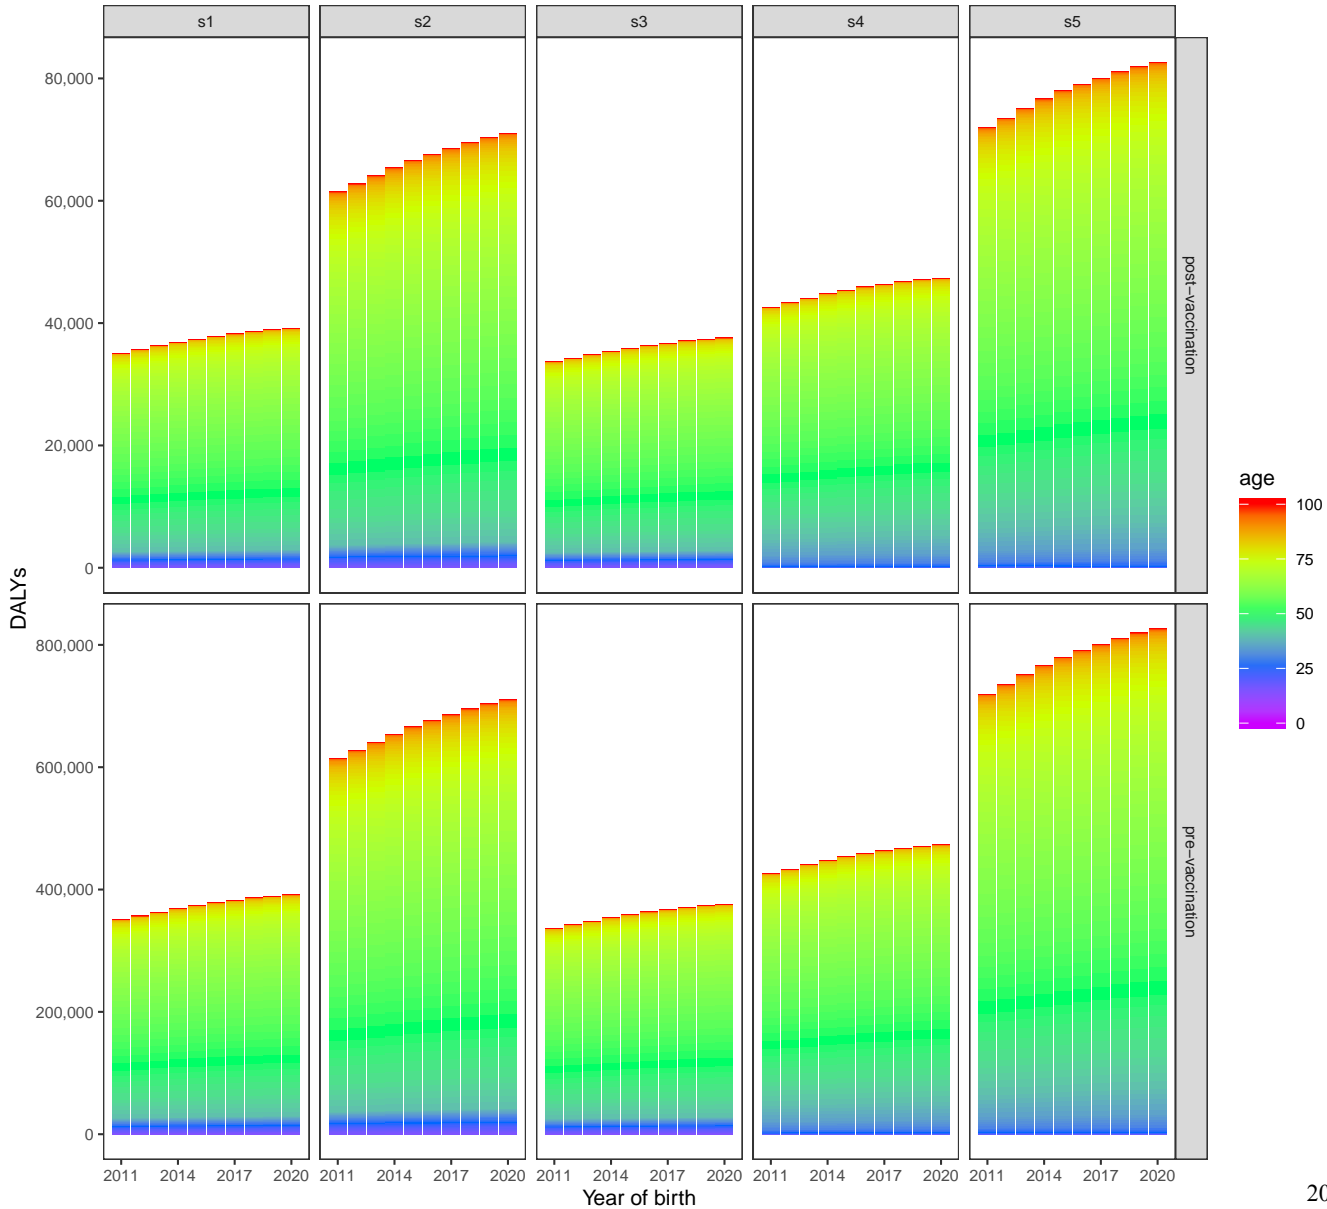

African Region  
 Lifetime burden of cervical cancer Cases  
 caused by HPV 16/18 pre- and post-vaccination  
 (vaccination age = 9 years / bivalent/quadrivalent vaccine)

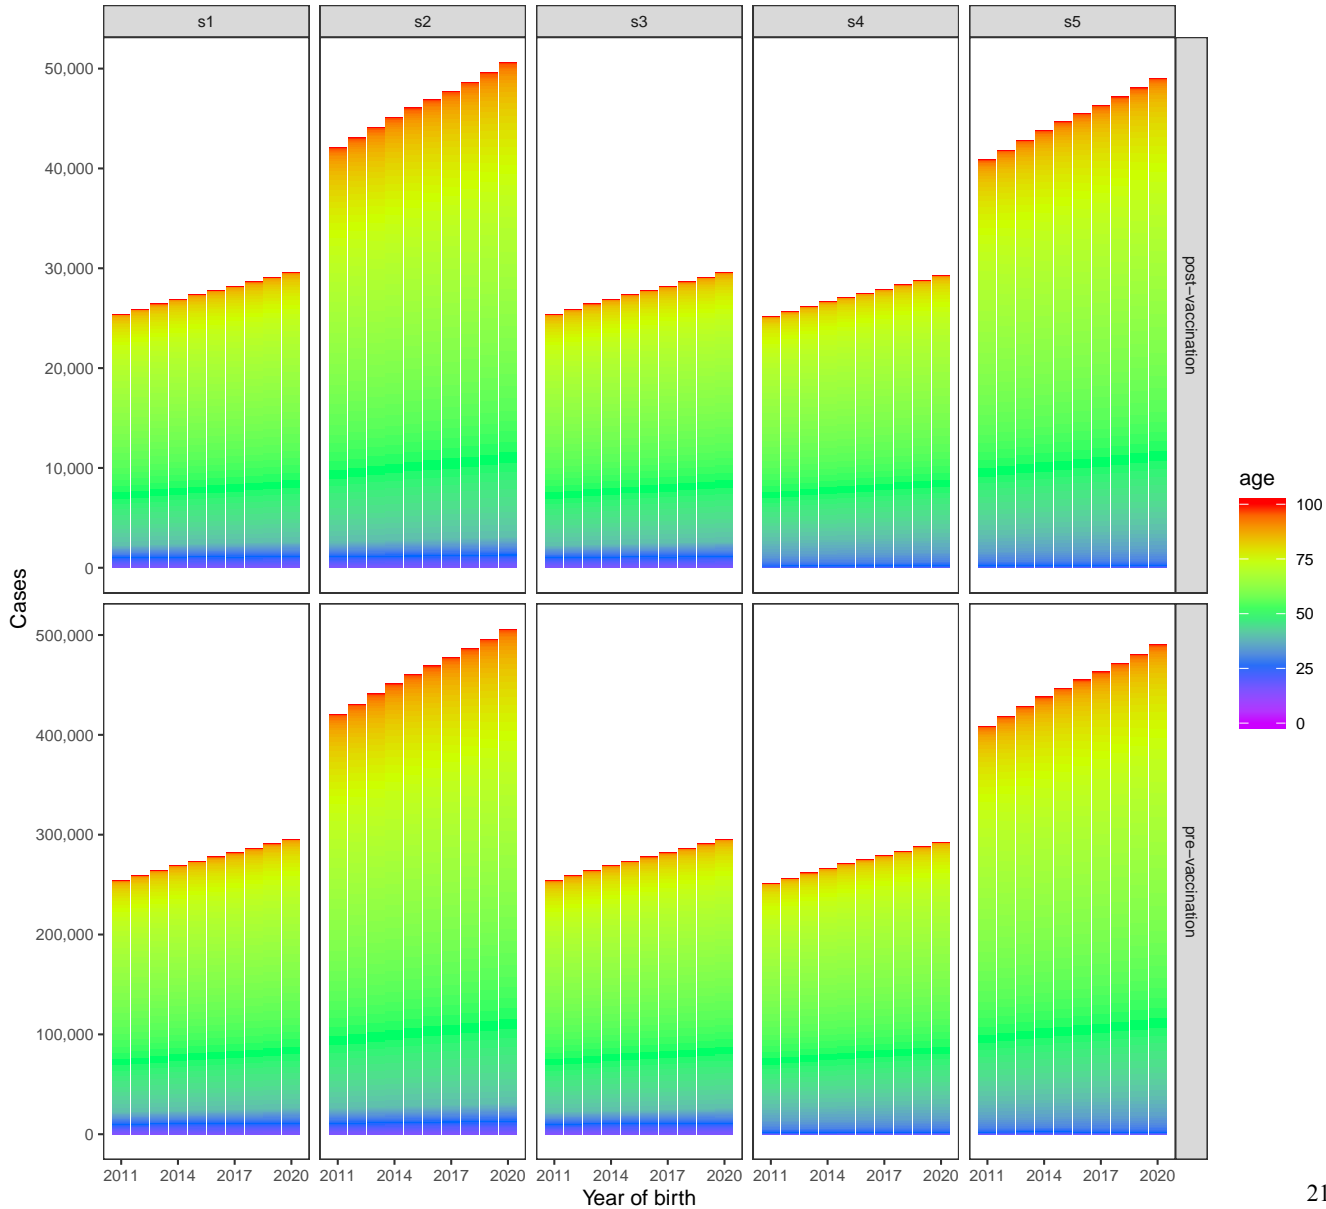

African Region  
 Lifetime burden of cervical cancer Deaths  
 caused by HPV 16/18 pre- and post-vaccination  
 (vaccination age = 9 years / bivalent/quadrivalent vaccine)

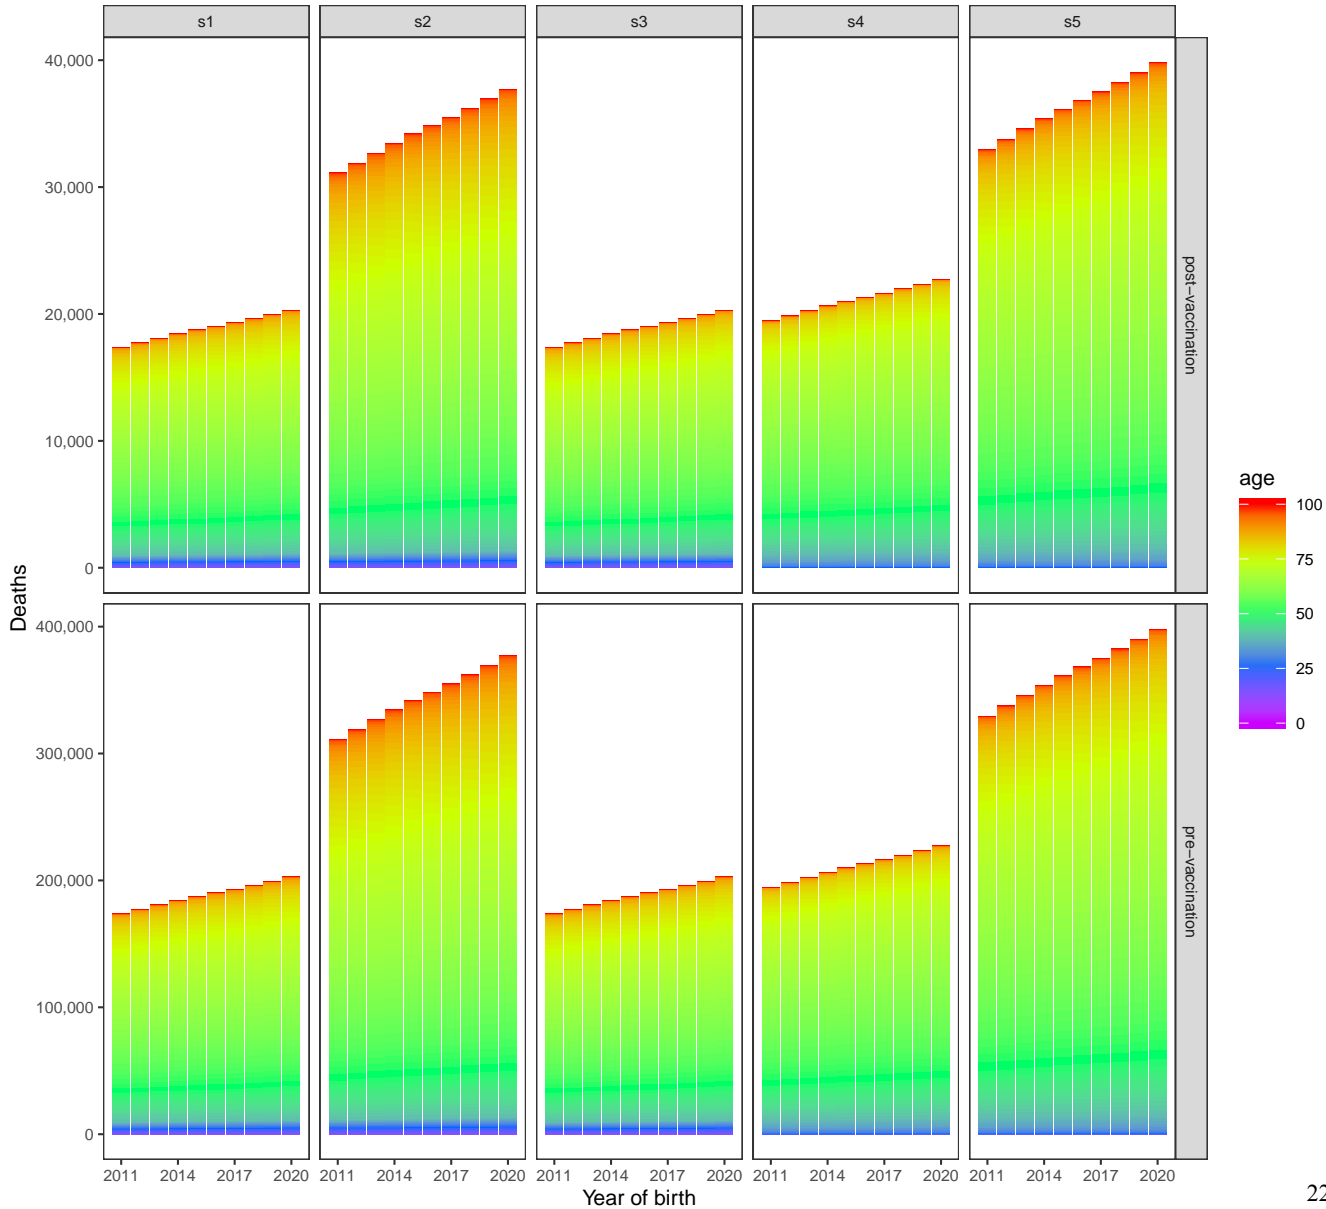

African Region  
 Lifetime burden of cervical cancer YLDs  
 caused by HPV 16/18 pre- and post-vaccination  
 (vaccination age = 9 years / bivalent/quadrivalent vaccine)

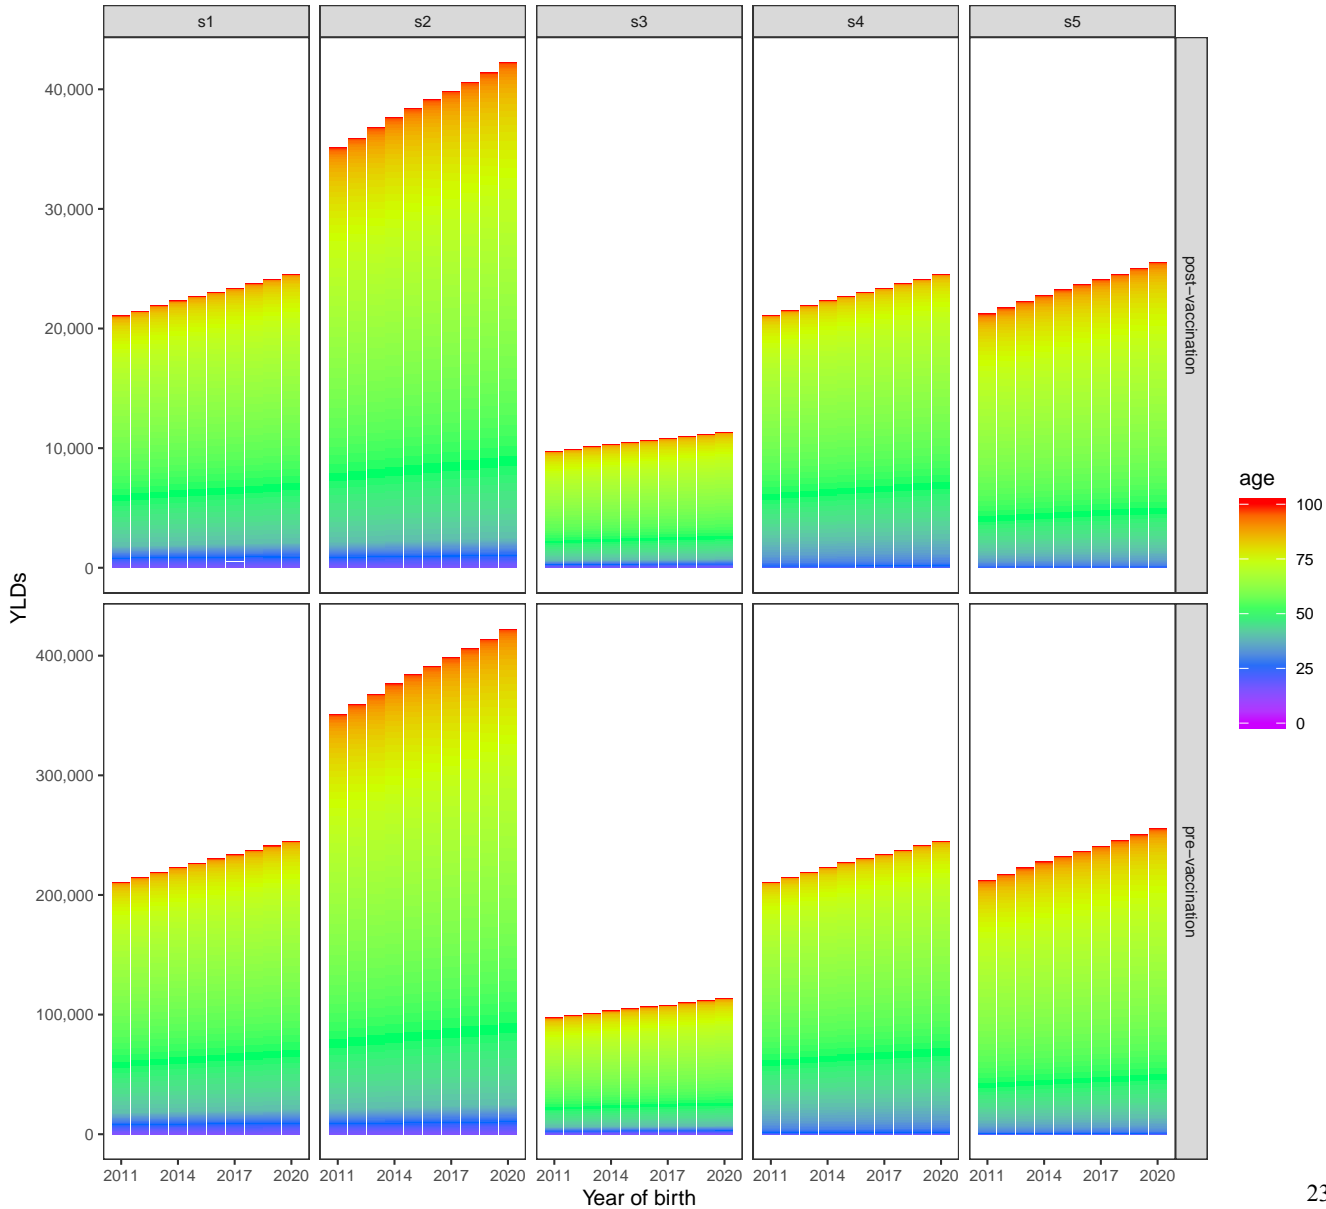

African Region  
 Lifetime burden of cervical cancer YLLs  
 caused by HPV 16/18 pre- and post-vaccination  
 (vaccination age = 9 years / bivalent/quadrivalent vaccine)

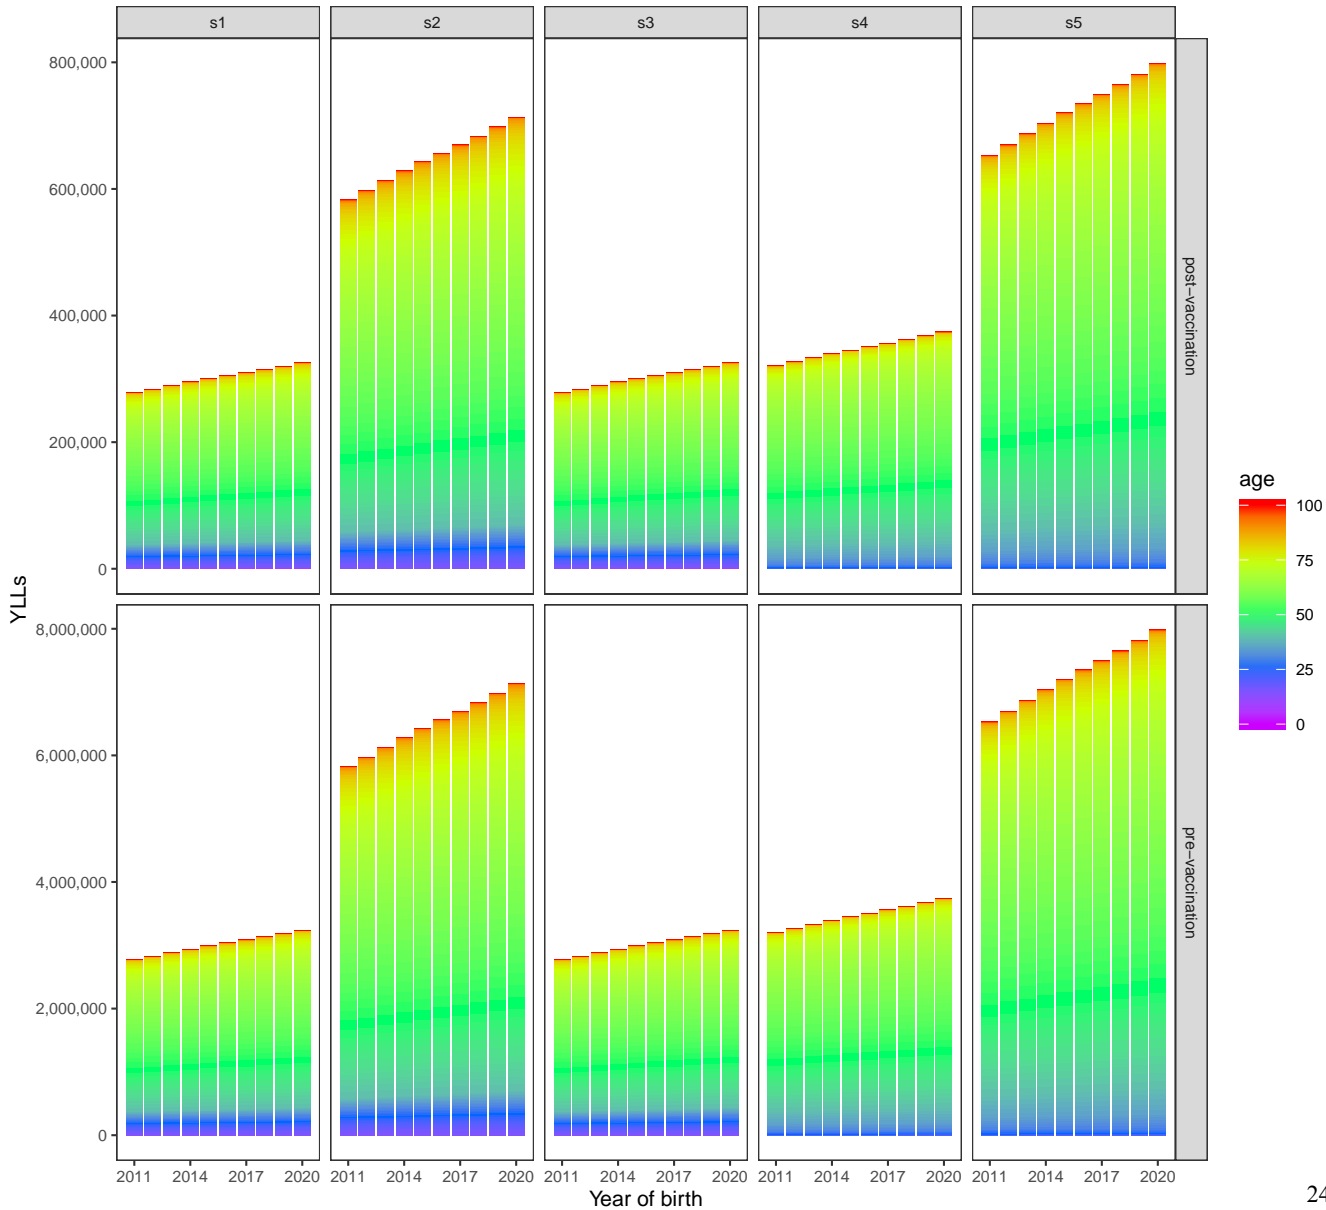

African Region  
 Lifetime burden of cervical cancer DALYs  
 caused by HPV 16/18 pre- and post-vaccination  
 (vaccination age = 9 years / bivalent/quadrivalent vaccine)

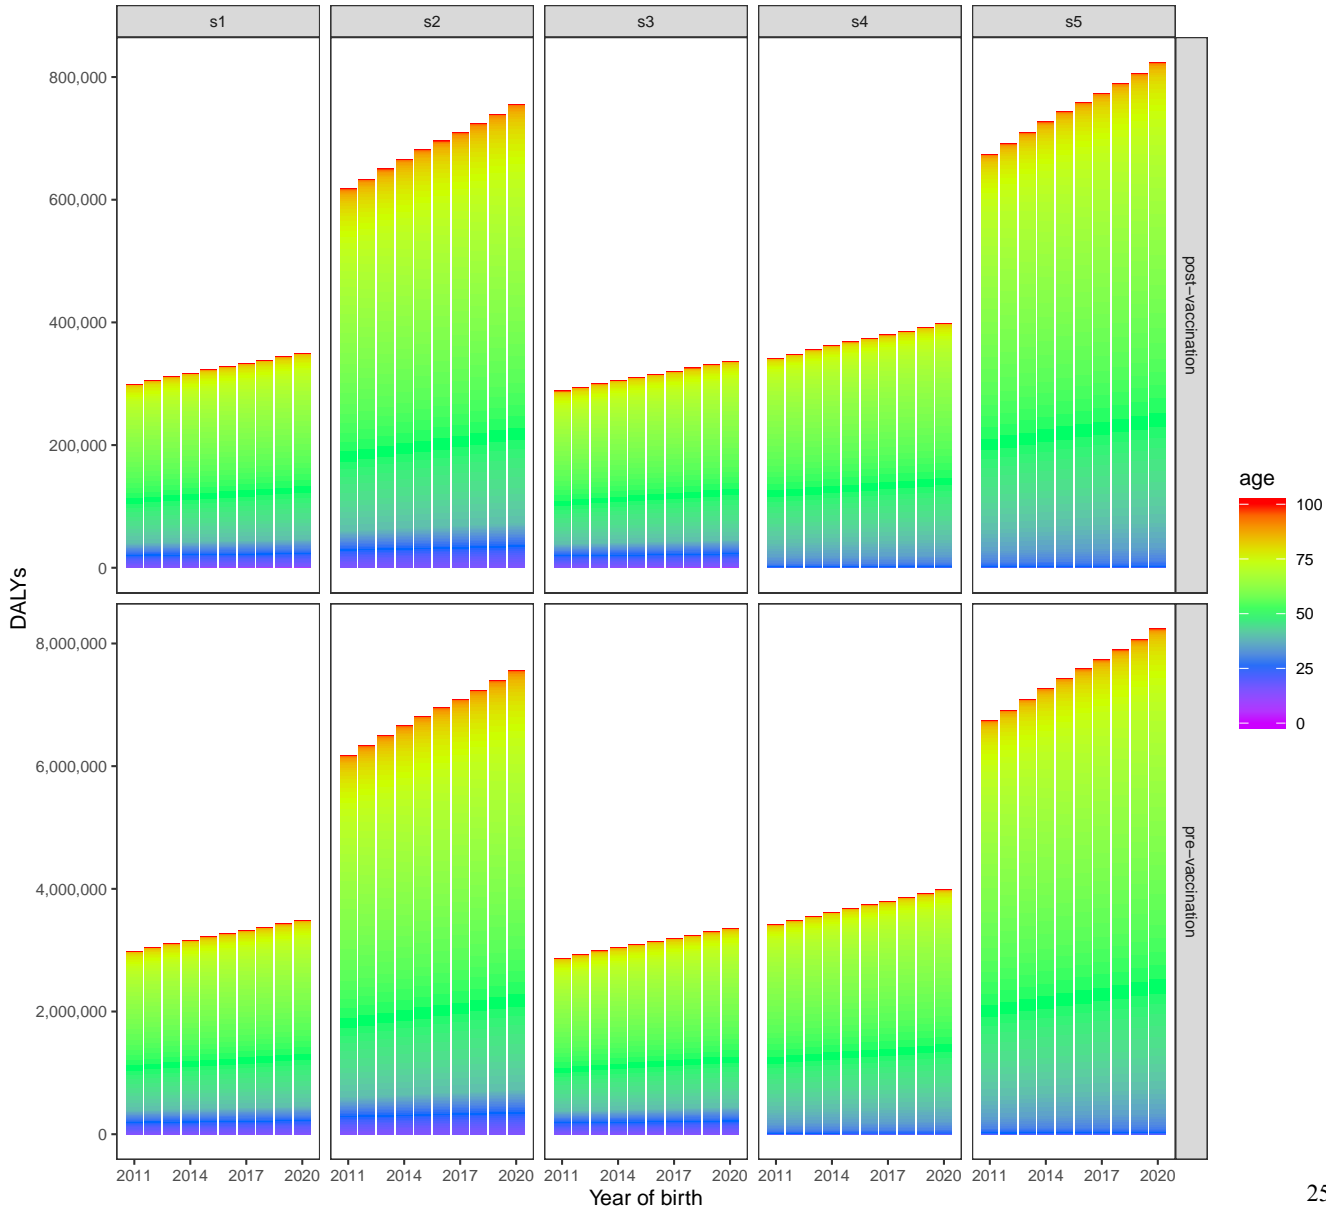



European Region  
 Lifetime burden of cervical cancer Cases  
 caused by HPV 16/18 pre- and post-vaccination  
 (vaccination age = 9 years / bivalent/quadrivalent vaccine)

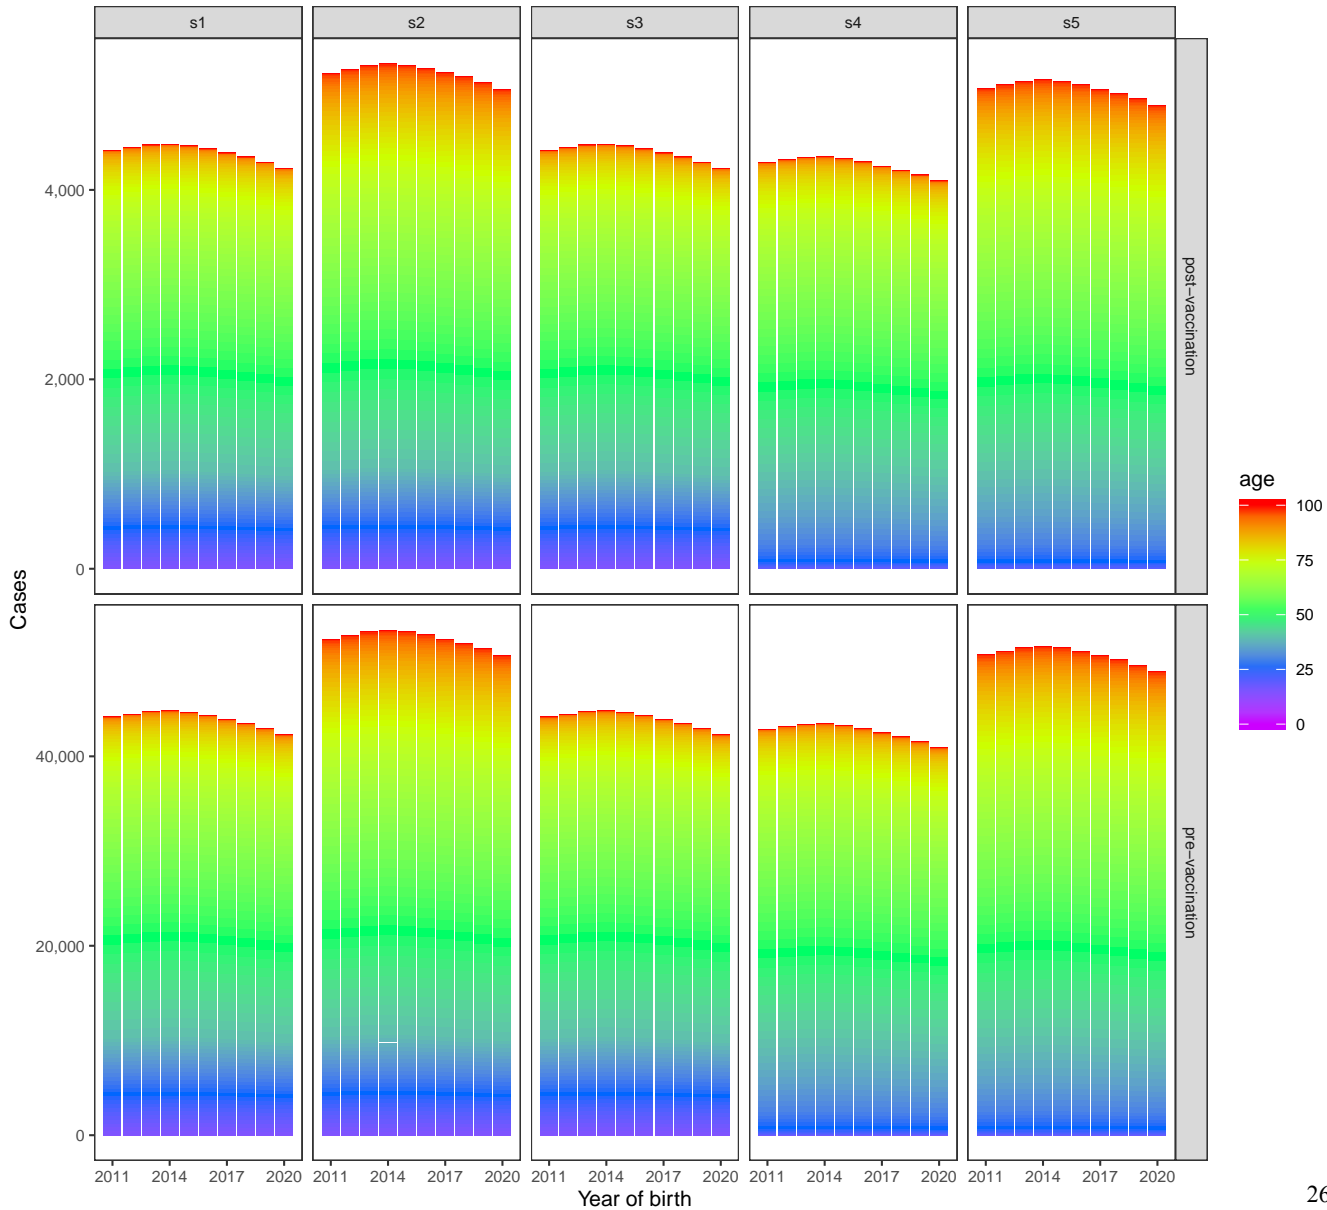

European Region  
 Lifetime burden of cervical cancer Deaths  
 caused by HPV 16/18 pre- and post-vaccination  
 (vaccination age = 9 years / bivalent/quadrivalent vaccine)

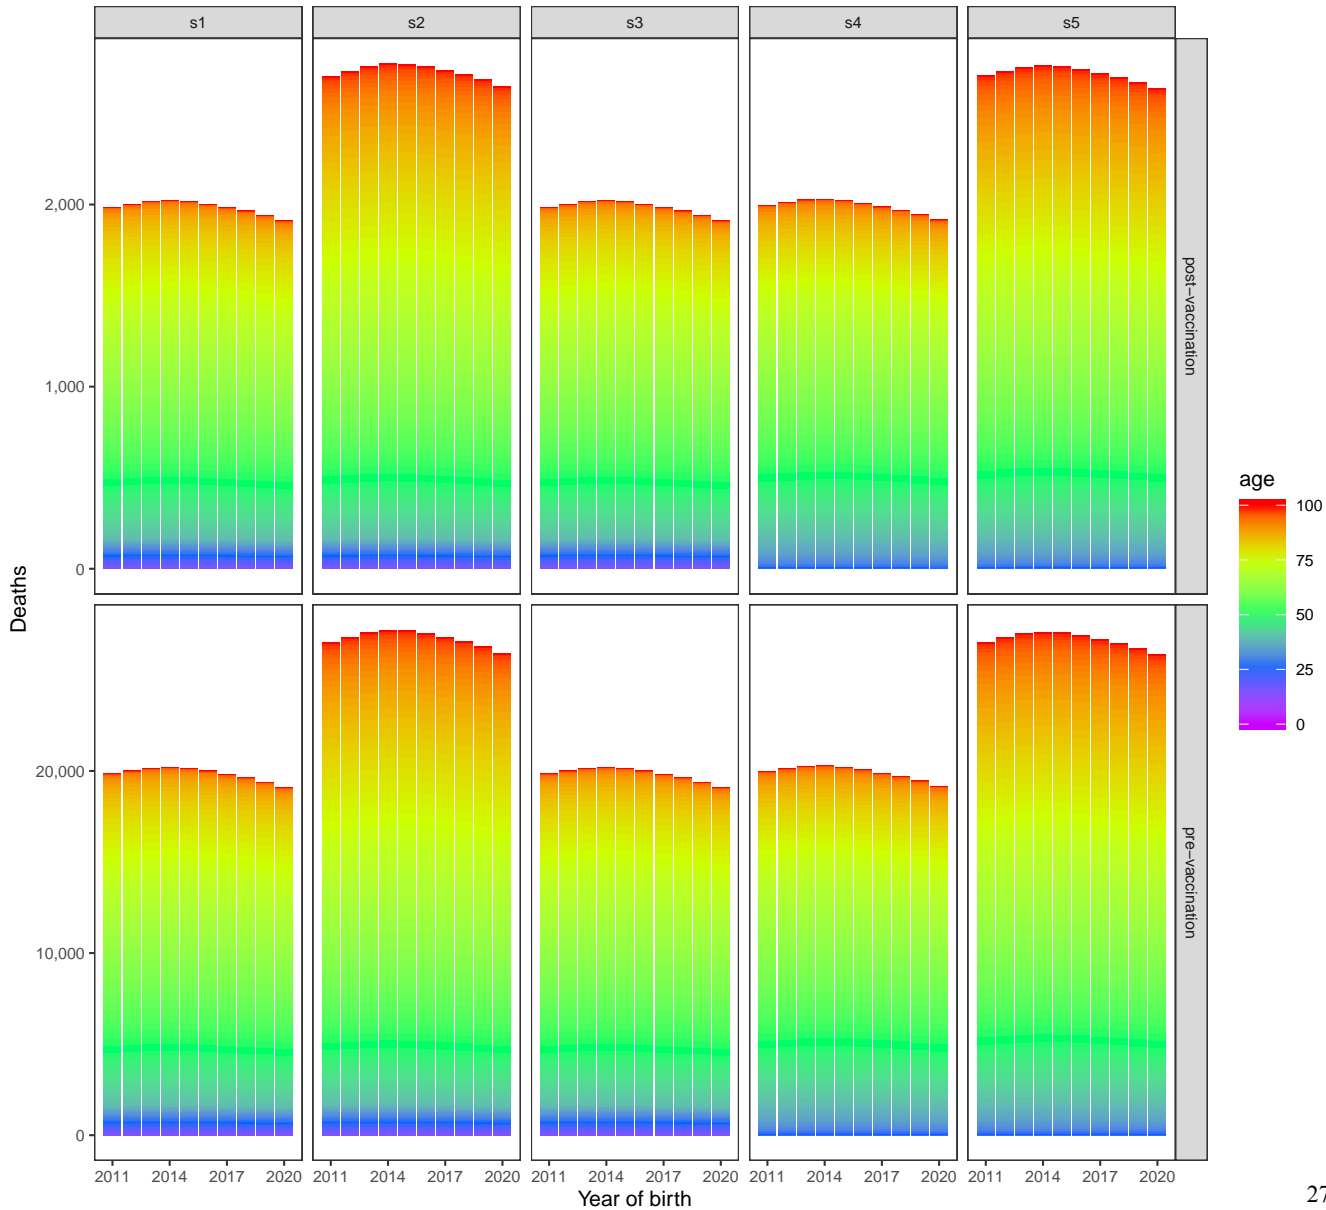

European Region  
 Lifetime burden of cervical cancer YLDs  
 caused by HPV 16/18 pre- and post-vaccination  
 (vaccination age = 9 years / bivalent/quadrivalent vaccine)

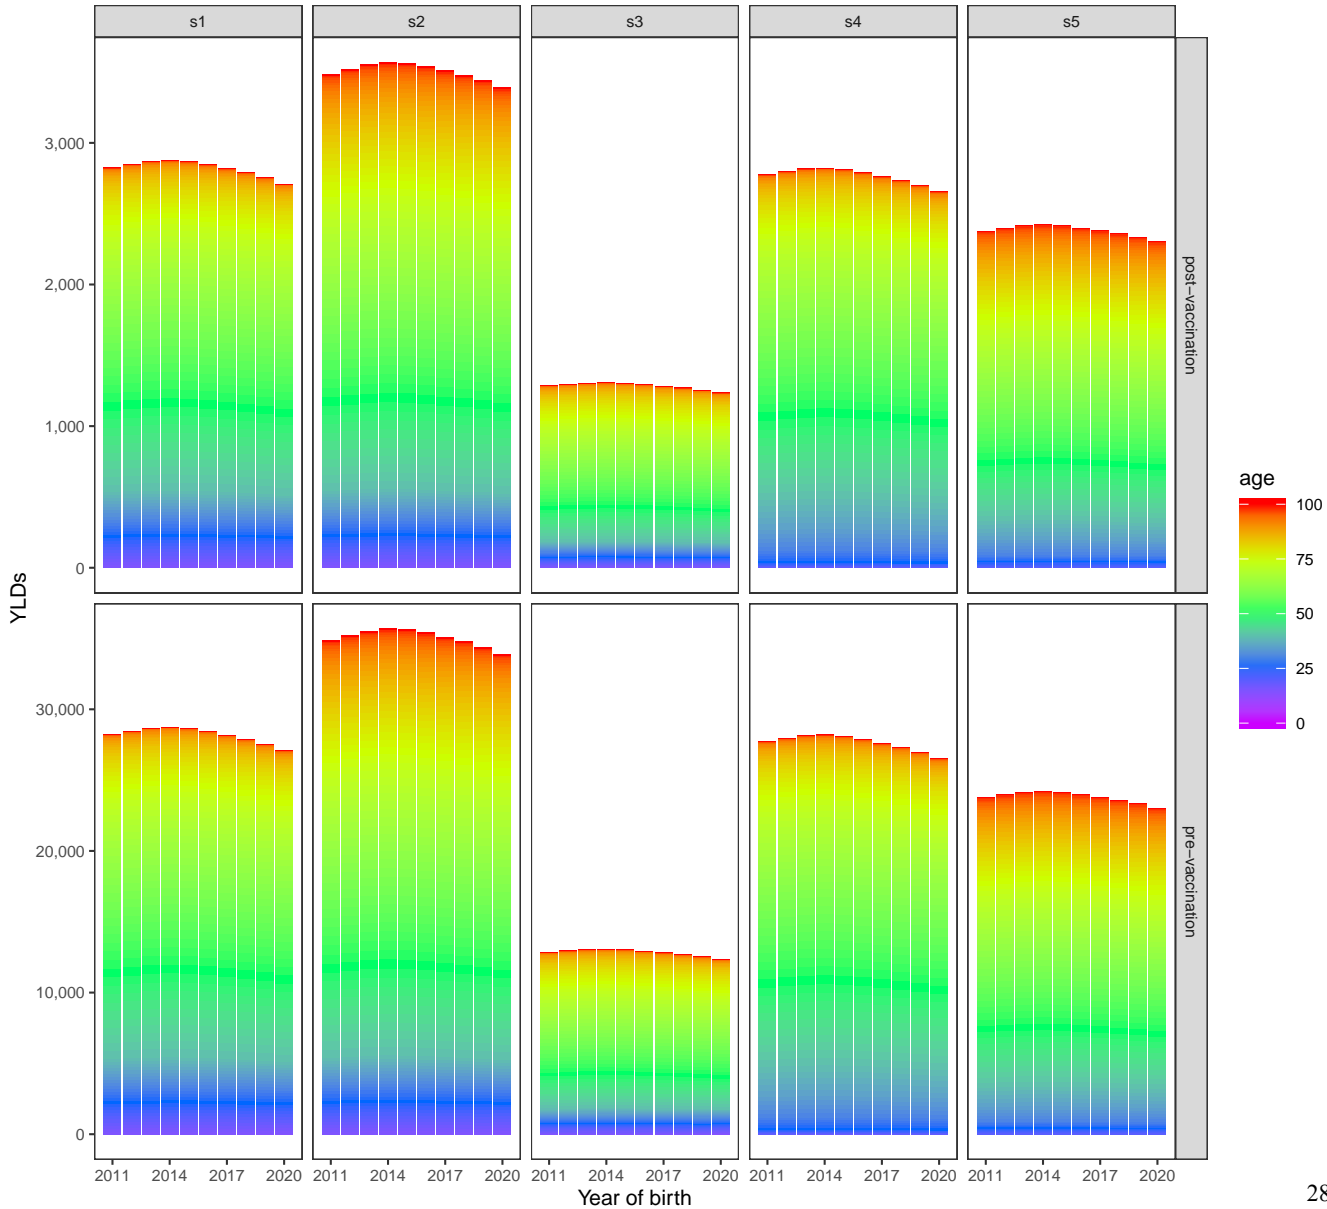

European Region  
 Lifetime burden of cervical cancer YLLs  
 caused by HPV 16/18 pre- and post-vaccination  
 (vaccination age = 9 years / bivalent/quadrivalent vaccine)

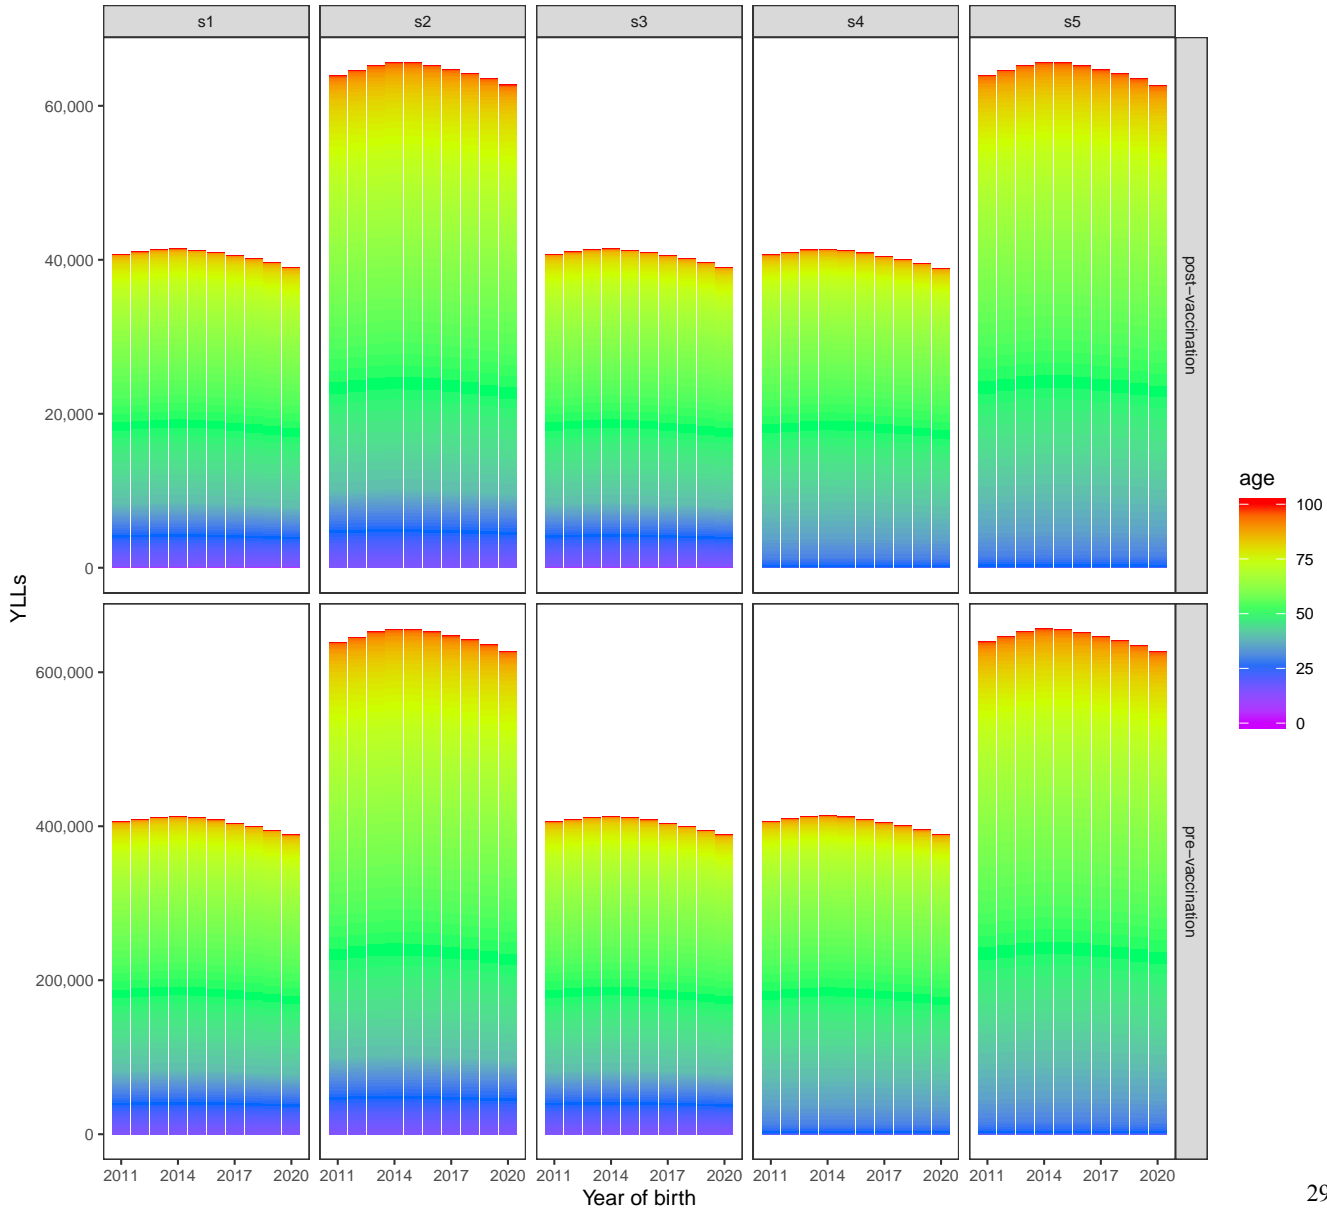

European Region  
 Lifetime burden of cervical cancer DALYs  
 caused by HPV 16/18 pre- and post-vaccination  
 (vaccination age = 9 years / bivalent/quadrivalent vaccine)

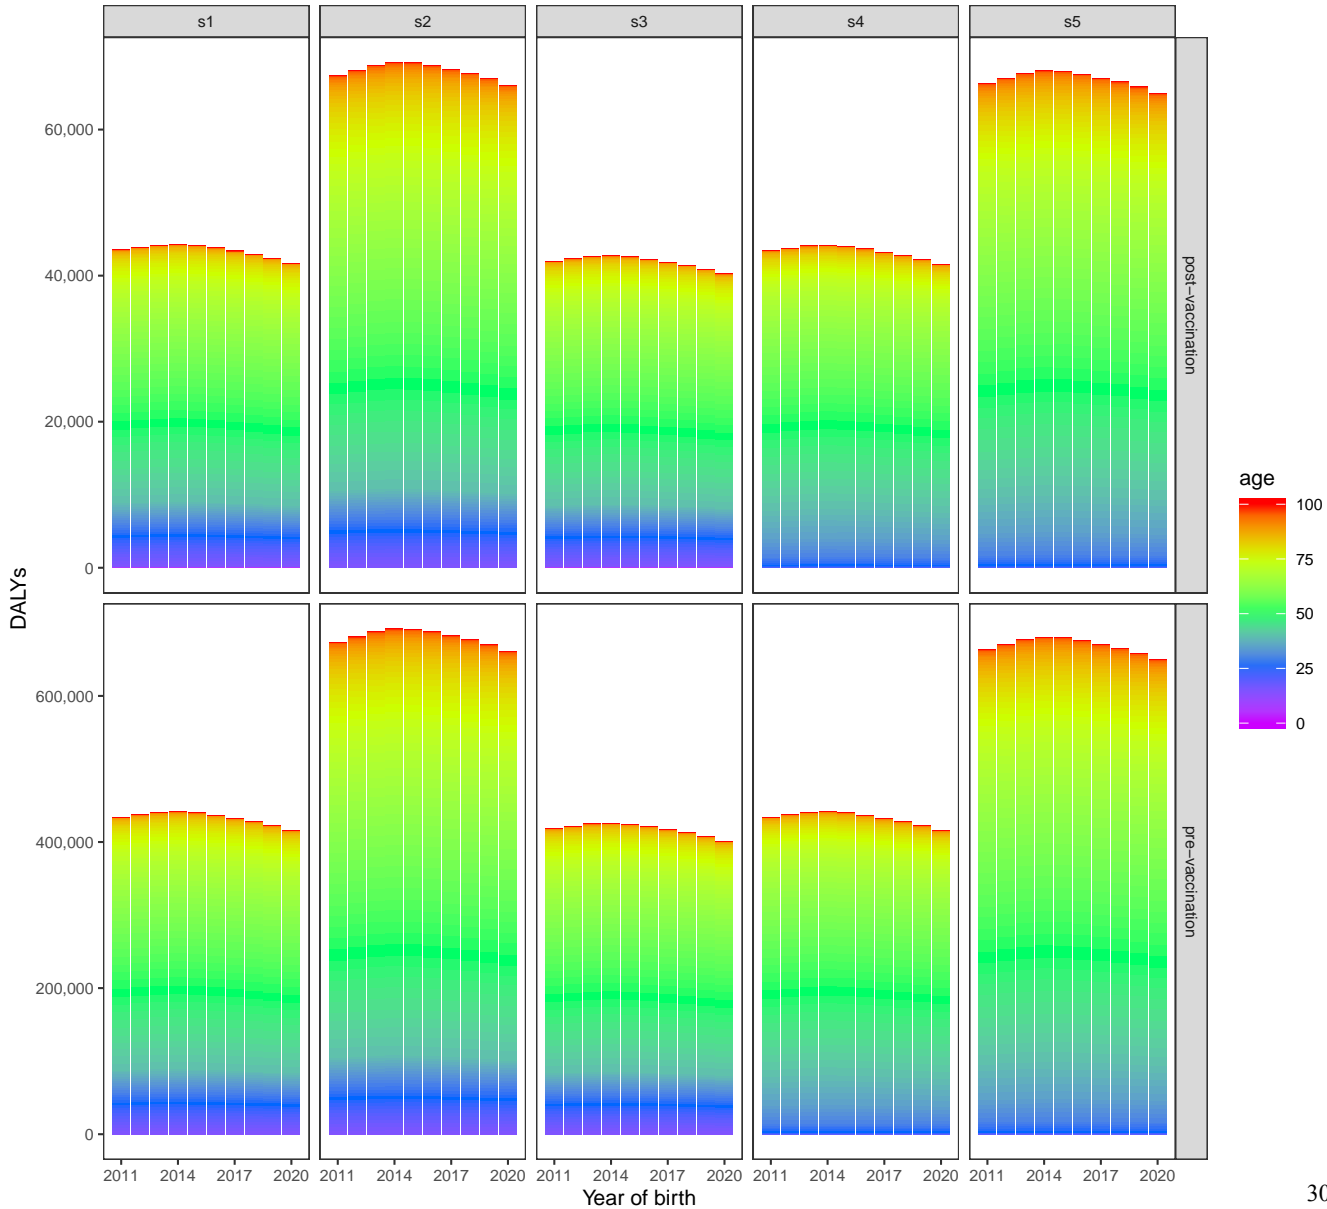

Region of the Americas  
 Lifetime burden of cervical cancer Cases  
 caused by HPV 16/18 pre- and post-vaccination  
 (vaccination age = 9 years / bivalent/quadrivalent vaccine)

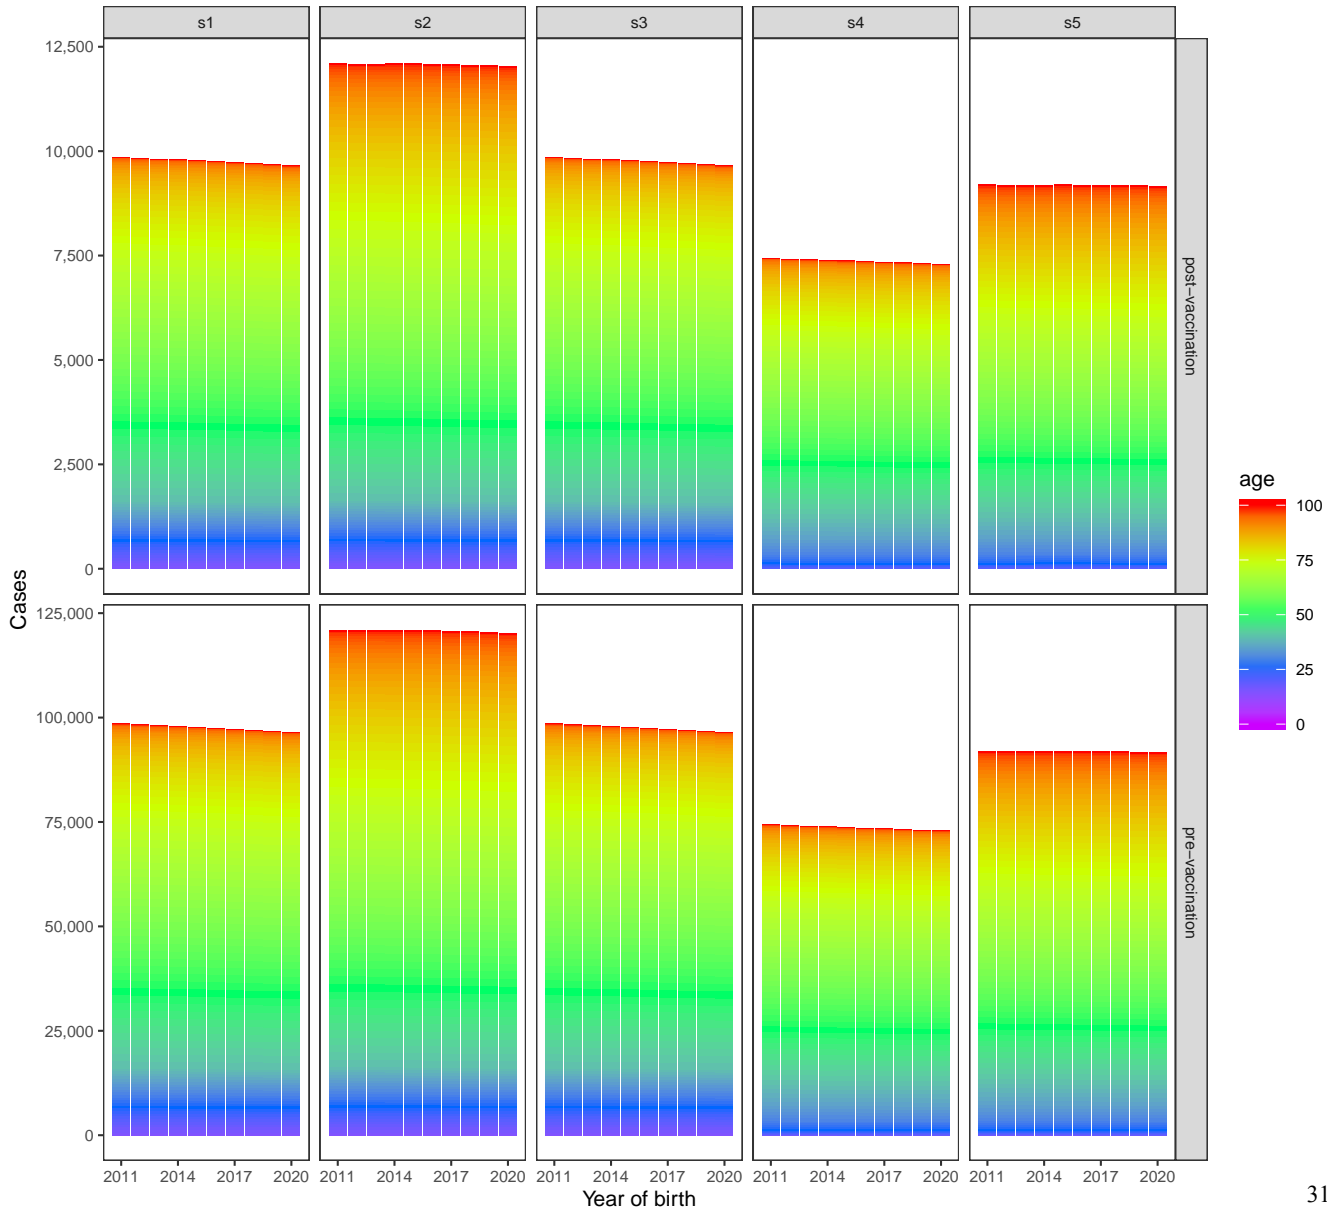

Region of the Americas  
 Lifetime burden of cervical cancer Deaths  
 caused by HPV 16/18 pre- and post-vaccination  
 (vaccination age = 9 years / bivalent/quadrivalent vaccine)

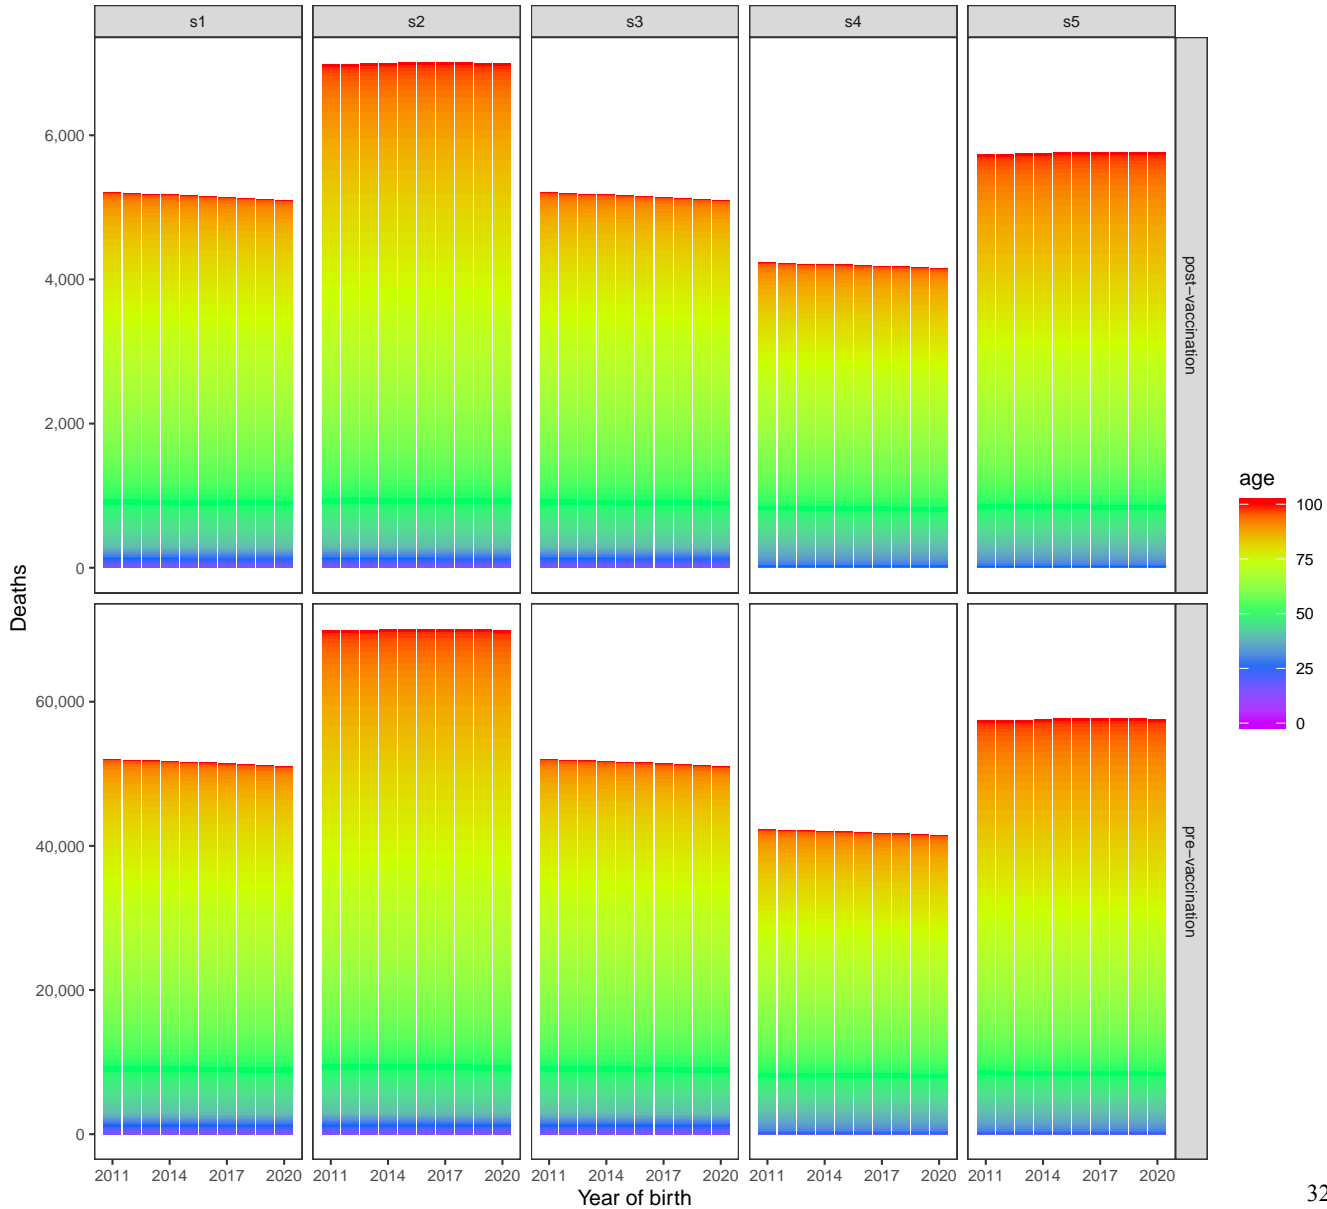

Region of the Americas  
 Lifetime burden of cervical cancer YLDs  
 caused by HPV 16/18 pre- and post-vaccination  
 (vaccination age = 9 years / bivalent/quadrivalent vaccine)

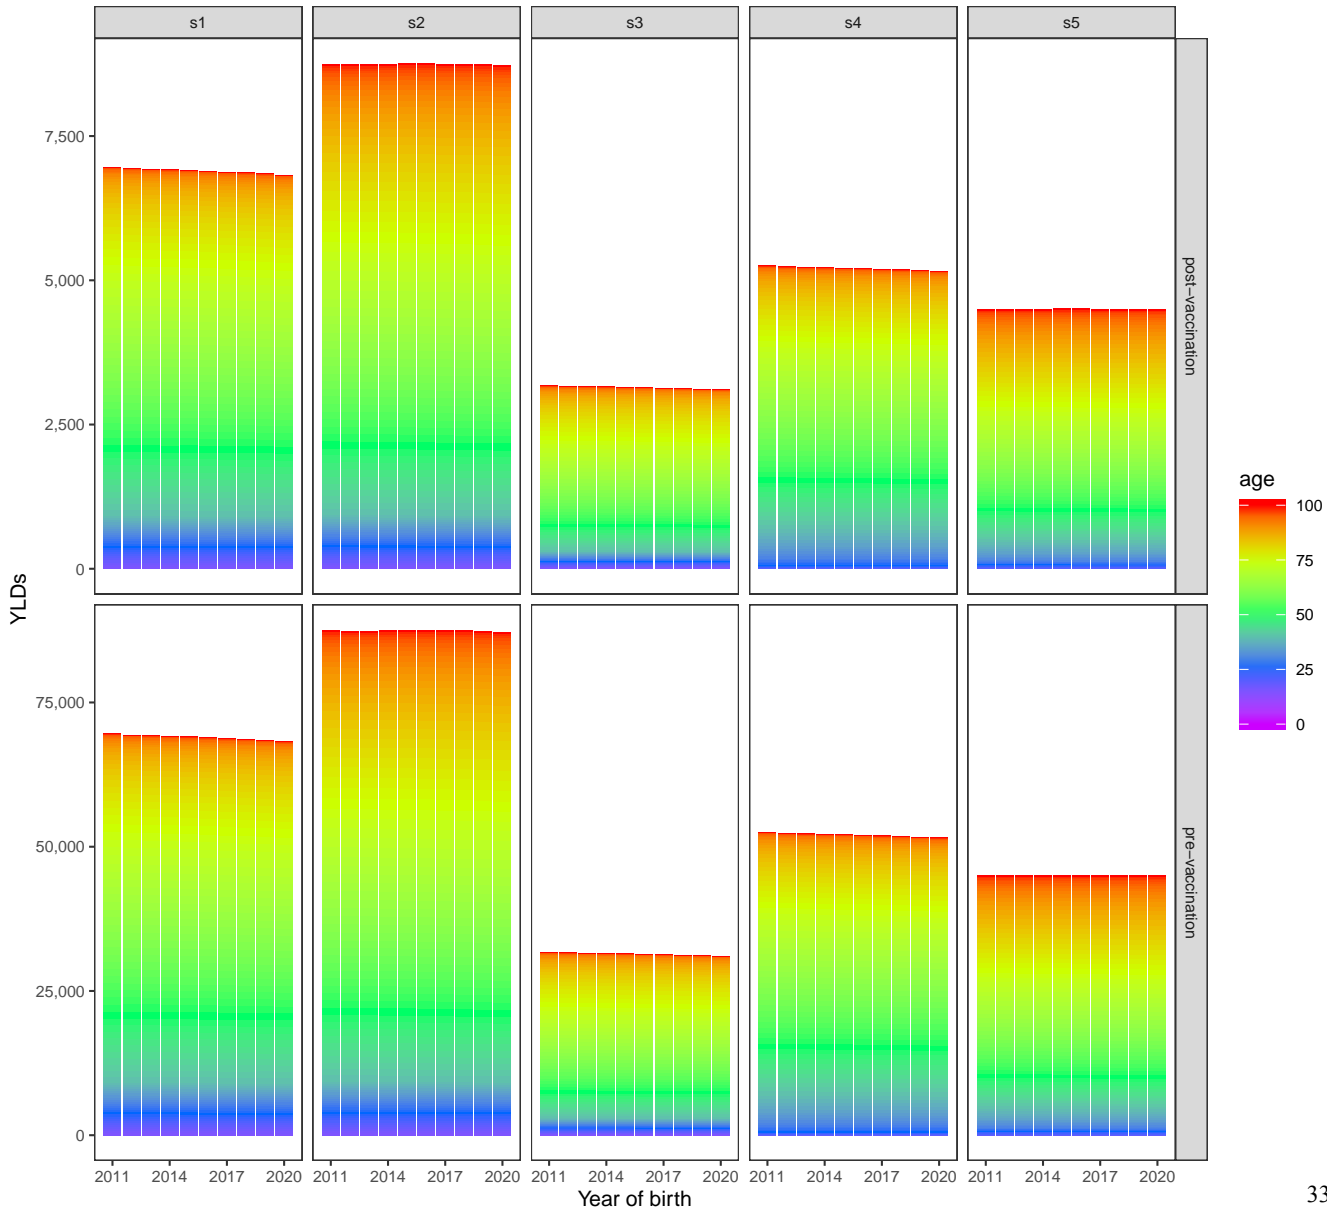



Region of the Americas  
 Lifetime burden of cervical cancer YLLs  
 caused by HPV 16/18 pre- and post-vaccination  
 (vaccination age = 9 years / bivalent/quadrivalent vaccine)

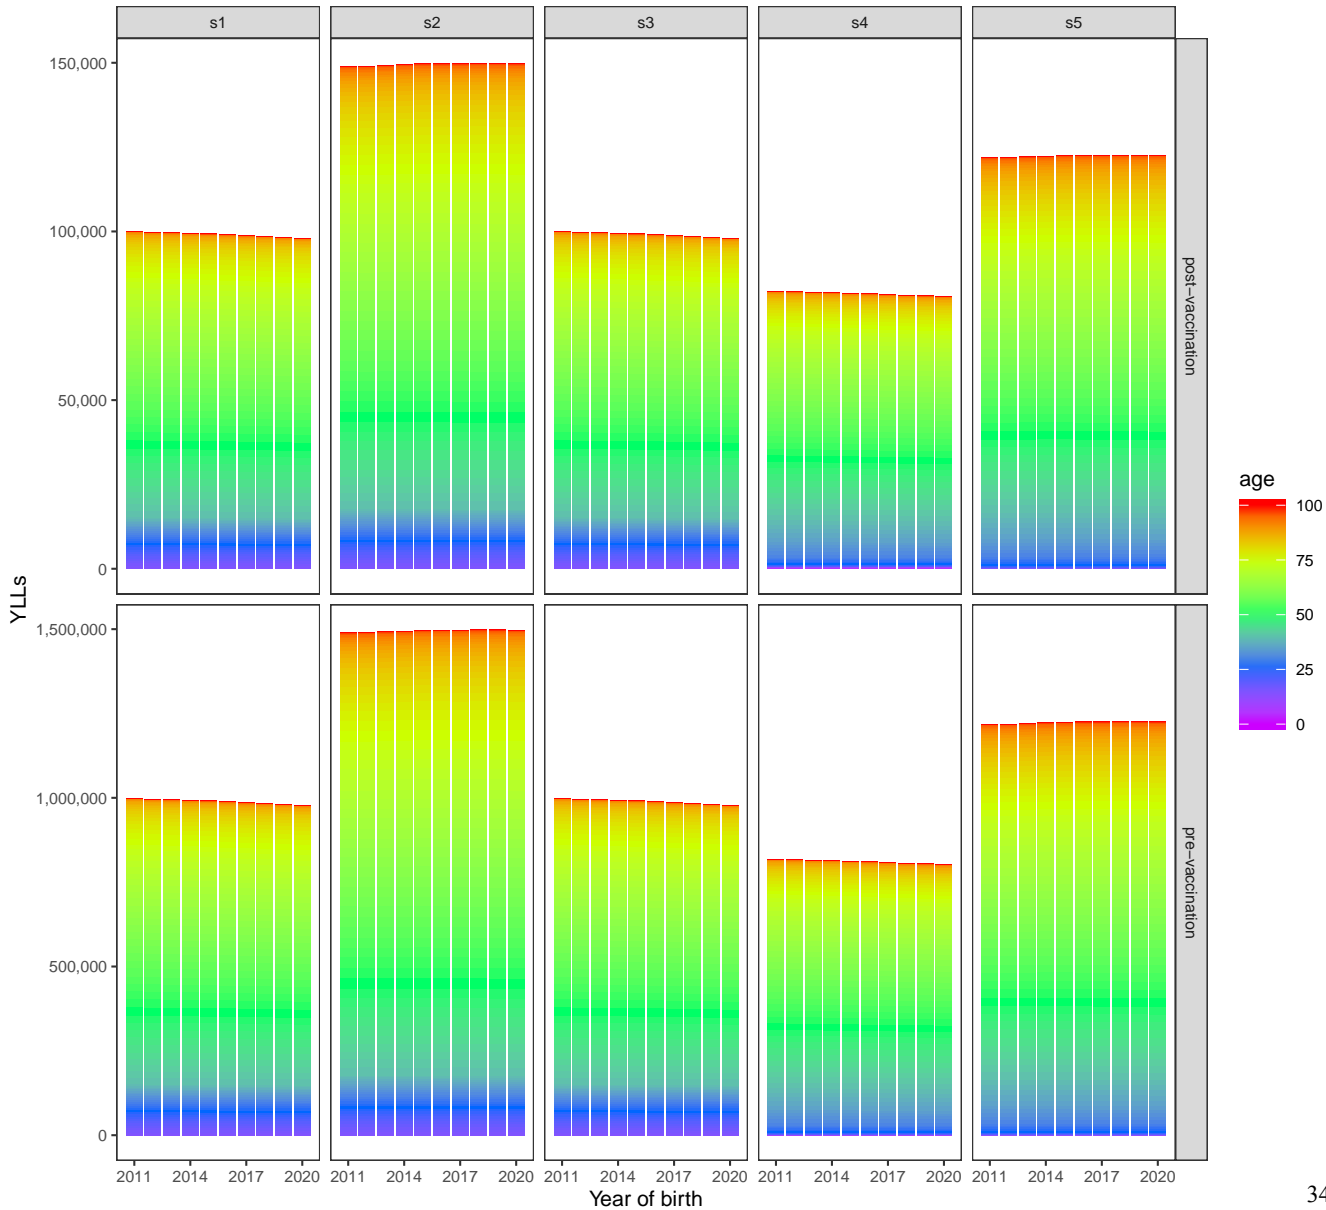

Region of the Americas  
 Lifetime burden of cervical cancer DALYs  
 caused by HPV 16/18 pre- and post-vaccination  
 (vaccination age = 9 years / bivalent/quadrivalent vaccine)

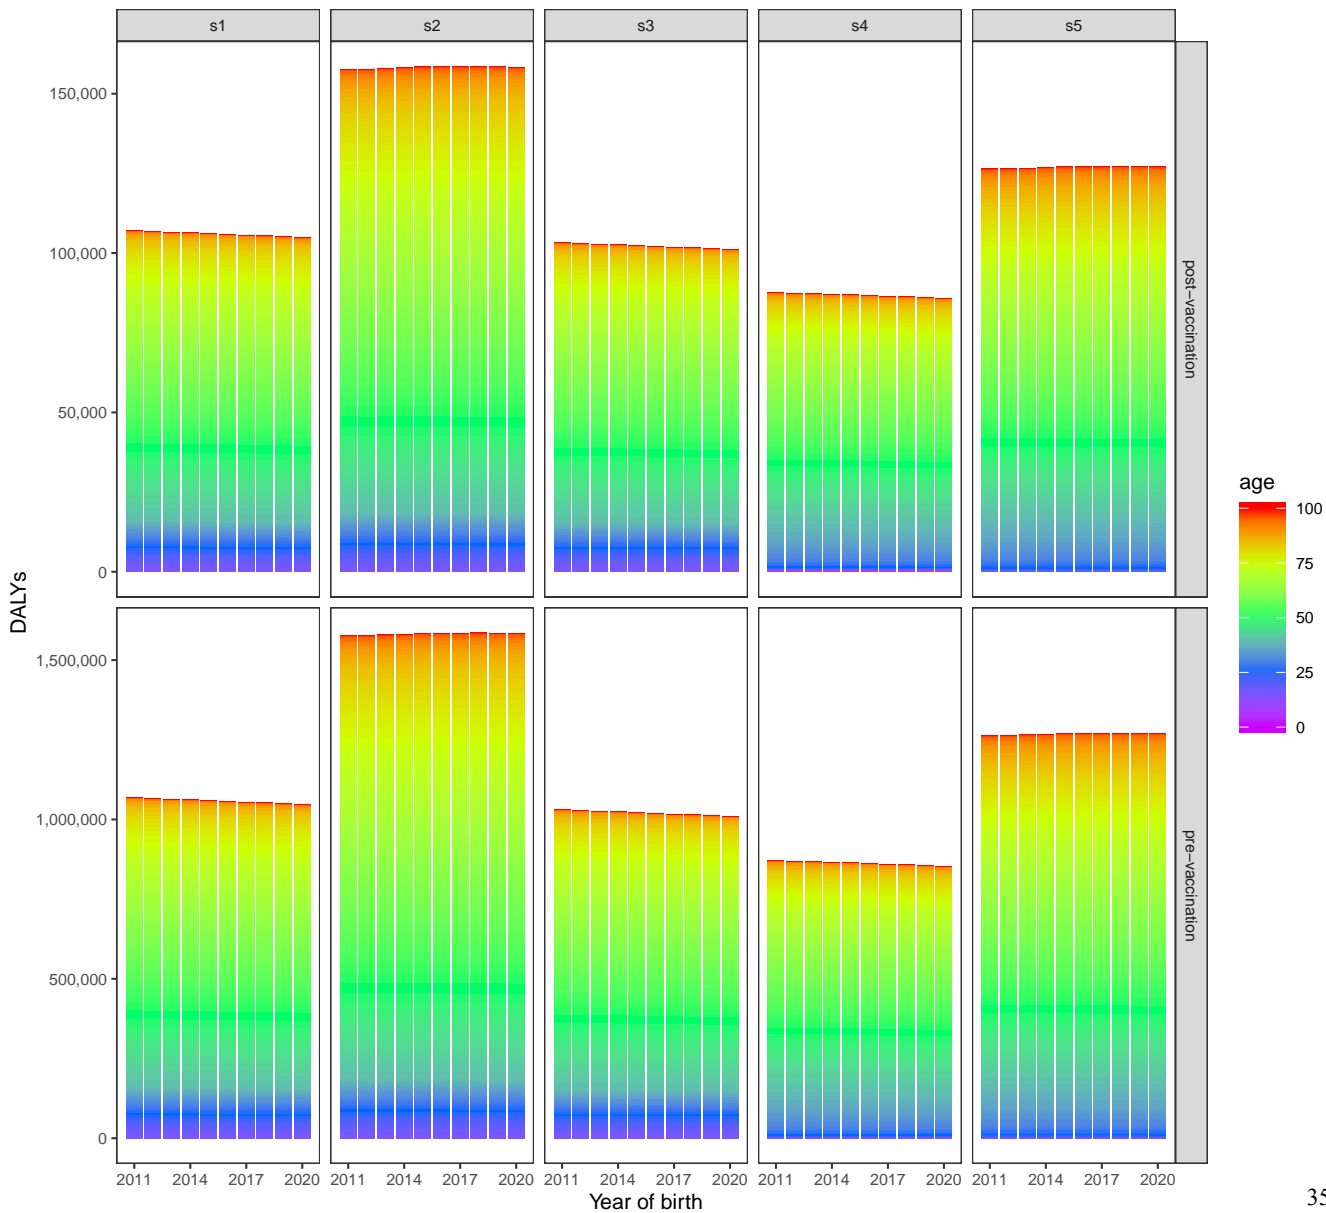

Western Pacific Region  
 Lifetime burden of cervical cancer Cases  
 caused by HPV 16/18 pre- and post-vaccination  
 (vaccination age = 9 years / bivalent/quadrivalent vaccine)

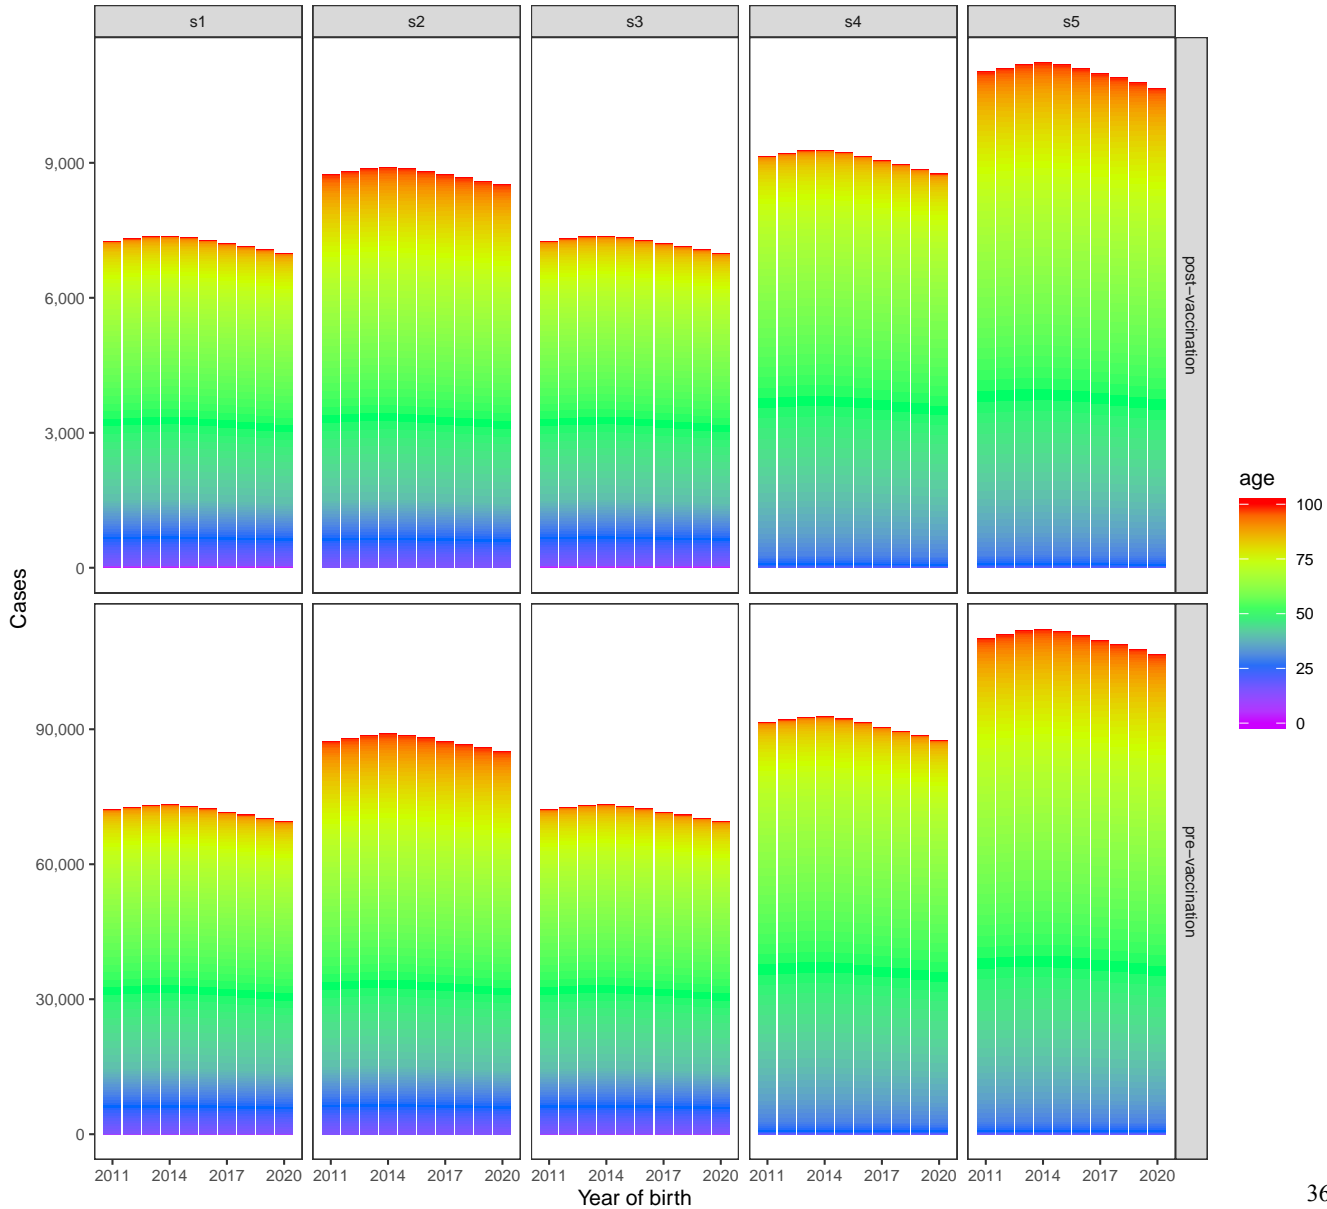

Western Pacific Region  
 Lifetime burden of cervical cancer Deaths  
 caused by HPV 16/18 pre- and post-vaccination  
 (vaccination age = 9 years / bivalent/quadrivalent vaccine)

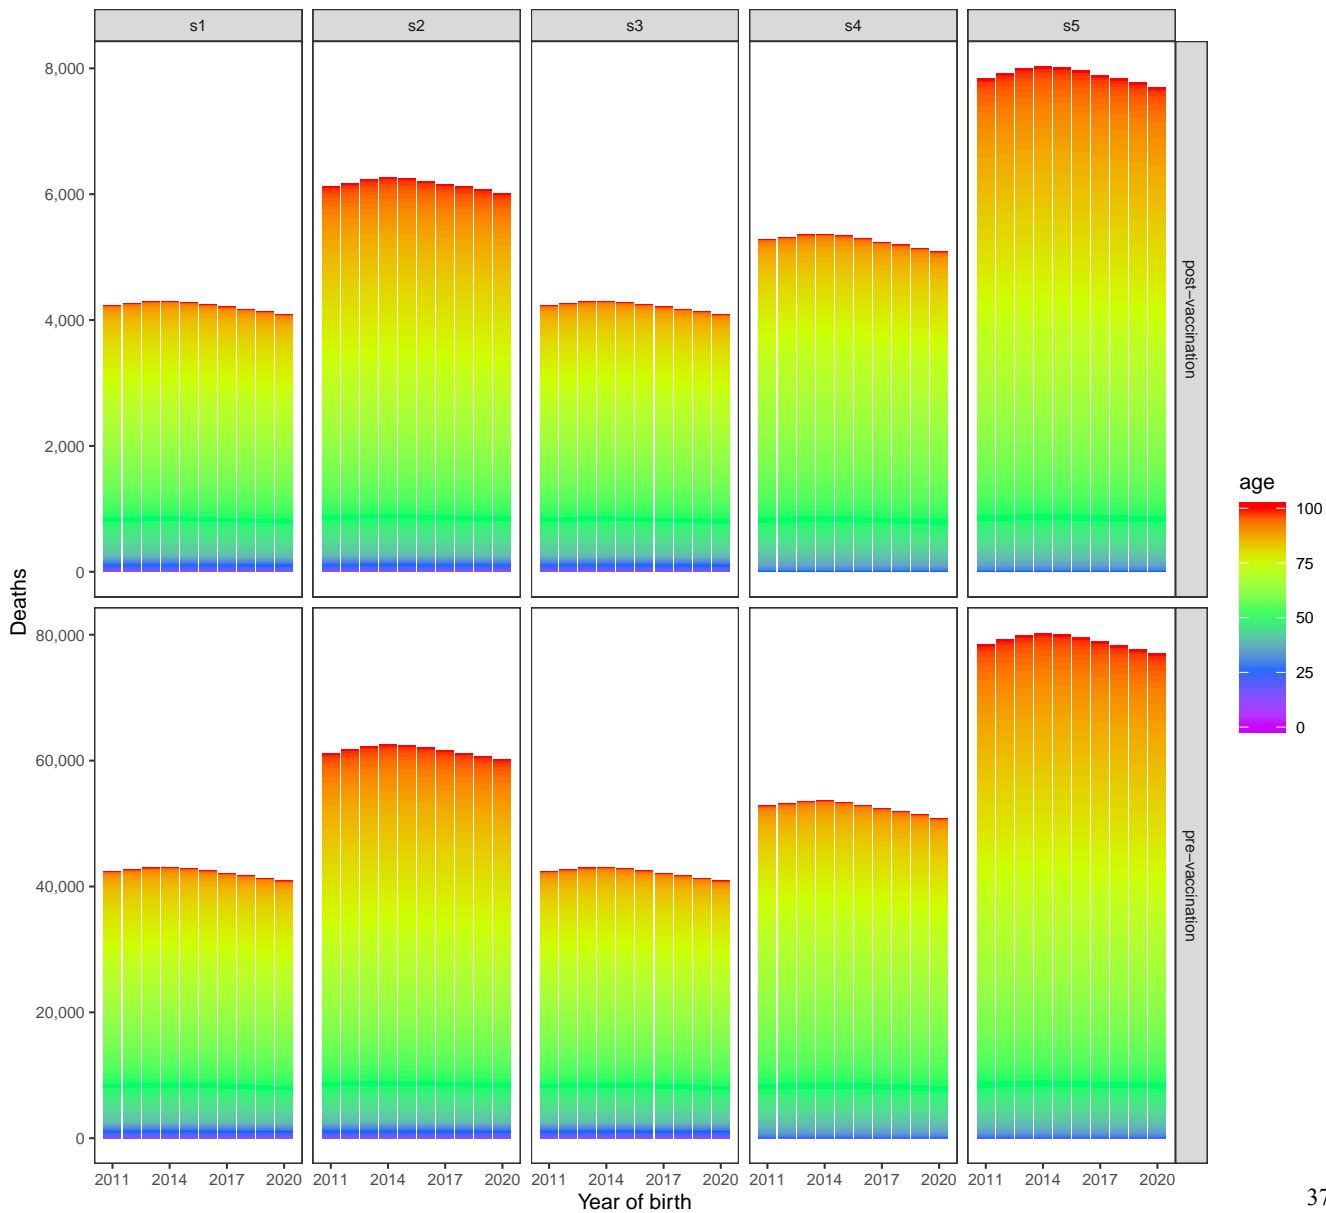

Western Pacific Region  
 Lifetime burden of cervical cancer YLDs  
 caused by HPV 16/18 pre- and post-vaccination  
 (vaccination age = 9 years / bivalent/quadrivalent vaccine)

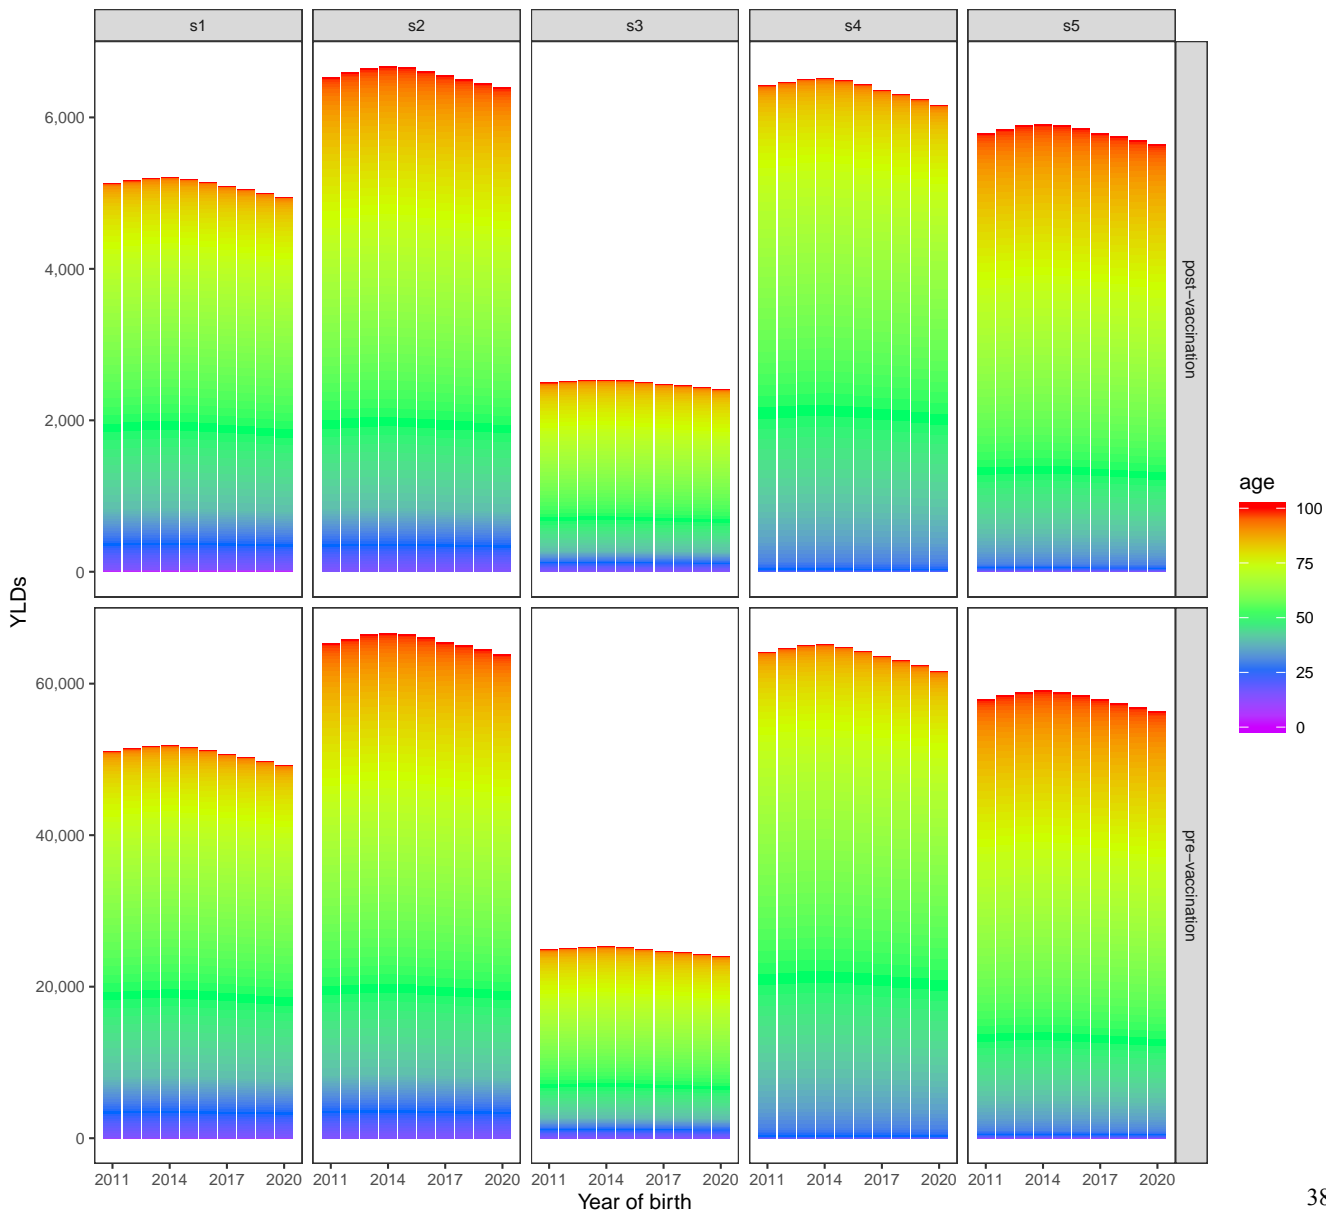

Western Pacific Region  
 Lifetime burden of cervical cancer YLLs  
 caused by HPV 16/18 pre- and post-vaccination  
 (vaccination age = 9 years / bivalent/quadrivalent vaccine)

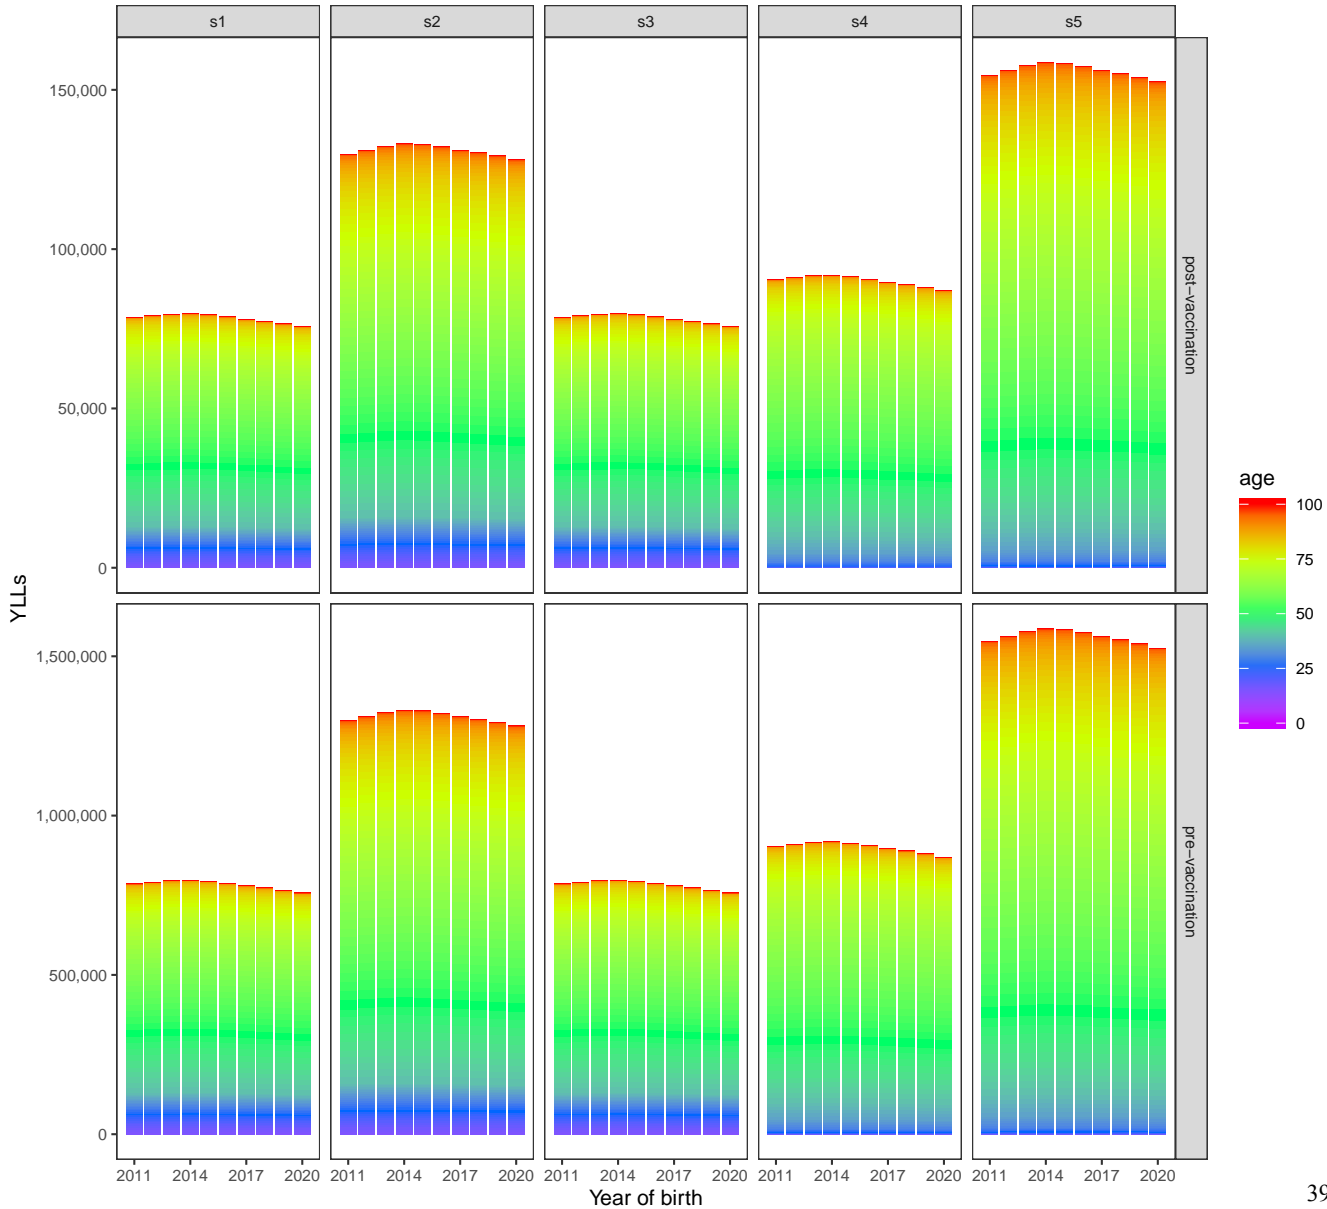

Western Pacific Region  
 Lifetime burden of cervical cancer DALYs  
 caused by HPV 16/18 pre- and post-vaccination  
 (vaccination age = 9 years / bivalent/quadrivalent vaccine)

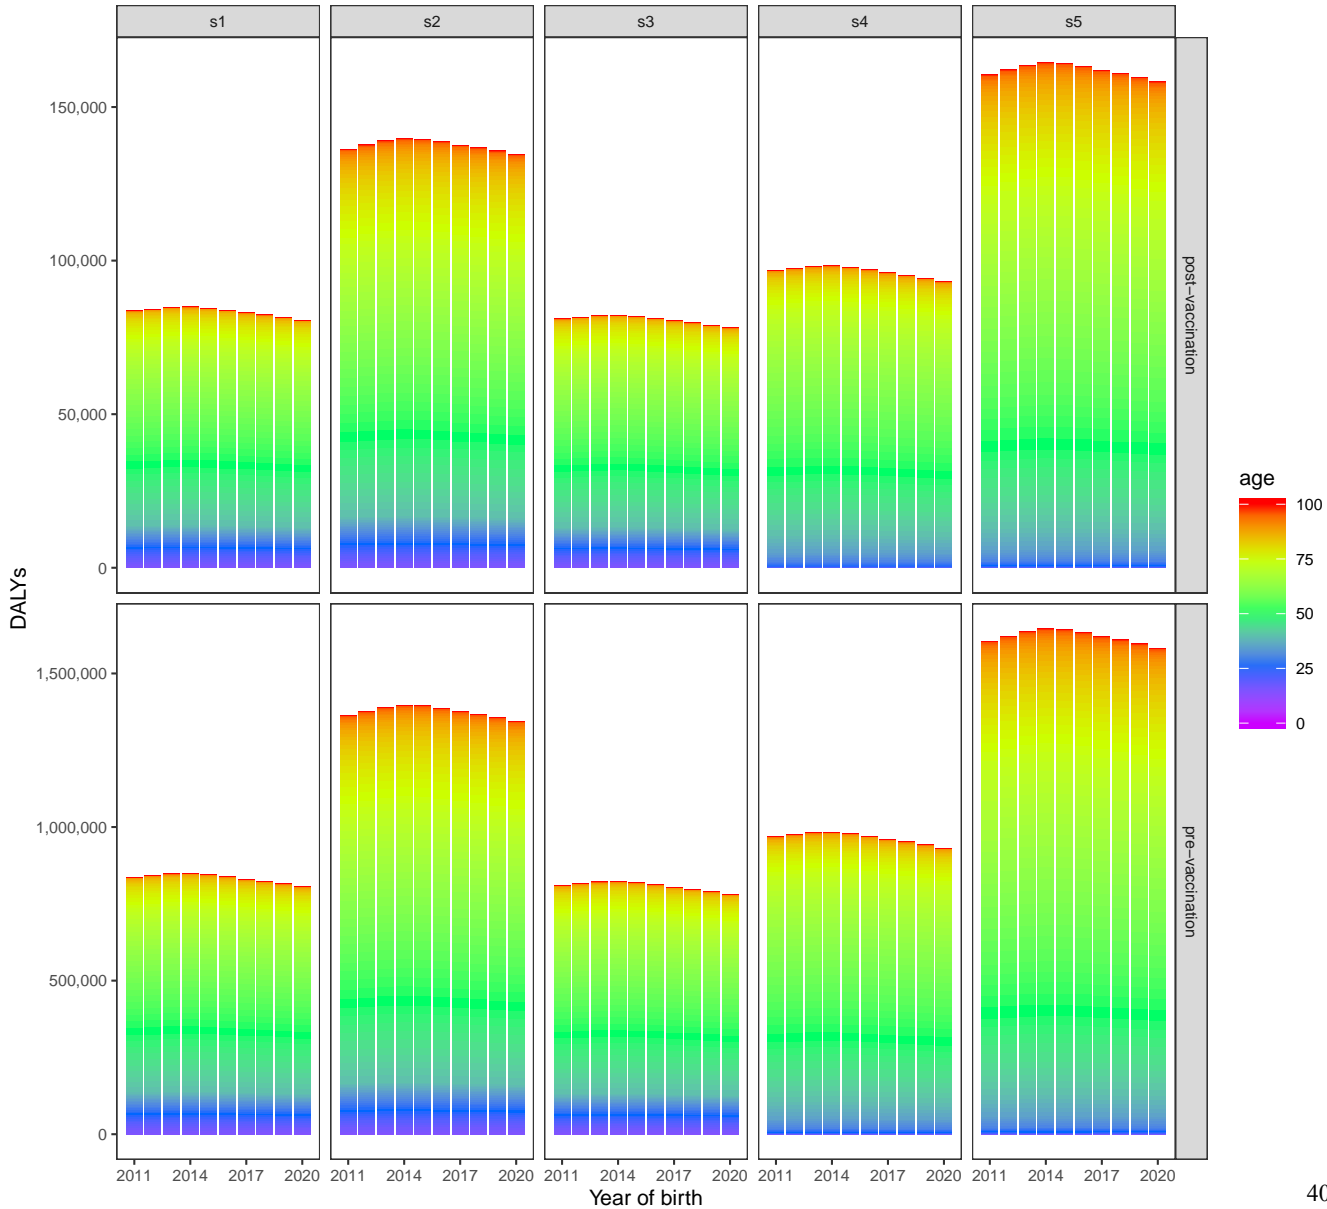

South-East Asia Region  
 Lifetime burden of cervical cancer Cases  
 caused by HPV 16/18 pre- and post-vaccination  
 (vaccination age = 9 years / bivalent/quadrivalent vaccine)

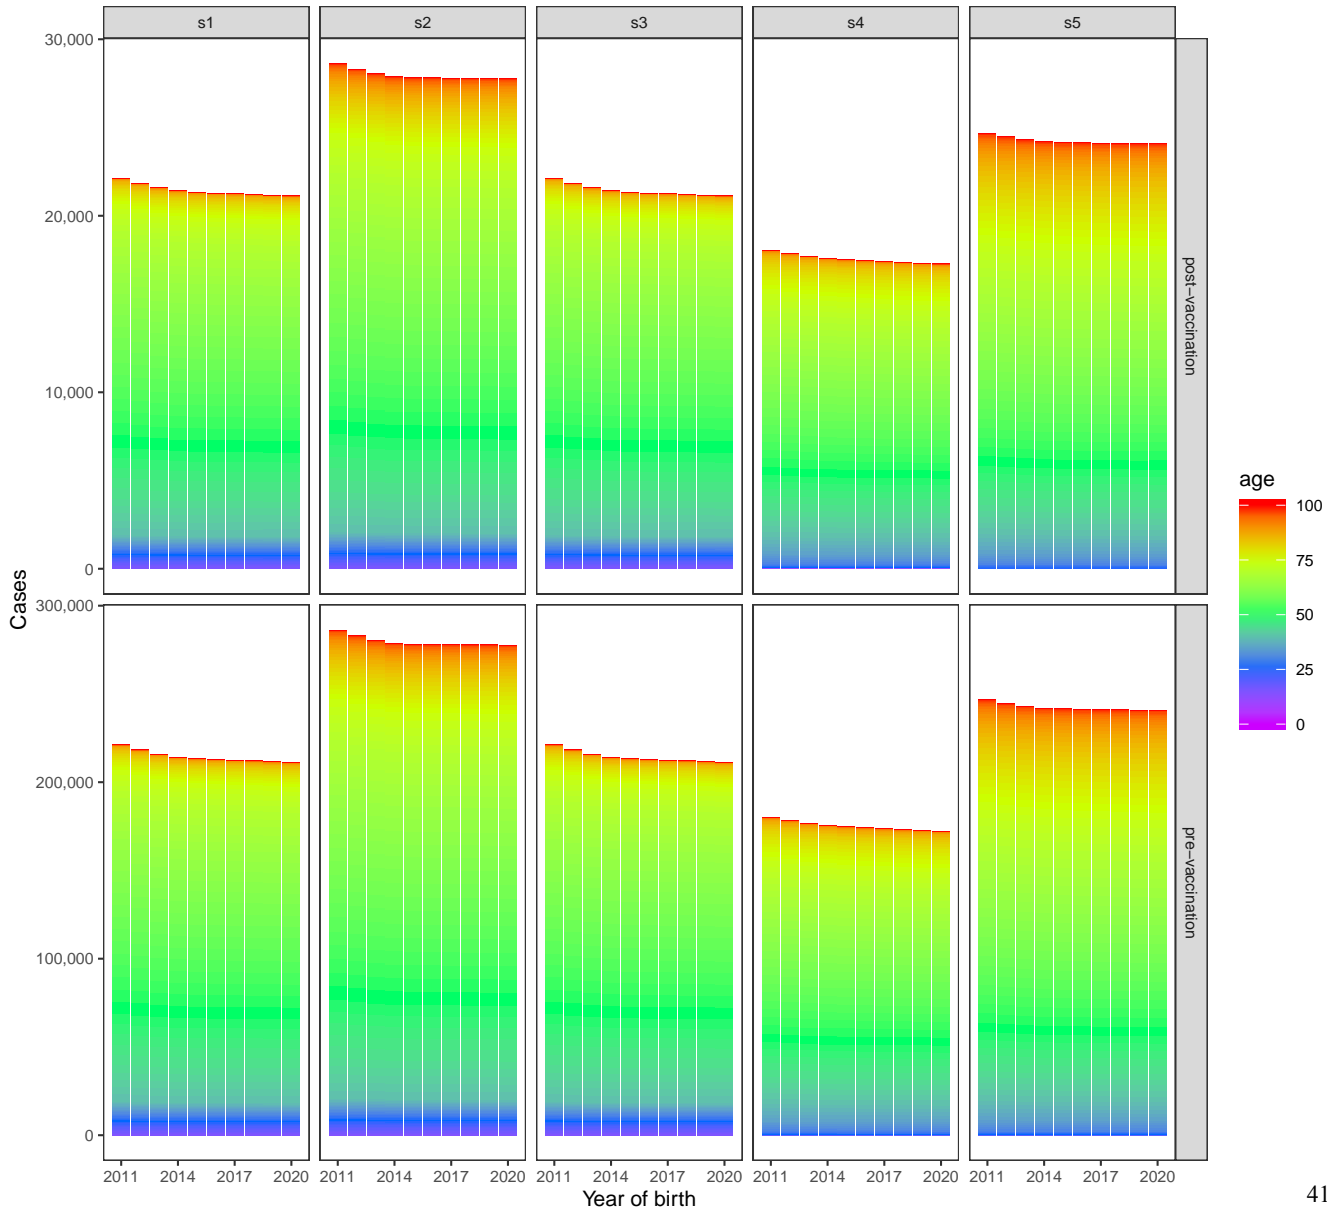



South-East Asia Region  
 Lifetime burden of cervical cancer Deaths  
 caused by HPV 16/18 pre- and post-vaccination  
 (vaccination age = 9 years / bivalent/quadrivalent vaccine)

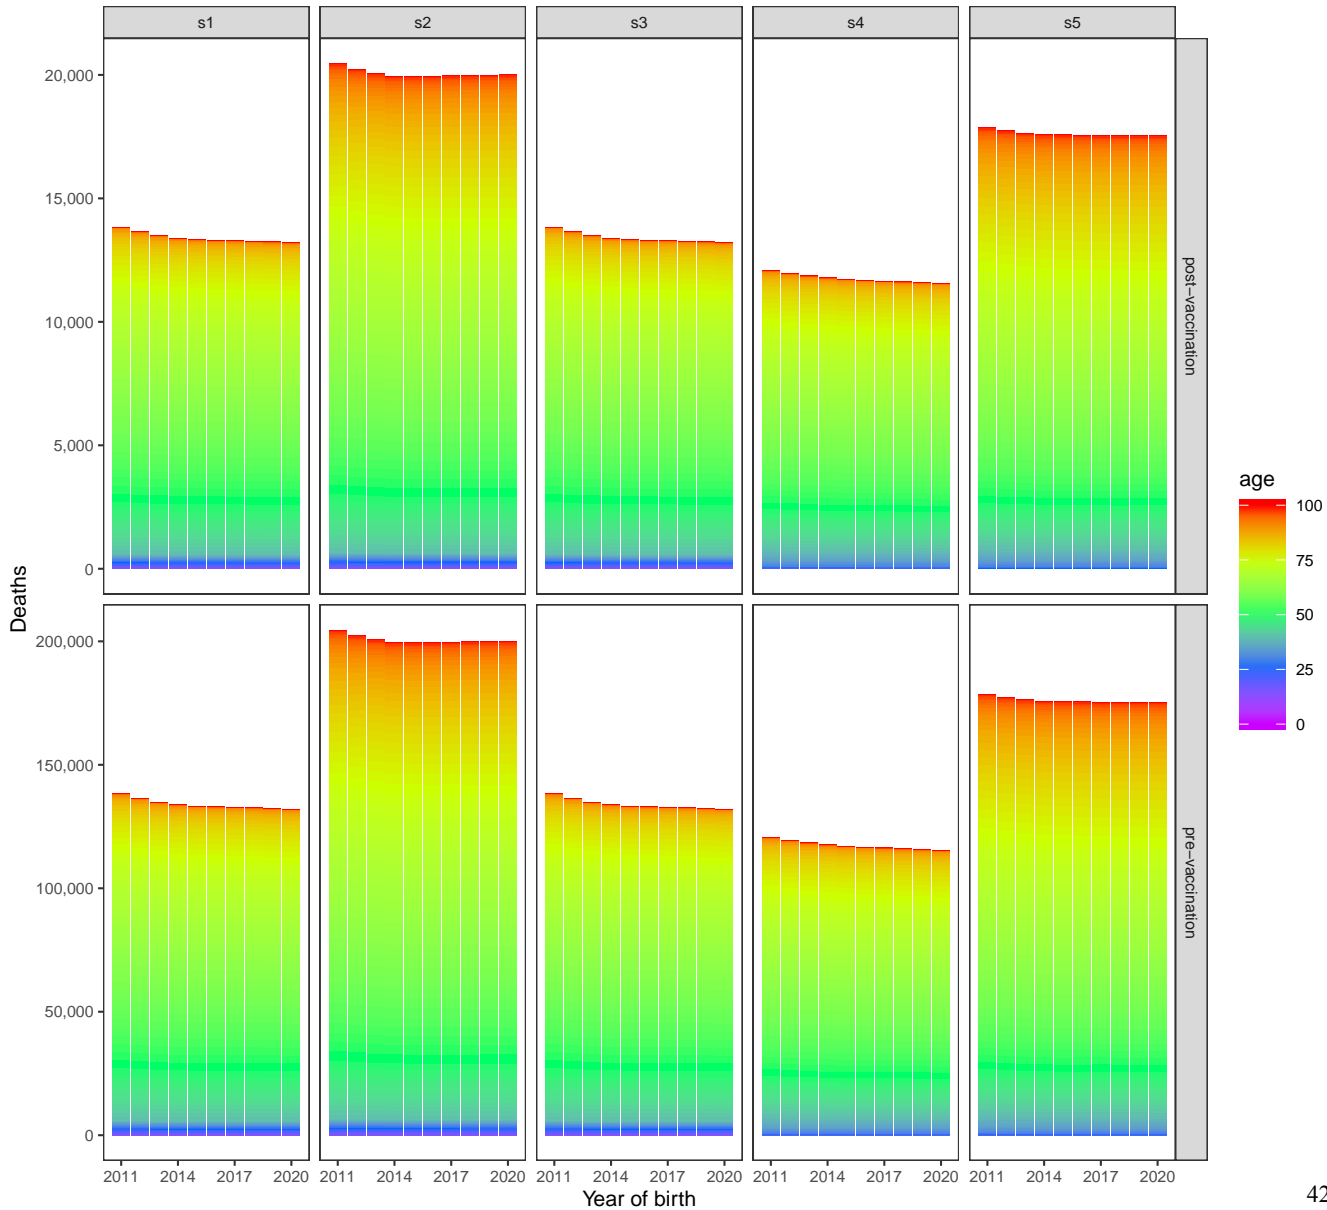

South-East Asia Region  
 Lifetime burden of cervical cancer YLDs  
 caused by HPV 16/18 pre- and post-vaccination  
 (vaccination age = 9 years / bivalent/quadrivalent vaccine)

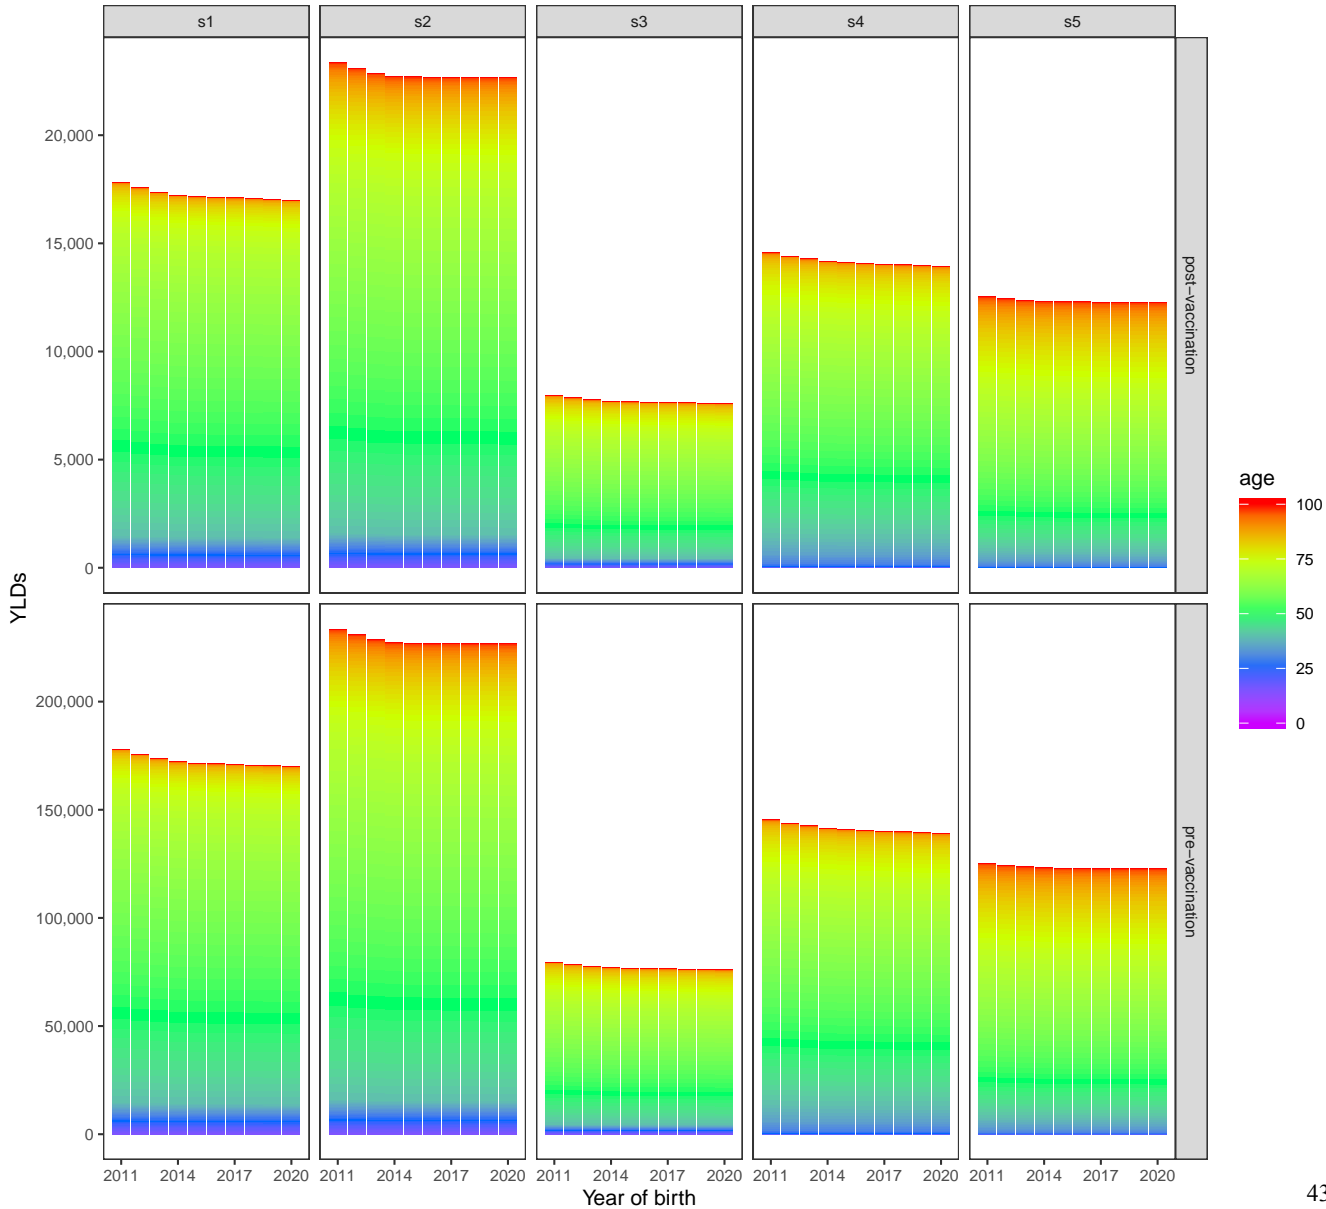

South-East Asia Region  
 Lifetime burden of cervical cancer YLLs  
 caused by HPV 16/18 pre- and post-vaccination  
 (vaccination age = 9 years / bivalent/quadrivalent vaccine)

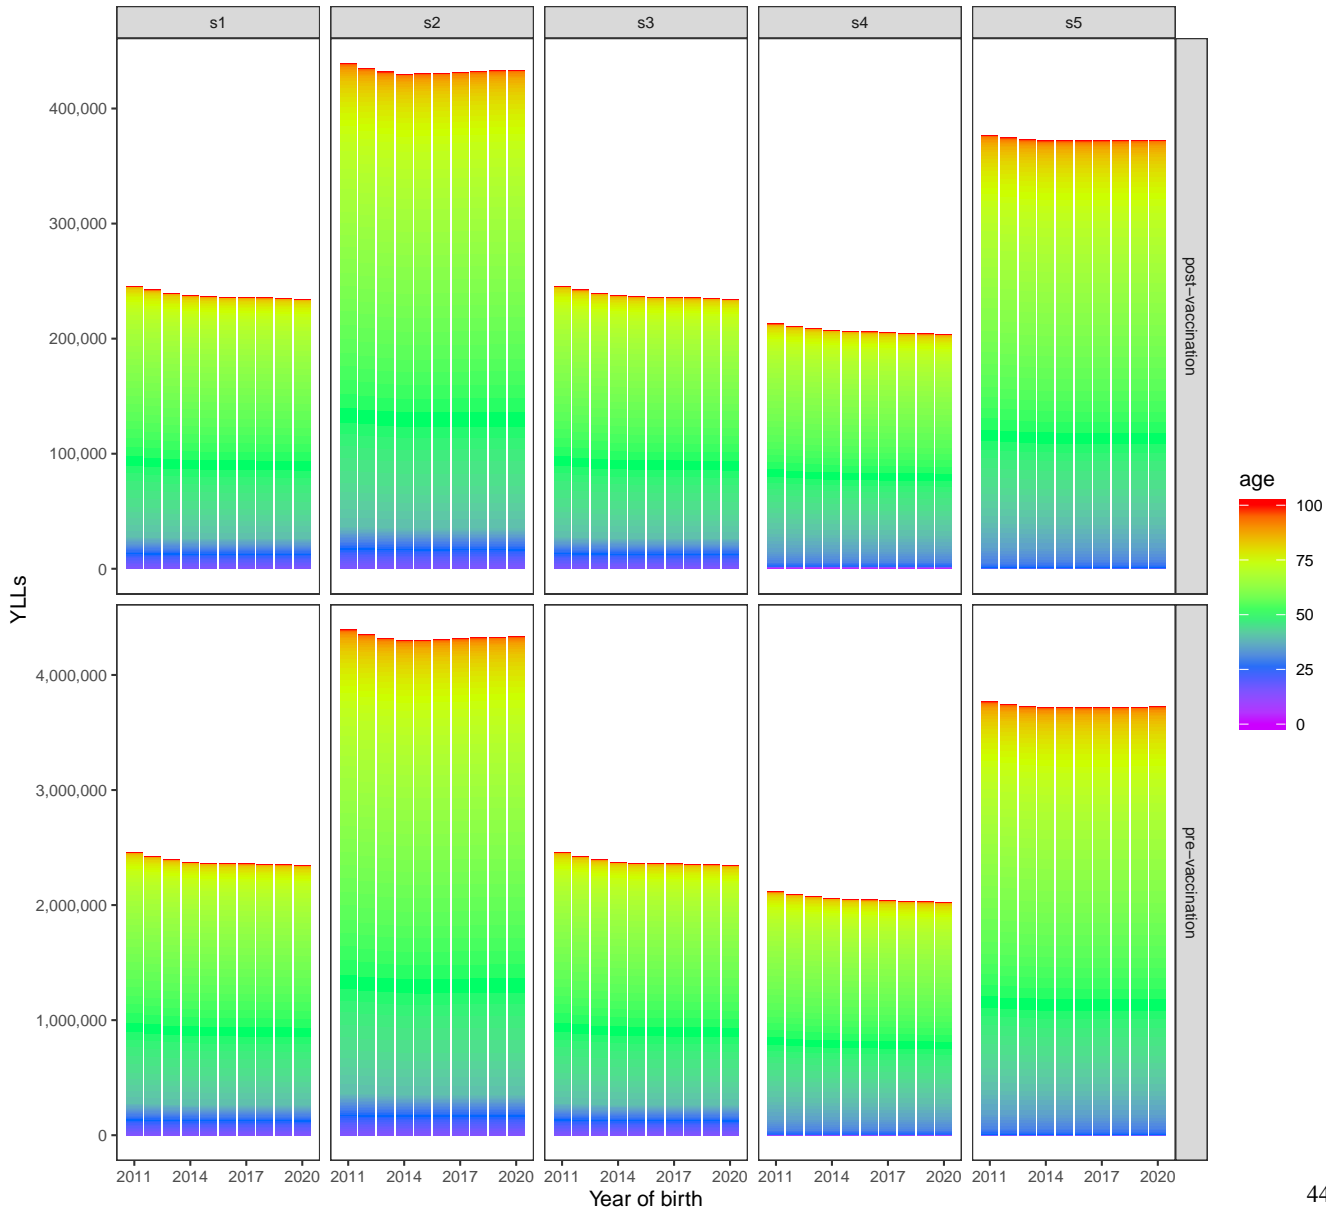

South-East Asia Region  
 Lifetime burden of cervical cancer DALYs  
 caused by HPV 16/18 pre- and post-vaccination  
 (vaccination age = 9 years / bivalent/quadrivalent vaccine)

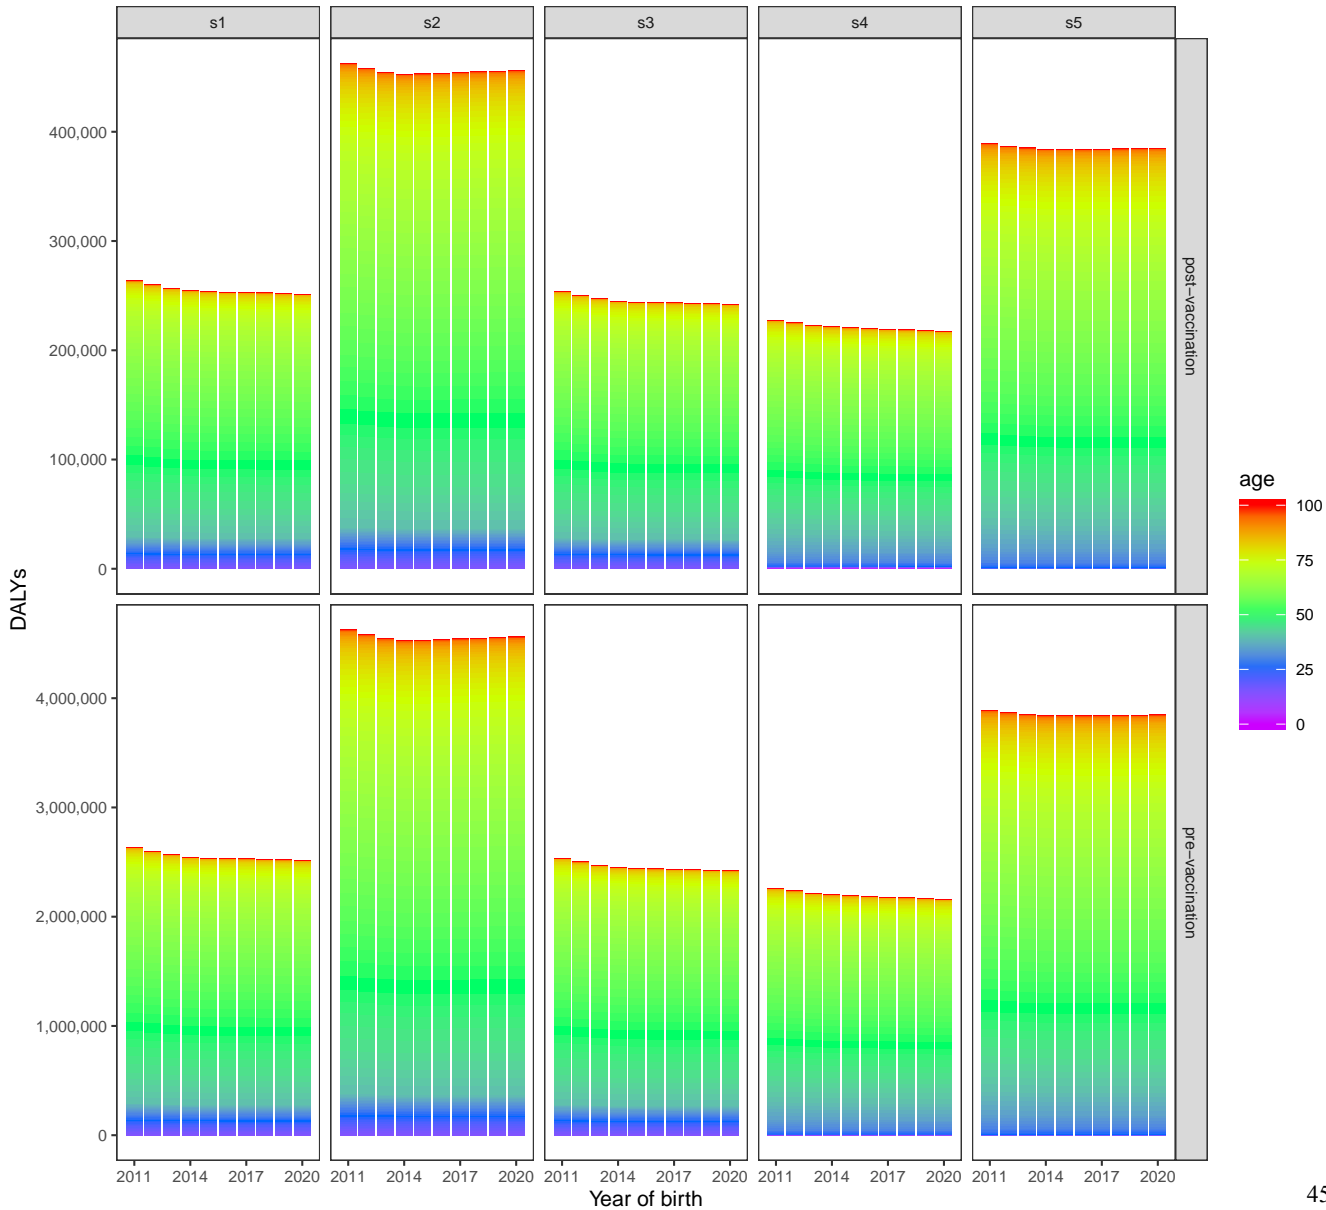

Eastern Mediterranean Region  
 Lifetime burden of cervical cancer Cases  
 caused by HPV 16/18/31/33/45/52/58 pre- and post-vaccination  
 (vaccination age = 9 years / nonavalent vaccine)

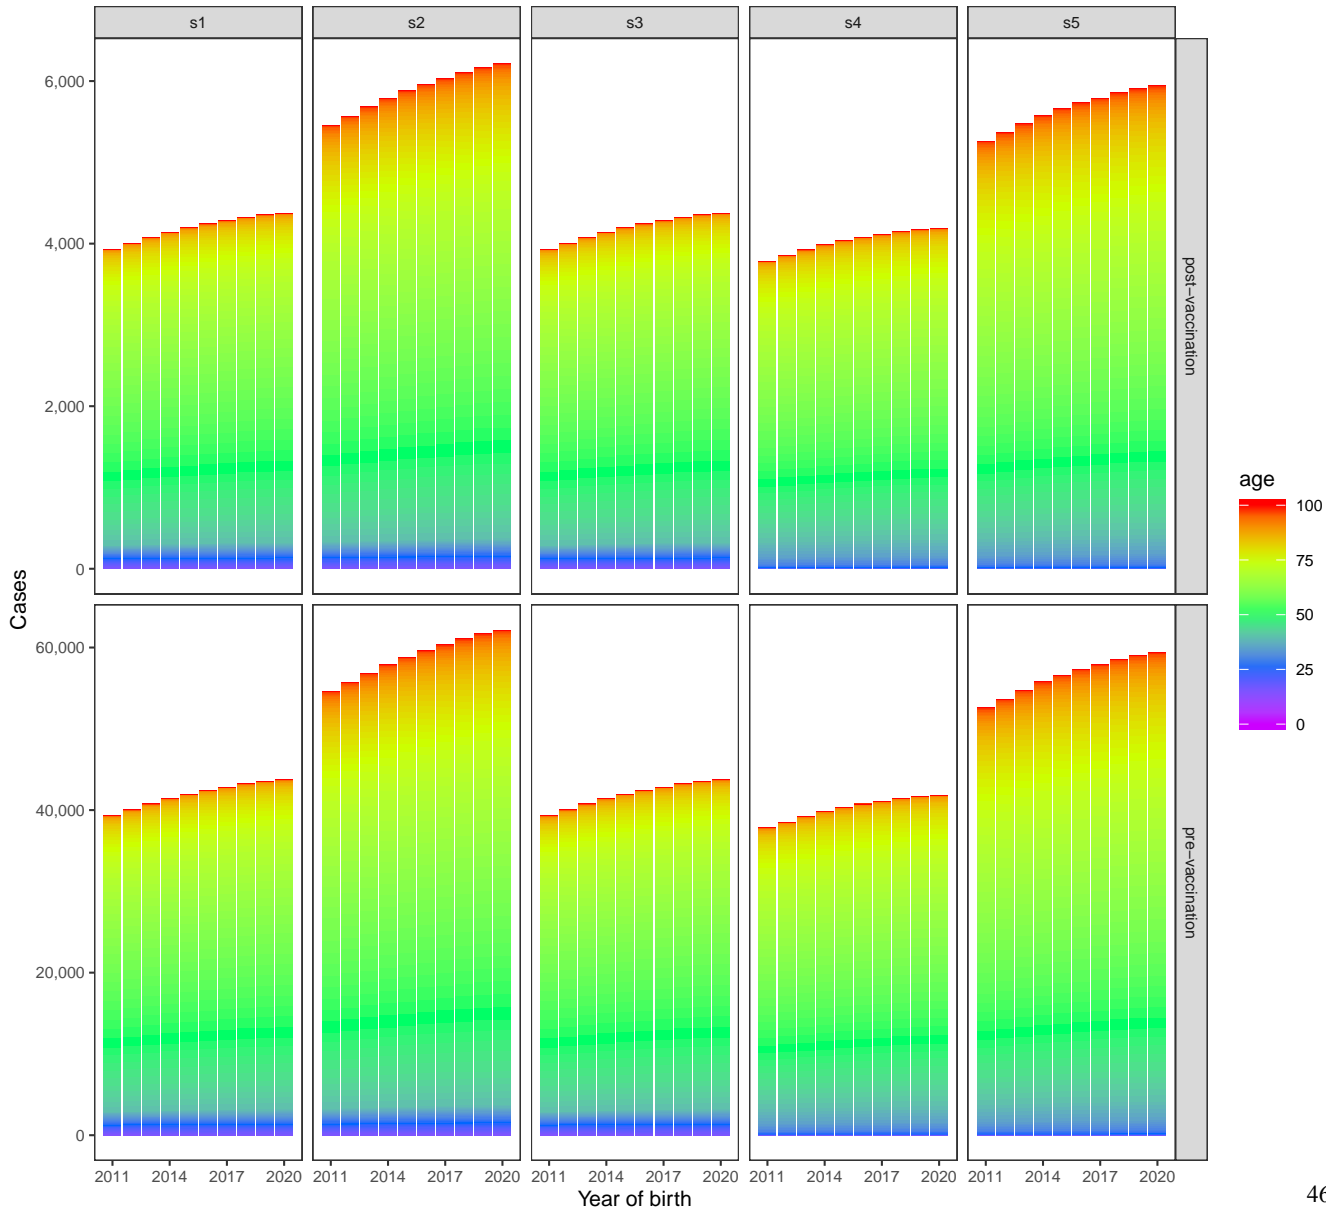

Eastern Mediterranean Region  
 Lifetime burden of cervical cancer Deaths  
 caused by HPV 16/18/31/33/45/52/58 pre- and post-vaccination  
 (vaccination age = 9 years / nonavalent vaccine)

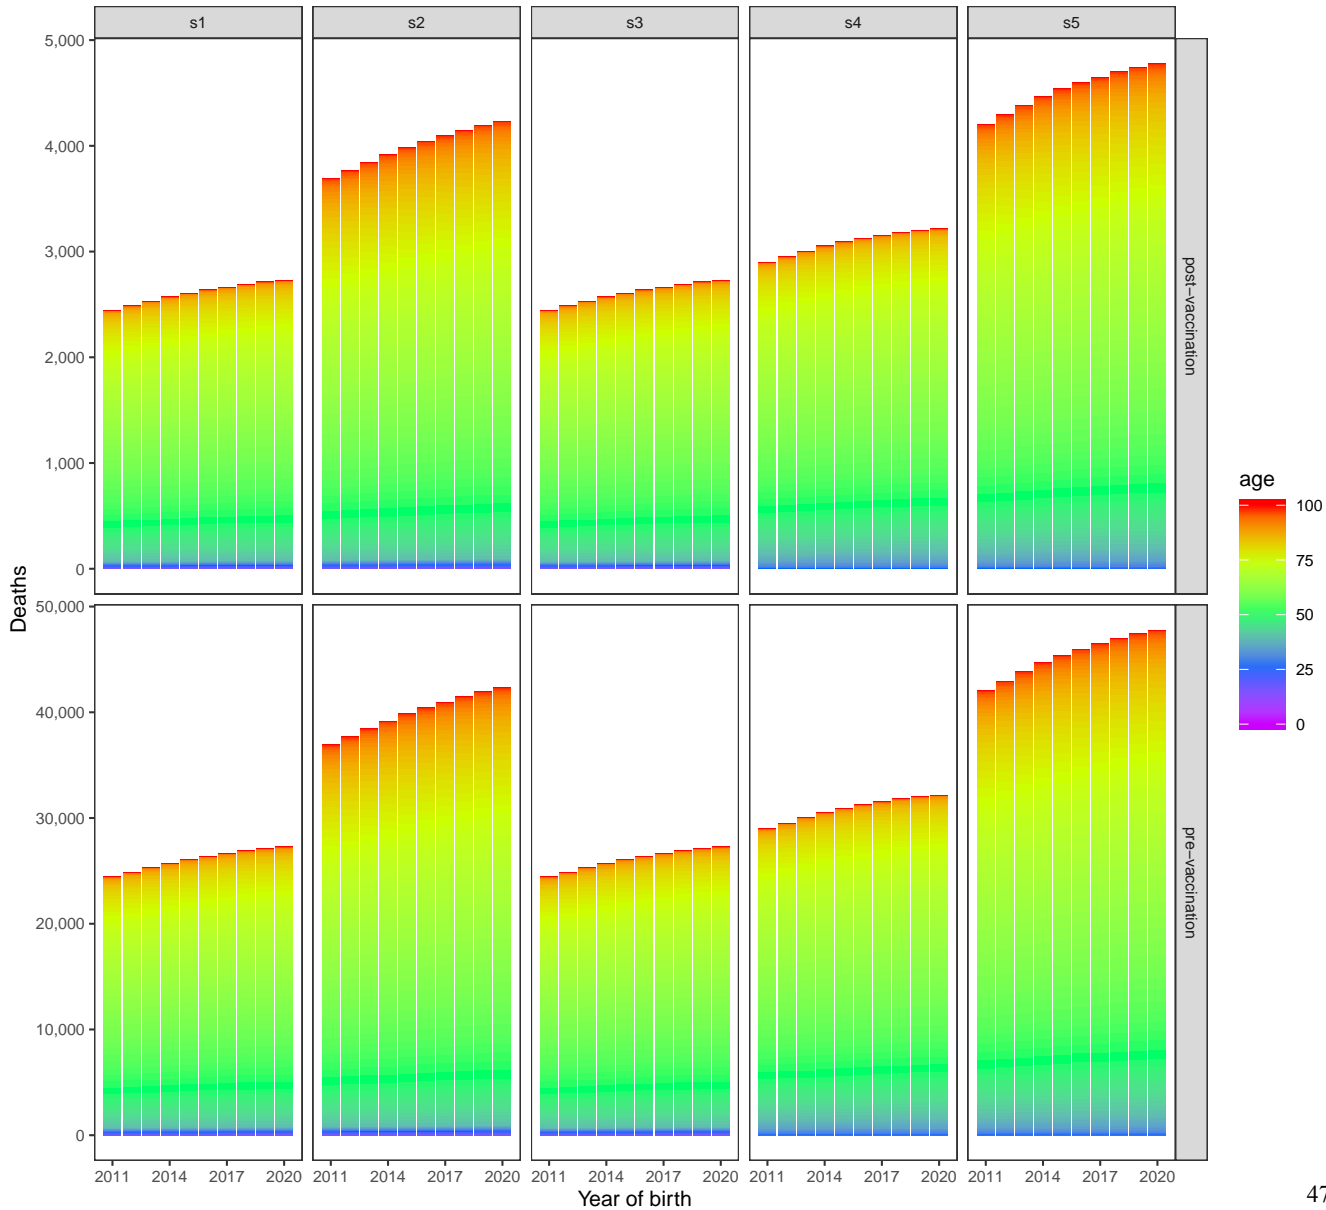

Eastern Mediterranean Region  
 Lifetime burden of cervical cancer YLDs  
 caused by HPV 16/18/31/33/45/52/58 pre- and post-vaccination  
 (vaccination age = 9 years / nonavalent vaccine)

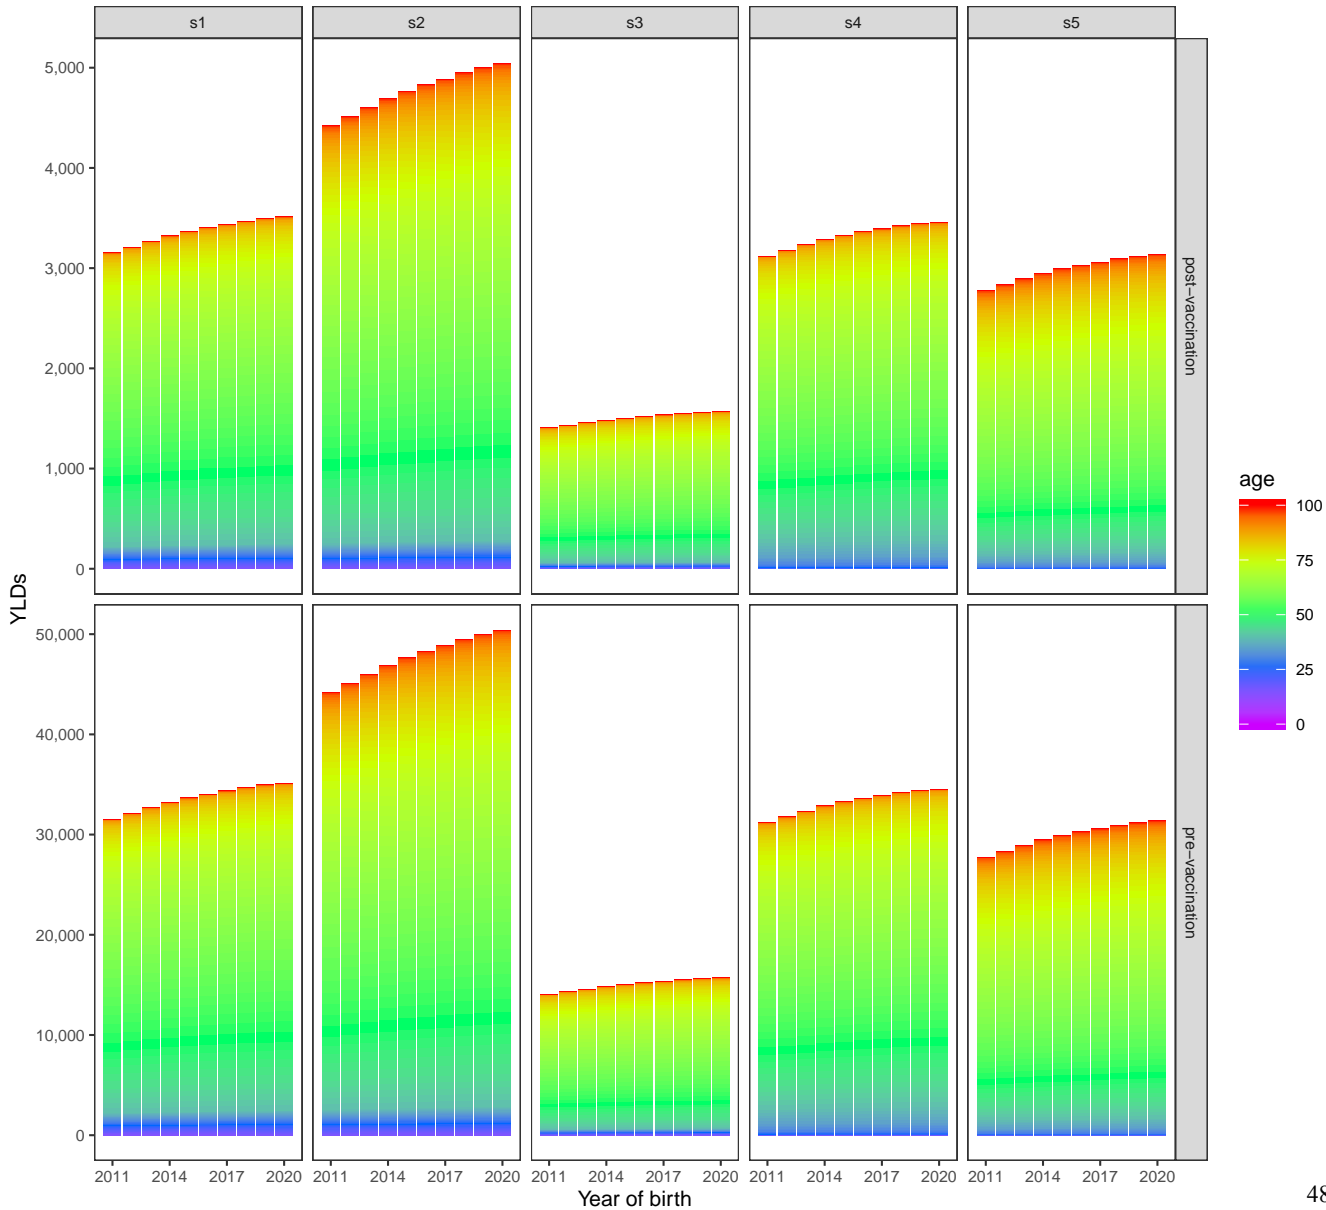

Eastern Mediterranean Region  
 Lifetime burden of cervical cancer YLLs  
 caused by HPV 16/18/31/33/45/52/58 pre- and post-vaccination  
 (vaccination age = 9 years / nonavalent vaccine)

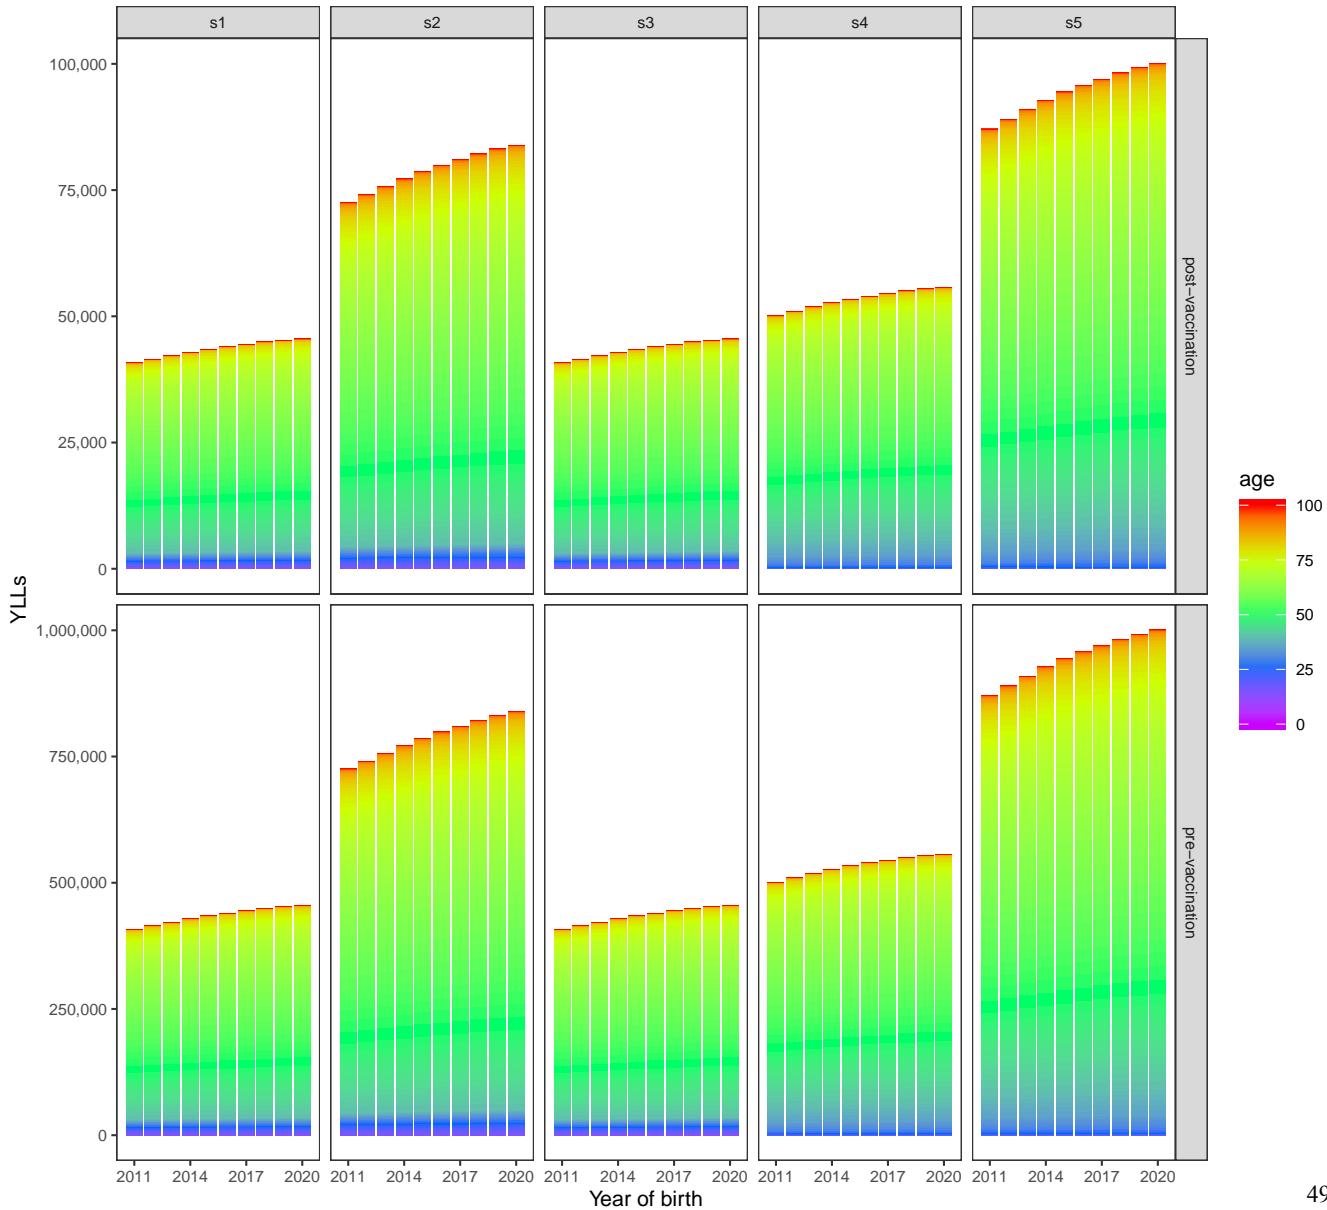



Eastern Mediterranean Region  
 Lifetime burden of cervical cancer DALYs  
 caused by HPV 16/18/31/33/45/52/58 pre- and post-vaccination  
 (vaccination age = 9 years / nonavalent vaccine)

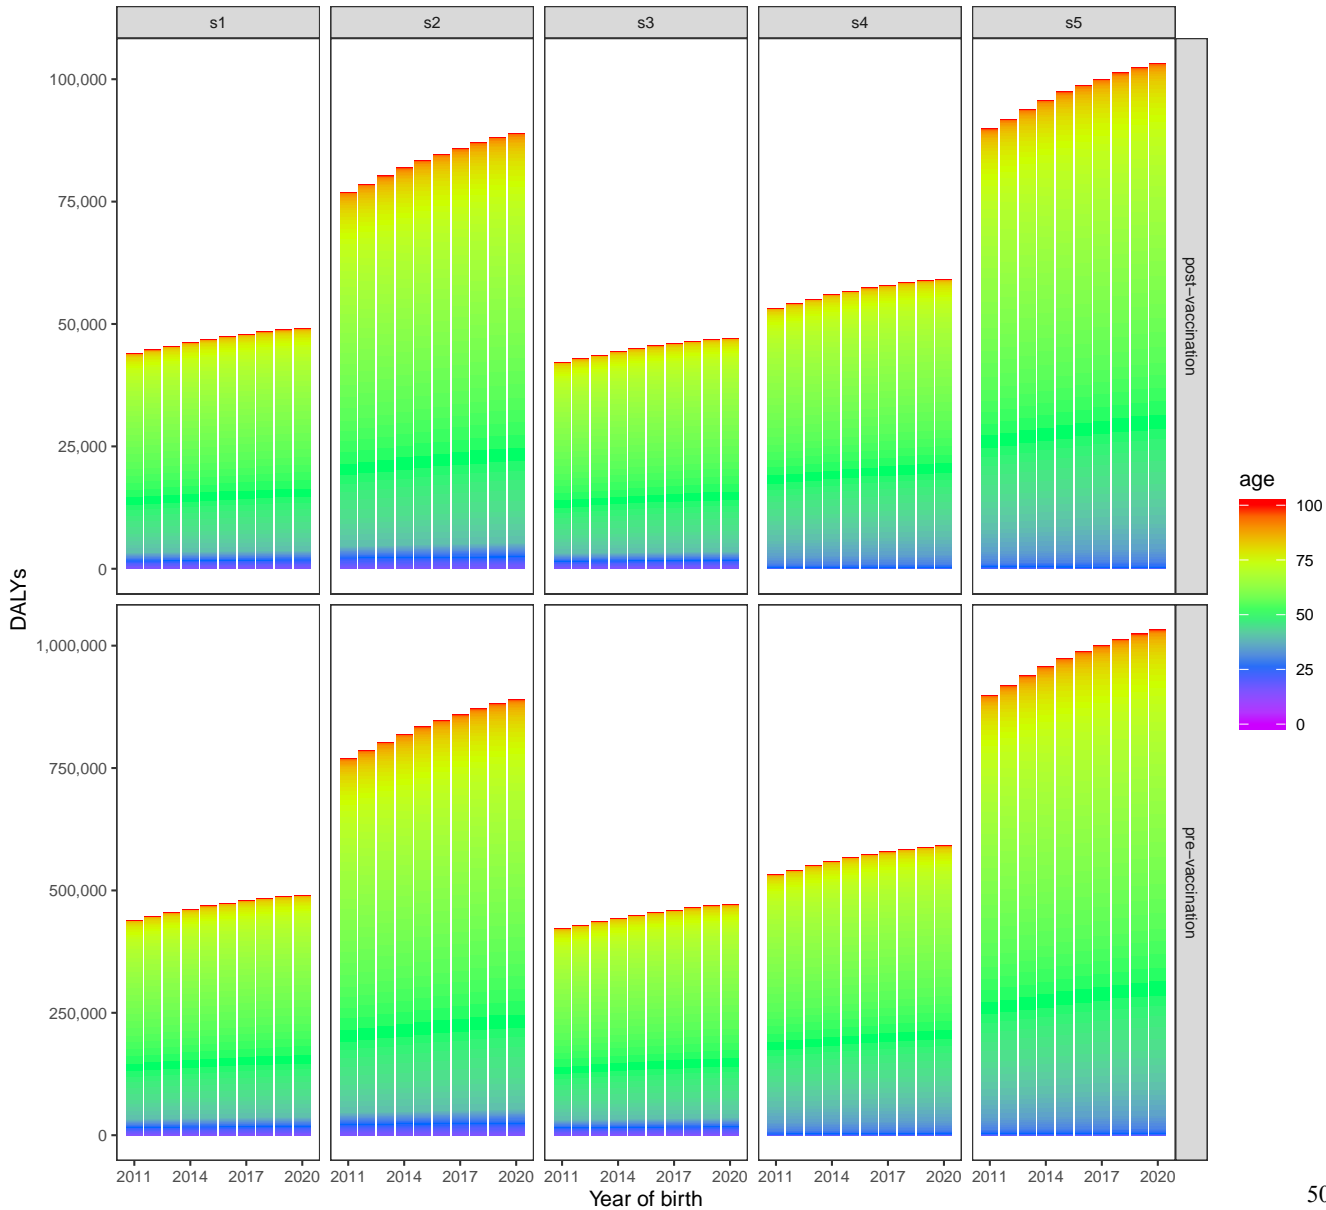

African Region  
 Lifetime burden of cervical cancer Cases  
 caused by HPV 16/18/31/33/45/52/58 pre- and post-vaccination  
 (vaccination age = 9 years / nonavalent vaccine)

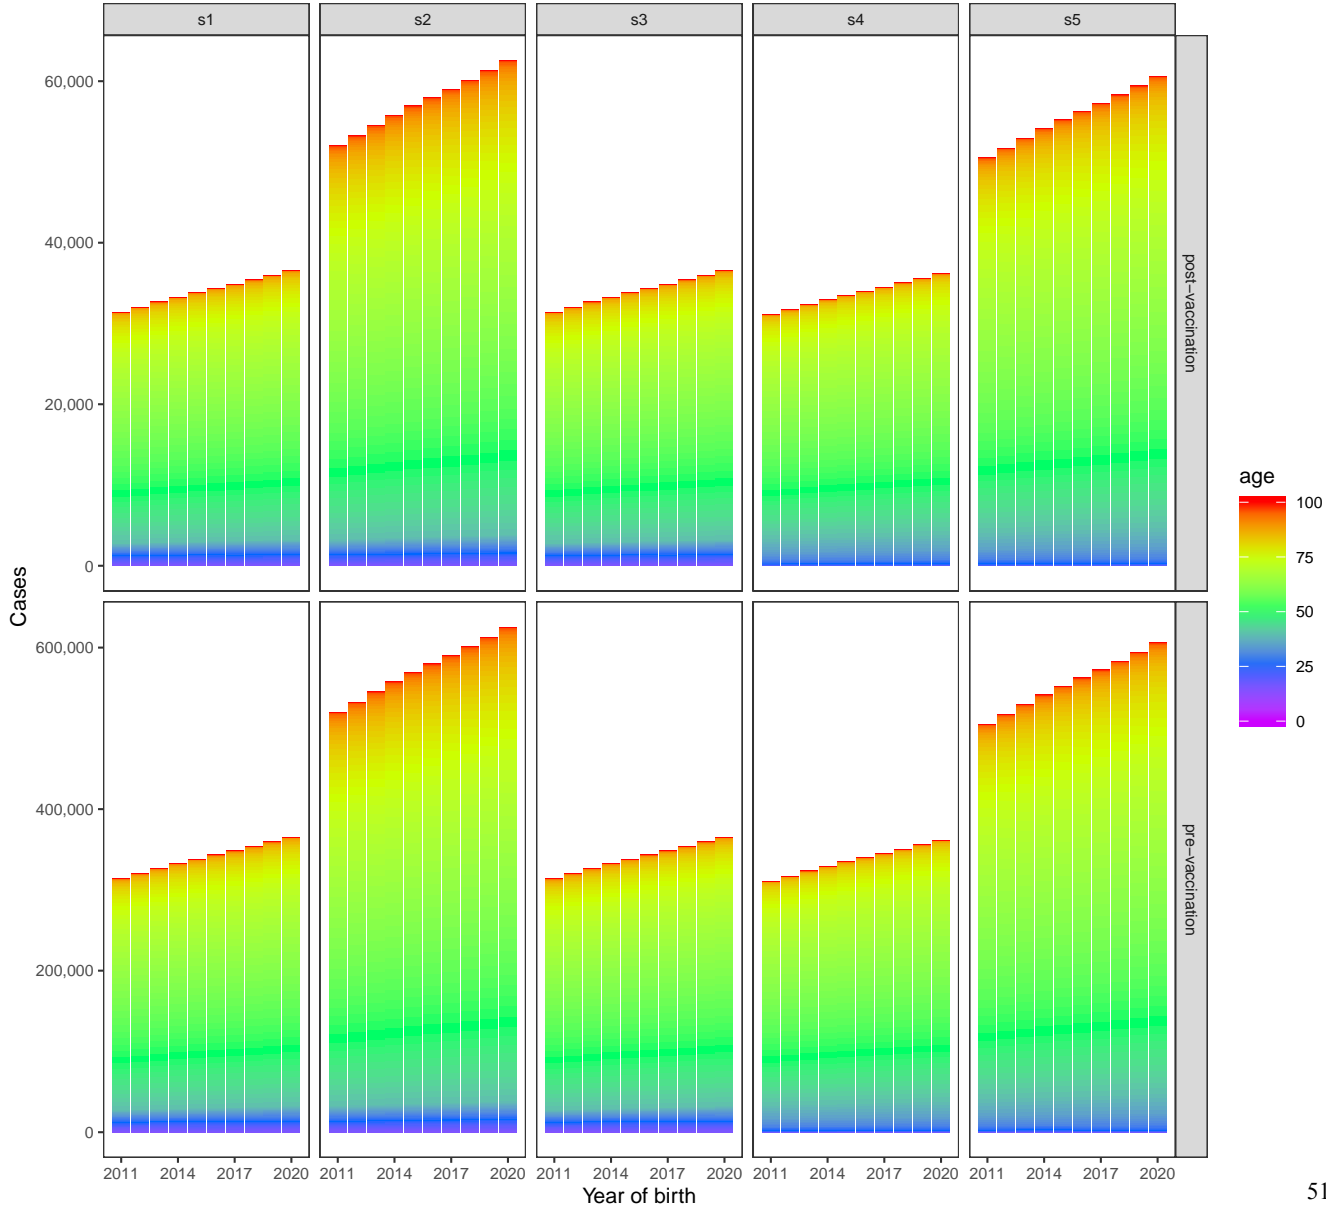

African Region  
 Lifetime burden of cervical cancer Deaths  
 caused by HPV 16/18/31/33/45/52/58 pre- and post-vaccination  
 (vaccination age = 9 years / nonavalent vaccine)

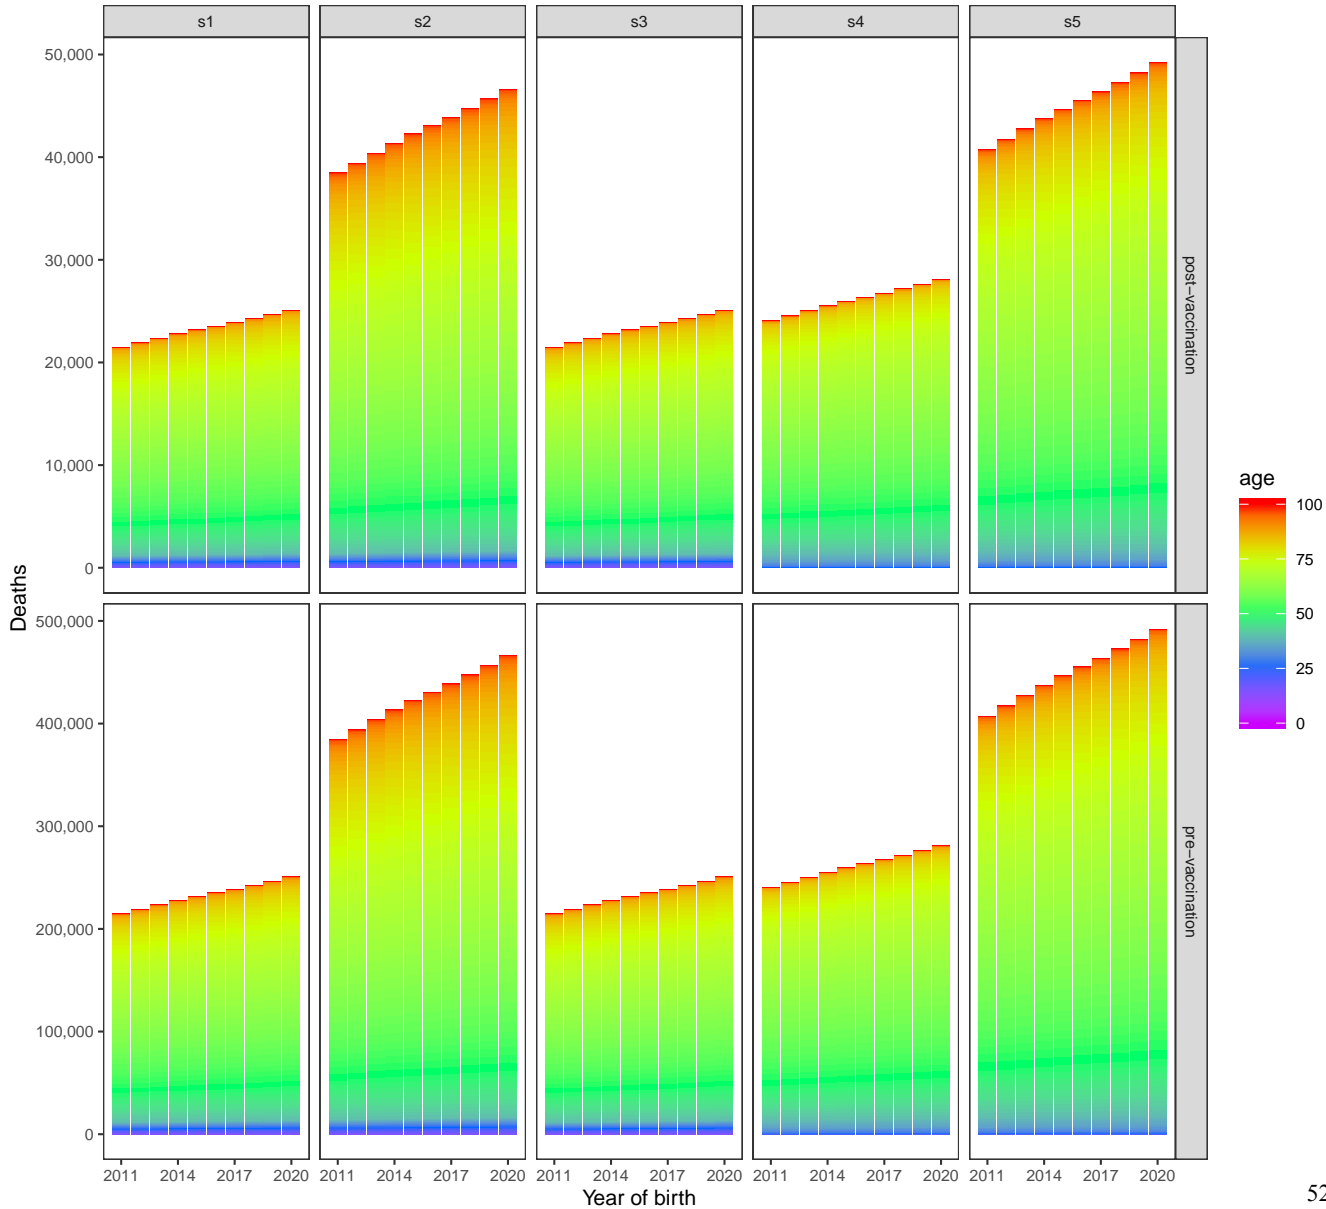

African Region  
 Lifetime burden of cervical cancer YLDs  
 caused by HPV 16/18/31/33/45/52/58 pre- and post-vaccination  
 (vaccination age = 9 years / nonavalent vaccine)

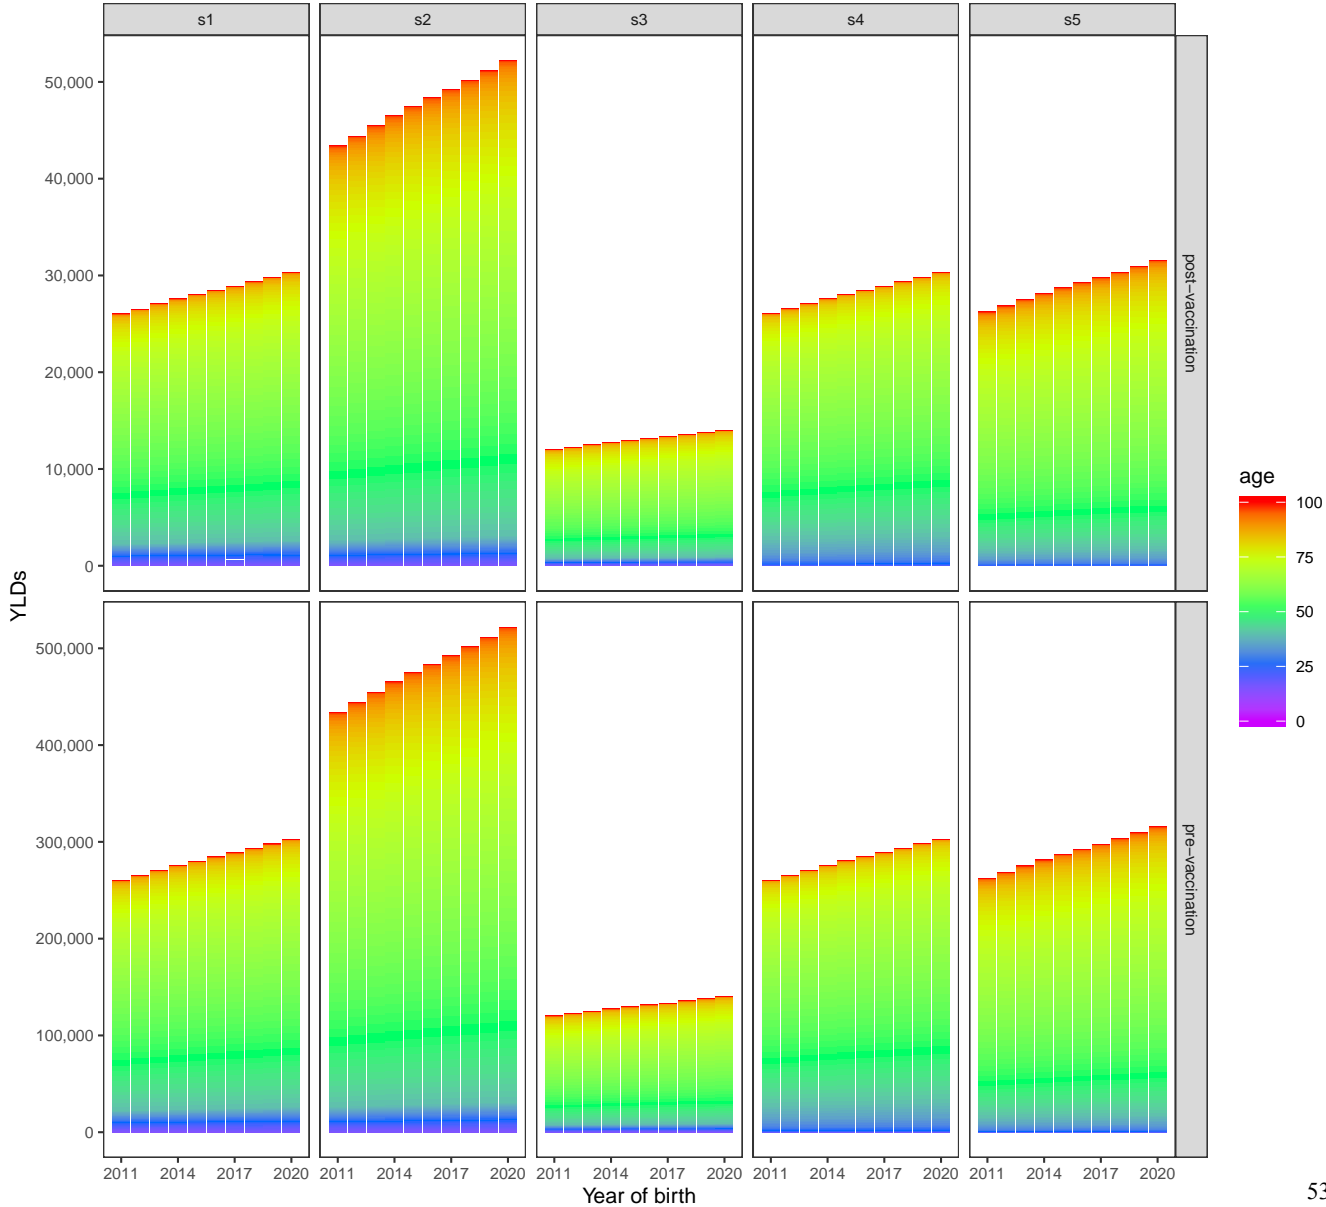

African Region  
 Lifetime burden of cervical cancer YLLs  
 caused by HPV 16/18/31/33/45/52/58 pre- and post-vaccination  
 (vaccination age = 9 years / nonavalent vaccine)

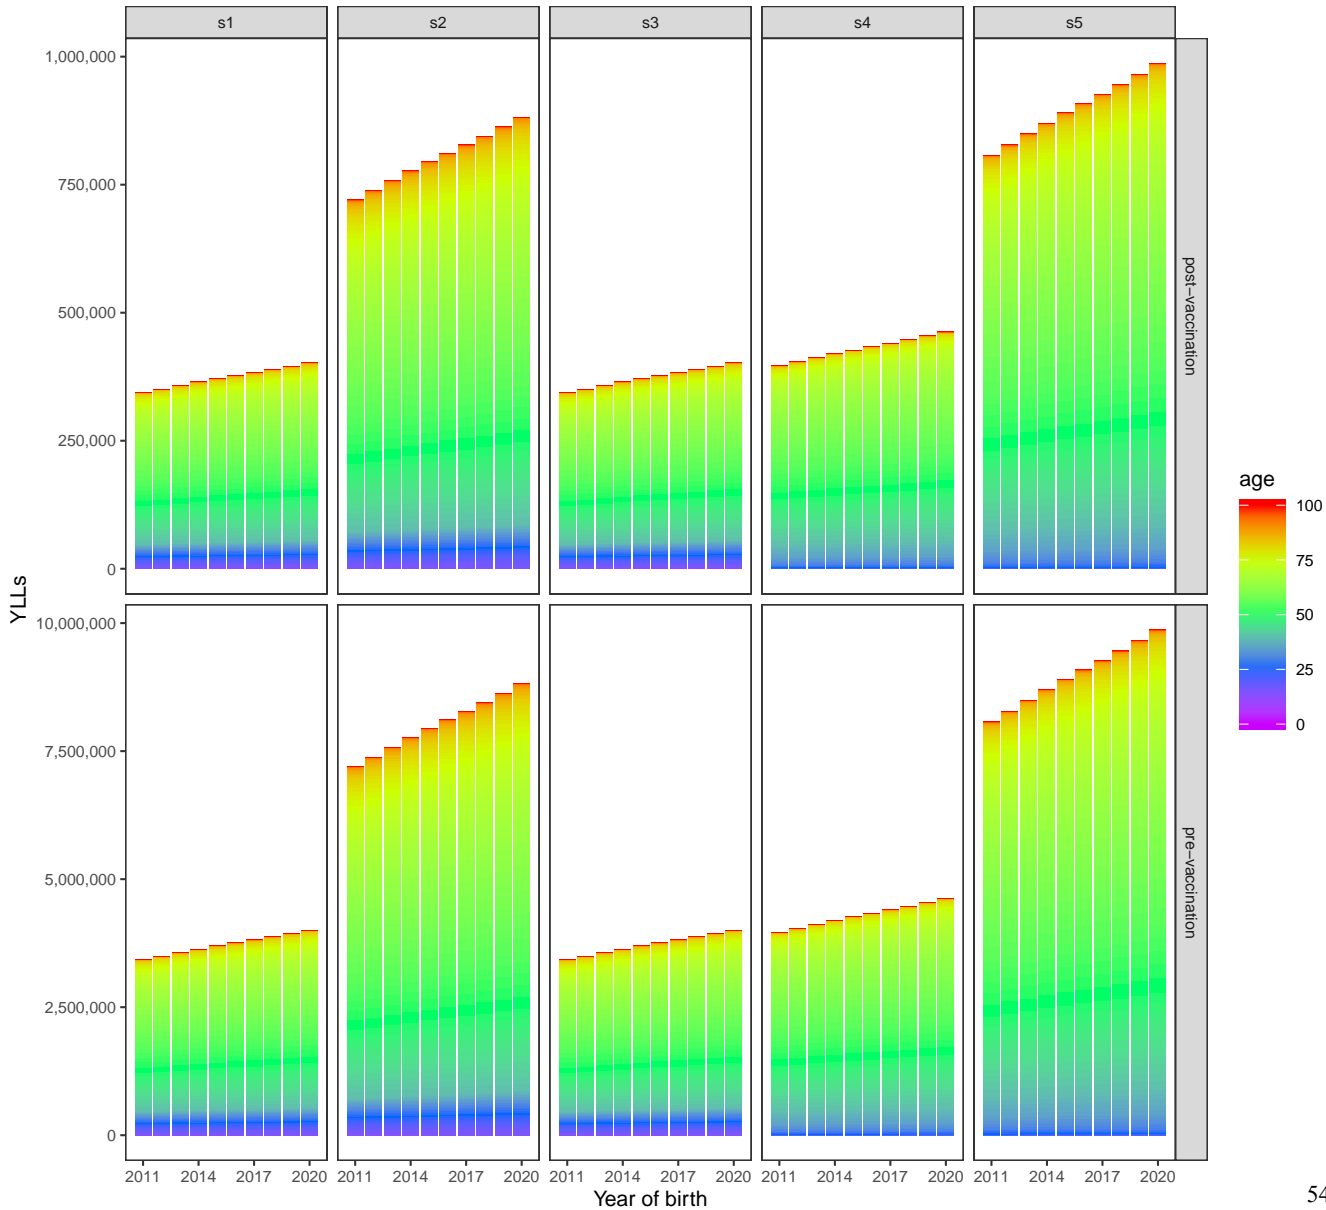

African Region  
 Lifetime burden of cervical cancer DALYs  
 caused by HPV 16/18/31/33/45/52/58 pre- and post-vaccination  
 (vaccination age = 9 years / nonavalent vaccine)

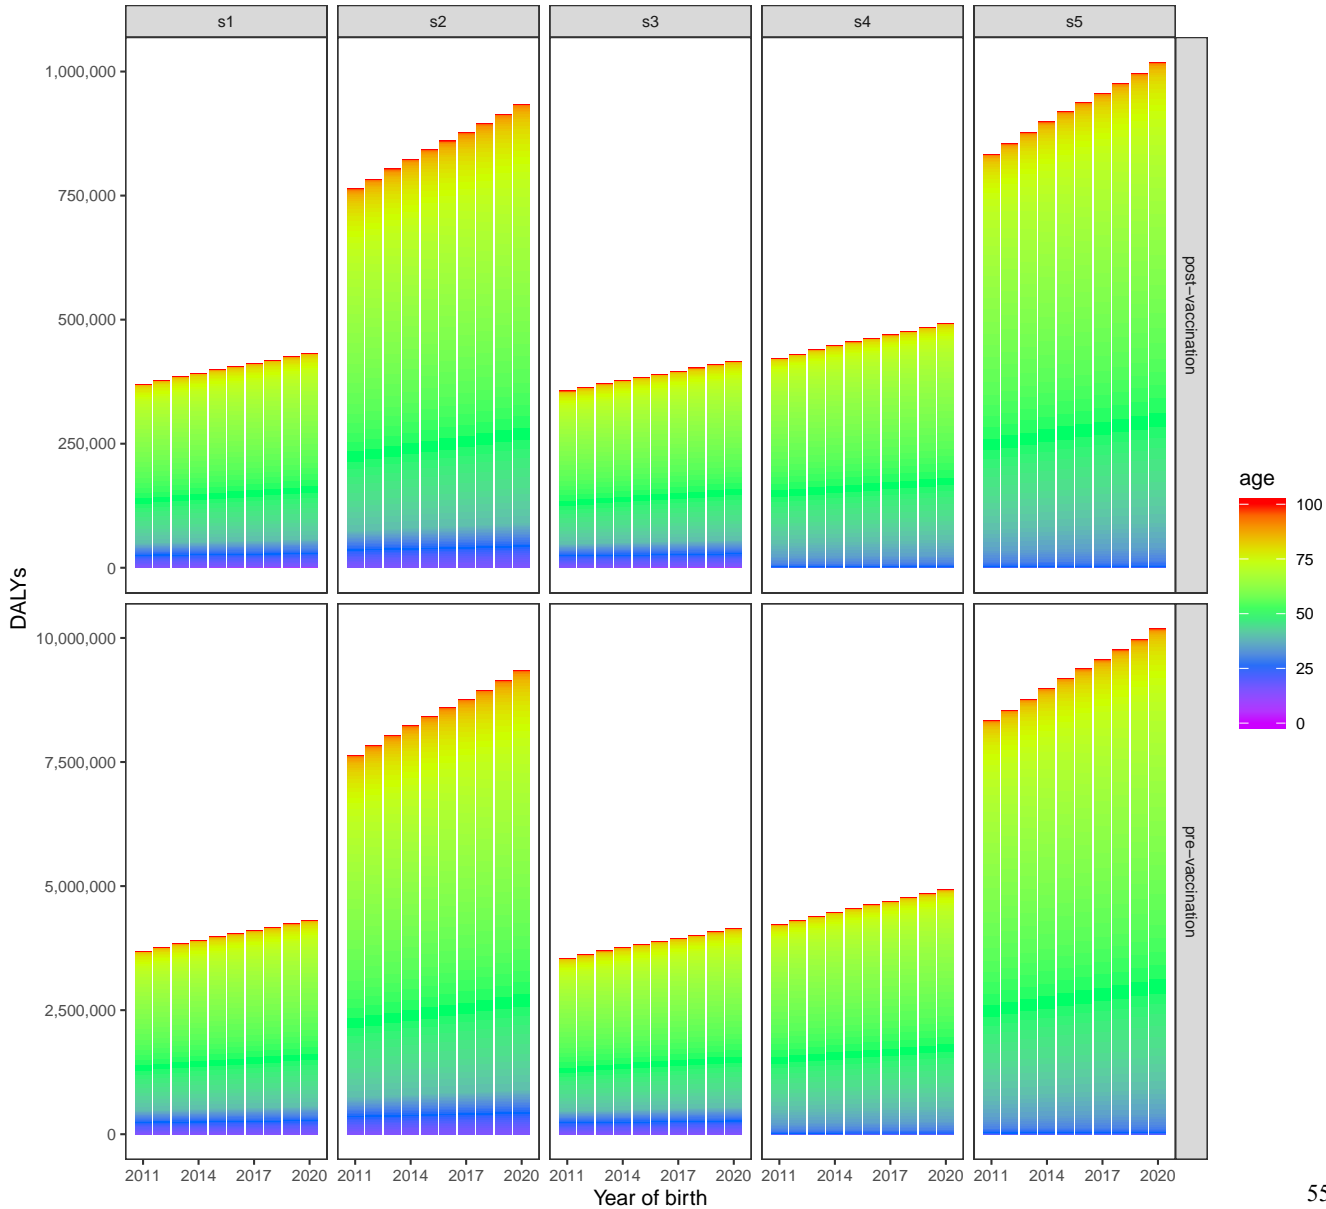

European Region  
 Lifetime burden of cervical cancer Cases  
 caused by HPV 16/18/31/33/45/52/58 pre- and post-vaccination  
 (vaccination age = 9 years / nonavalent vaccine)

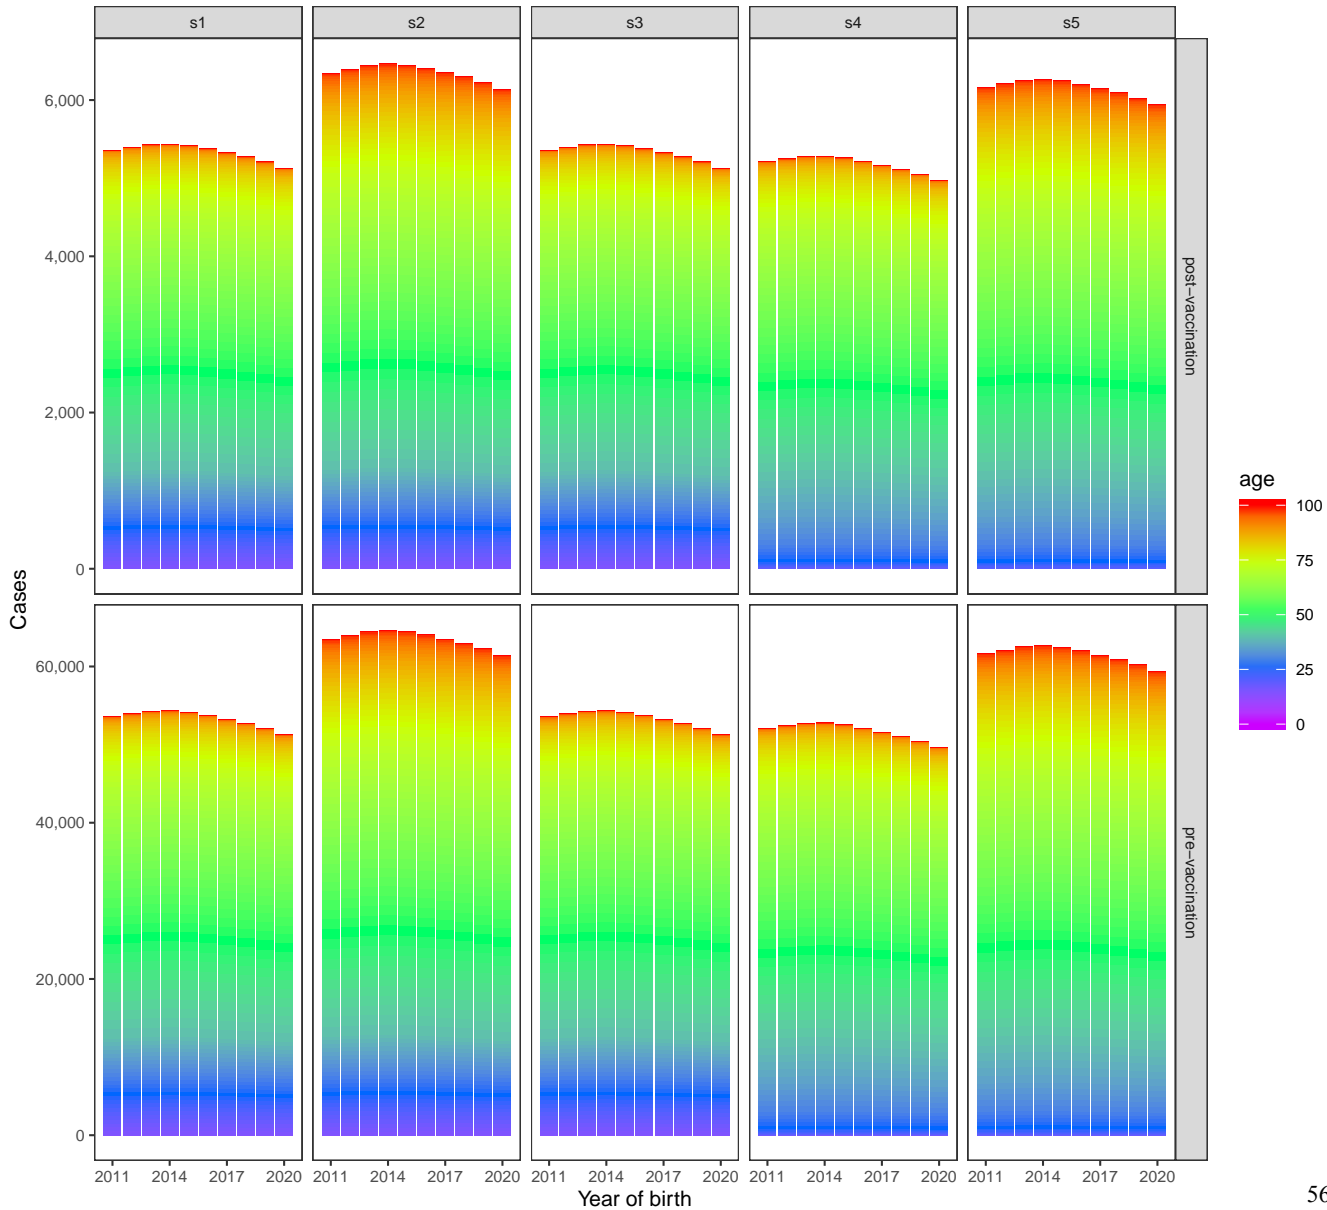

European Region  
 Lifetime burden of cervical cancer Deaths  
 caused by HPV 16/18/31/33/45/52/58 pre- and post-vaccination  
 (vaccination age = 9 years / nonavalent vaccine)

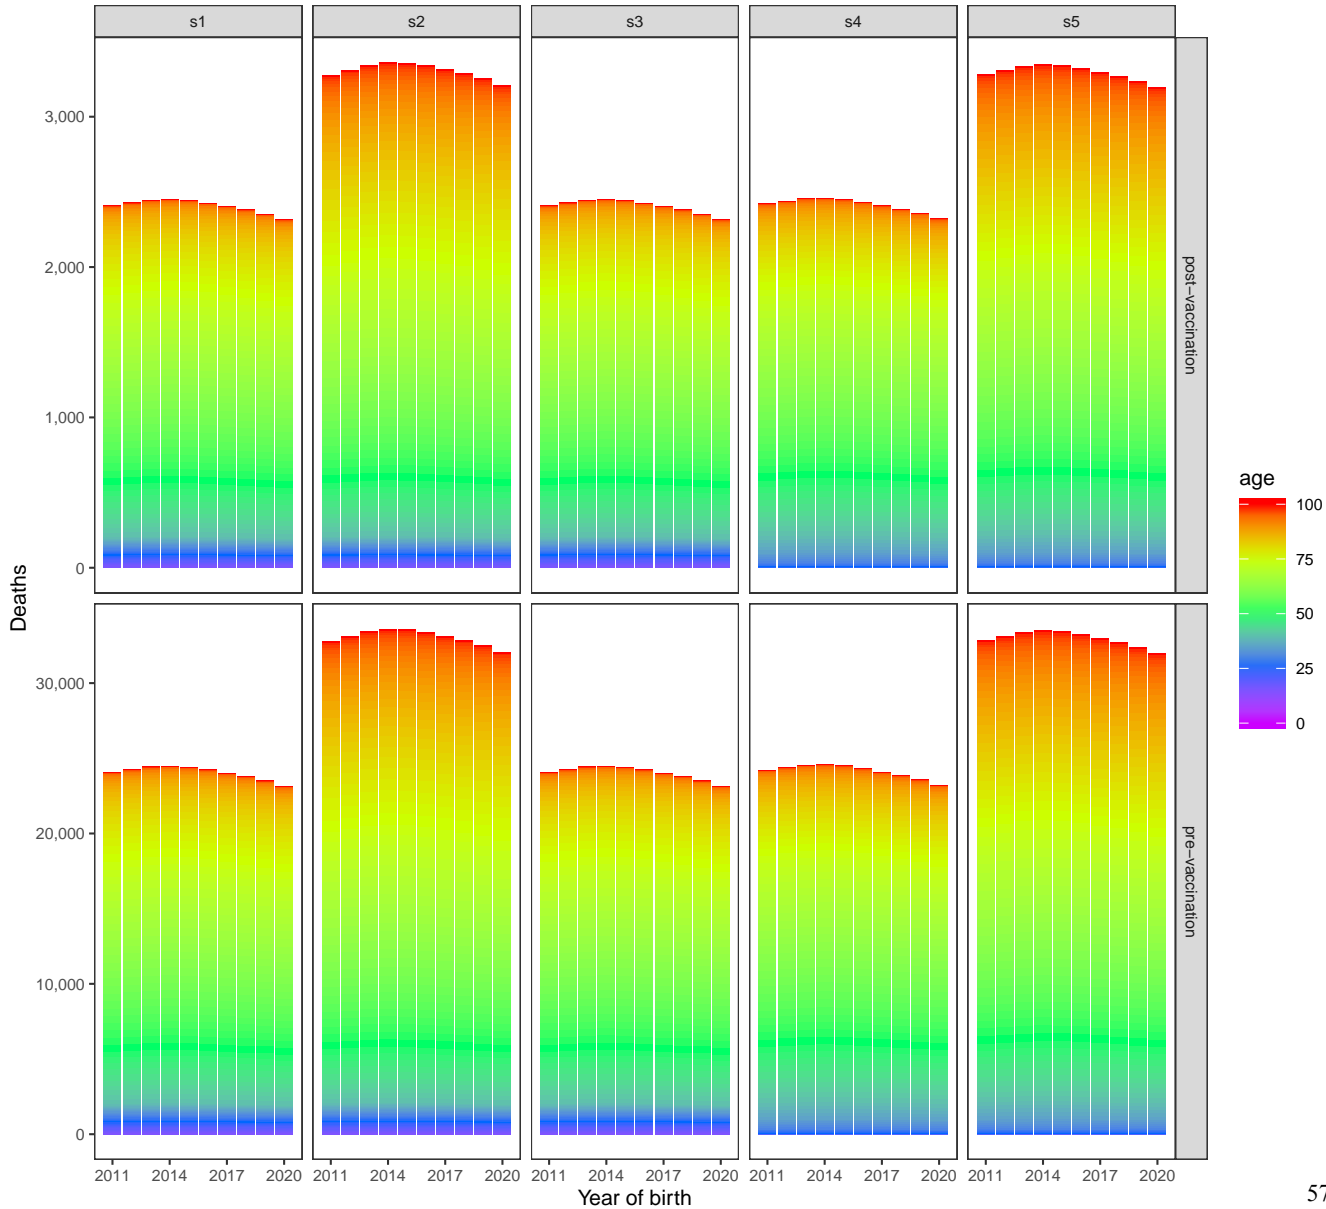



European Region  
 Lifetime burden of cervical cancer YLDs  
 caused by HPV 16/18/31/33/45/52/58 pre- and post-vaccination  
 (vaccination age = 9 years / nonavalent vaccine)

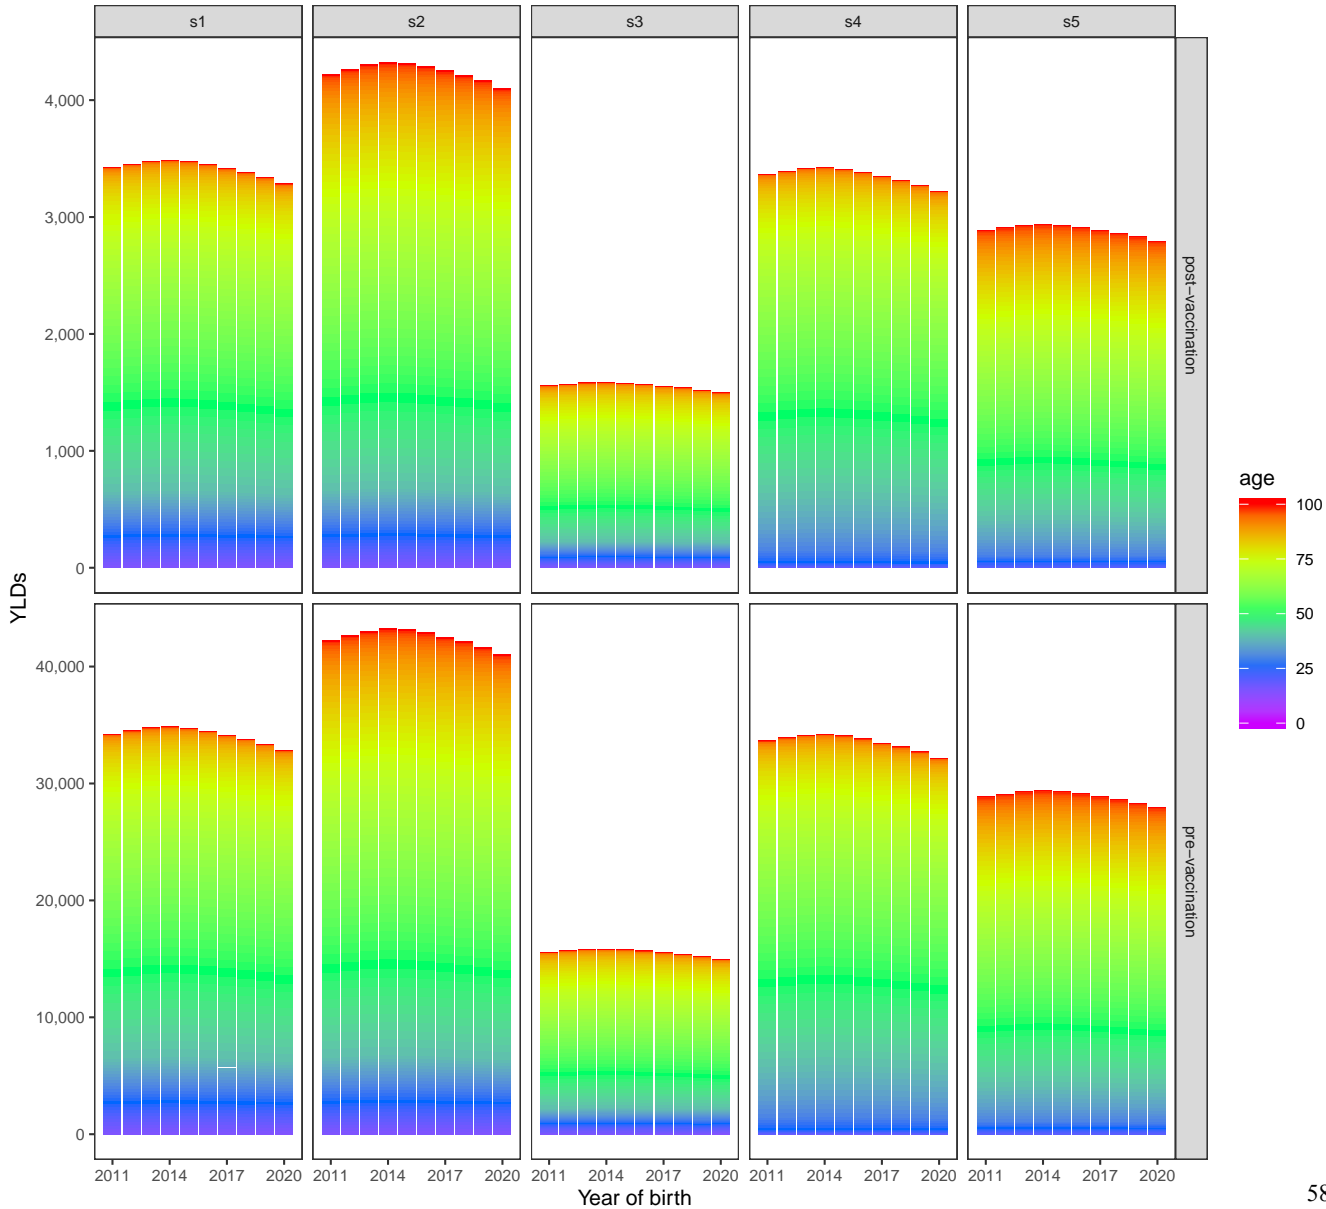

European Region  
 Lifetime burden of cervical cancer YLLs  
 caused by HPV 16/18/31/33/45/52/58 pre- and post-vaccination  
 (vaccination age = 9 years / nonavalent vaccine)

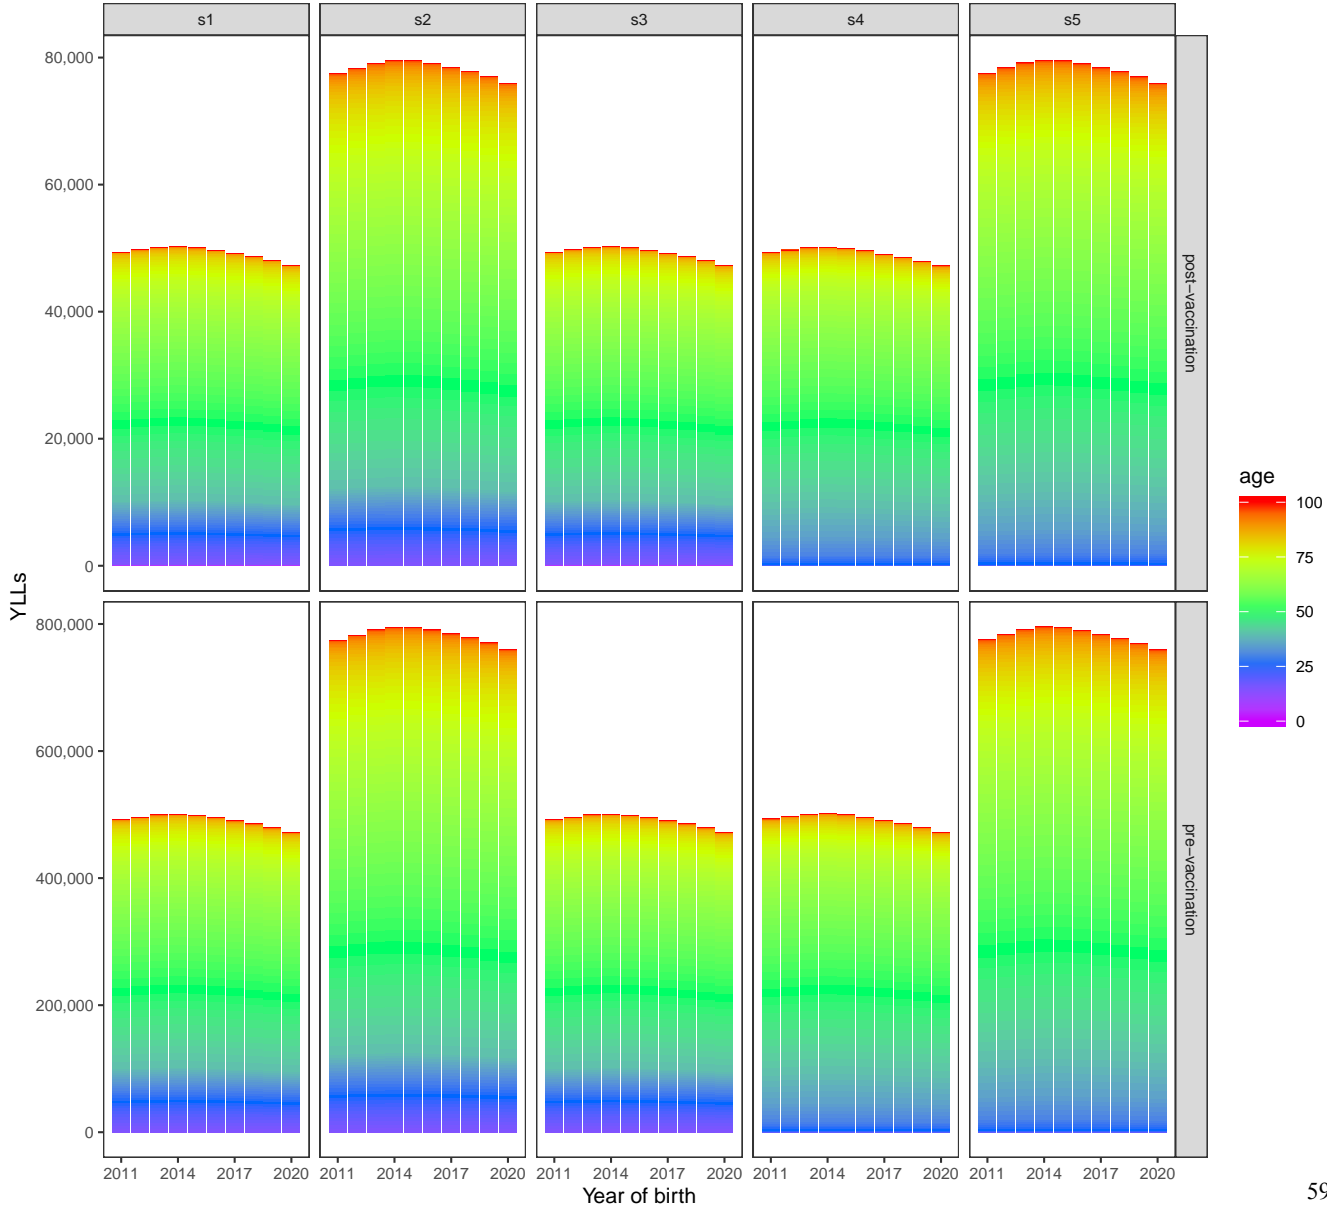

European Region  
 Lifetime burden of cervical cancer DALYs  
 caused by HPV 16/18/31/33/45/52/58 pre- and post-vaccination  
 (vaccination age = 9 years / nonavalent vaccine)

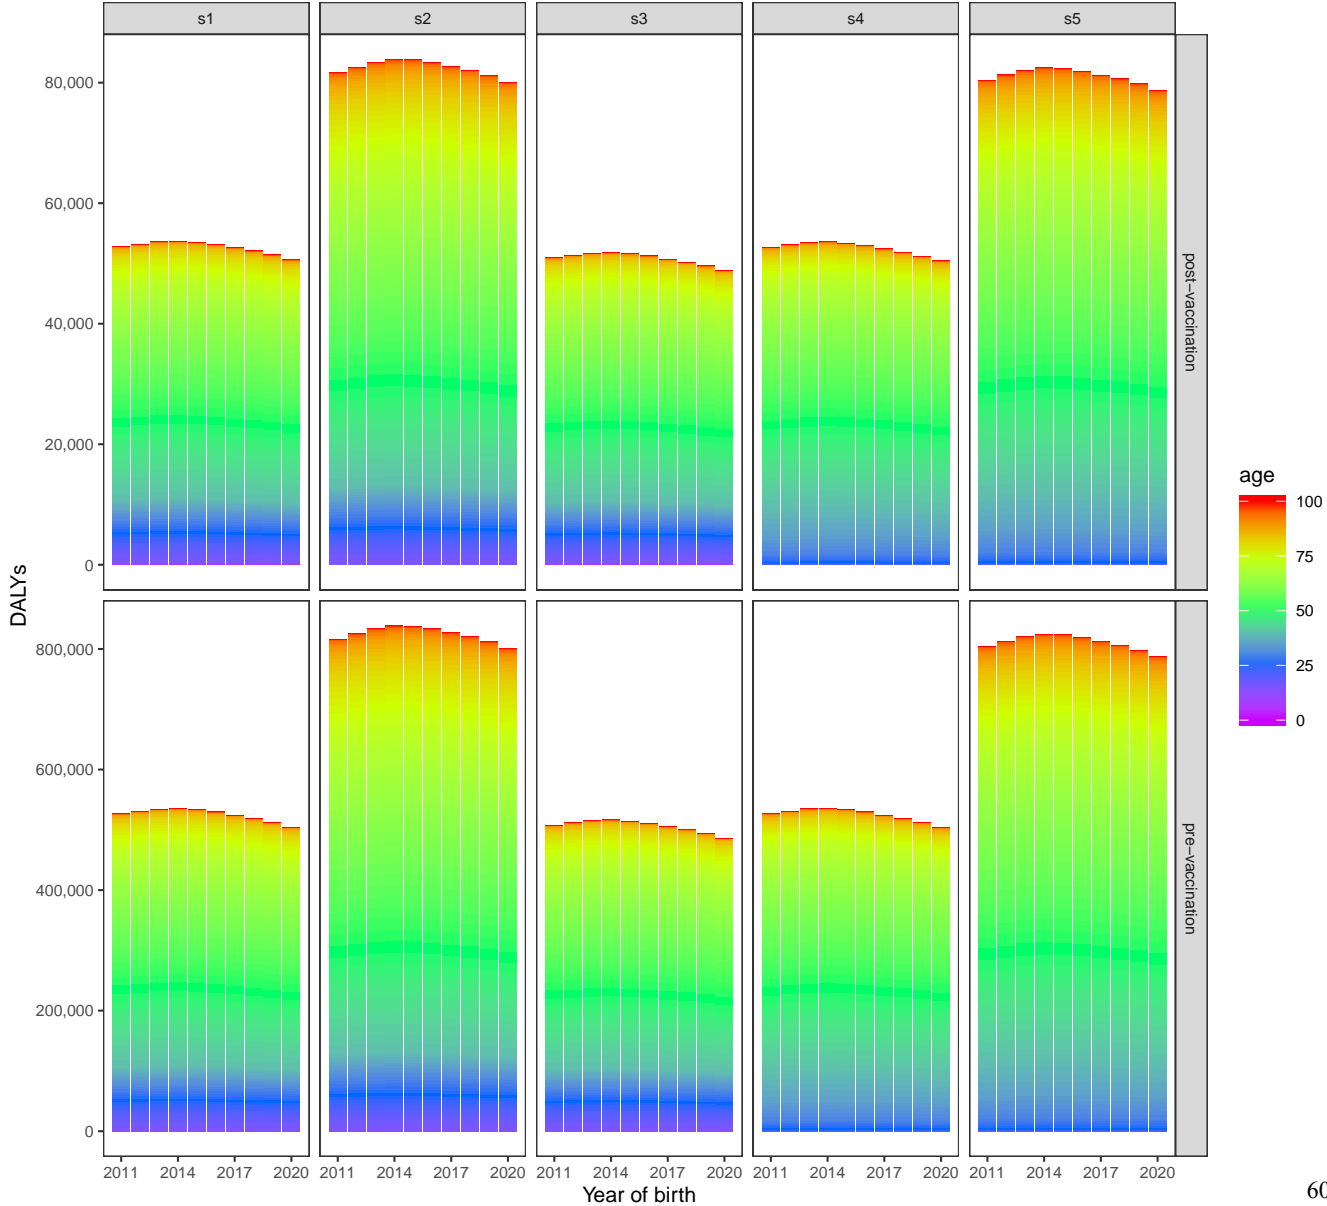

Region of the Americas  
 Lifetime burden of cervical cancer Cases  
 caused by HPV 16/18/31/33/45/52/58 pre- and post-vaccination  
 (vaccination age = 9 years / nonavalent vaccine)

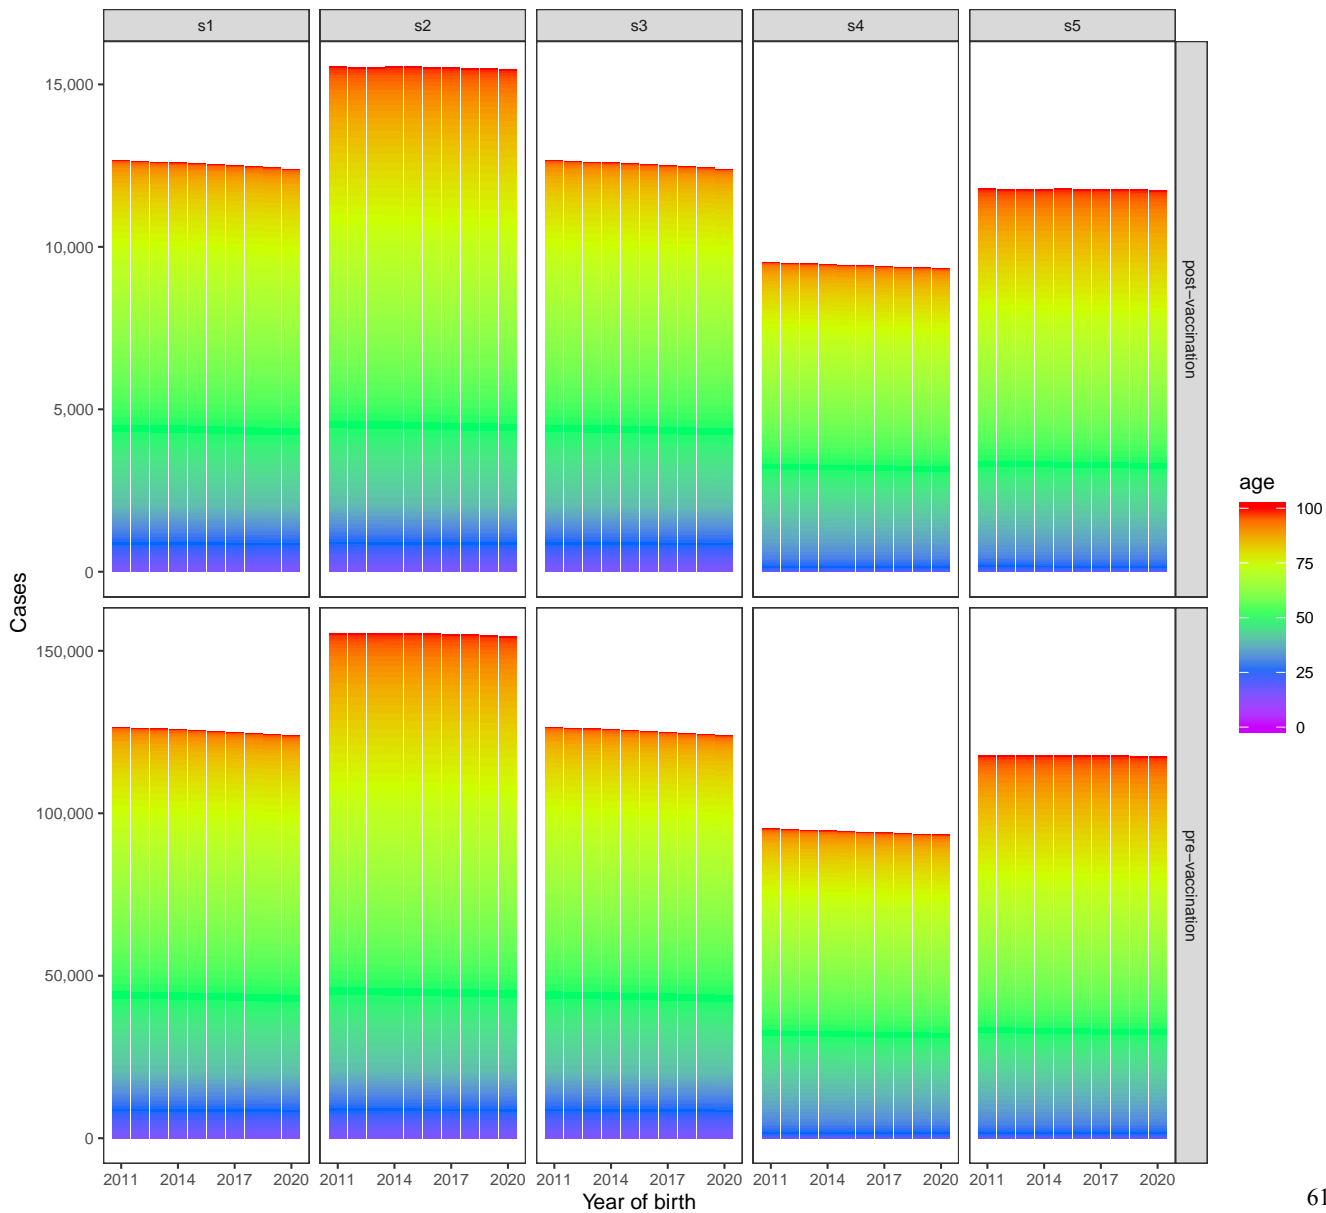

Region of the Americas  
 Lifetime burden of cervical cancer Deaths  
 caused by HPV 16/18/31/33/45/52/58 pre- and post-vaccination  
 (vaccination age = 9 years / nonavalent vaccine)

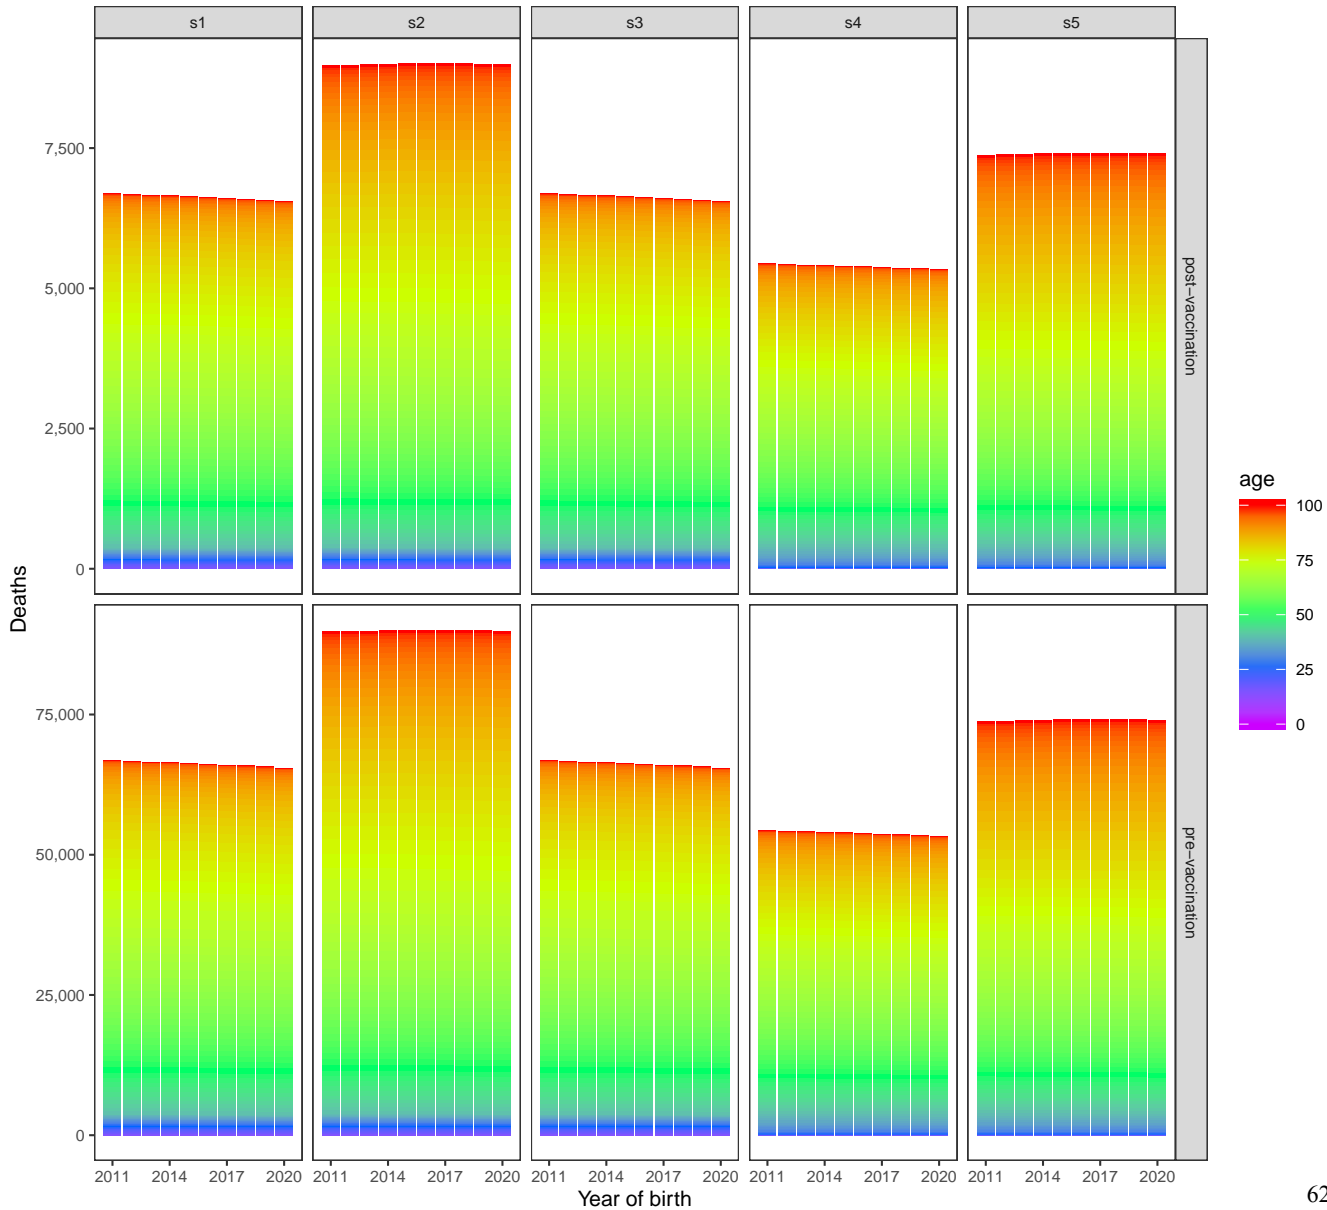

Region of the Americas  
 Lifetime burden of cervical cancer YLDs  
 caused by HPV 16/18/31/33/45/52/58 pre- and post-vaccination  
 (vaccination age = 9 years / nonavalent vaccine)

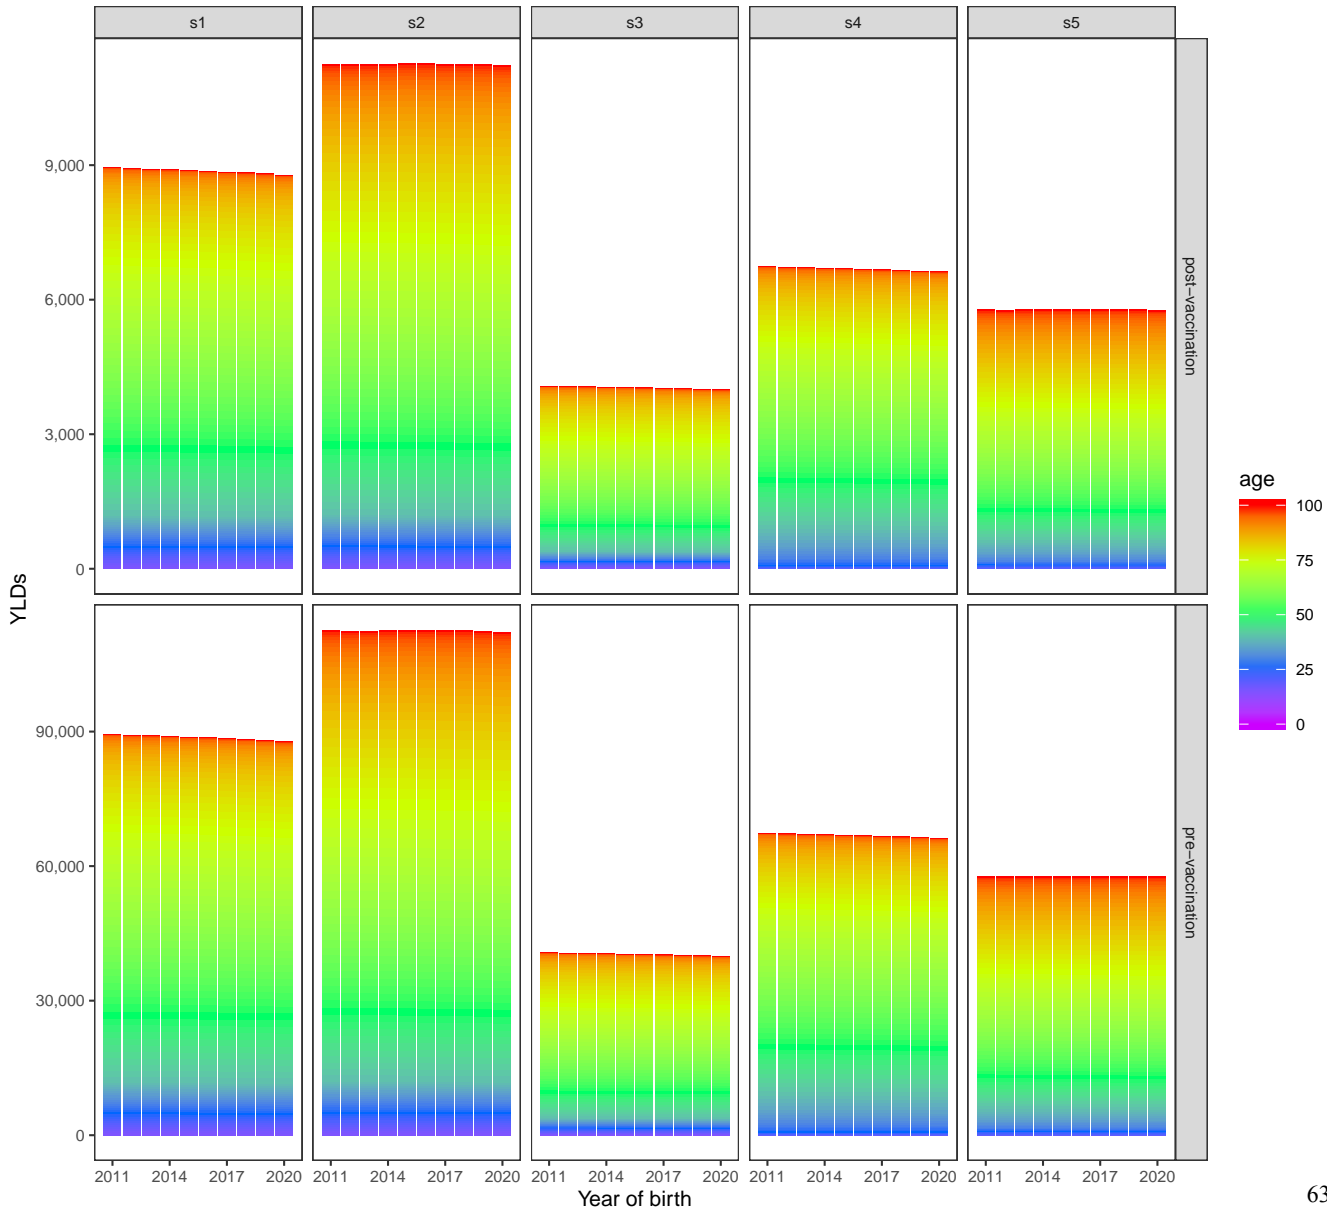

Region of the Americas  
 Lifetime burden of cervical cancer YLLs  
 caused by HPV 16/18/31/33/45/52/58 pre- and post-vaccination  
 (vaccination age = 9 years / nonavalent vaccine)

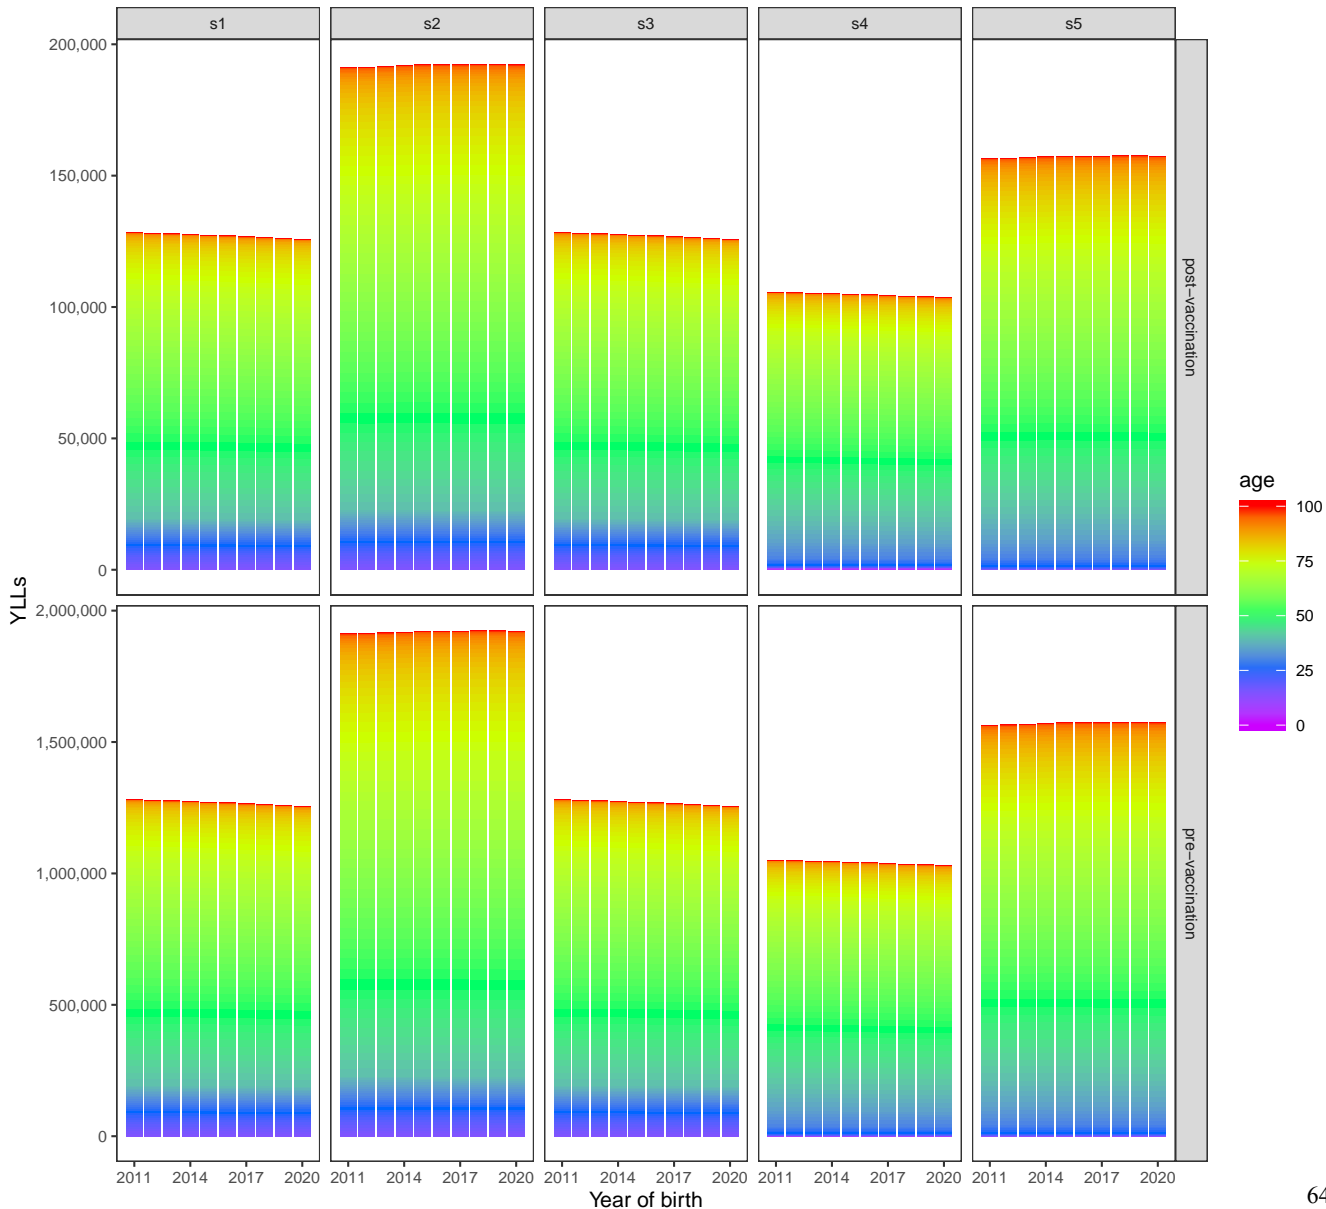

Region of the Americas  
 Lifetime burden of cervical cancer DALYs  
 caused by HPV 16/18/31/33/45/52/58 pre- and post-vaccination  
 (vaccination age = 9 years / nonavalent vaccine)

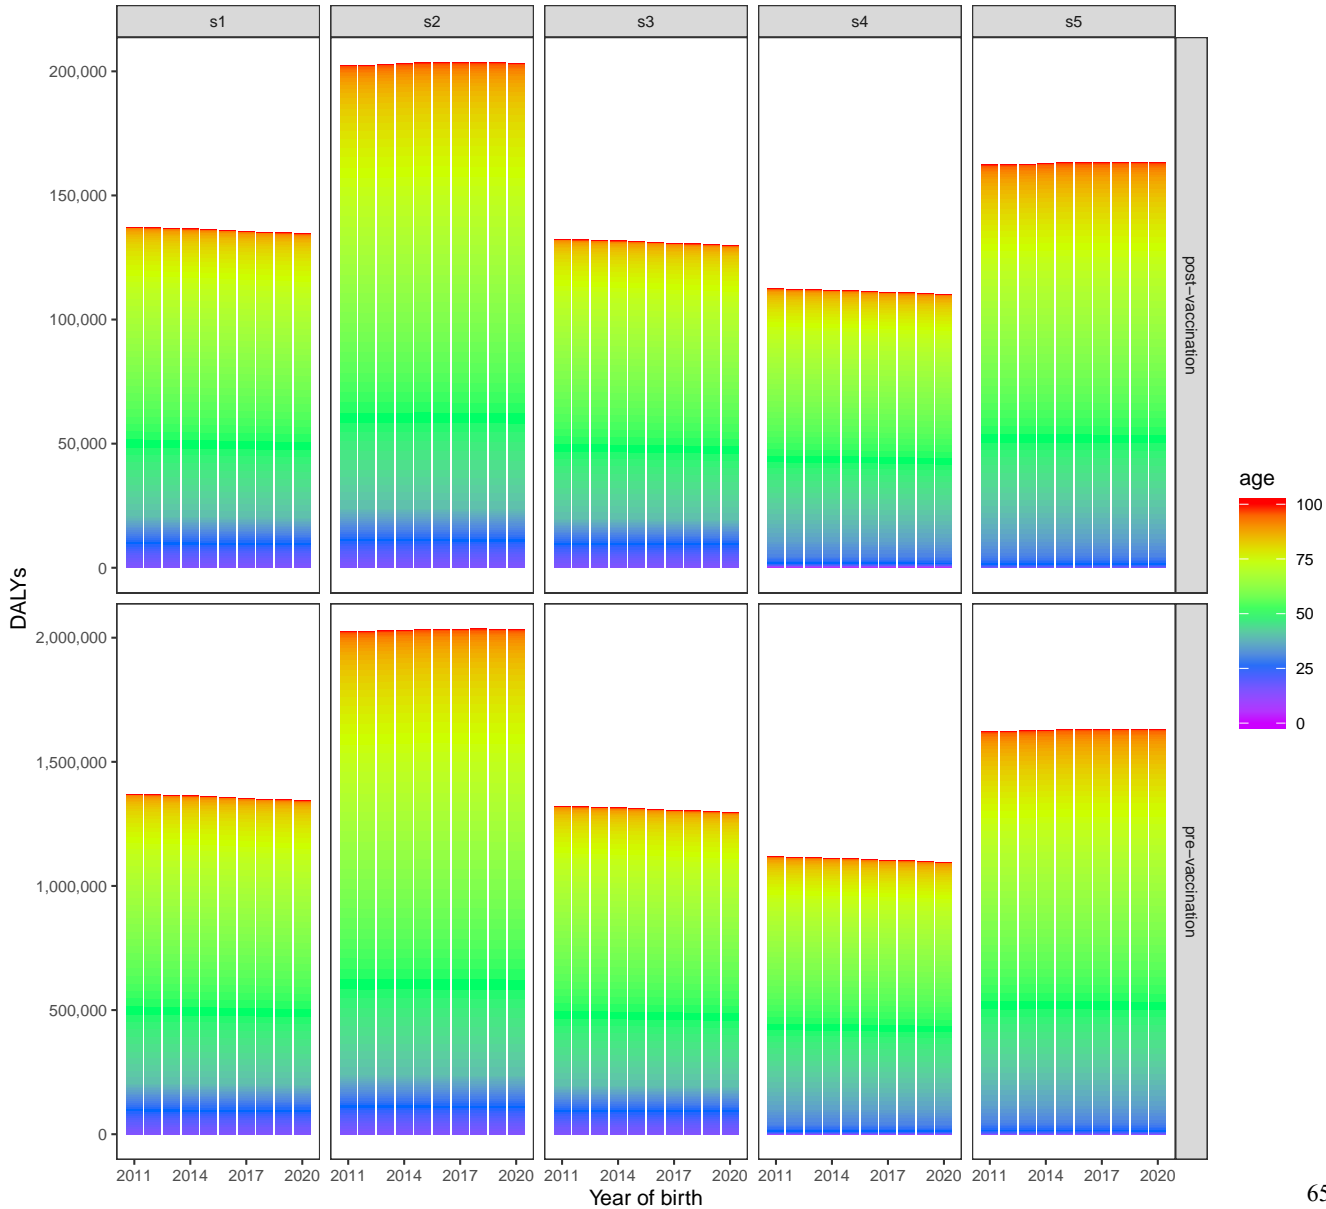



Western Pacific Region  
 Lifetime burden of cervical cancer Cases  
 caused by HPV 16/18/31/33/45/52/58 pre- and post-vaccination  
 (vaccination age = 9 years / nonavalent vaccine)

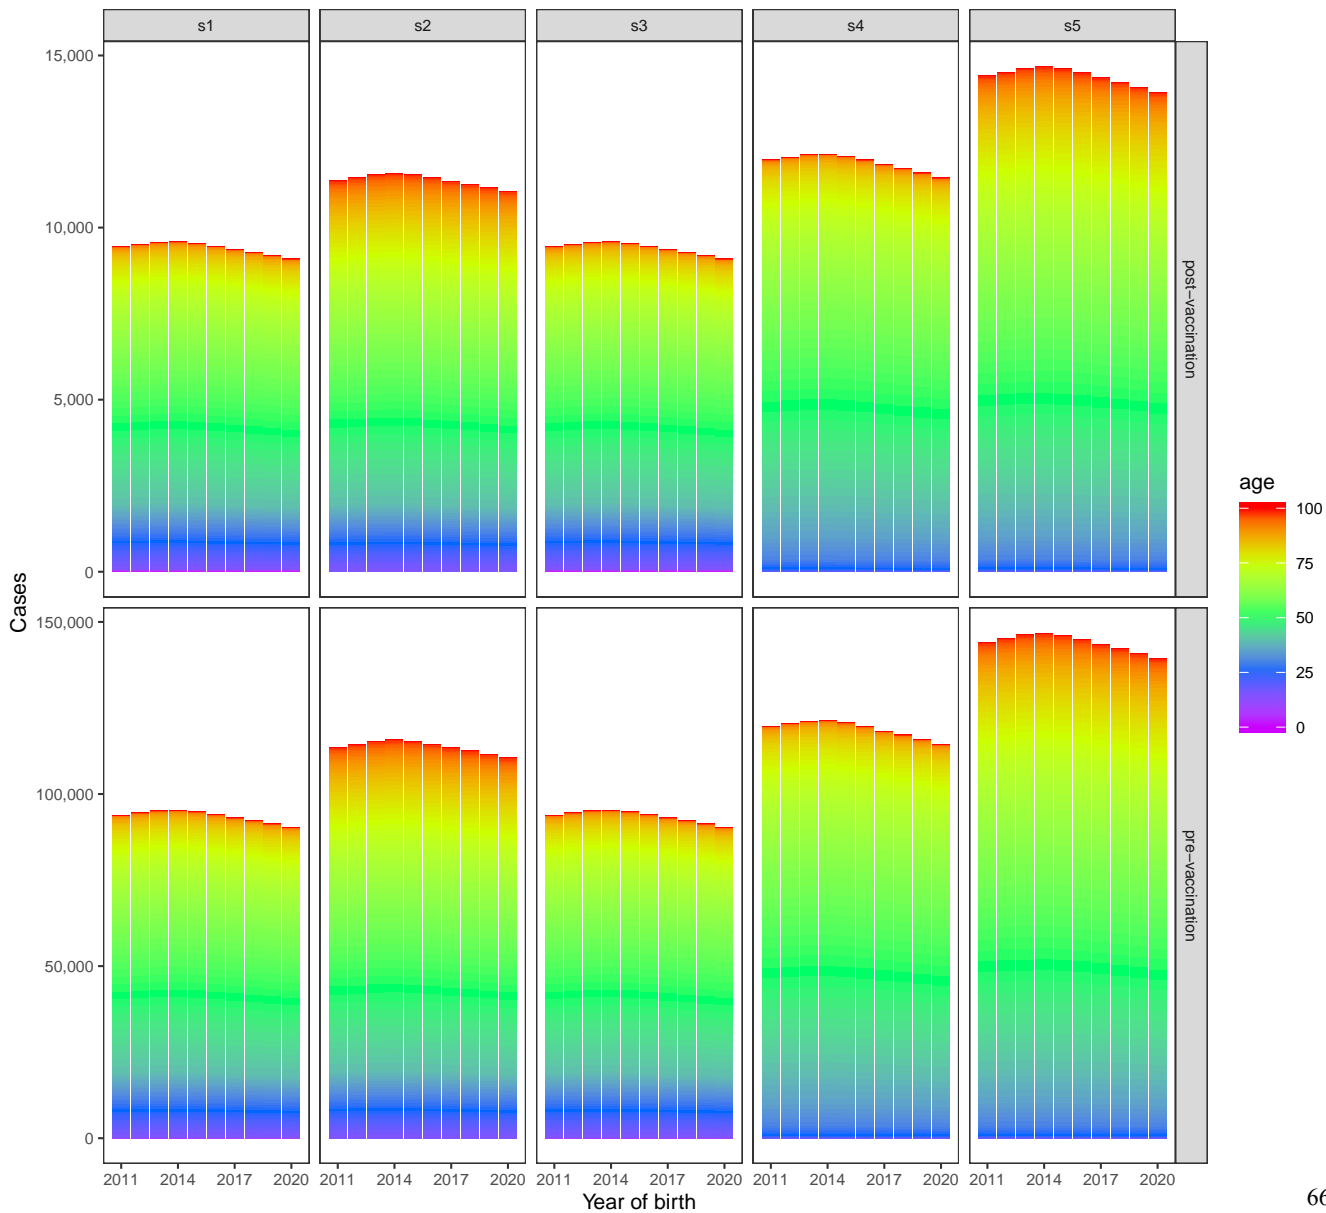

Western Pacific Region  
 Lifetime burden of cervical cancer Deaths  
 caused by HPV 16/18/31/33/45/52/58 pre- and post-vaccination  
 (vaccination age = 9 years / nonavalent vaccine)

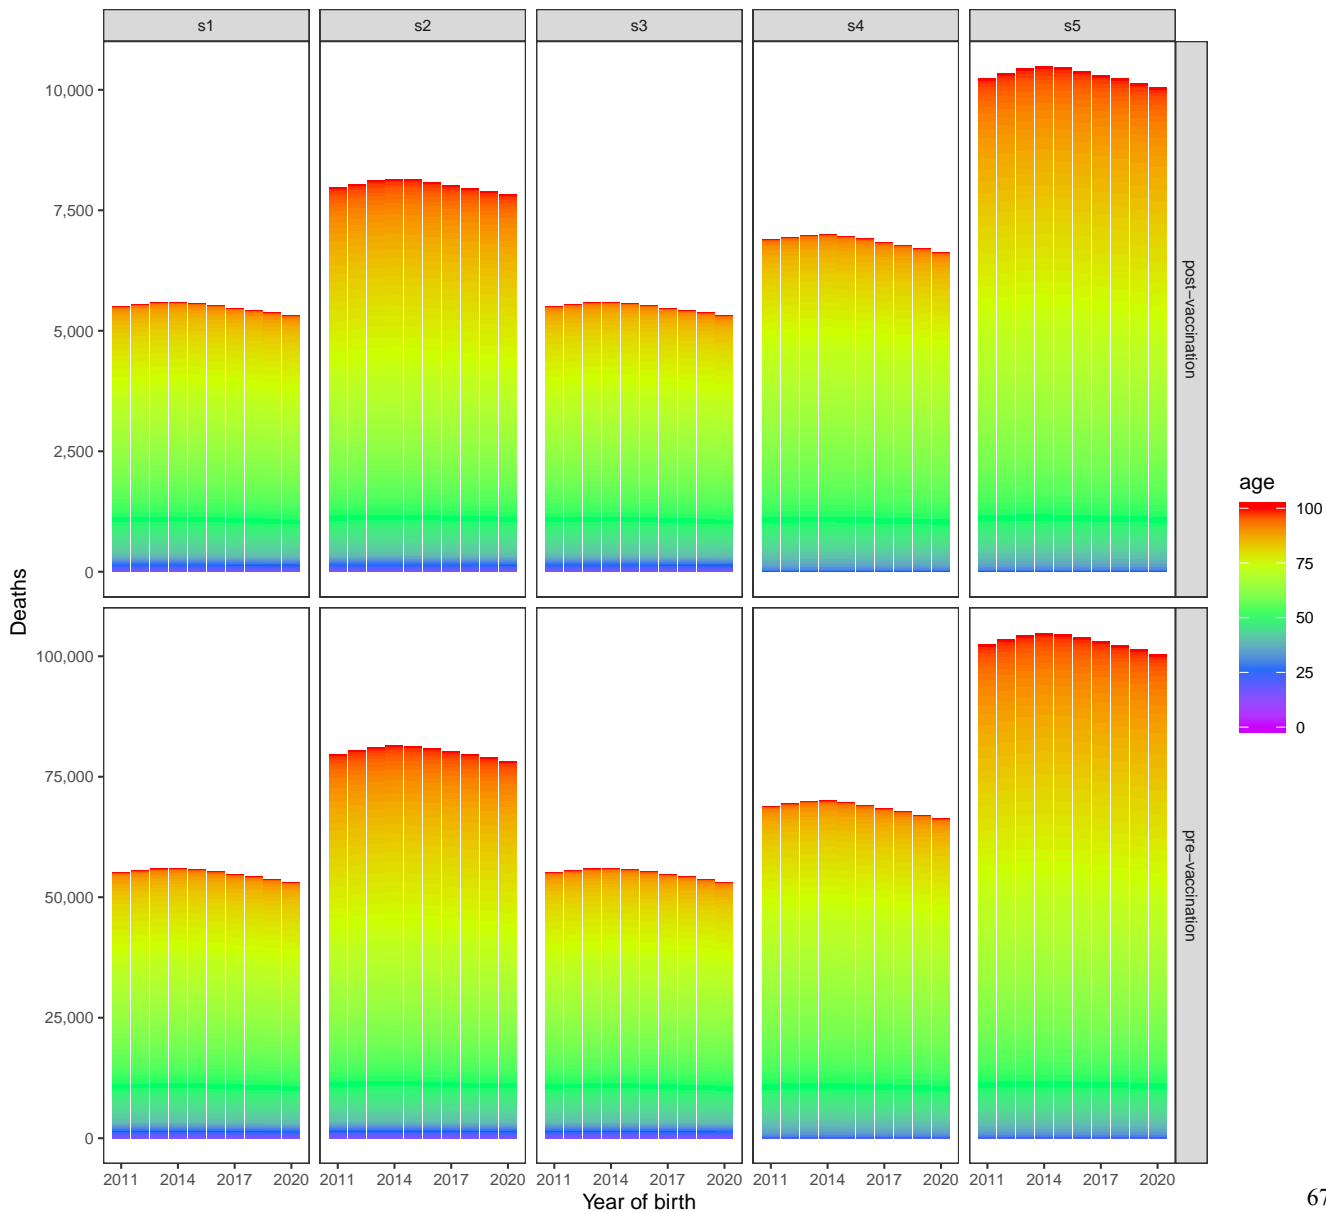

Western Pacific Region  
 Lifetime burden of cervical cancer YLDs  
 caused by HPV 16/18/31/33/45/52/58 pre- and post-vaccination  
 (vaccination age = 9 years / nonavalent vaccine)

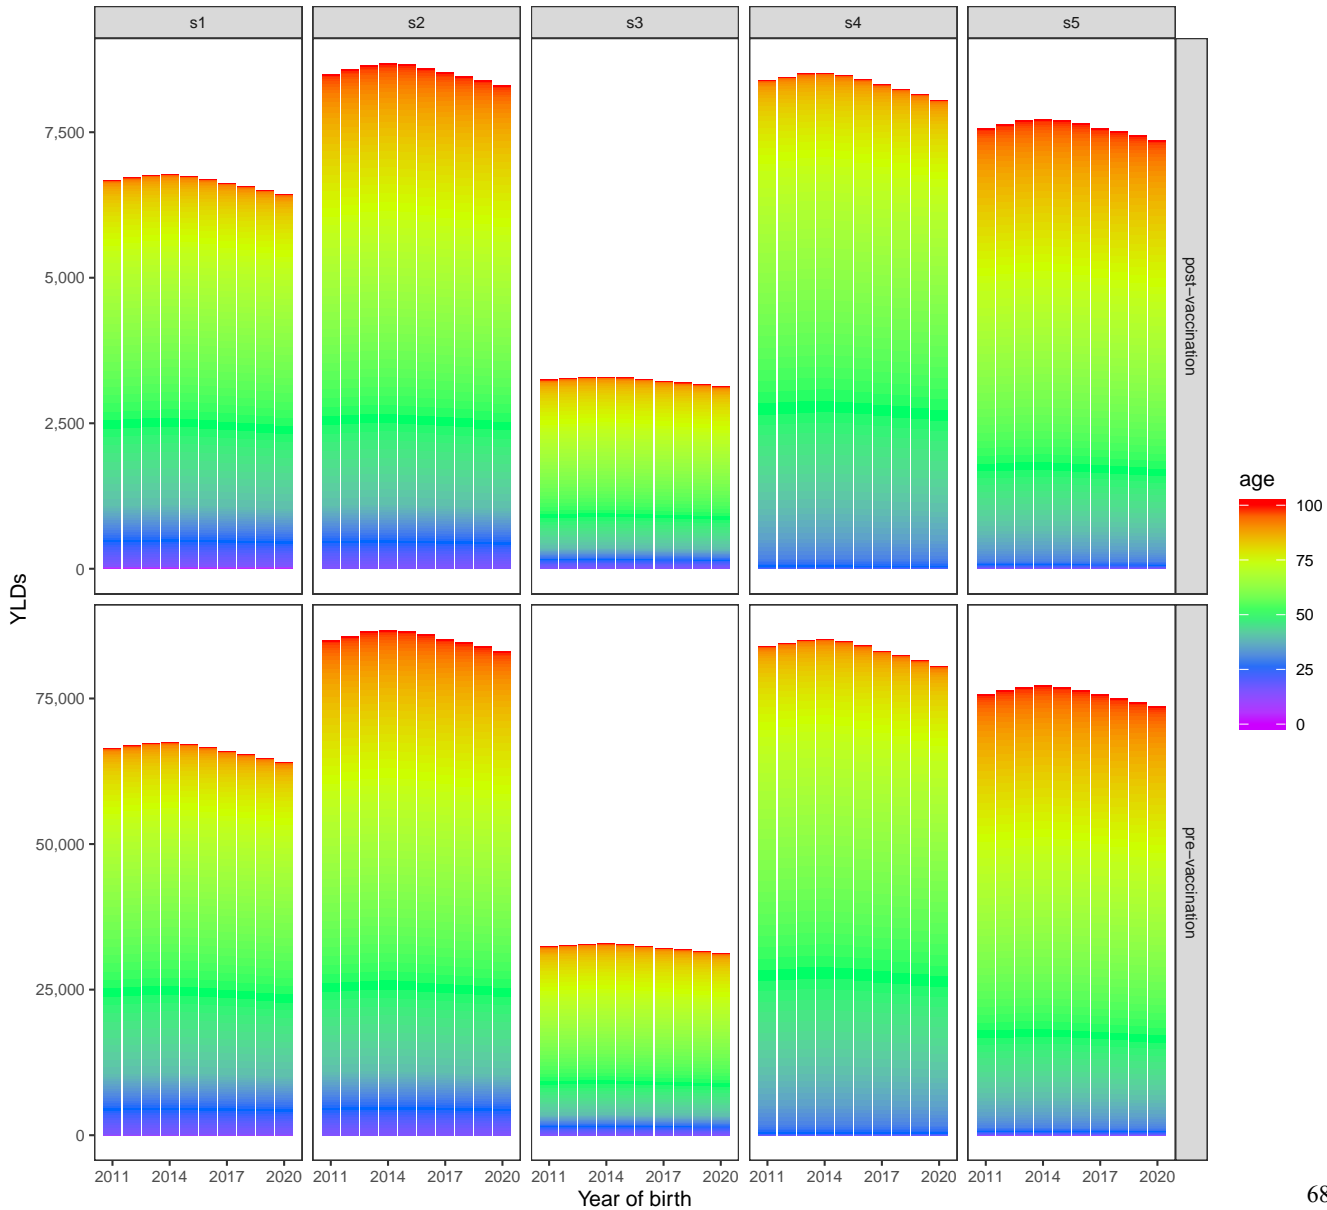

Western Pacific Region  
 Lifetime burden of cervical cancer YLLs  
 caused by HPV 16/18/31/33/45/52/58 pre- and post-vaccination  
 (vaccination age = 9 years / nonavalent vaccine)

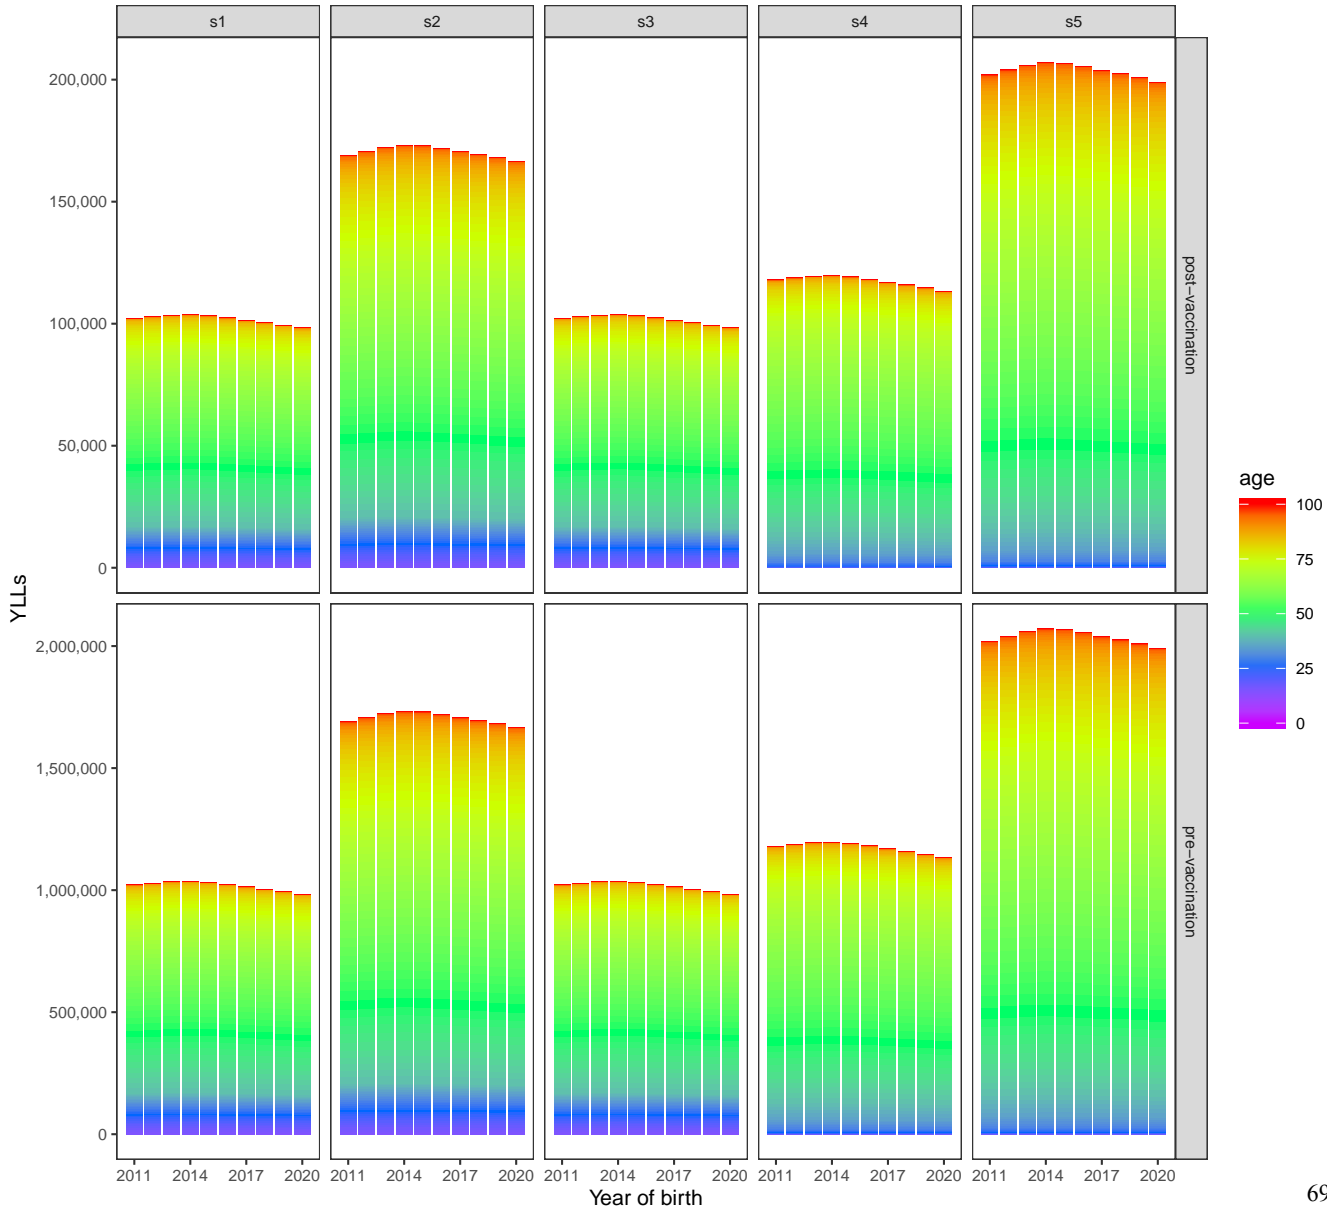

Western Pacific Region  
 Lifetime burden of cervical cancer DALYs  
 caused by HPV 16/18/31/33/45/52/58 pre- and post-vaccination  
 (vaccination age = 9 years / nonavalent vaccine)

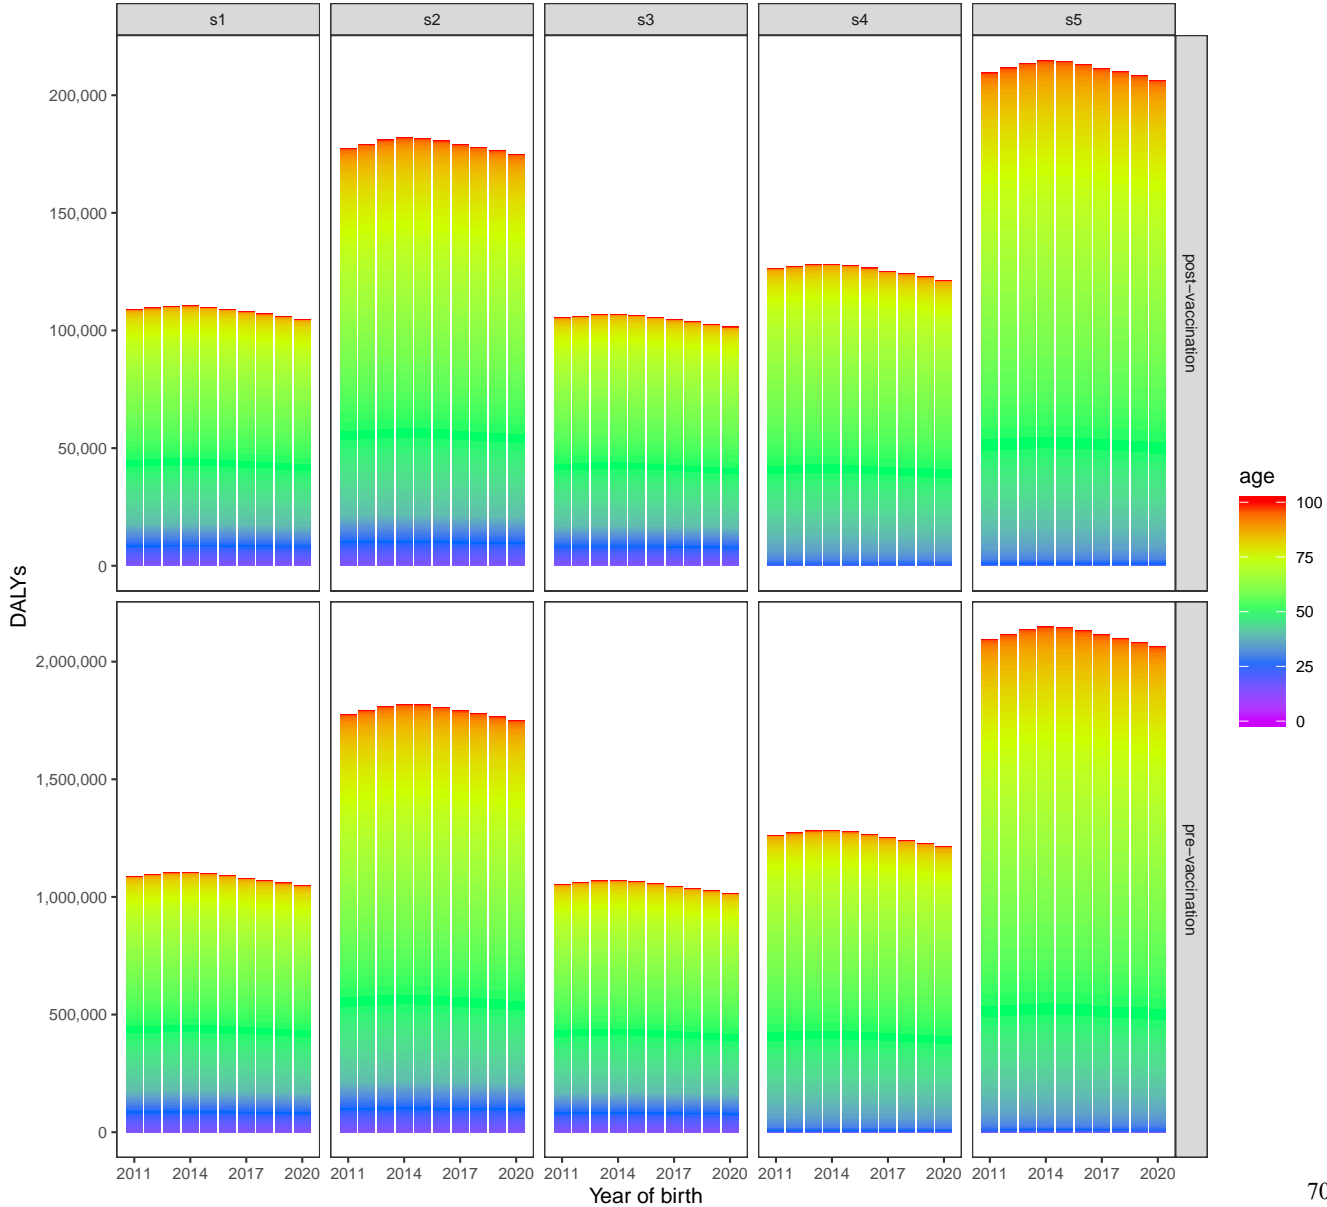

South-East Asia Region  
 Lifetime burden of cervical cancer Cases  
 caused by HPV 16/18/31/33/45/52/58 pre- and post-vaccination  
 (vaccination age = 9 years / nonavalent vaccine)

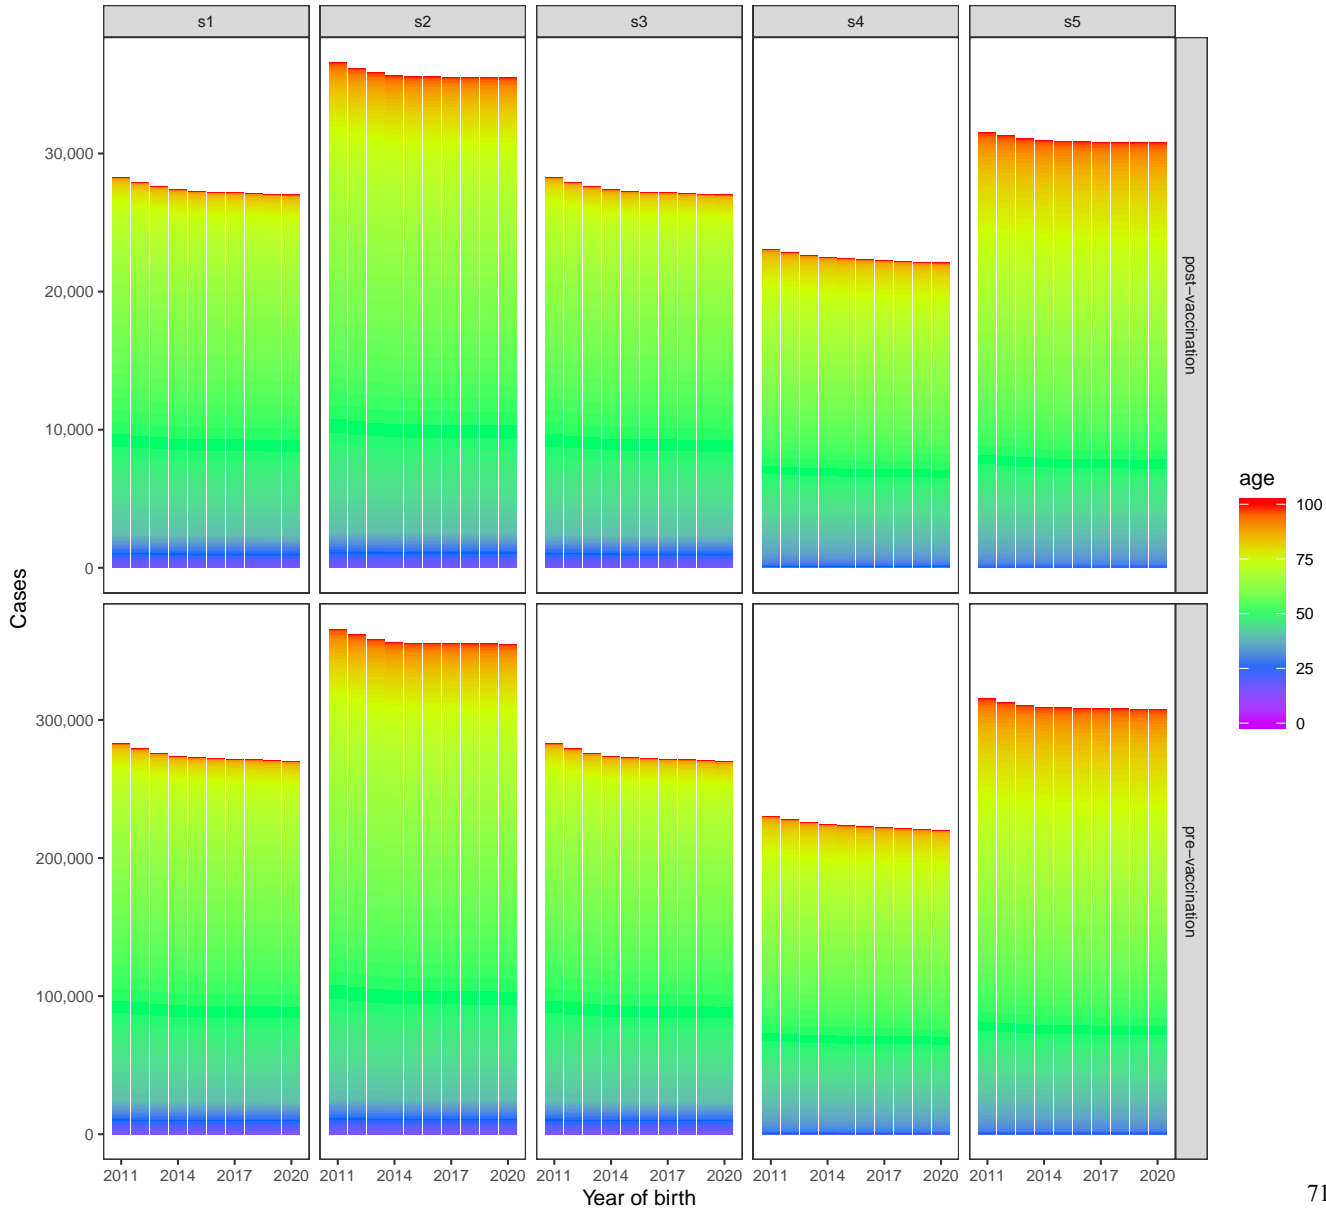

South-East Asia Region  
 Lifetime burden of cervical cancer Deaths  
 caused by HPV 16/18/31/33/45/52/58 pre- and post-vaccination  
 (vaccination age = 9 years / nonavalent vaccine)

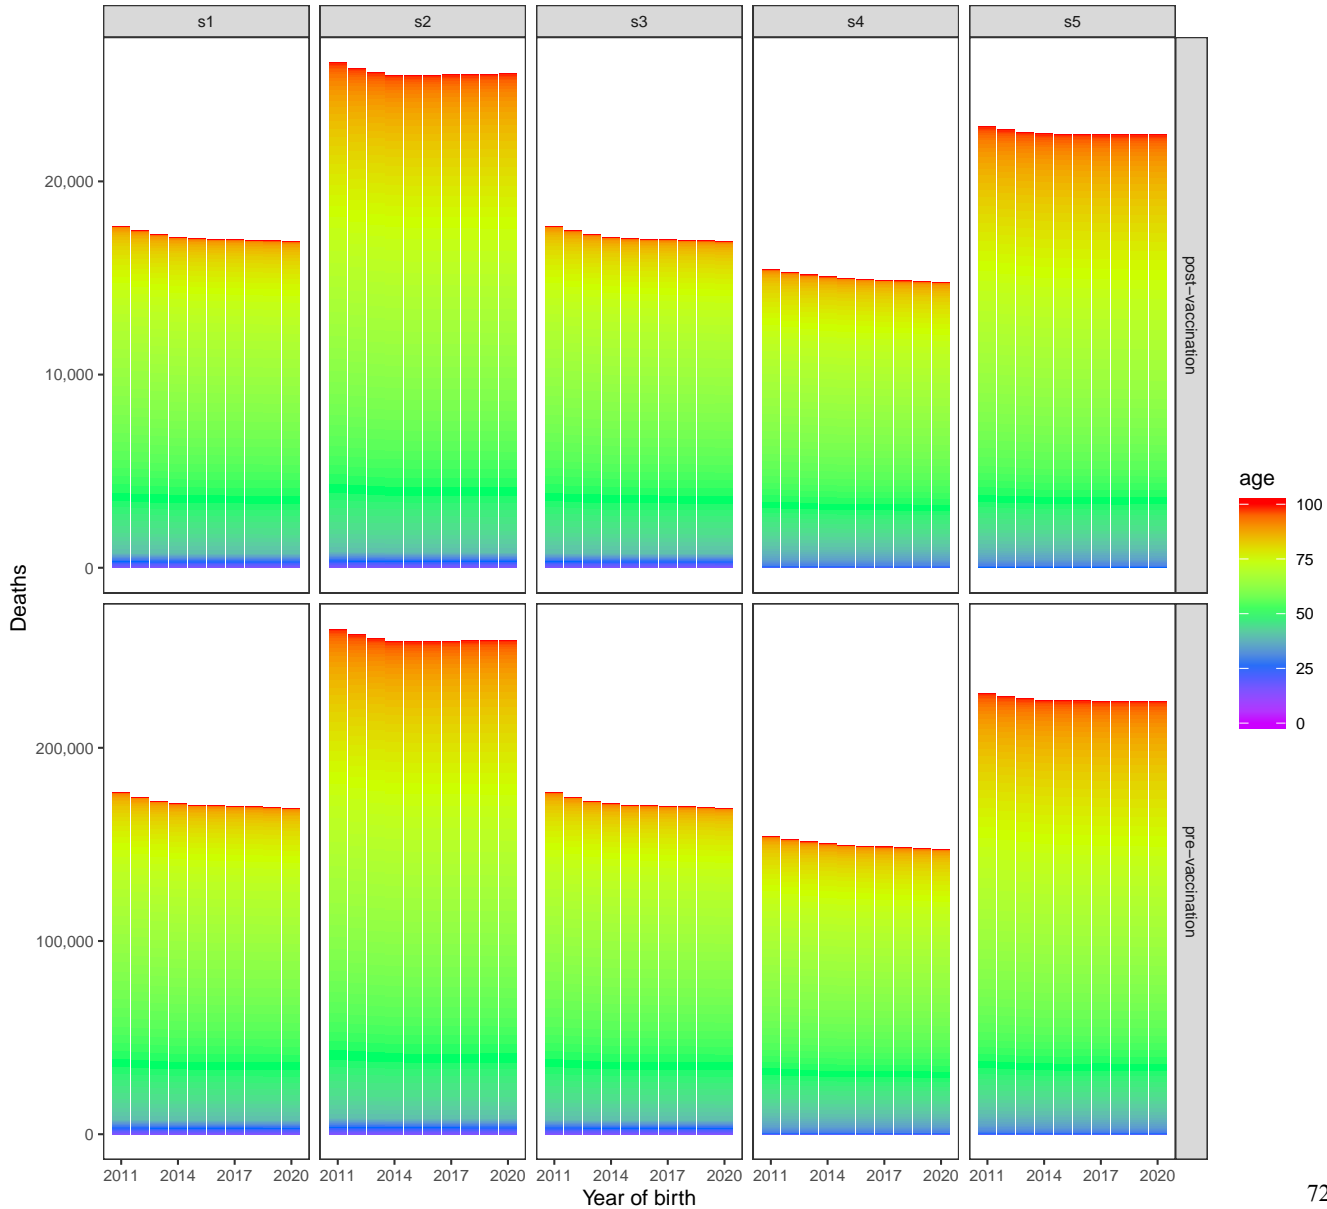

South-East Asia Region  
 Lifetime burden of cervical cancer YLDs  
 caused by HPV 16/18/31/33/45/52/58 pre- and post-vaccination  
 (vaccination age = 9 years / nonavalent vaccine)

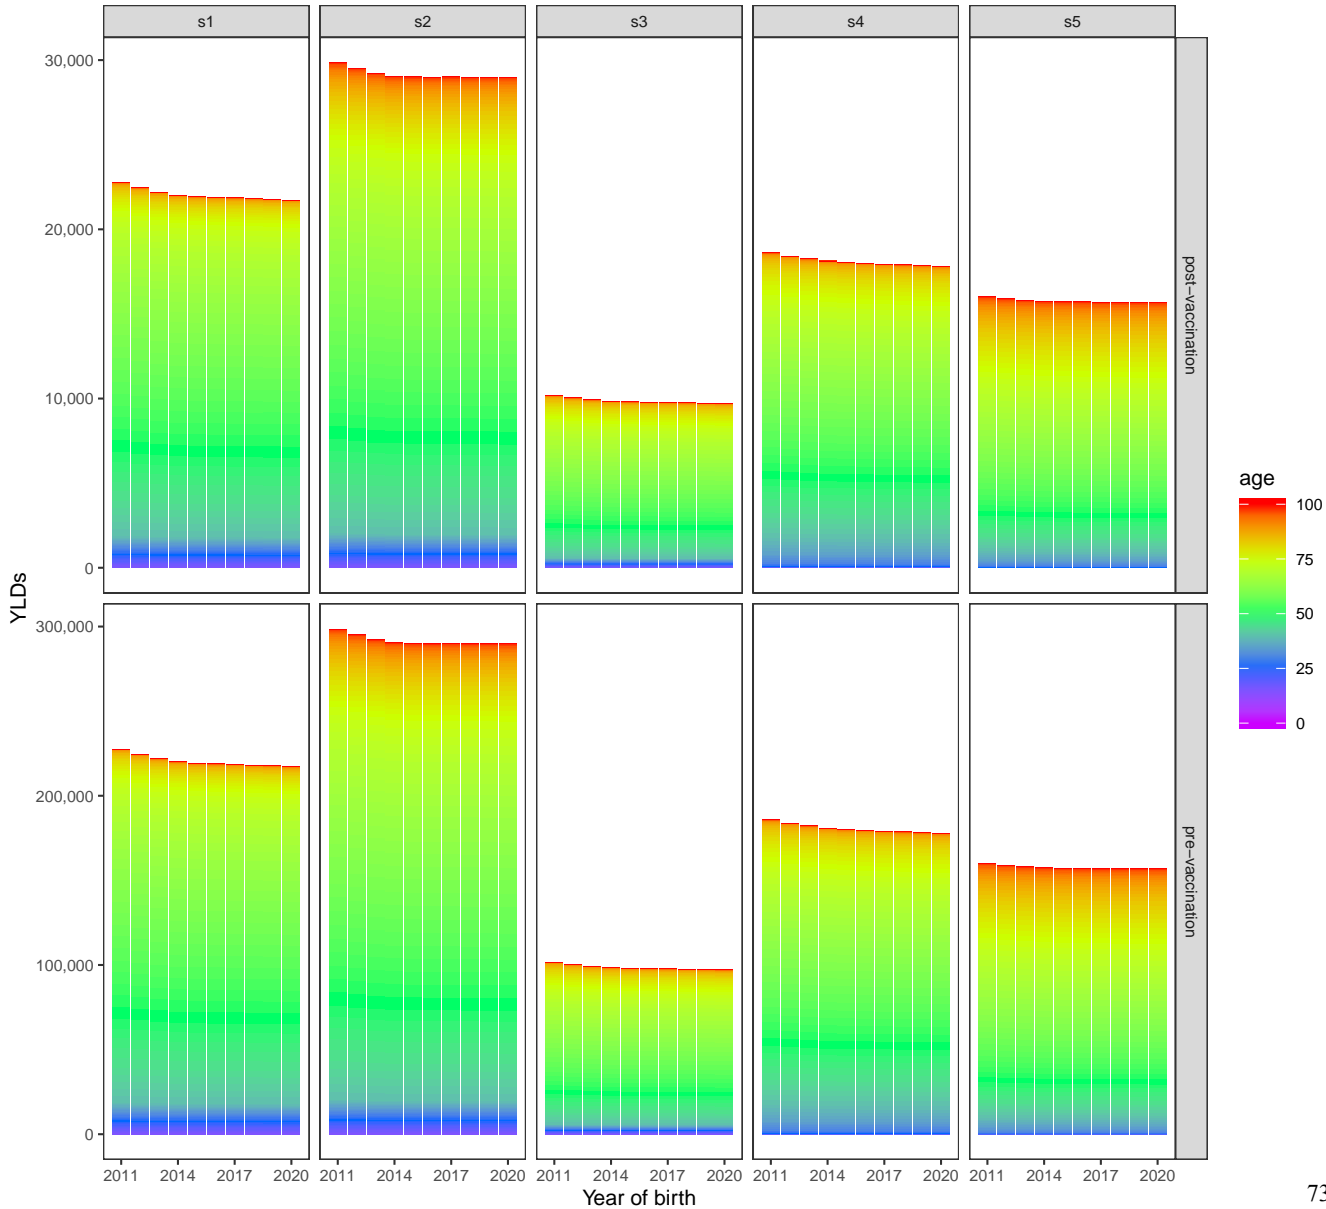



South-East Asia Region  
 Lifetime burden of cervical cancer YLLs  
 caused by HPV 16/18/31/33/45/52/58 pre- and post-vaccination  
 (vaccination age = 9 years / nonavalent vaccine)

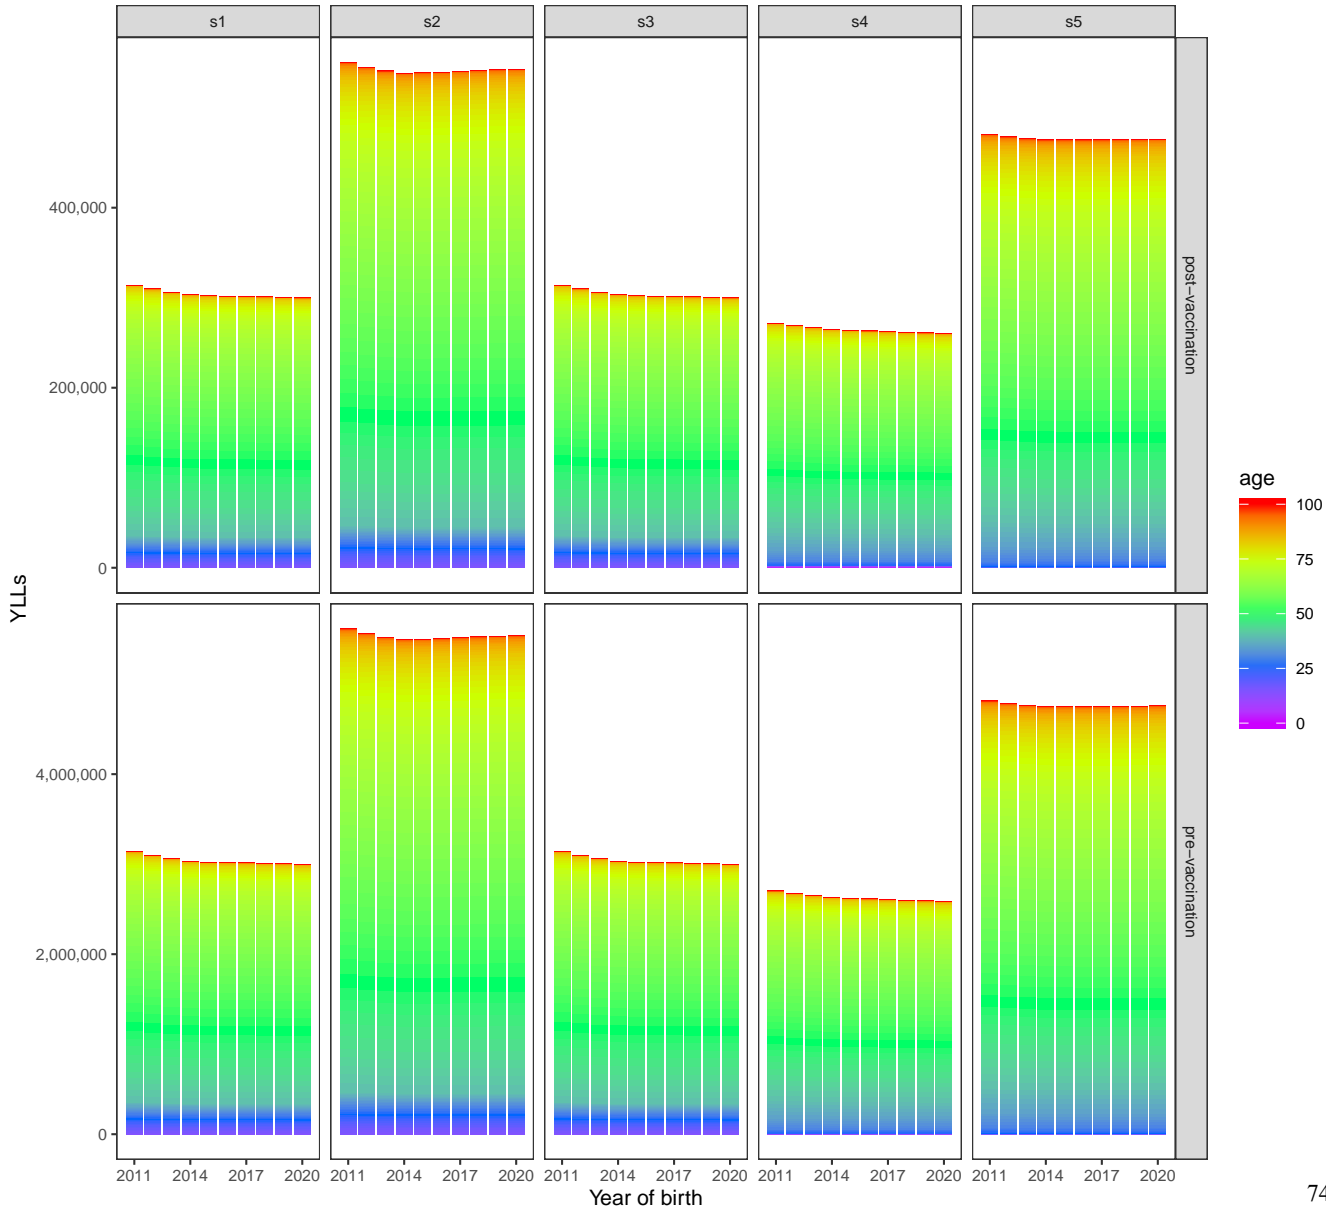

South-East Asia Region  
 Lifetime burden of cervical cancer DALYs  
 caused by HPV 16/18/31/33/45/52/58 pre- and post-vaccination  
 (vaccination age = 9 years / nonavalent vaccine)

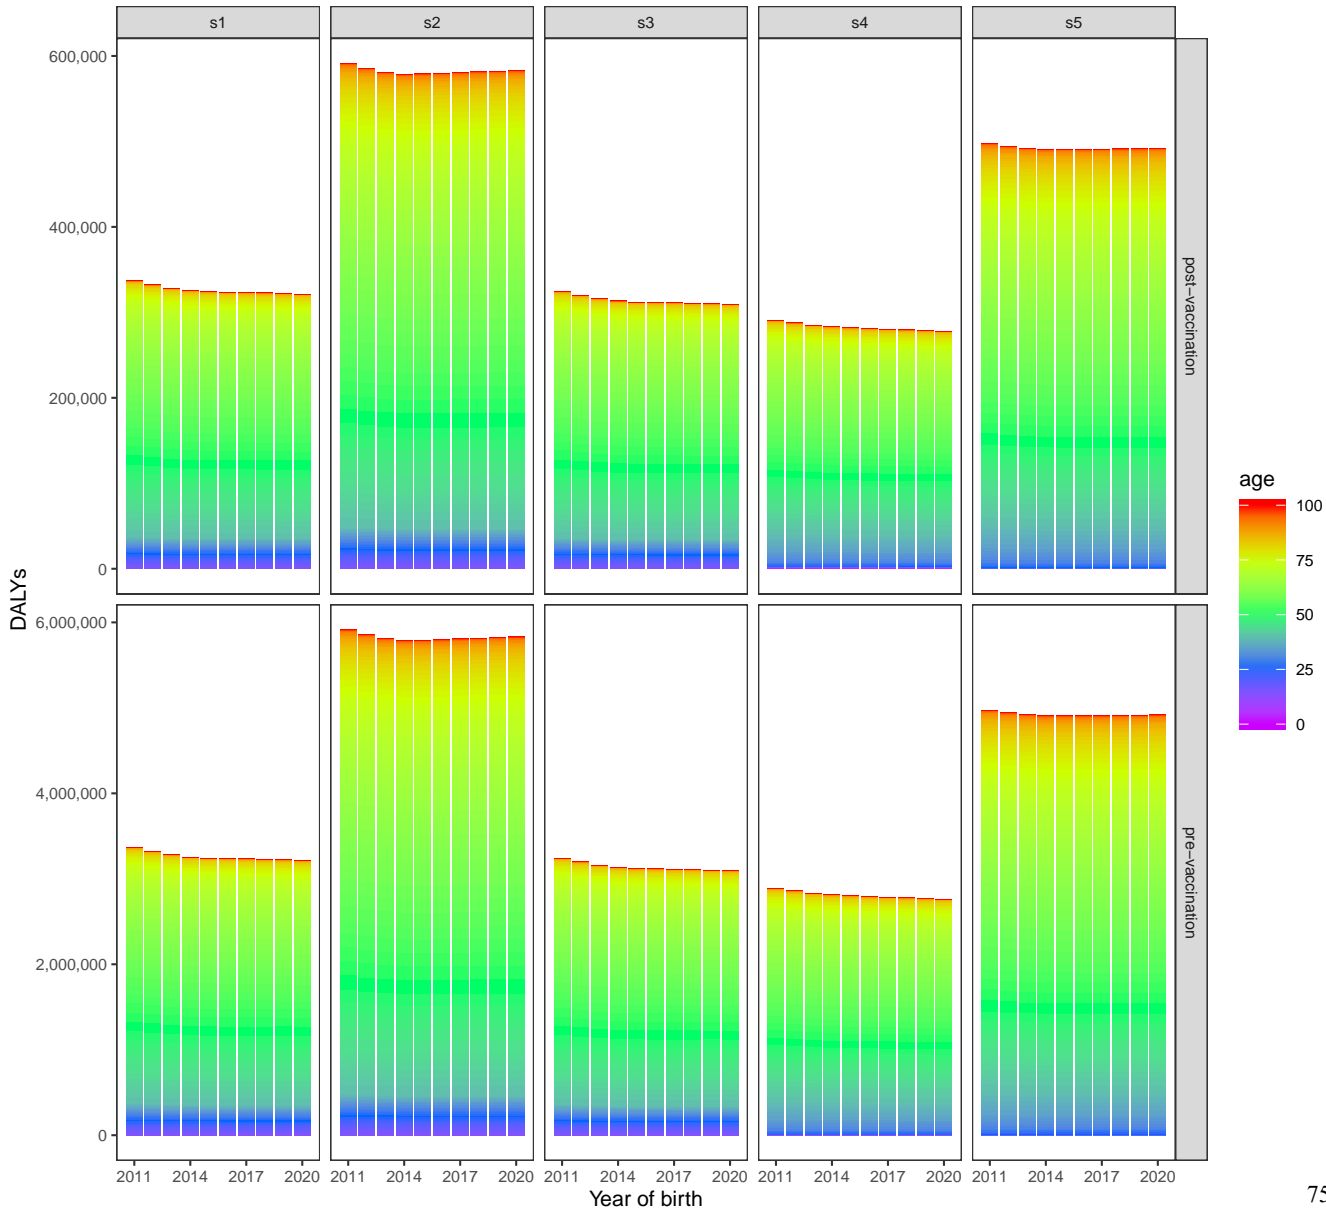

Eastern Mediterranean Region  
 Lifetime burden of cervical cancer Cases  
 caused by HPV 16/18 pre- and post-vaccination  
 (vaccination age = 12 years / bivalent/quadrivalent vaccine)

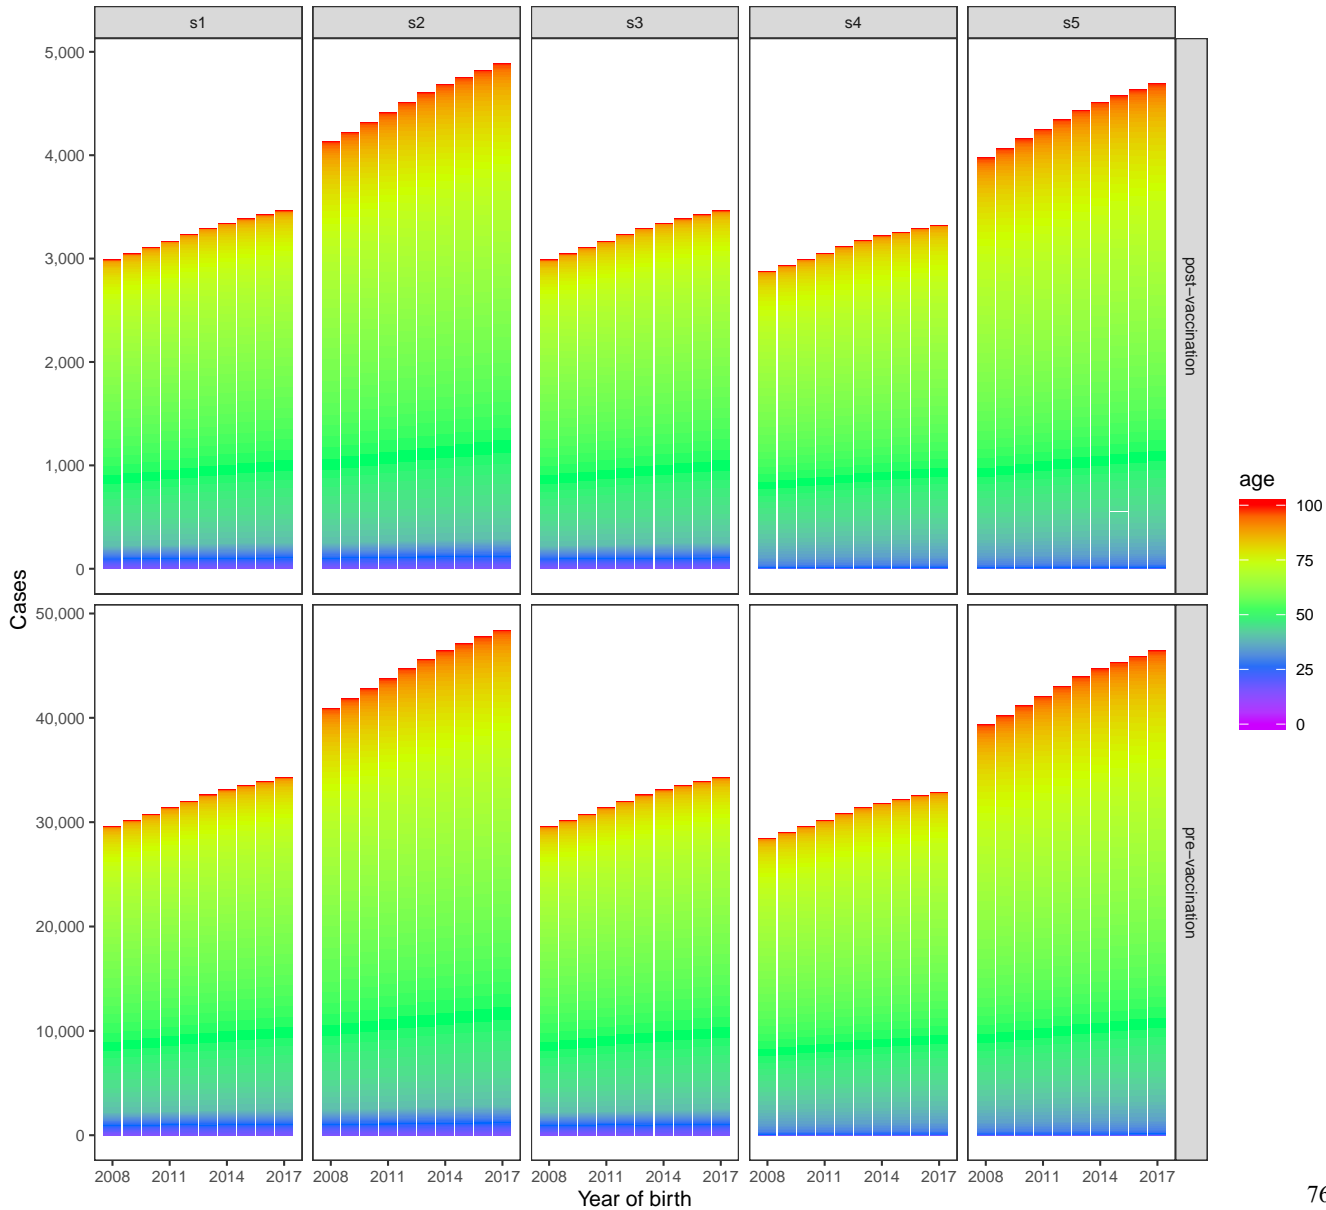

Eastern Mediterranean Region  
 Lifetime burden of cervical cancer Deaths  
 caused by HPV 16/18 pre- and post-vaccination  
 (vaccination age = 12 years / bivalent/quadrivalent vaccine)

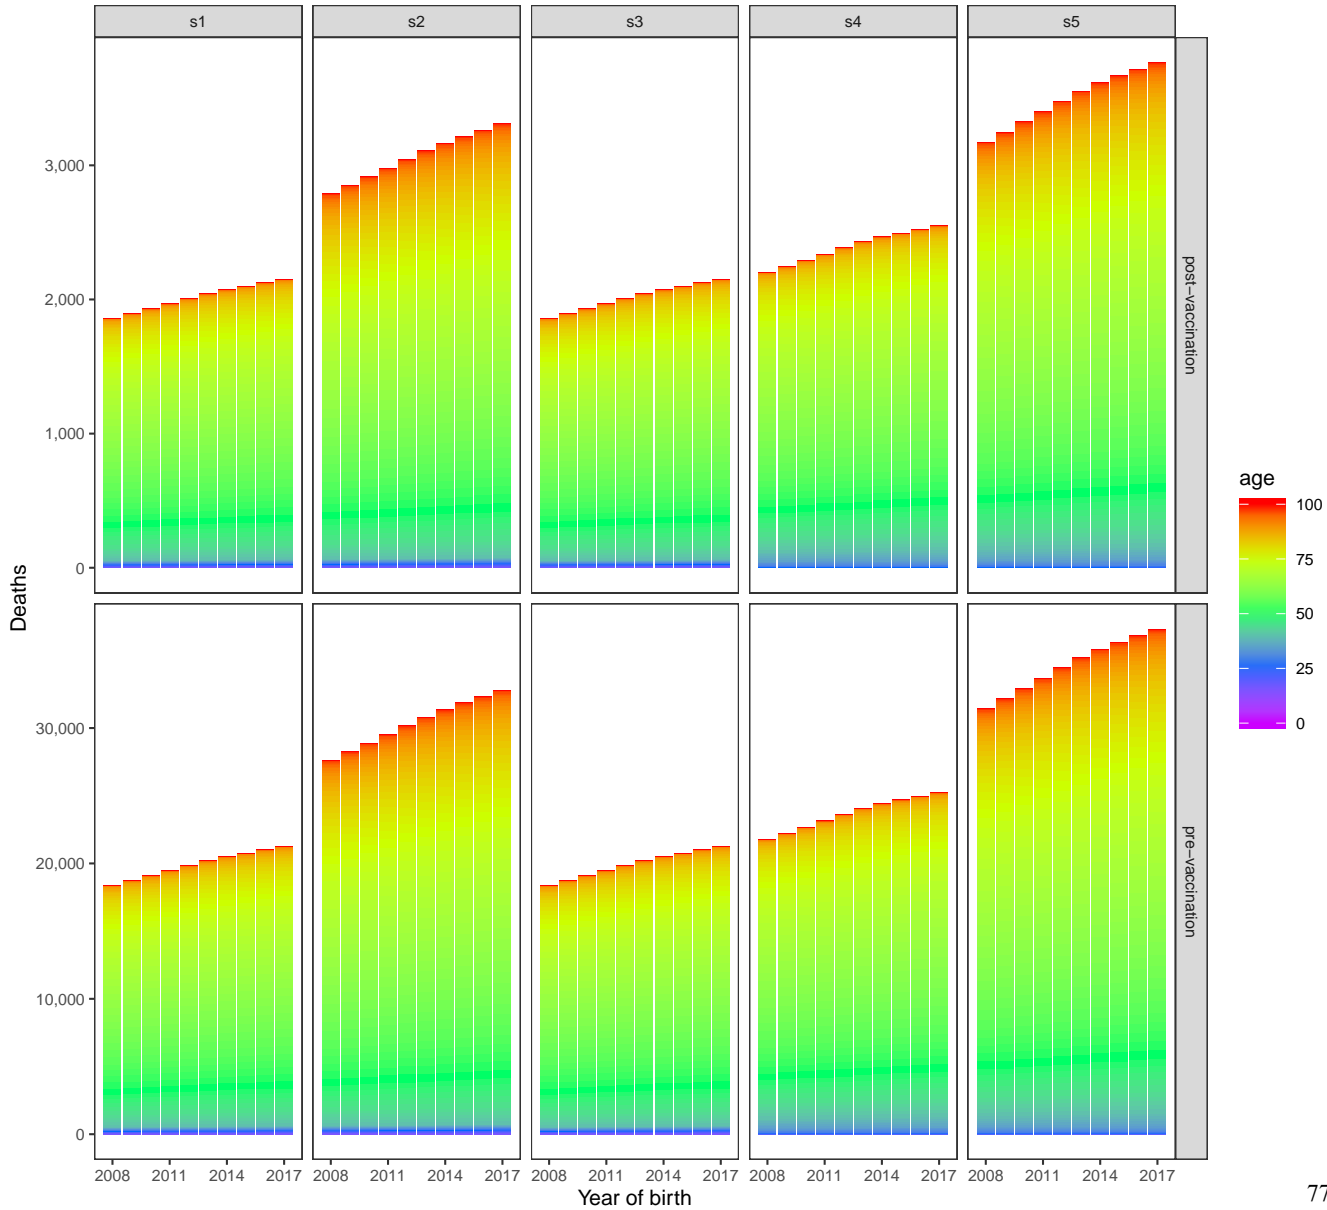

Eastern Mediterranean Region  
 Lifetime burden of cervical cancer YLDs  
 caused by HPV 16/18 pre- and post-vaccination  
 (vaccination age = 12 years / bivalent/quadrivalent vaccine)

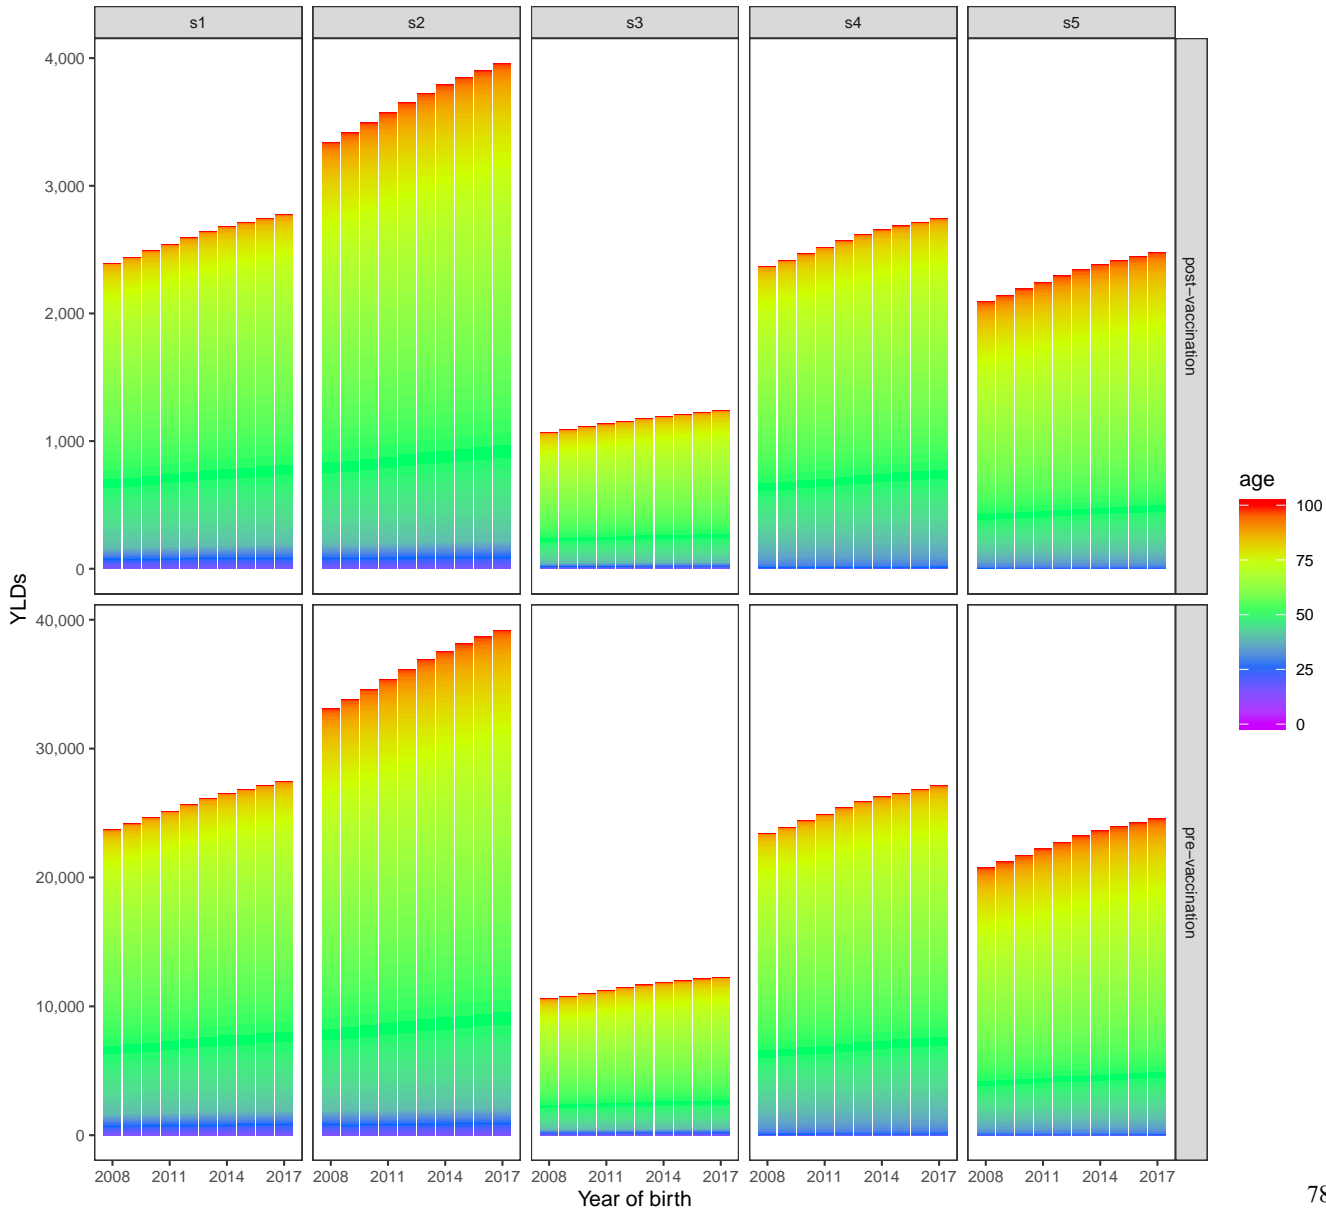

Eastern Mediterranean Region  
 Lifetime burden of cervical cancer YLLs  
 caused by HPV 16/18 pre- and post-vaccination  
 (vaccination age = 12 years / bivalent/quadrivalent vaccine)

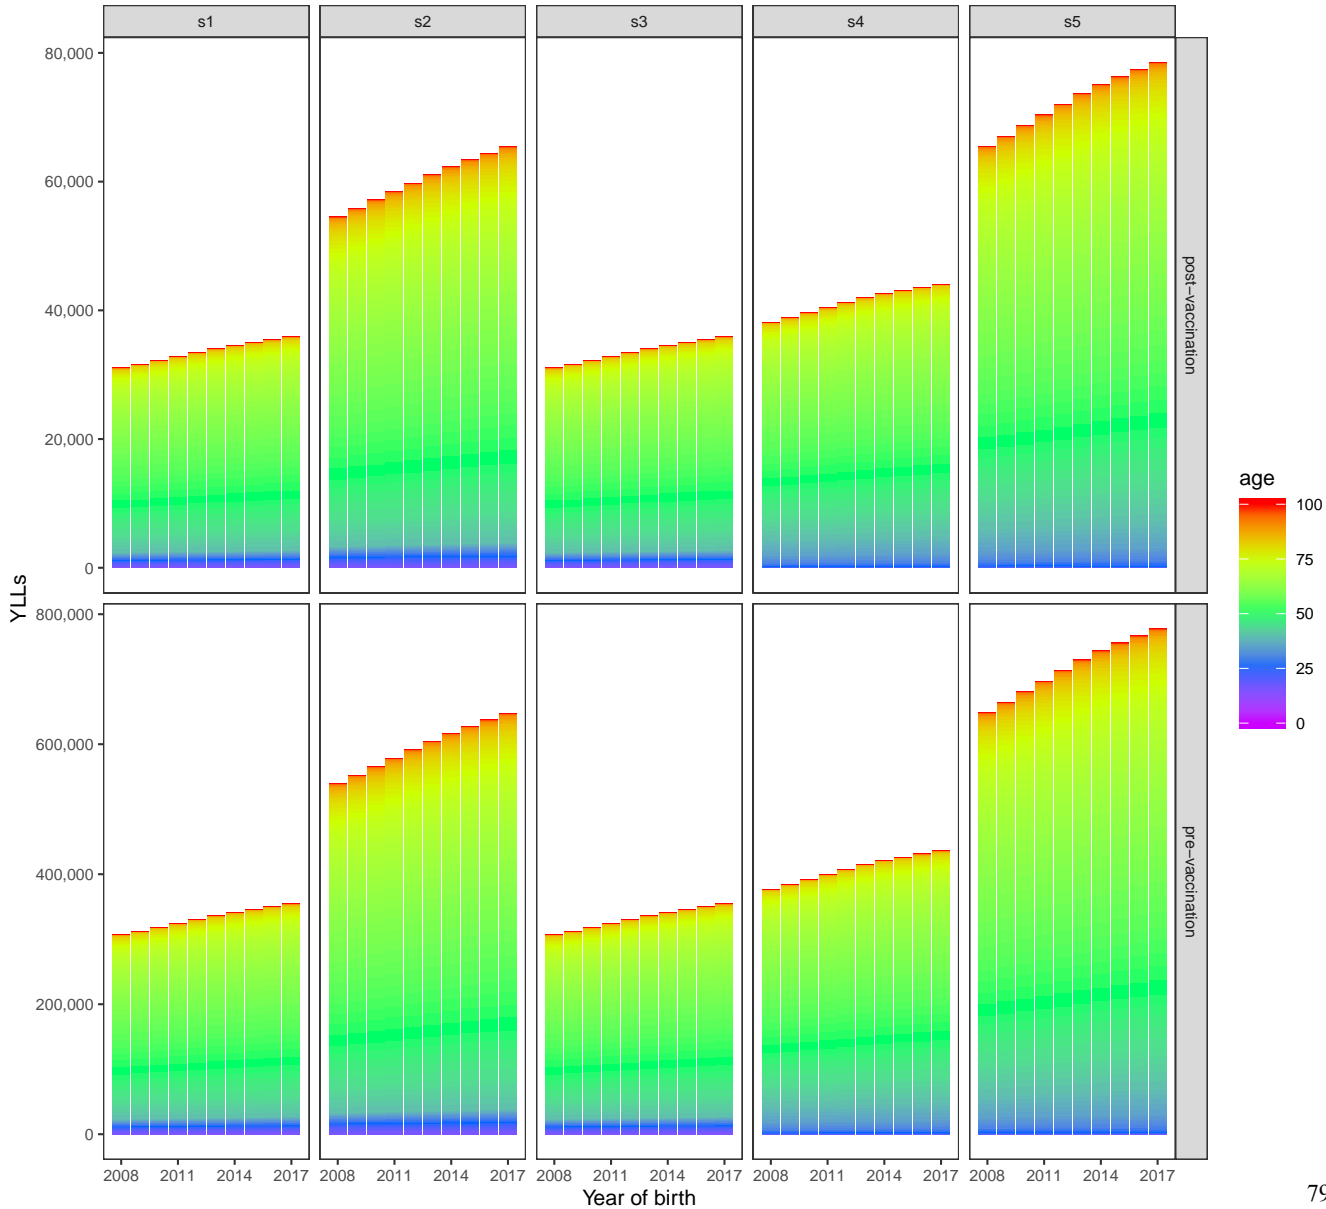

Eastern Mediterranean Region  
 Lifetime burden of cervical cancer DALYs  
 caused by HPV 16/18 pre- and post-vaccination  
 (vaccination age = 12 years / bivalent/quadrivalent vaccine)

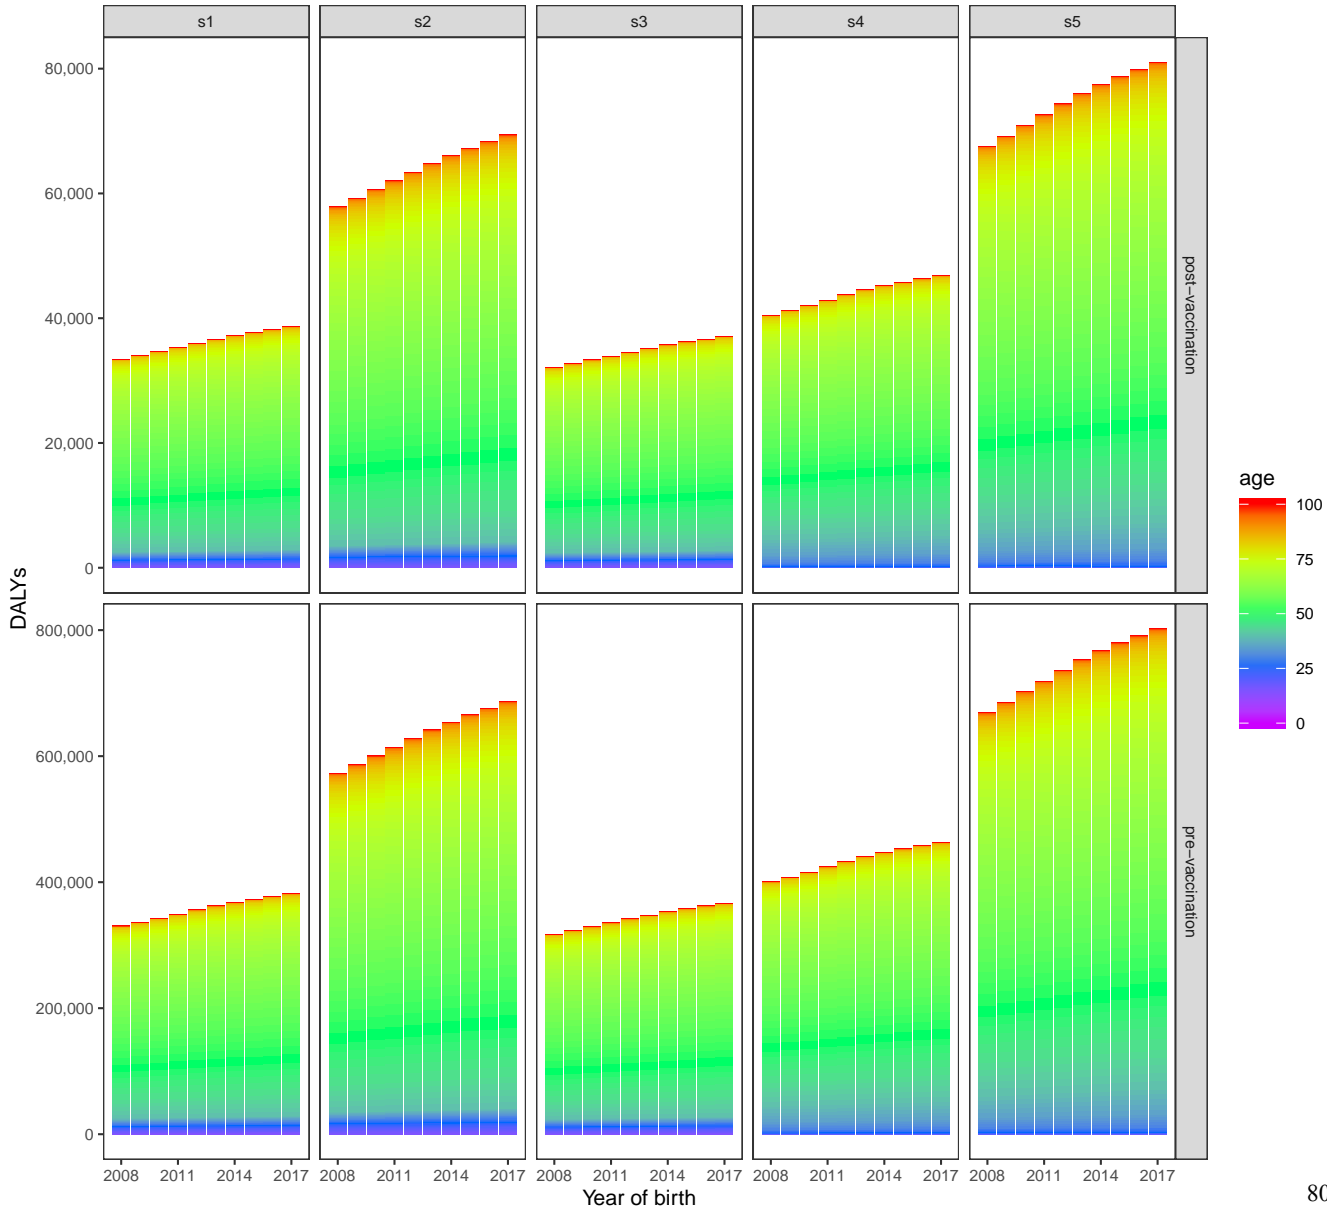

African Region  
 Lifetime burden of cervical cancer Cases  
 caused by HPV 16/18 pre- and post-vaccination  
 (vaccination age = 12 years / bivalent/quadrivalent vaccine)

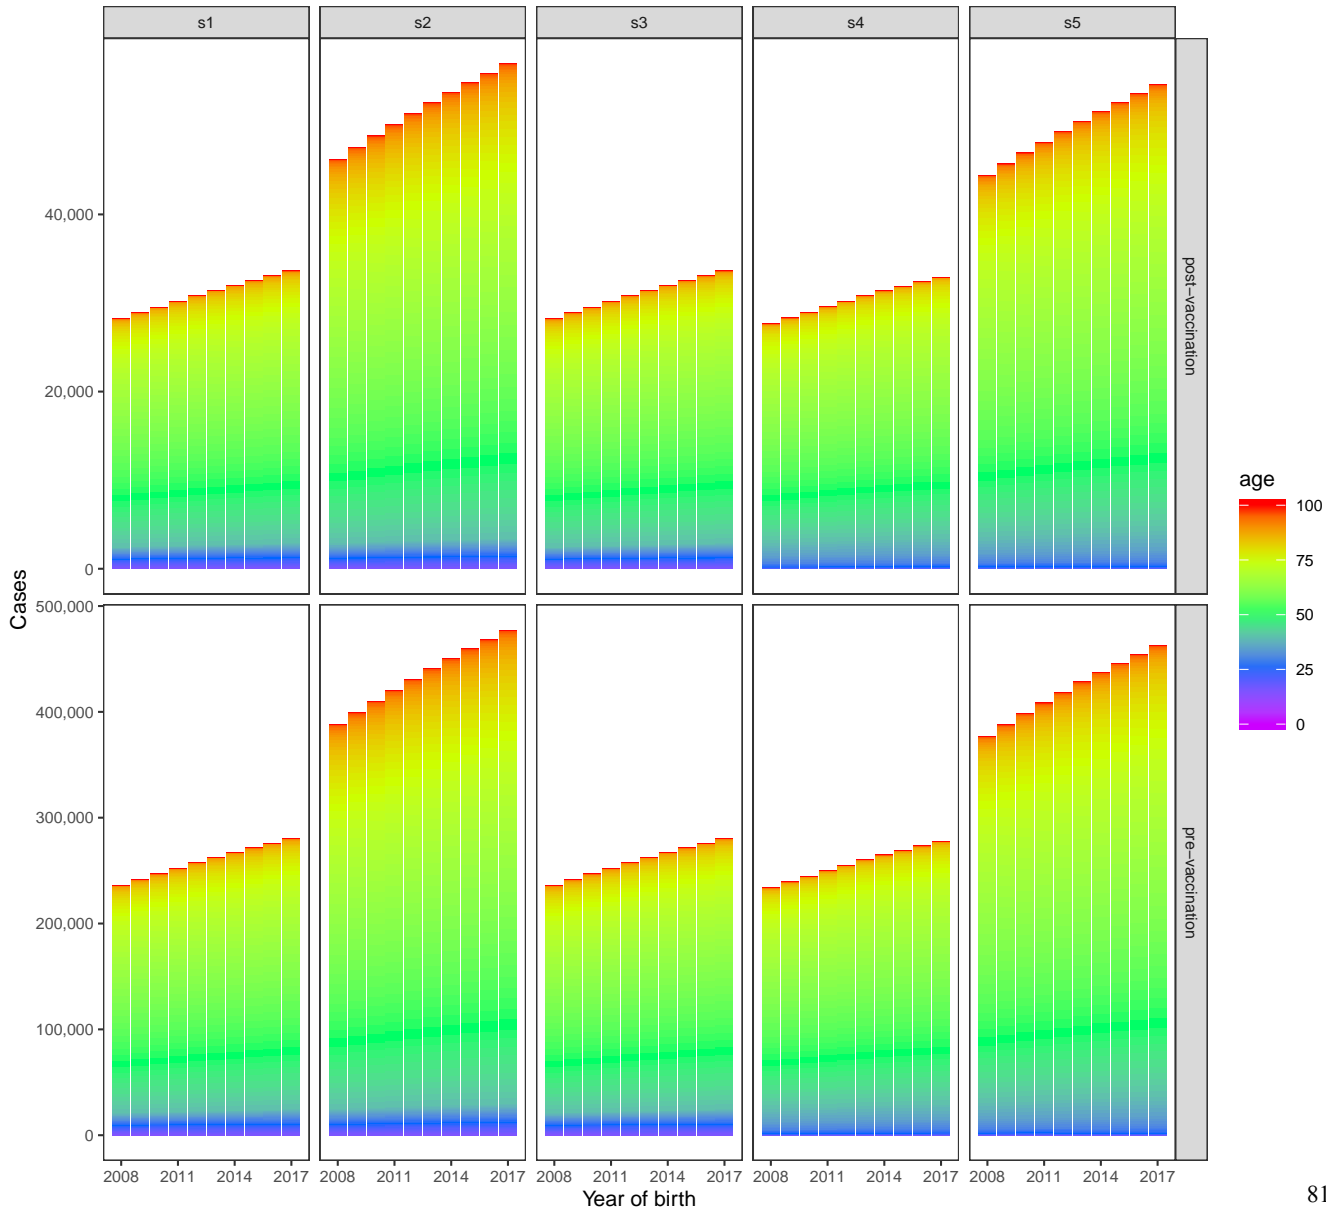



African Region  
 Lifetime burden of cervical cancer Deaths  
 caused by HPV 16/18 pre- and post-vaccination  
 (vaccination age = 12 years / bivalent/quadrivalent vaccine)

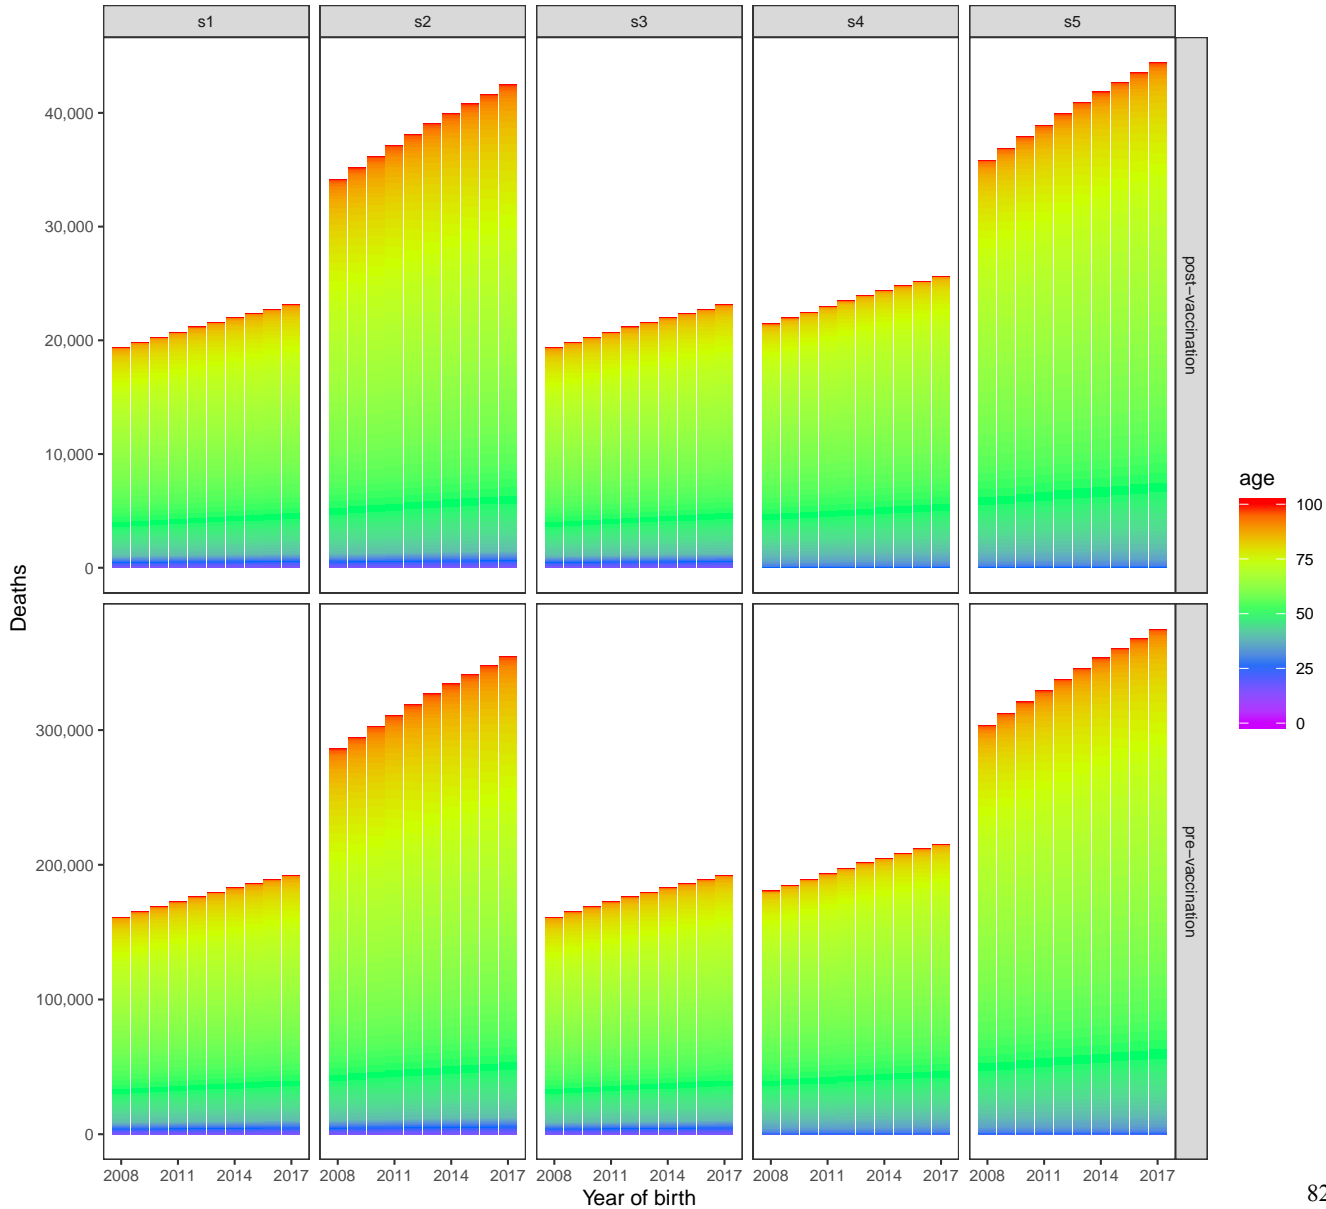

African Region  
 Lifetime burden of cervical cancer YLDs  
 caused by HPV 16/18 pre- and post-vaccination  
 (vaccination age = 12 years / bivalent/quadrivalent vaccine)

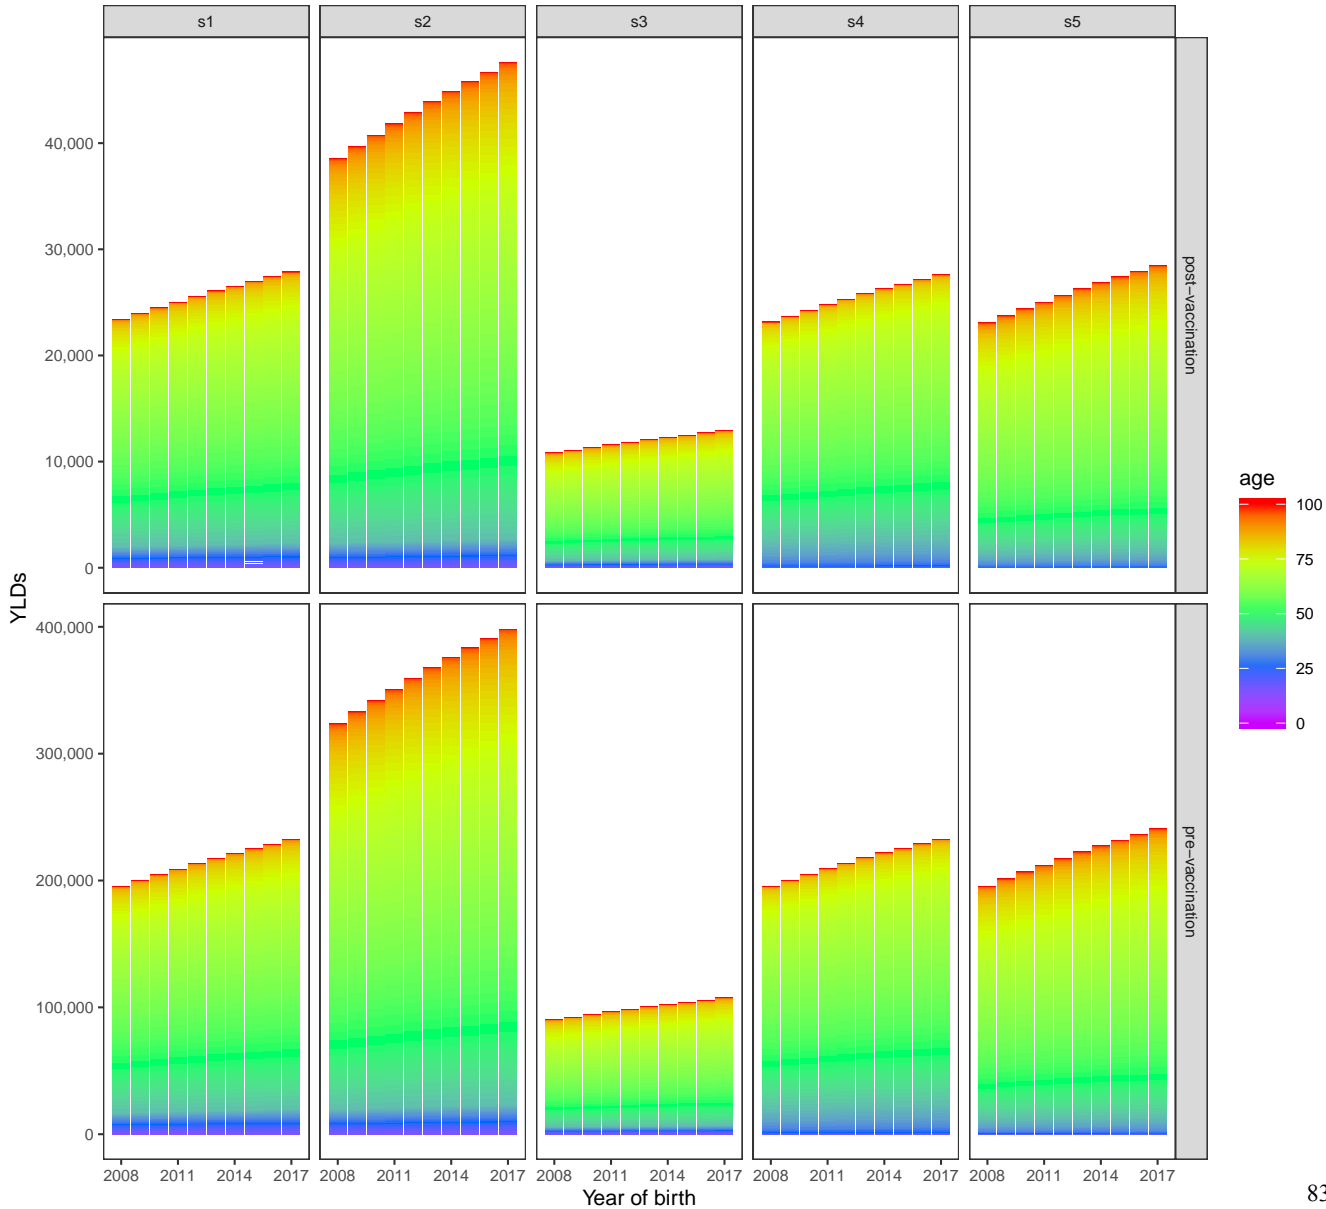

African Region  
 Lifetime burden of cervical cancer YLLs  
 caused by HPV 16/18 pre- and post-vaccination  
 (vaccination age = 12 years / bivalent/quadrivalent vaccine)

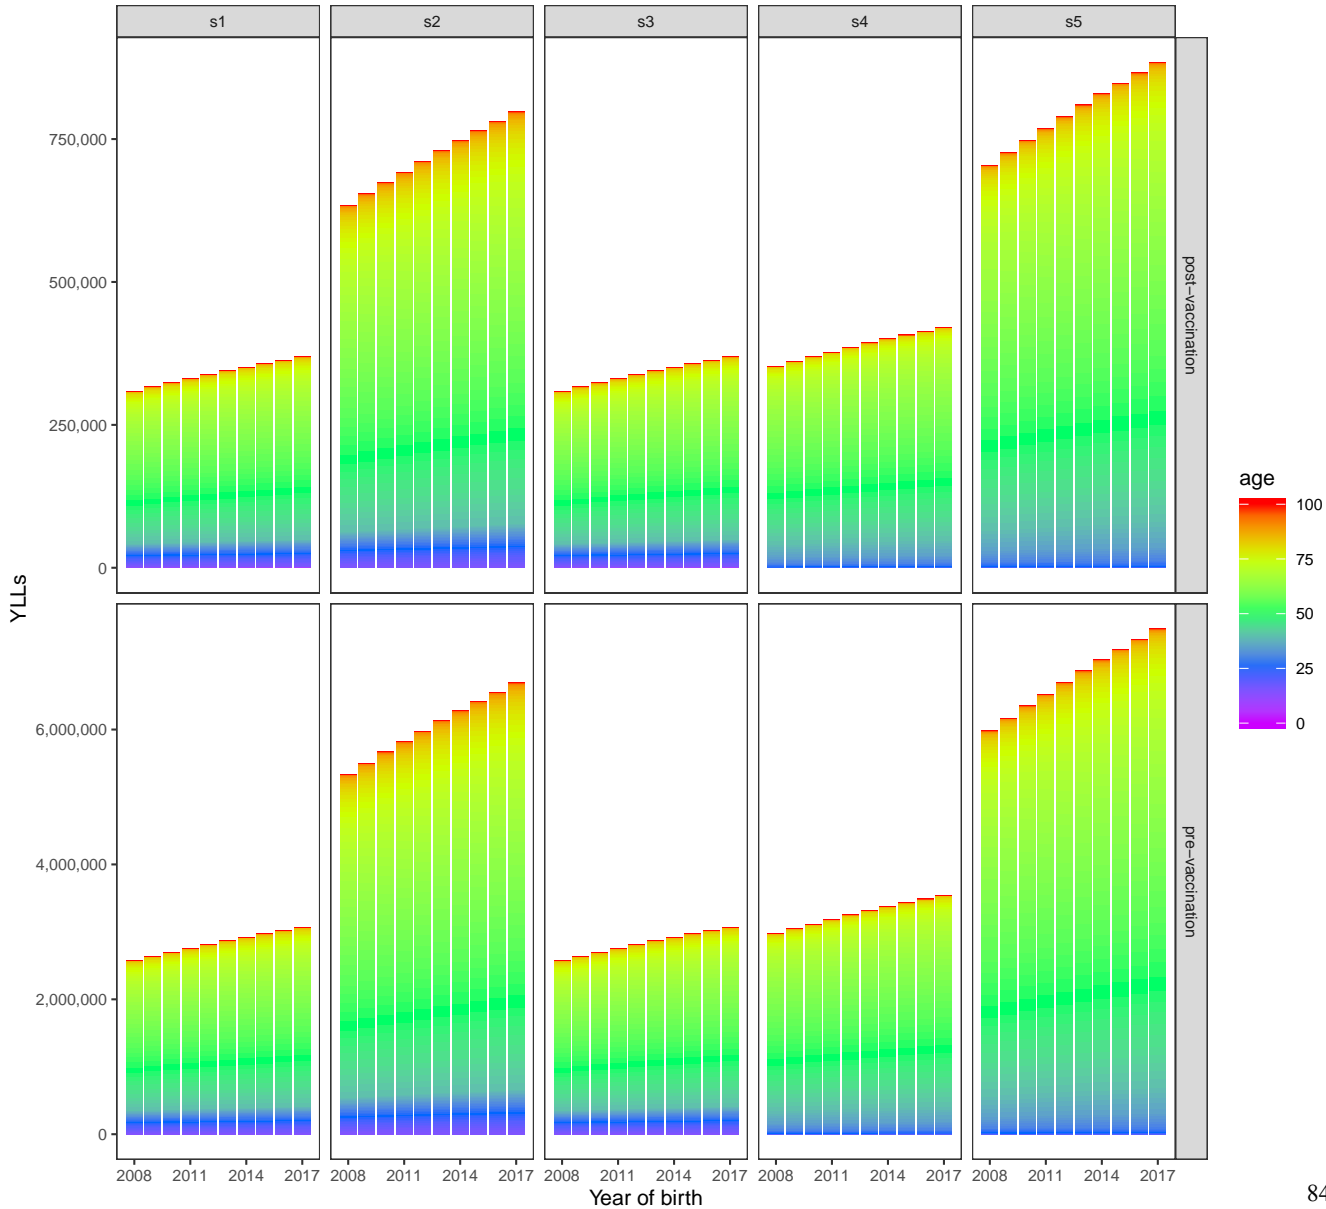

African Region  
 Lifetime burden of cervical cancer DALYs  
 caused by HPV 16/18 pre- and post-vaccination  
 (vaccination age = 12 years / bivalent/quadrivalent vaccine)

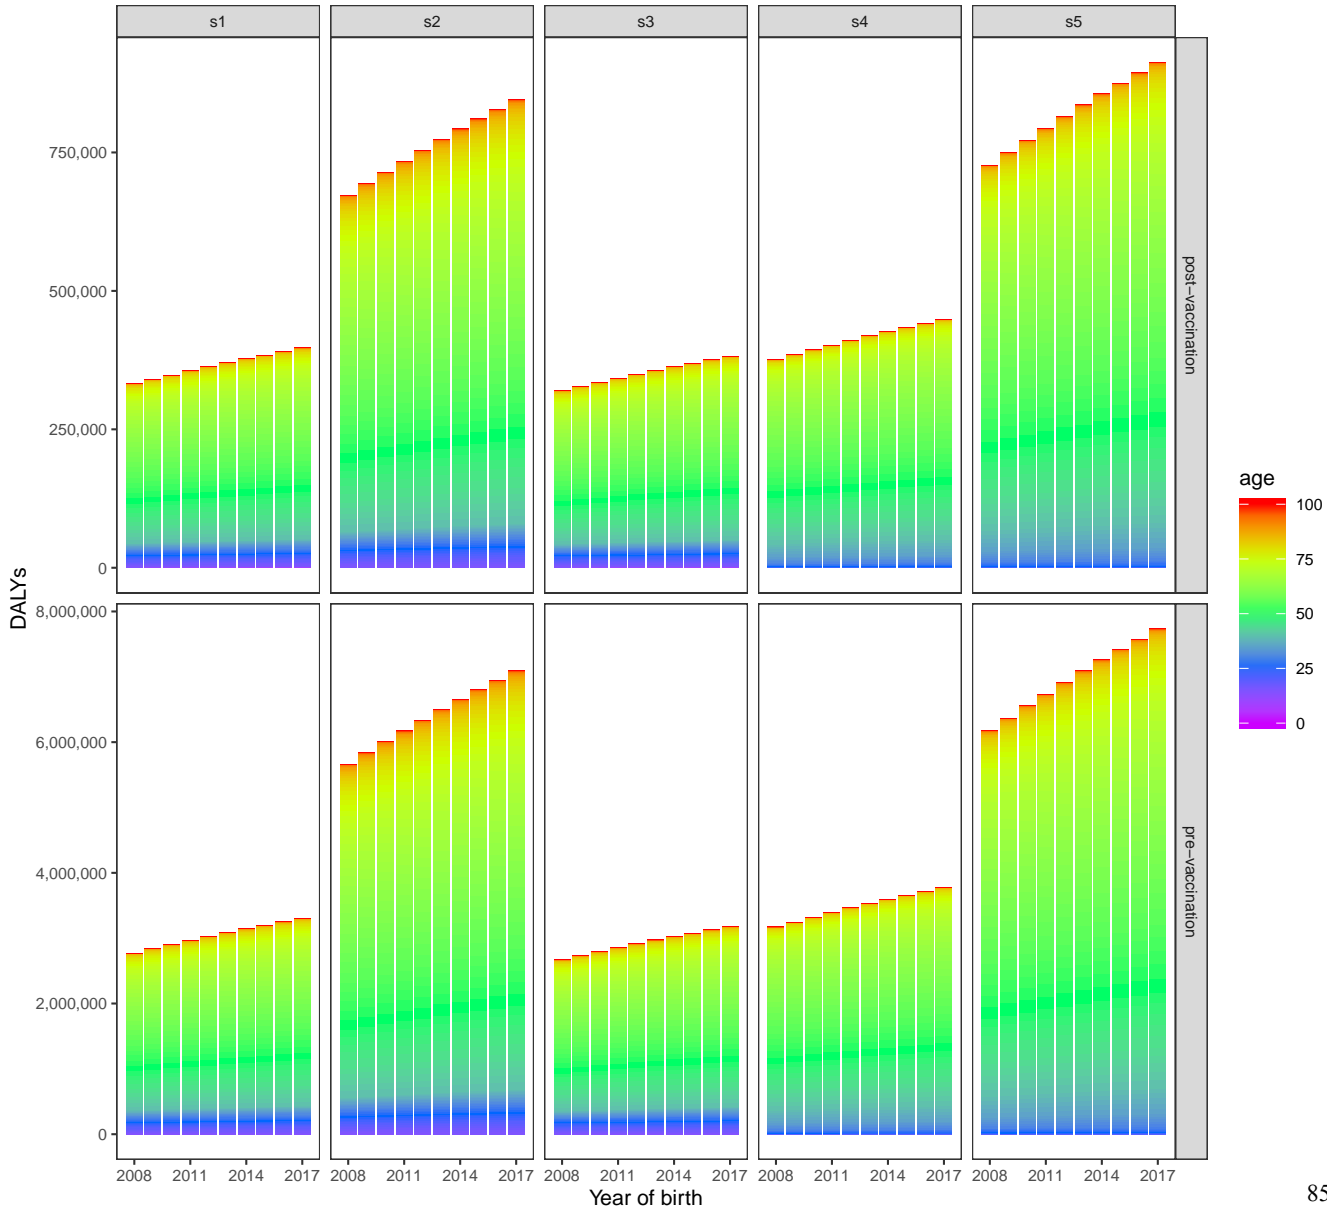

European Region  
 Lifetime burden of cervical cancer Cases  
 caused by HPV 16/18 pre- and post-vaccination  
 (vaccination age = 12 years / bivalent/quadrivalent vaccine)

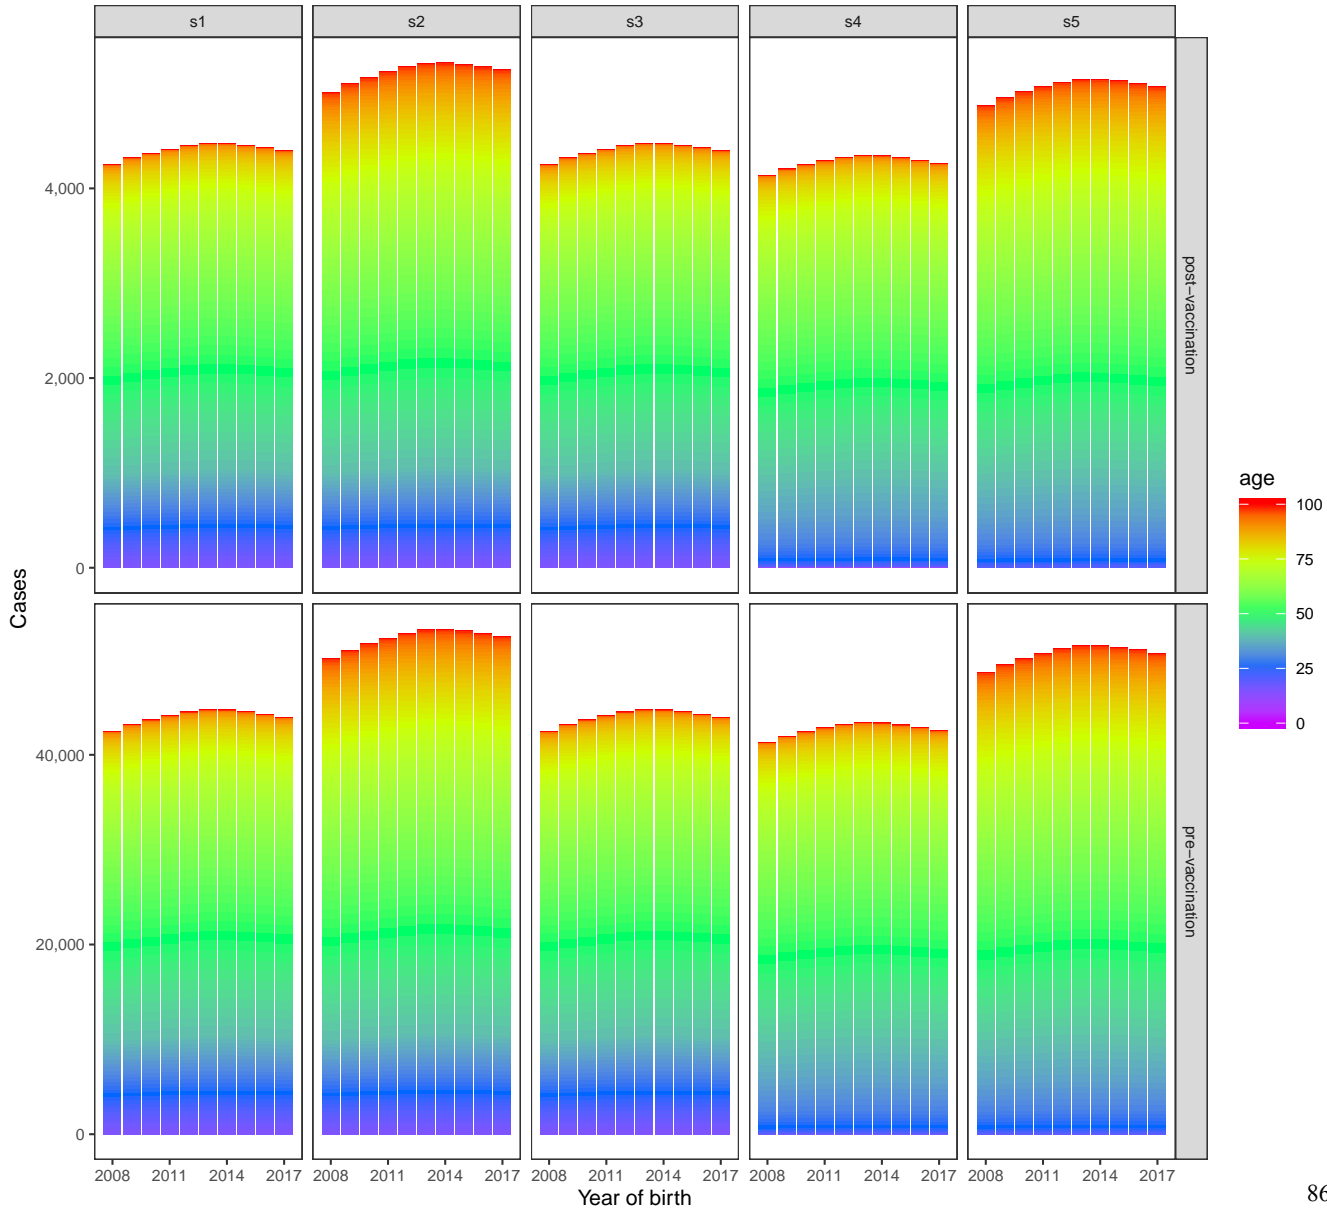

European Region  
 Lifetime burden of cervical cancer Deaths  
 caused by HPV 16/18 pre- and post-vaccination  
 (vaccination age = 12 years / bivalent/quadrivalent vaccine)

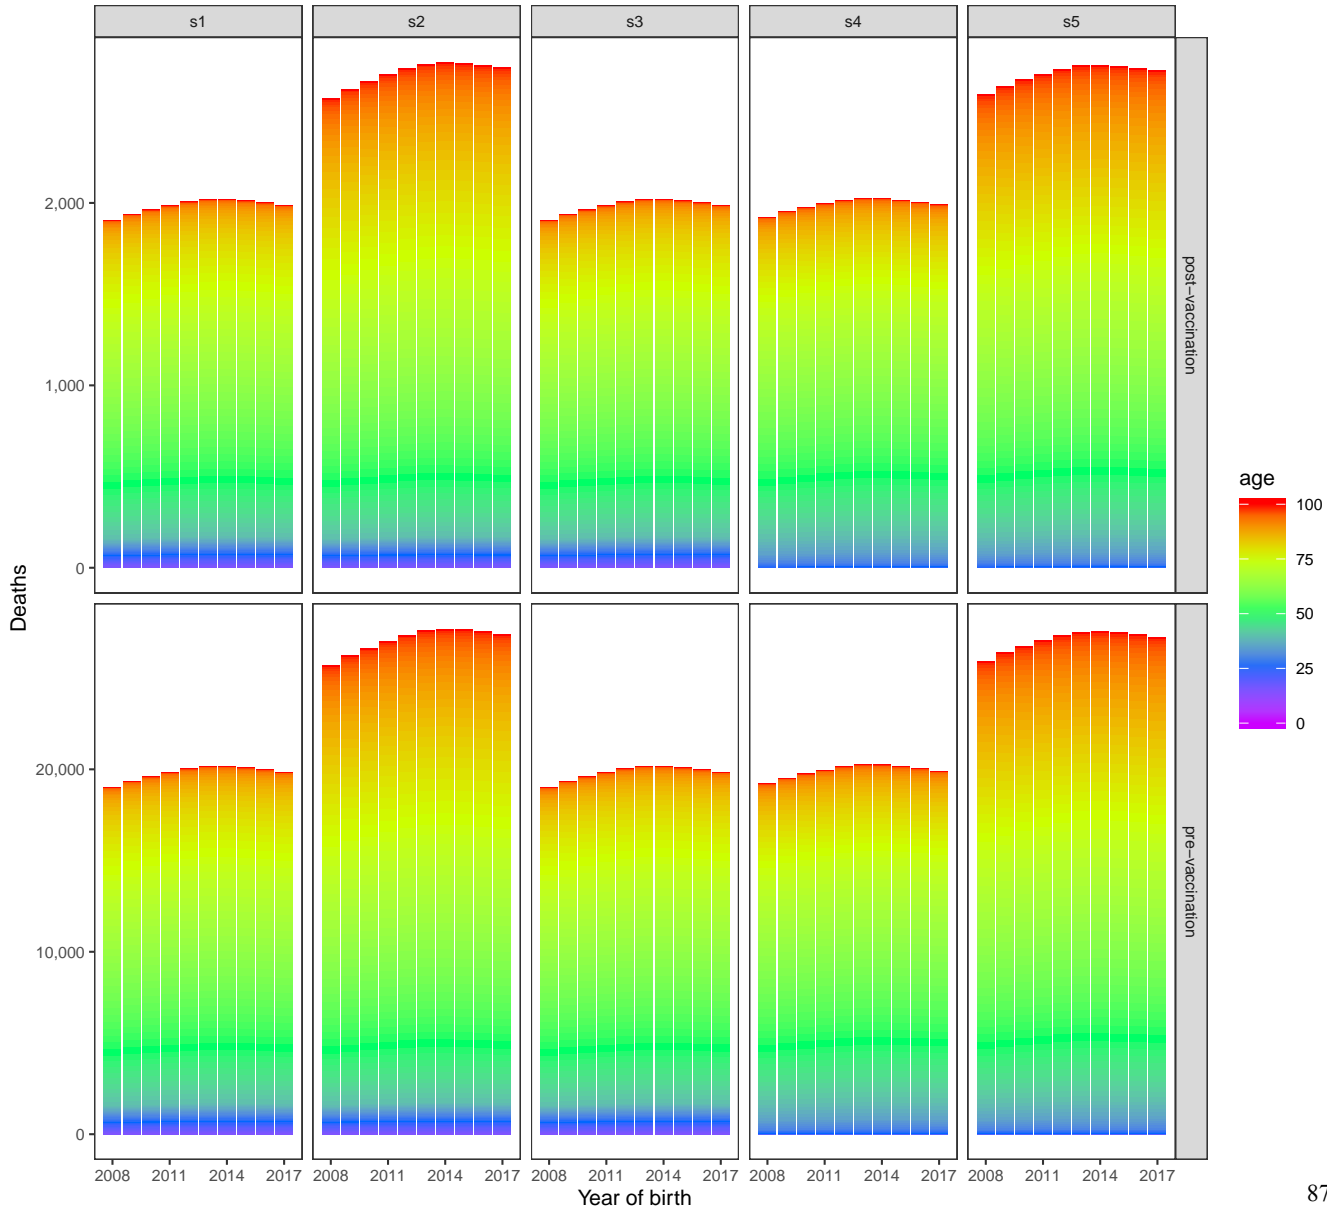

European Region  
 Lifetime burden of cervical cancer YLDs  
 caused by HPV 16/18 pre- and post-vaccination  
 (vaccination age = 12 years / bivalent/quadrivalent vaccine)

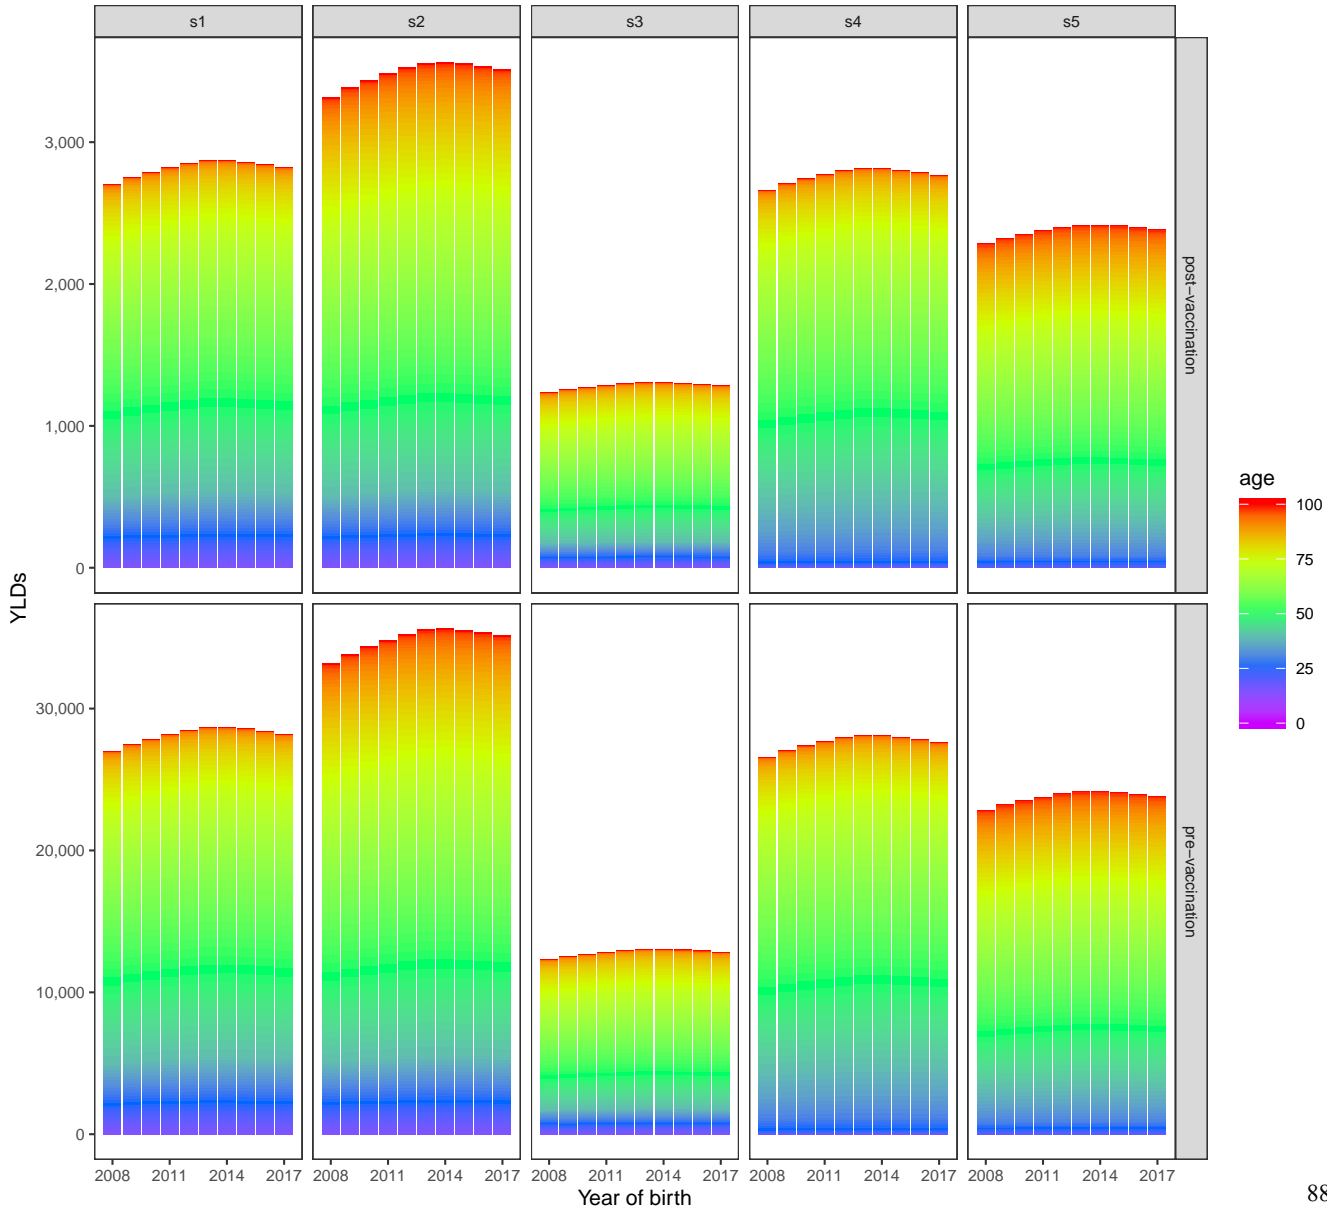

European Region  
 Lifetime burden of cervical cancer YLLs  
 caused by HPV 16/18 pre- and post-vaccination  
 (vaccination age = 12 years / bivalent/quadrivalent vaccine)

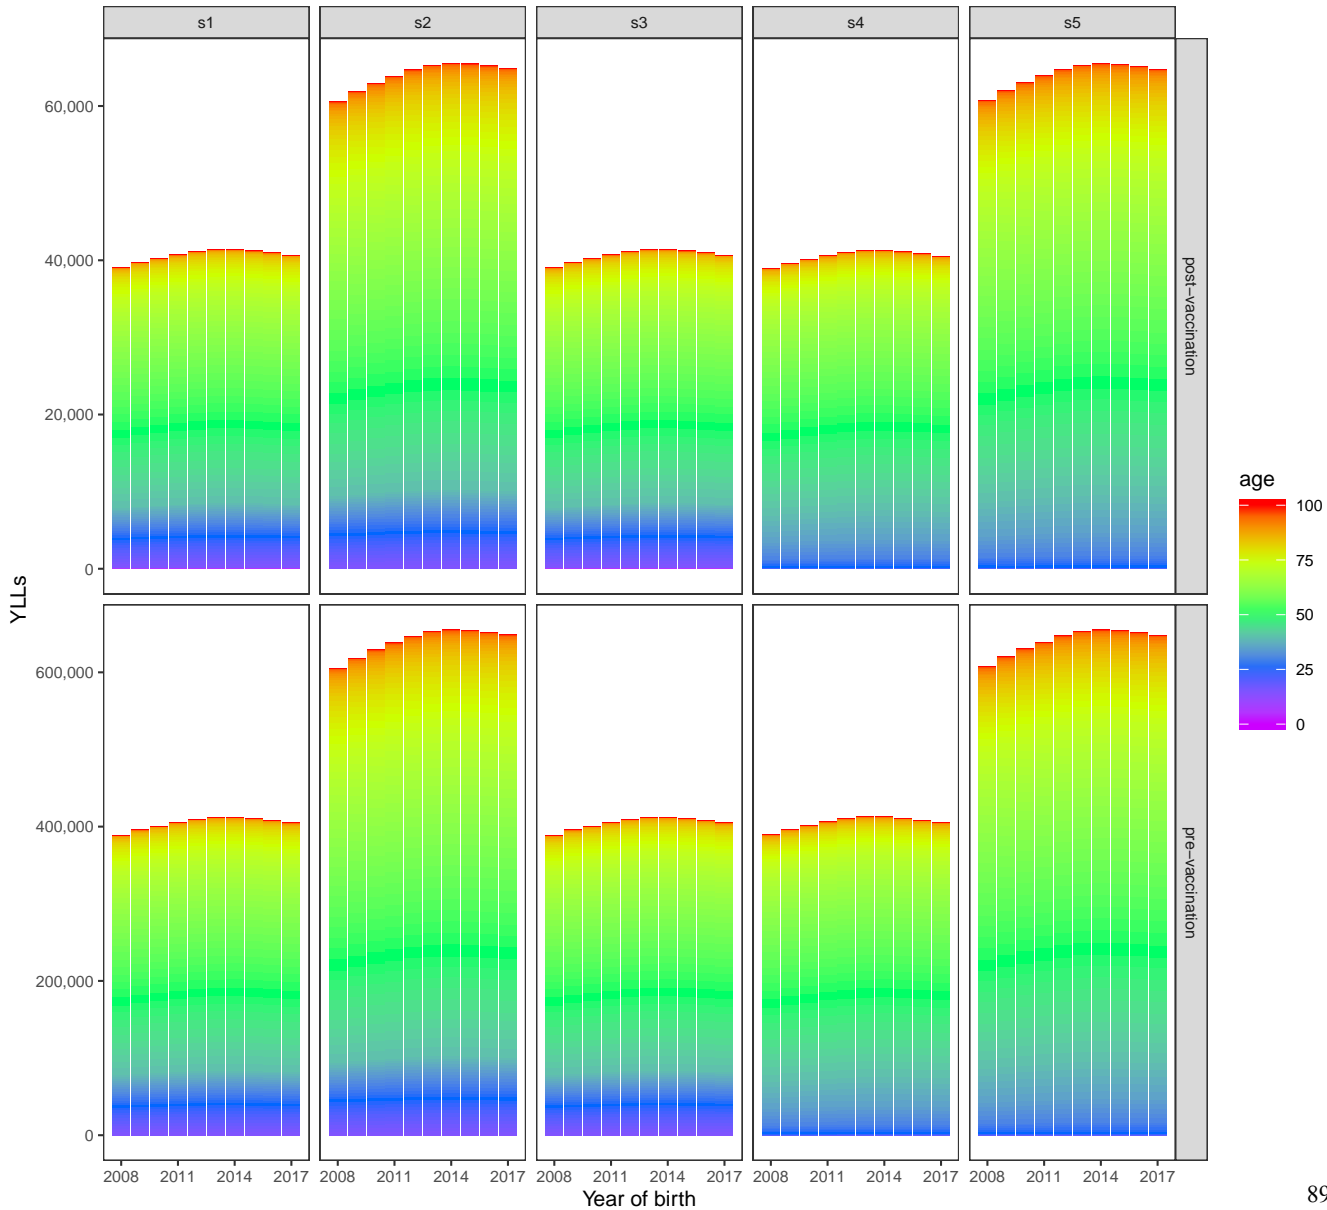



European Region  
 Lifetime burden of cervical cancer DALYs  
 caused by HPV 16/18 pre- and post-vaccination  
 (vaccination age = 12 years / bivalent/quadrivalent vaccine)

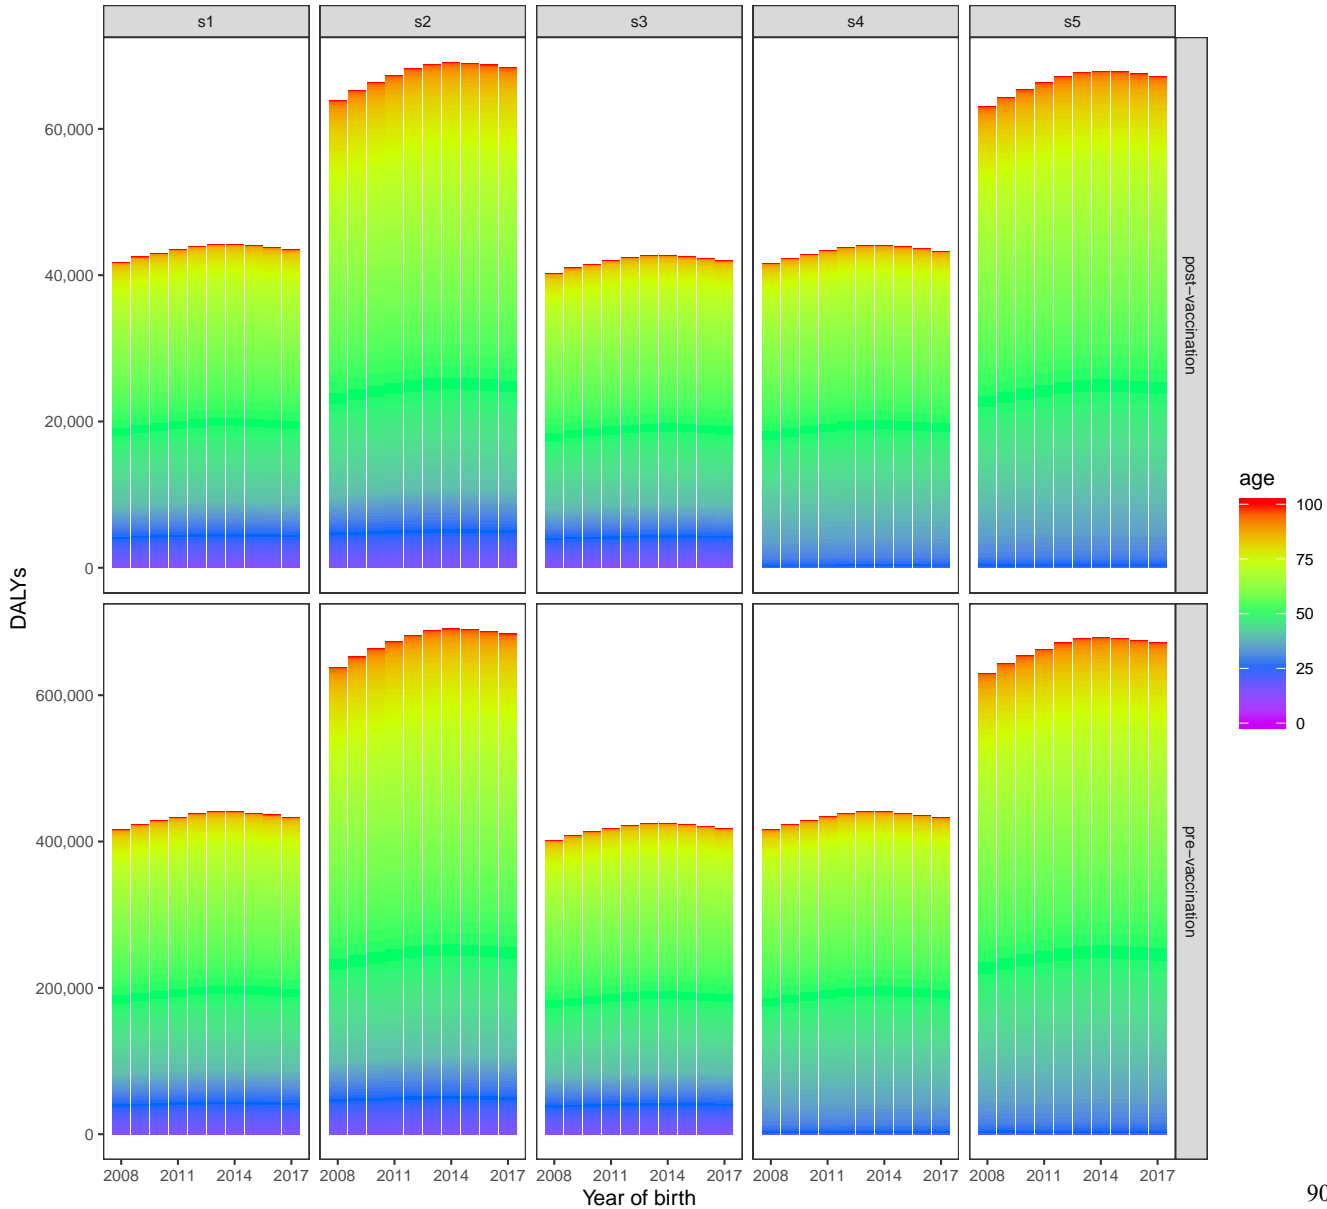

Region of the Americas  
 Lifetime burden of cervical cancer Cases  
 caused by HPV 16/18 pre- and post-vaccination  
 (vaccination age = 12 years / bivalent/quadrivalent vaccine)

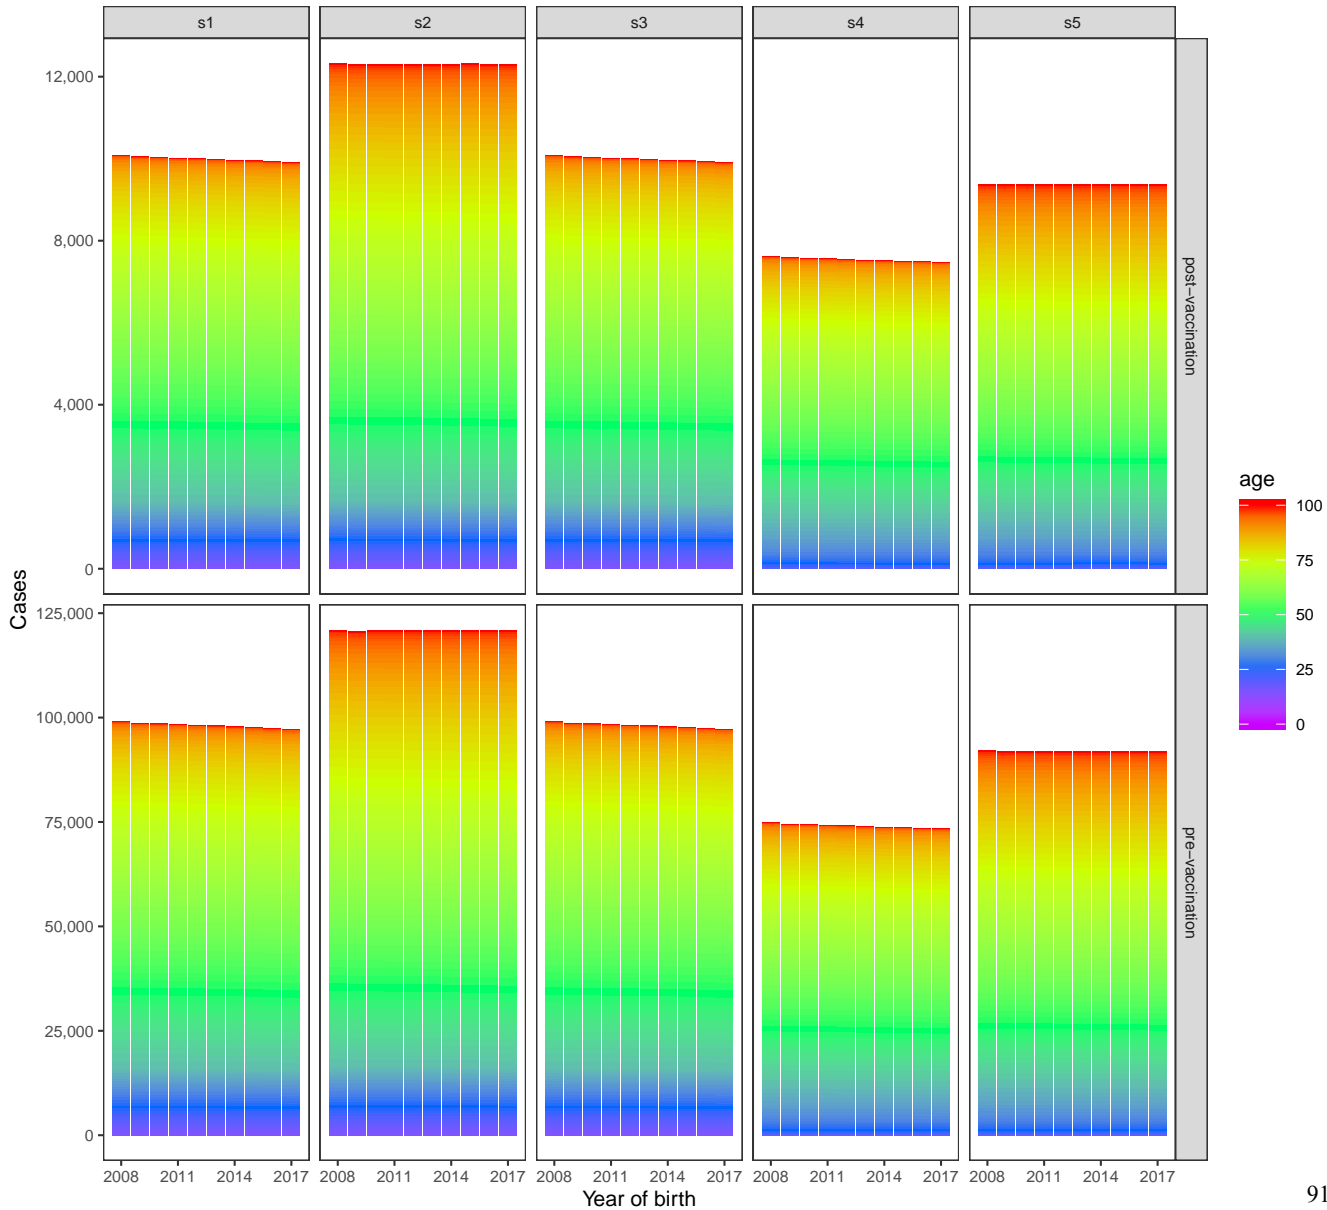

Region of the Americas  
 Lifetime burden of cervical cancer Deaths  
 caused by HPV 16/18 pre- and post-vaccination  
 (vaccination age = 12 years / bivalent/quadrivalent vaccine)

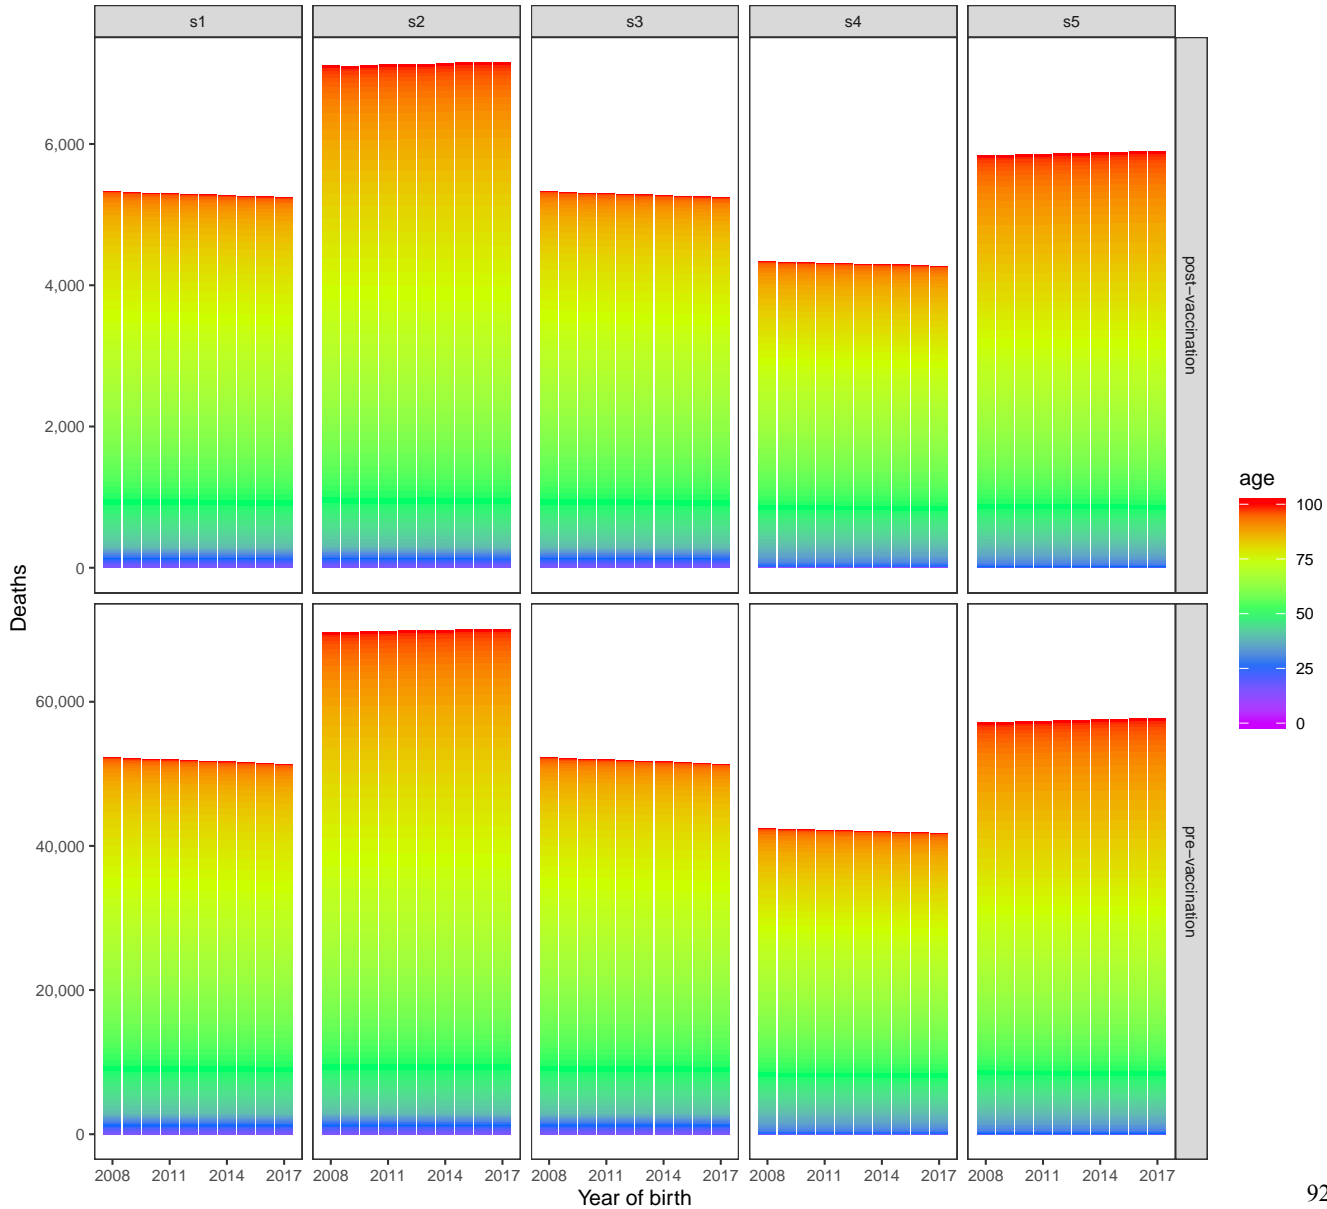

Region of the Americas  
 Lifetime burden of cervical cancer YLDs  
 caused by HPV 16/18 pre- and post-vaccination  
 (vaccination age = 12 years / bivalent/quadrivalent vaccine)

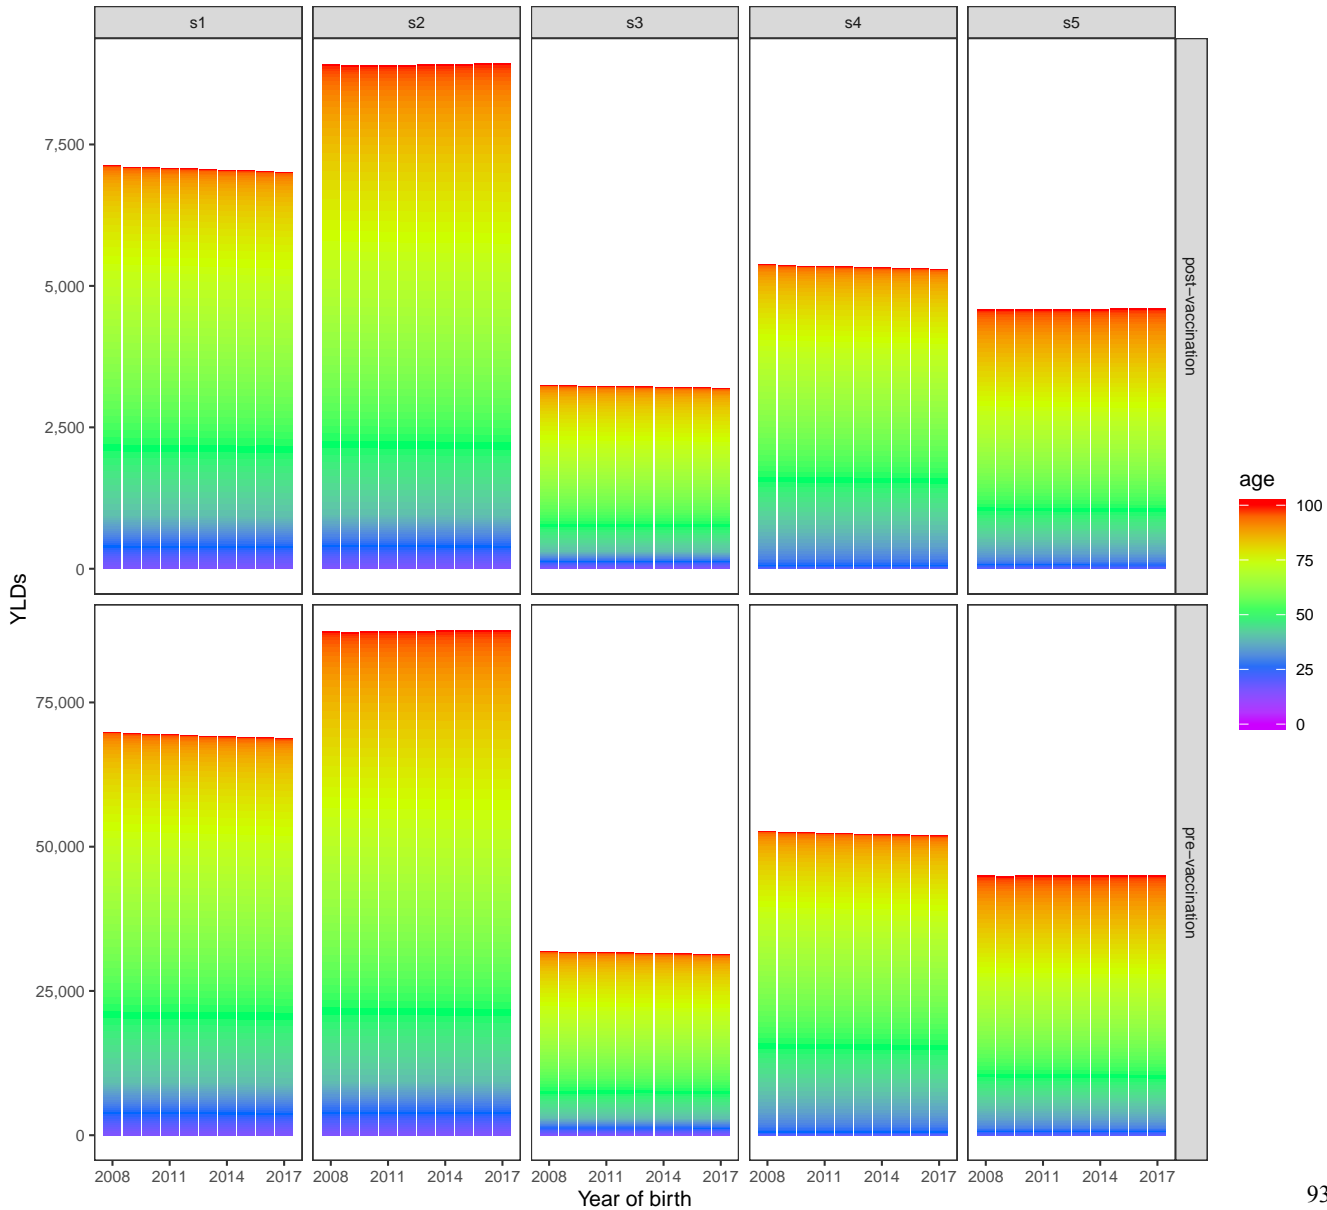

Region of the Americas  
 Lifetime burden of cervical cancer YLLs  
 caused by HPV 16/18 pre- and post-vaccination  
 (vaccination age = 12 years / bivalent/quadrivalent vaccine)

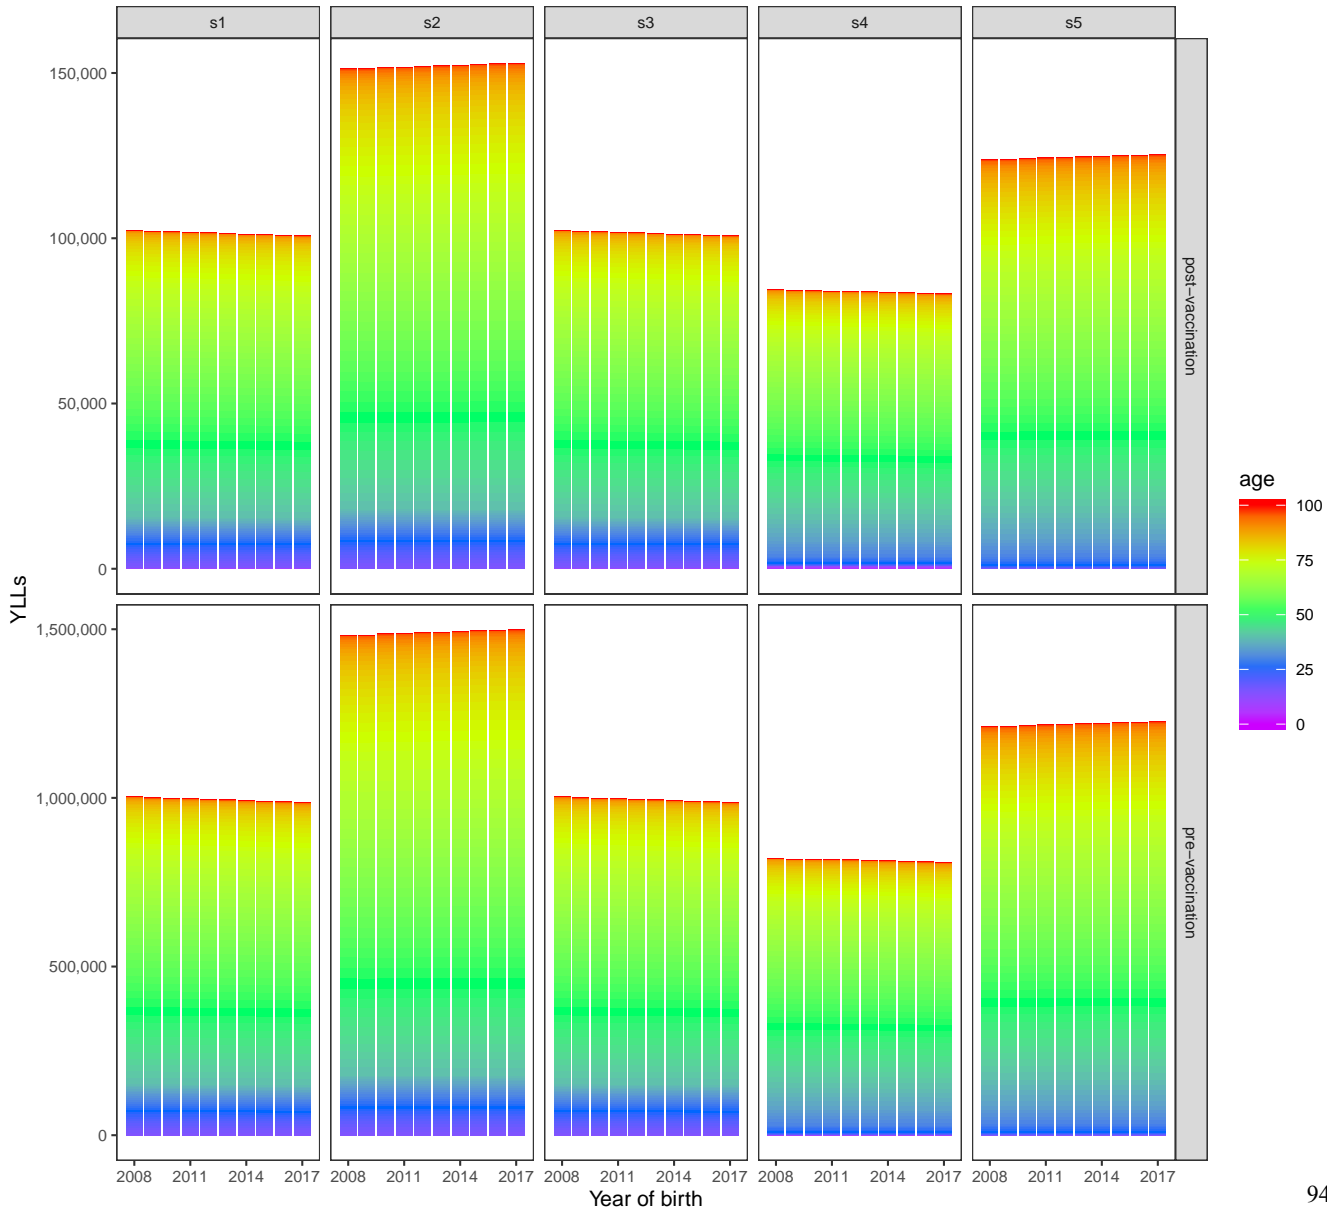

Region of the Americas  
 Lifetime burden of cervical cancer DALYs  
 caused by HPV 16/18 pre- and post-vaccination  
 (vaccination age = 12 years / bivalent/quadrivalent vaccine)

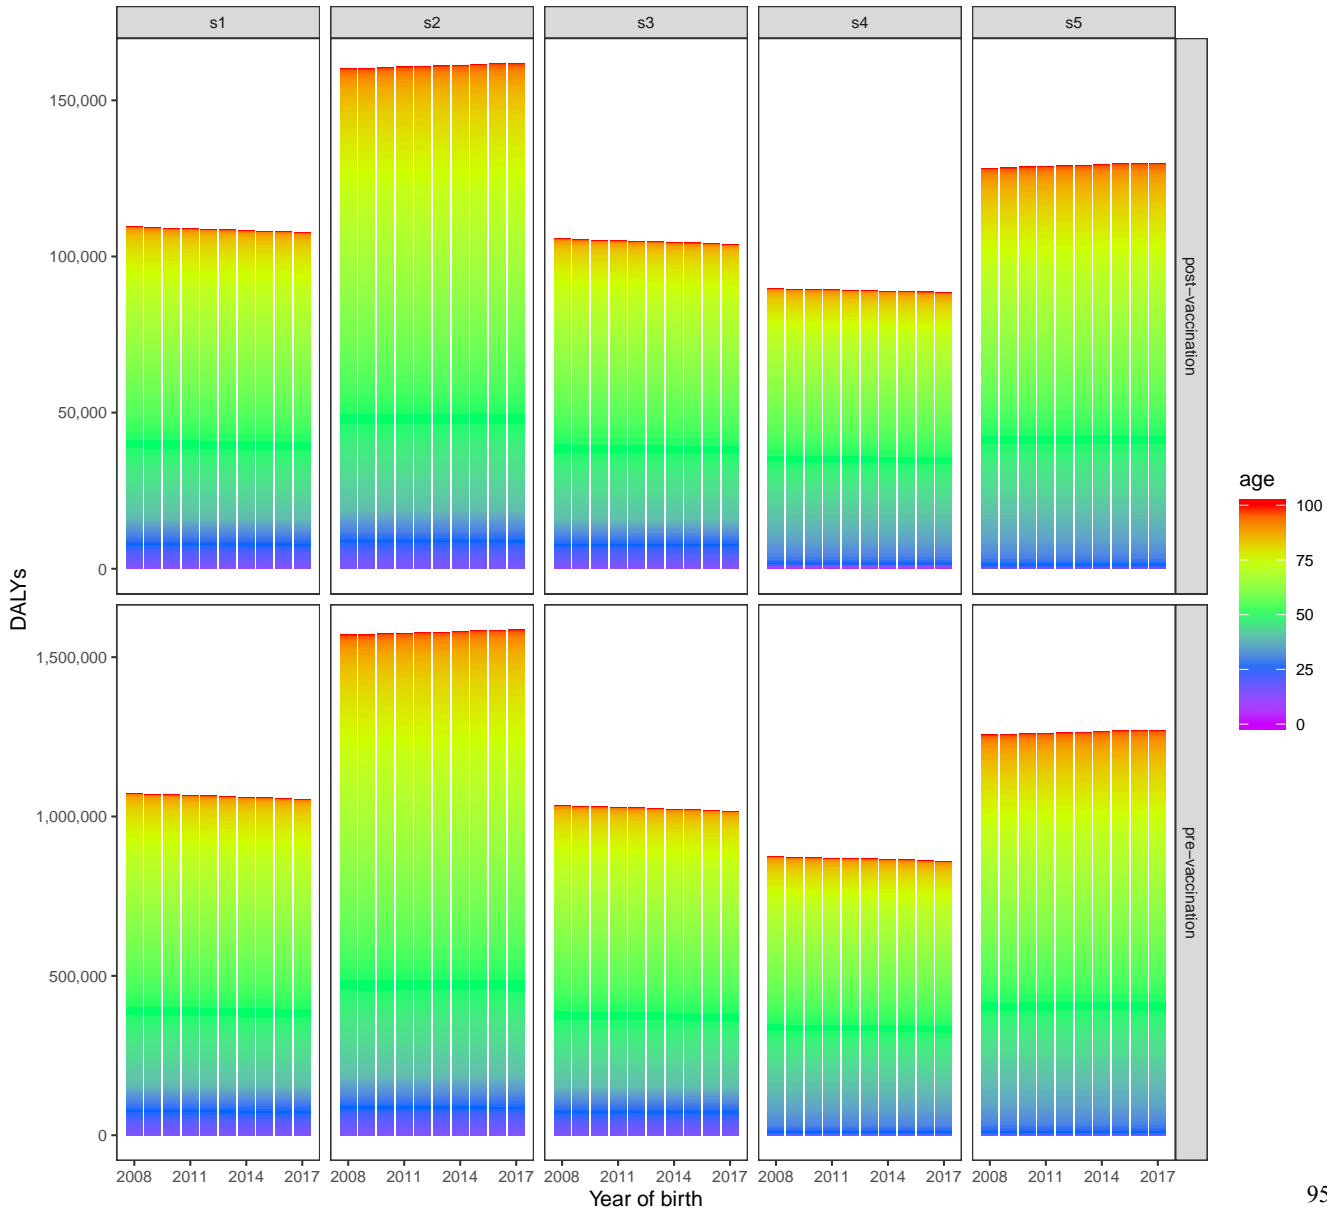

Western Pacific Region  
 Lifetime burden of cervical cancer Cases  
 caused by HPV 16/18 pre- and post-vaccination  
 (vaccination age = 12 years / bivalent/quadrivalent vaccine)

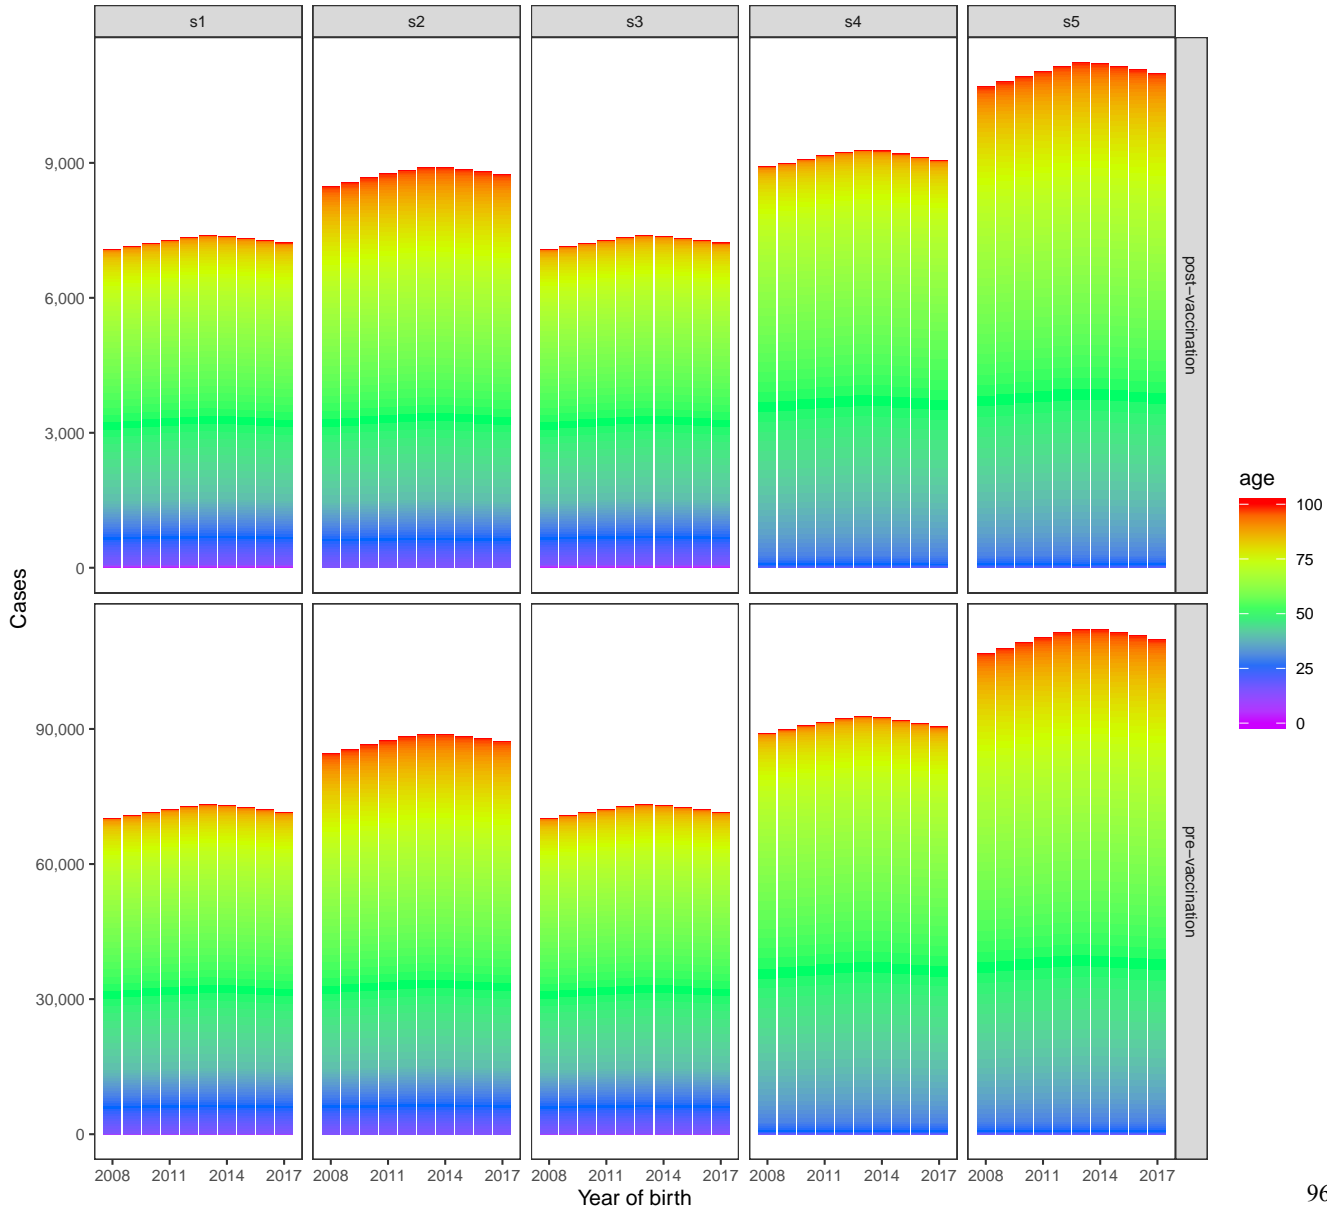

Western Pacific Region  
 Lifetime burden of cervical cancer Deaths  
 caused by HPV 16/18 pre- and post-vaccination  
 (vaccination age = 12 years / bivalent/quadrivalent vaccine)

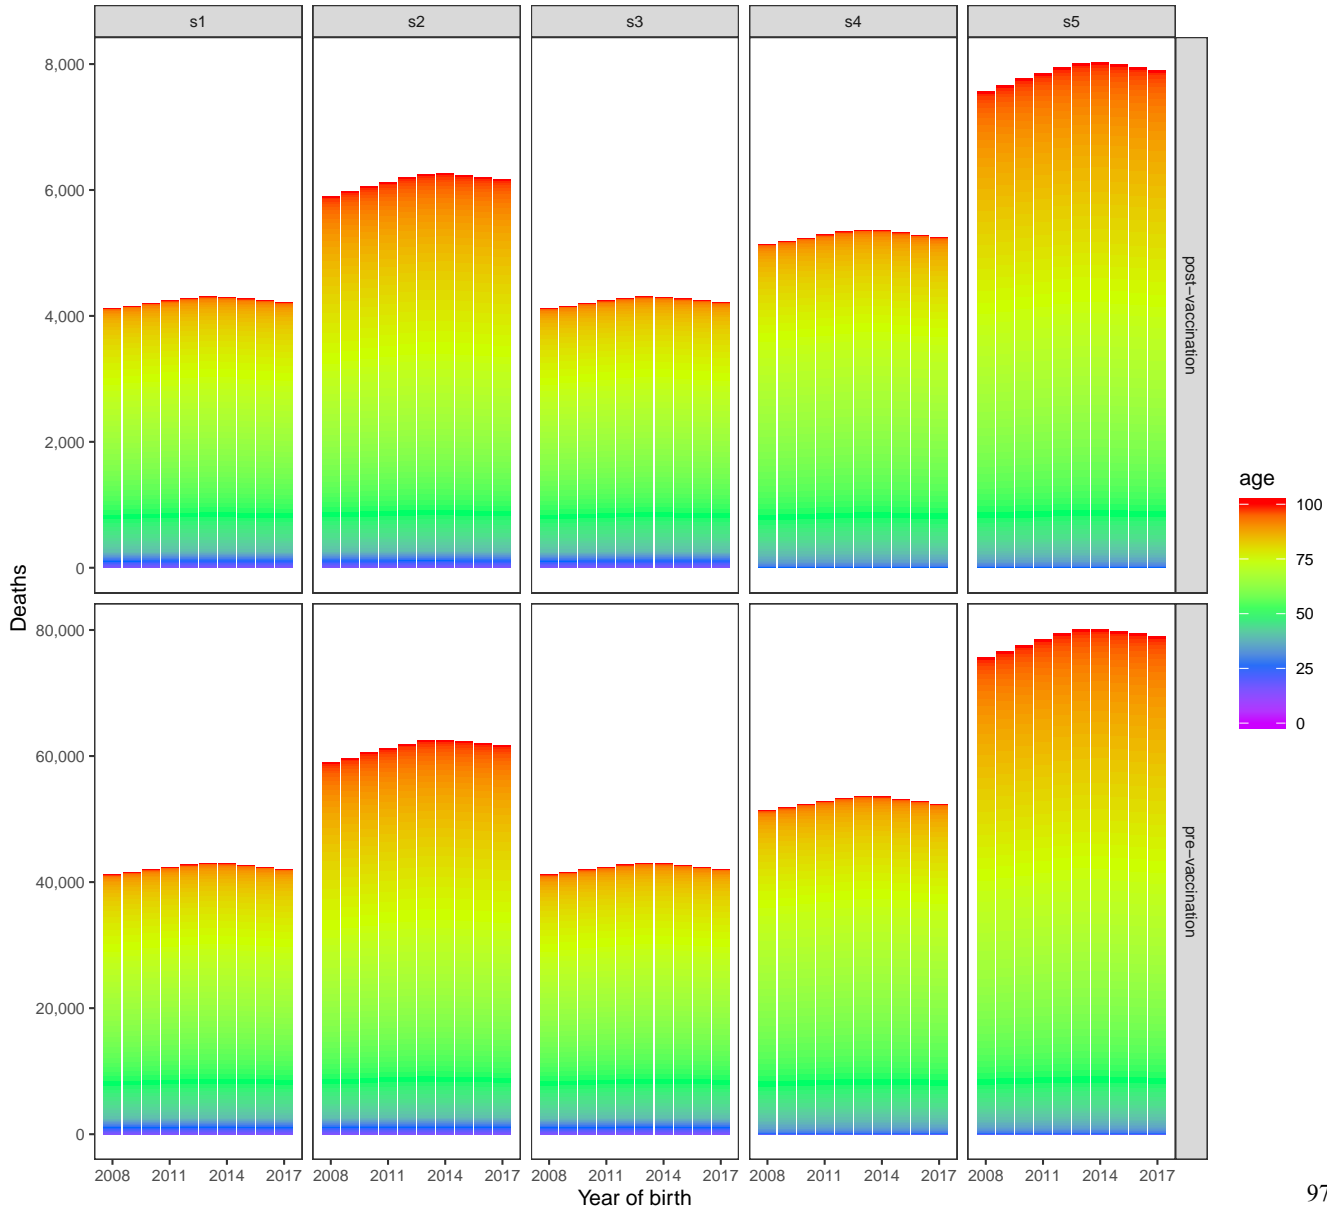



Western Pacific Region  
 Lifetime burden of cervical cancer YLDs  
 caused by HPV 16/18 pre- and post-vaccination  
 (vaccination age = 12 years / bivalent/quadrivalent vaccine)

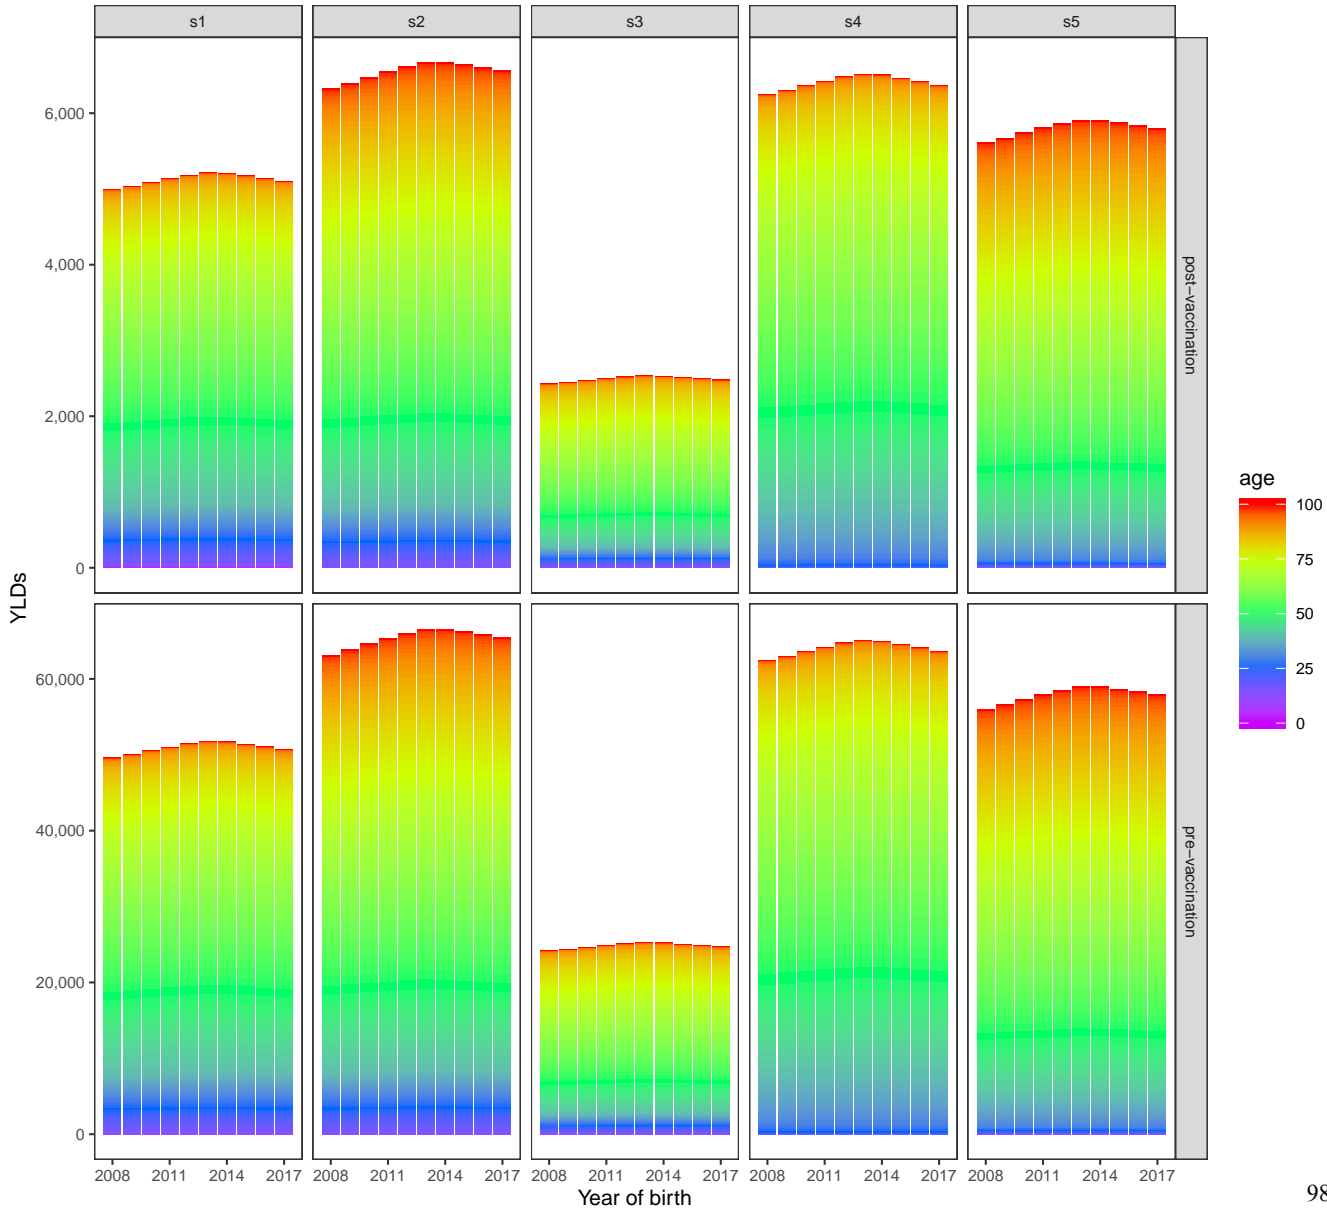

Western Pacific Region  
 Lifetime burden of cervical cancer YLLs  
 caused by HPV 16/18 pre- and post-vaccination  
 (vaccination age = 12 years / bivalent/quadrivalent vaccine)

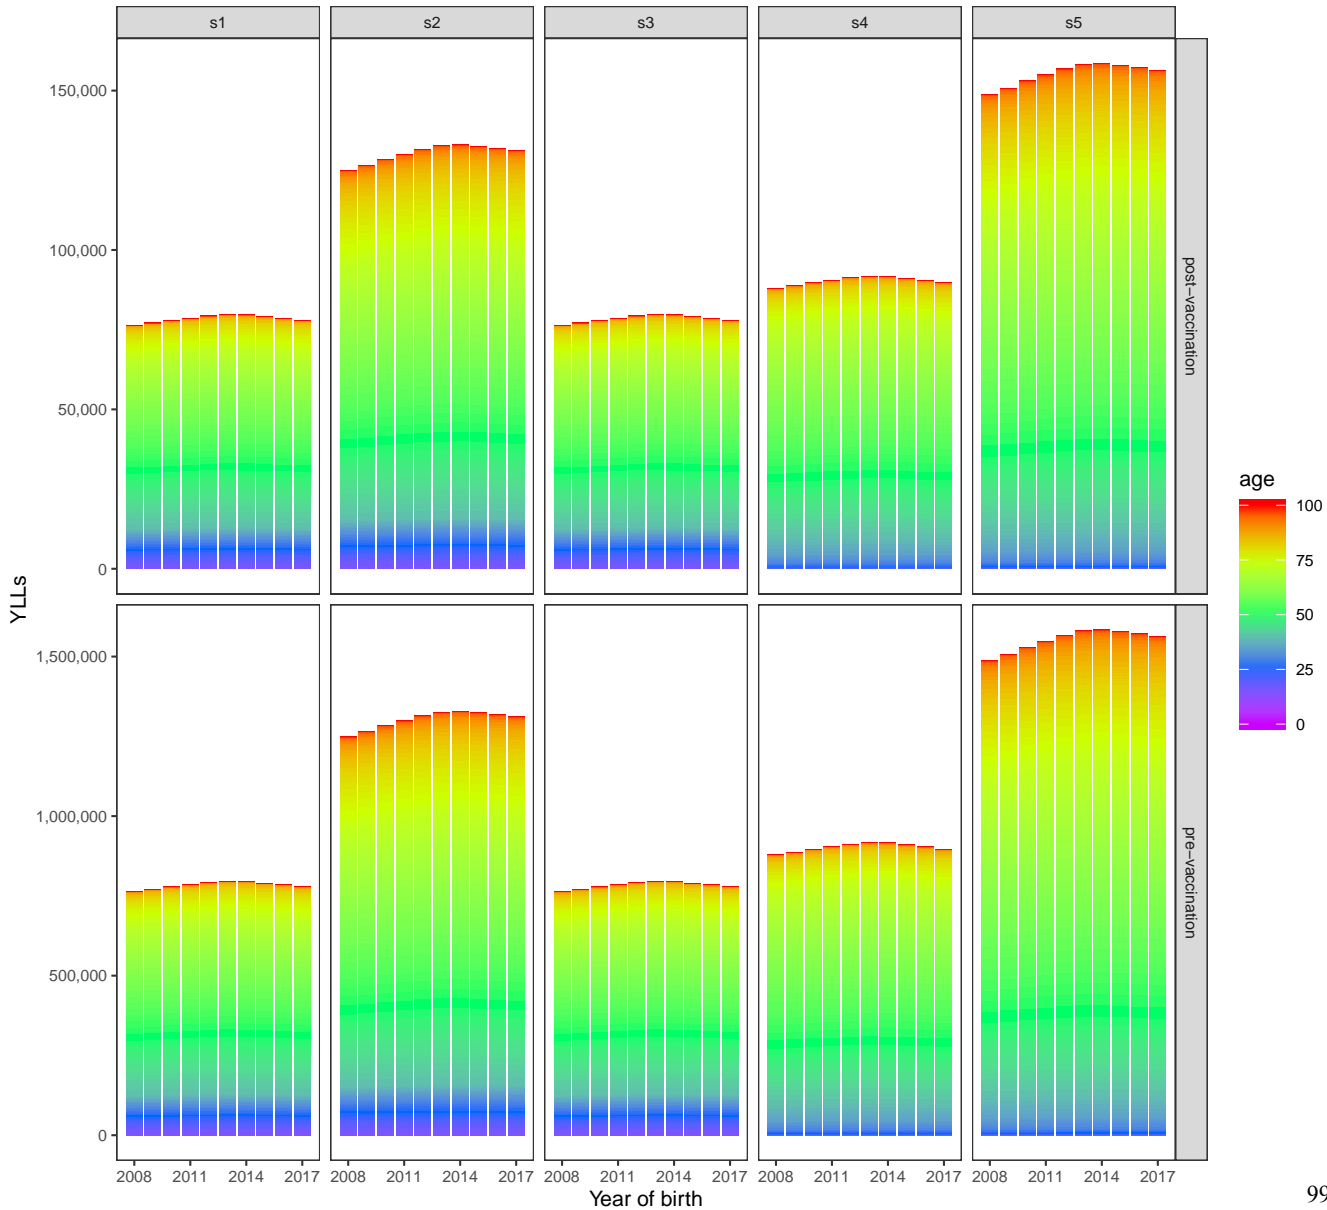

Western Pacific Region  
 Lifetime burden of cervical cancer DALYs  
 caused by HPV 16/18 pre- and post-vaccination  
 (vaccination age = 12 years / bivalent/quadrivalent vaccine)

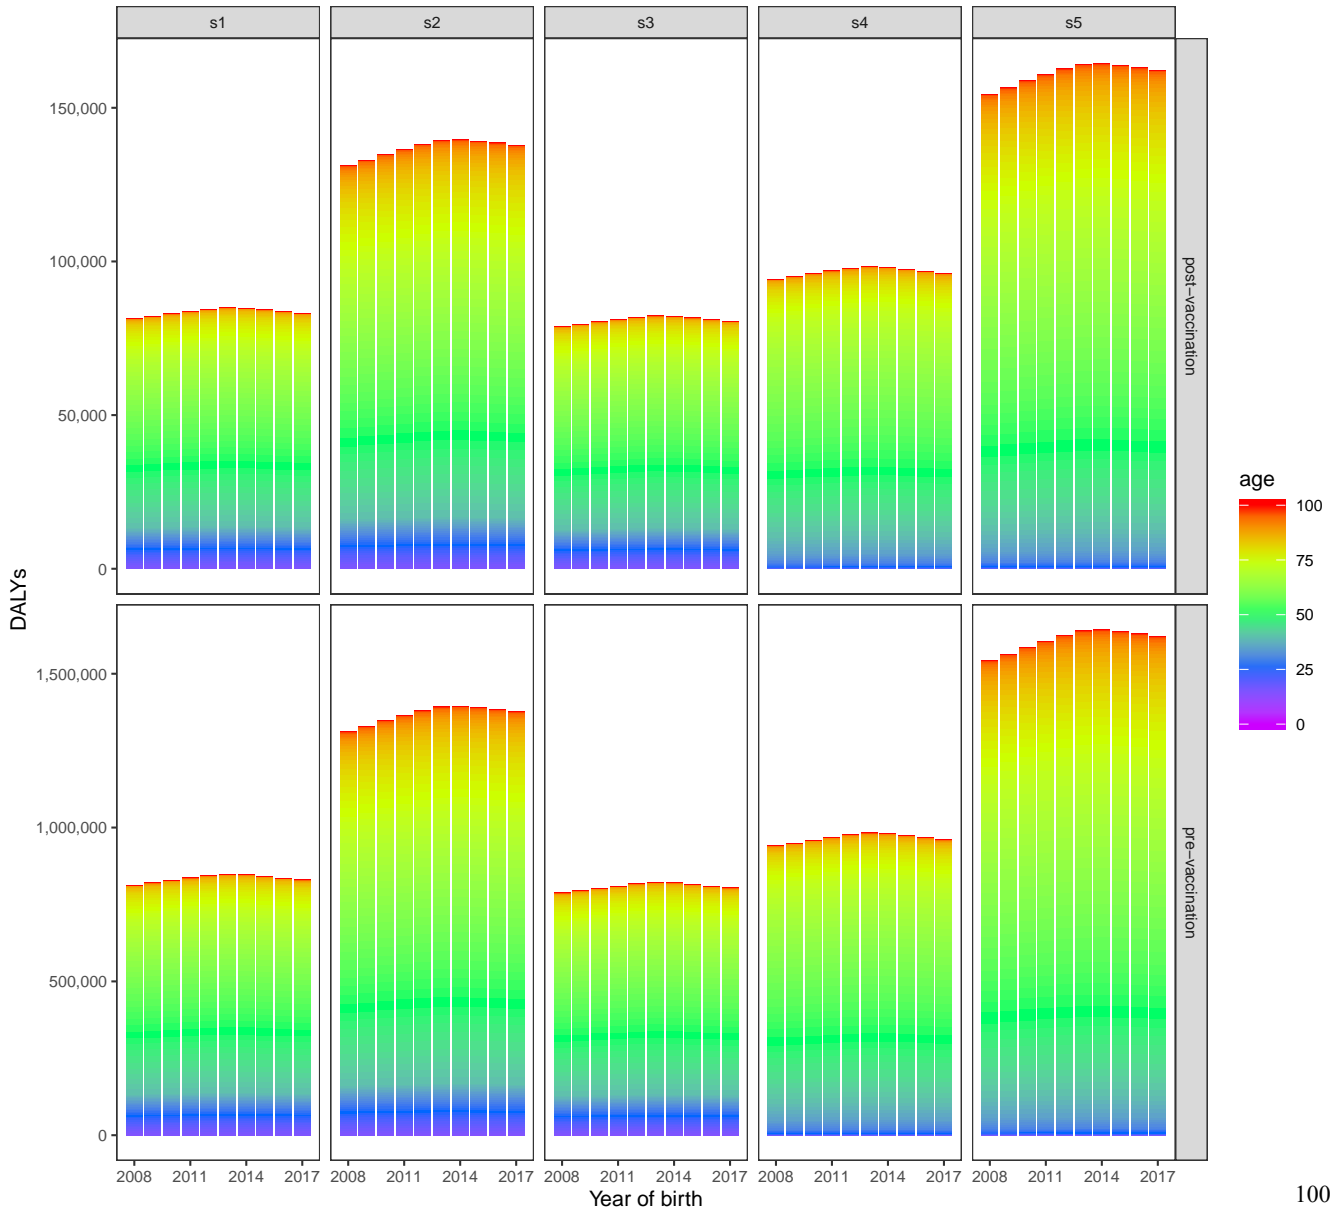

South-East Asia Region  
 Lifetime burden of cervical cancer Cases  
 caused by HPV 16/18 pre- and post-vaccination  
 (vaccination age = 12 years / bivalent/quadrivalent vaccine)

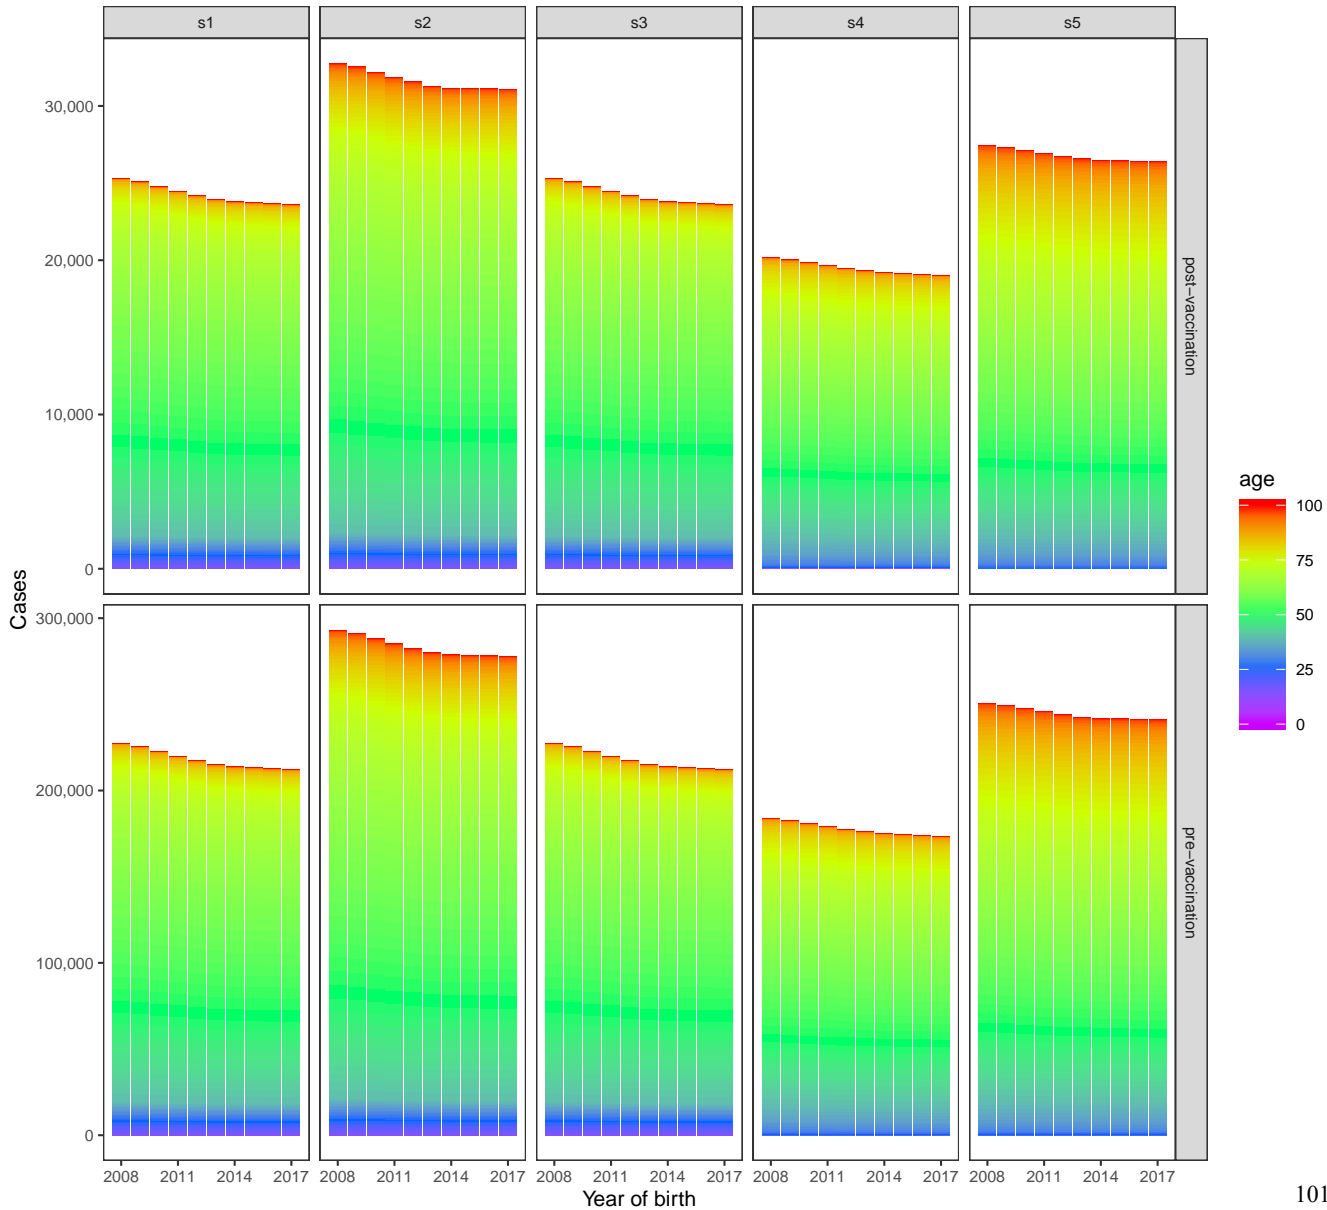

South-East Asia Region  
 Lifetime burden of cervical cancer Deaths  
 caused by HPV 16/18 pre- and post-vaccination  
 (vaccination age = 12 years / bivalent/quadrivalent vaccine)

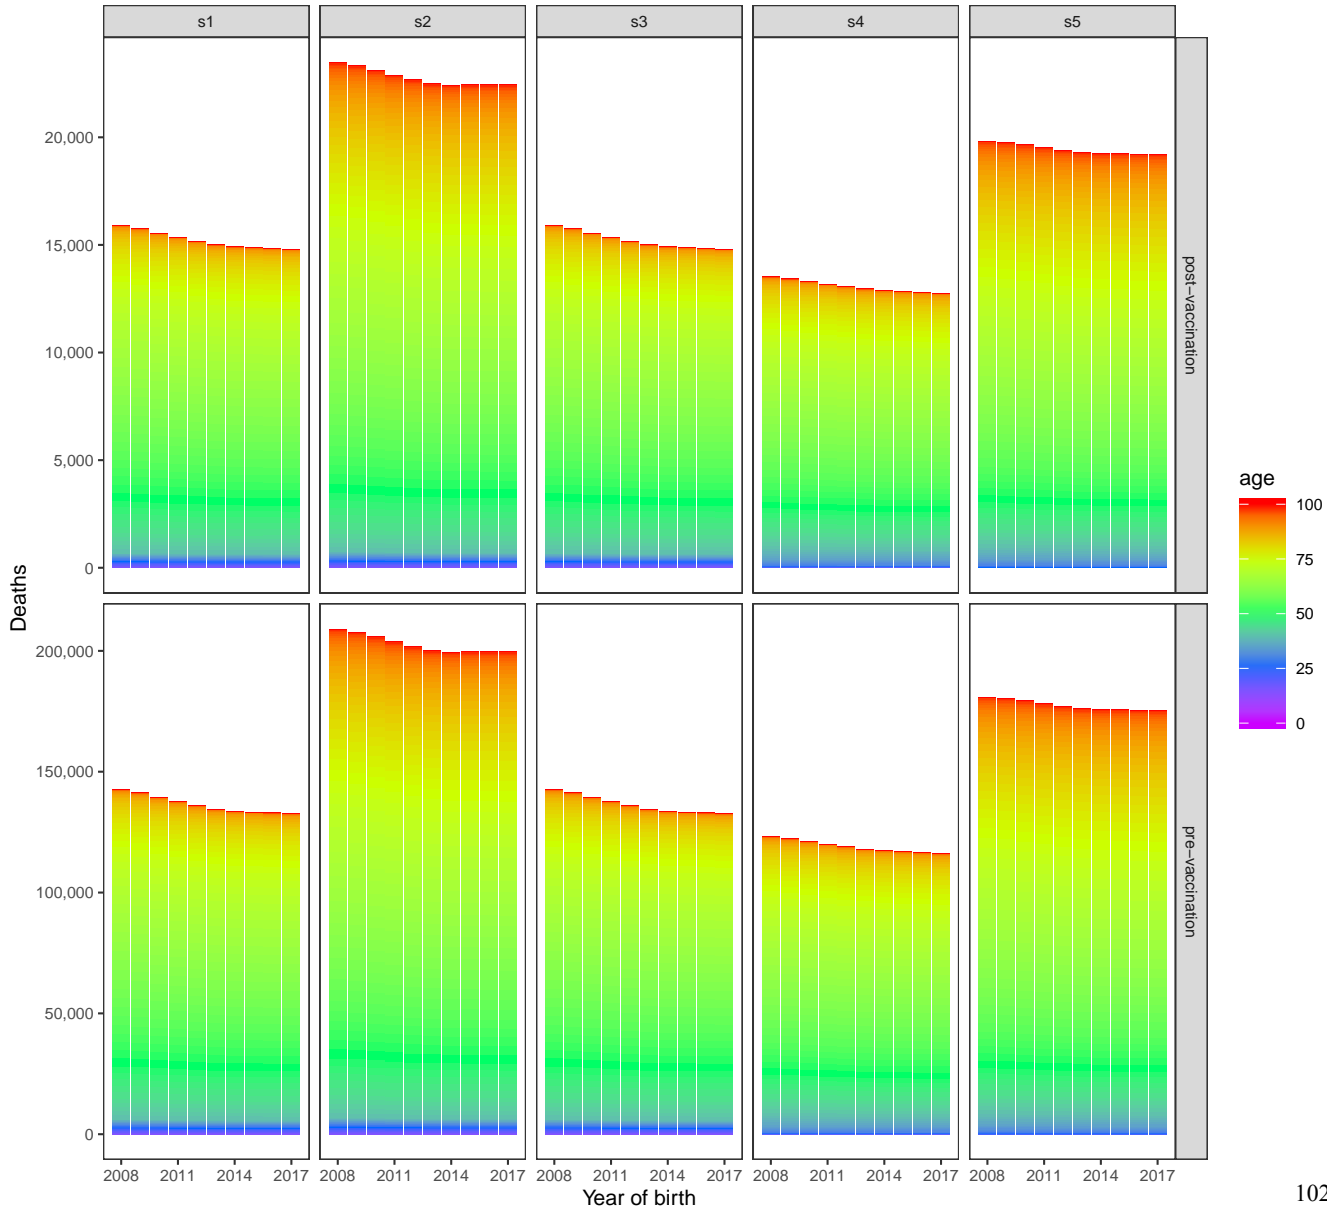

South-East Asia Region  
 Lifetime burden of cervical cancer YLDs  
 caused by HPV 16/18 pre- and post-vaccination  
 (vaccination age = 12 years / bivalent/quadrivalent vaccine)

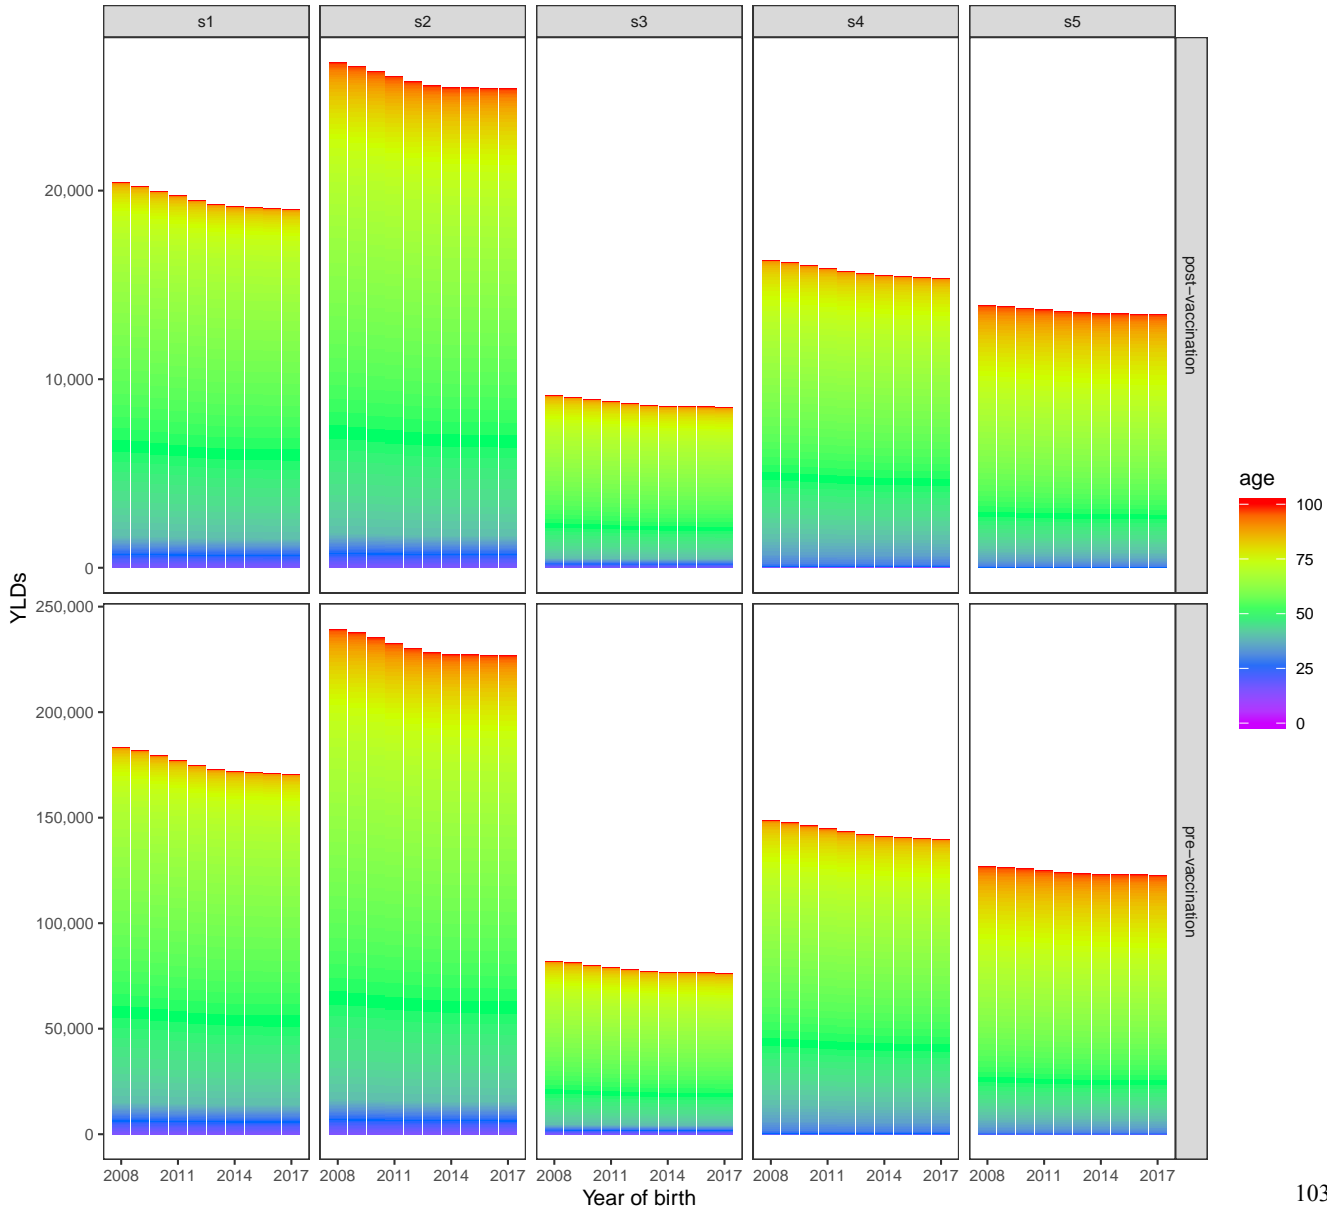

South-East Asia Region  
 Lifetime burden of cervical cancer YLLs  
 caused by HPV 16/18 pre- and post-vaccination  
 (vaccination age = 12 years / bivalent/quadrivalent vaccine)

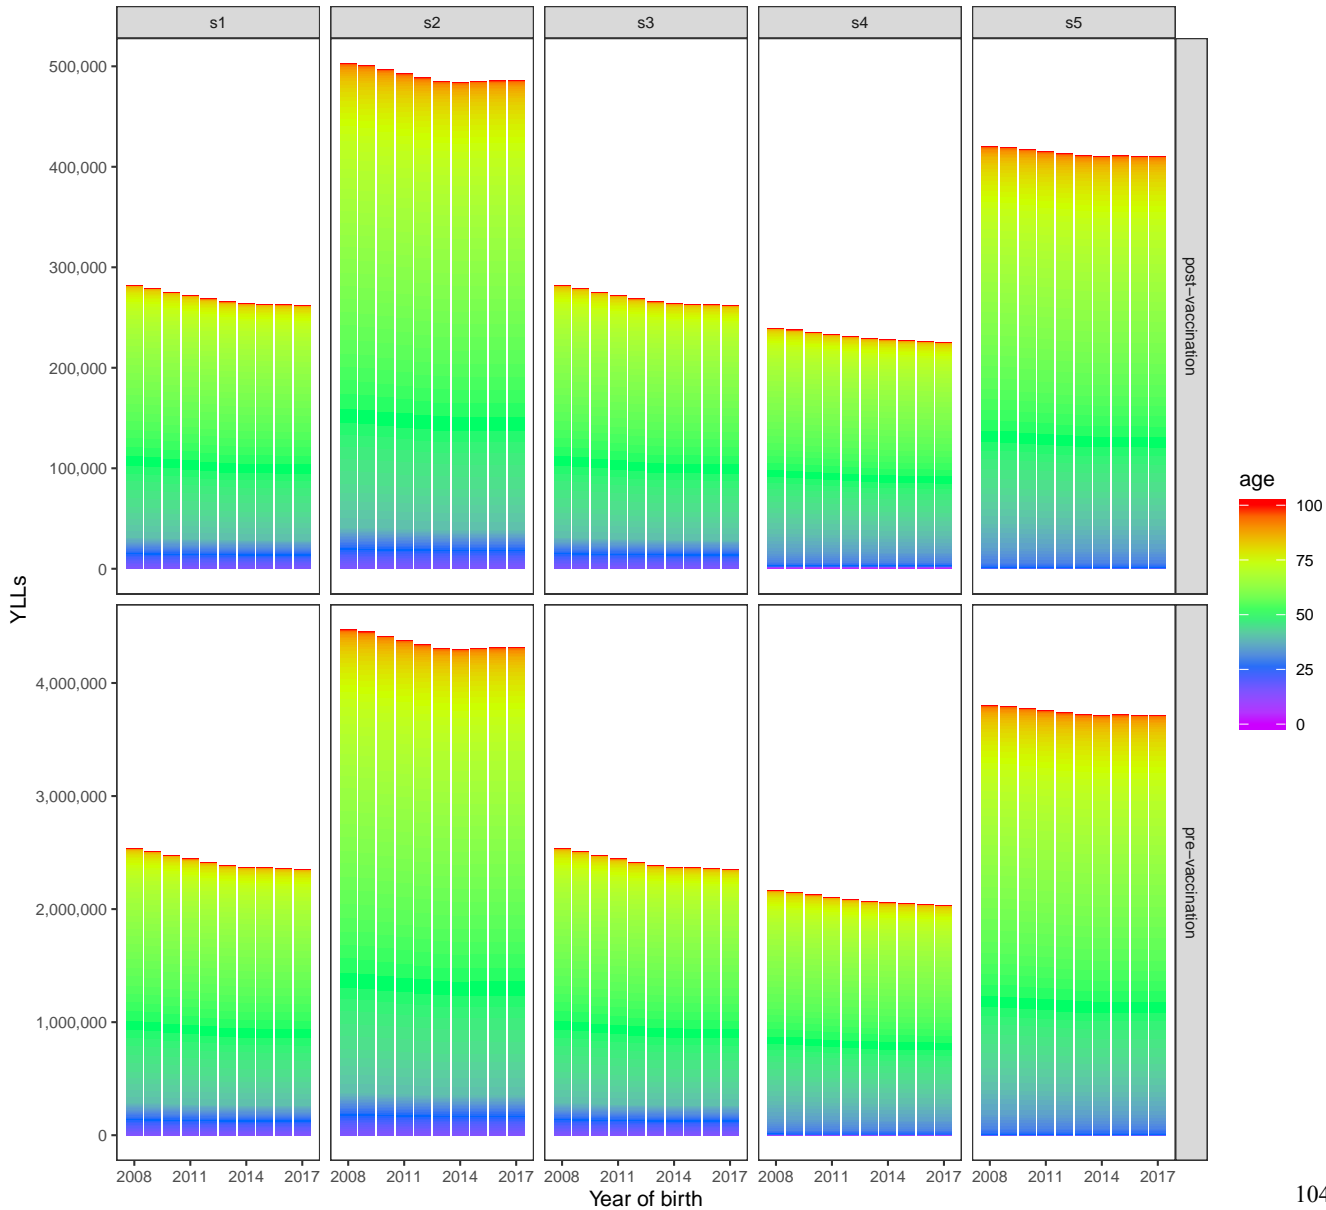

South-East Asia Region  
 Lifetime burden of cervical cancer DALYs  
 caused by HPV 16/18 pre- and post-vaccination  
 (vaccination age = 12 years / bivalent/quadrivalent vaccine)

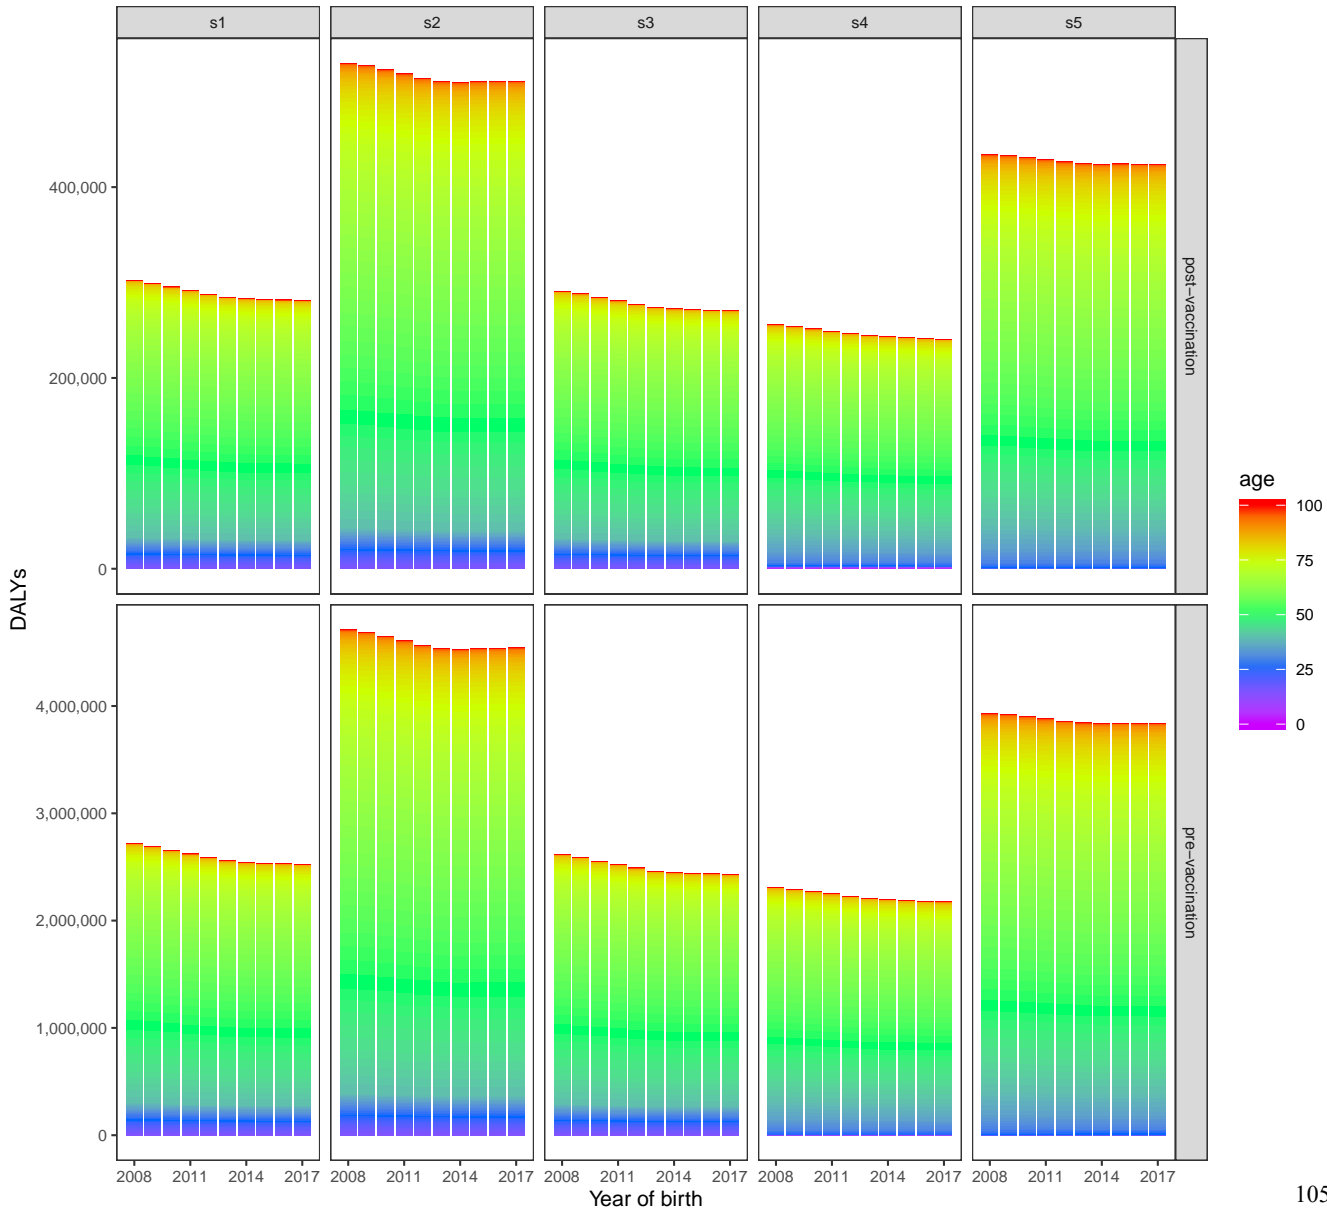



Eastern Mediterranean Region  
 Lifetime burden of cervical cancer Cases  
 caused by HPV 16/18/31/33/45/52/58 pre- and post-vaccination  
 (vaccination age = 12 years / nonavalent vaccine)

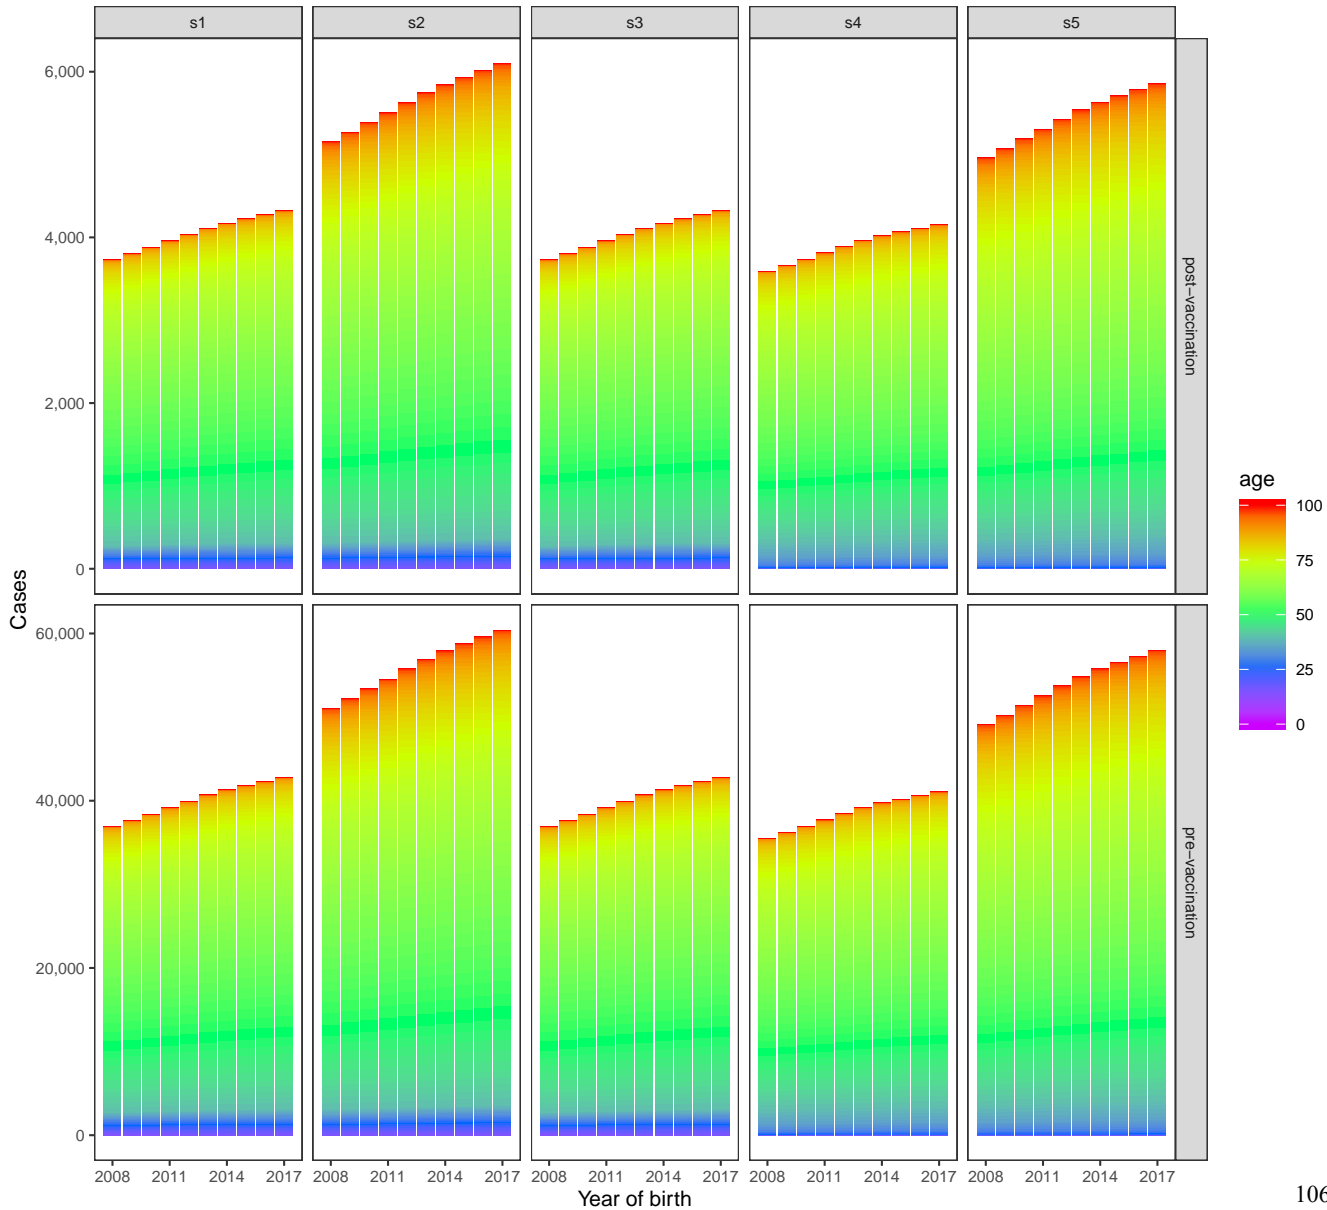

Eastern Mediterranean Region  
 Lifetime burden of cervical cancer Deaths  
 caused by HPV 16/18/31/33/45/52/58 pre- and post-vaccination  
 (vaccination age = 12 years / nonavalent vaccine)

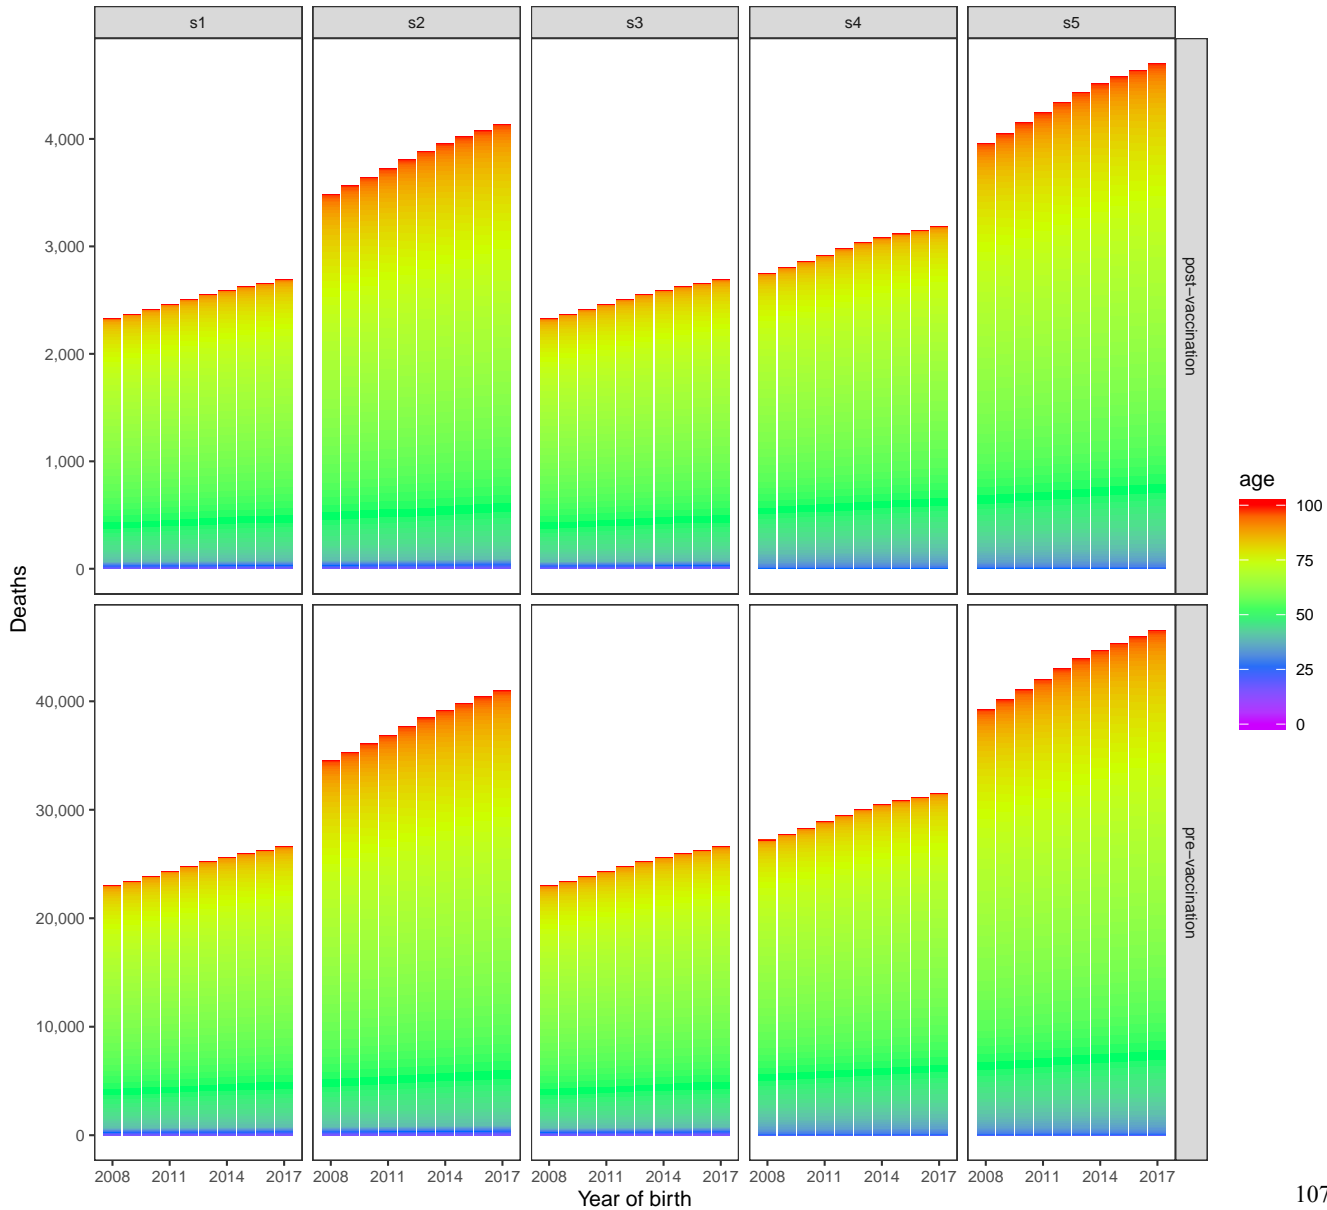

Eastern Mediterranean Region  
 Lifetime burden of cervical cancer YLDs  
 caused by HPV 16/18/31/33/45/52/58 pre- and post-vaccination  
 (vaccination age = 12 years / nonavalent vaccine)

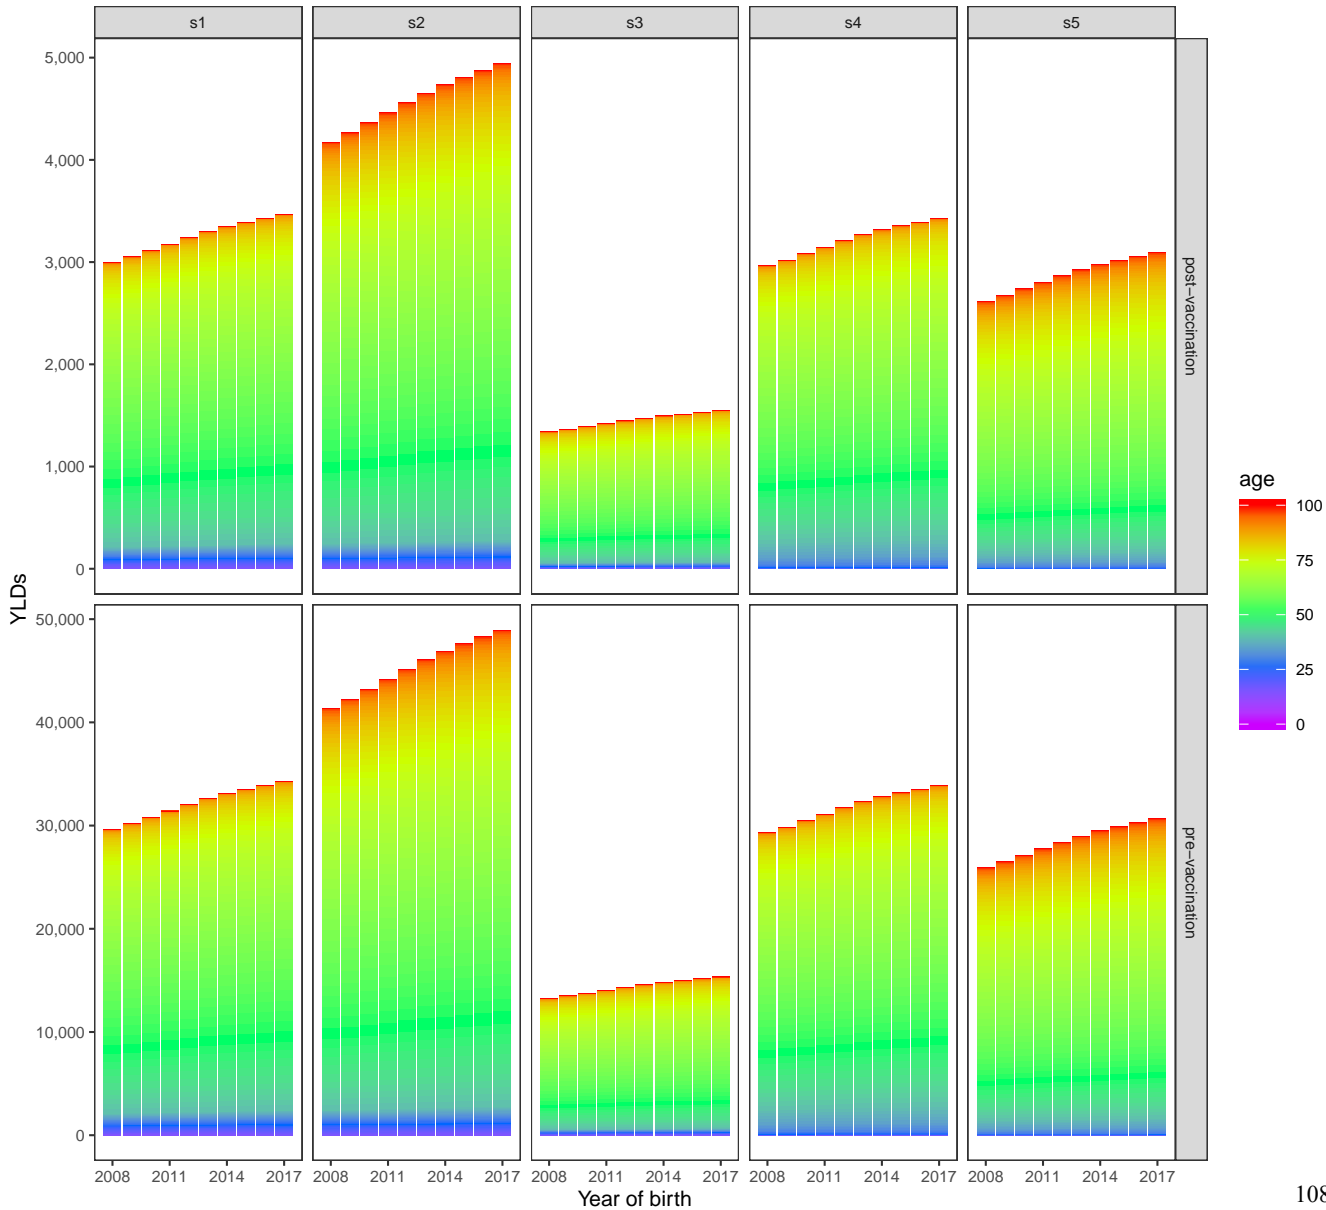

Eastern Mediterranean Region  
 Lifetime burden of cervical cancer YLLs  
 caused by HPV 16/18/31/33/45/52/58 pre- and post-vaccination  
 (vaccination age = 12 years / nonavalent vaccine)

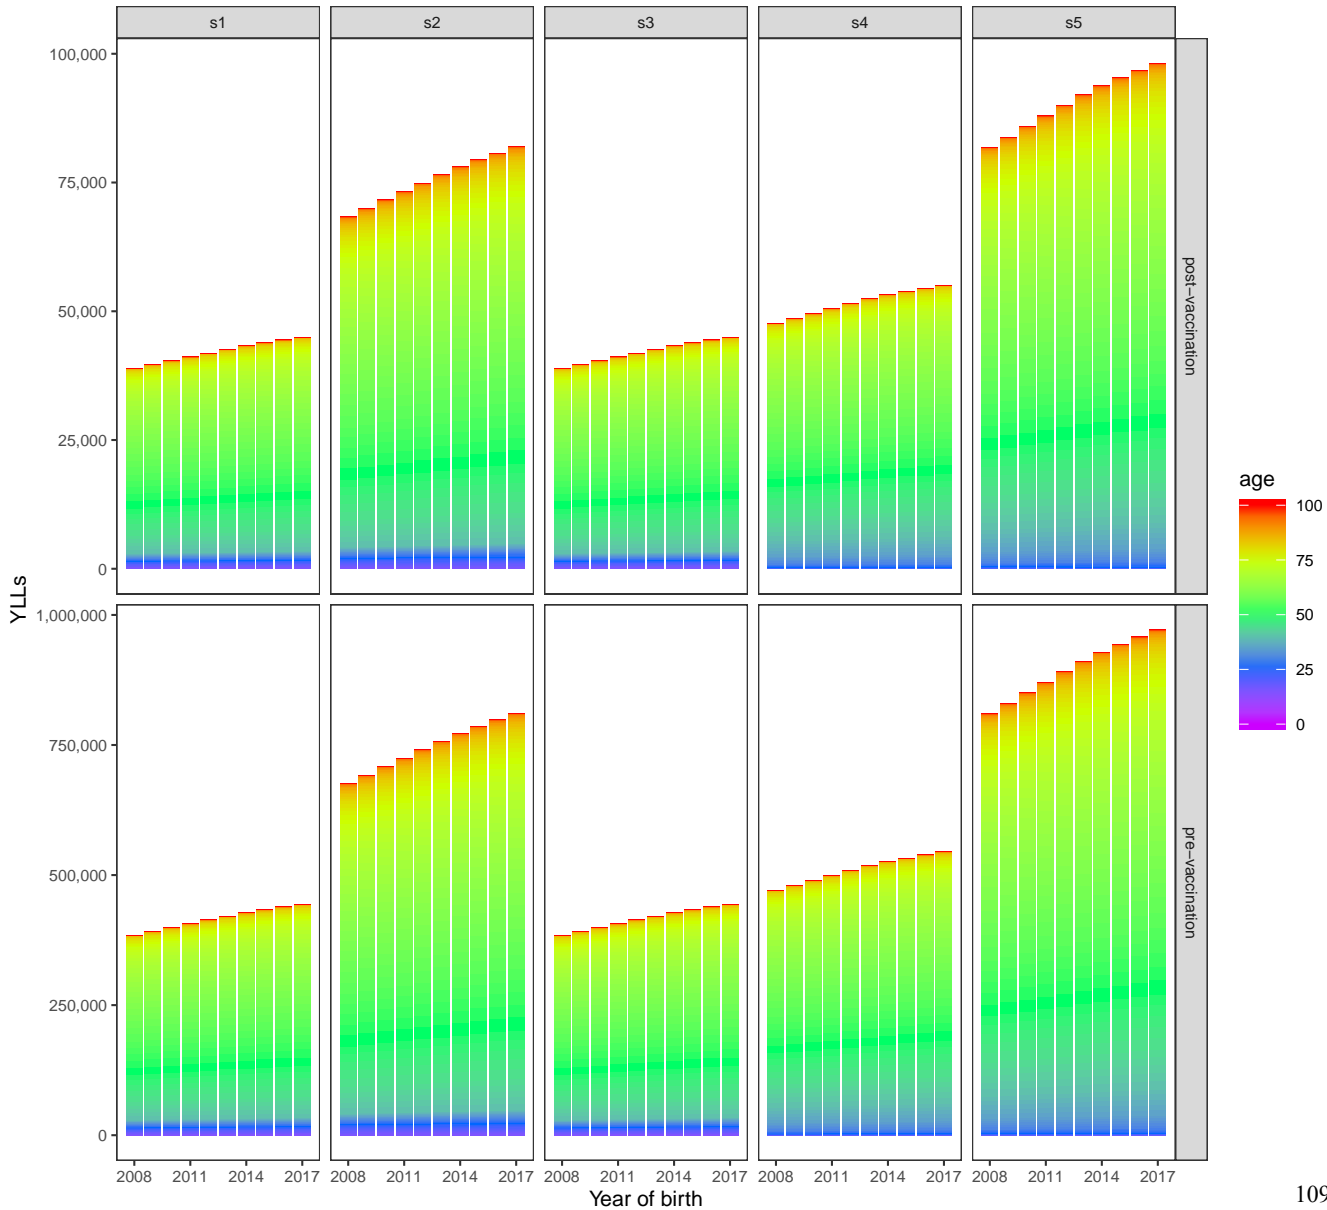

Eastern Mediterranean Region  
 Lifetime burden of cervical cancer DALYs  
 caused by HPV 16/18/31/33/45/52/58 pre- and post-vaccination  
 (vaccination age = 12 years / nonavalent vaccine)

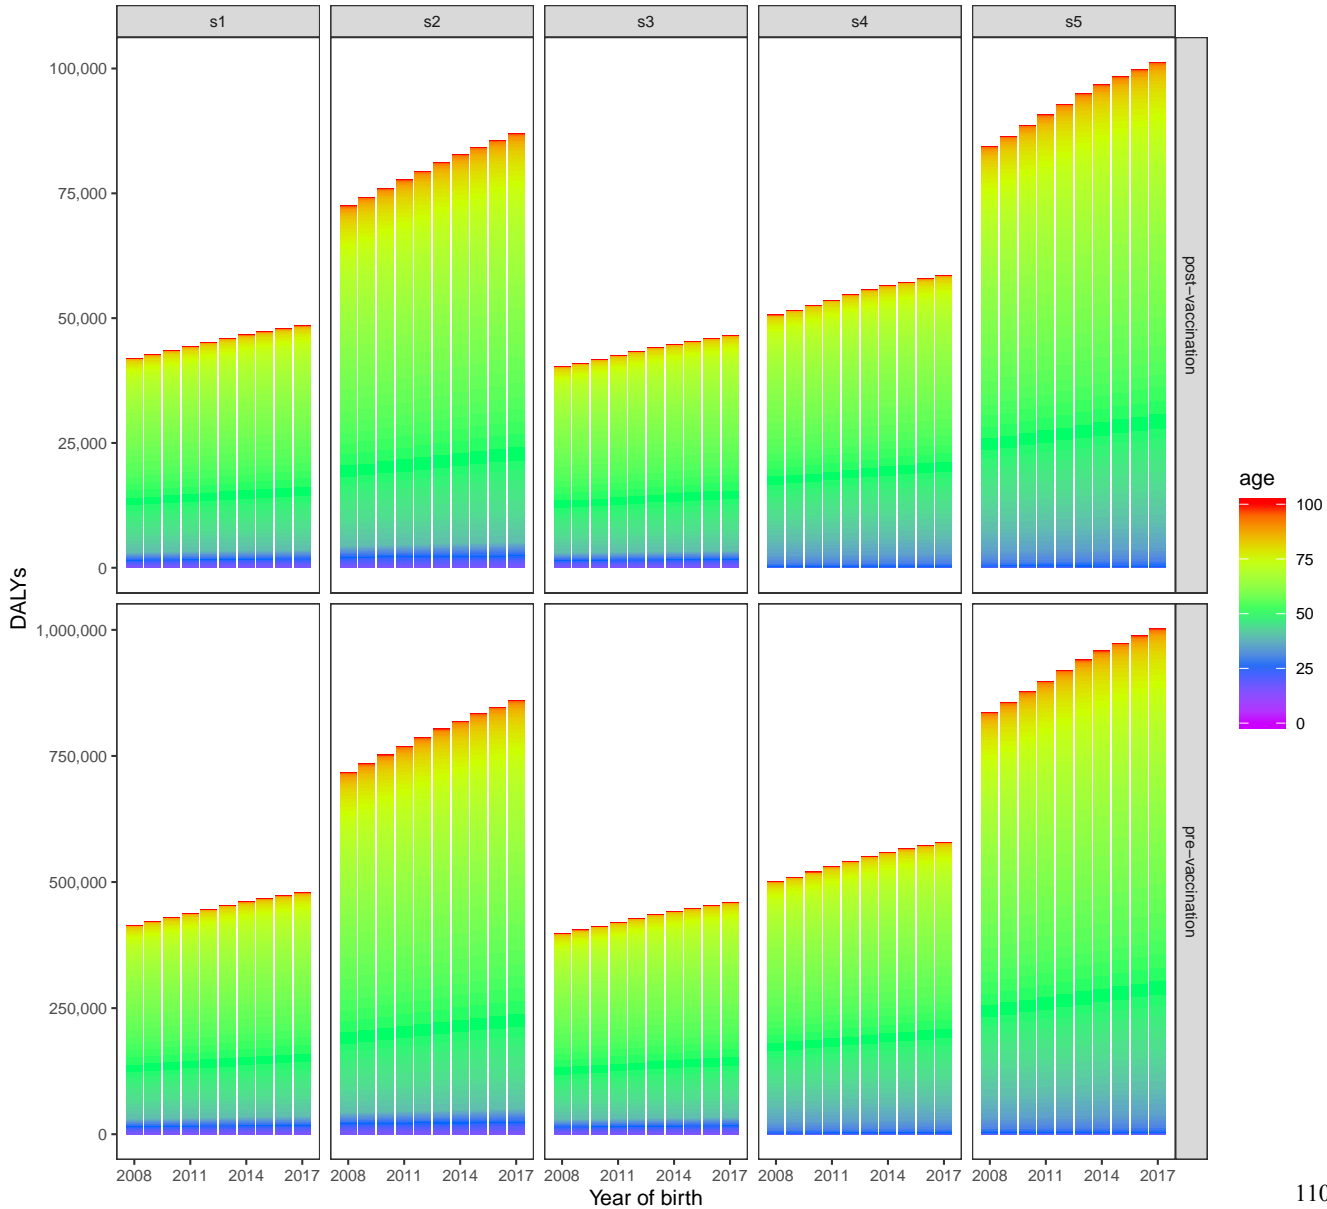

African Region  
 Lifetime burden of cervical cancer Cases  
 caused by HPV 16/18/31/33/45/52/58 pre- and post-vaccination  
 (vaccination age = 12 years / nonavalent vaccine)

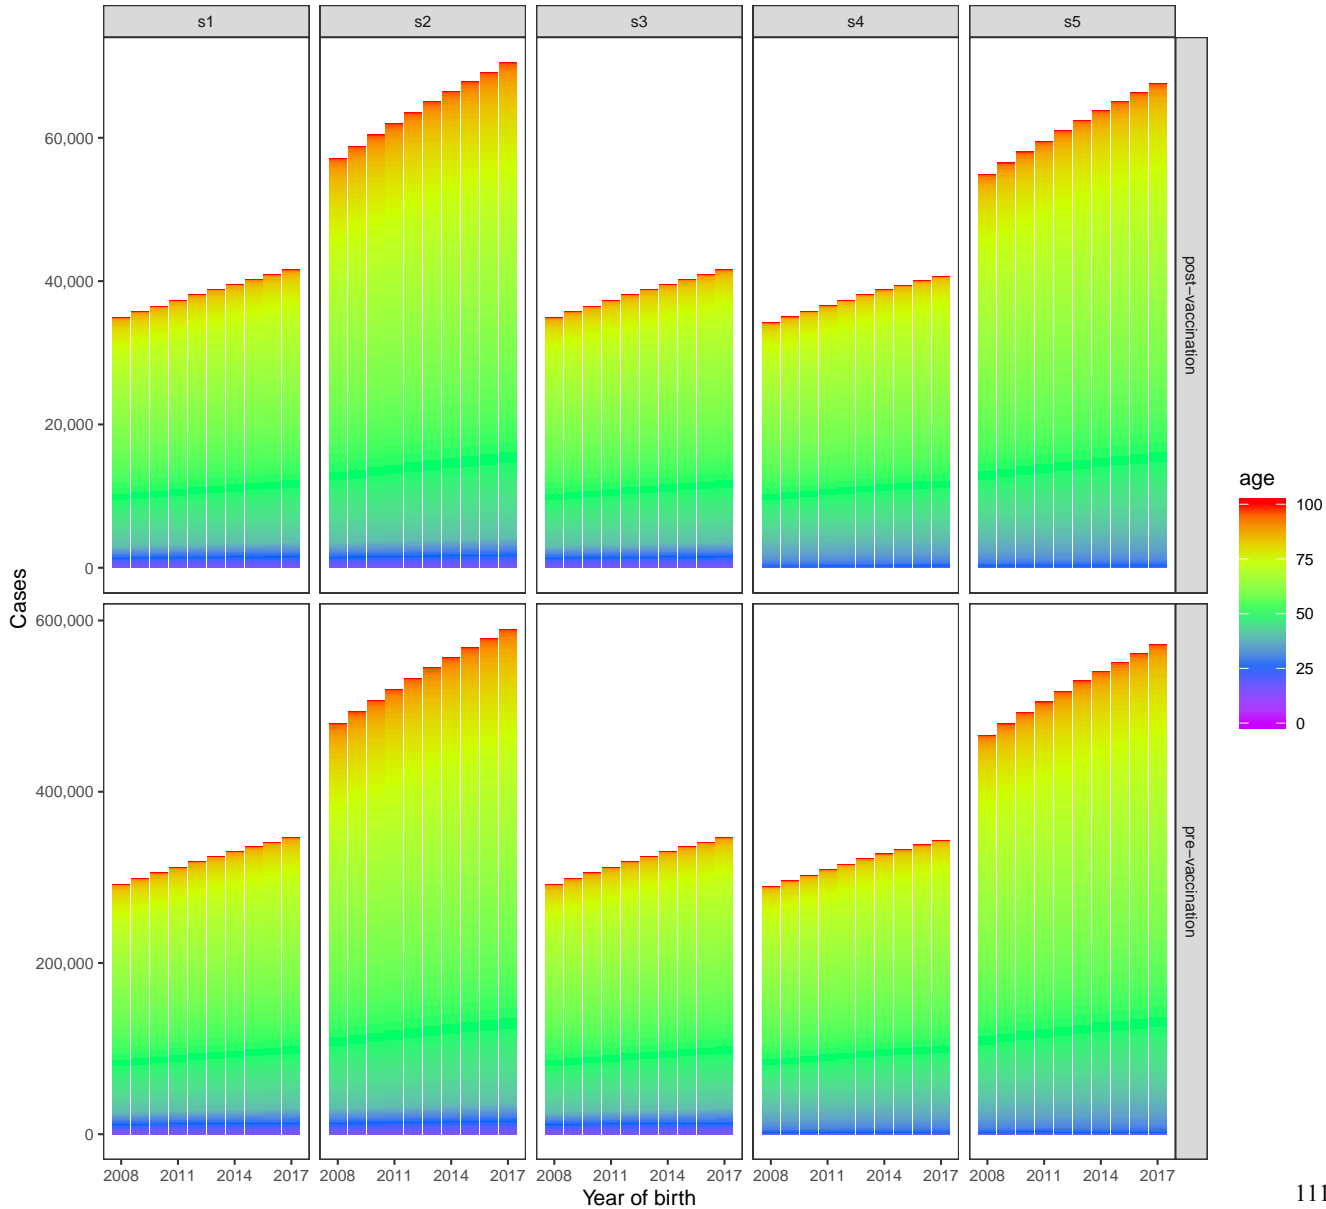

African Region  
 Lifetime burden of cervical cancer Deaths  
 caused by HPV 16/18/31/33/45/52/58 pre- and post-vaccination  
 (vaccination age = 12 years / nonavalent vaccine)

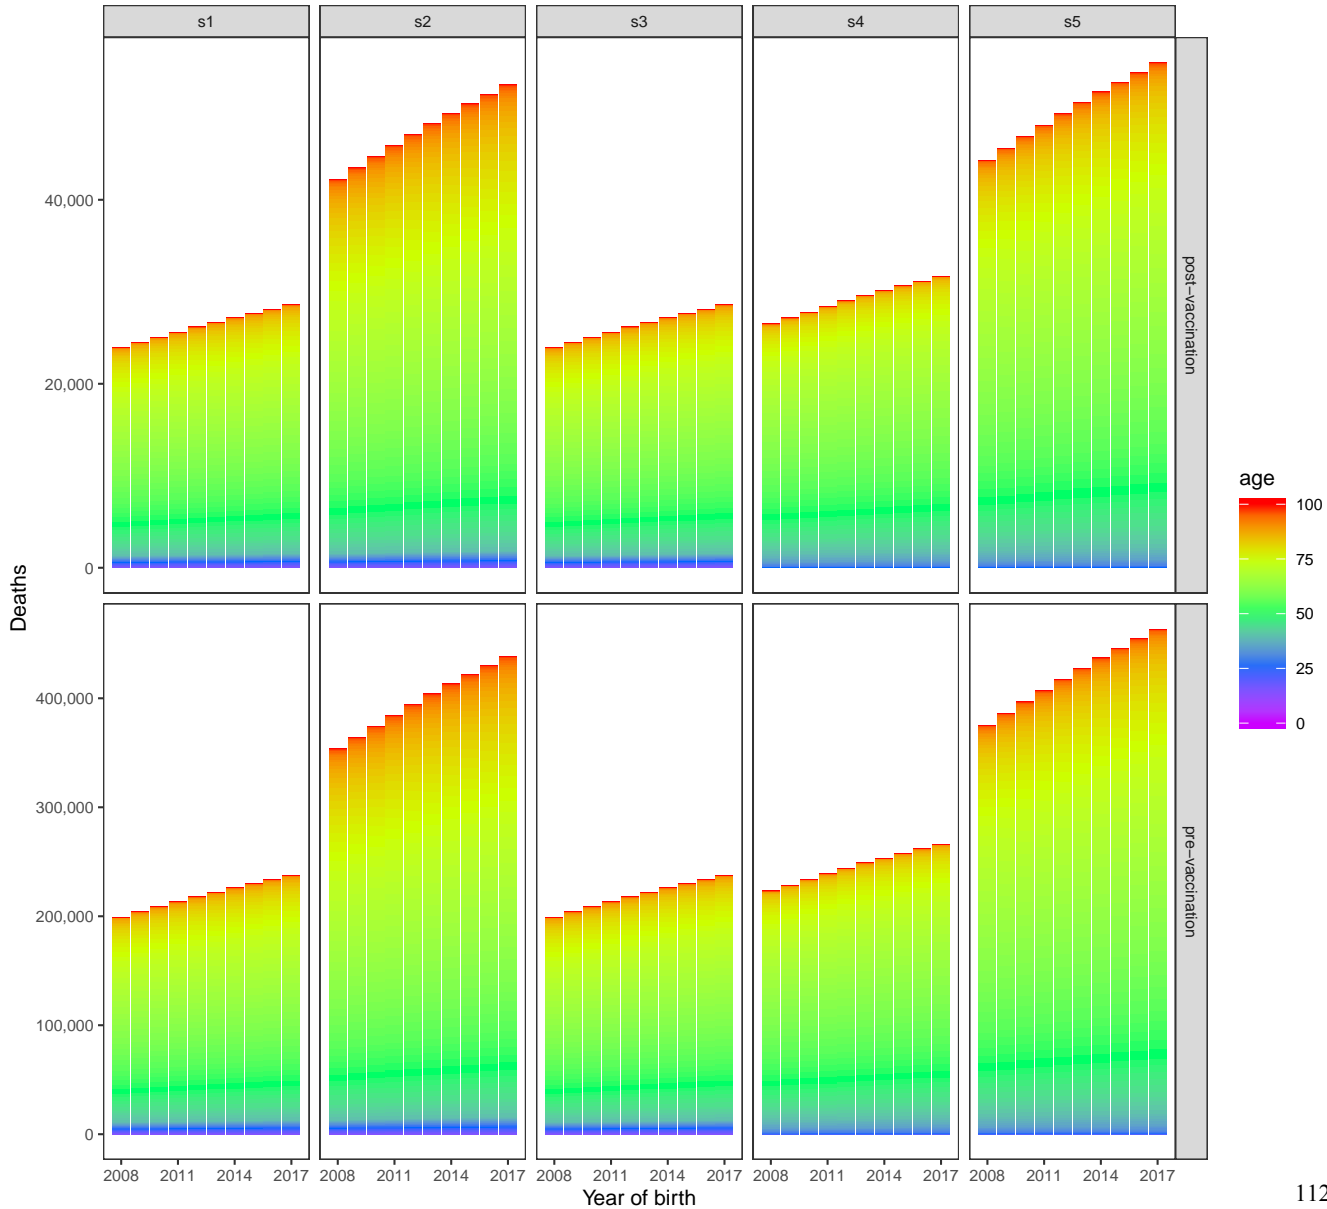

African Region  
 Lifetime burden of cervical cancer YLDs  
 caused by HPV 16/18/31/33/45/52/58 pre- and post-vaccination  
 (vaccination age = 12 years / nonavalent vaccine)

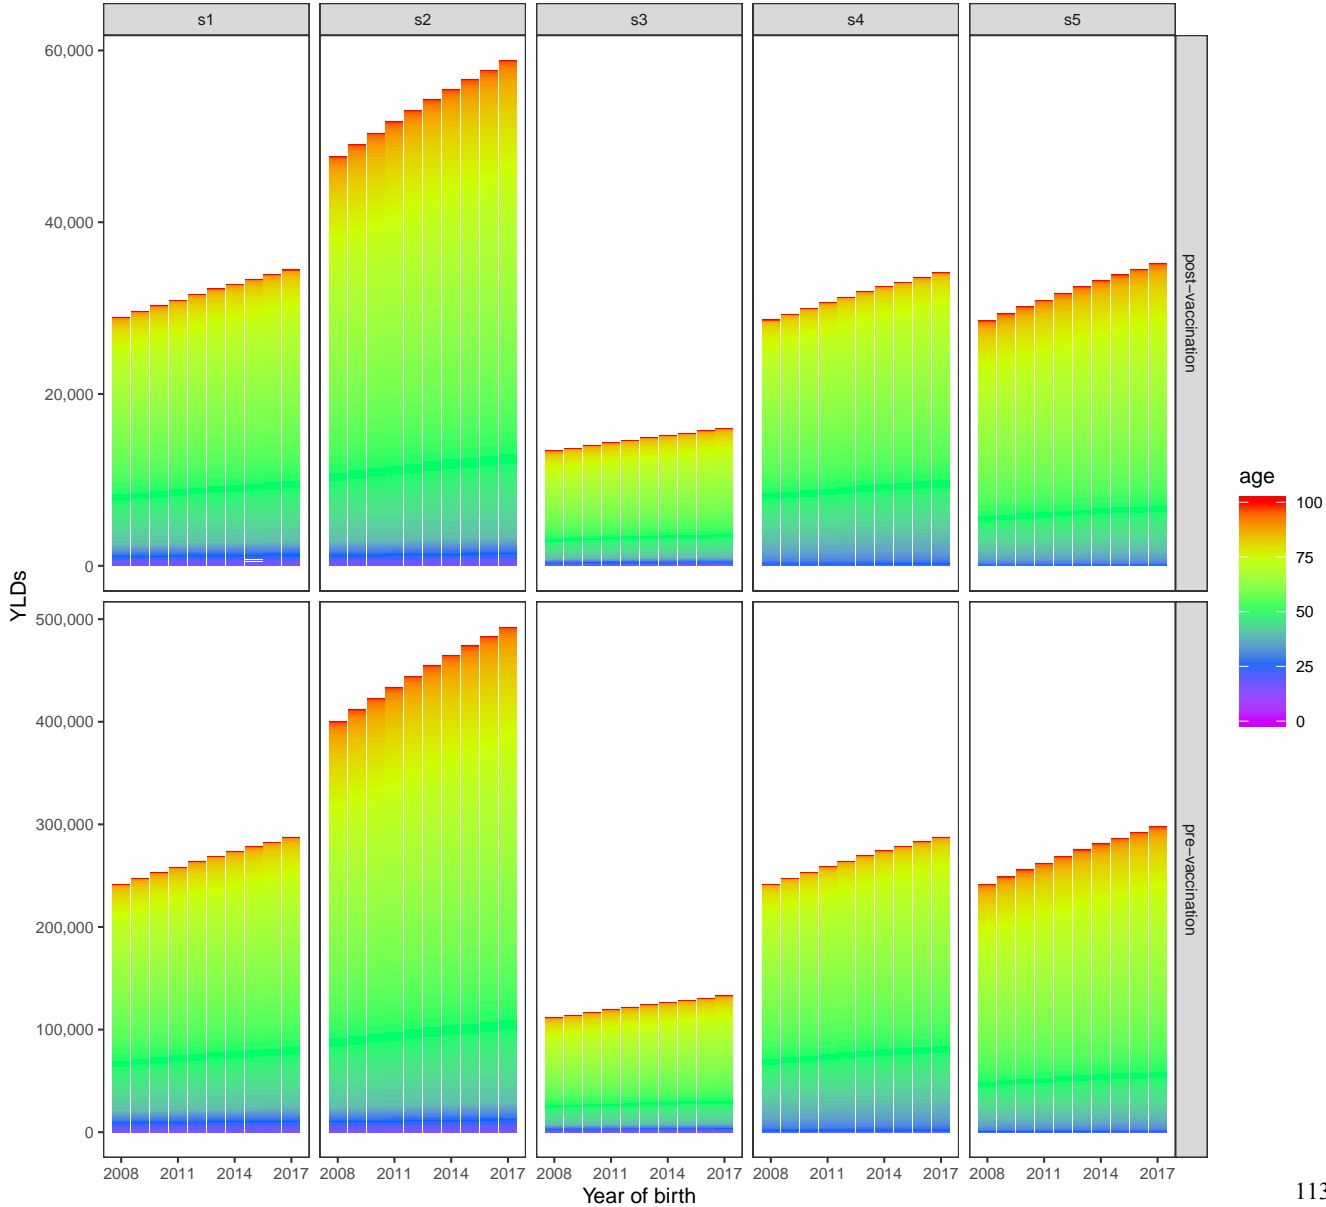



African Region  
 Lifetime burden of cervical cancer YLLs  
 caused by HPV 16/18/31/33/45/52/58 pre- and post-vaccination  
 (vaccination age = 12 years / nonavalent vaccine)

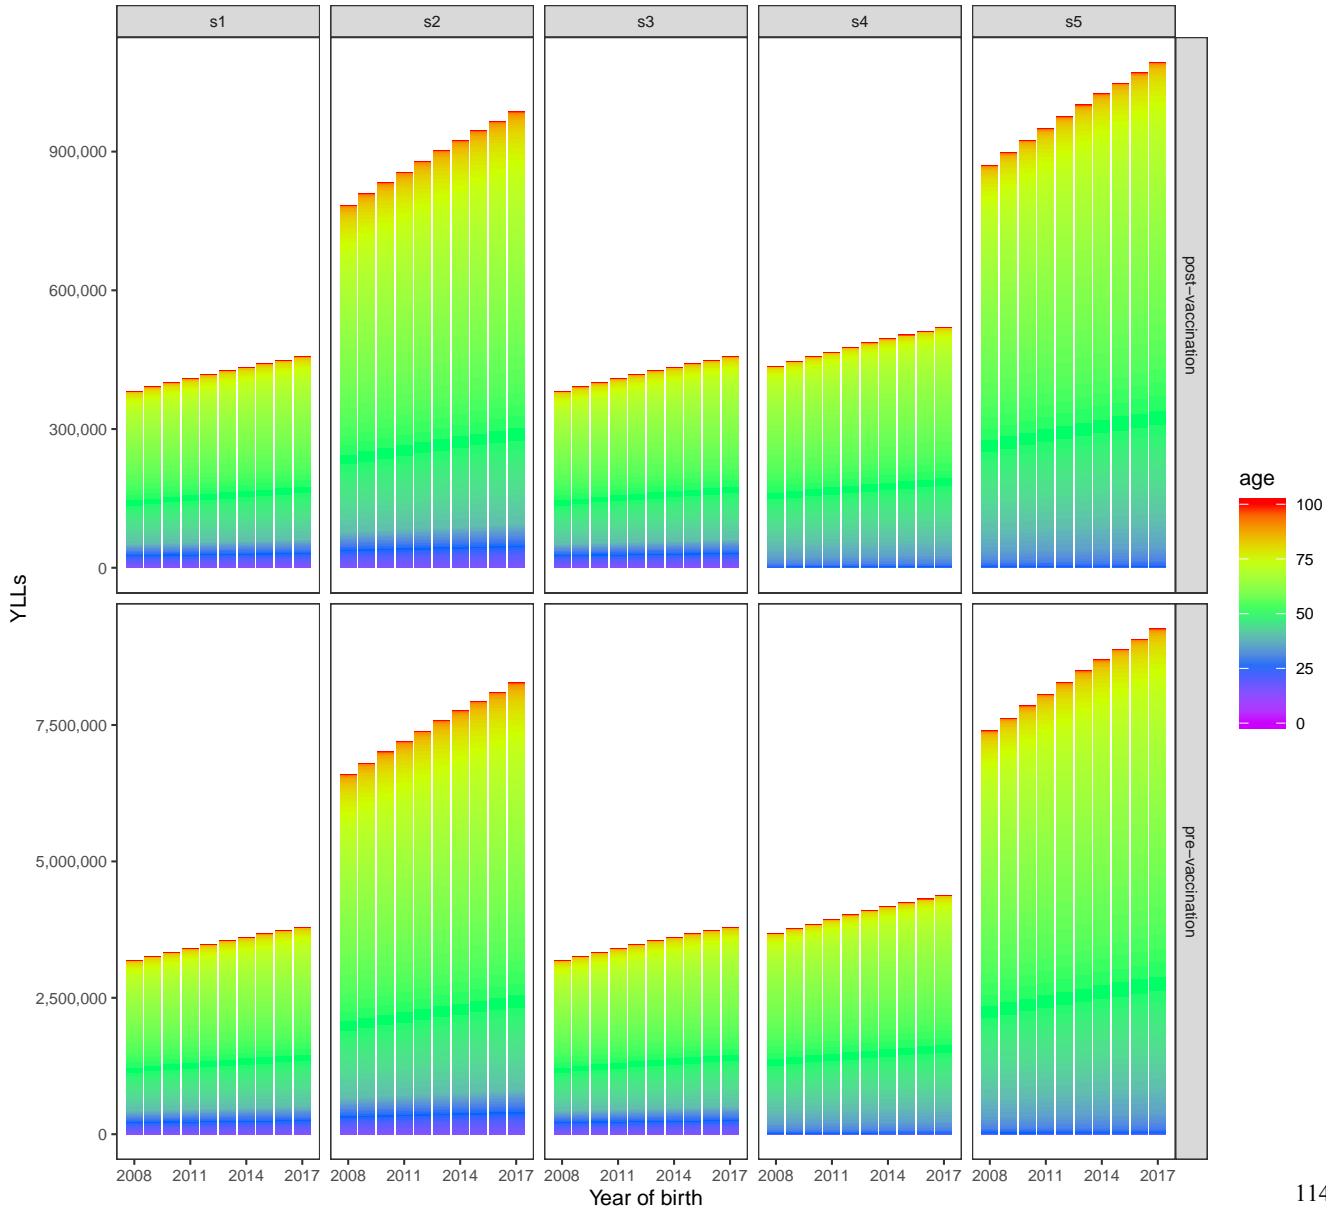

African Region  
 Lifetime burden of cervical cancer DALYs  
 caused by HPV 16/18/31/33/45/52/58 pre- and post-vaccination  
 (vaccination age = 12 years / nonavalent vaccine)

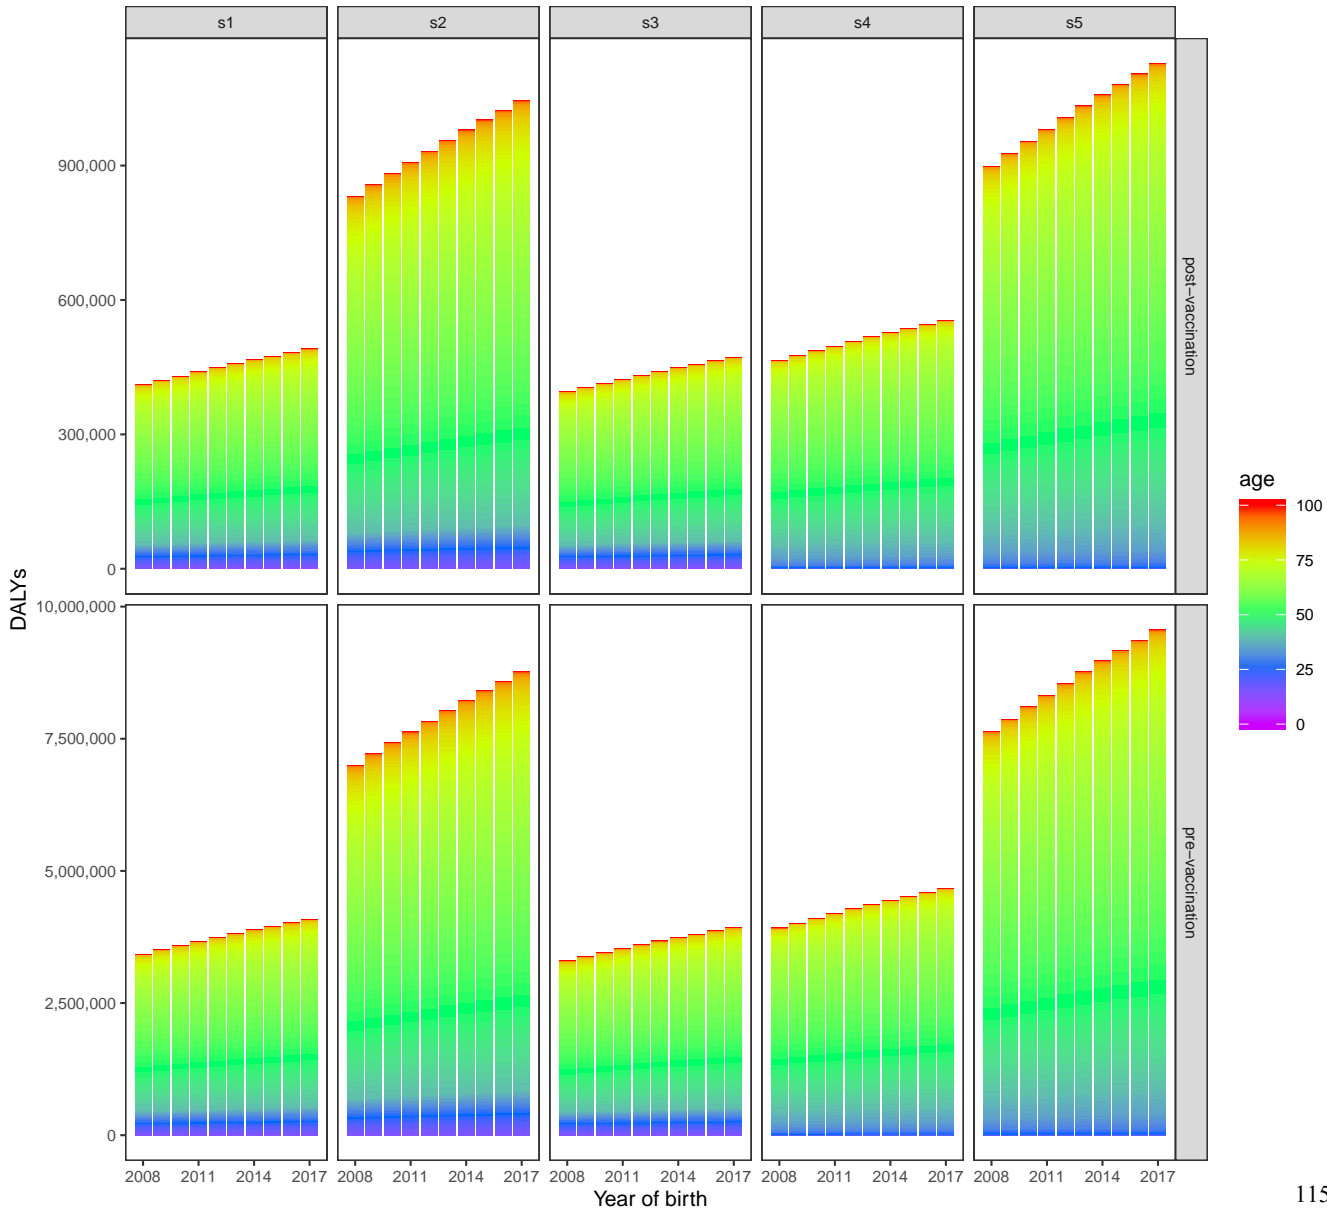

European Region  
 Lifetime burden of cervical cancer Cases  
 caused by HPV 16/18/31/33/45/52/58 pre- and post-vaccination  
 (vaccination age = 12 years / nonavalent vaccine)

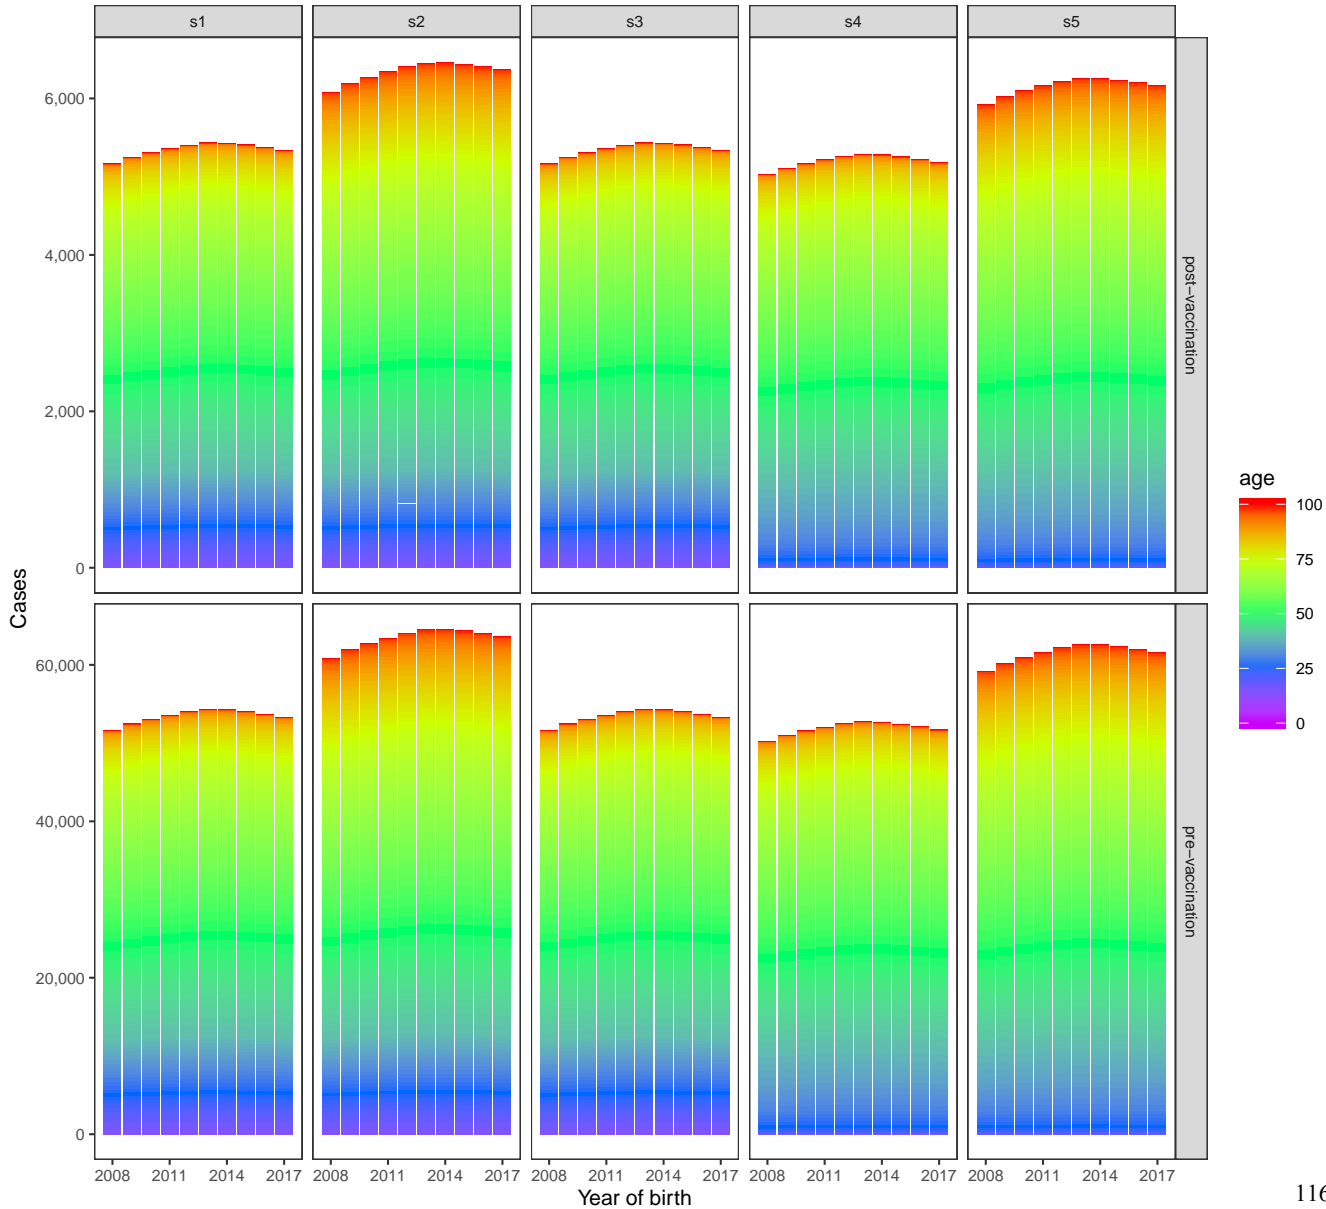

European Region  
 Lifetime burden of cervical cancer Deaths  
 caused by HPV 16/18/31/33/45/52/58 pre- and post-vaccination  
 (vaccination age = 12 years / nonavalent vaccine)

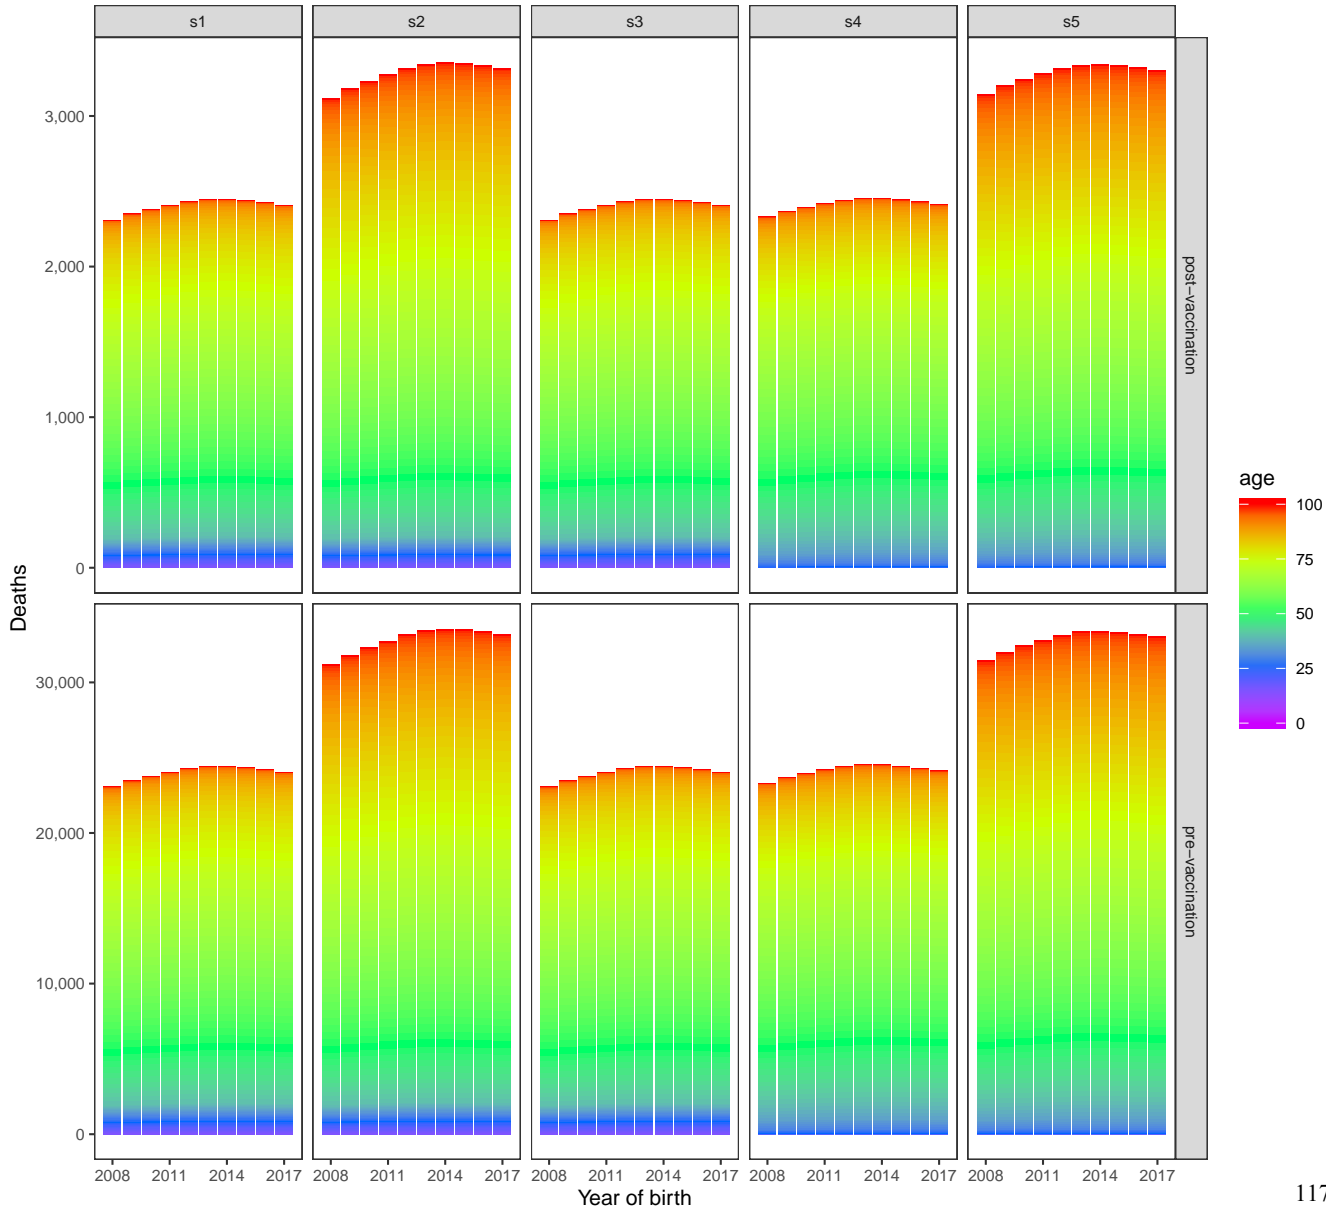

European Region  
 Lifetime burden of cervical cancer YLDs  
 caused by HPV 16/18/31/33/45/52/58 pre- and post-vaccination  
 (vaccination age = 12 years / nonavalent vaccine)

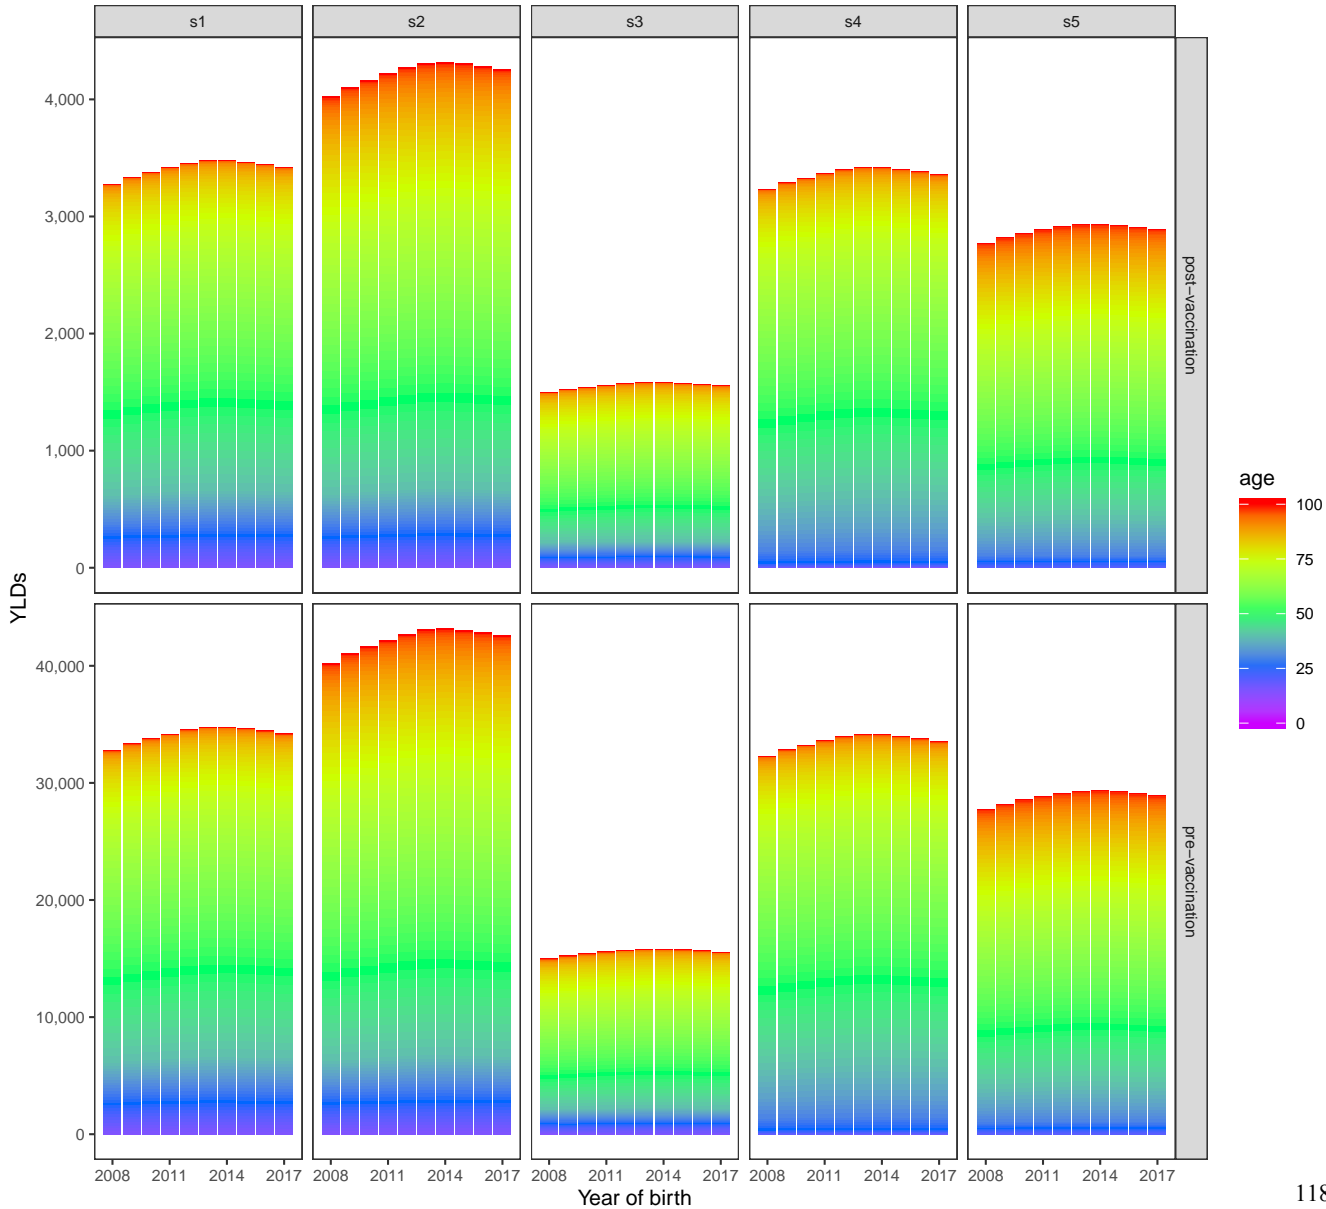

European Region  
 Lifetime burden of cervical cancer YLLs  
 caused by HPV 16/18/31/33/45/52/58 pre- and post-vaccination  
 (vaccination age = 12 years / nonavalent vaccine)

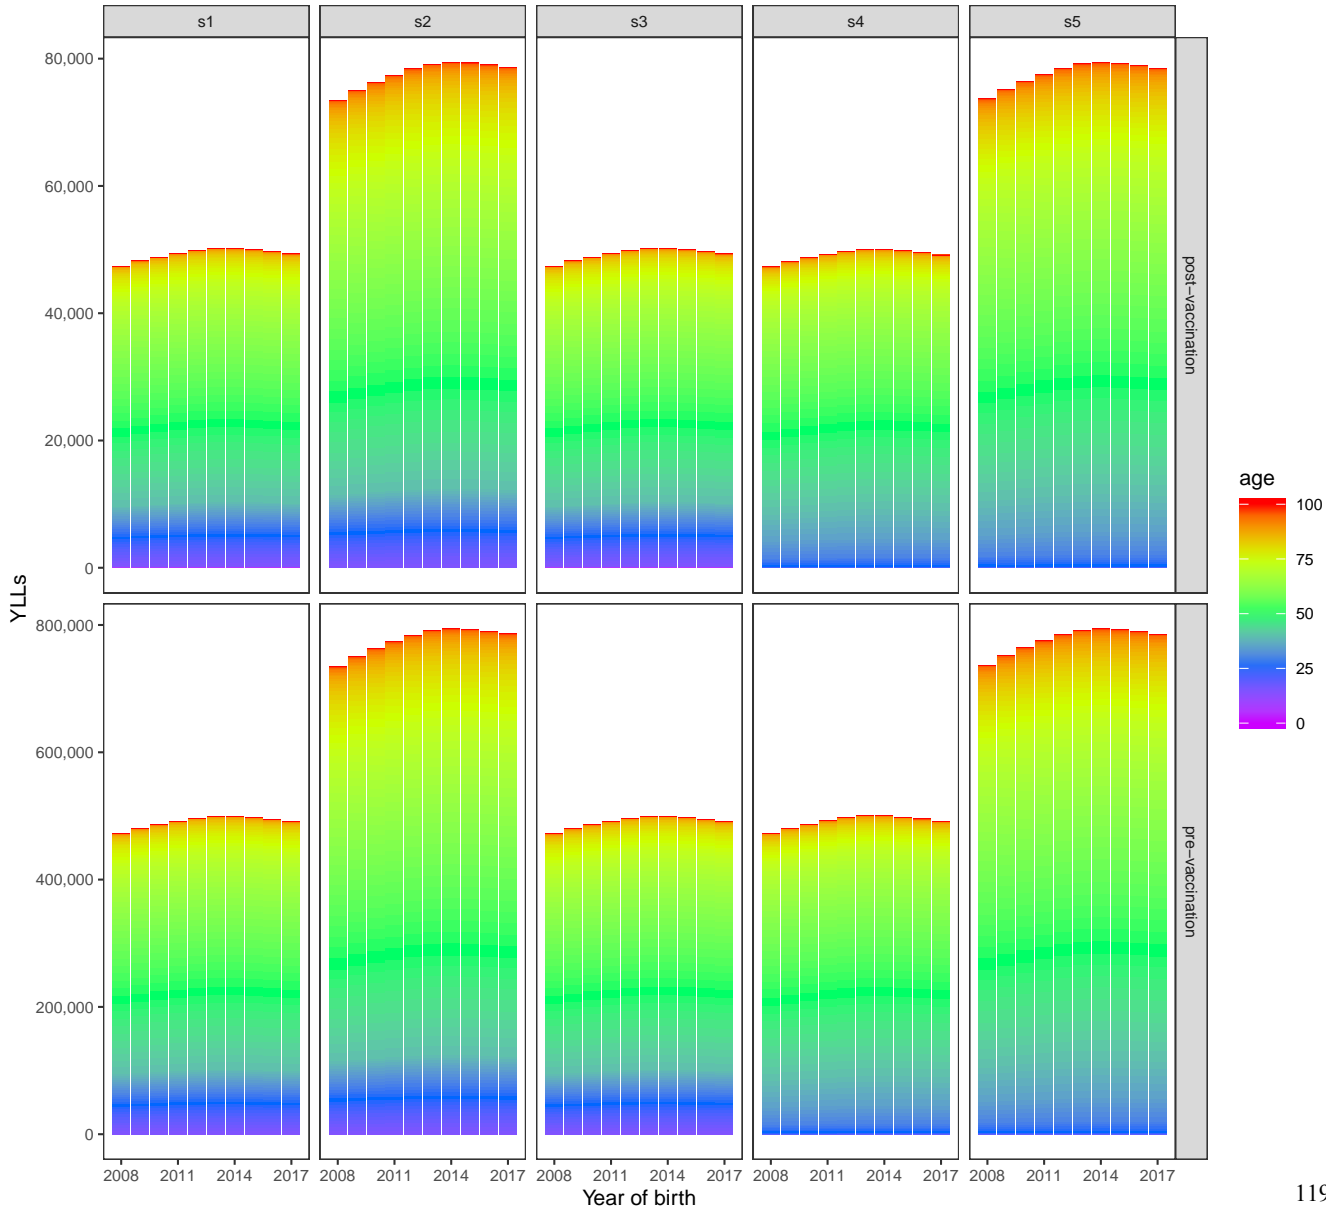

European Region  
 Lifetime burden of cervical cancer DALYs  
 caused by HPV 16/18/31/33/45/52/58 pre- and post-vaccination  
 (vaccination age = 12 years / nonavalent vaccine)

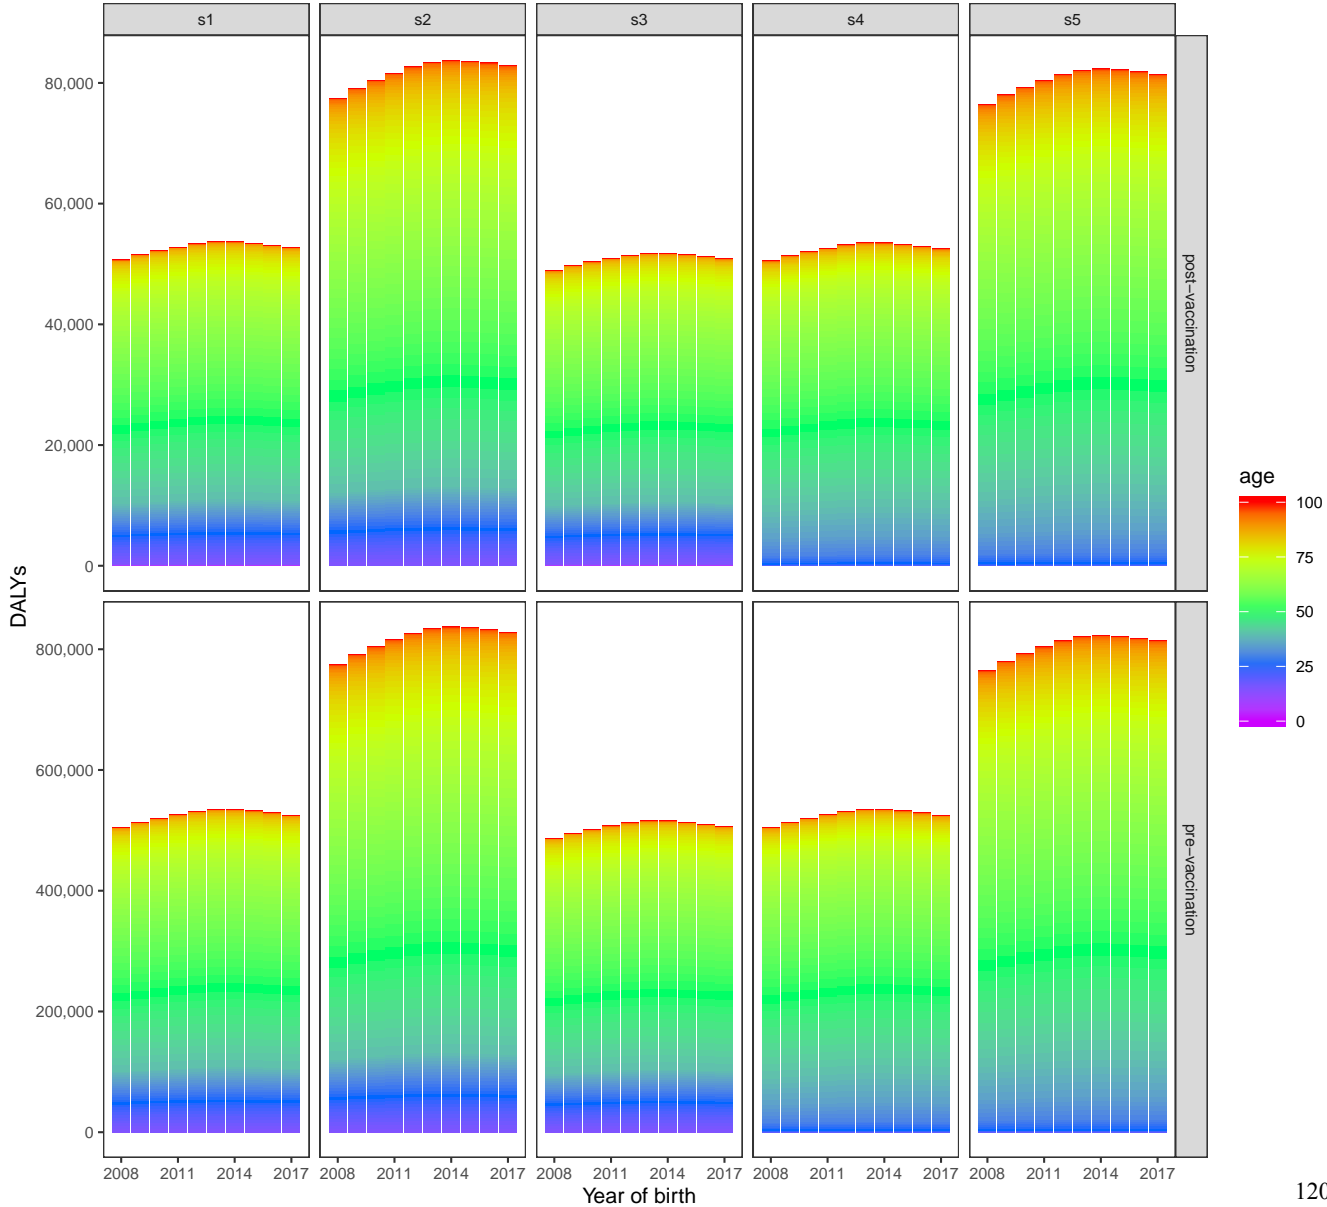

Region of the Americas  
 Lifetime burden of cervical cancer Cases  
 caused by HPV 16/18/31/33/45/52/58 pre- and post-vaccination  
 (vaccination age = 12 years / nonavalent vaccine)

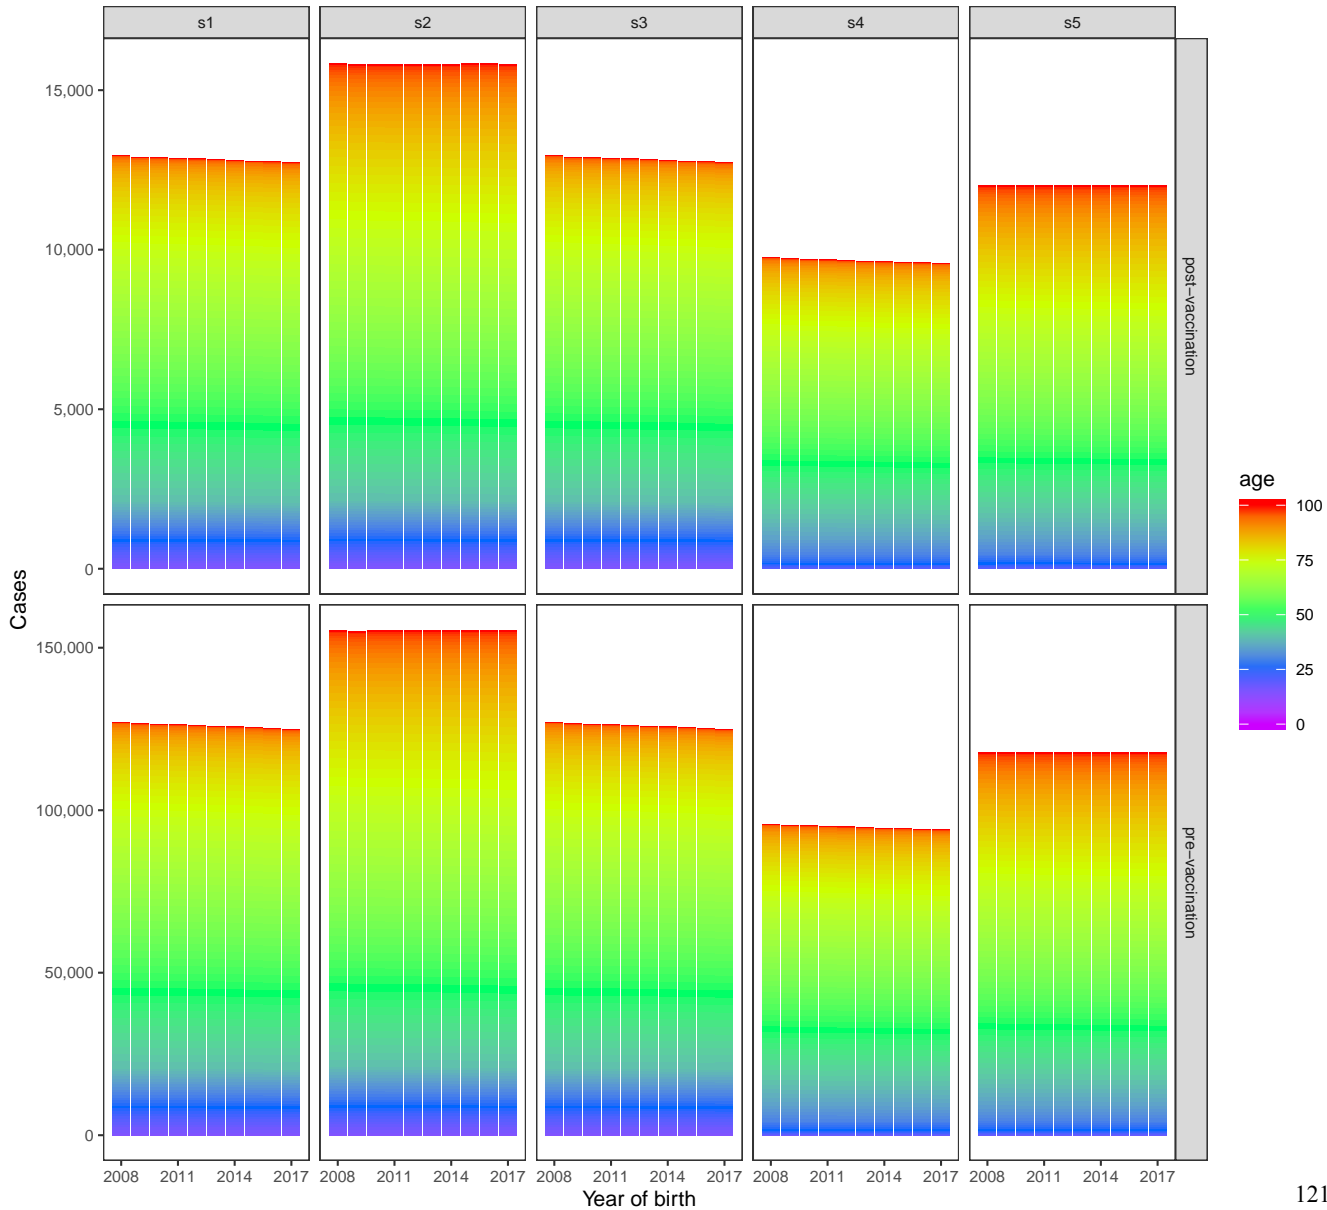



Region of the Americas  
 Lifetime burden of cervical cancer Deaths  
 caused by HPV 16/18/31/33/45/52/58 pre- and post-vaccination  
 (vaccination age = 12 years / nonavalent vaccine)

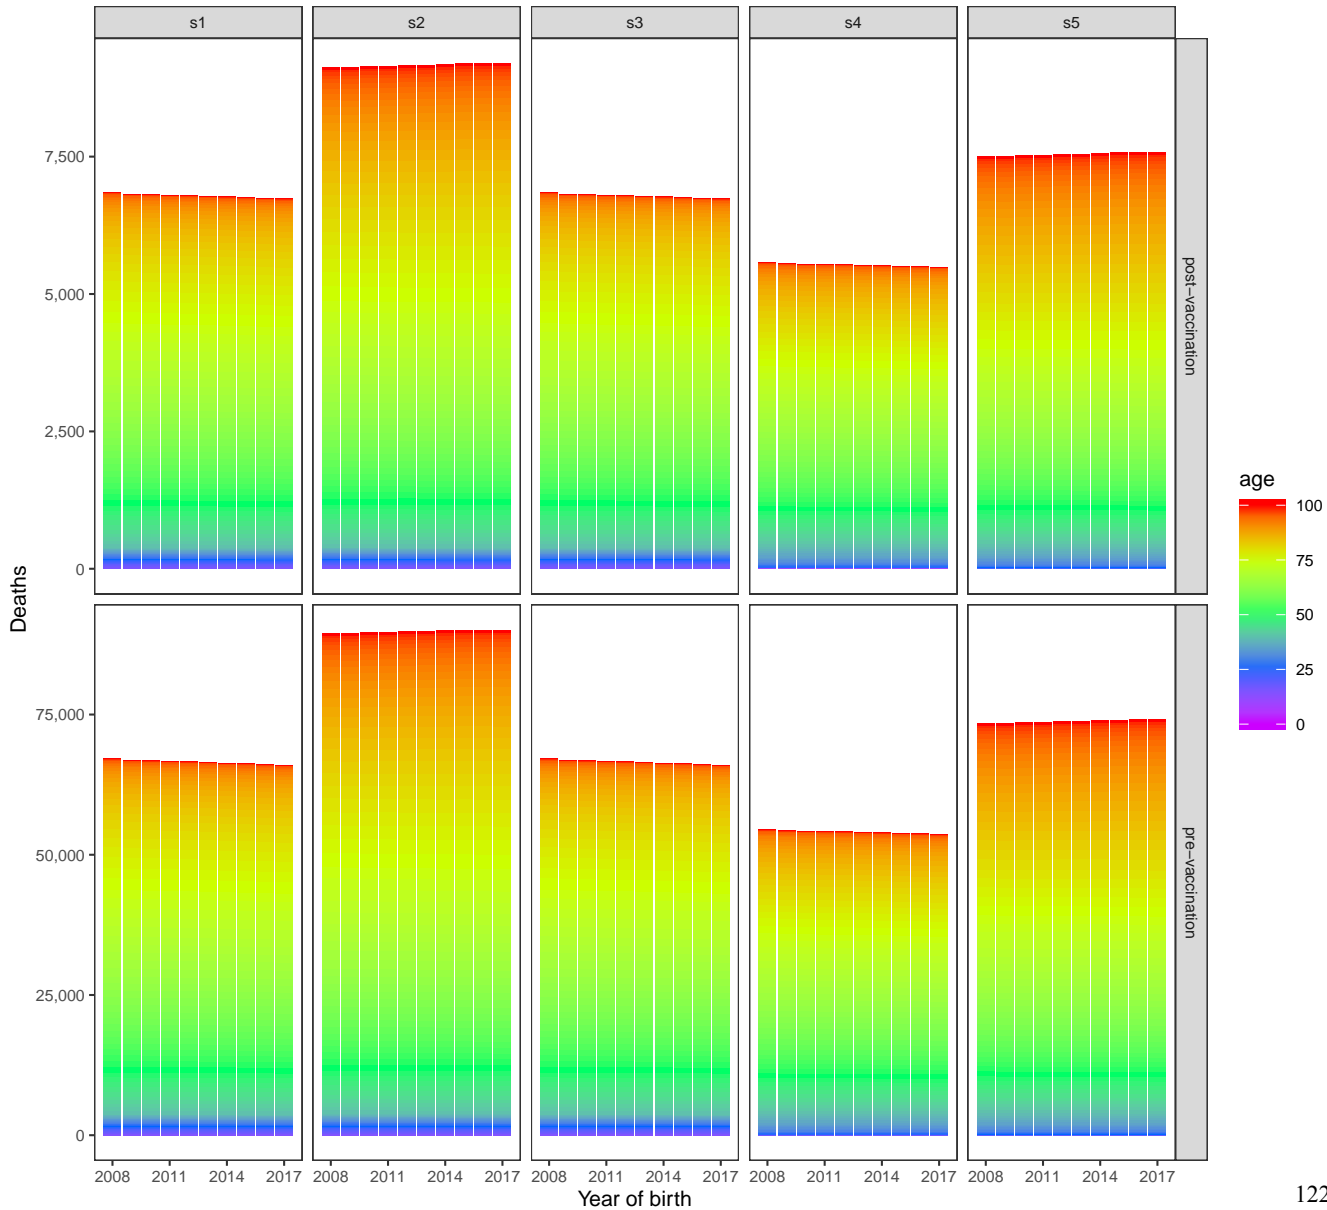

Region of the Americas  
 Lifetime burden of cervical cancer YLDs  
 caused by HPV 16/18/31/33/45/52/58 pre- and post-vaccination  
 (vaccination age = 12 years / nonavalent vaccine)

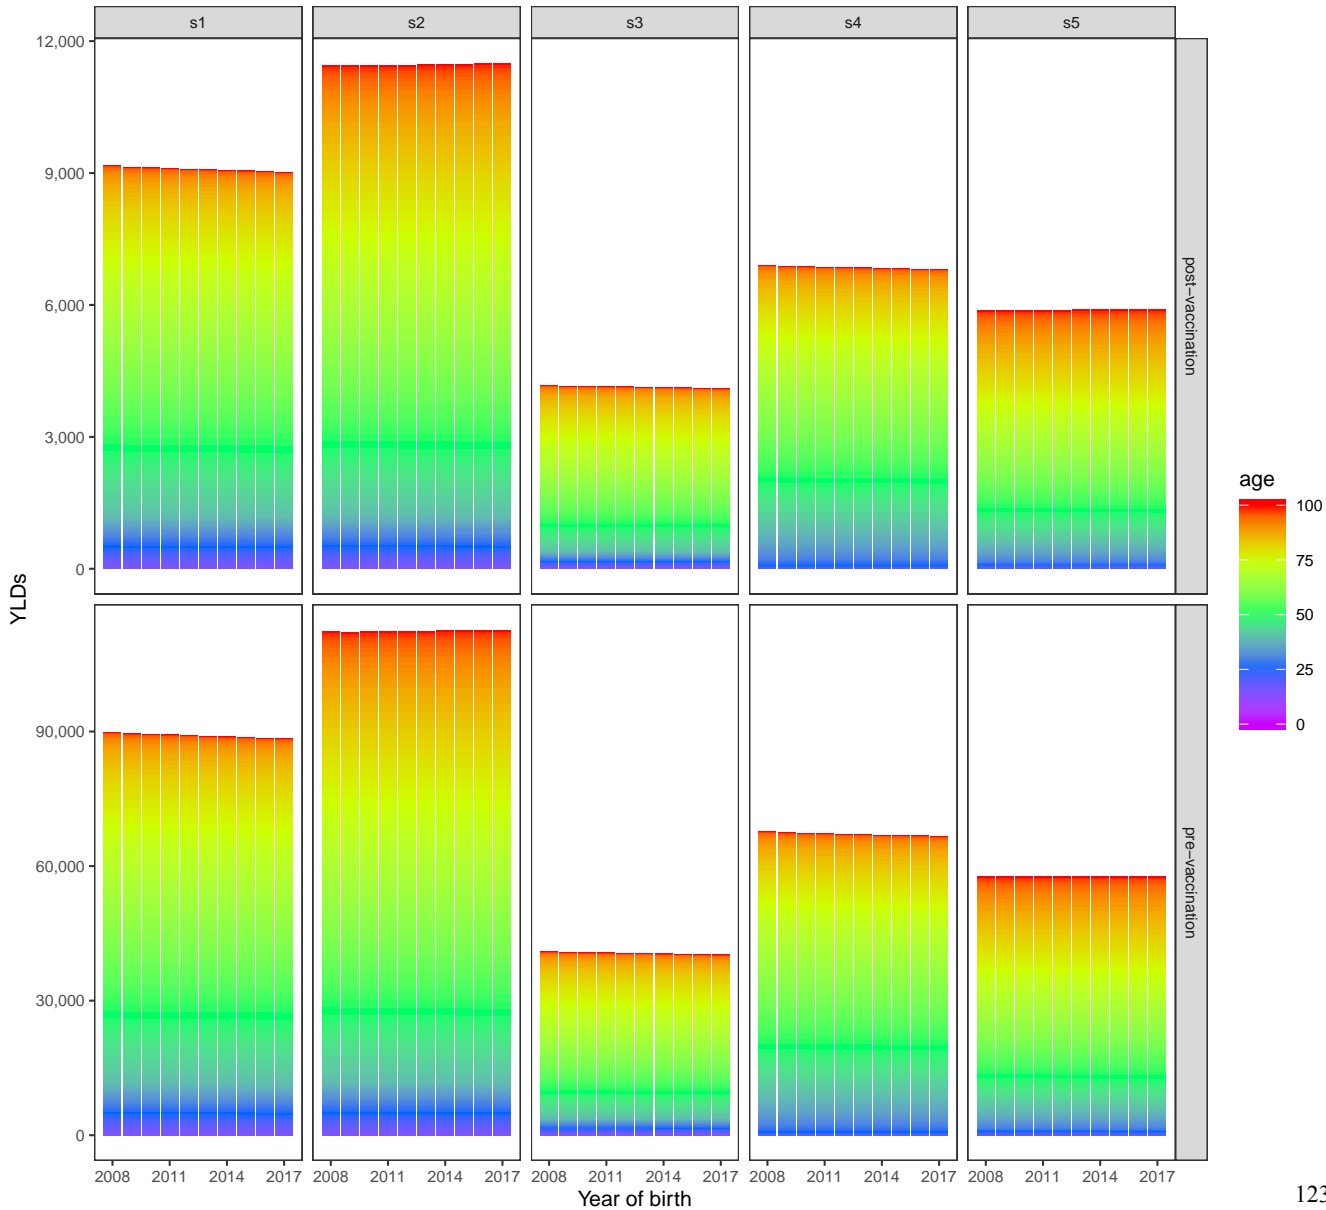

Region of the Americas  
 Lifetime burden of cervical cancer YLLs  
 caused by HPV 16/18/31/33/45/52/58 pre- and post-vaccination  
 (vaccination age = 12 years / nonavalent vaccine)

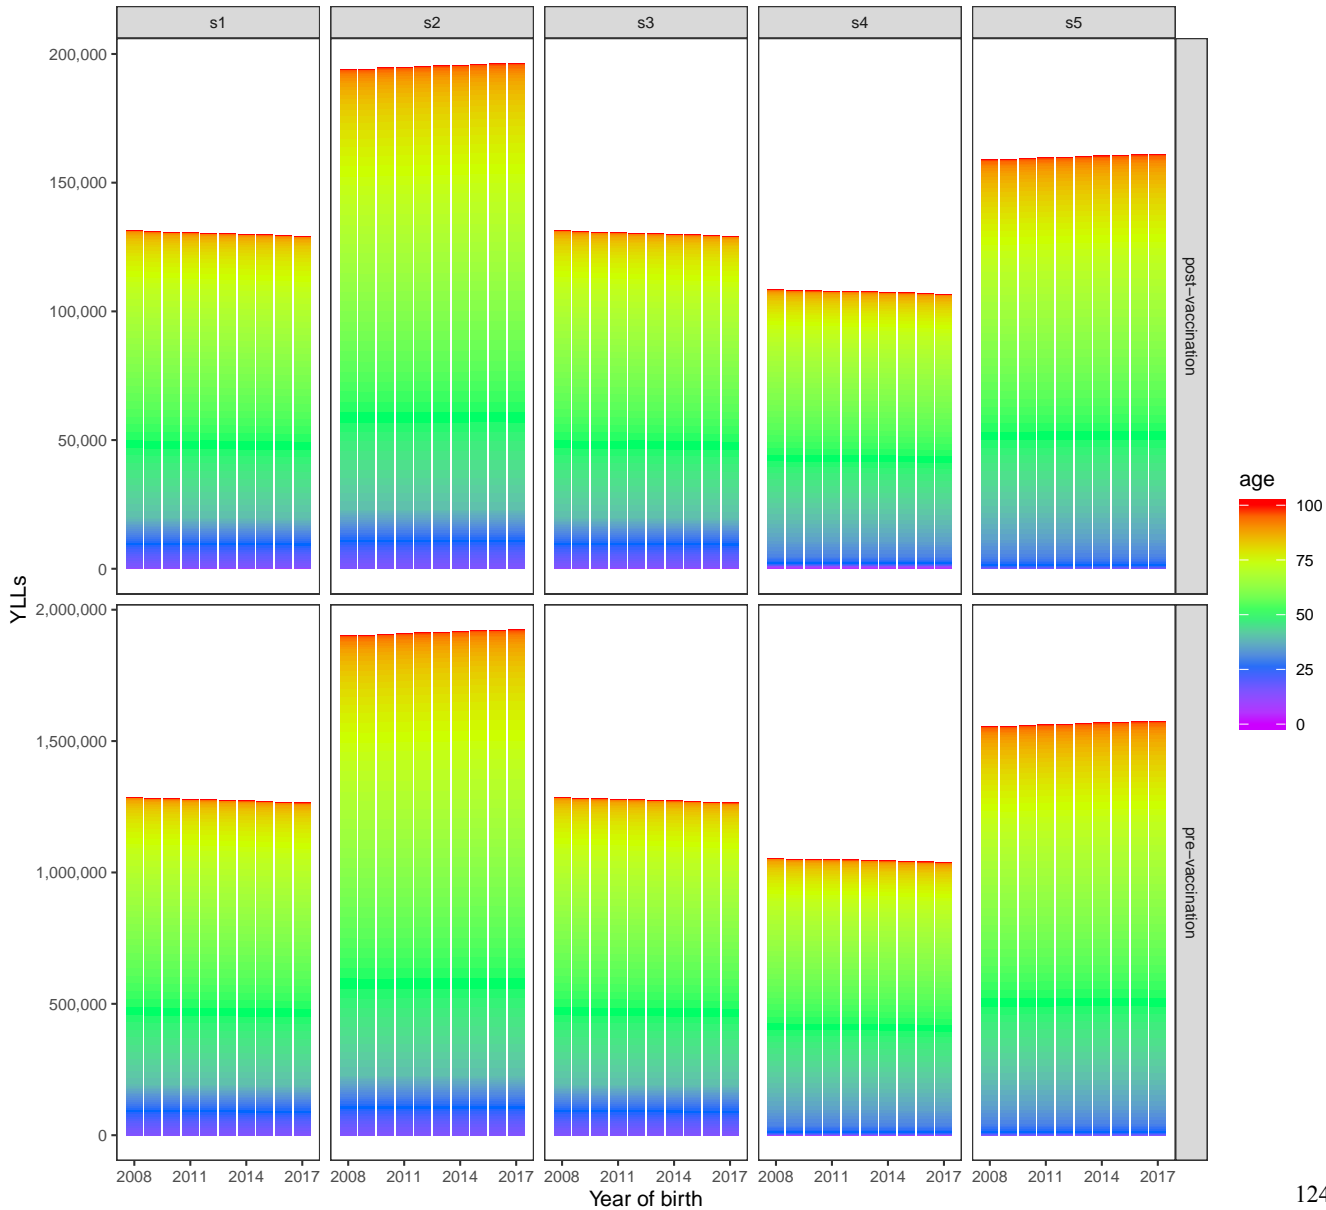

Region of the Americas  
 Lifetime burden of cervical cancer DALYs  
 caused by HPV 16/18/31/33/45/52/58 pre- and post-vaccination  
 (vaccination age = 12 years / nonavalent vaccine)

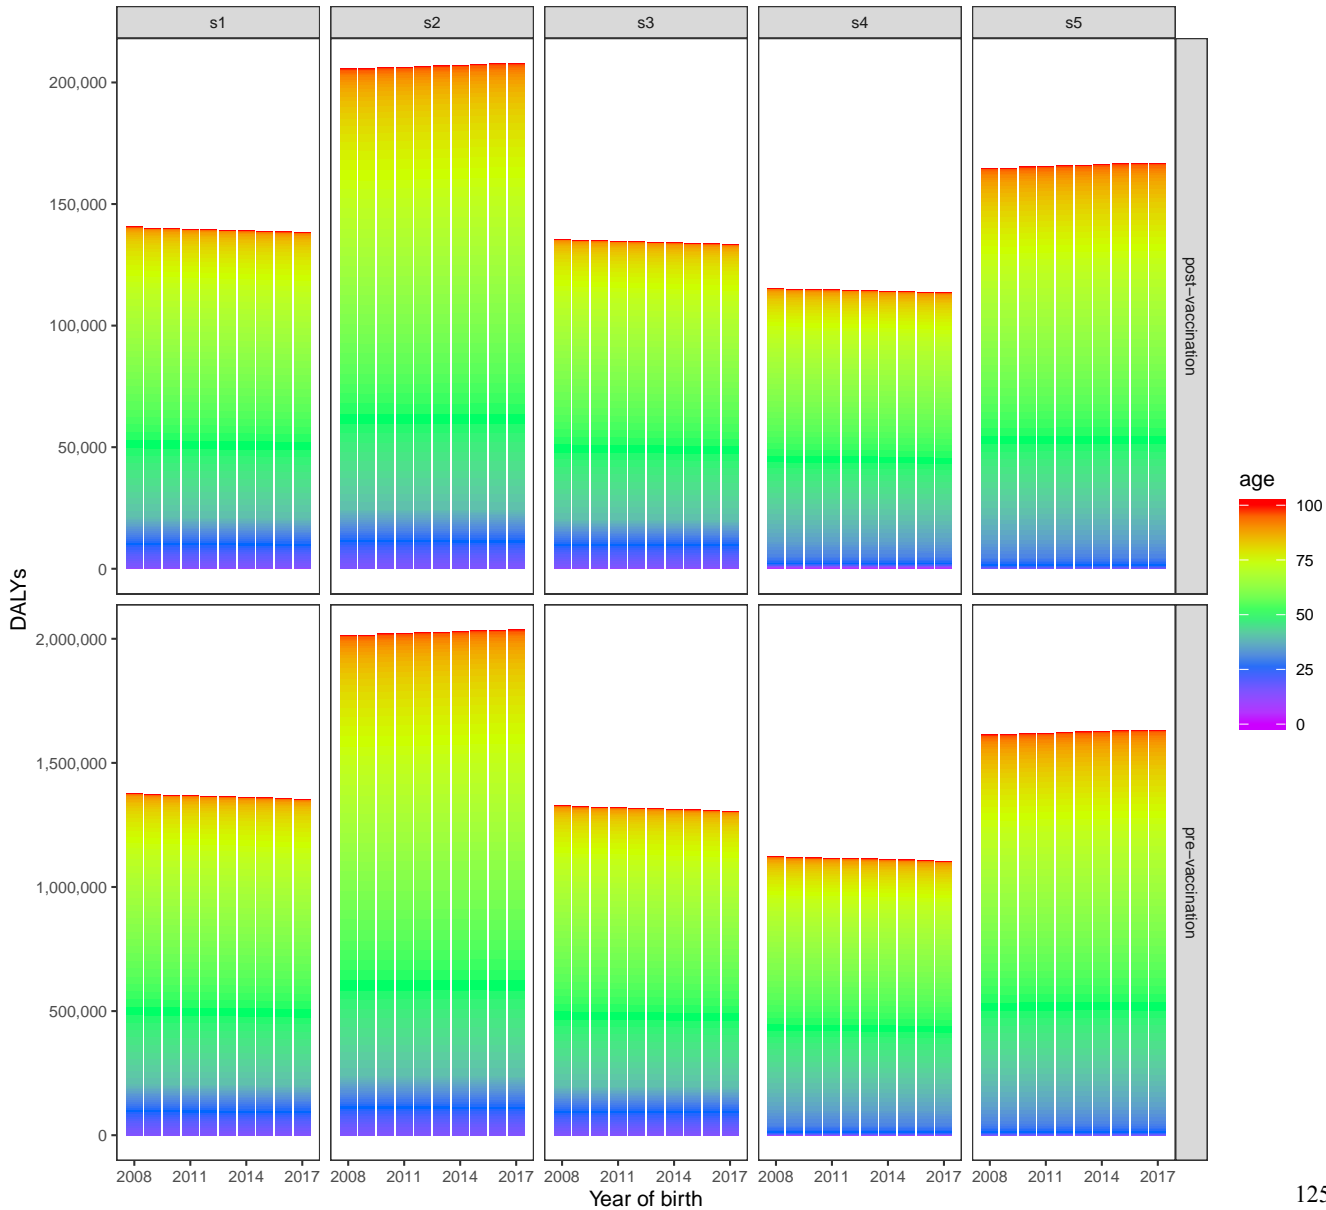

Western Pacific Region  
 Lifetime burden of cervical cancer Cases  
 caused by HPV 16/18/31/33/45/52/58 pre- and post-vaccination  
 (vaccination age = 12 years / nonavalent vaccine)

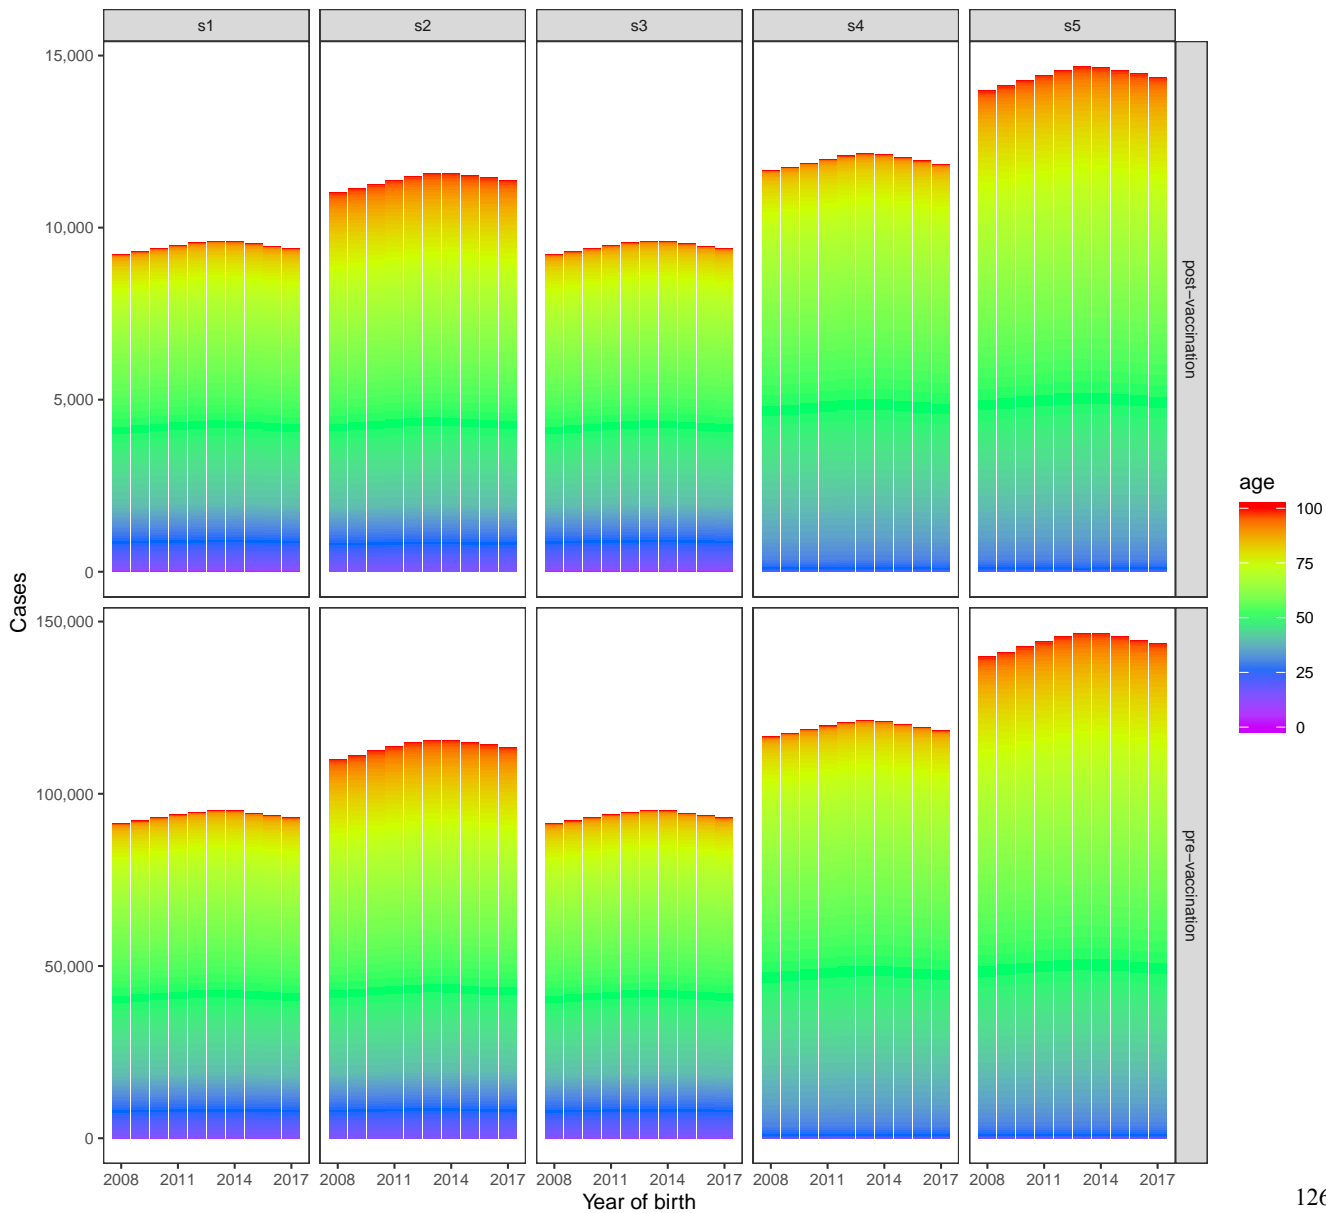

Western Pacific Region  
 Lifetime burden of cervical cancer Deaths  
 caused by HPV 16/18/31/33/45/52/58 pre- and post-vaccination  
 (vaccination age = 12 years / nonavalent vaccine)

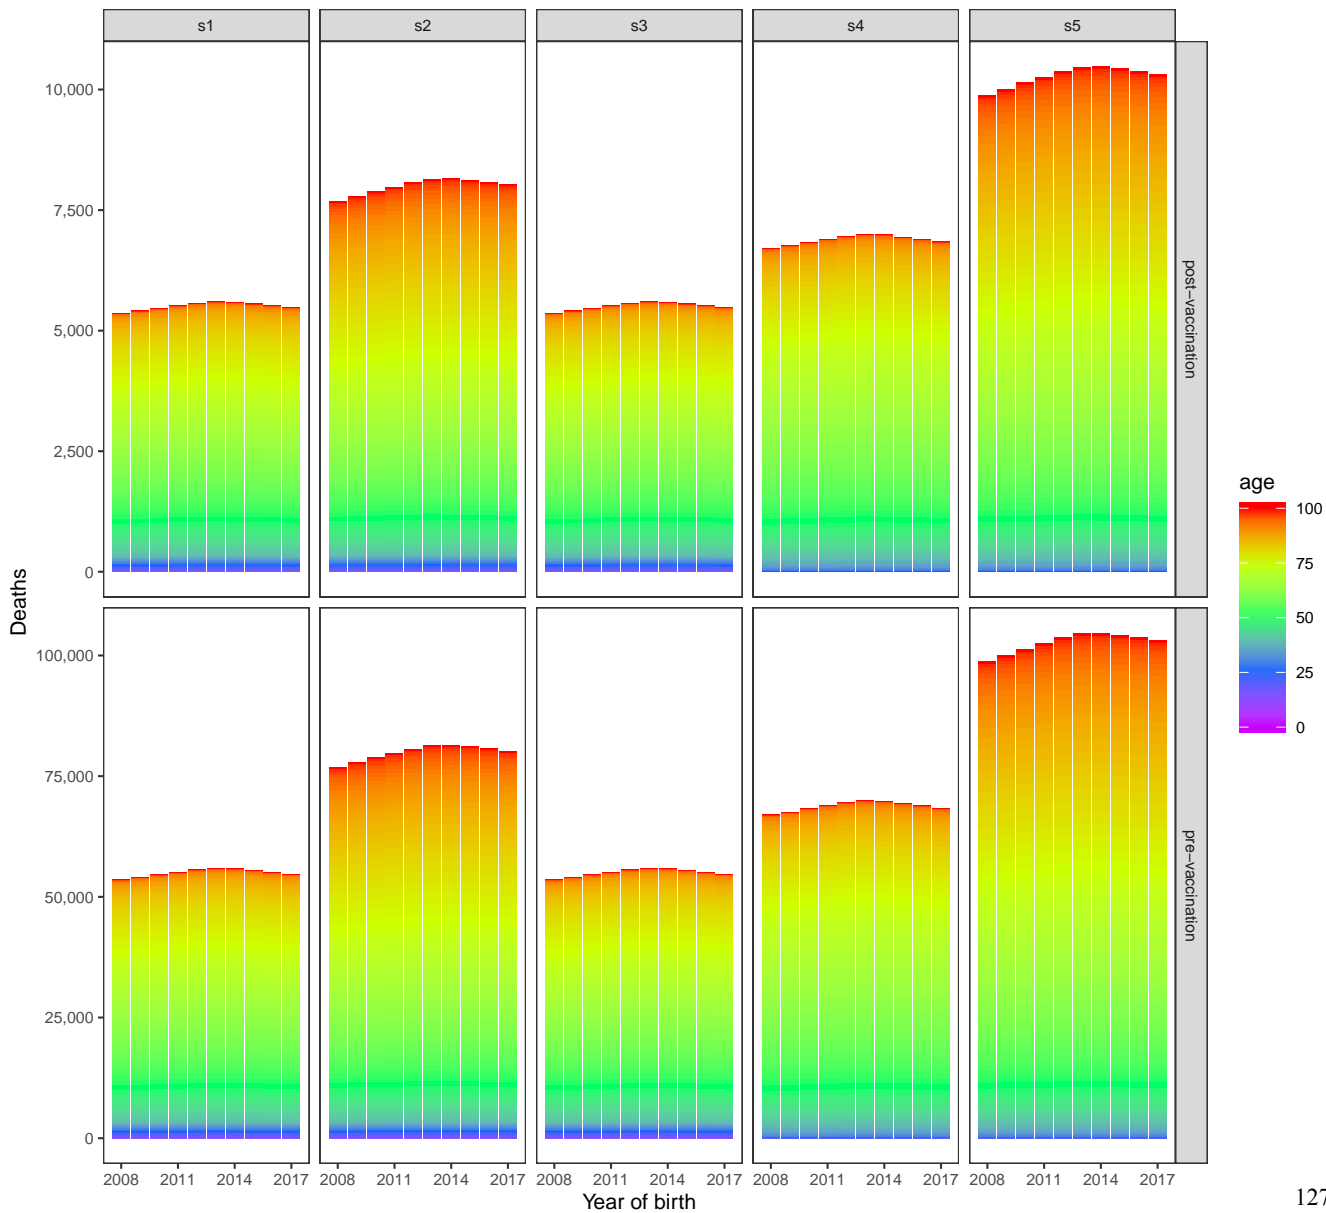

Western Pacific Region  
 Lifetime burden of cervical cancer YLDs  
 caused by HPV 16/18/31/33/45/52/58 pre- and post-vaccination  
 (vaccination age = 12 years / nonavalent vaccine)

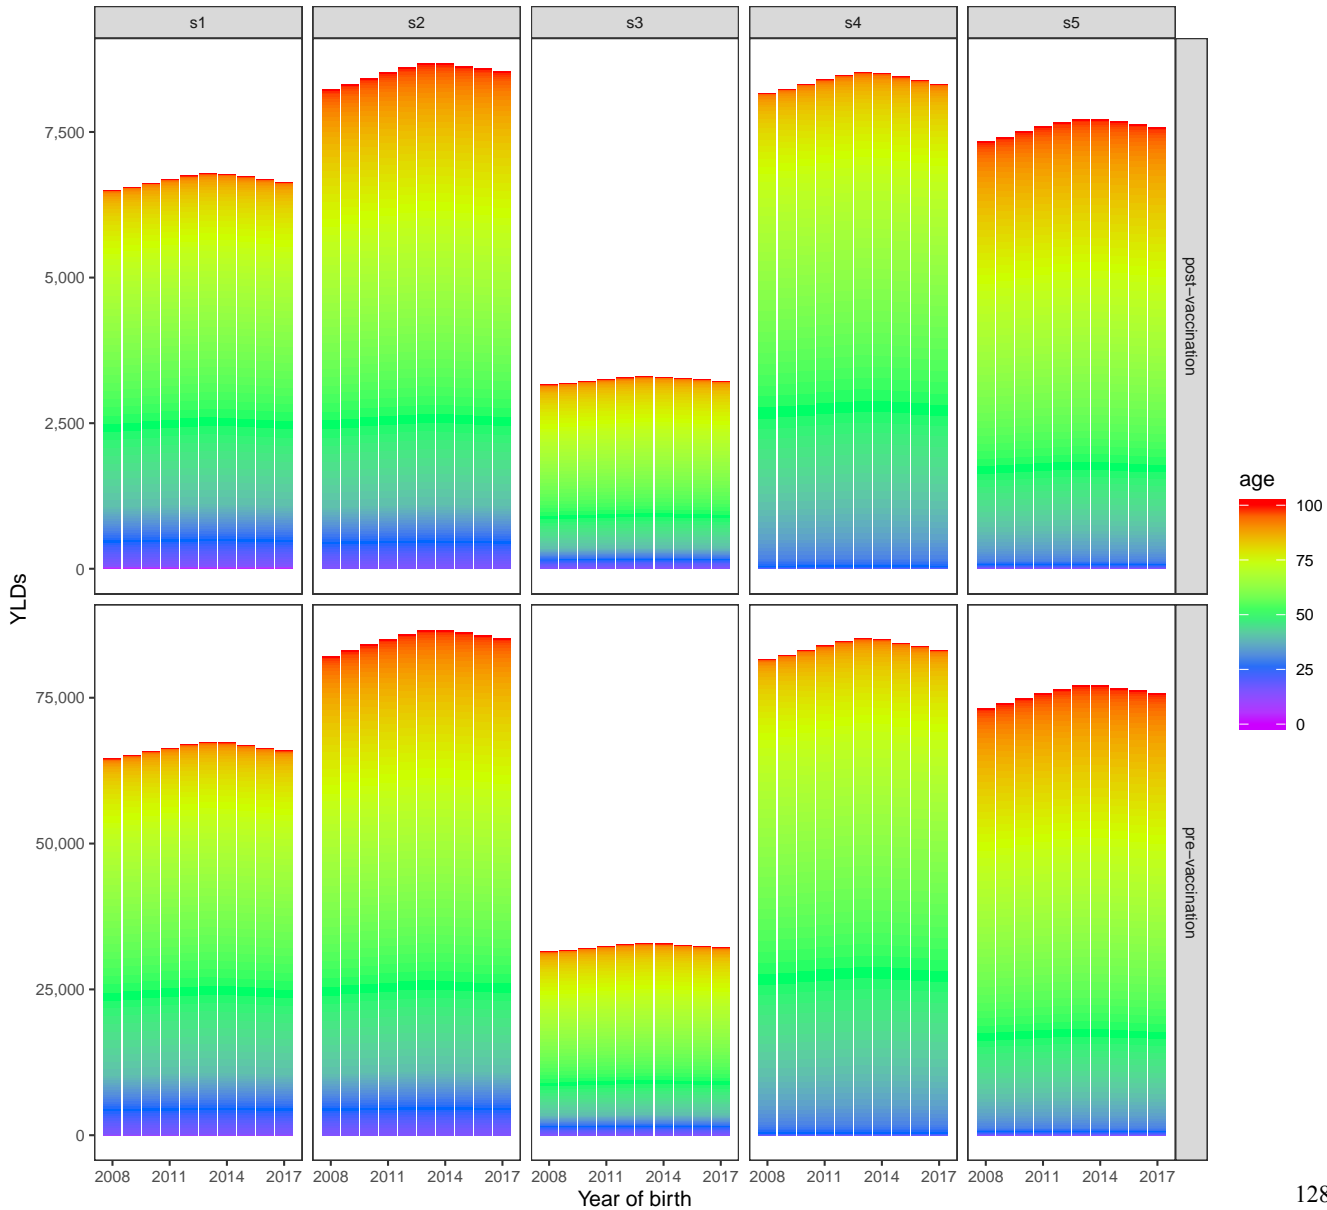

Western Pacific Region  
 Lifetime burden of cervical cancer YLLs  
 caused by HPV 16/18/31/33/45/52/58 pre- and post-vaccination  
 (vaccination age = 12 years / nonavalent vaccine)

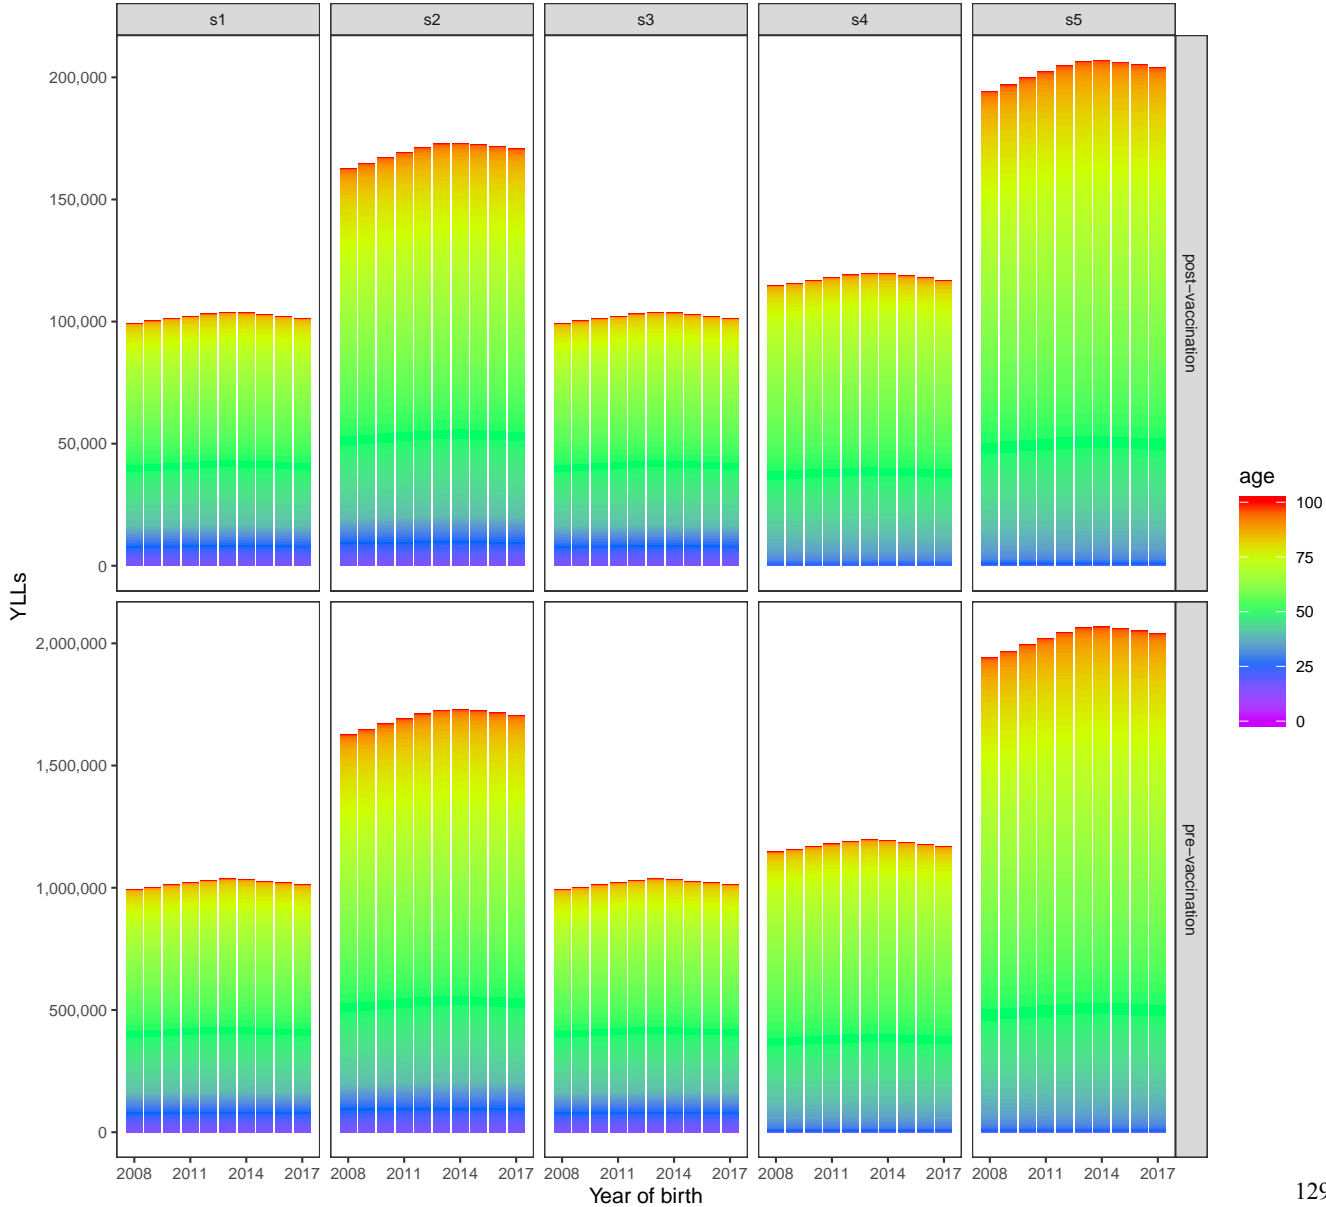



Western Pacific Region  
 Lifetime burden of cervical cancer DALYs  
 caused by HPV 16/18/31/33/45/52/58 pre- and post-vaccination  
 (vaccination age = 12 years / nonavalent vaccine)

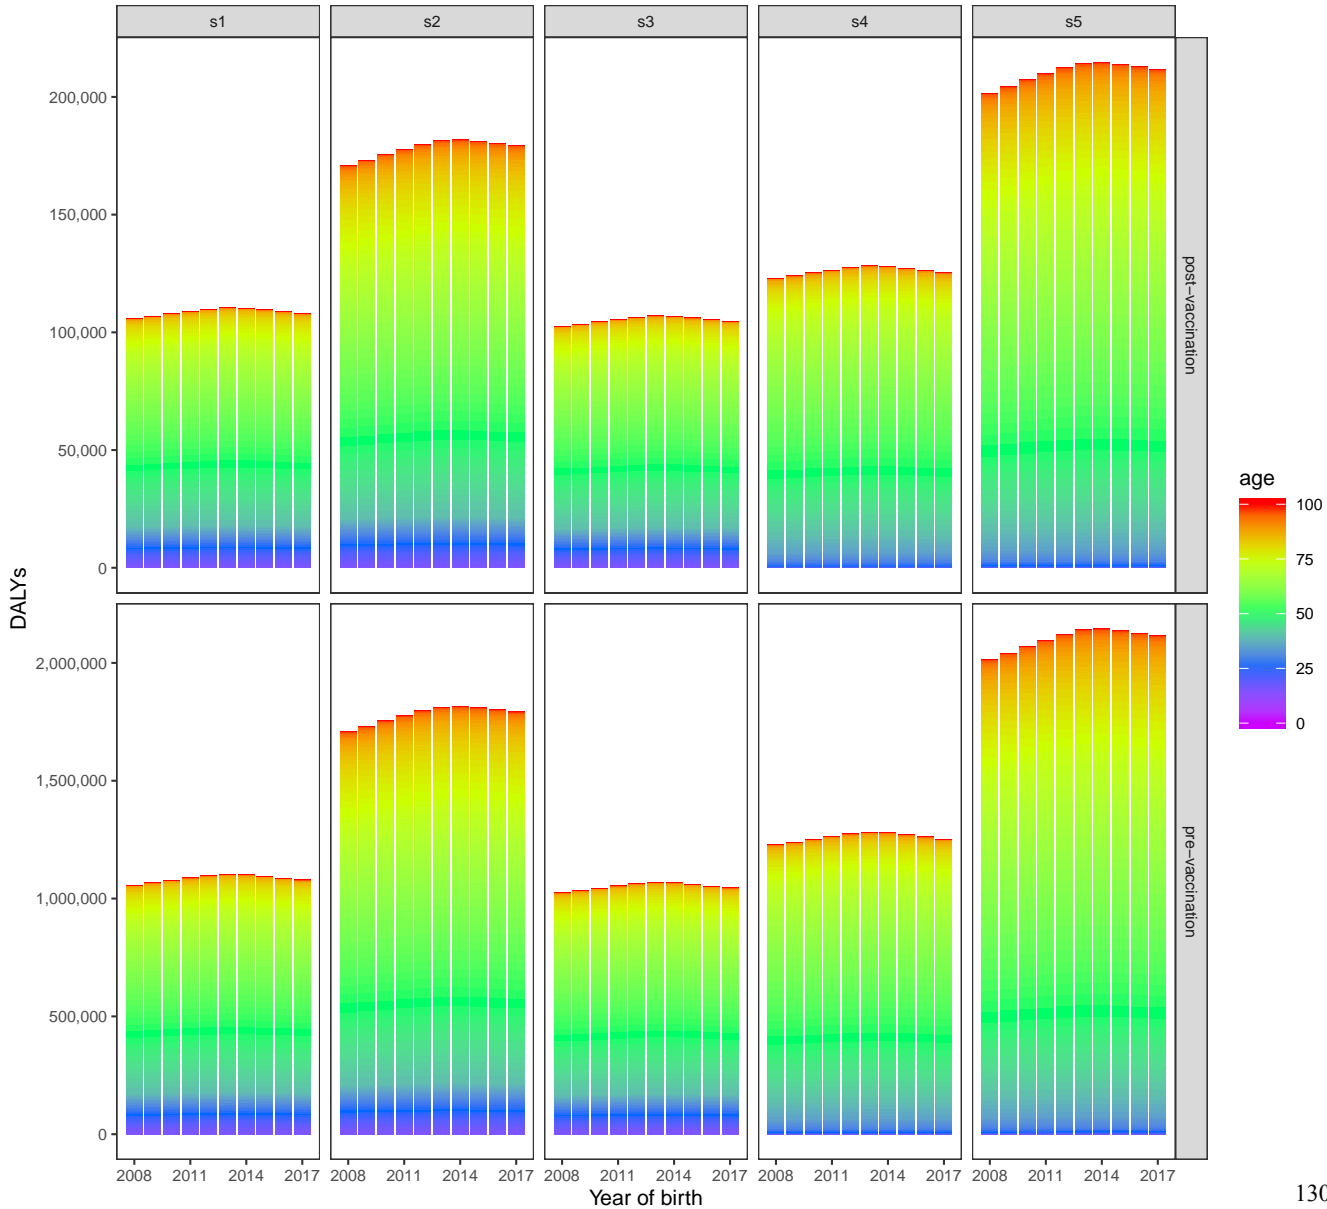

South-East Asia Region  
 Lifetime burden of cervical cancer Cases  
 caused by HPV 16/18/31/33/45/52/58 pre- and post-vaccination  
 (vaccination age = 12 years / nonavalent vaccine)

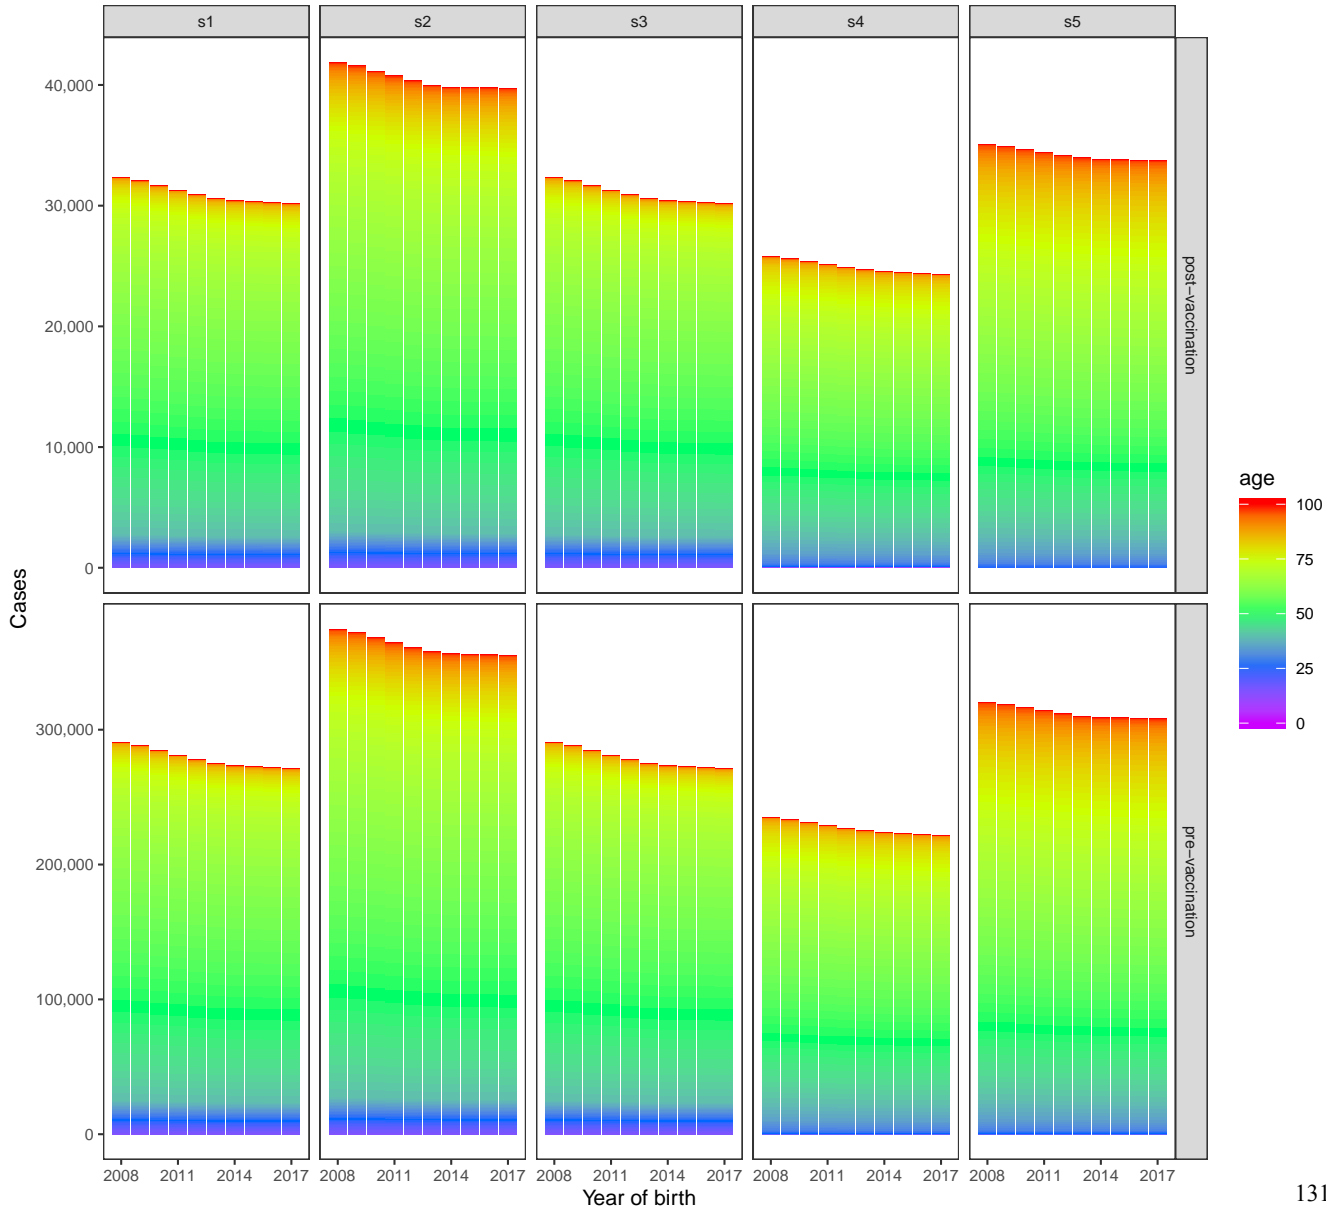

South-East Asia Region  
 Lifetime burden of cervical cancer Deaths  
 caused by HPV 16/18/31/33/45/52/58 pre- and post-vaccination  
 (vaccination age = 12 years / nonavalent vaccine)

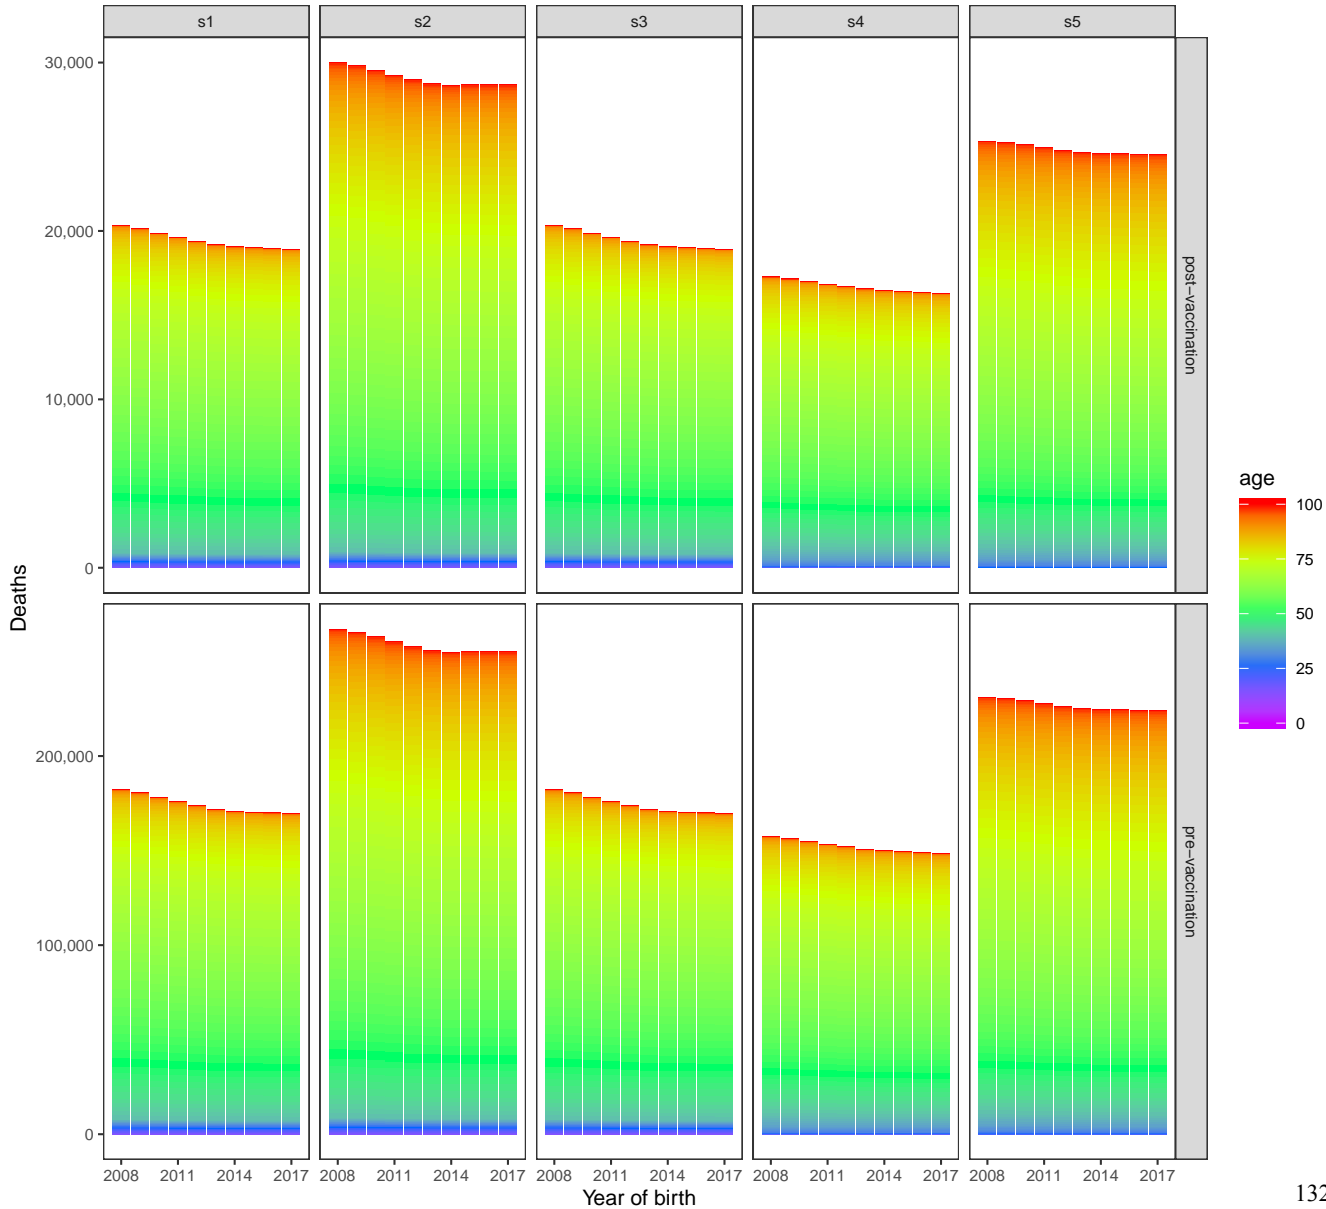

South-East Asia Region  
 Lifetime burden of cervical cancer YLDs  
 caused by HPV 16/18/31/33/45/52/58 pre- and post-vaccination  
 (vaccination age = 12 years / nonavalent vaccine)

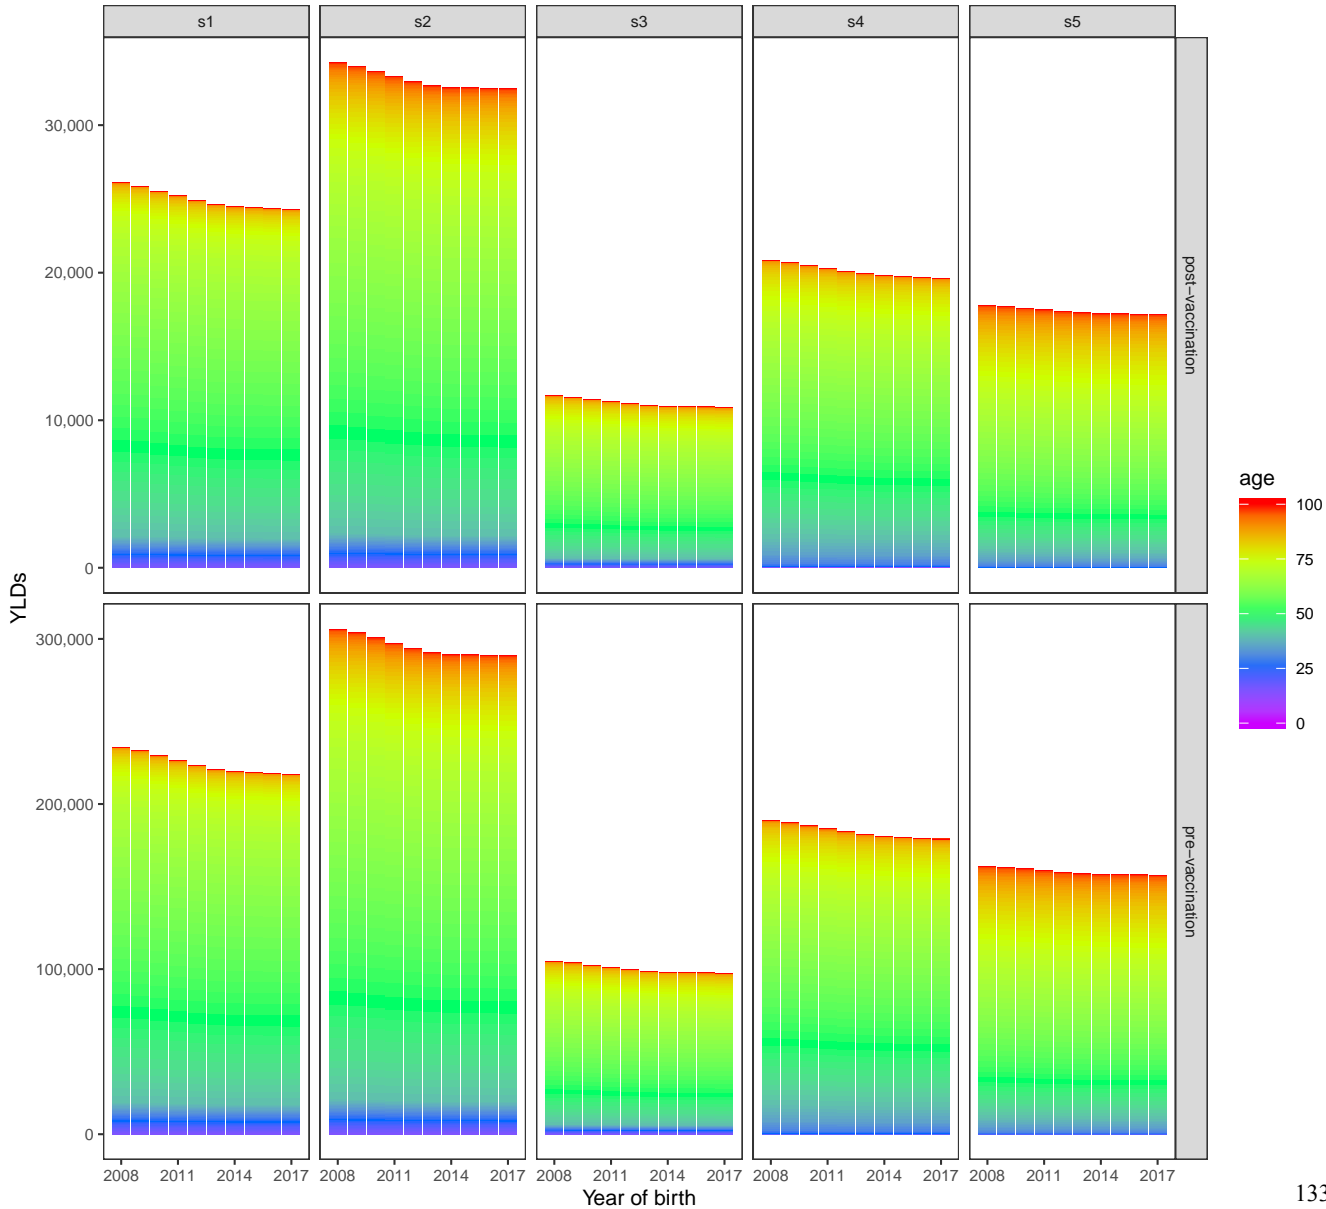

South-East Asia Region  
 Lifetime burden of cervical cancer YLLs  
 caused by HPV 16/18/31/33/45/52/58 pre- and post-vaccination  
 (vaccination age = 12 years / nonavalent vaccine)

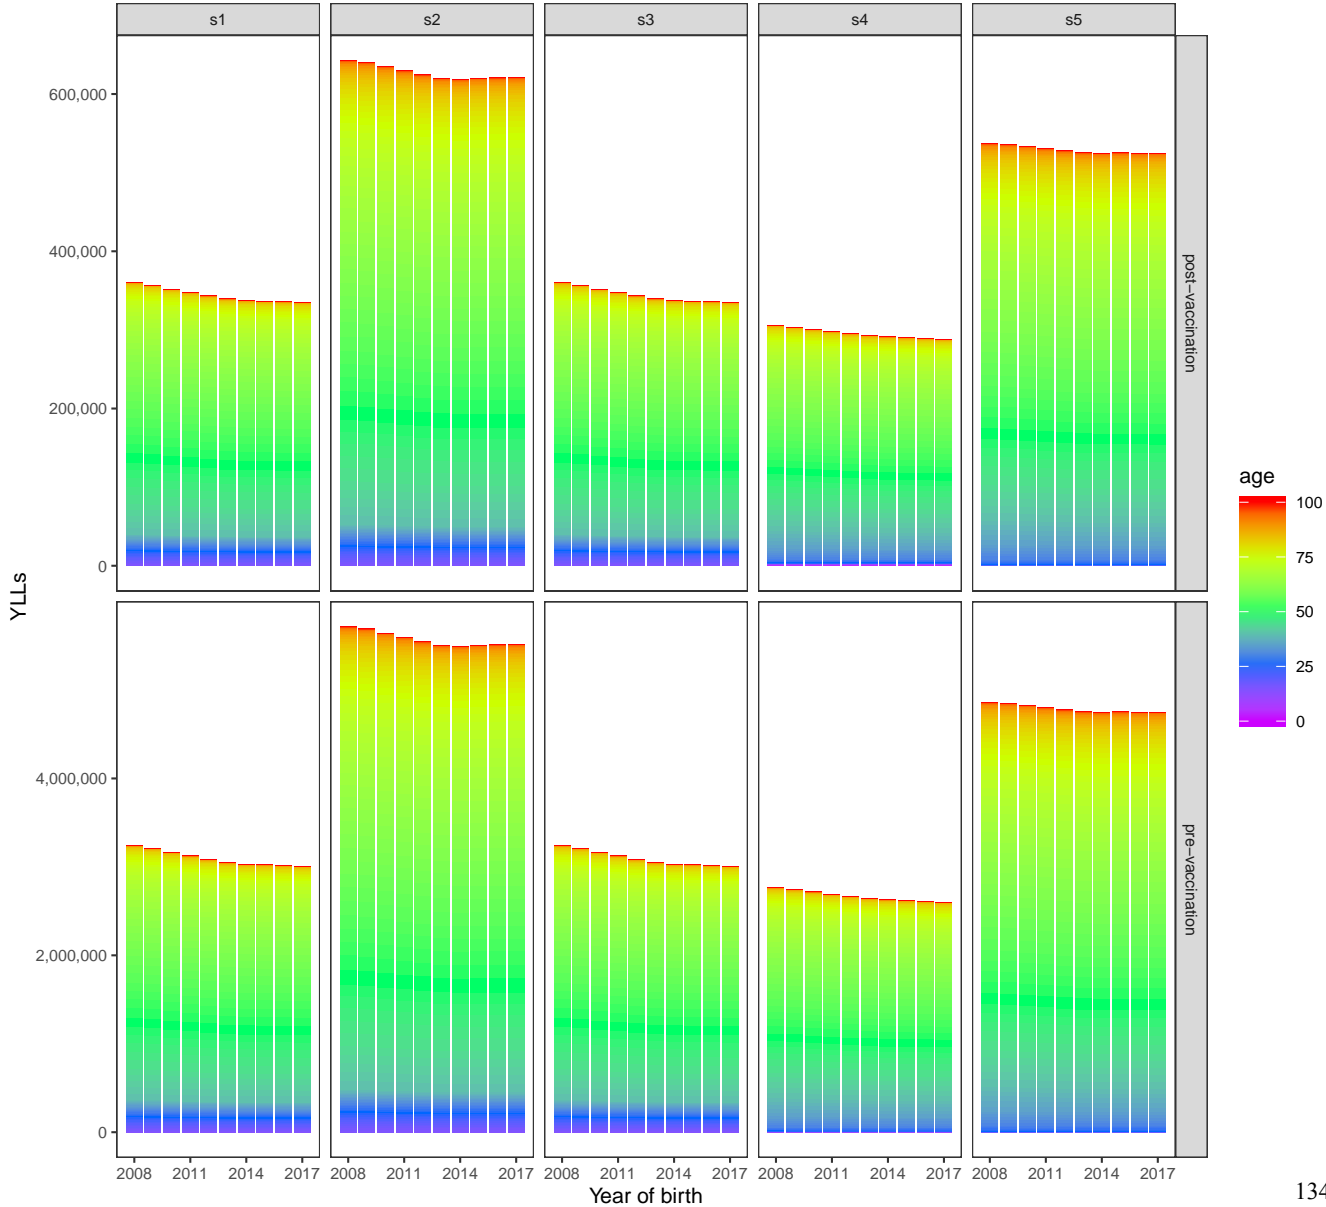

South-East Asia Region  
 Lifetime burden of cervical cancer DALYs  
 caused by HPV 16/18/31/33/45/52/58 pre- and post-vaccination  
 (vaccination age = 12 years / nonavalent vaccine)

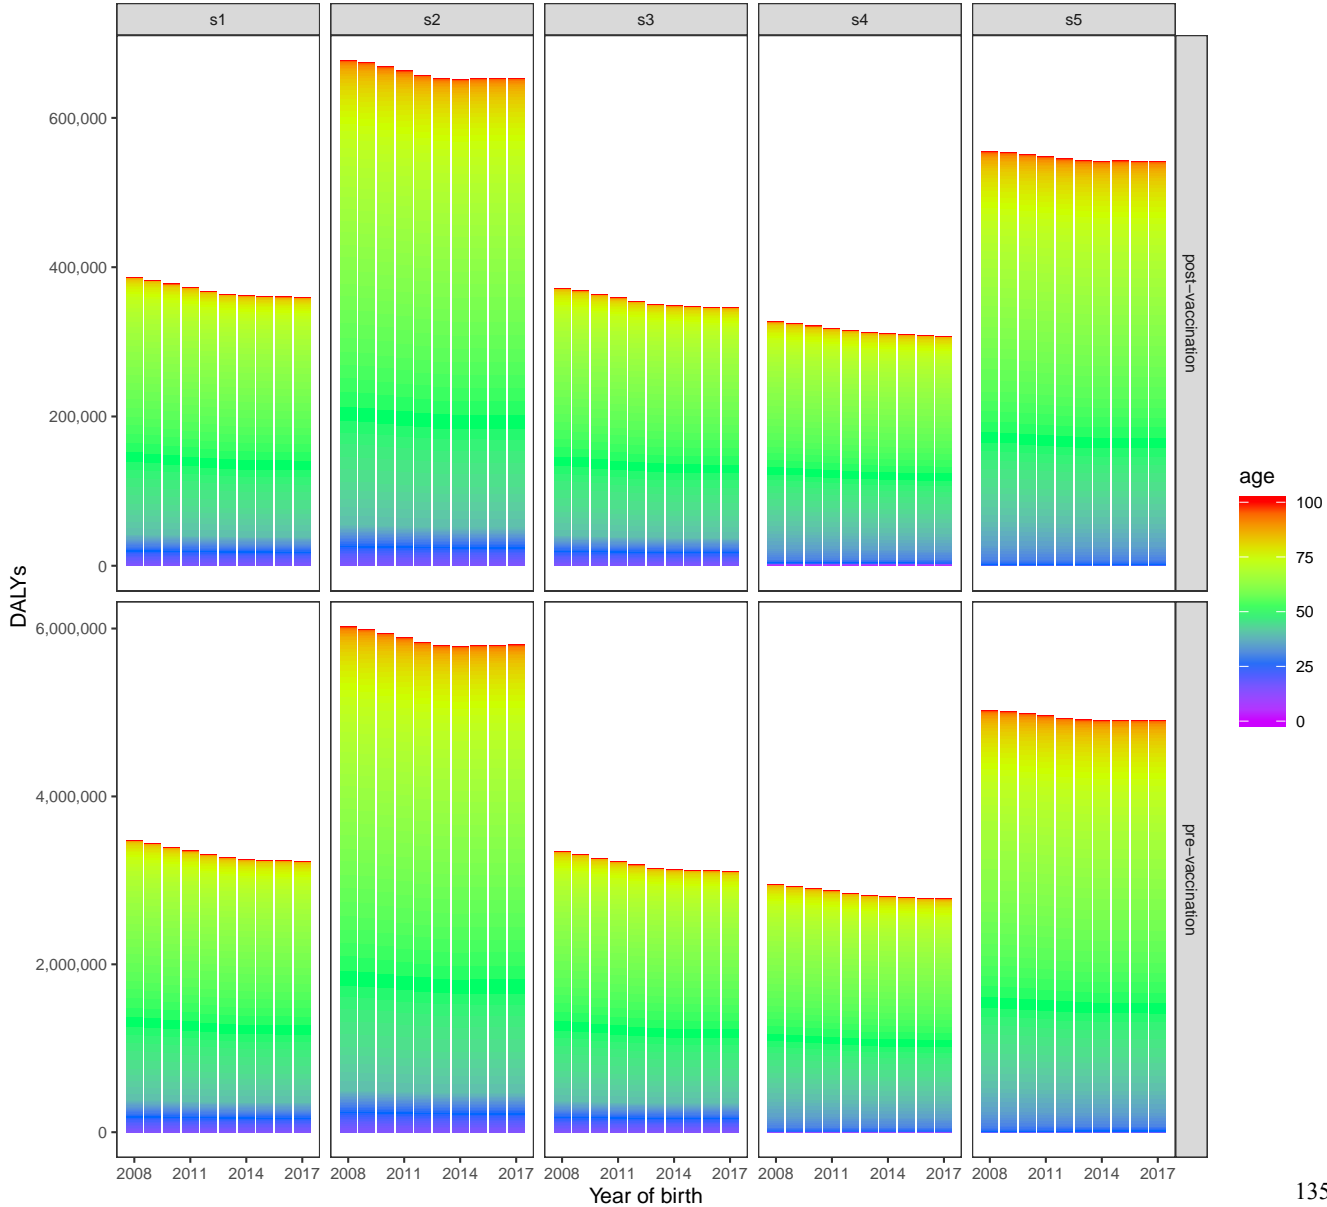

#### **A7. Cervical cancer burden pre- and post-vaccination at the national level**

The lifetime burden of cervical cancer in terms of cases, deaths, YLDs, YLLs and DALYs pre- and post-vaccination at 90% coverage during 2020-2029 in 177 countries for bivalent/quadrivalent and nonavalent vaccination of 9-year-old and 12-year-old girls. Cervical cancer burden pre- and post-vaccination refers to cervical cancer caused by HPV 16/18 and HPV 16/18/31/33/45/52/58 for bivalent/quadrivalent and nonavalent vaccination respectively.

See appendix 2 for data on the lifetime burden of cervical cancer.

## A8. Vaccination impact per 1000 vaccinated girls at the global level

The lifetime impact of vaccination on cases, deaths, YLLs, YLDs and DALYs averted per 1000 vaccinated girls at the global level (in 177 countries) for bivalent/quadrivalent and nonavalent vaccination of 9-year-old and 12-year-old girls.

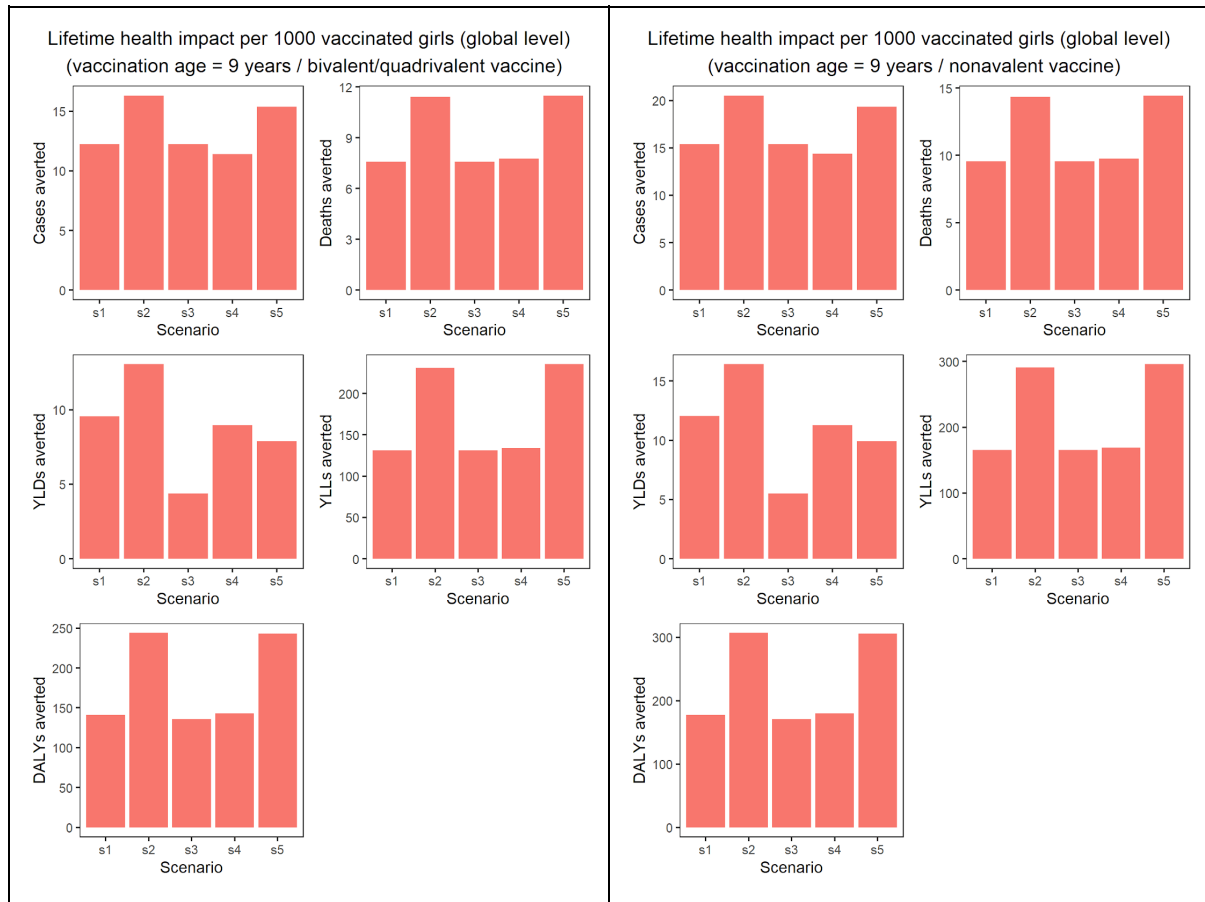



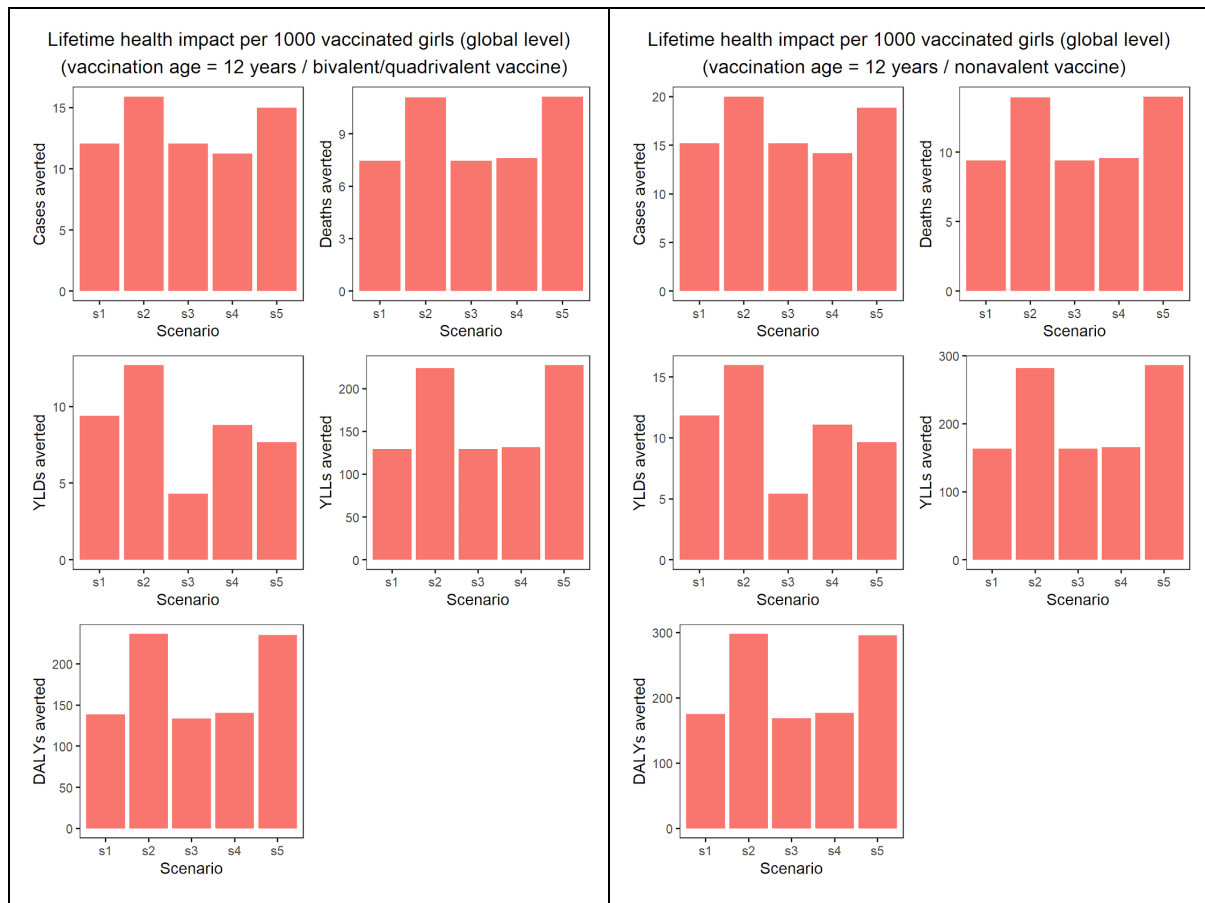

s1 - WHO 2009 demography, GBD 2001 disability weights, GLOBOCAN 2012 cervical cancer burden  
s2 - UNWPP 2019 demography, GBD 2001 disability weights, GLOBOCAN 2012 cervical cancer burden  
s3 - WHO 2009 demography, GBD 2017 disability weights, GLOBOCAN 2012 cervical cancer burden  
s4 - WHO 2009 demography, GBD 2001 disability weights, GLOBOCAN 2018 cervical cancer burden  
s5 - UNWPP 2019 demography, GBD 2017 disability weights, GLOBOCAN 2018 cervical cancer burden

## A9. Global estimates of HPV vaccination impact of 12-year-old girls

Health impact of bivalent/quadrivalent and nonavalent HPV vaccination of 12-year-old girls at 90% coverage during 2020-2029 on the averted lifetime burden of cervical cancer in 177 countries for the 5 comparative scenarios.

| <b>Bivalent/quadrivalent HPV vaccination impact on cervical cancer caused by HPV 16/18</b>     |                                          |               |             |             |              |
|------------------------------------------------------------------------------------------------|------------------------------------------|---------------|-------------|-------------|--------------|
| <b>Scenario</b>                                                                                | <b>Cases</b>                             | <b>Deaths</b> | <b>YLDs</b> | <b>YLLs</b> | <b>DALYs</b> |
|                                                                                                | <b>averted per 1000 vaccinated girls</b> |               |             |             |              |
| s1                                                                                             | 12.1                                     | 7.5           | 9.4         | 130         | 139          |
| s2                                                                                             | 15.9                                     | 11.1          | 12.7        | 224         | 237          |
| s3                                                                                             | 12.1                                     | 7.5           | 4.3         | 130         | 134          |
| s4                                                                                             | 11.2                                     | 7.6           | 8.8         | 132         | 140          |
| s5                                                                                             | 15                                       | 11.1          | 7.7         | 227         | 235          |
| <b>Nonavalent HPV vaccination impact on cervical cancer caused by HPV 16/18/31/33/45/52/58</b> |                                          |               |             |             |              |
| <b>Scenario</b>                                                                                | <b>Cases</b>                             | <b>Deaths</b> | <b>YLDs</b> | <b>YLLs</b> | <b>DALYs</b> |
|                                                                                                | <b>averted per 1000 vaccinated girls</b> |               |             |             |              |
| s1                                                                                             | 15.2                                     | 9.4           | 11.9        | 163         | 175          |
| s2                                                                                             | 20                                       | 13.9          | 16          | 282         | 298          |
| s3                                                                                             | 15.2                                     | 9.4           | 5.4         | 163         | 169          |
| s4                                                                                             | 14.2                                     | 9.6           | 11.1        | 166         | 177          |
| s5                                                                                             | 18.9                                     | 14            | 9.7         | 286         | 296          |

s1 - WHO 2009 demography, GBD 2001 disability weights, GLOBOCAN 2012 cervical cancer burden  
s2 - UNWPP 2019 demography, GBD 2001 disability weights, GLOBOCAN 2012 cervical cancer burden  
s3 - WHO 2009 demography, GBD 2017 disability weights, GLOBOCAN 2012 cervical cancer burden  
s4 - WHO 2009 demography, GBD 2001 disability weights, GLOBOCAN 2018 cervical cancer burden  
s5 - UNWPP 2019 demography, GBD 2017 disability weights, GLOBOCAN 2018 cervical cancer burden

### A10. Number of 12-year-old girls needed to be vaccinated to prevent cervical cancer

The number of 12-year-old girls to be vaccinated to prevent 1 case, 1 death, 1 year loss due to morbidity (YLD), 1 year loss due to premature mortality (YLL), or 1 year loss of healthy life (DALY) from cervical cancer for the 5 comparative scenarios (bivalent/quadrivalent and nonavalent HPV vaccination).

| <b>Bivalent/quadrivalent HPV vaccine</b> |                                                                                                              |                |              |              |               |
|------------------------------------------|--------------------------------------------------------------------------------------------------------------|----------------|--------------|--------------|---------------|
| <b>Scenario</b>                          | <b>Number of girls needed to be vaccinated to prevent cervical cancer caused by HPV 16/18</b>                |                |              |              |               |
|                                          | <b>1 case</b>                                                                                                | <b>1 death</b> | <b>1 YLD</b> | <b>1 YLL</b> | <b>1 DALY</b> |
| s1                                       | 83                                                                                                           | 134            | 106          | 7.7          | 7.2           |
| s2                                       | 63                                                                                                           | 90             | 79           | 4.5          | 4.2           |
| s3                                       | 83                                                                                                           | 134            | 232          | 7.7          | 7.5           |
| s4                                       | 89                                                                                                           | 132            | 114          | 7.6          | 7.1           |
| s5                                       | 67                                                                                                           | 90             | 130          | 4.4          | 4.3           |
| <b>Nonavalent HPV vaccine</b>            |                                                                                                              |                |              |              |               |
| <b>Scenario</b>                          | <b>Number of girls needed to be vaccinated to prevent cervical cancer caused by HPV 16/18/31/33/45/52/58</b> |                |              |              |               |
|                                          | <b>1 case</b>                                                                                                | <b>1 death</b> | <b>1 YLD</b> | <b>1 YLL</b> | <b>1 DALY</b> |
| s1                                       | 66                                                                                                           | 107            | 84           | 6.1          | 5.7           |
| s2                                       | 50                                                                                                           | 72             | 63           | 3.5          | 3.4           |
| s3                                       | 66                                                                                                           | 107            | 184          | 6.1          | 5.9           |
| s4                                       | 71                                                                                                           | 105            | 90           | 6            | 5.7           |
| s5                                       | 53                                                                                                           | 72             | 104          | 3.5          | 3.4           |

s1 - WHO 2009 demography, GBD 2001 disability weights, GLOBOCAN 2012 cervical cancer burden  
s2 - UNWPP 2019 demography, GBD 2001 disability weights, GLOBOCAN 2012 cervical cancer burden  
s3 - WHO 2009 demography, GBD 2017 disability weights, GLOBOCAN 2012 cervical cancer burden  
s4 - WHO 2009 demography, GBD 2001 disability weights, GLOBOCAN 2018 cervical cancer burden  
s5 - UNWPP 2019 demography, GBD 2017 disability weights, GLOBOCAN 2018 cervical cancer burden

### A11. Vaccination impact per 1000 vaccinated 12-year-old girls at the regional level

Lifetime health impact of bivalent/quadrivalent and nonavalent HPV vaccination of 12-year-old girls during 2020-2029 on cases, deaths, YLDs, YLLs and DALYs averted per 1000 vaccinated girls in the 6 WHO regions (estimates after the combined PRIME updates for demography, disability weights and cervical cancer burden).

| <b>Bivalent/quadrivalent HPV vaccine</b> |                                          |               |             |             |              |
|------------------------------------------|------------------------------------------|---------------|-------------|-------------|--------------|
| <b>WHO region</b>                        | <b>Cases</b>                             | <b>Deaths</b> | <b>YLDs</b> | <b>YLLs</b> | <b>DALYs</b> |
|                                          | <b>averted per 1000 vaccinated girls</b> |               |             |             |              |
| African Region                           | 28                                       | 22            | 14          | 441         | 456          |
| South-East Asia Region                   | 15                                       | 11            | 7           | 223         | 231          |
| Region of the Americas                   | 13                                       | 8             | 6           | 168         | 174          |
| Western Pacific Region                   | 10                                       | 7             | 5           | 136         | 141          |
| European Region                          | 9                                        | 5             | 4           | 115         | 120          |
| Eastern Mediterranean Region             | 6                                        | 4             | 3           | 92          | 95           |
| <b>Nonavalent HPV vaccine</b>            |                                          |               |             |             |              |
| <b>WHO region</b>                        | <b>Cases</b>                             | <b>Deaths</b> | <b>YLDs</b> | <b>YLLs</b> | <b>DALYs</b> |
|                                          | <b>averted per 1000 vaccinated girls</b> |               |             |             |              |
| African Region                           | 34                                       | 27            | 18          | 546         | 563          |
| South-East Asia Region                   | 19                                       | 14            | 9           | 285         | 295          |
| Region of the Americas                   | 16                                       | 10            | 8           | 215         | 223          |
| Western Pacific Region                   | 13                                       | 9             | 7           | 178         | 184          |
| European Region                          | 11                                       | 6             | 5           | 140         | 145          |
| Eastern Mediterranean Region             | 7                                        | 6             | 4           | 115         | 119          |

## A12. Vaccination impact per 1000 vaccinated 12-year-old girls at the regional level

Lifetime health impact of bivalent/quadrivalent and nonavalent HPV vaccination of 12-year-old girls during 2020-2029 on cases, deaths and DALYs averted per 1000 vaccinated girls in the 6 WHO regions (estimates after the combined PRIME updates for demography, disability weights and cervical cancer burden).

Lifetime health impact per 1000 vaccinated girls (regional level)  
(bivalent/quadrivalent HPV vaccination of 12-year-old girls)

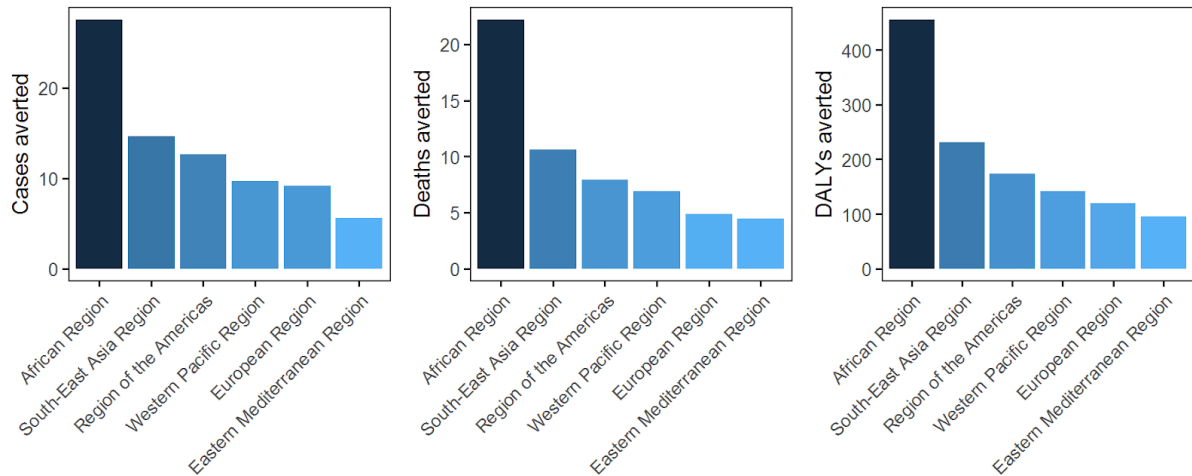

Lifetime health impact per 1000 vaccinated girls (regional level)  
(nonavalent HPV vaccination of 12-year-old girls)

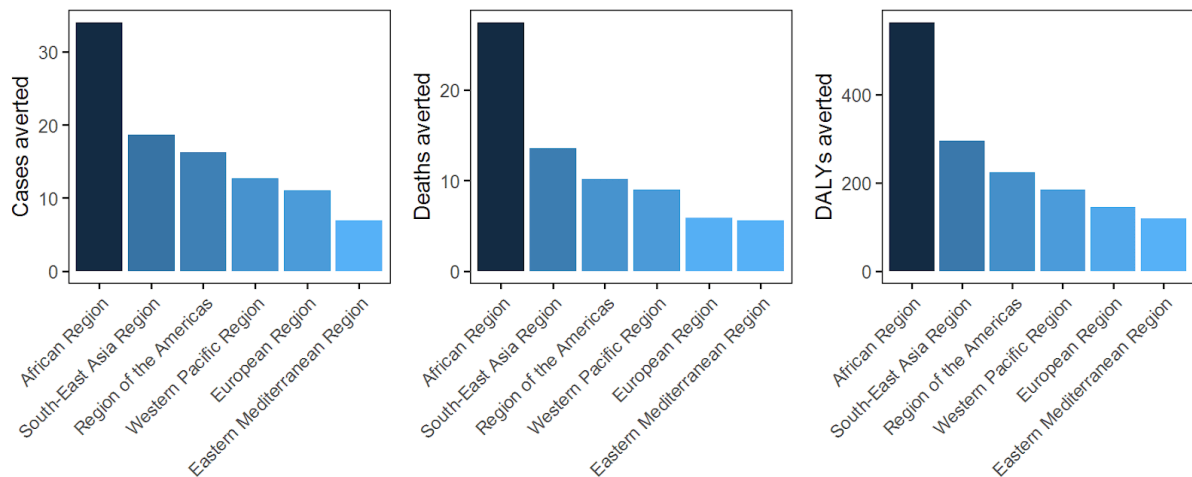

### **A13. Vaccination impact per 1000 vaccinated girls at the regional level**

Lifetime health impact of HPV vaccination during 2020-2029 on cases, deaths, YLLs, YLDs and DALYs averted per 1000 vaccinated girls in the 6 WHO regions for bivalent/quadrivalent and nonavalent vaccination of 9-year-old and 12-year-old girls.

# Lifetime health impact per 1000 vaccinated girls – African Region (vaccination age = 9 years / bivalent/quadrivalent vaccine)

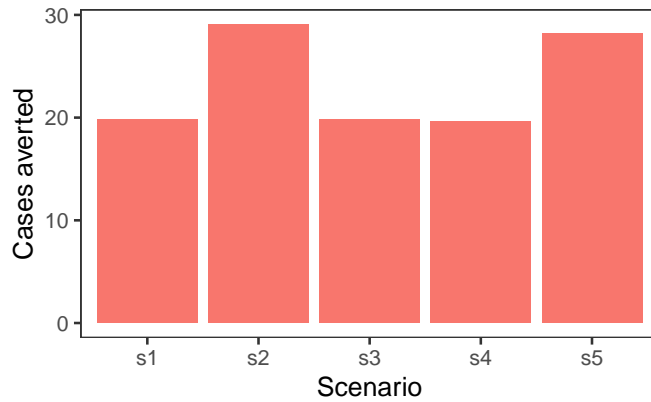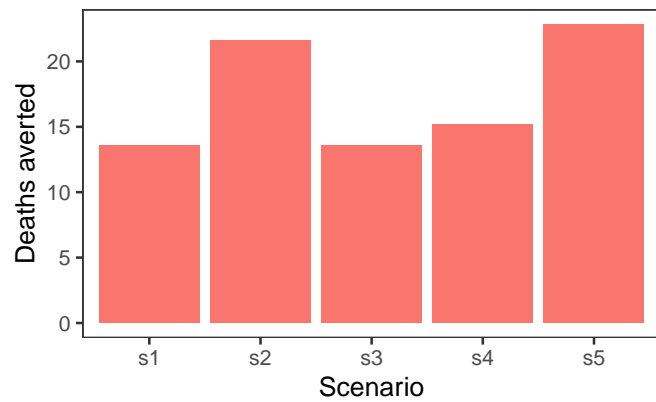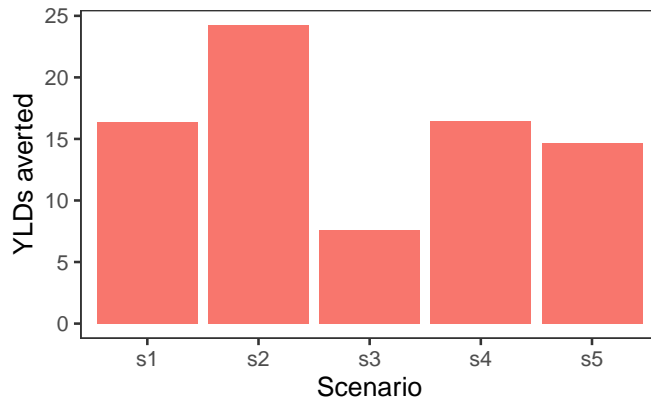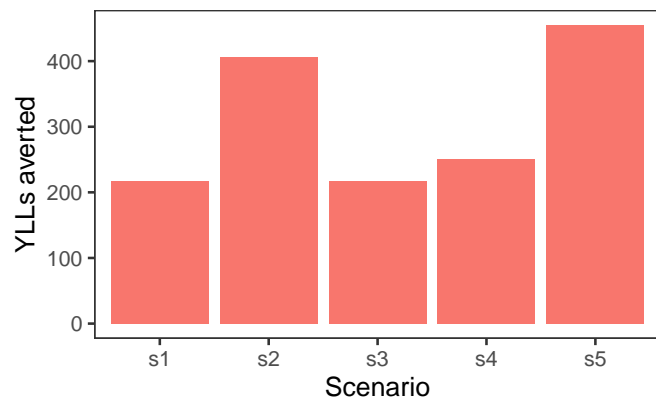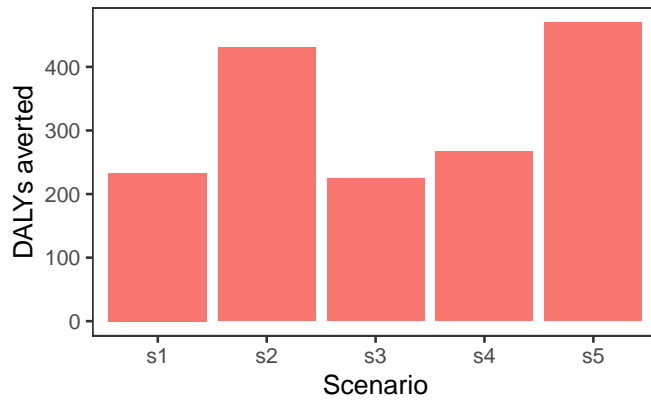

# Lifetime health impact per 1000 vaccinated girls – Region of the Americas (vaccination age = 9 years / bivalent/quadrivalent vaccine)

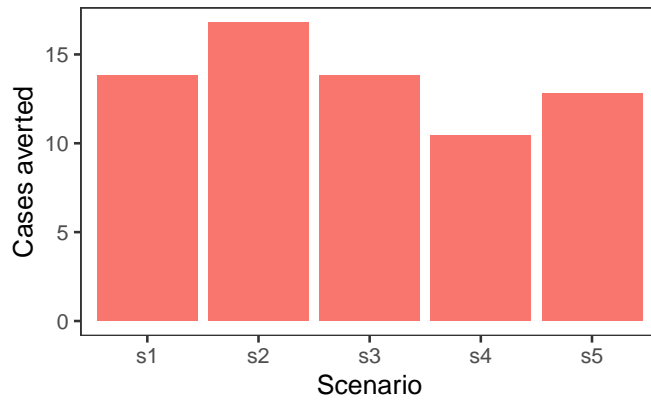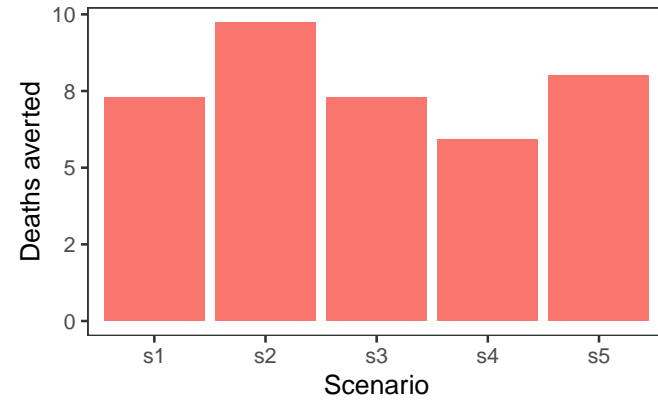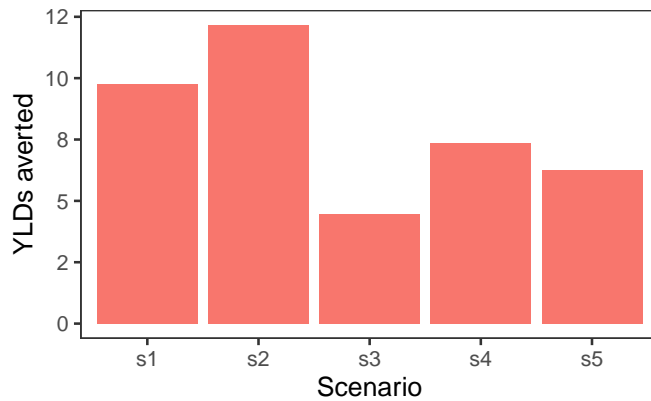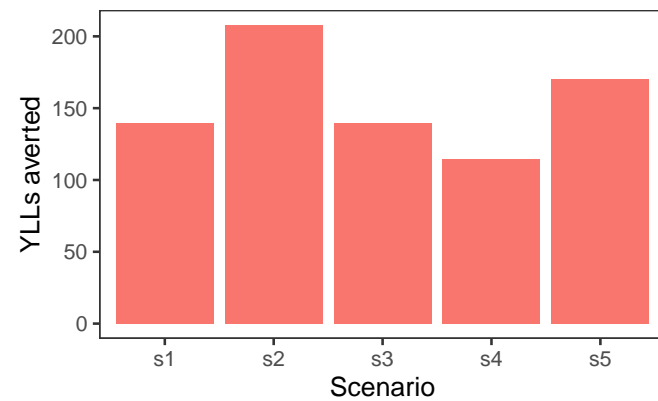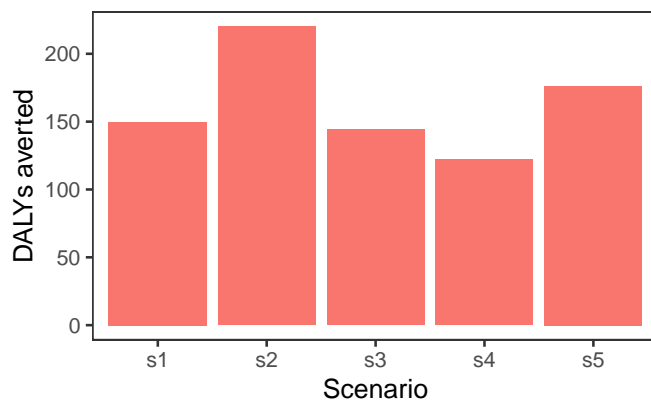



# Lifetime health impact per 1000 vaccinated girls – Eastern Mediterranean Region (vaccination age = 9 years / bivalent/quadrivalent vaccine)

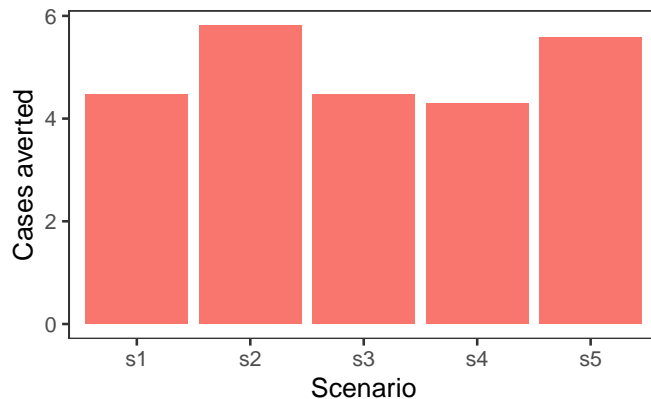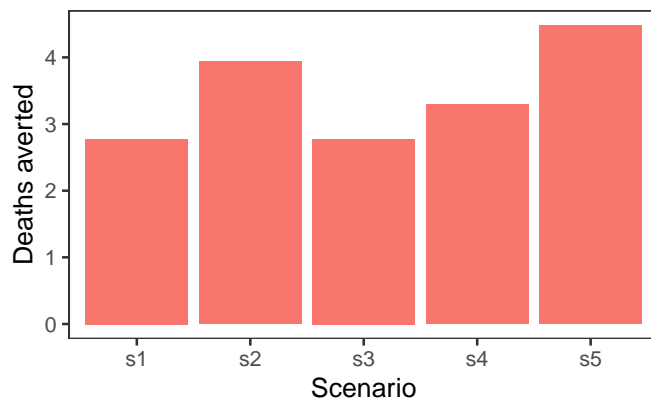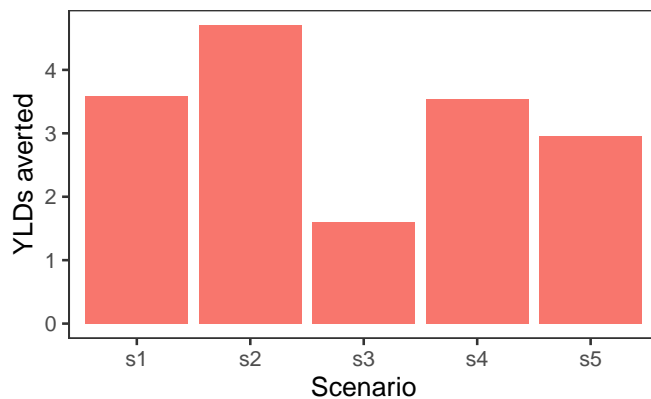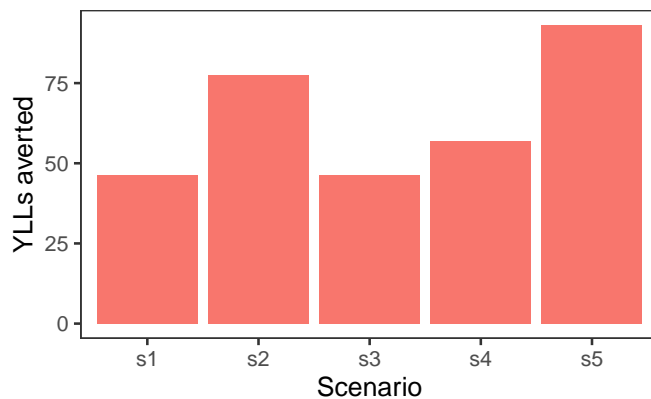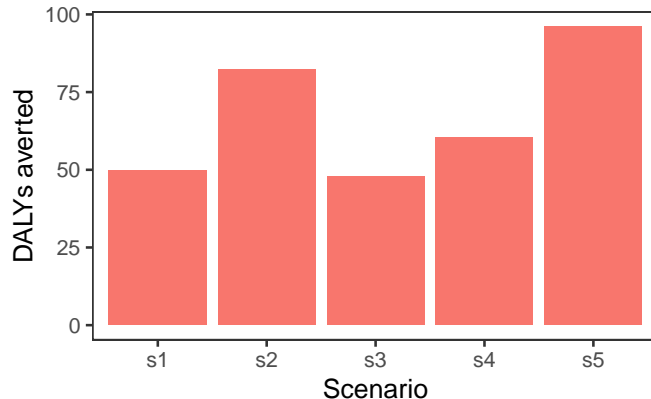

# Lifetime health impact per 1000 vaccinated girls – European Region (vaccination age = 9 years / bivalent/quadrivalent vaccine)

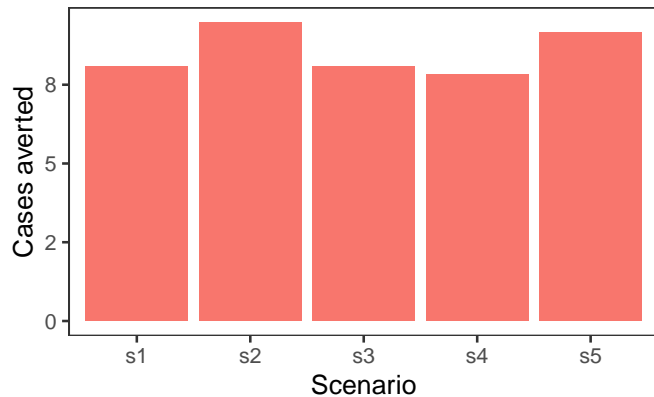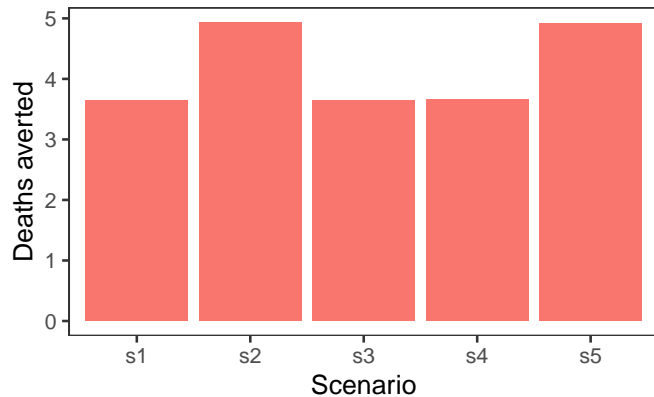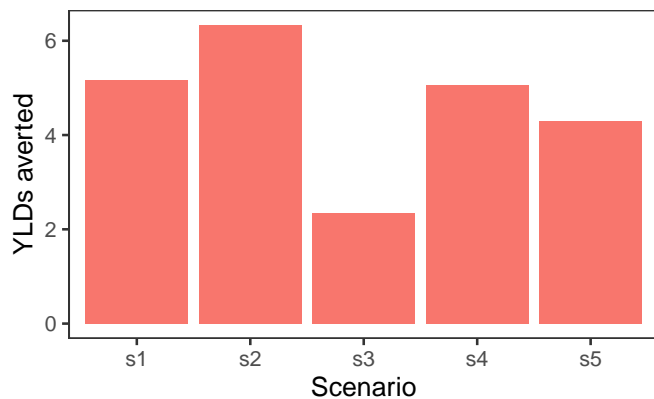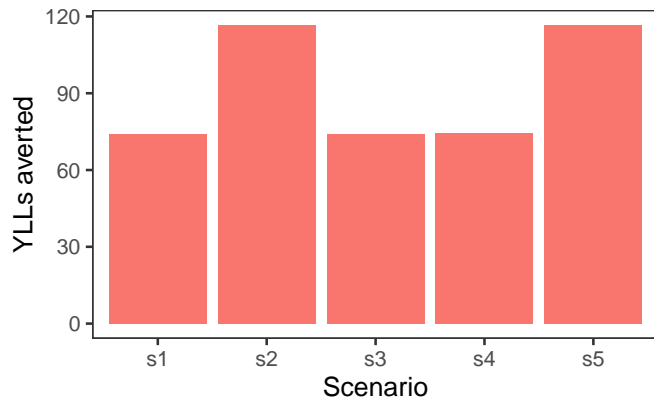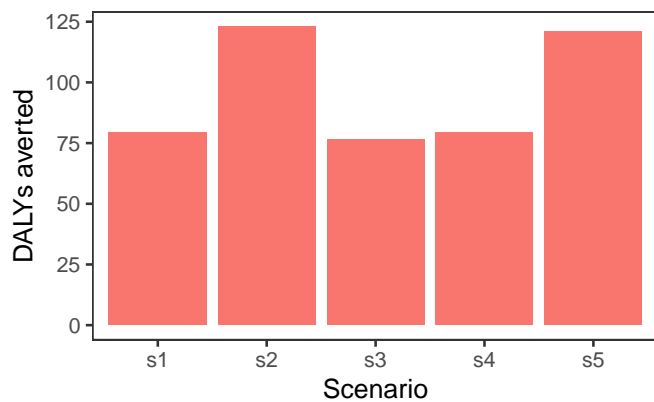

# Lifetime health impact per 1000 vaccinated girls – South–East Asia Region (vaccination age = 9 years / bivalent/quadrivalent vaccine)

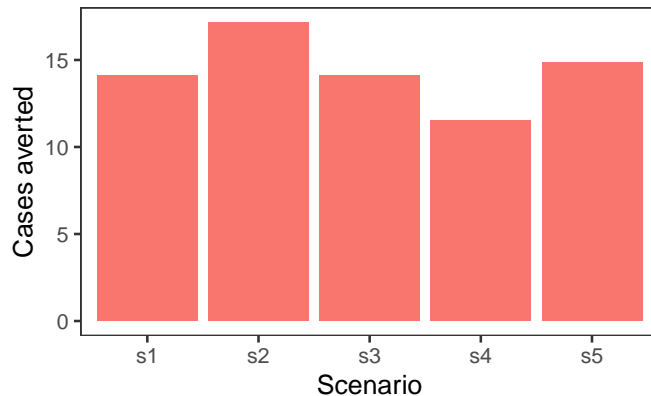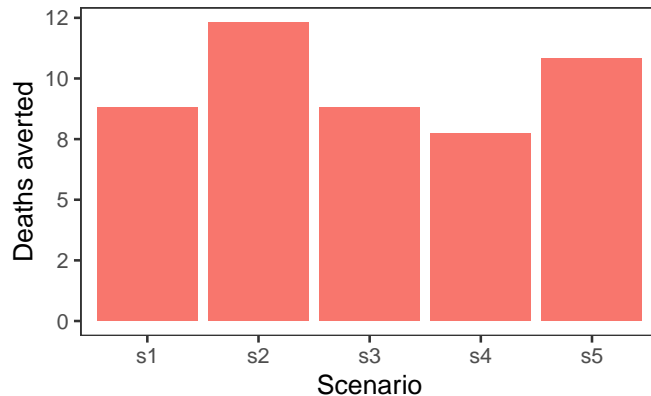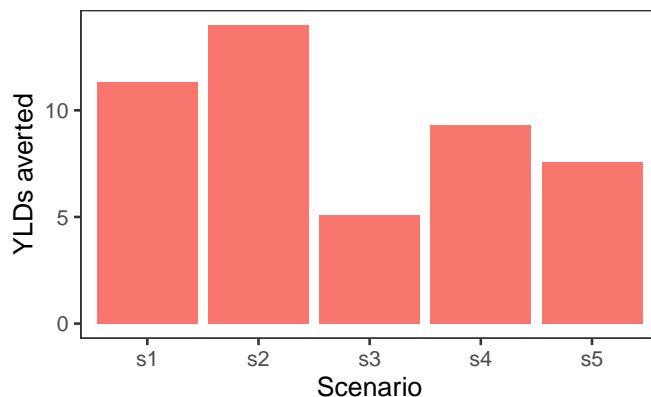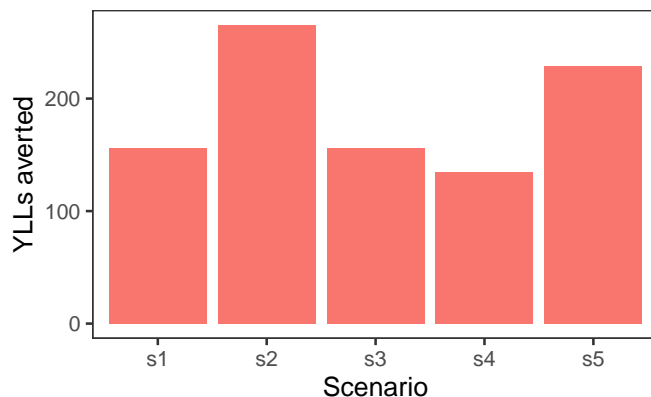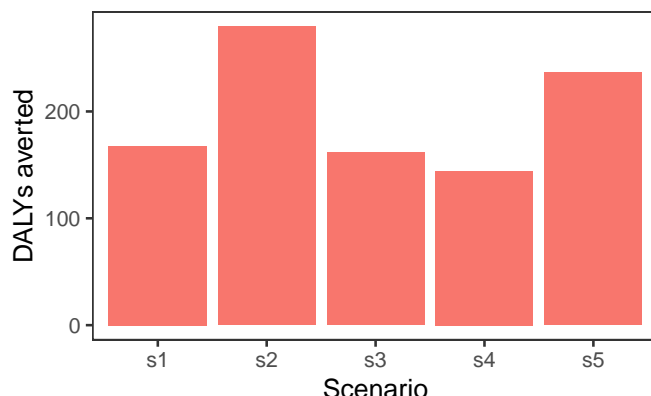

# Lifetime health impact per 1000 vaccinated girls – Western Pacific Region (vaccination age = 9 years / bivalent/quadrivalent vaccine)

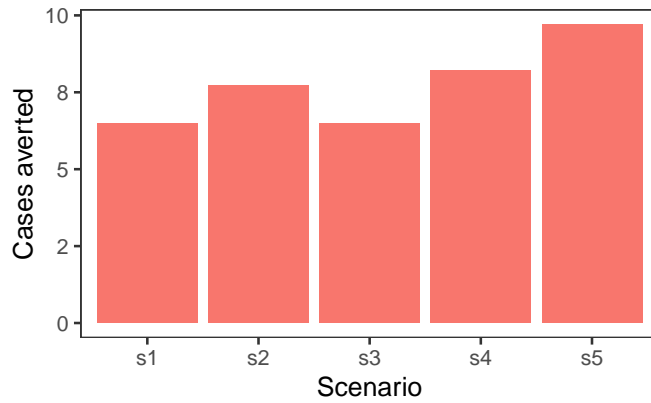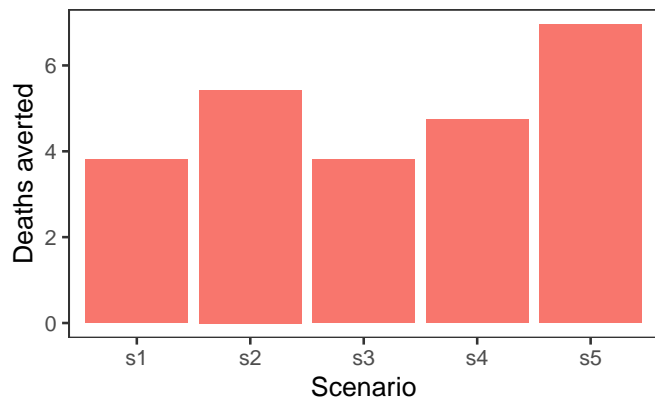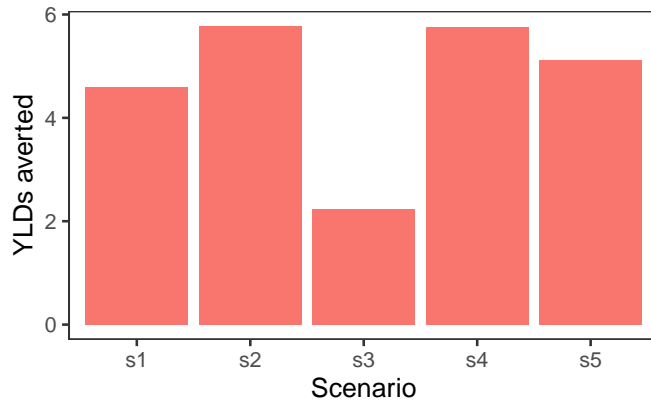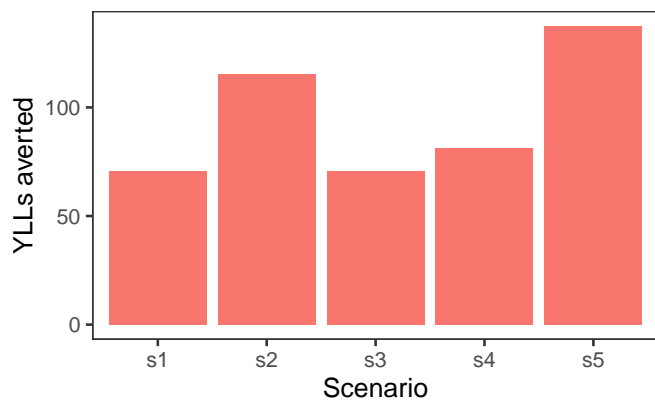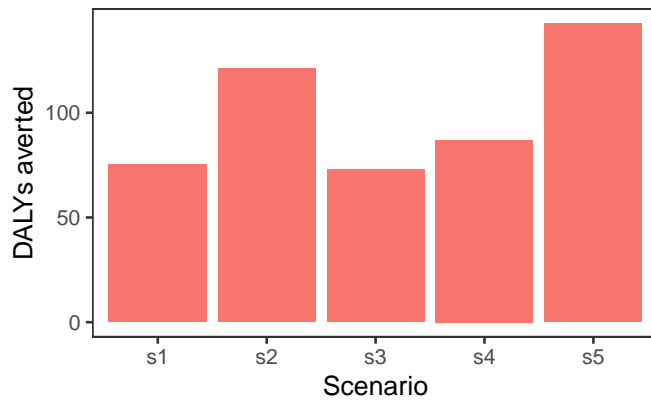

# Lifetime health impact per 1000 vaccinated girls – African Region (vaccination age = 9 years / nonavalent vaccine)

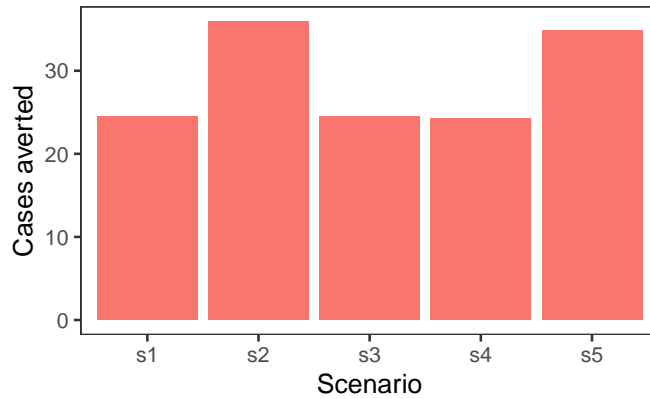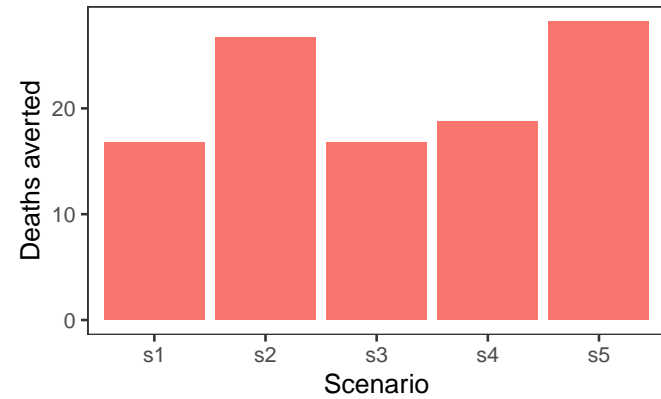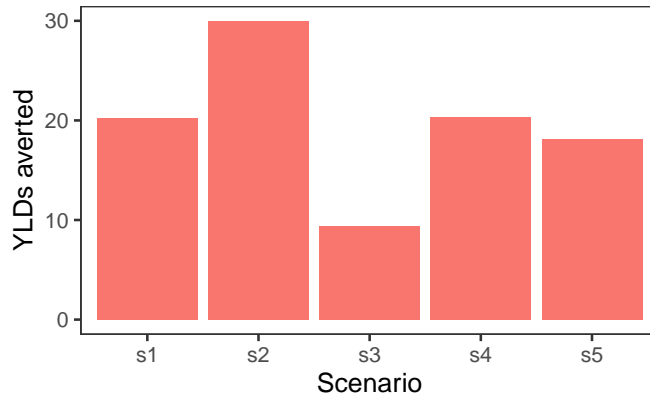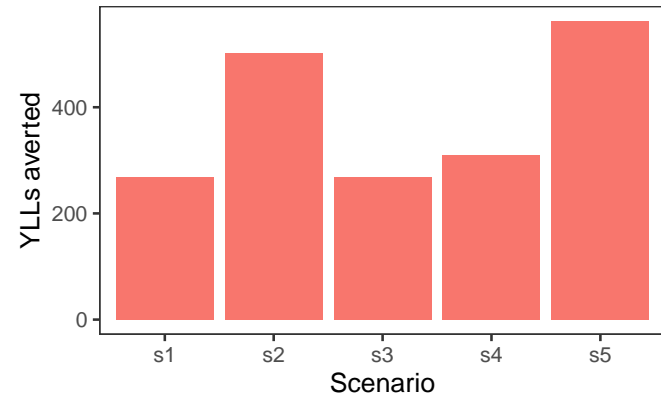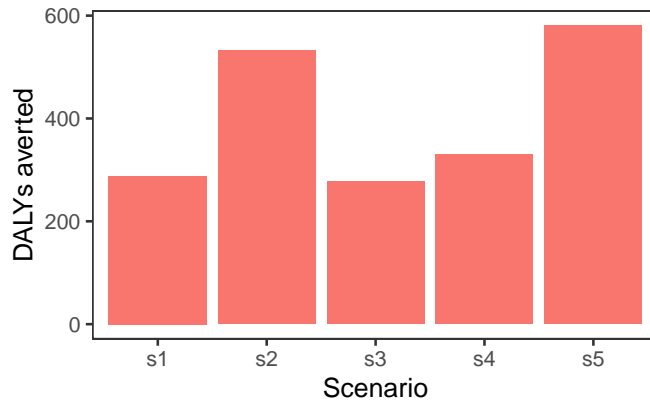

# Lifetime health impact per 1000 vaccinated girls – Region of the Americas (vaccination age = 9 years / nonavalent vaccine)

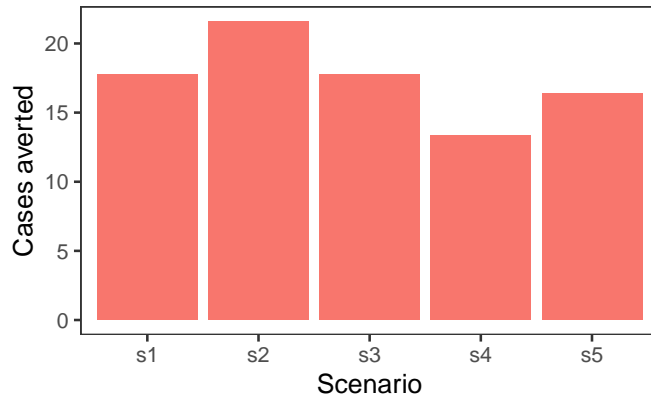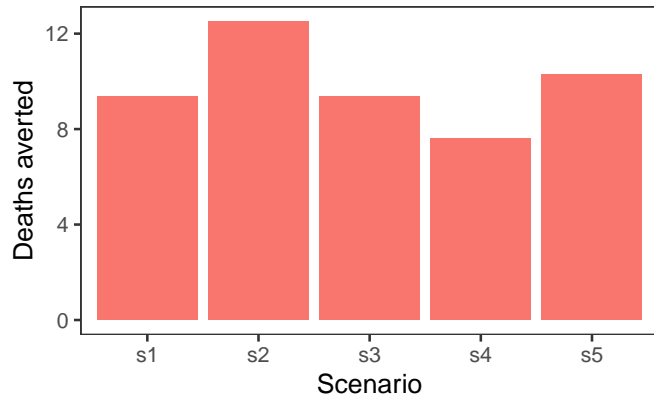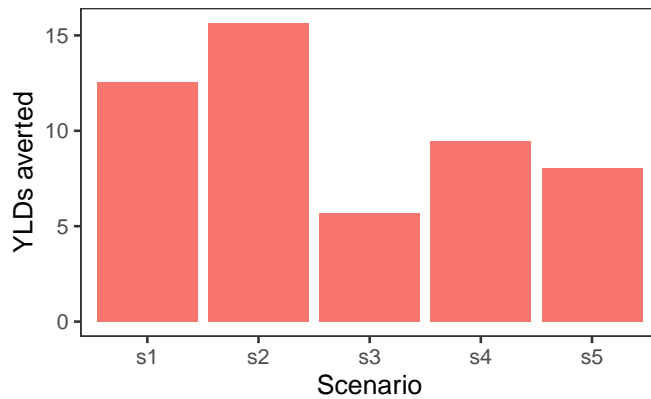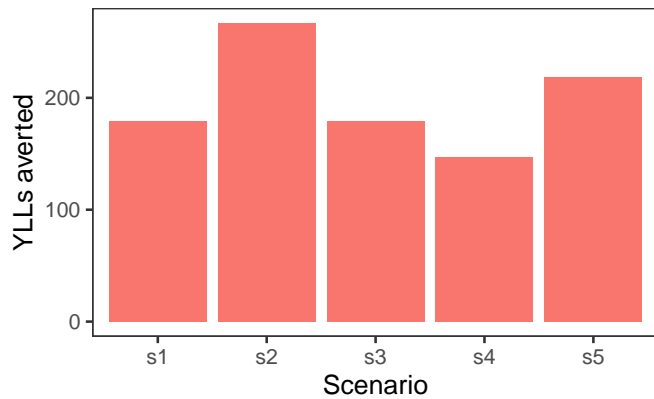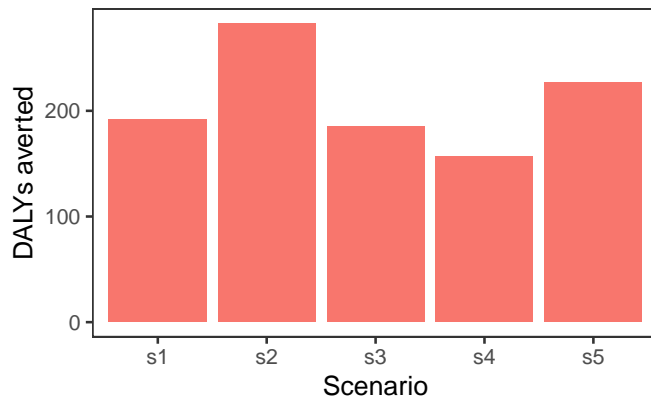

# Lifetime health impact per 1000 vaccinated girls – Eastern Mediterranean Region (vaccination age = 9 years / nonavalent vaccine)

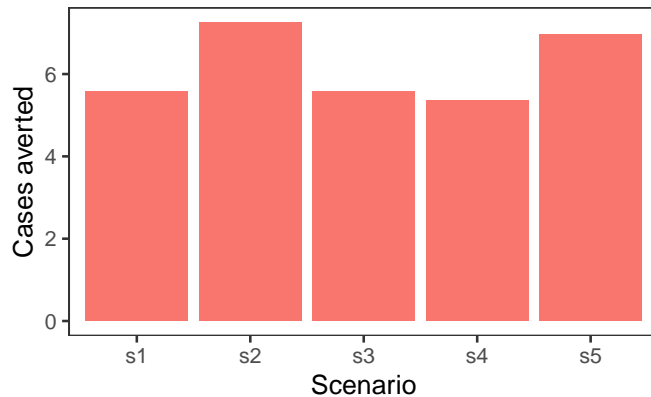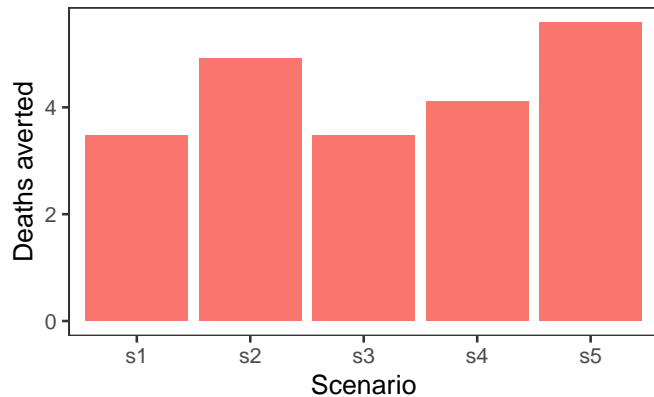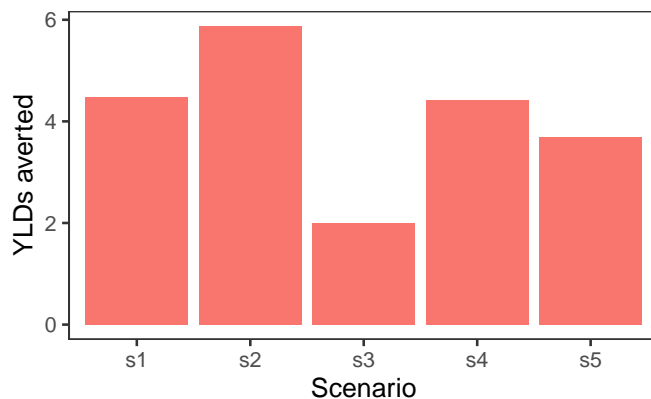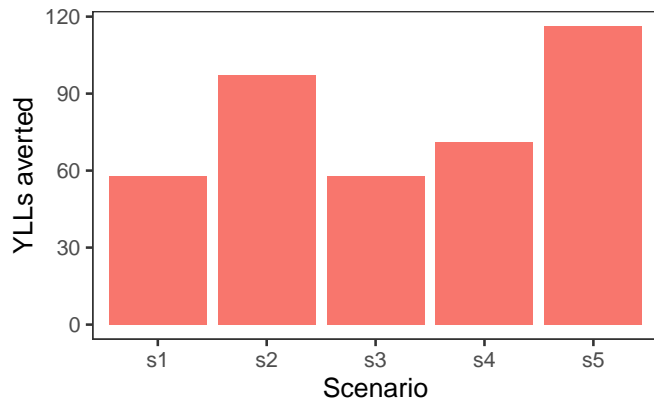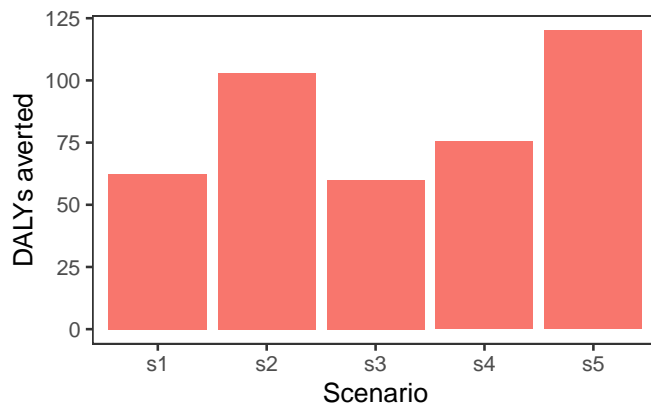

# Lifetime health impact per 1000 vaccinated girls – European Region (vaccination age = 9 years / nonavalent vaccine)

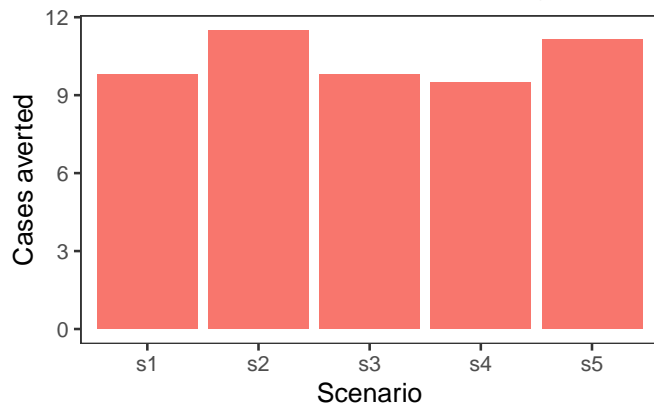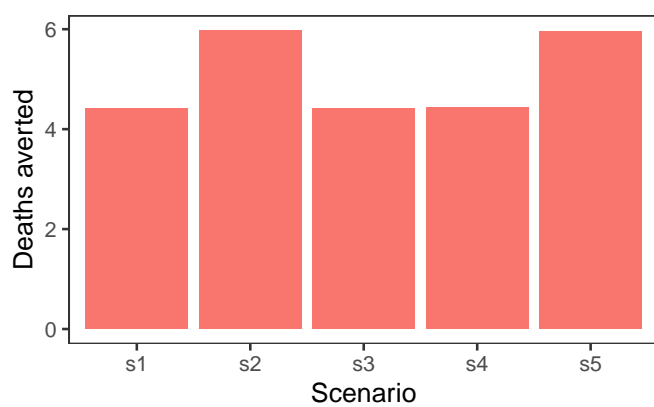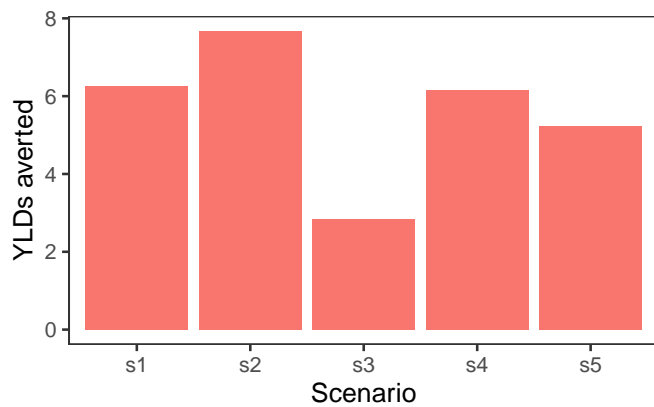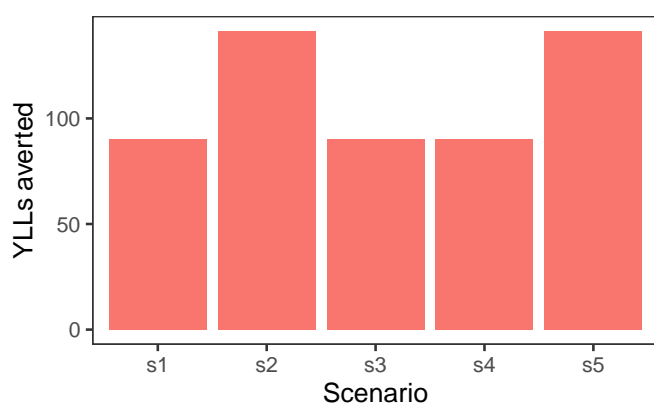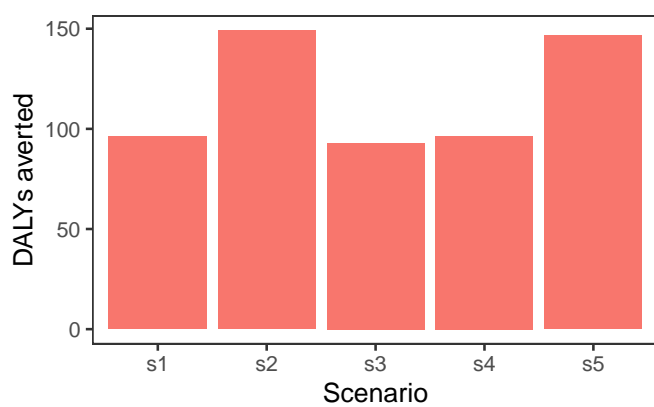



# Lifetime health impact per 1000 vaccinated girls – South–East Asia Region (vaccination age = 9 years / nonavalent vaccine)

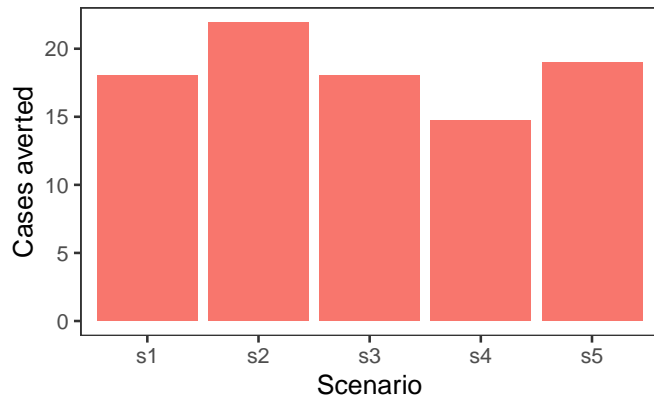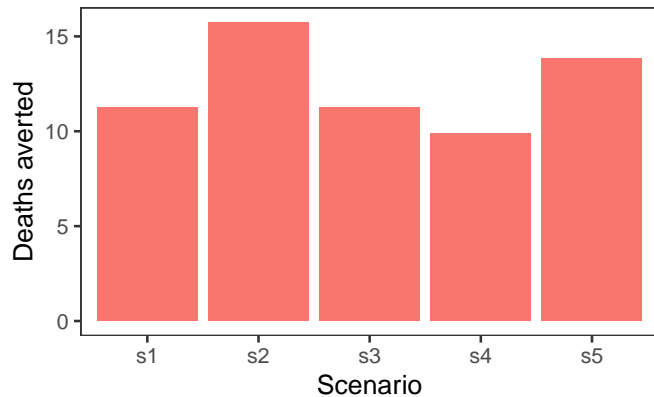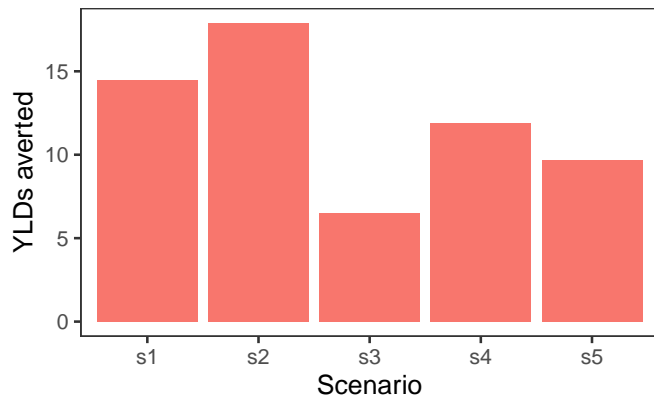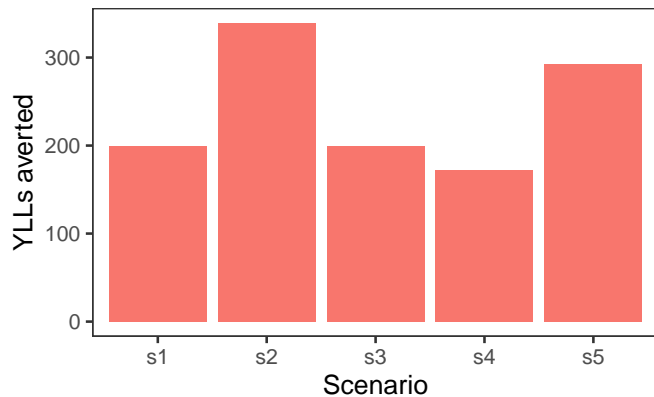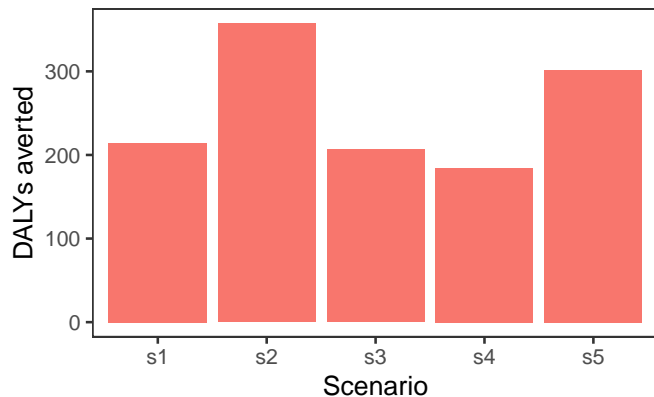

Lifetime health impact per 1000 vaccinated girls – Western Pacific Region  
(vaccination age = 9 years / nonavalent vaccine)

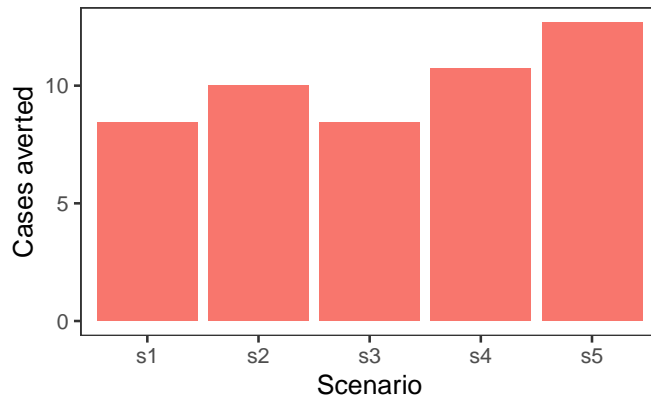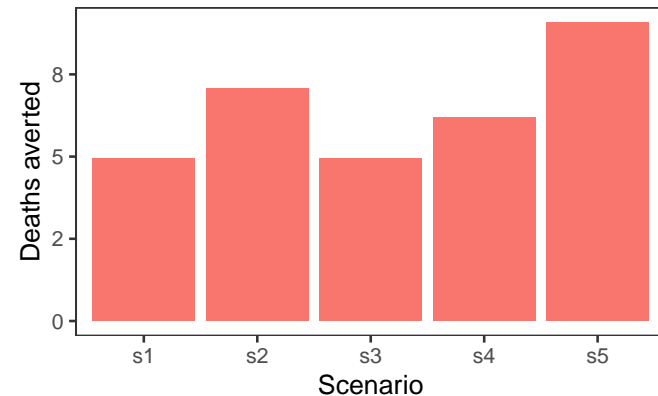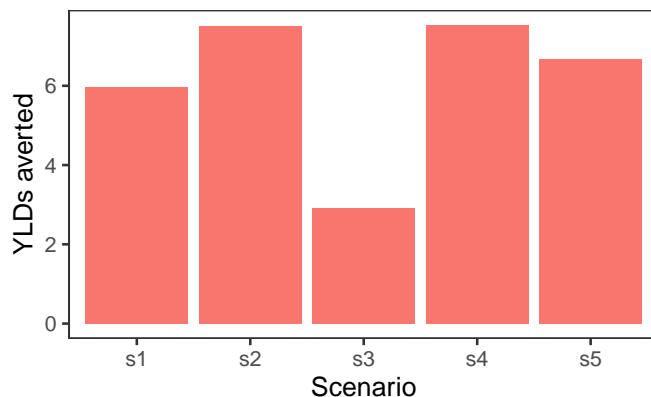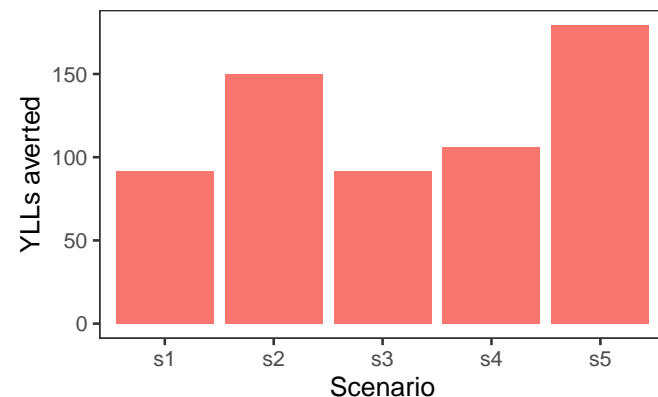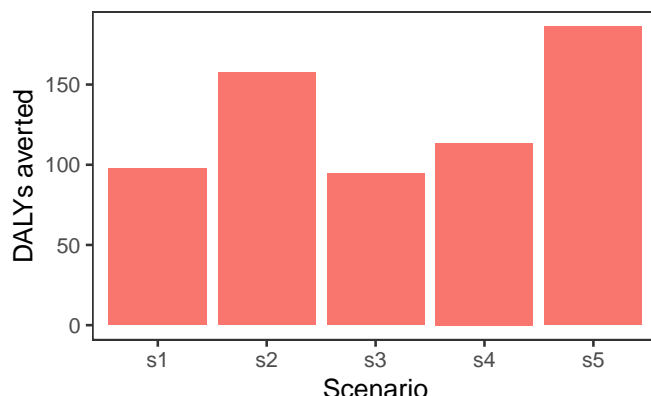

# Lifetime health impact per 1000 vaccinated girls – African Region (vaccination age = 12 years / bivalent/quadrivalent vaccine)

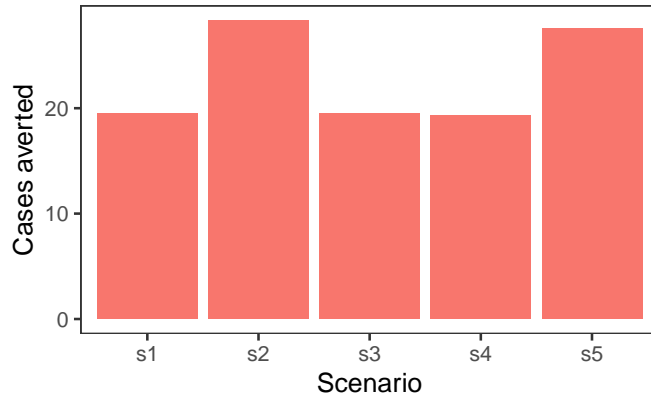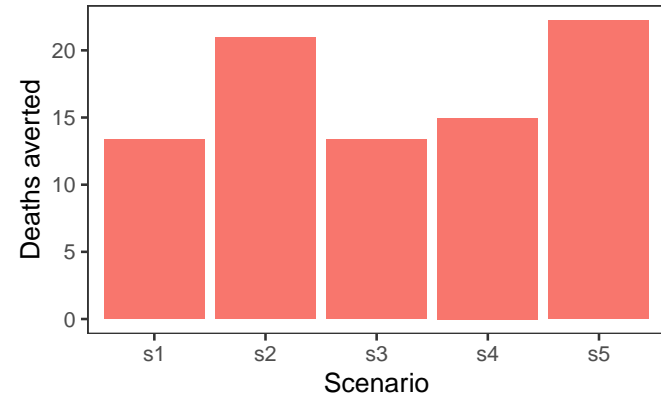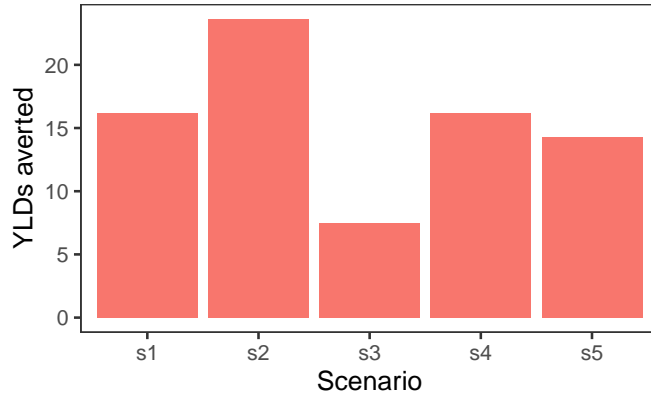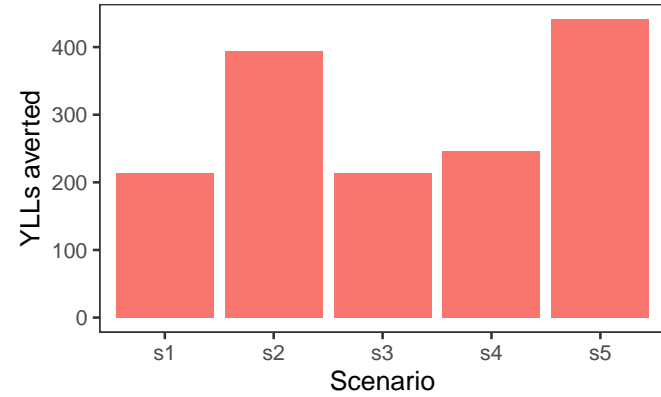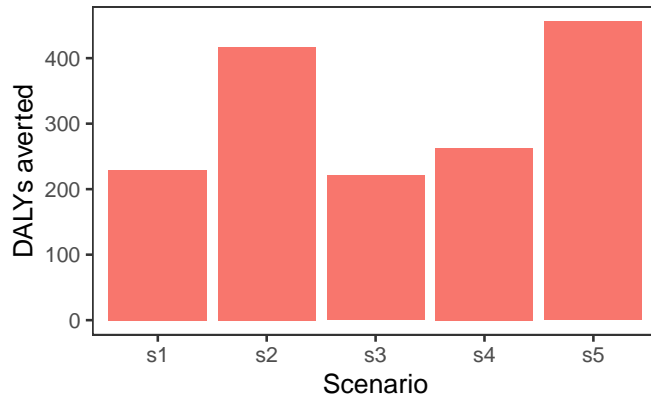

# Lifetime health impact per 1000 vaccinated girls – Region of the Americas (vaccination age = 12 years / bivalent/quadrivalent vaccine)

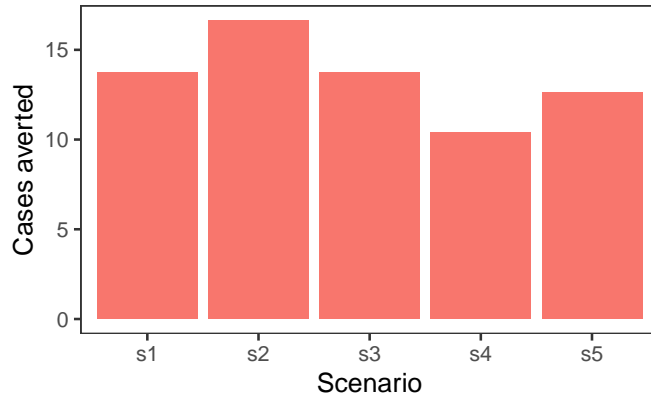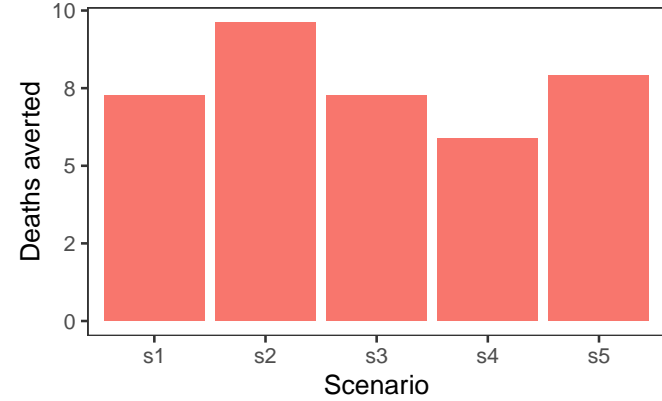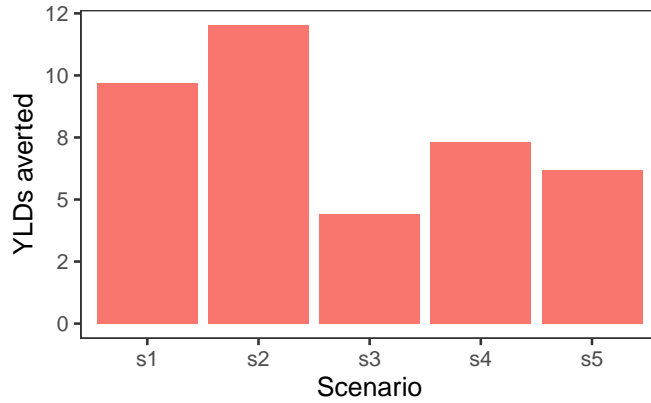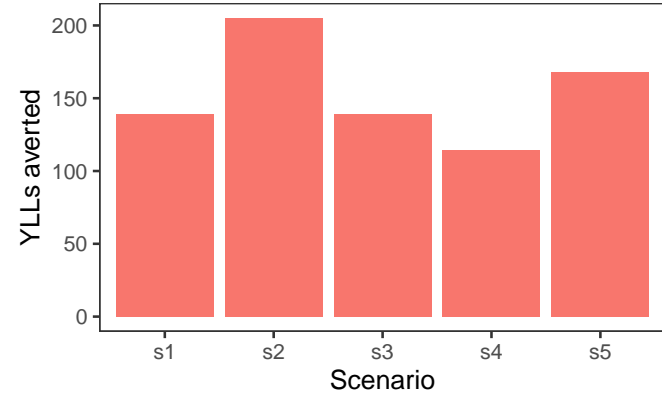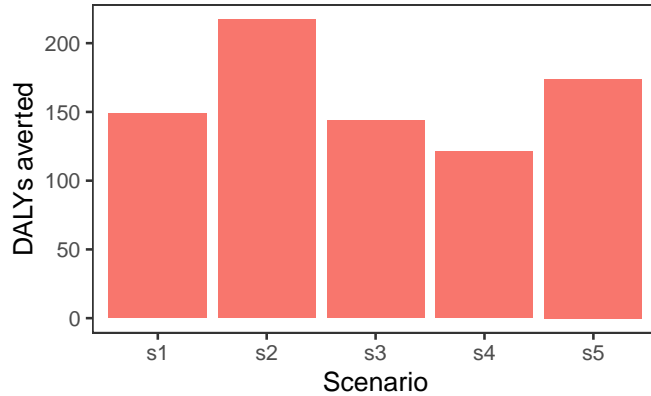

# Lifetime health impact per 1000 vaccinated girls – Eastern Mediterranean Region (vaccination age = 12 years / bivalent/quadrivalent vaccine)

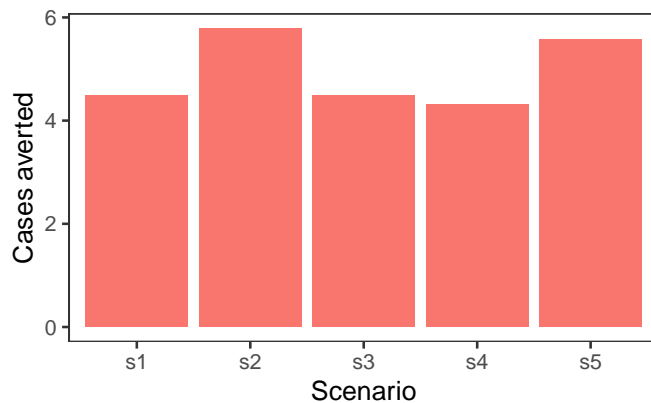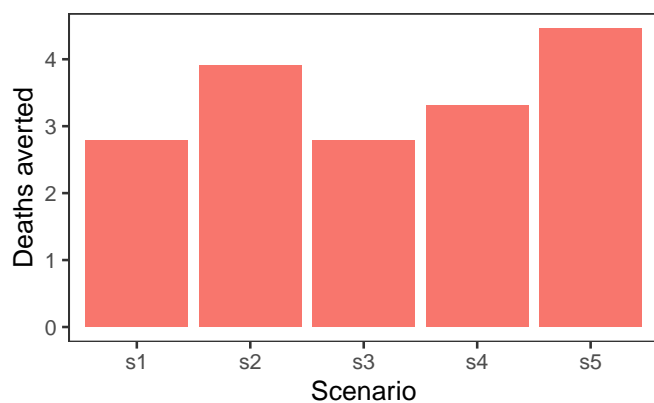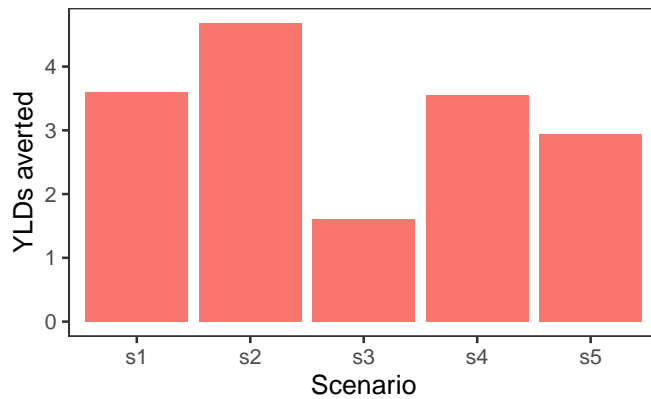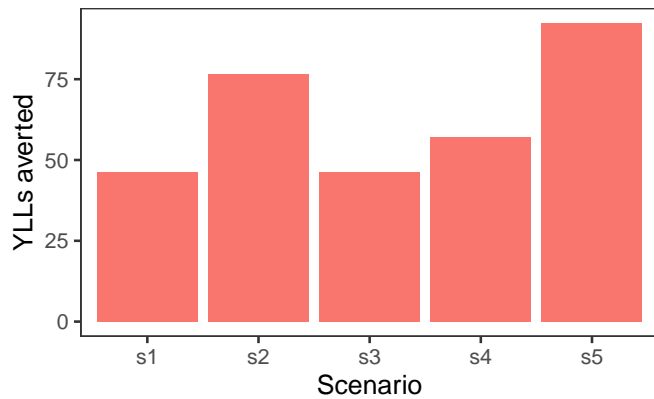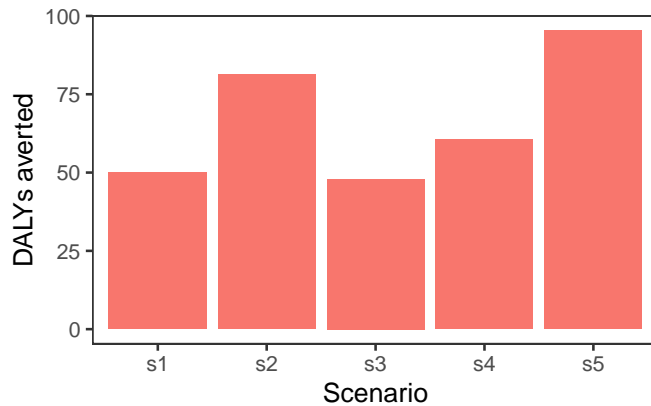

# Lifetime health impact per 1000 vaccinated girls – European Region (vaccination age = 12 years / bivalent/quadrivalent vaccine)

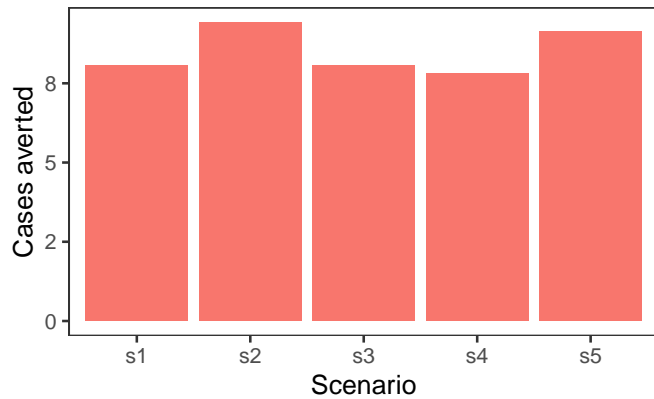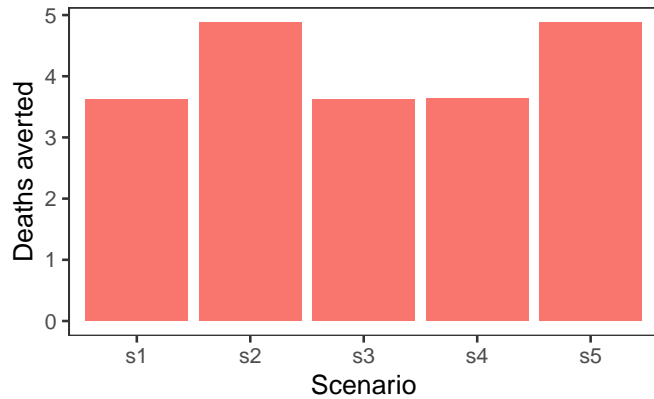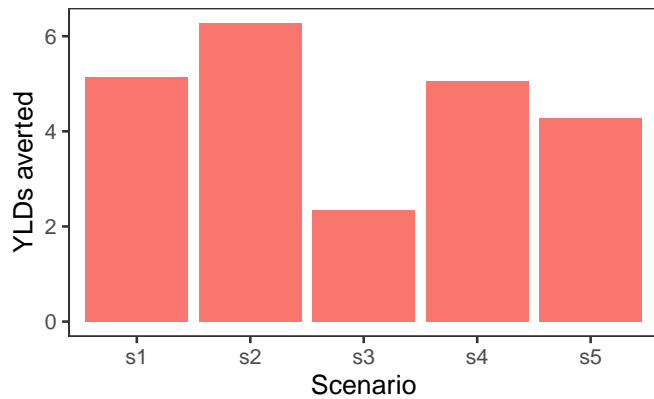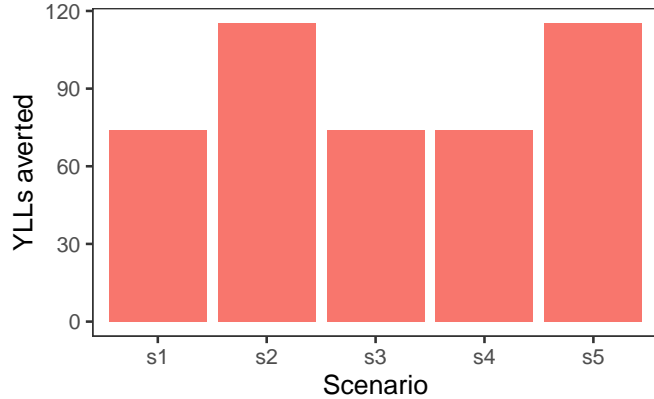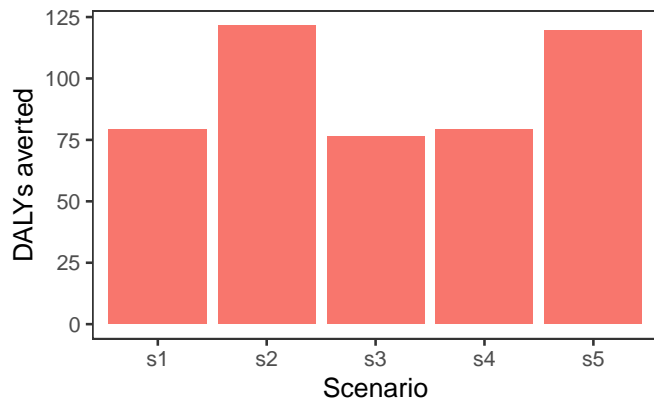

# Lifetime health impact per 1000 vaccinated girls – South-East Asia Region (vaccination age = 12 years / bivalent/quadrivalent vaccine)

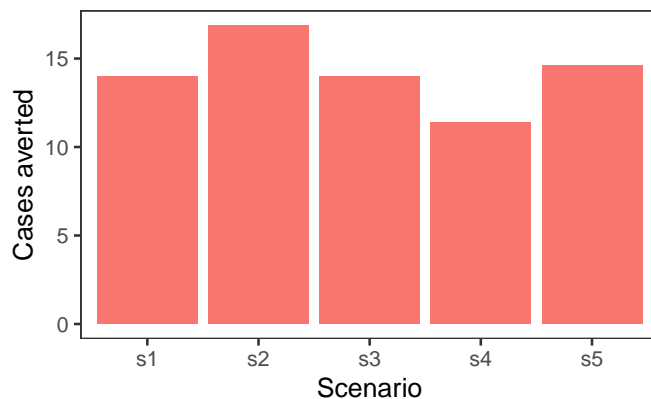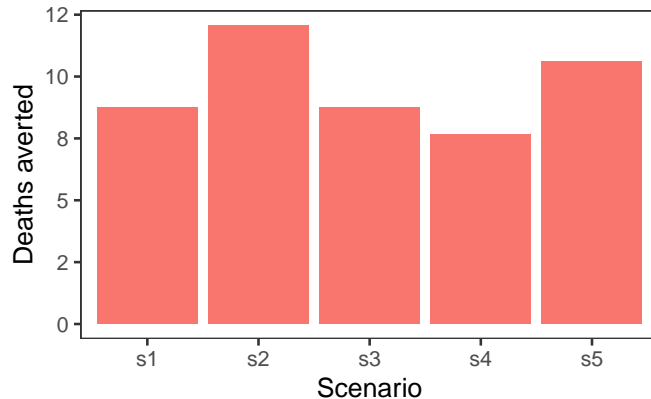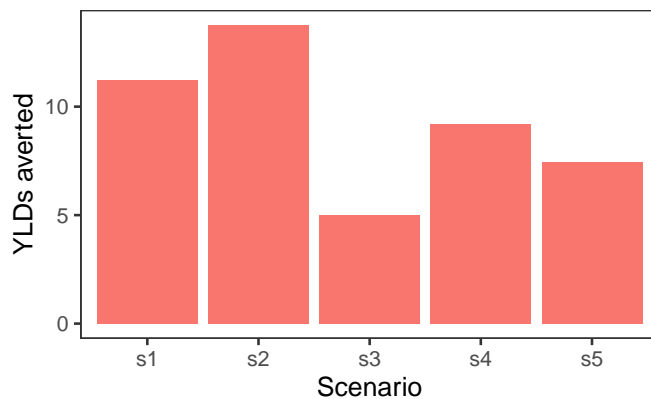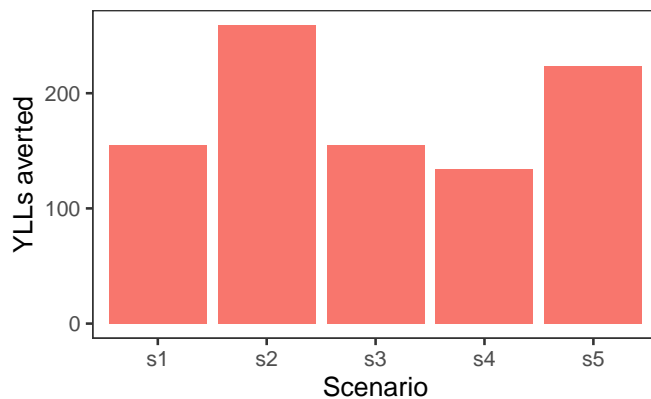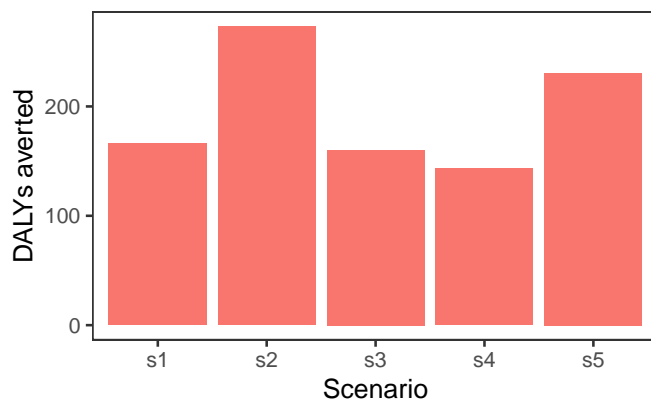

# Lifetime health impact per 1000 vaccinated girls – Western Pacific Region (vaccination age = 12 years / bivalent/quadrivalent vaccine)

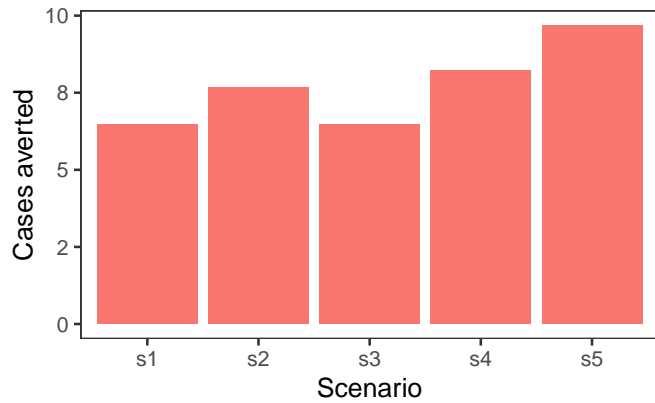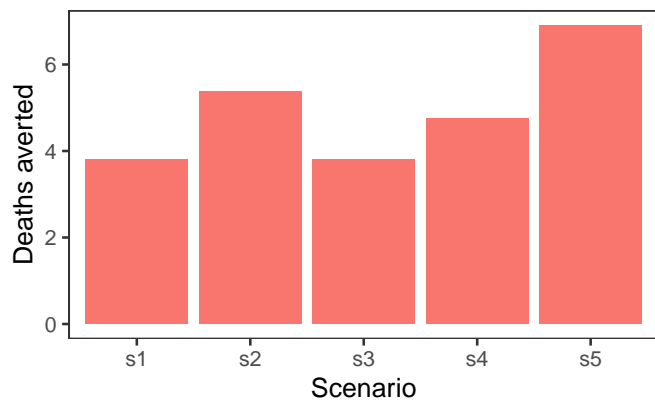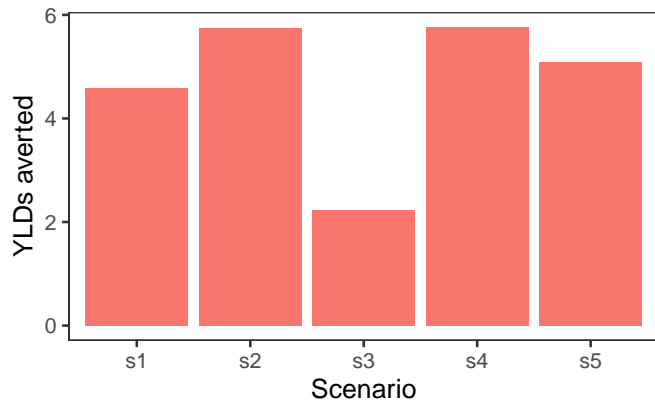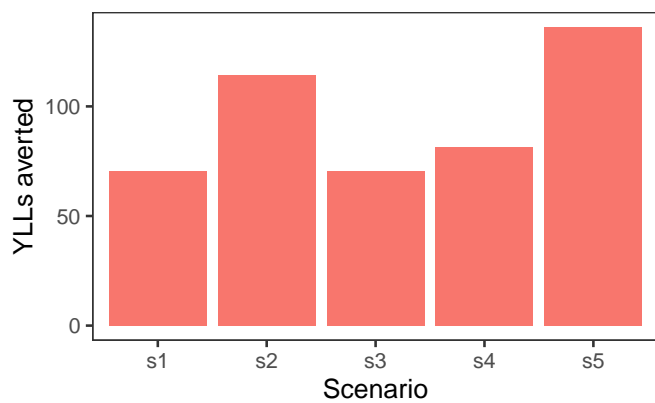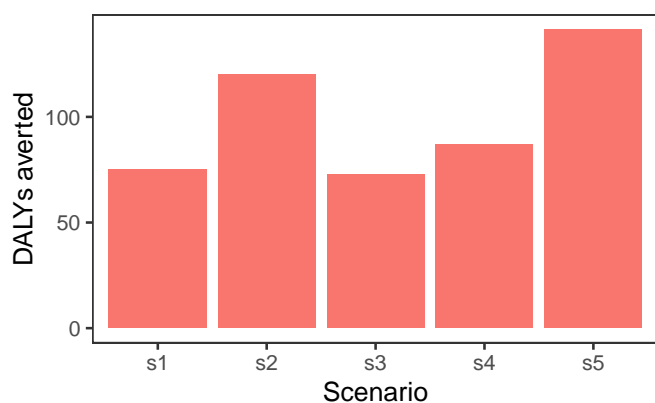



# Lifetime health impact per 1000 vaccinated girls – African Region (vaccination age = 12 years / nonavalent vaccine)

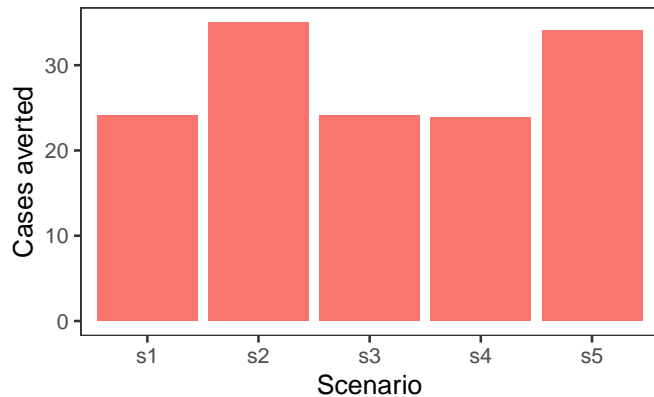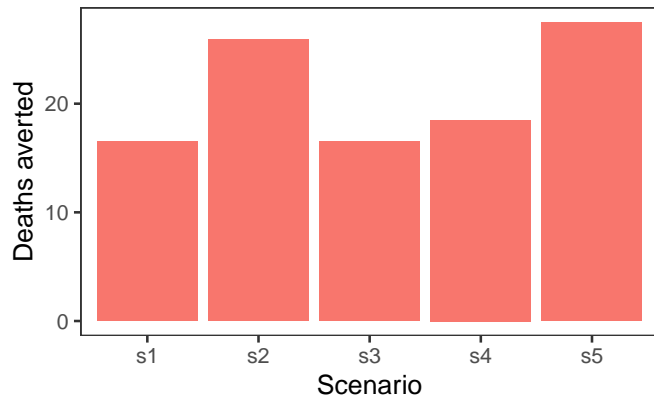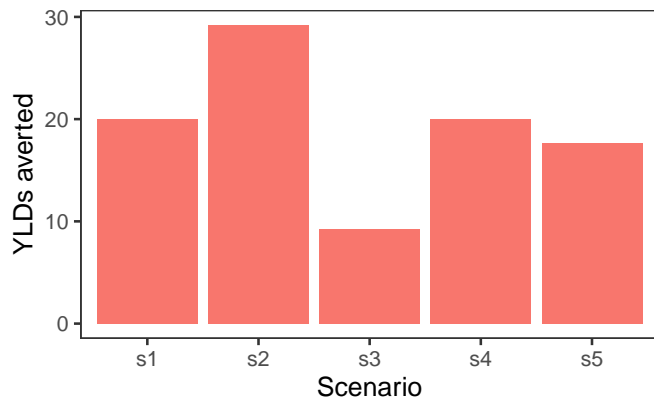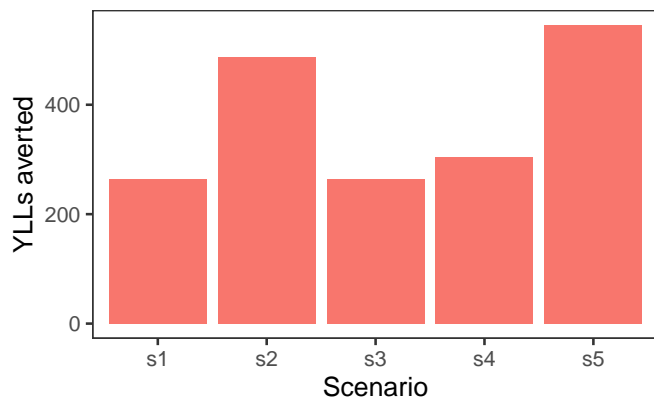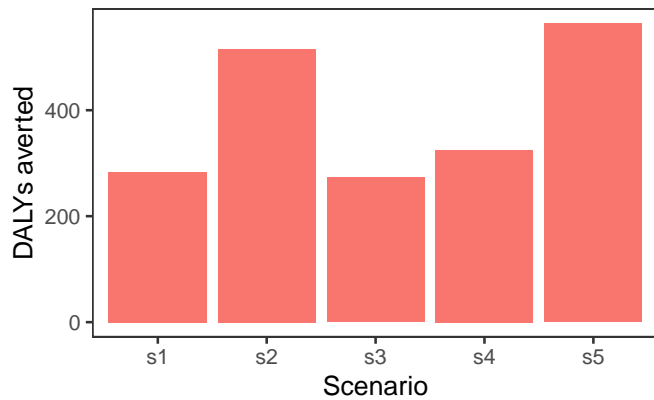

# Lifetime health impact per 1000 vaccinated girls – Region of the Americas (vaccination age = 12 years / nonavalent vaccine)

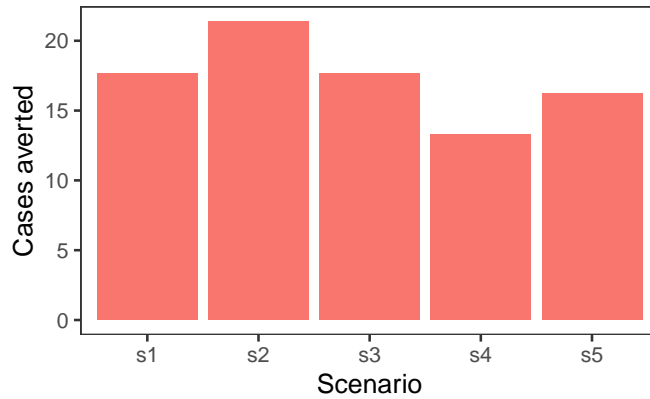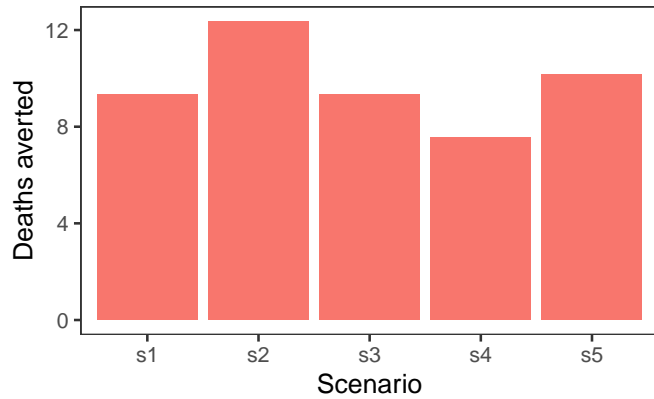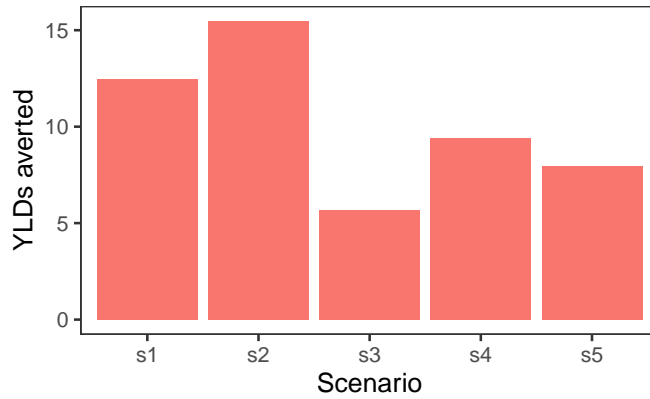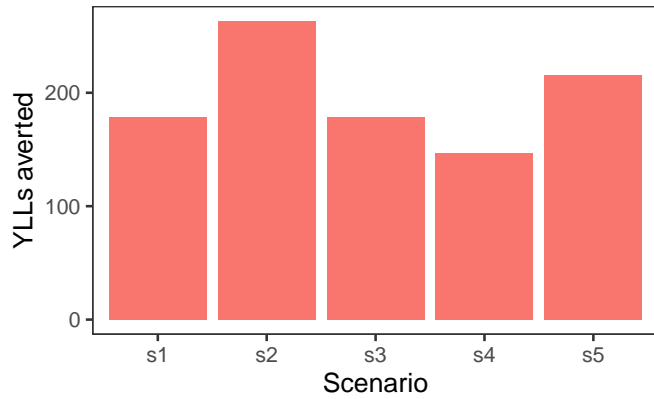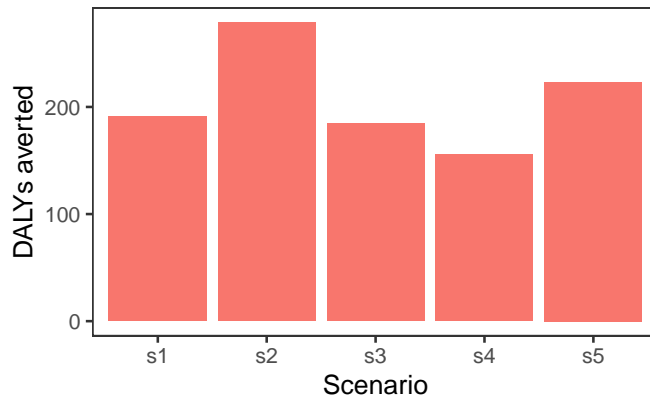

# Lifetime health impact per 1000 vaccinated girls – Eastern Mediterranean Region (vaccination age = 12 years / nonavalent vaccine)

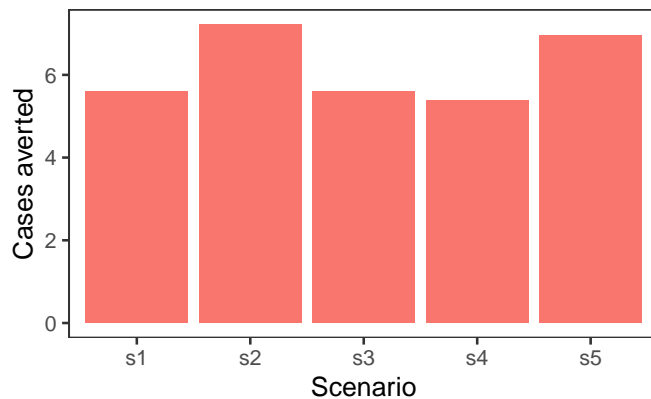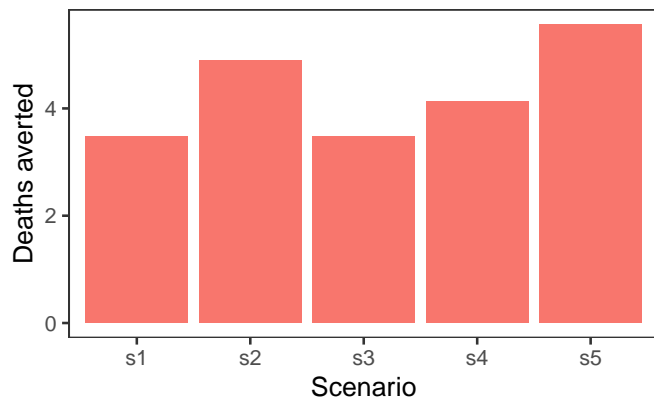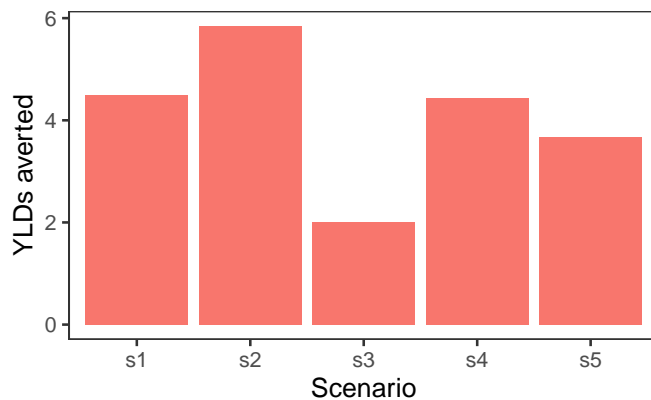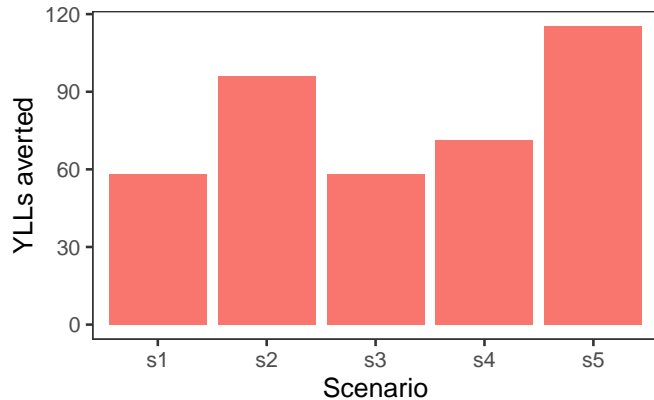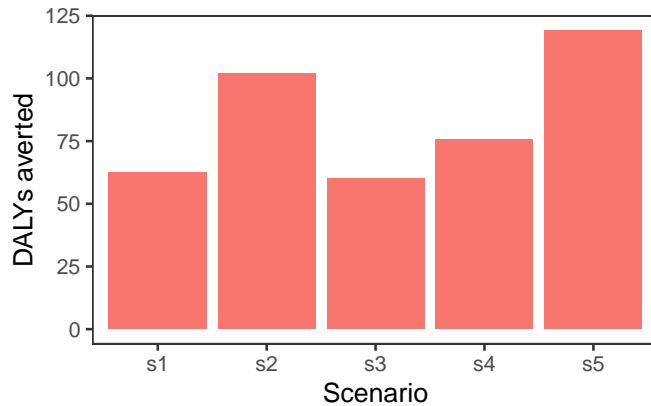

# Lifetime health impact per 1000 vaccinated girls – European Region (vaccination age = 12 years / nonavalent vaccine)

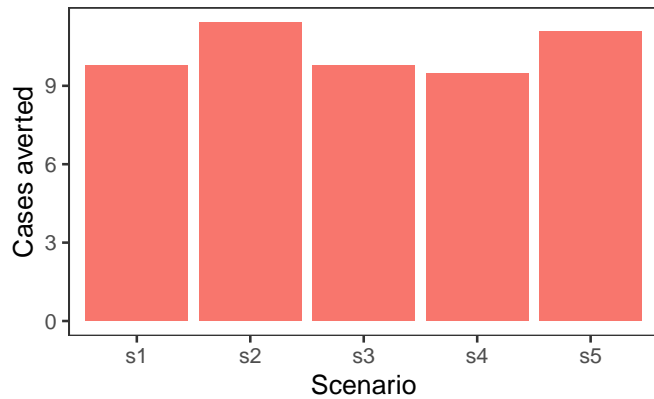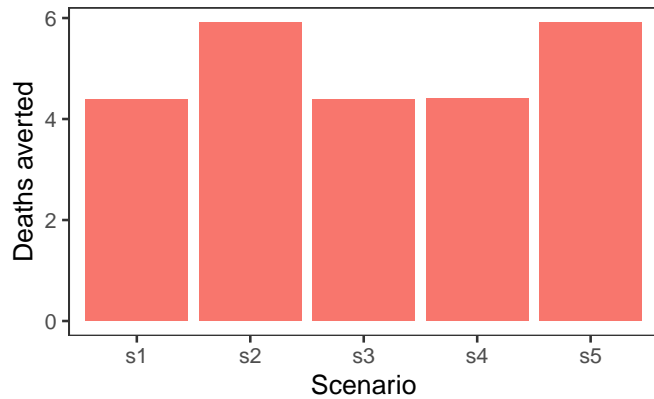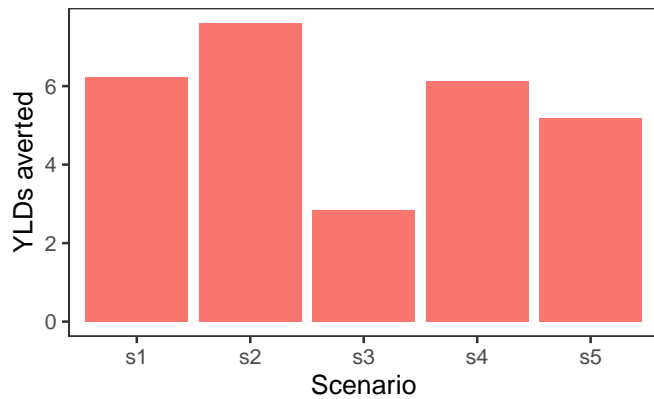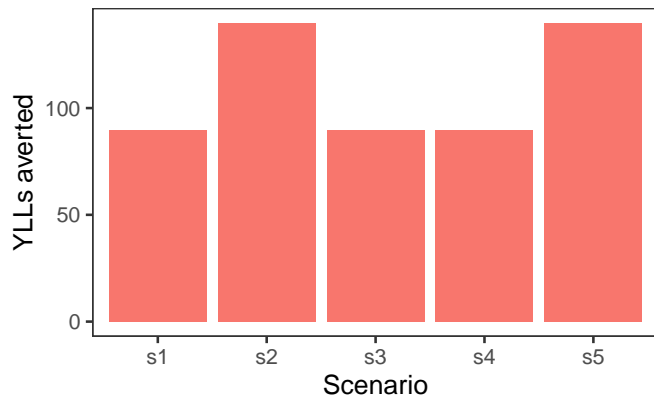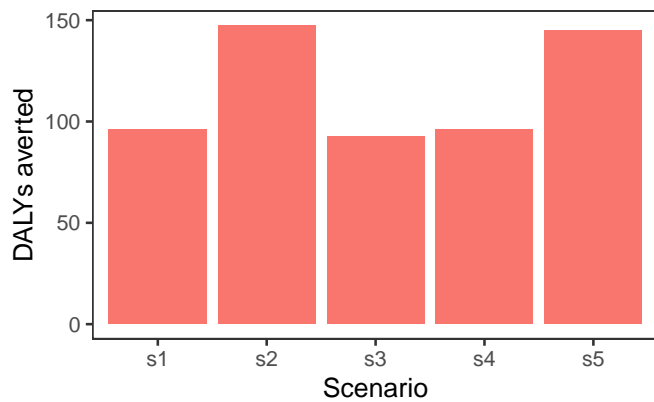

# Lifetime health impact per 1000 vaccinated girls – South–East Asia Region (vaccination age = 12 years / nonavalent vaccine)

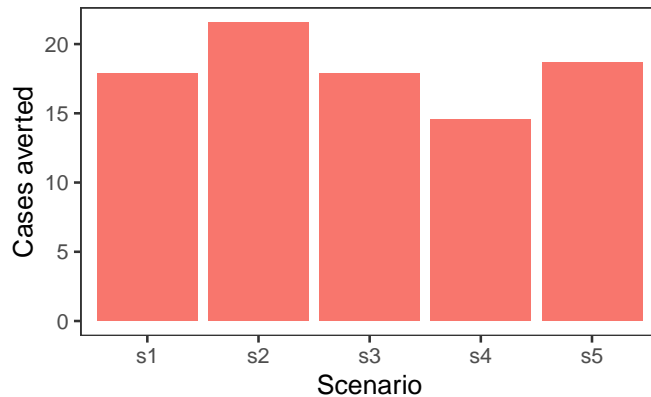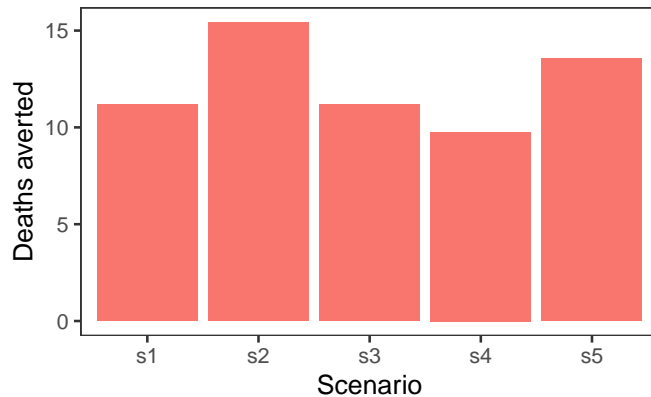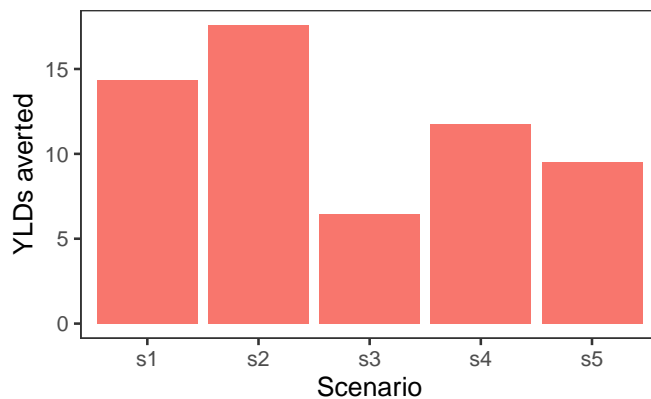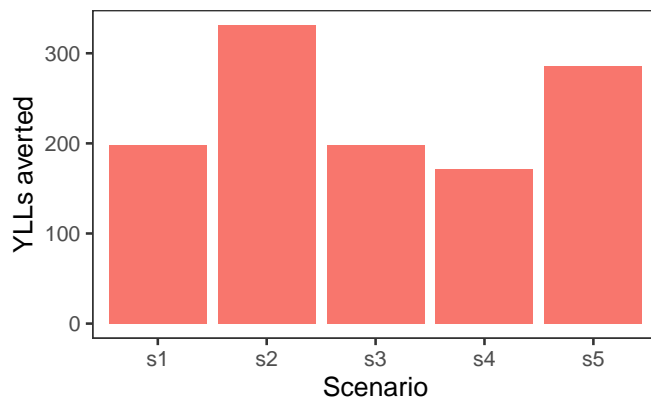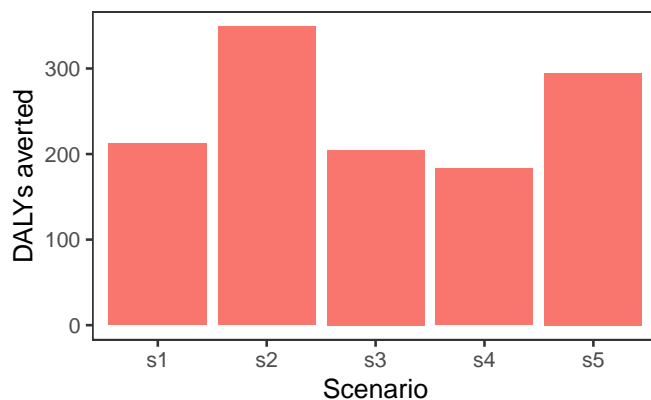

# Lifetime health impact per 1000 vaccinated girls – Western Pacific Region (vaccination age = 12 years / nonavalent vaccine)

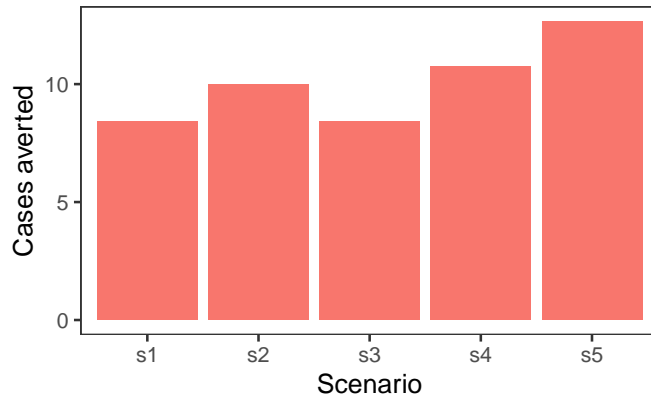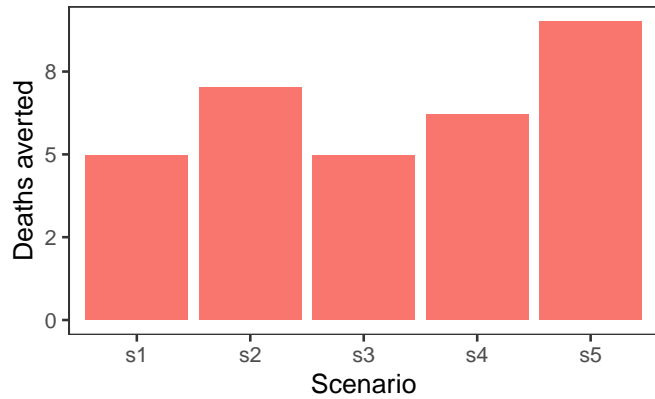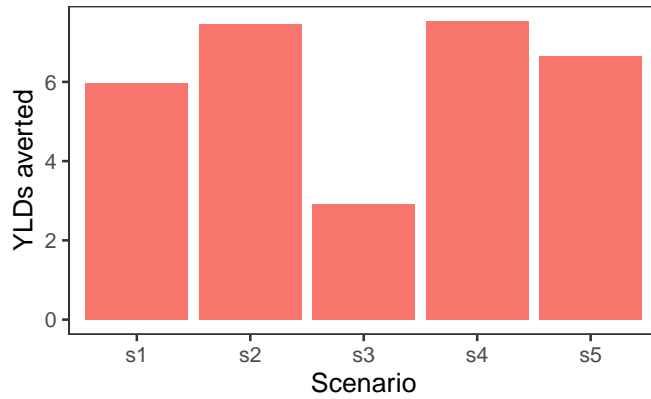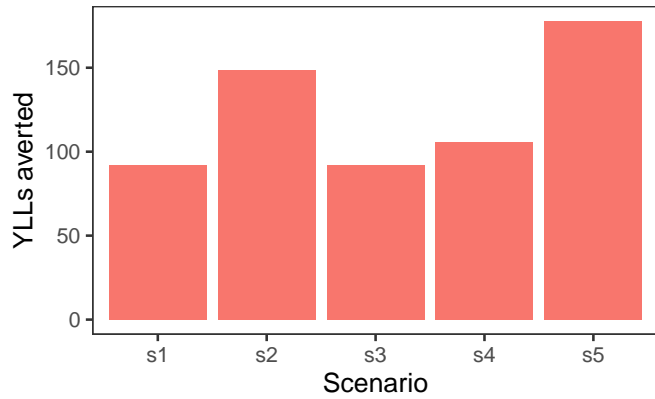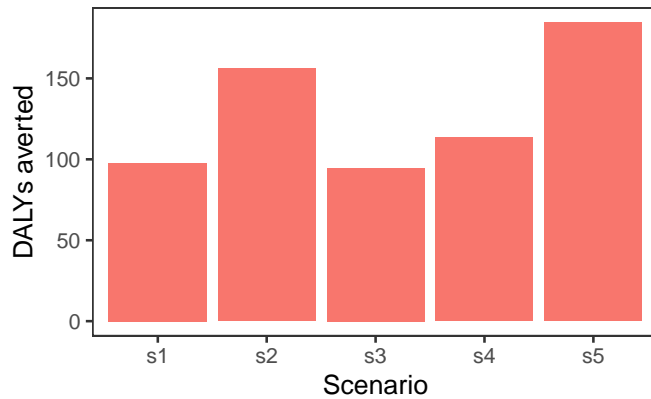

#### A14. HPV vaccination impact of 12-year-old girls at the national level

Lifetime health impact of bivalent/quadrivalent and nonavalent HPV vaccination of 12-year-old girls during 2020-2029 on cases, deaths and DALYs averted per 1000 vaccinated girls in 177 countries (estimates after the combined PRIME updates for demography, disability weights and cervical cancer burden).

Lifetime health impact of bivalent/quadrivalent HPV vaccination of 12-year-old girls  
Cases averted per 1000 vaccinated girls

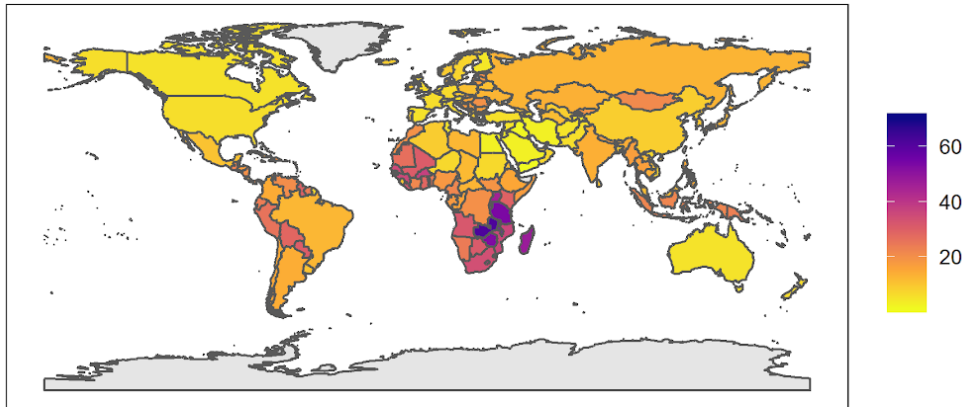

Deaths averted per 1000 vaccinated girls

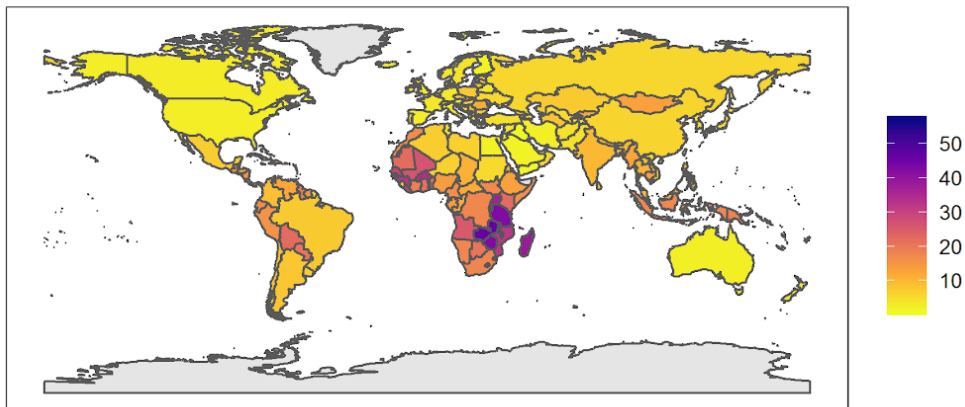

DALYs averted per 1000 vaccinated girls

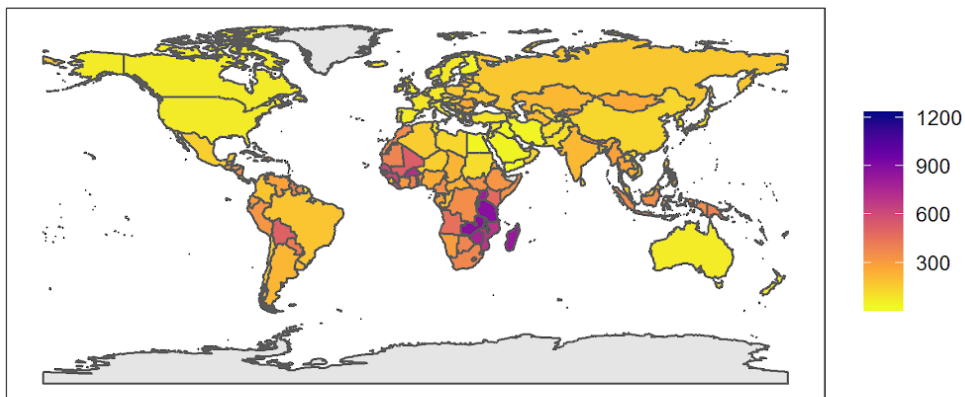

Lifetime health impact of nonavalent HPV vaccination of 12-year-old girls  
Cases averted per 1000 vaccinated girls

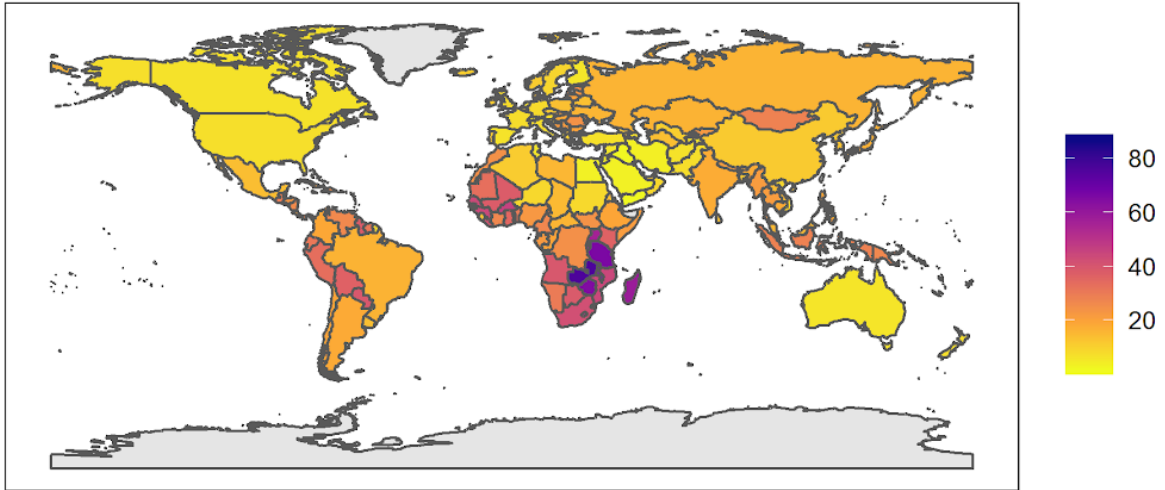

Deaths averted per 1000 vaccinated girls

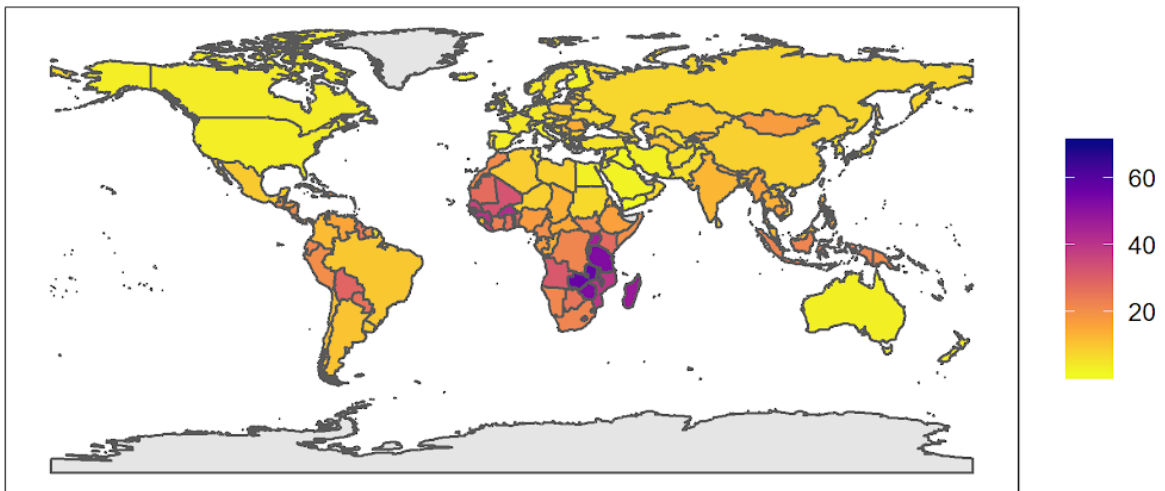

DALYs averted per 1000 vaccinated girls

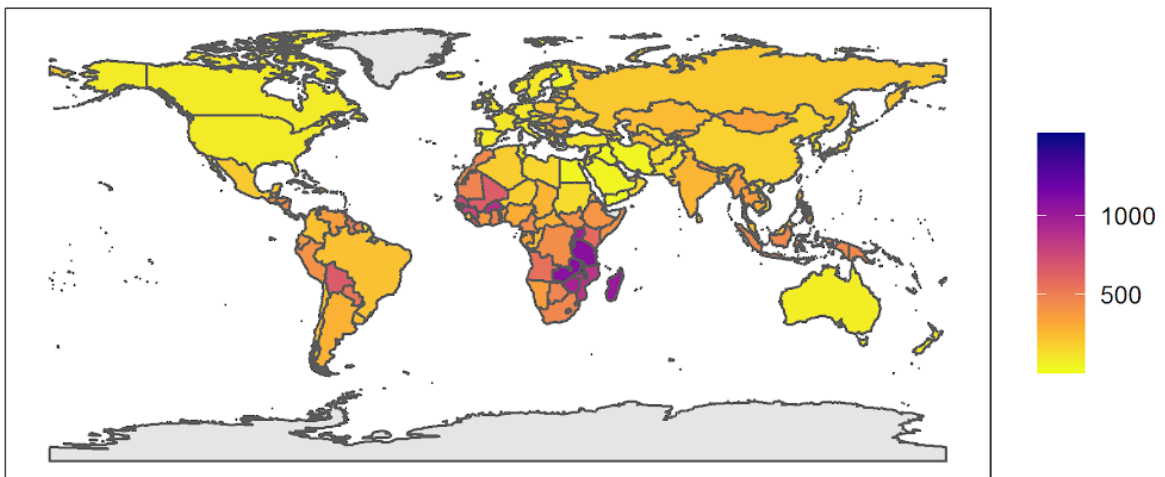



### **A15. National estimates of HPV vaccination impact for comparative scenarios**

Lifetime health impact of HPV vaccination on cases, deaths, YLDs, YLLs and DALYs averted per 1000 vaccinated girls in 177 countries for the 5 comparative scenarios for bivalent/quadrivalent and nonavalent vaccination of 9-year-old and 12-year-old girls.

### Cases averted per 1000 vaccinated girls

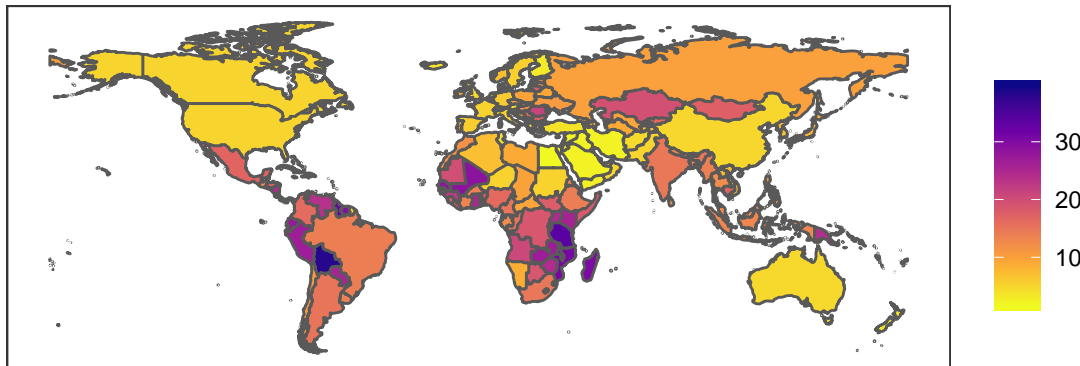

### Deaths averted per 1000 vaccinated girls

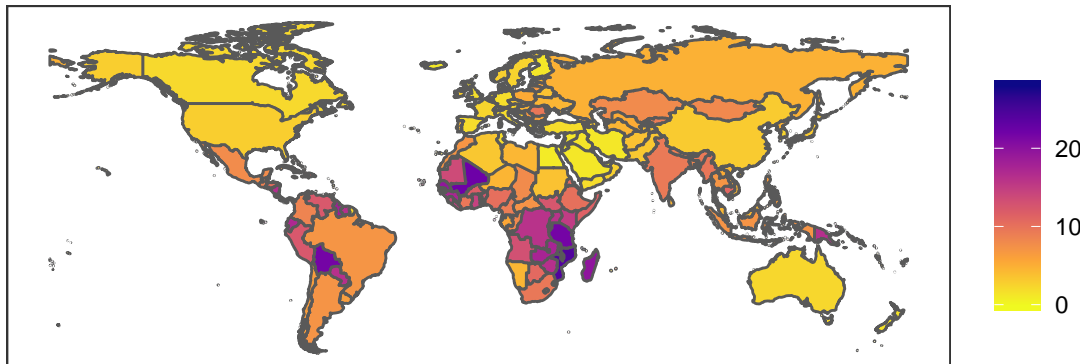

### DALYs averted per 1000 vaccinated girls

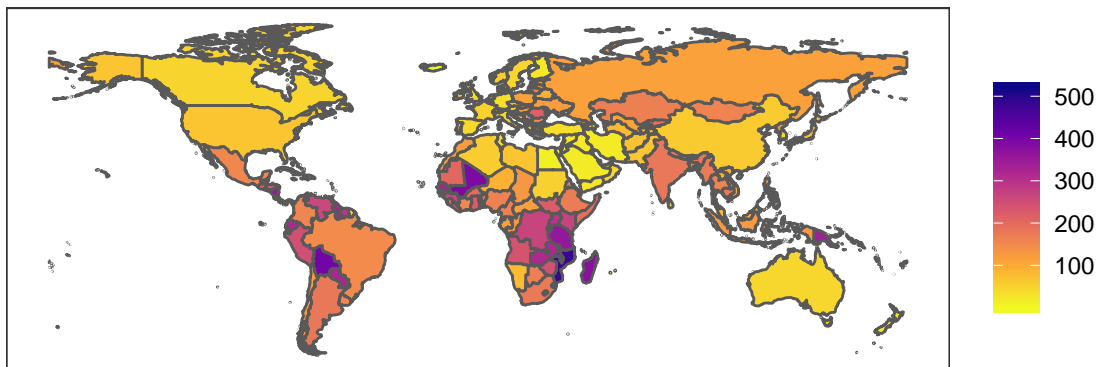

### YLDs averted per 1000 vaccinated girls

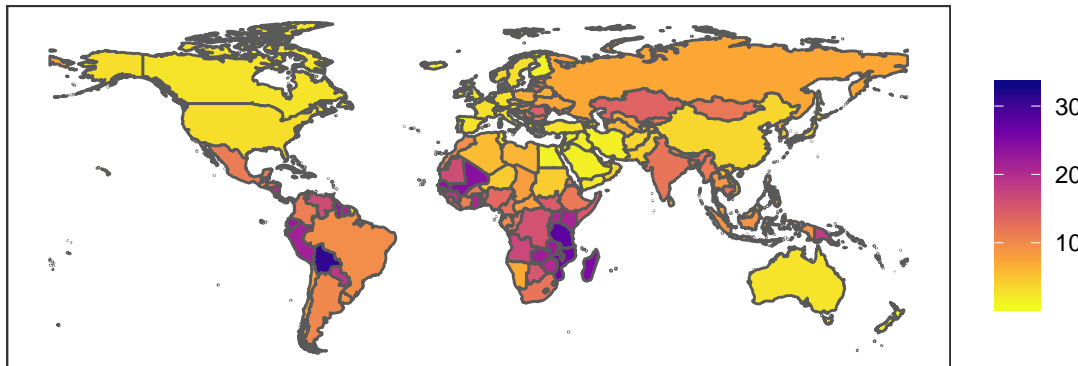

### YLLs averted per 1000 vaccinated girls

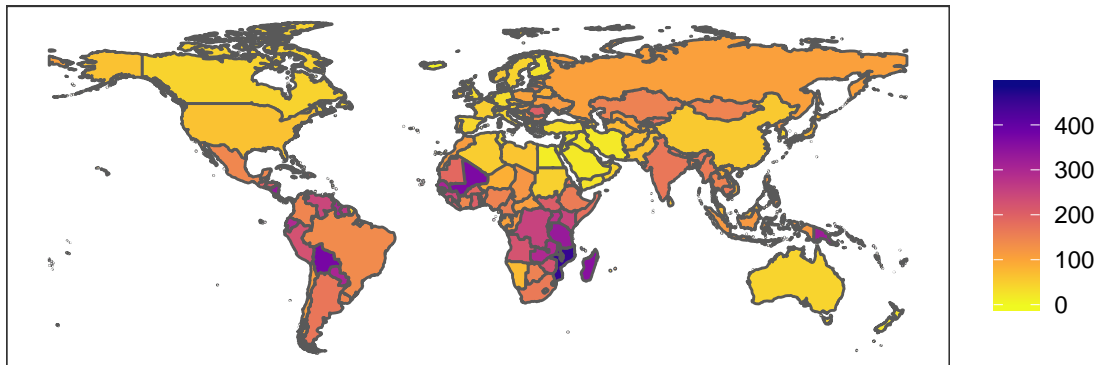

### DALYs averted per 1000 vaccinated girls

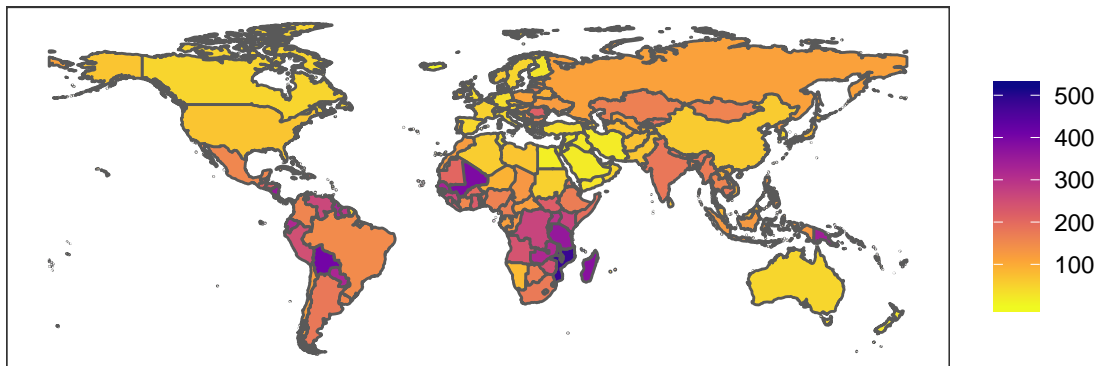

### Cases averted per 1000 vaccinated girls

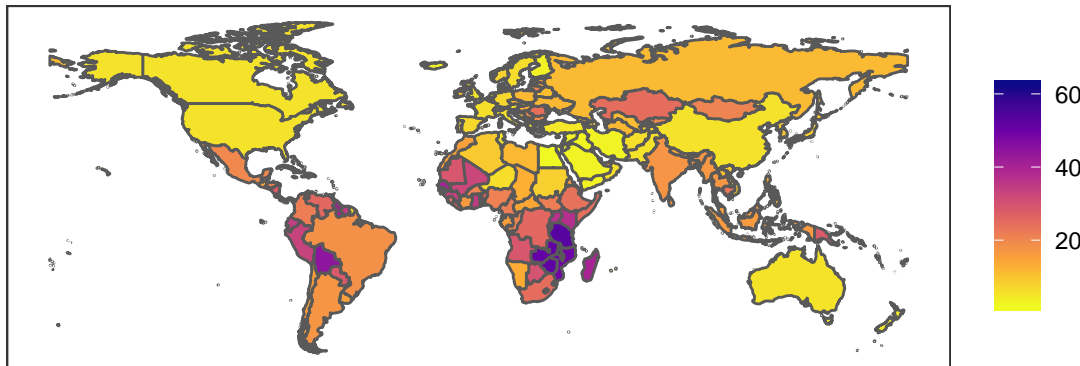

### Deaths averted per 1000 vaccinated girls

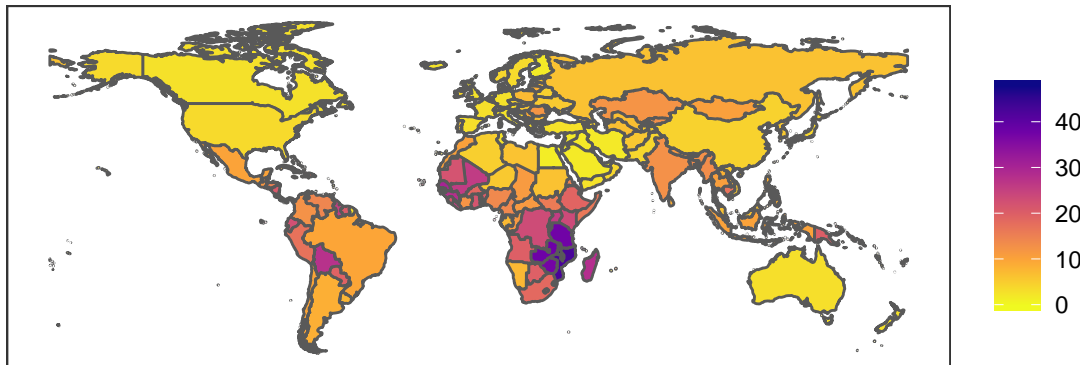

### DALYs averted per 1000 vaccinated girls

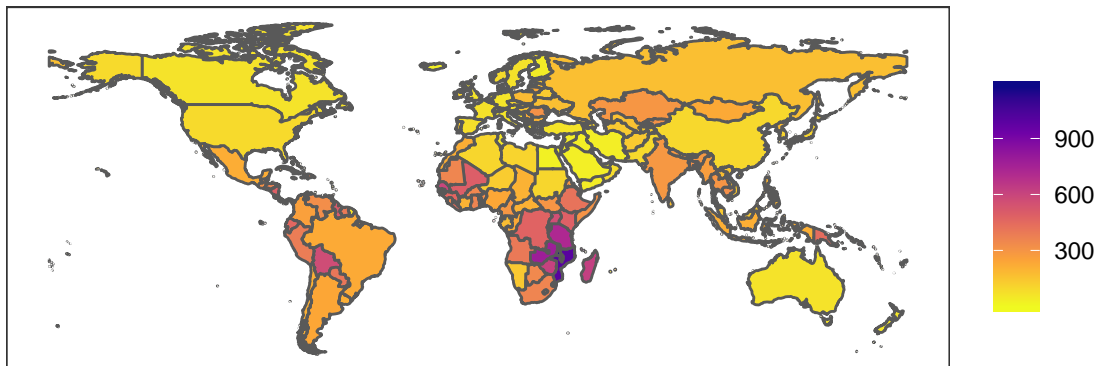

### YLDs averted per 1000 vaccinated girls

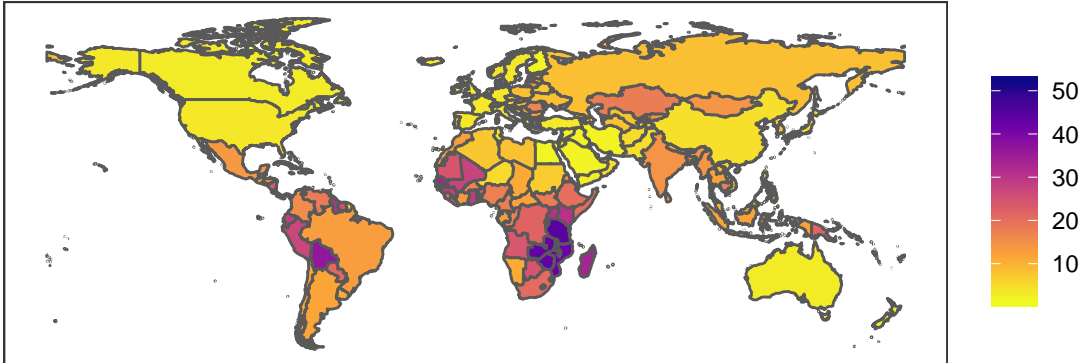

### YLLs averted per 1000 vaccinated girls

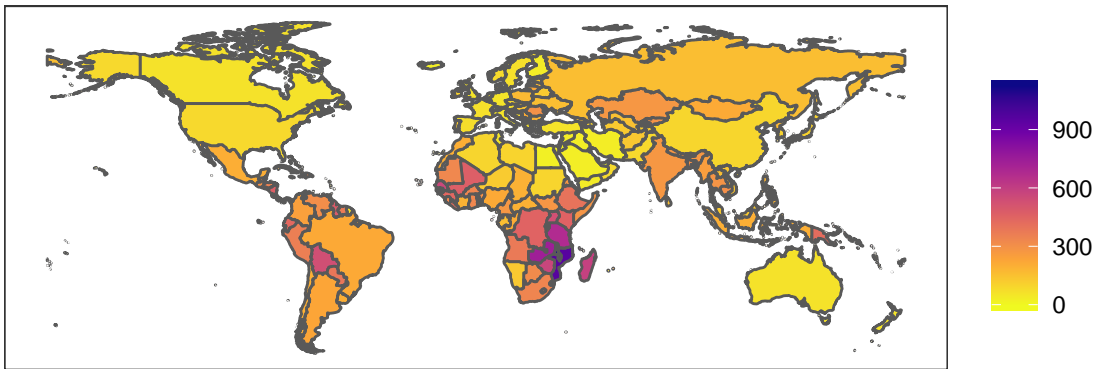

### DALYs averted per 1000 vaccinated girls

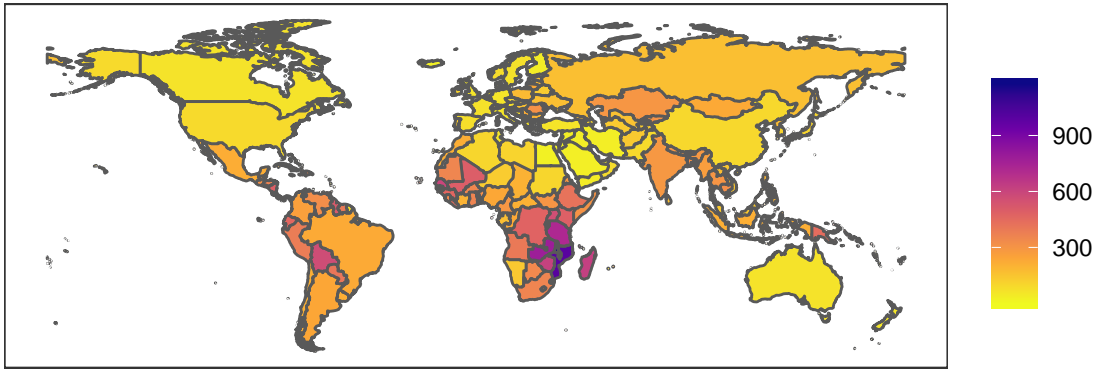

### Cases averted per 1000 vaccinated girls



### Deaths averted per 1000 vaccinated girls

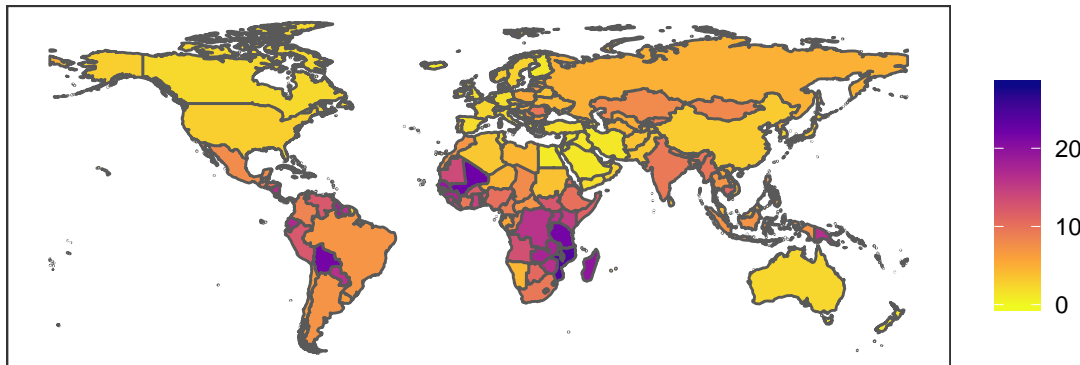

### DALYs averted per 1000 vaccinated girls

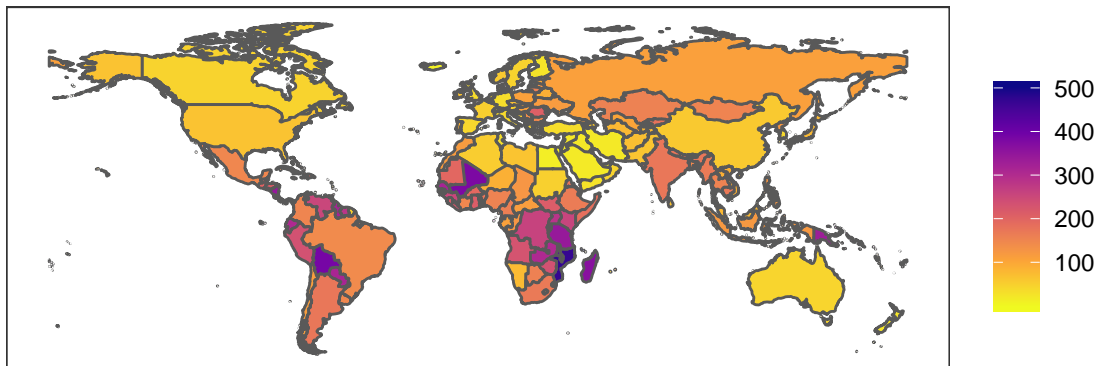

### YLDs averted per 1000 vaccinated girls

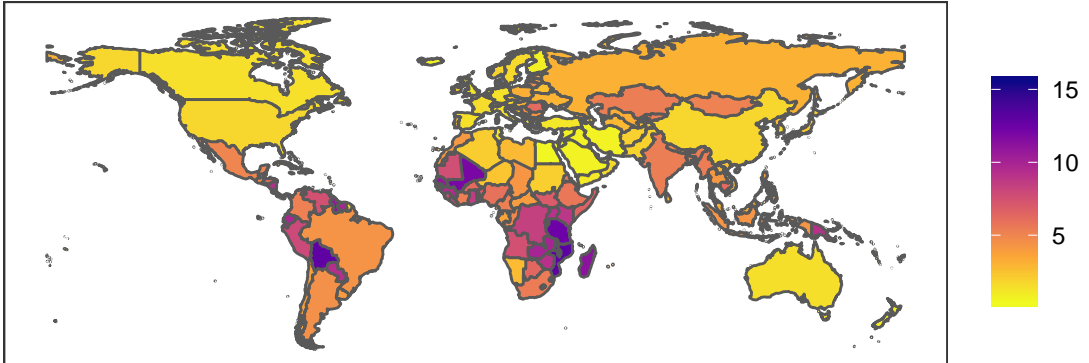

### YLLs averted per 1000 vaccinated girls

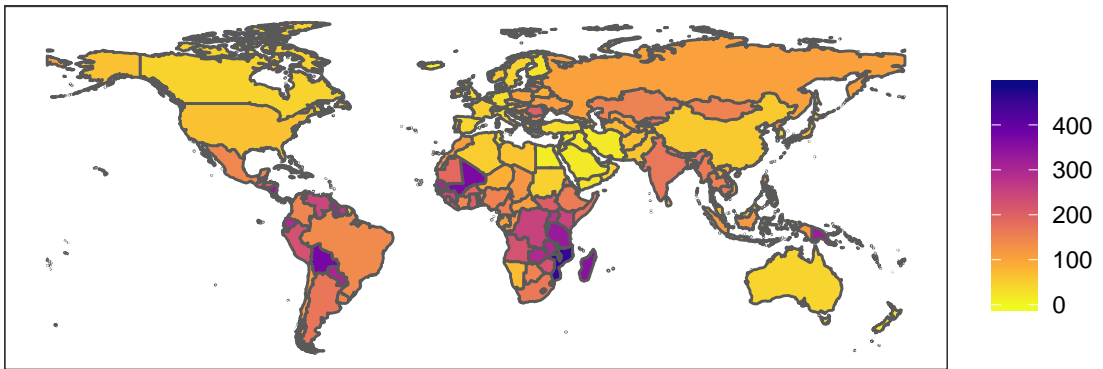

### DALYs averted per 1000 vaccinated girls

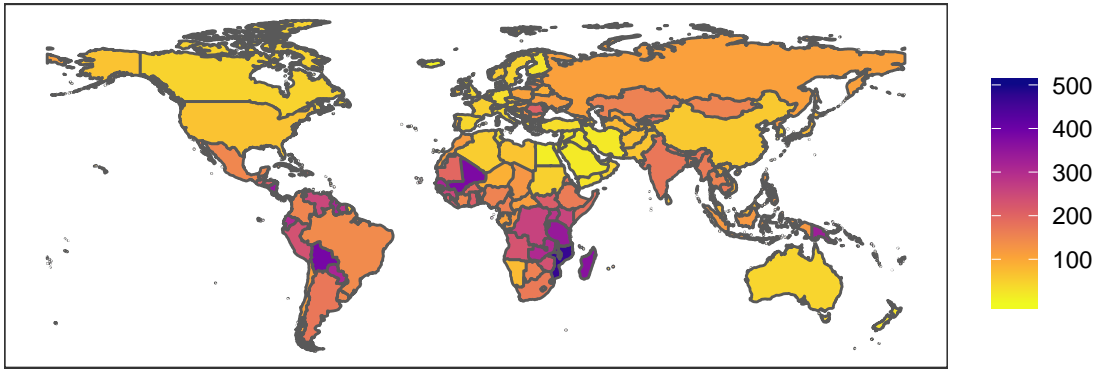

### Cases averted per 1000 vaccinated girls

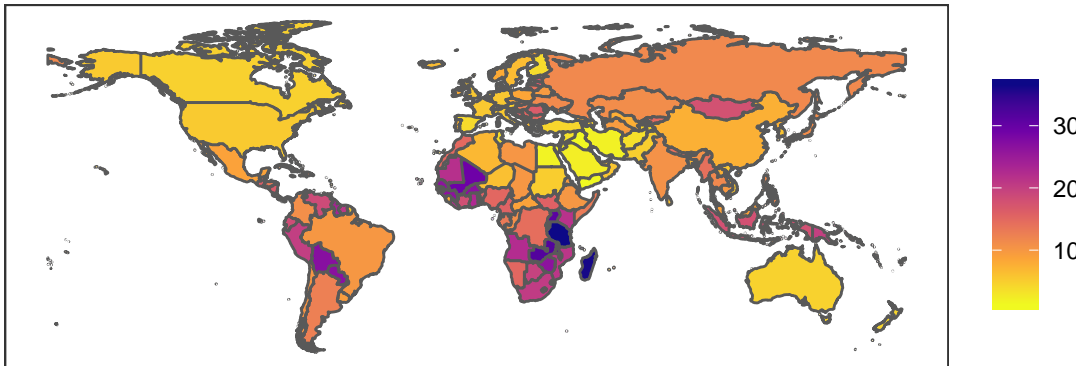

### Deaths averted per 1000 vaccinated girls

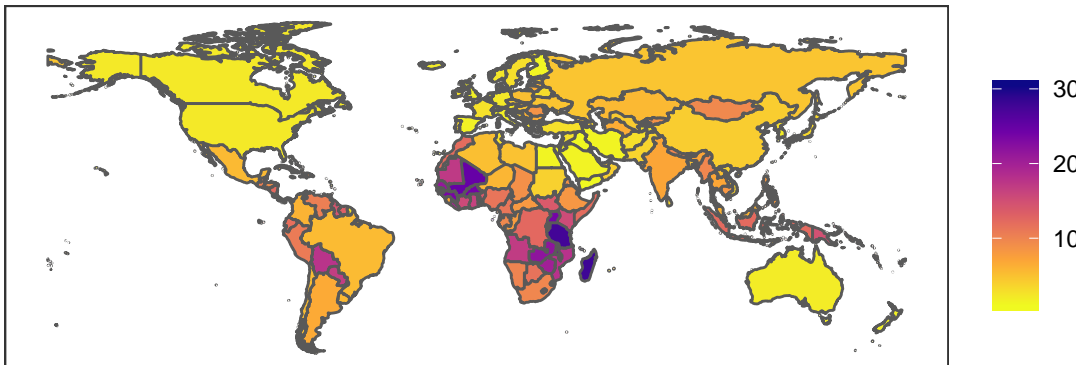

### DALYs averted per 1000 vaccinated girls

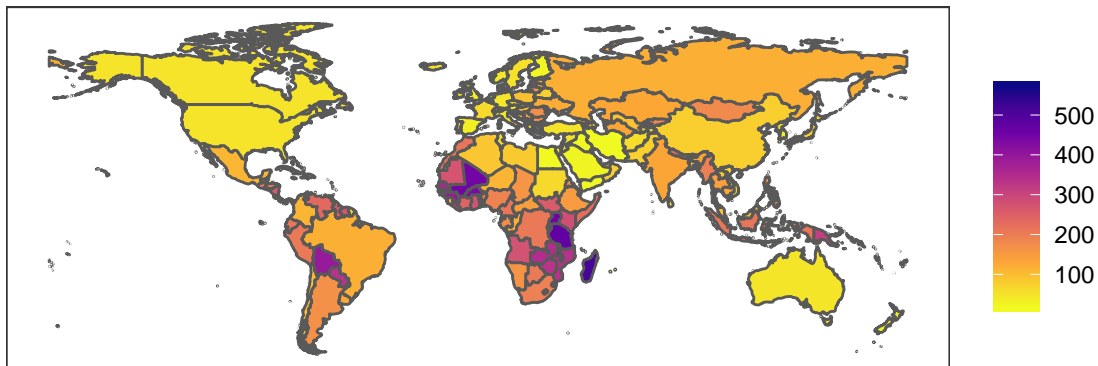



### YLDs averted per 1000 vaccinated girls

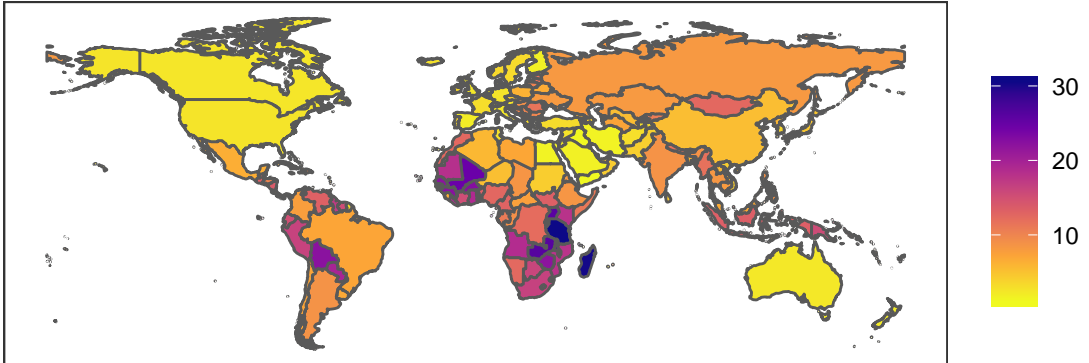

### YLLs averted per 1000 vaccinated girls

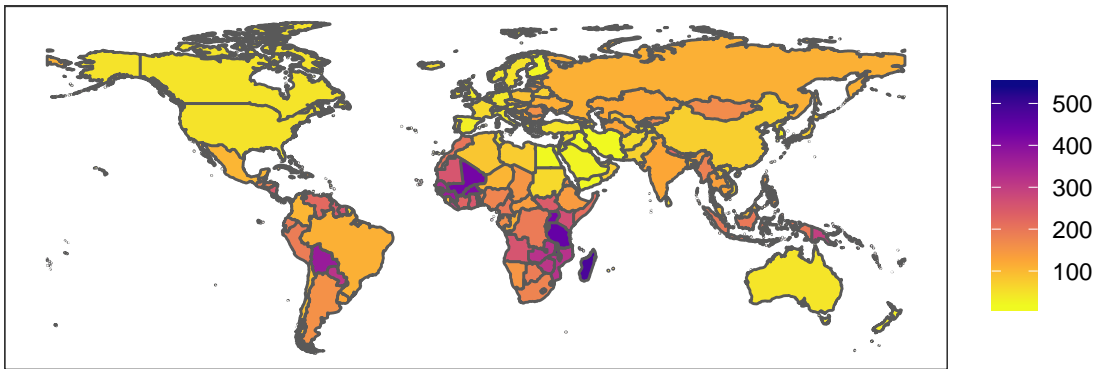

### DALYs averted per 1000 vaccinated girls

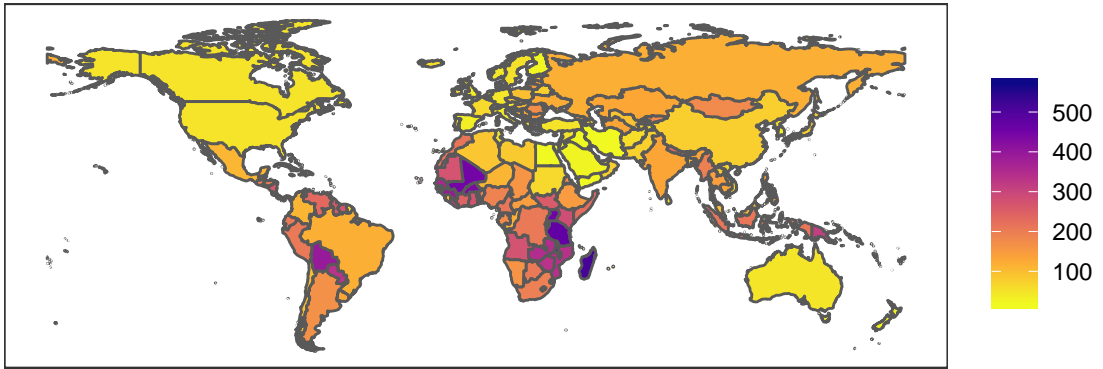

### Cases averted per 1000 vaccinated girls

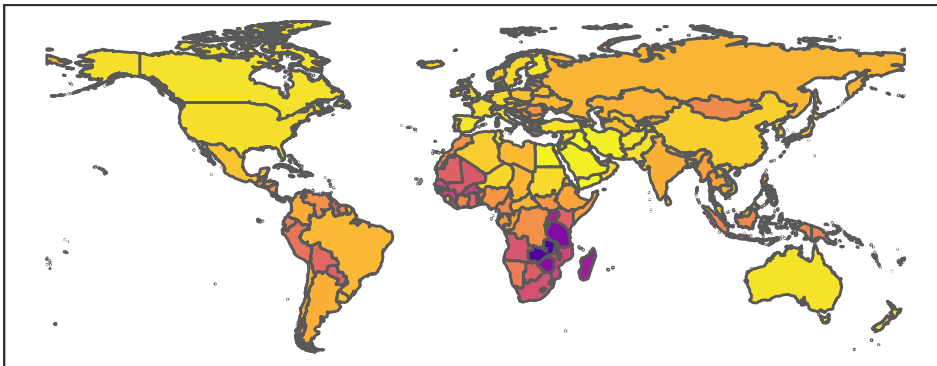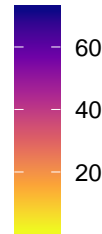

### Deaths averted per 1000 vaccinated girls

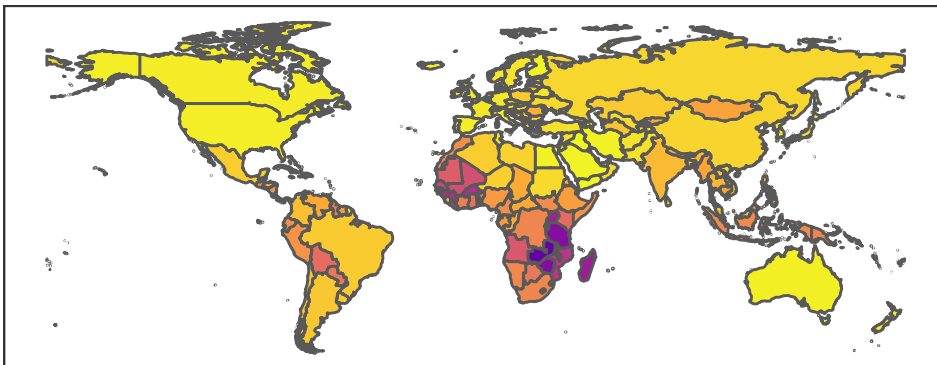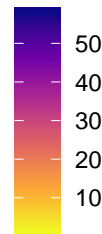

### DALYs averted per 1000 vaccinated girls

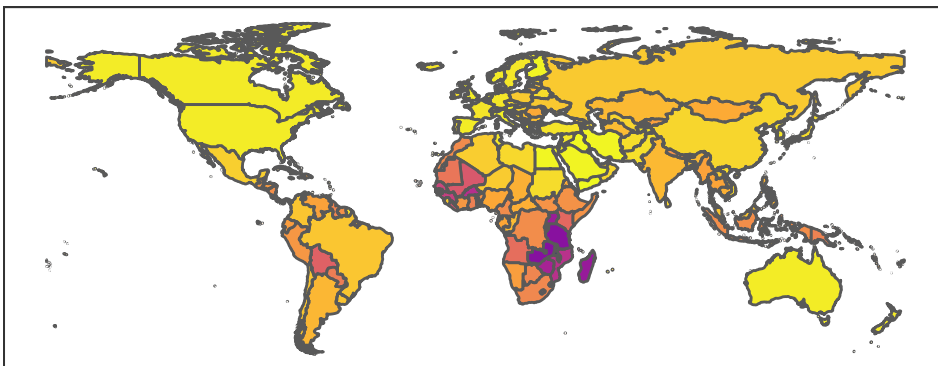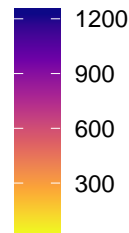

### YLDs averted per 1000 vaccinated girls

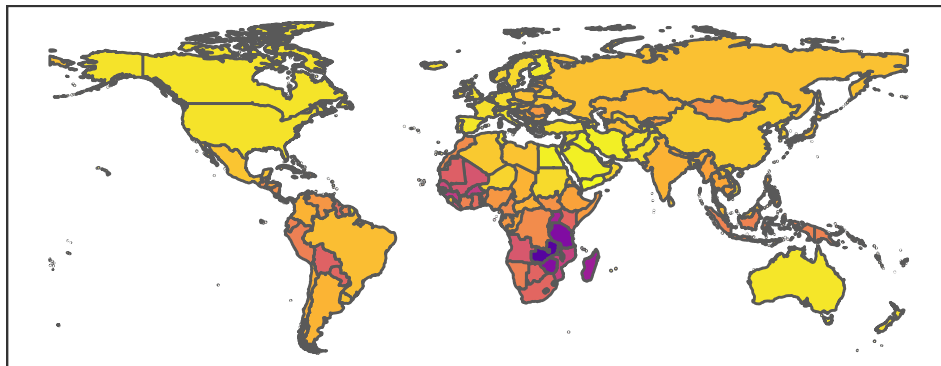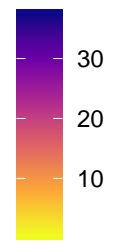

### YLLs averted per 1000 vaccinated girls

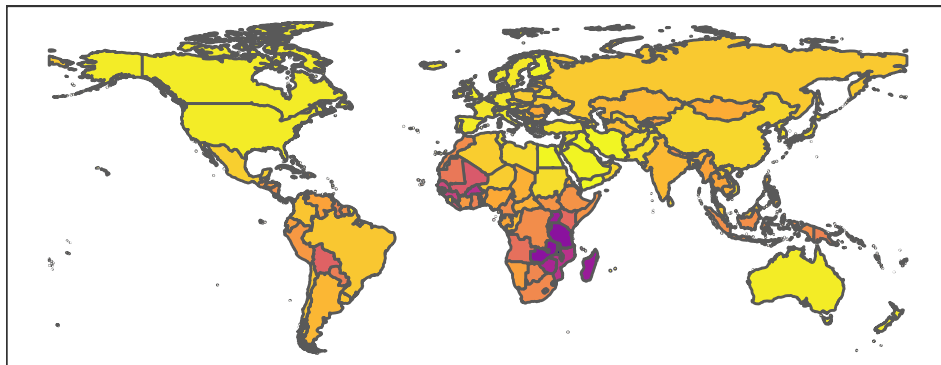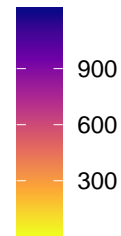

### DALYs averted per 1000 vaccinated girls

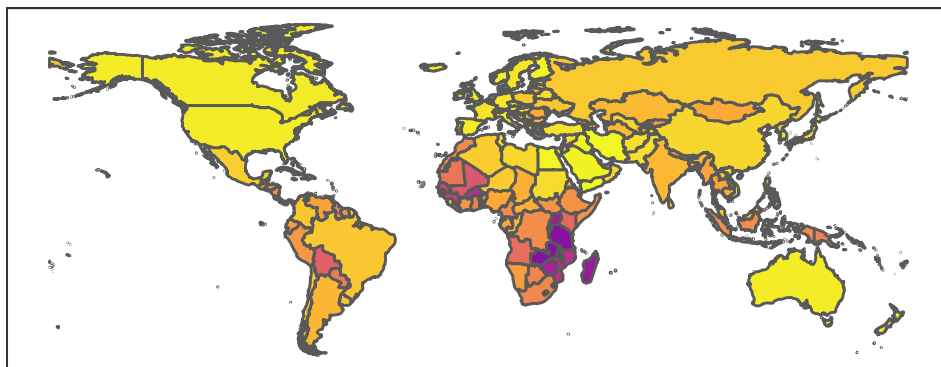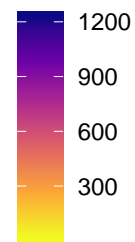

### Cases averted per 1000 vaccinated girls

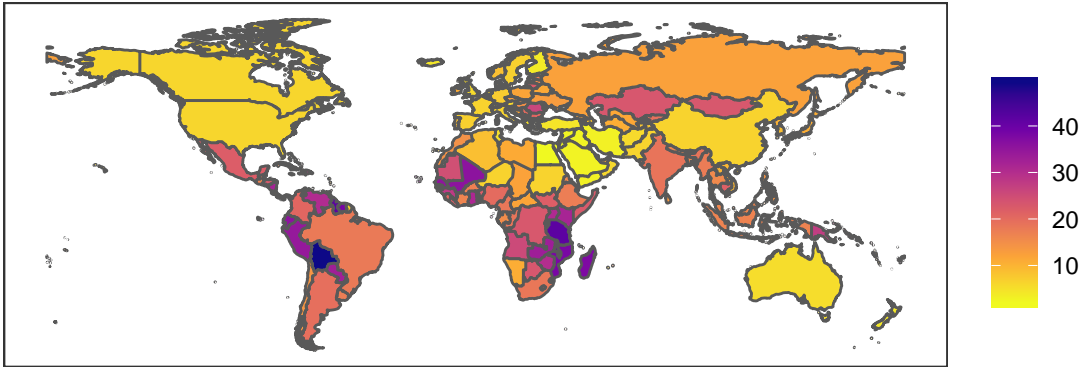

### Deaths averted per 1000 vaccinated girls

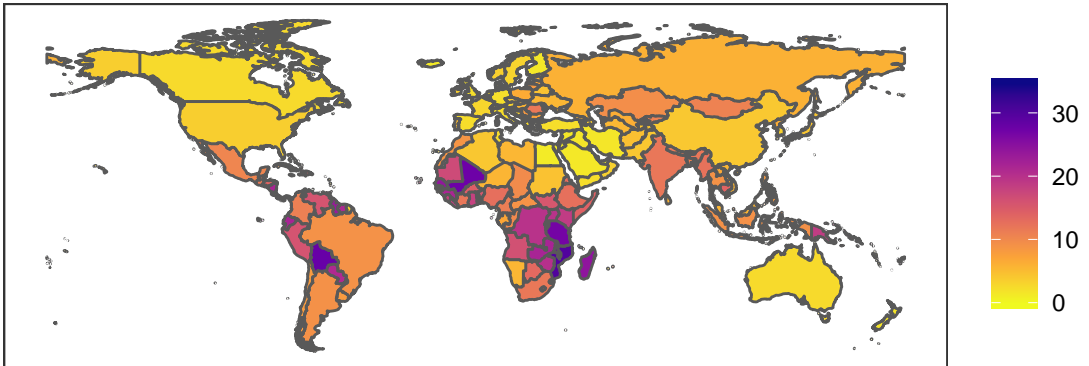

### DALYs averted per 1000 vaccinated girls

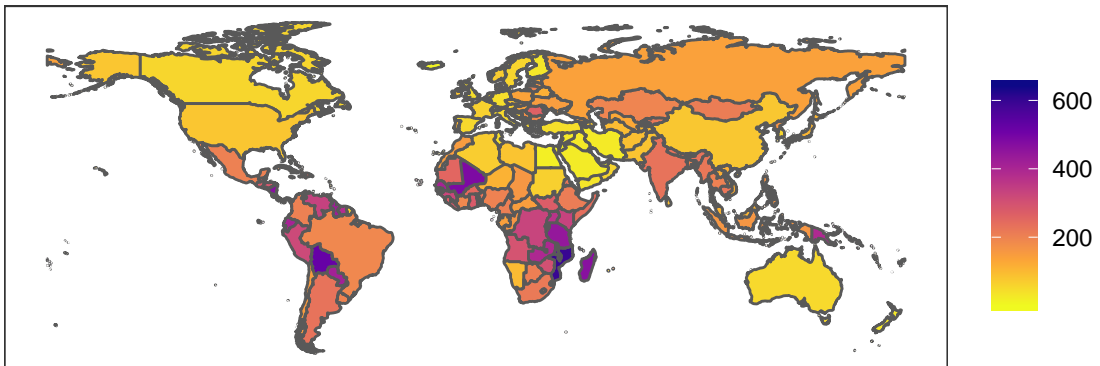

### YLDs averted per 1000 vaccinated girls

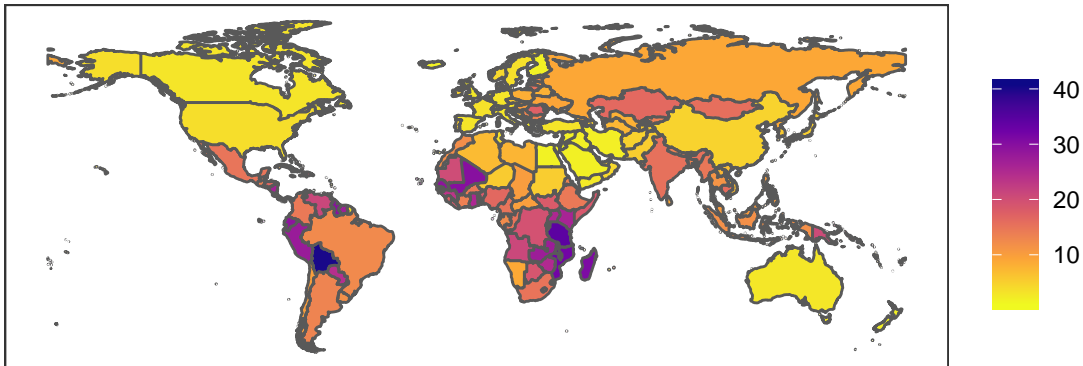

### YLLs averted per 1000 vaccinated girls

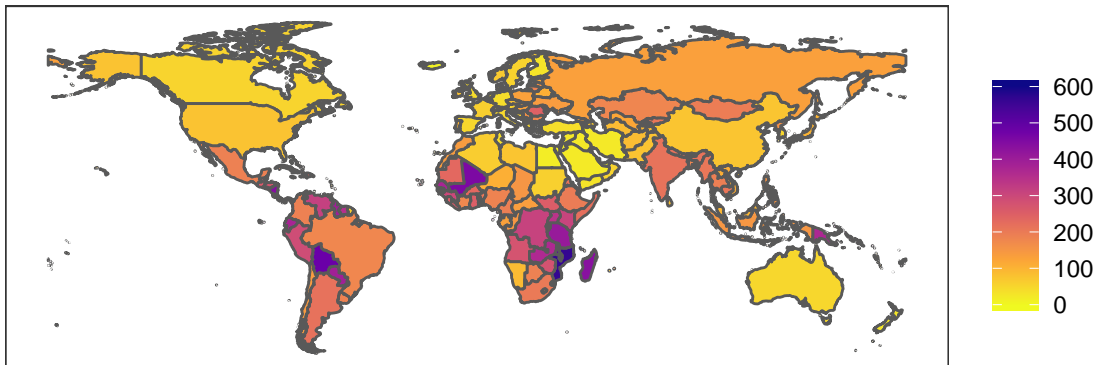

### DALYs averted per 1000 vaccinated girls

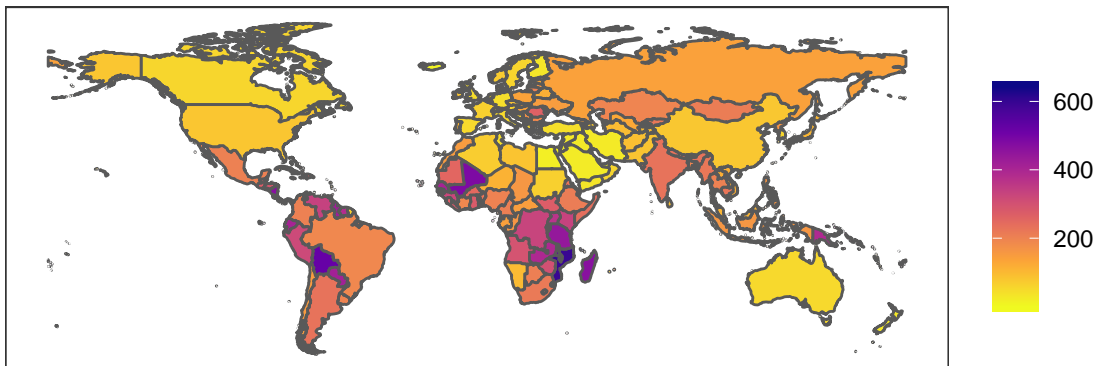

### Cases averted per 1000 vaccinated girls

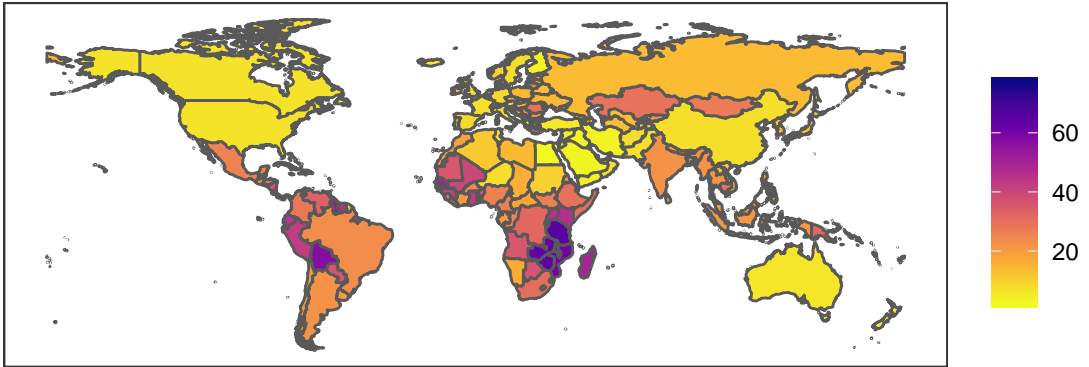

### Deaths averted per 1000 vaccinated girls

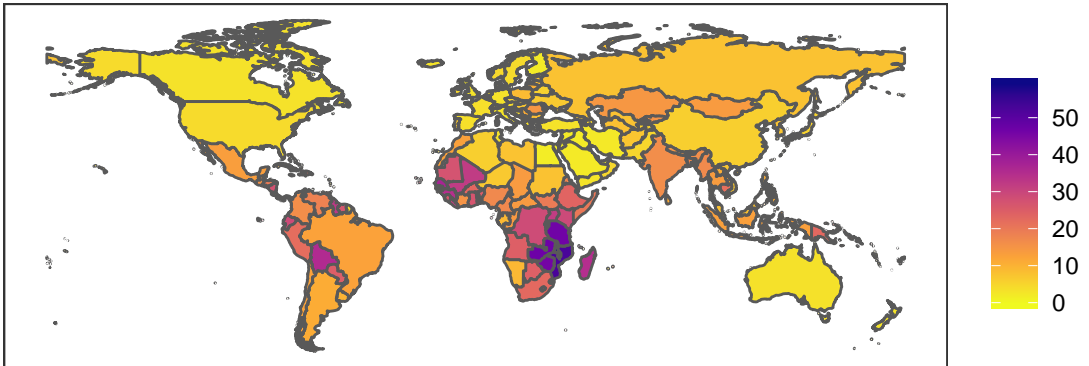

### DALYs averted per 1000 vaccinated girls

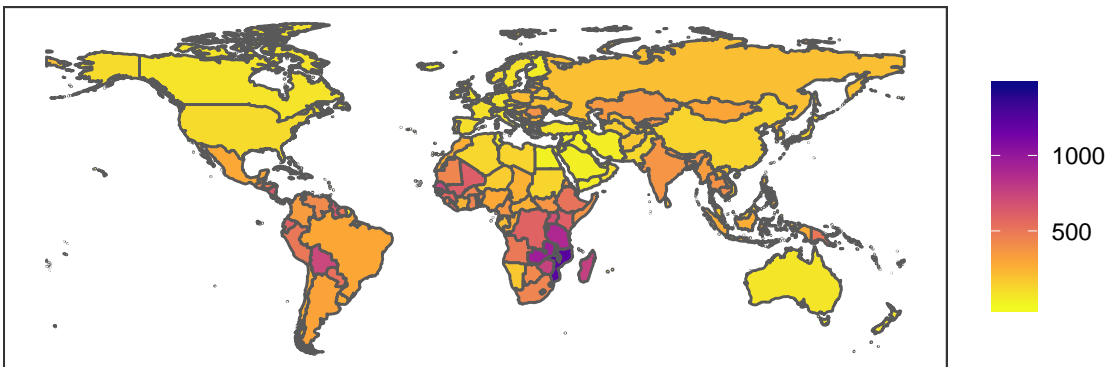

### YLDs averted per 1000 vaccinated girls

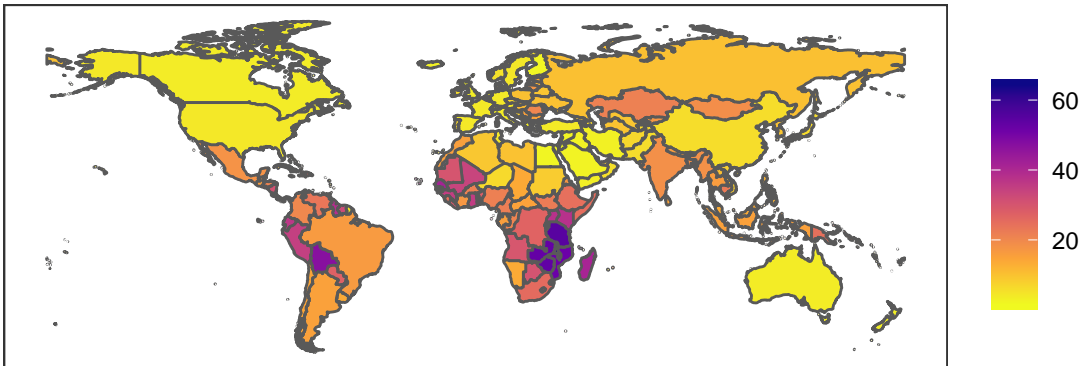

### YLLs averted per 1000 vaccinated girls

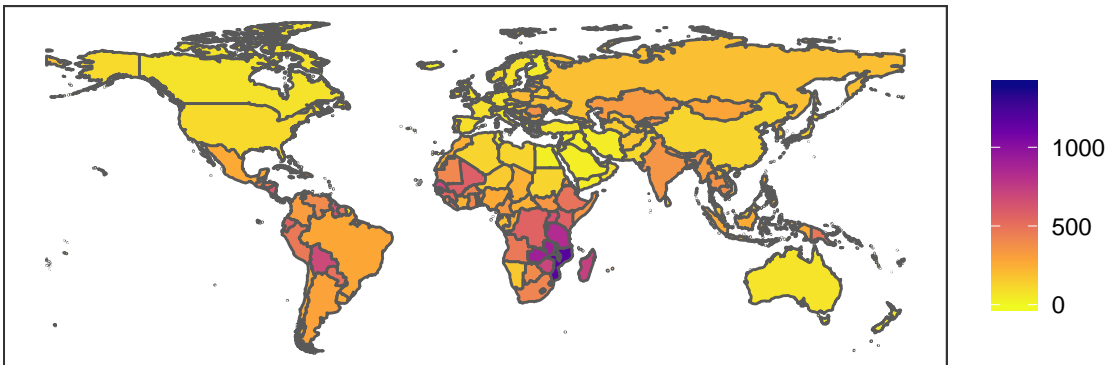

### DALYs averted per 1000 vaccinated girls

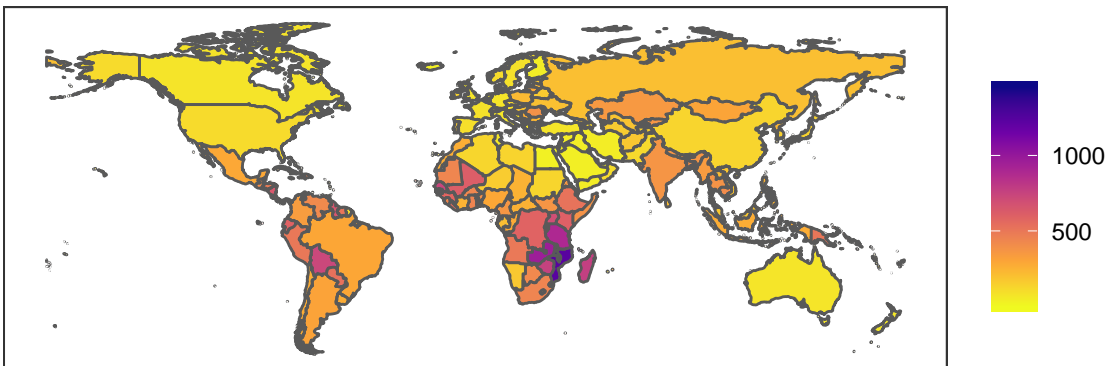

### Cases averted per 1000 vaccinated girls



### Deaths averted per 1000 vaccinated girls



### DALYs averted per 1000 vaccinated girls

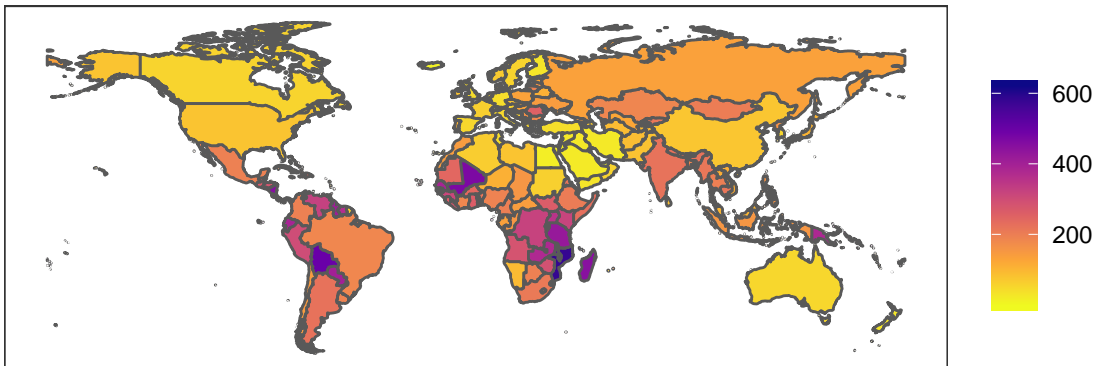



### YLDs averted per 1000 vaccinated girls

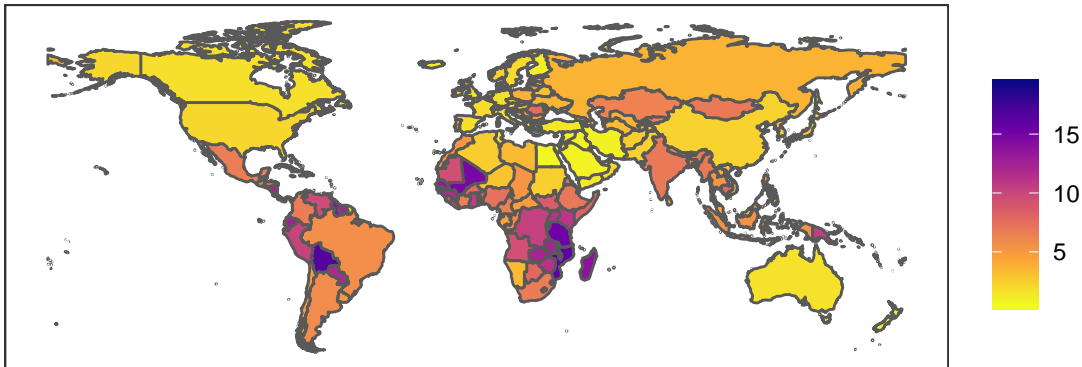

### YLLs averted per 1000 vaccinated girls

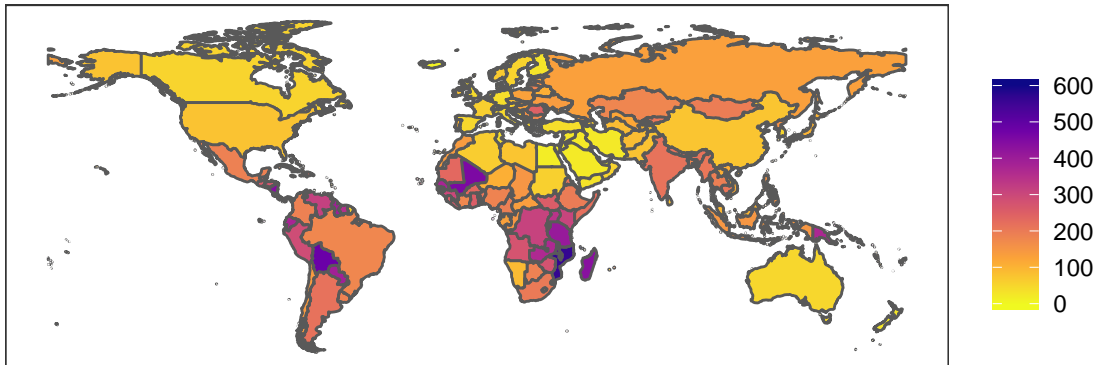

### DALYs averted per 1000 vaccinated girls

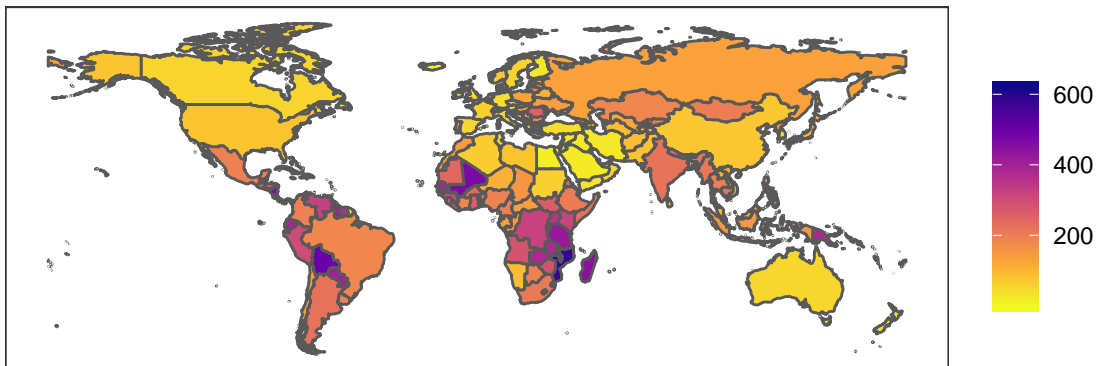

### Cases averted per 1000 vaccinated girls

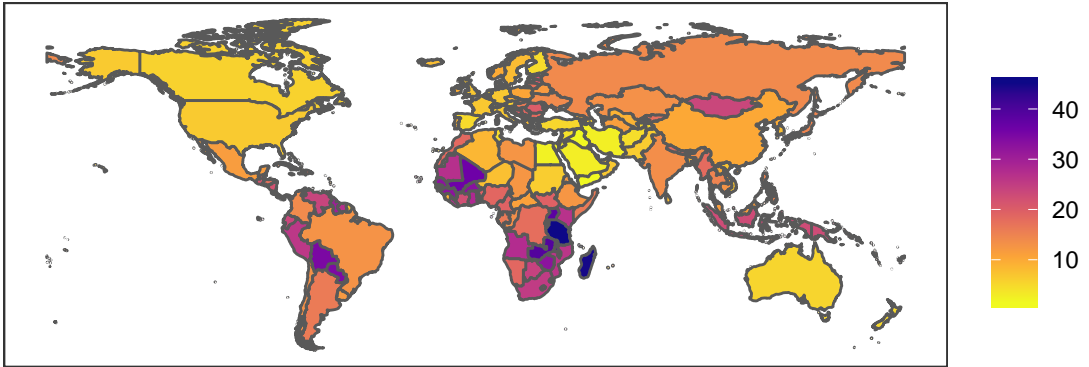

### Deaths averted per 1000 vaccinated girls

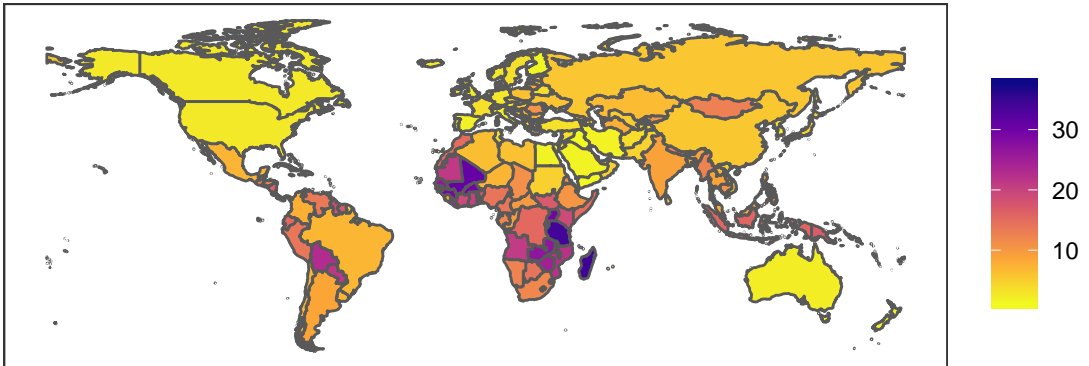

### DALYs averted per 1000 vaccinated girls

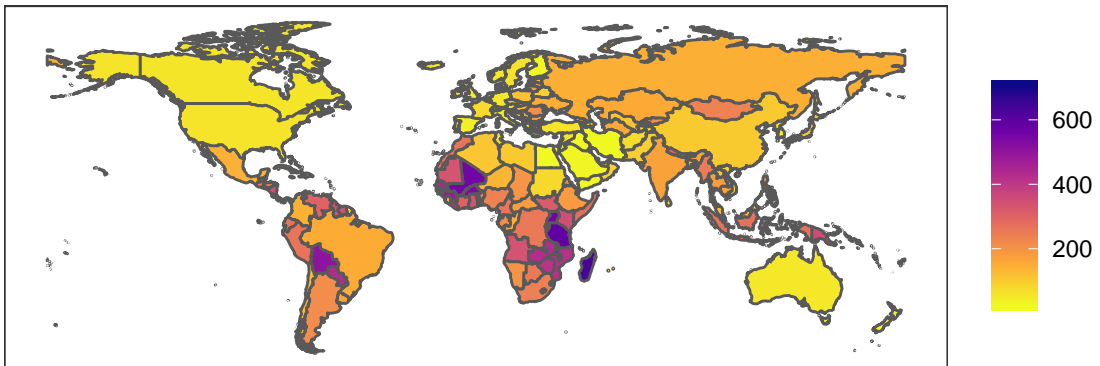

### YLDs averted per 1000 vaccinated girls

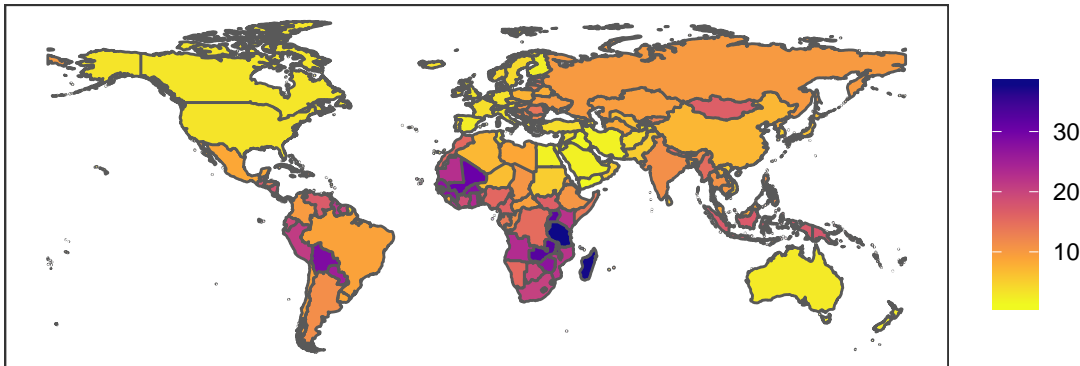

### YLLs averted per 1000 vaccinated girls

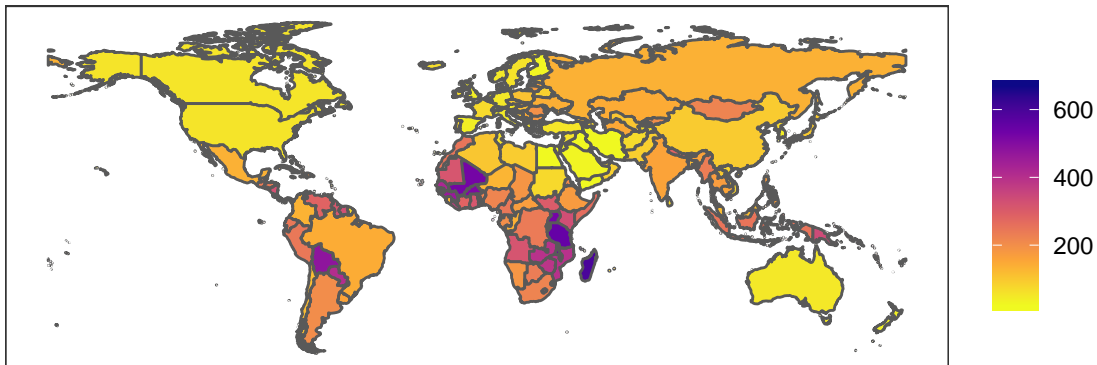

### DALYs averted per 1000 vaccinated girls

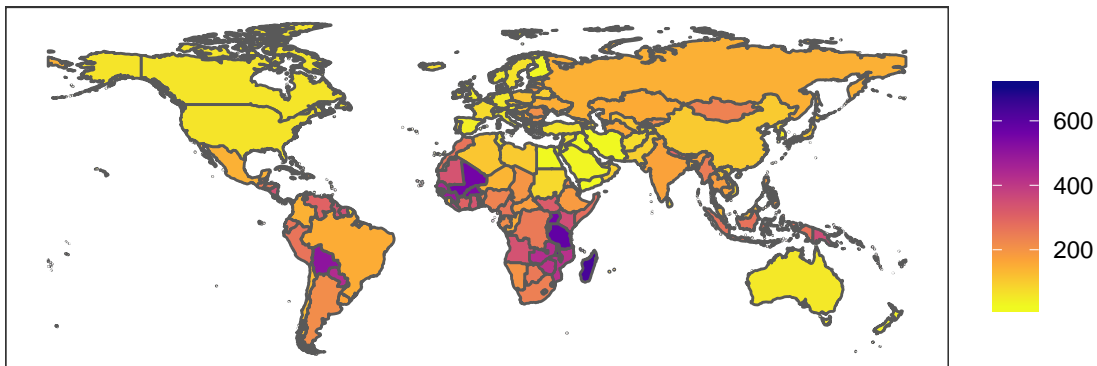

### Cases averted per 1000 vaccinated girls

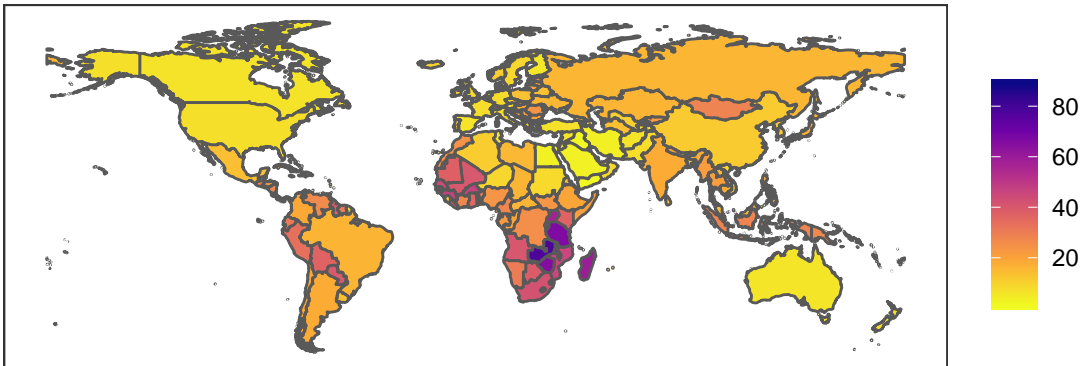

### Deaths averted per 1000 vaccinated girls

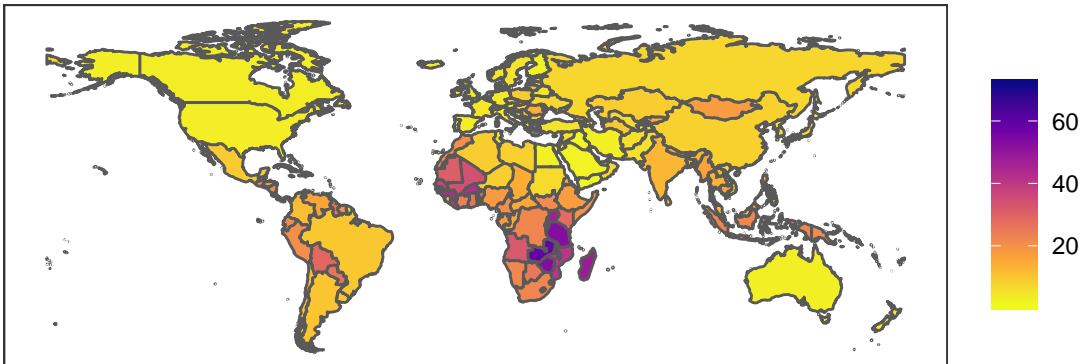

### DALYs averted per 1000 vaccinated girls

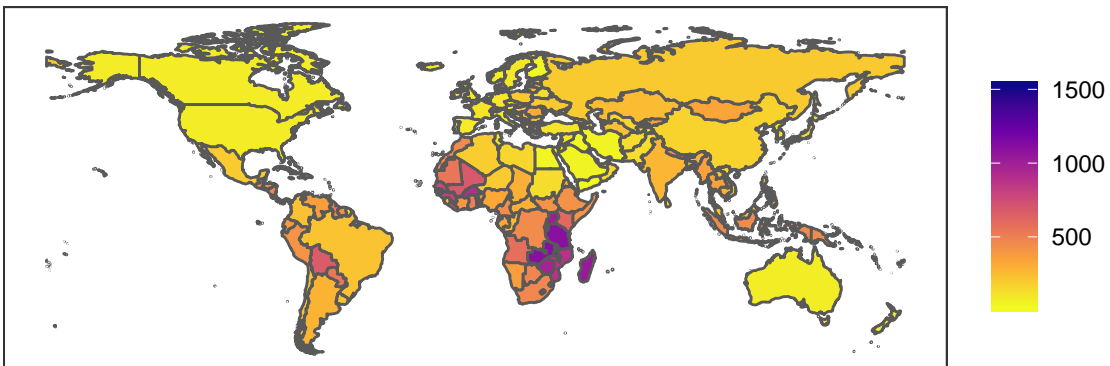

### YLDs averted per 1000 vaccinated girls

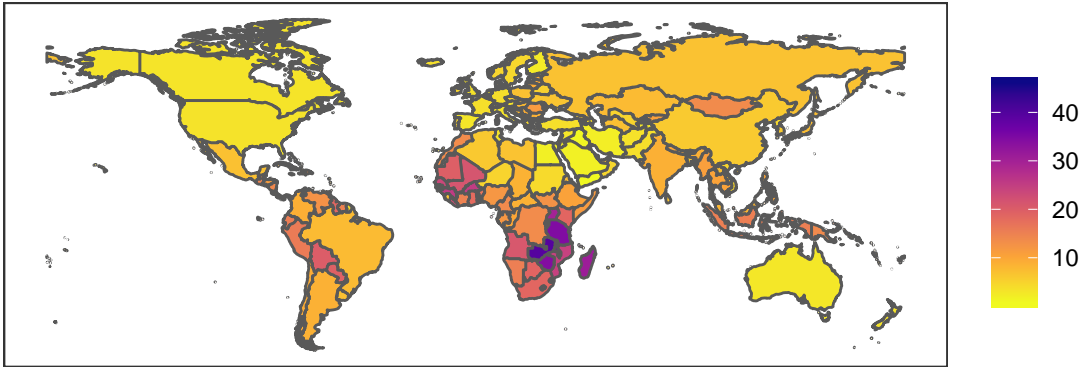

### YLLs averted per 1000 vaccinated girls

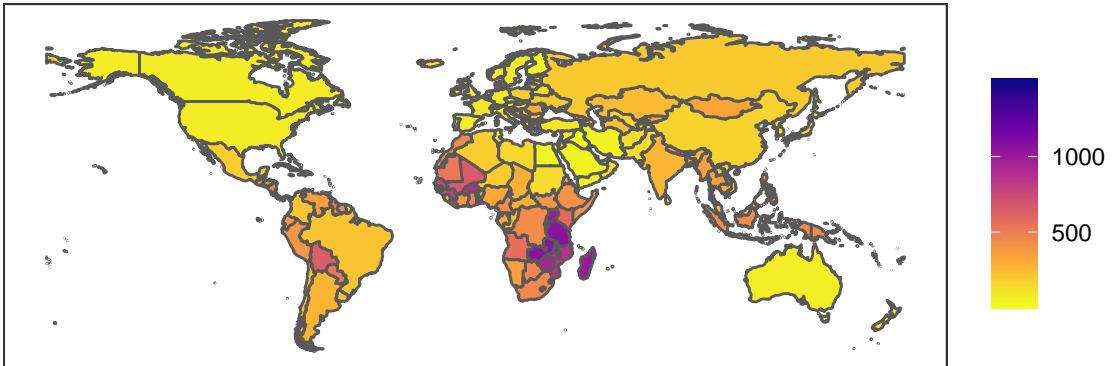

### DALYs averted per 1000 vaccinated girls

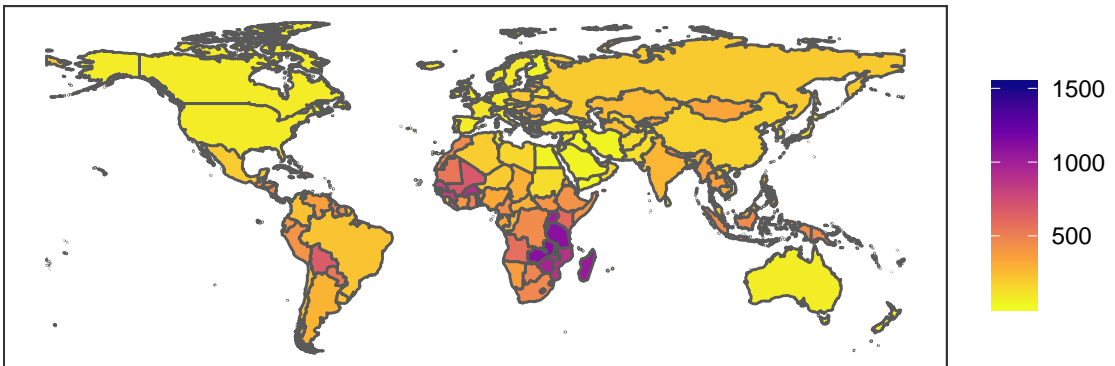

### Cases averted per 1000 vaccinated girls

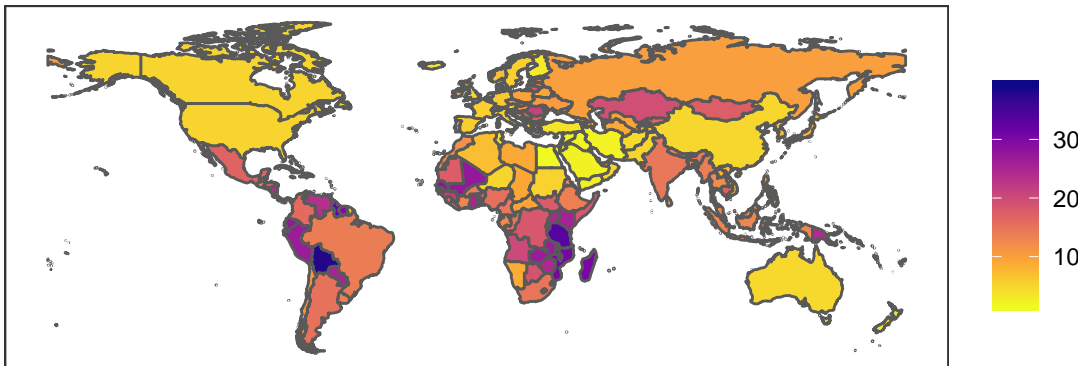

### Deaths averted per 1000 vaccinated girls

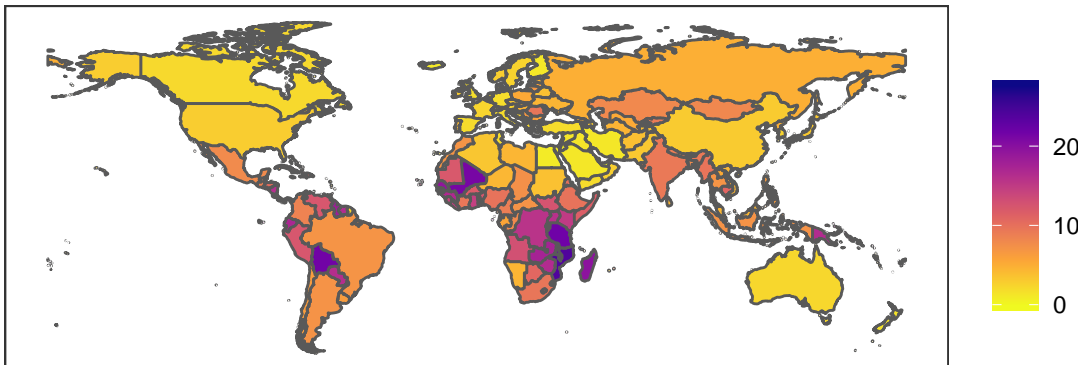

### DALYs averted per 1000 vaccinated girls

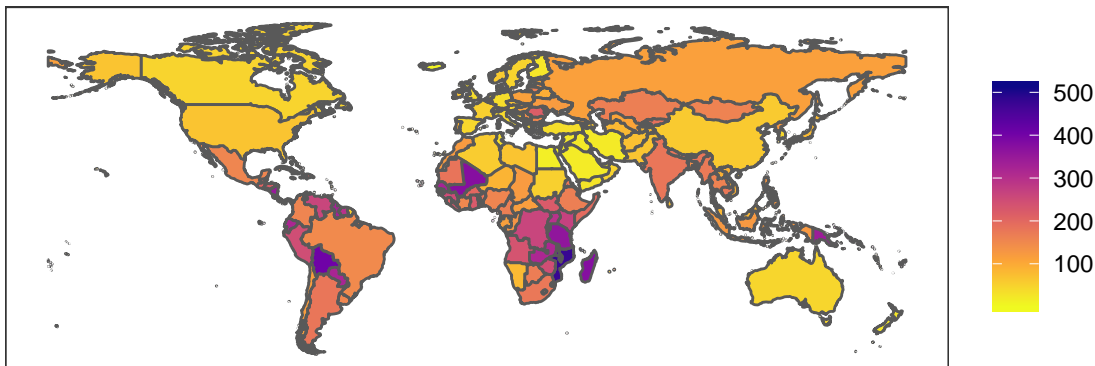

### YLDs averted per 1000 vaccinated girls

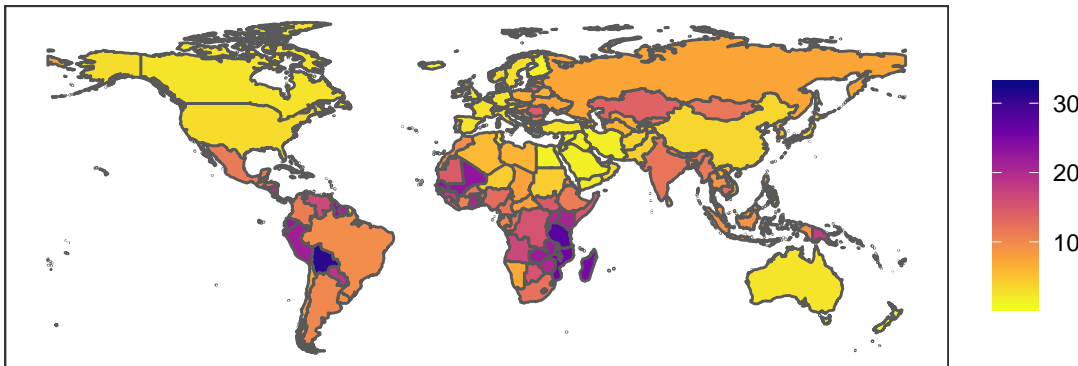

### YLLs averted per 1000 vaccinated girls

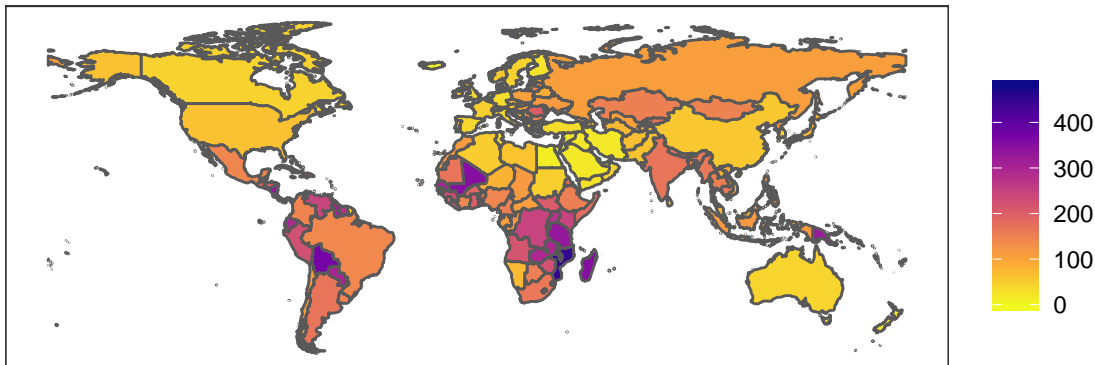

### DALYs averted per 1000 vaccinated girls



### Cases averted per 1000 vaccinated girls

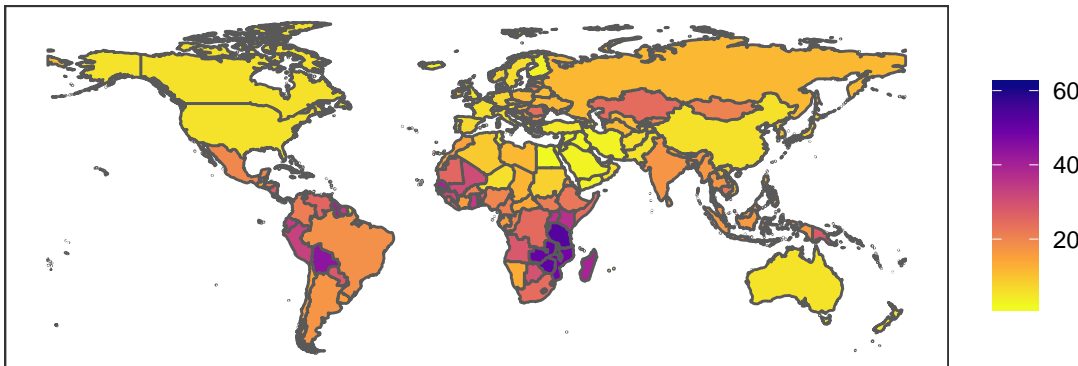

### Deaths averted per 1000 vaccinated girls

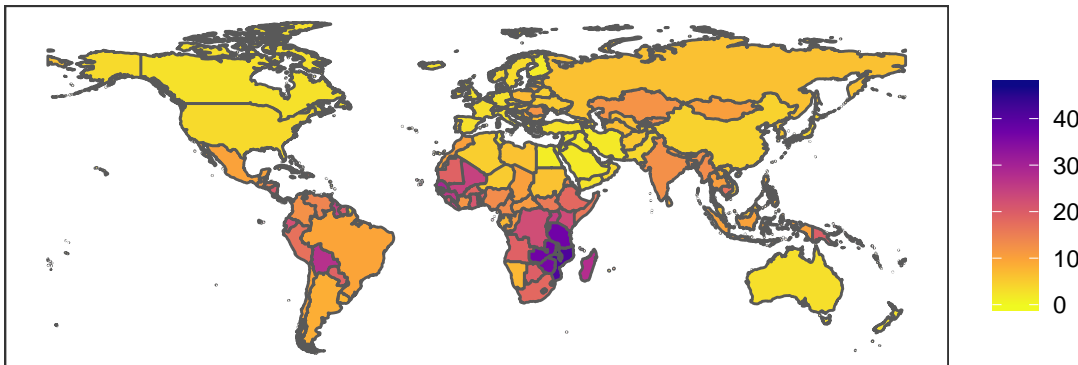

### DALYs averted per 1000 vaccinated girls

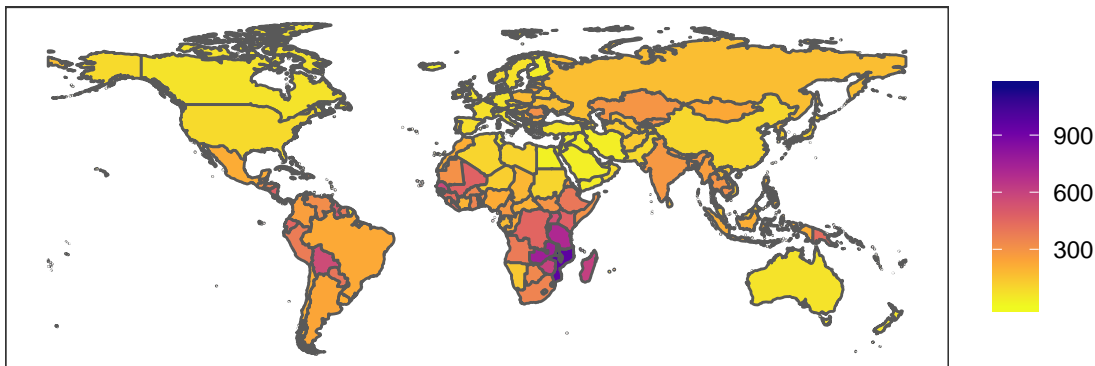



### YLDs averted per 1000 vaccinated girls

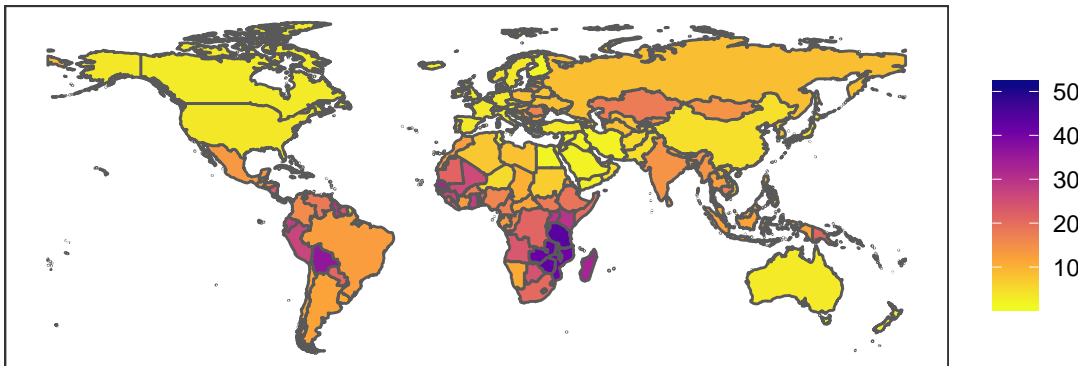

### YLLs averted per 1000 vaccinated girls

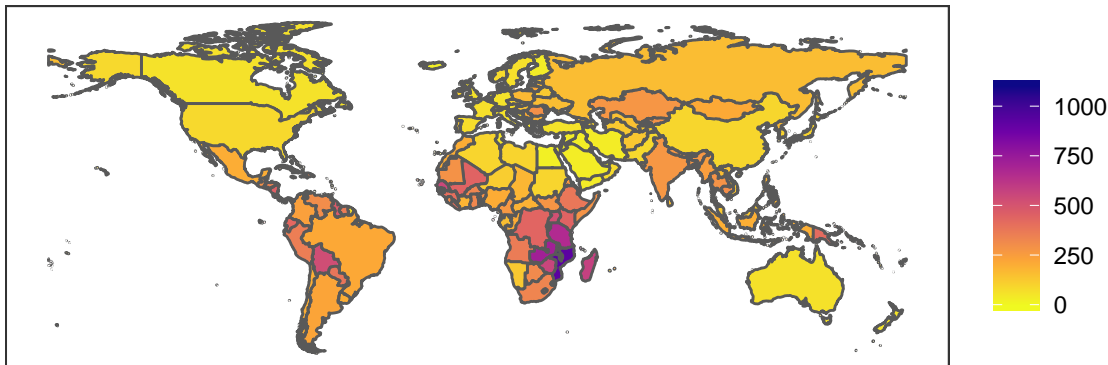

### DALYs averted per 1000 vaccinated girls



### Cases averted per 1000 vaccinated girls



### Deaths averted per 1000 vaccinated girls



### DALYs averted per 1000 vaccinated girls

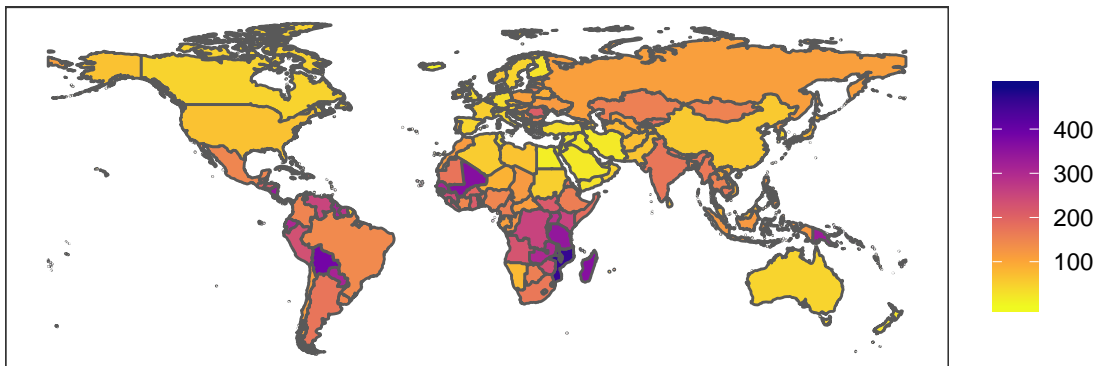

### YLDs averted per 1000 vaccinated girls

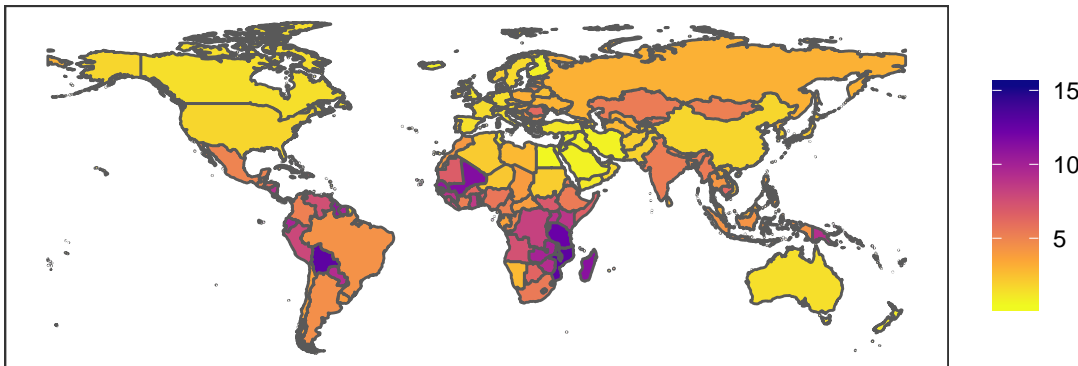

### YLLs averted per 1000 vaccinated girls

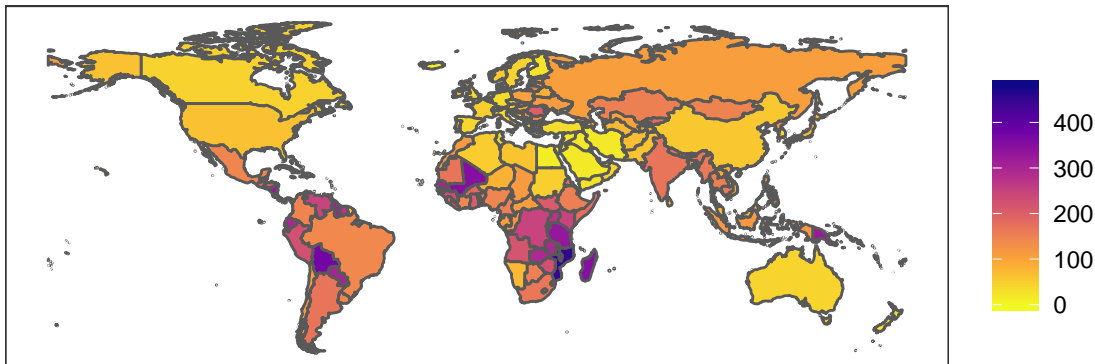

### DALYs averted per 1000 vaccinated girls



### Cases averted per 1000 vaccinated girls

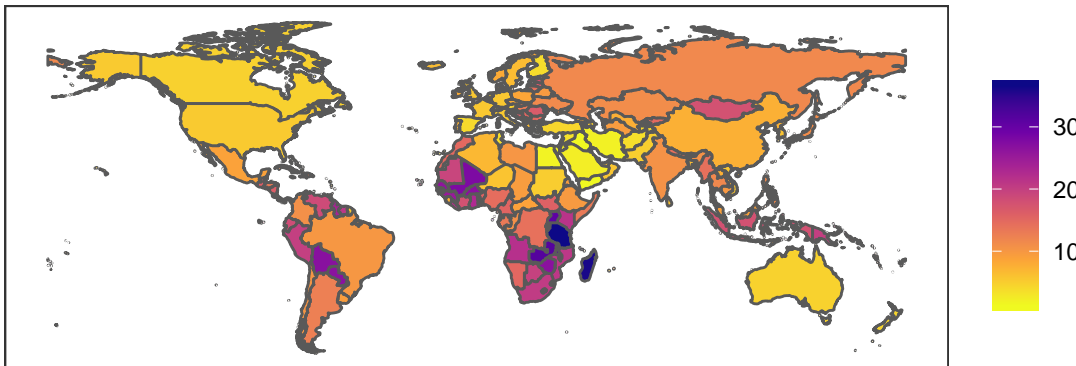

### Deaths averted per 1000 vaccinated girls

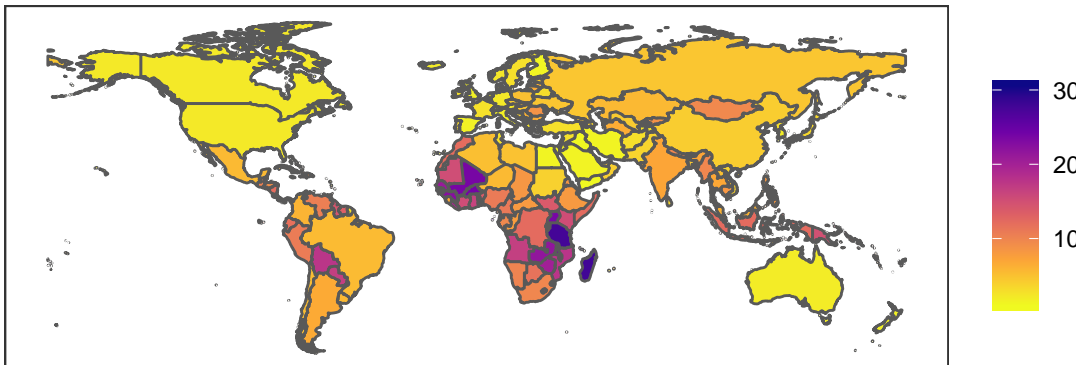

### DALYs averted per 1000 vaccinated girls

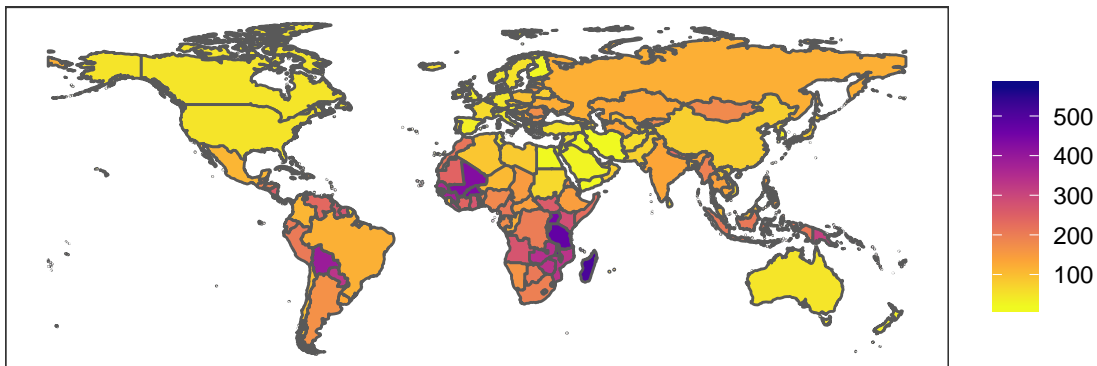

### YLDs averted per 1000 vaccinated girls

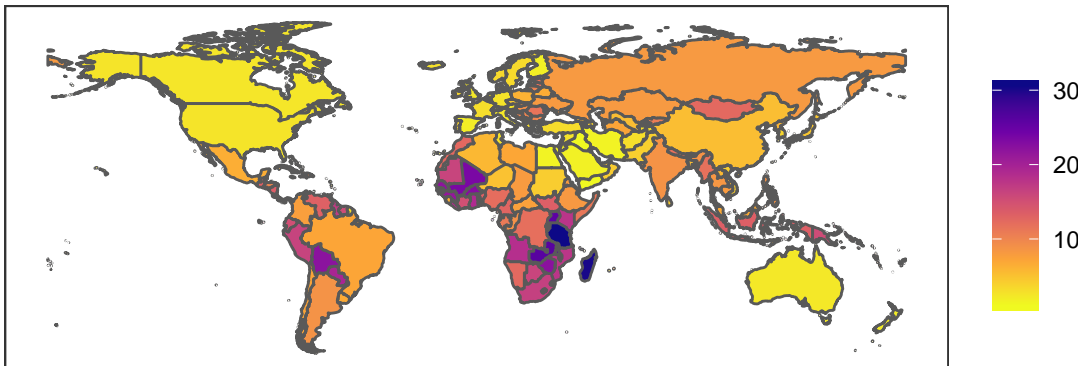

### YLLs averted per 1000 vaccinated girls

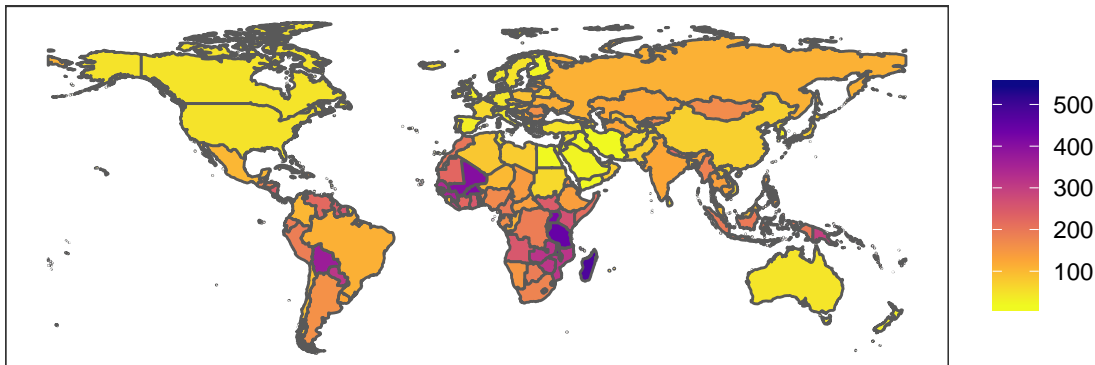

### DALYs averted per 1000 vaccinated girls

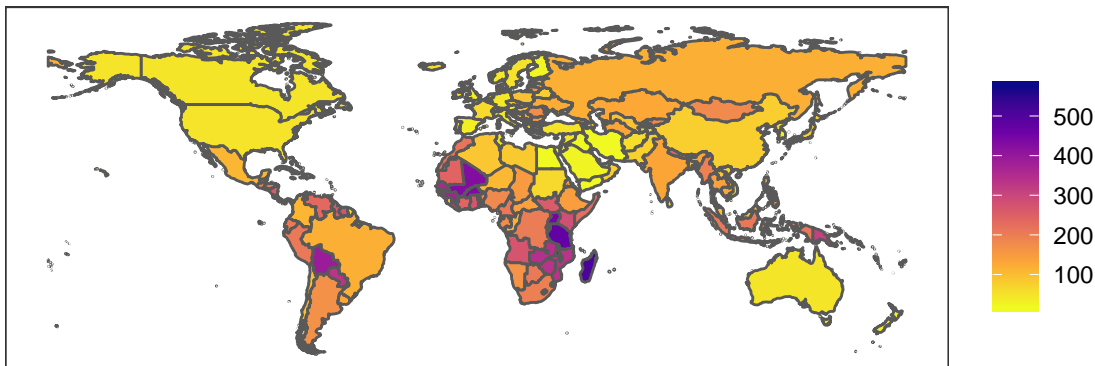

### Cases averted per 1000 vaccinated girls

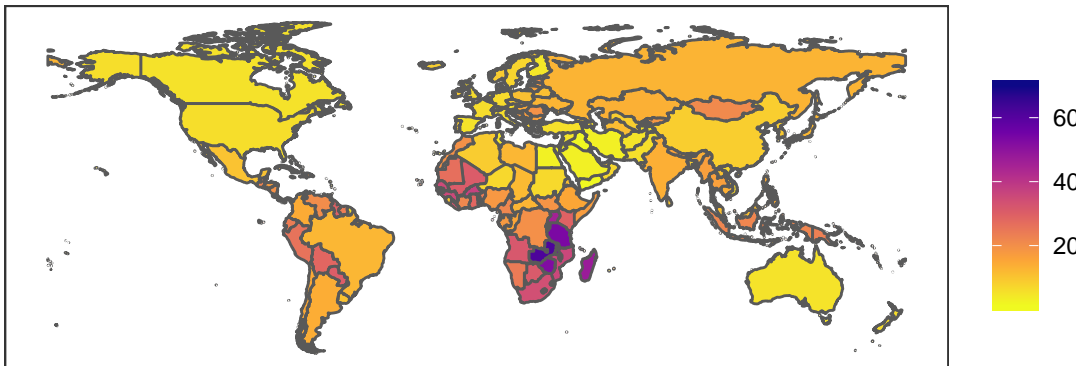

### Deaths averted per 1000 vaccinated girls

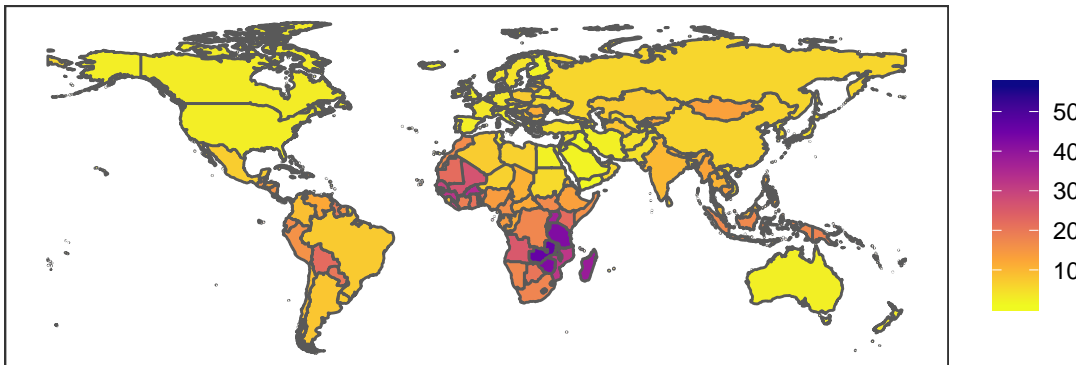

### DALYs averted per 1000 vaccinated girls

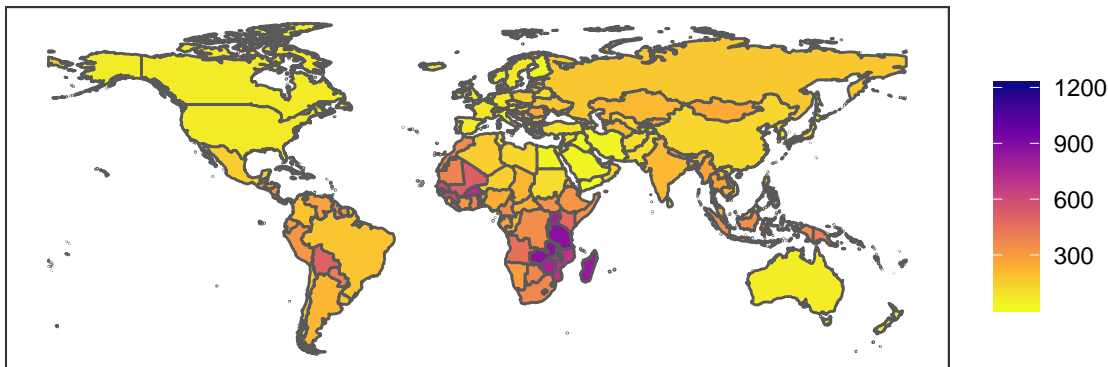

### YLDs averted per 1000 vaccinated girls

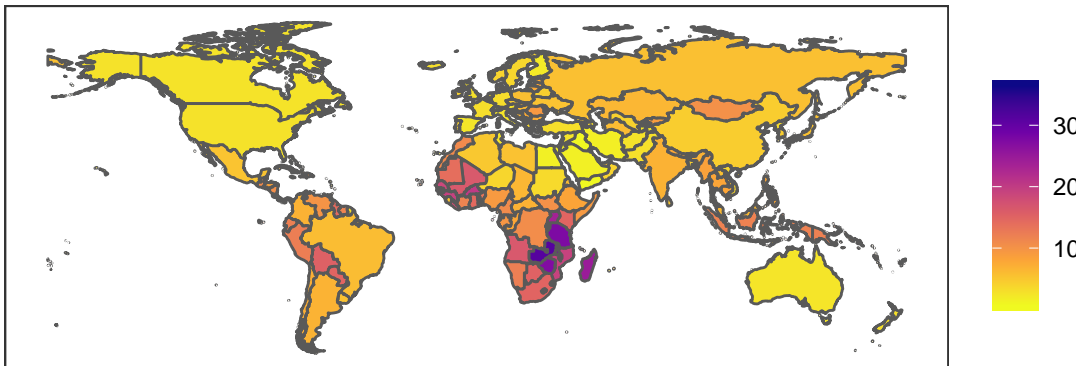

### YLLs averted per 1000 vaccinated girls

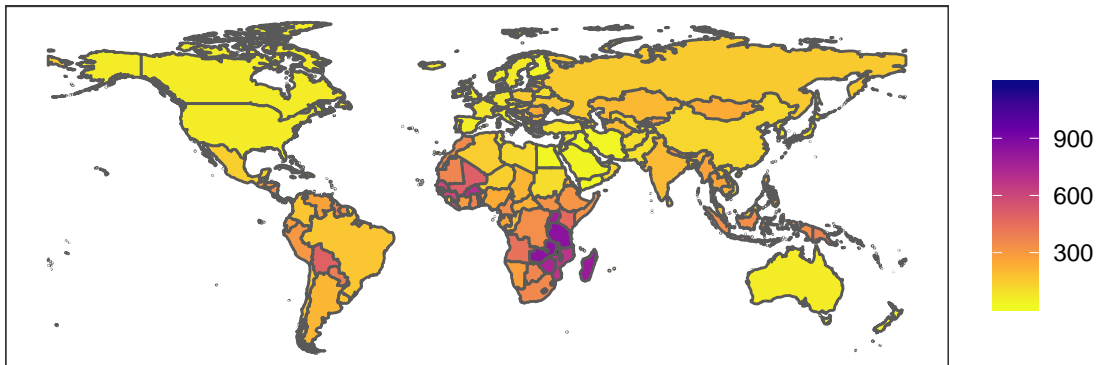

### DALYs averted per 1000 vaccinated girls

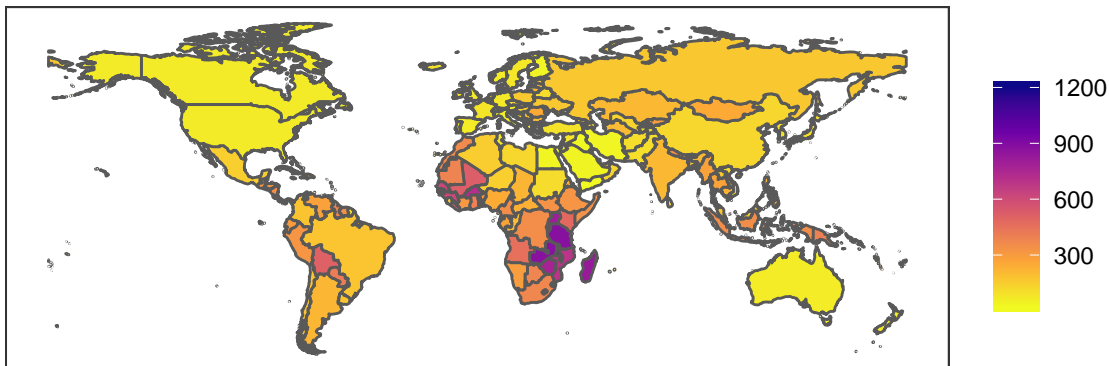

### Cases averted per 1000 vaccinated girls

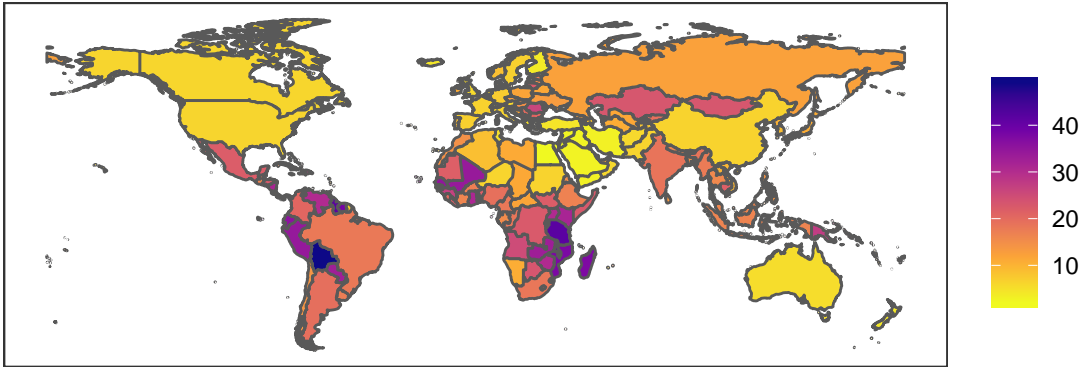

### Deaths averted per 1000 vaccinated girls

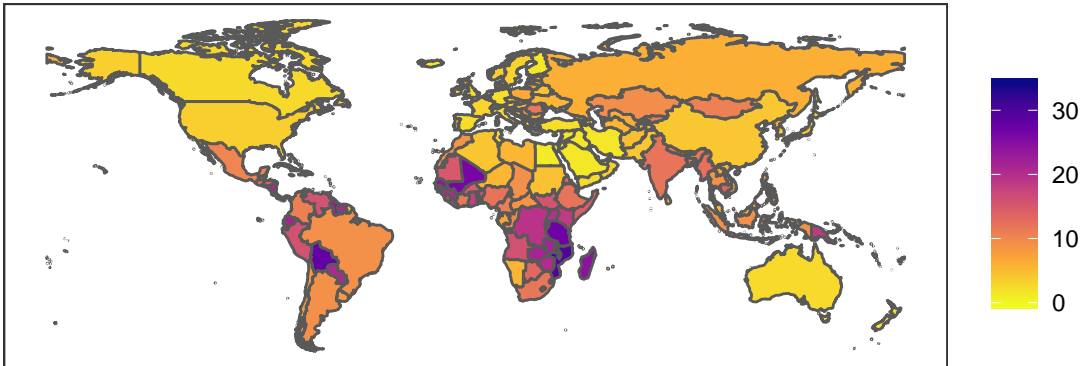

### DALYs averted per 1000 vaccinated girls

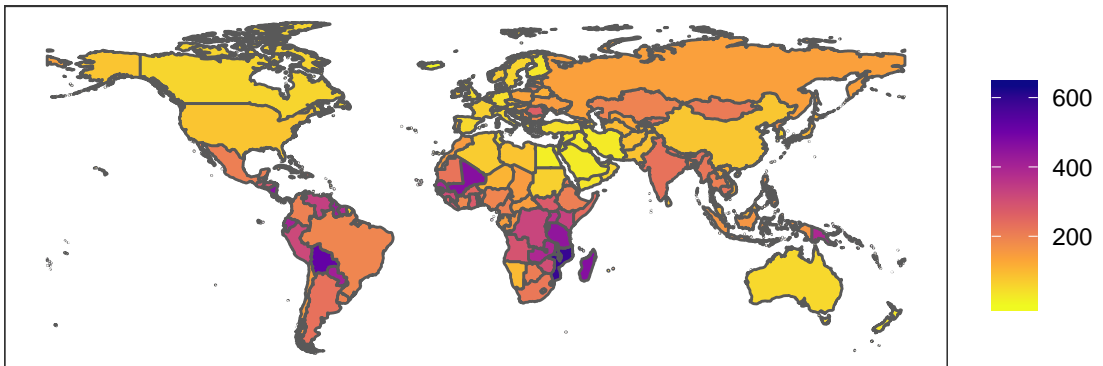



### YLDs averted per 1000 vaccinated girls

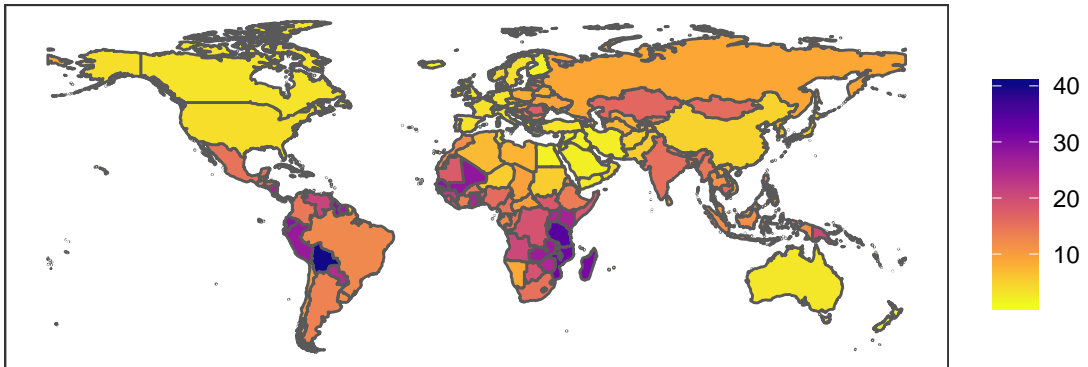

### YLLs averted per 1000 vaccinated girls

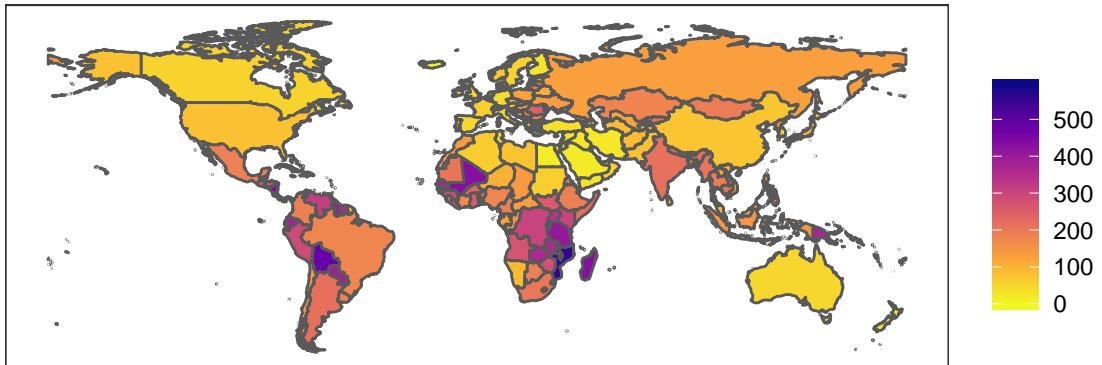

### DALYs averted per 1000 vaccinated girls

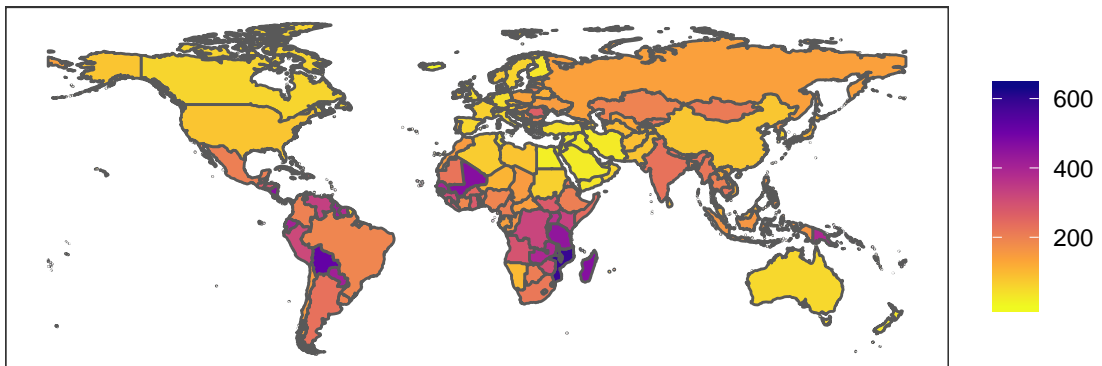

### Cases averted per 1000 vaccinated girls

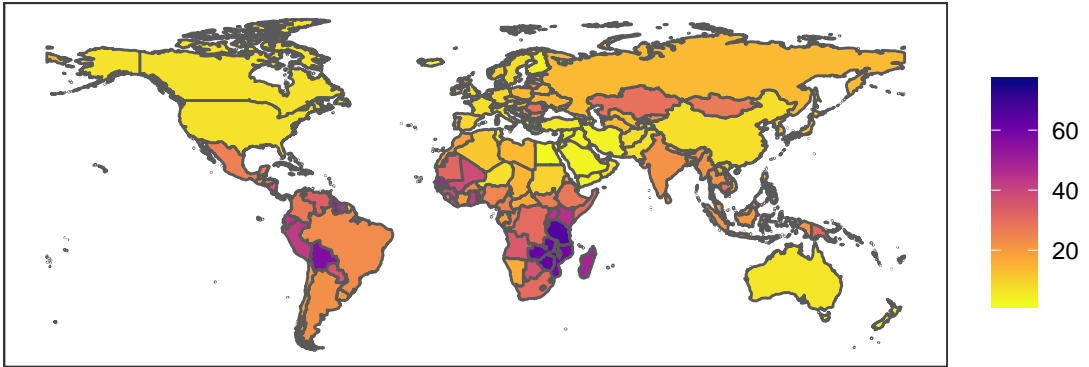

### Deaths averted per 1000 vaccinated girls

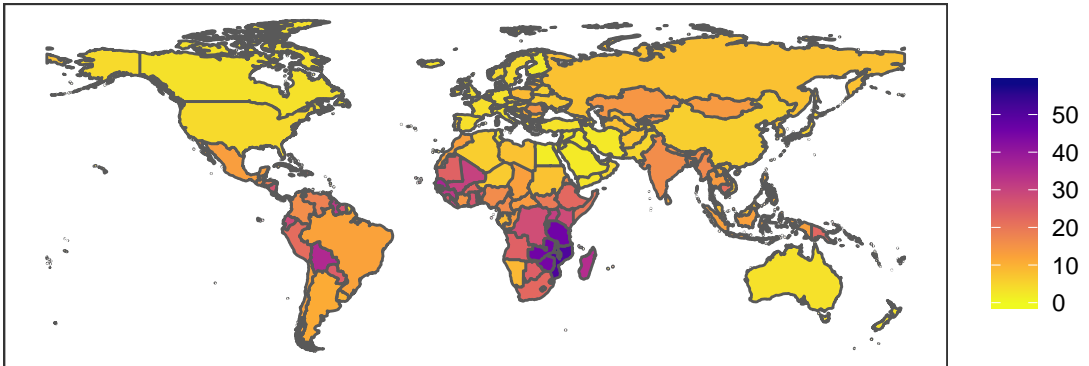

### DALYs averted per 1000 vaccinated girls

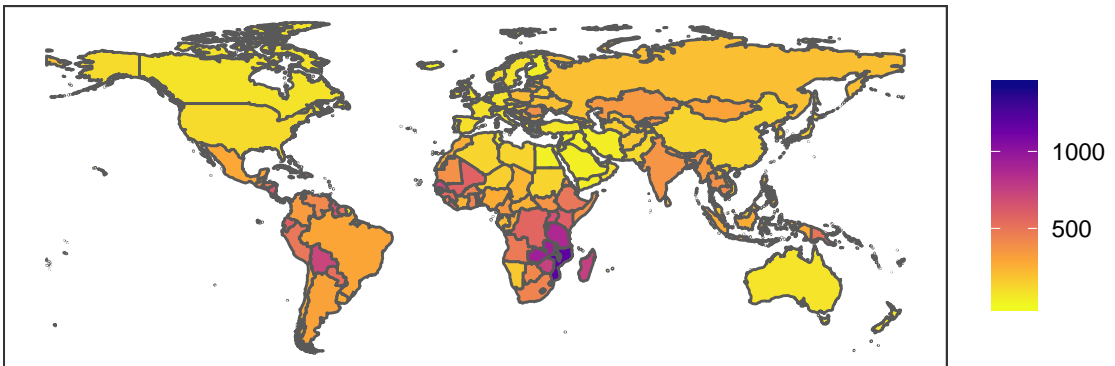

### YLDs averted per 1000 vaccinated girls

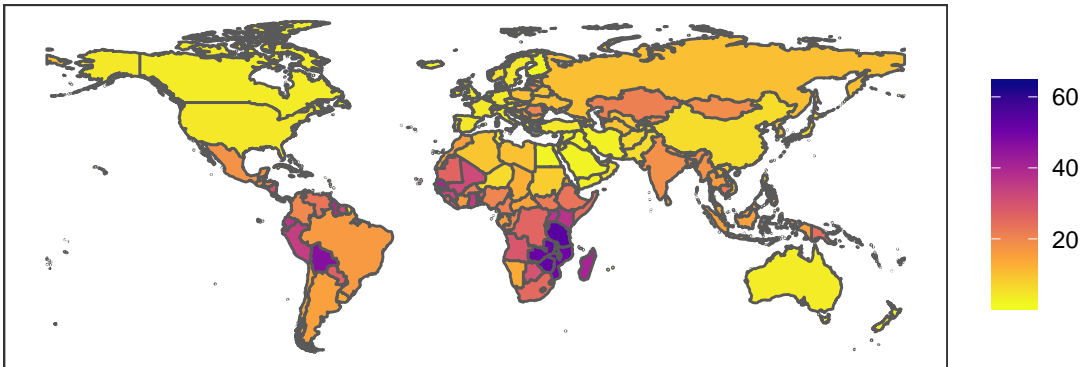

### YLLs averted per 1000 vaccinated girls

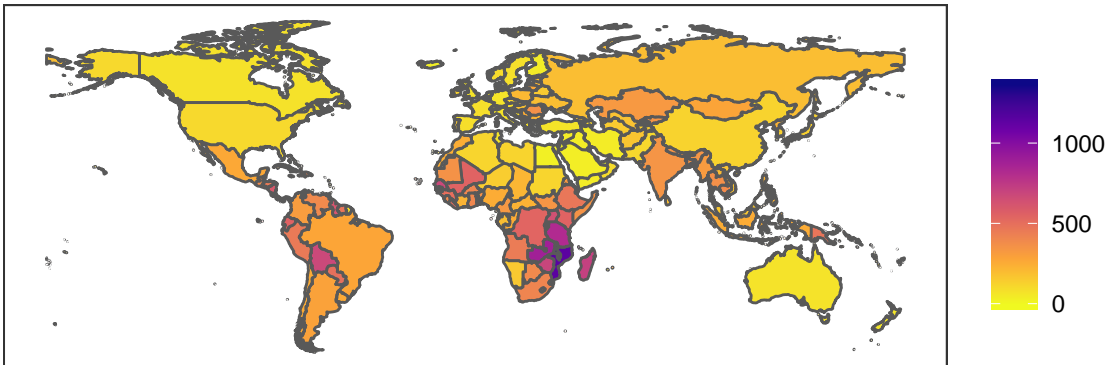

### DALYs averted per 1000 vaccinated girls

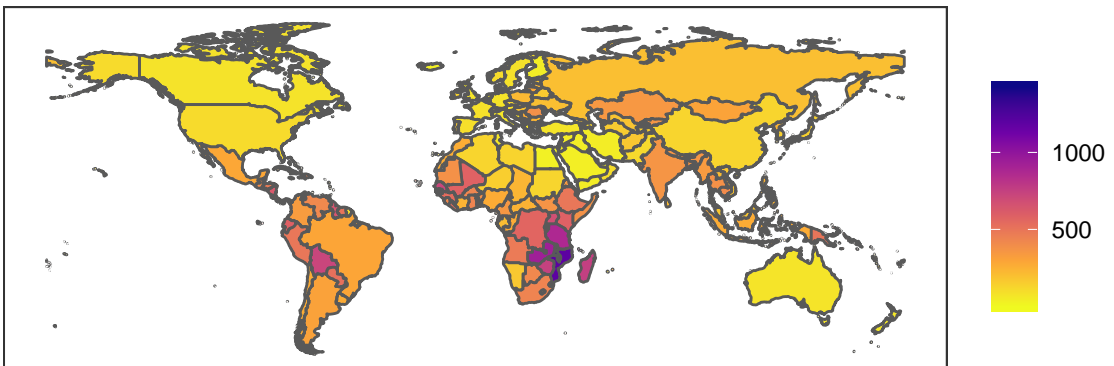

### Cases averted per 1000 vaccinated girls



### Deaths averted per 1000 vaccinated girls



### DALYs averted per 1000 vaccinated girls

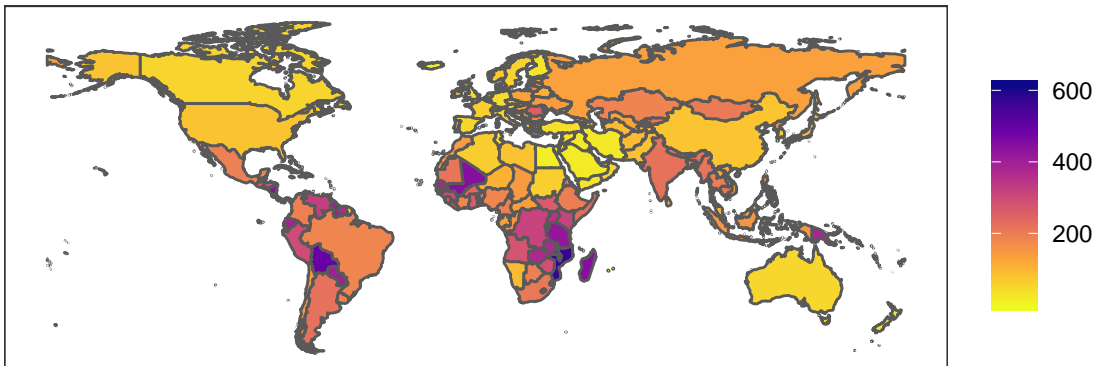

### YLDs averted per 1000 vaccinated girls

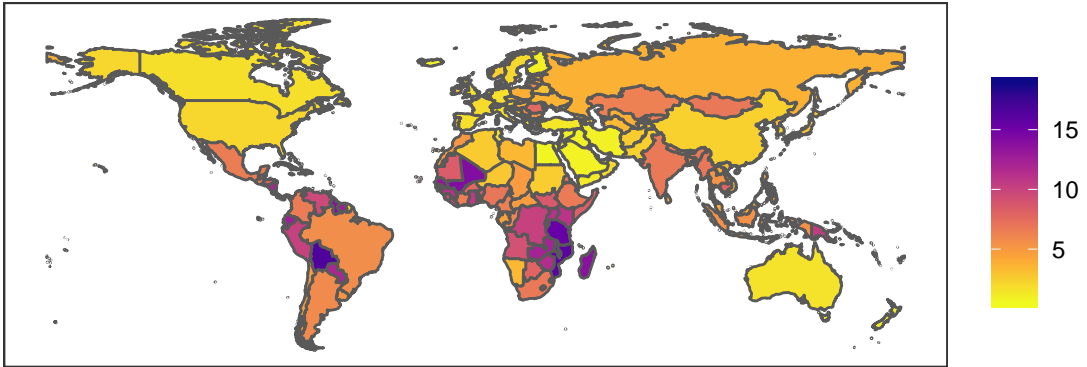

### YLLs averted per 1000 vaccinated girls

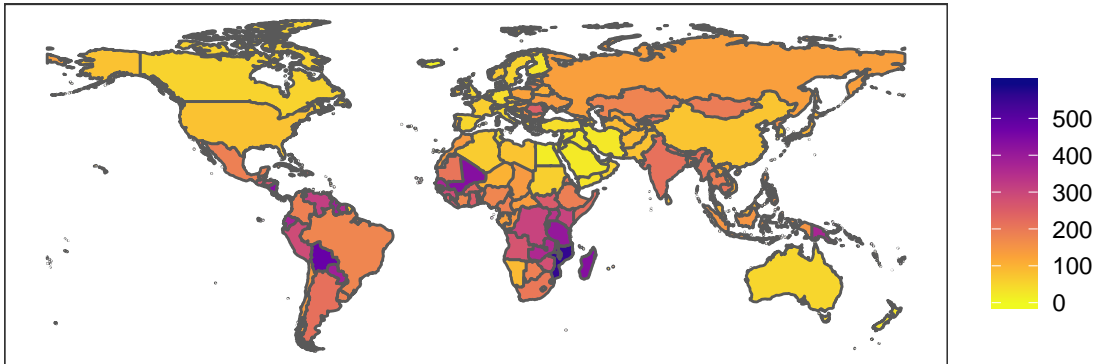

### DALYs averted per 1000 vaccinated girls

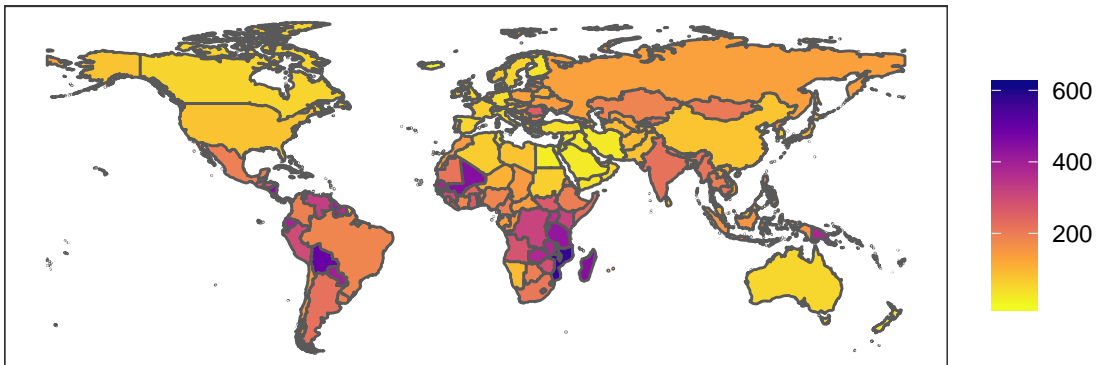

### Cases averted per 1000 vaccinated girls

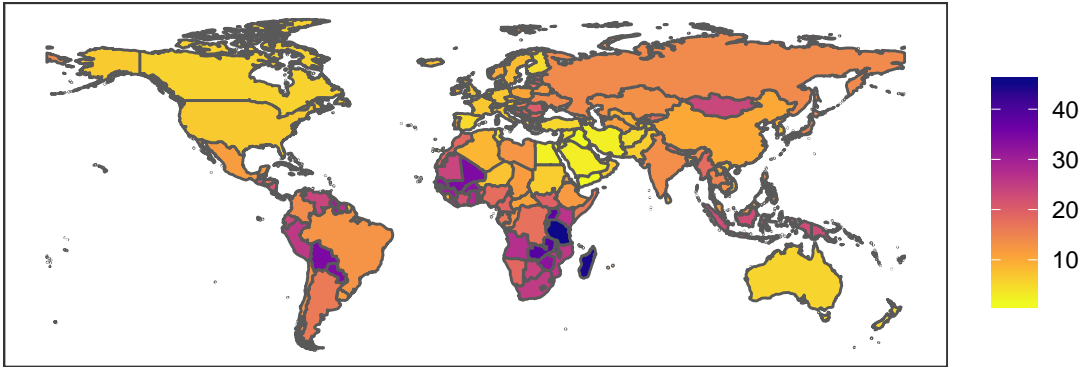

### Deaths averted per 1000 vaccinated girls

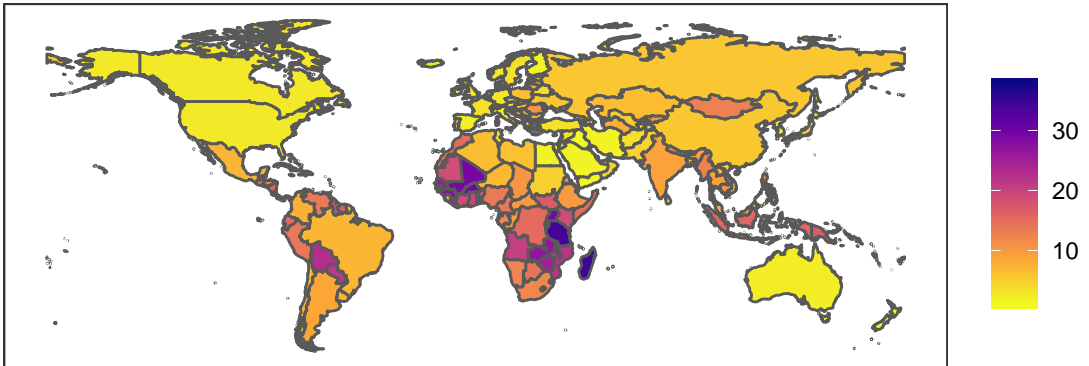

### DALYs averted per 1000 vaccinated girls

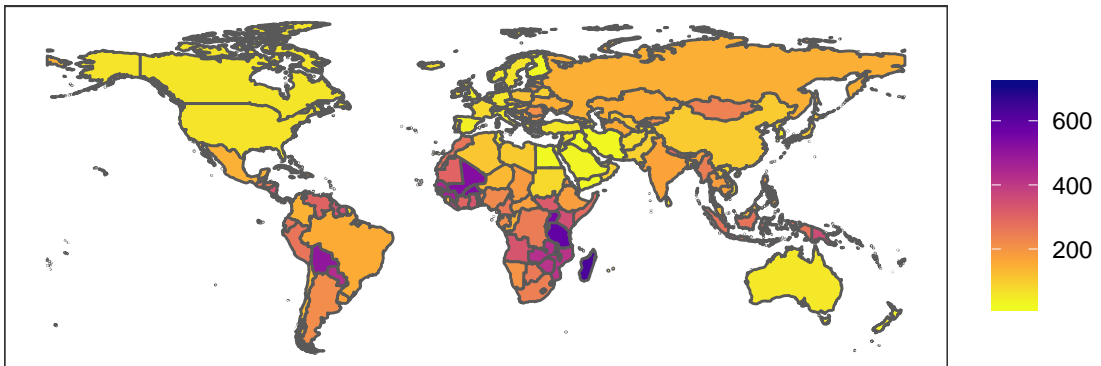

### YLDs averted per 1000 vaccinated girls

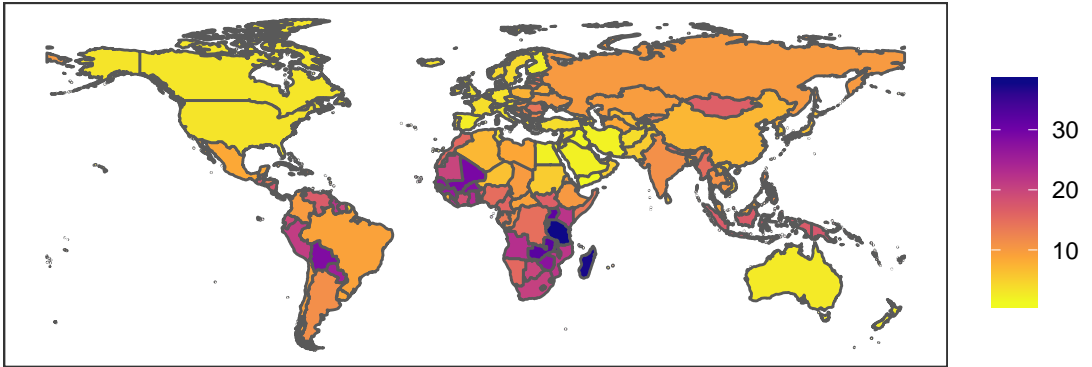

### YLLs averted per 1000 vaccinated girls

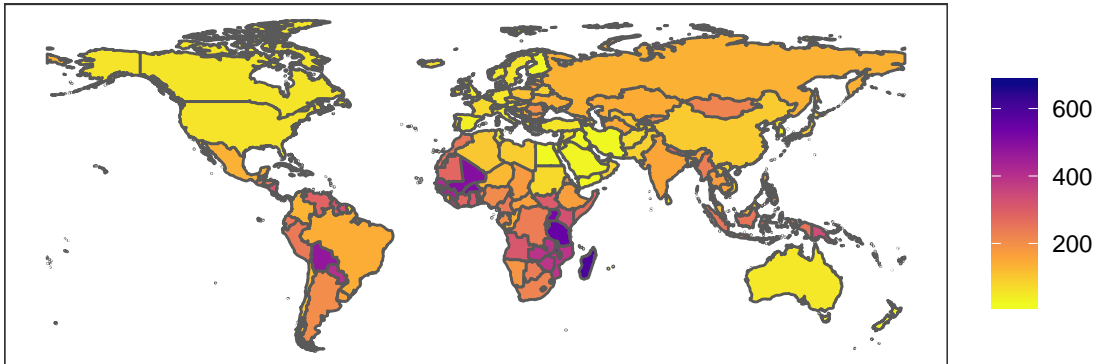

### DALYs averted per 1000 vaccinated girls

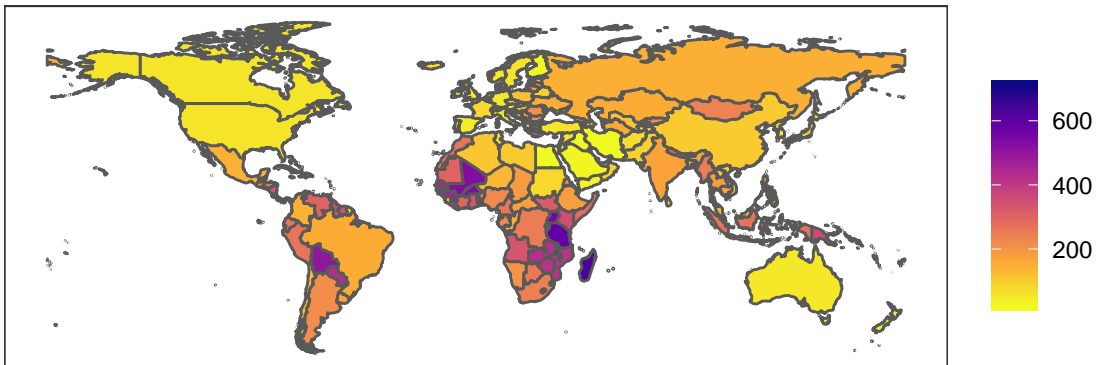

### Cases averted per 1000 vaccinated girls

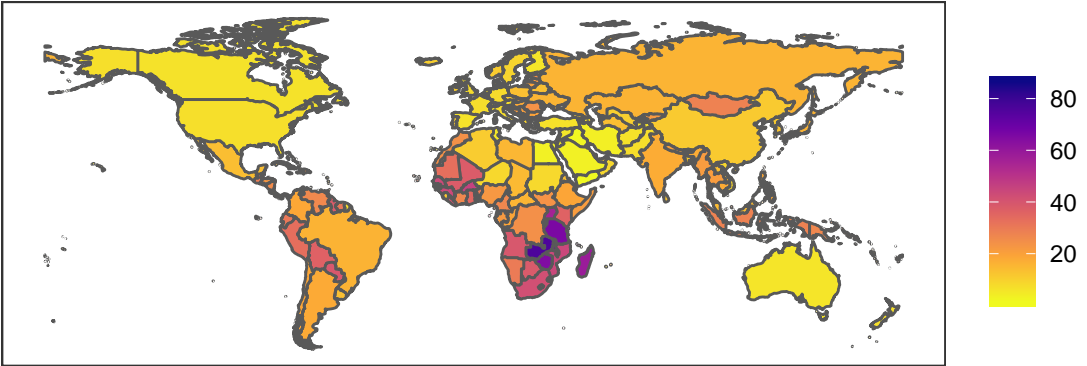

### Deaths averted per 1000 vaccinated girls

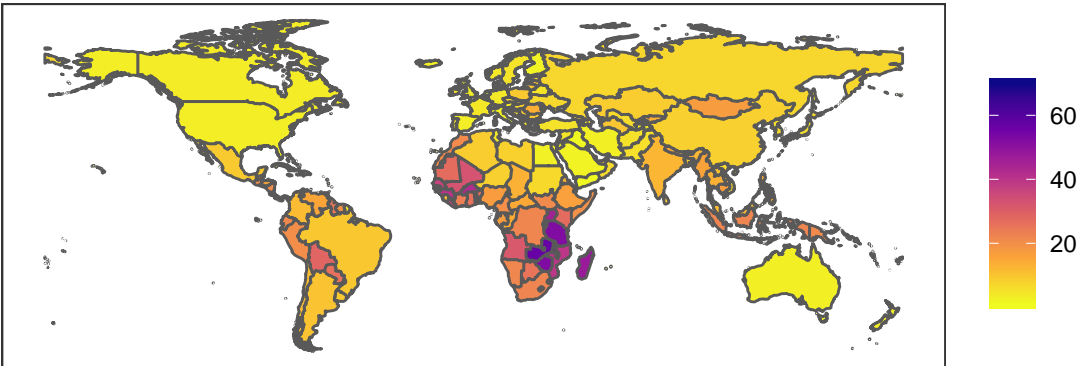

### DALYs averted per 1000 vaccinated girls

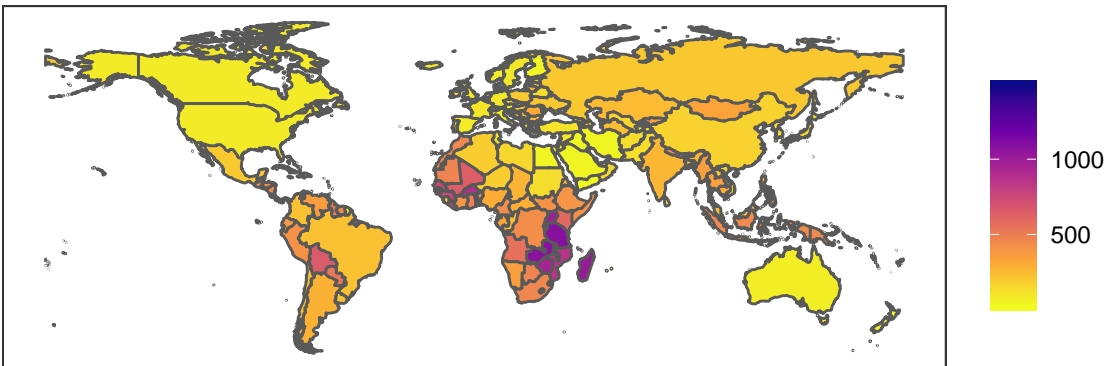



### YLDs averted per 1000 vaccinated girls

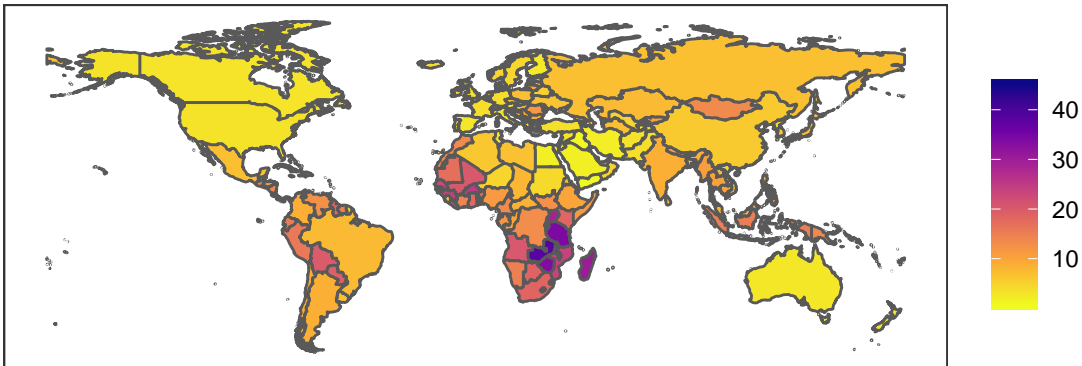

### YLLs averted per 1000 vaccinated girls

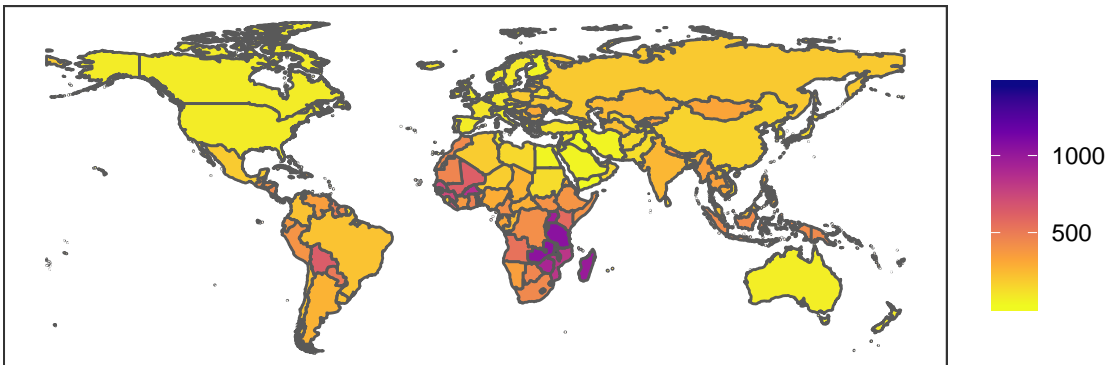

### DALYs averted per 1000 vaccinated girls

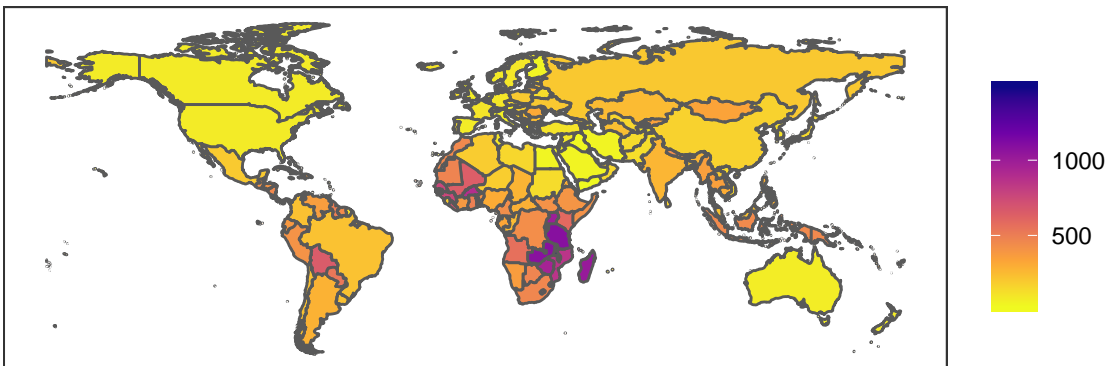

#### **A16. Vaccination impact per 1000 vaccinated girls at the national level**

Lifetime health impact of HPV vaccination on cases, deaths, YLLs, YLDs and DALYs averted per 1000 vaccinated girls in 177 countries for the 5 comparative scenarios for bivalent/quadrivalent and nonavalent vaccination of 9-year-old and 12-year-old girls.

See appendix 2 for data on the lifetime health impact of HPV vaccination.

**A17. Vaccination impact per 1000 vaccinated girls at the national level – updated PRIME estimates**

Lifetime health impact of HPV vaccination on cases, deaths, YLLs, YLDs and DALYs averted per 1000 vaccinated girls in 177 countries for bivalent/quadrivalent and nonavalent vaccination of 9-year-old and 12-year-old girls (estimates after the combined PRIME updates for demography, disability weights and cervical cancer burden).

# Cases averted per 1000 vaccinated girls (vaccination age = 9 years / bivalent/quadrivalent vaccine)

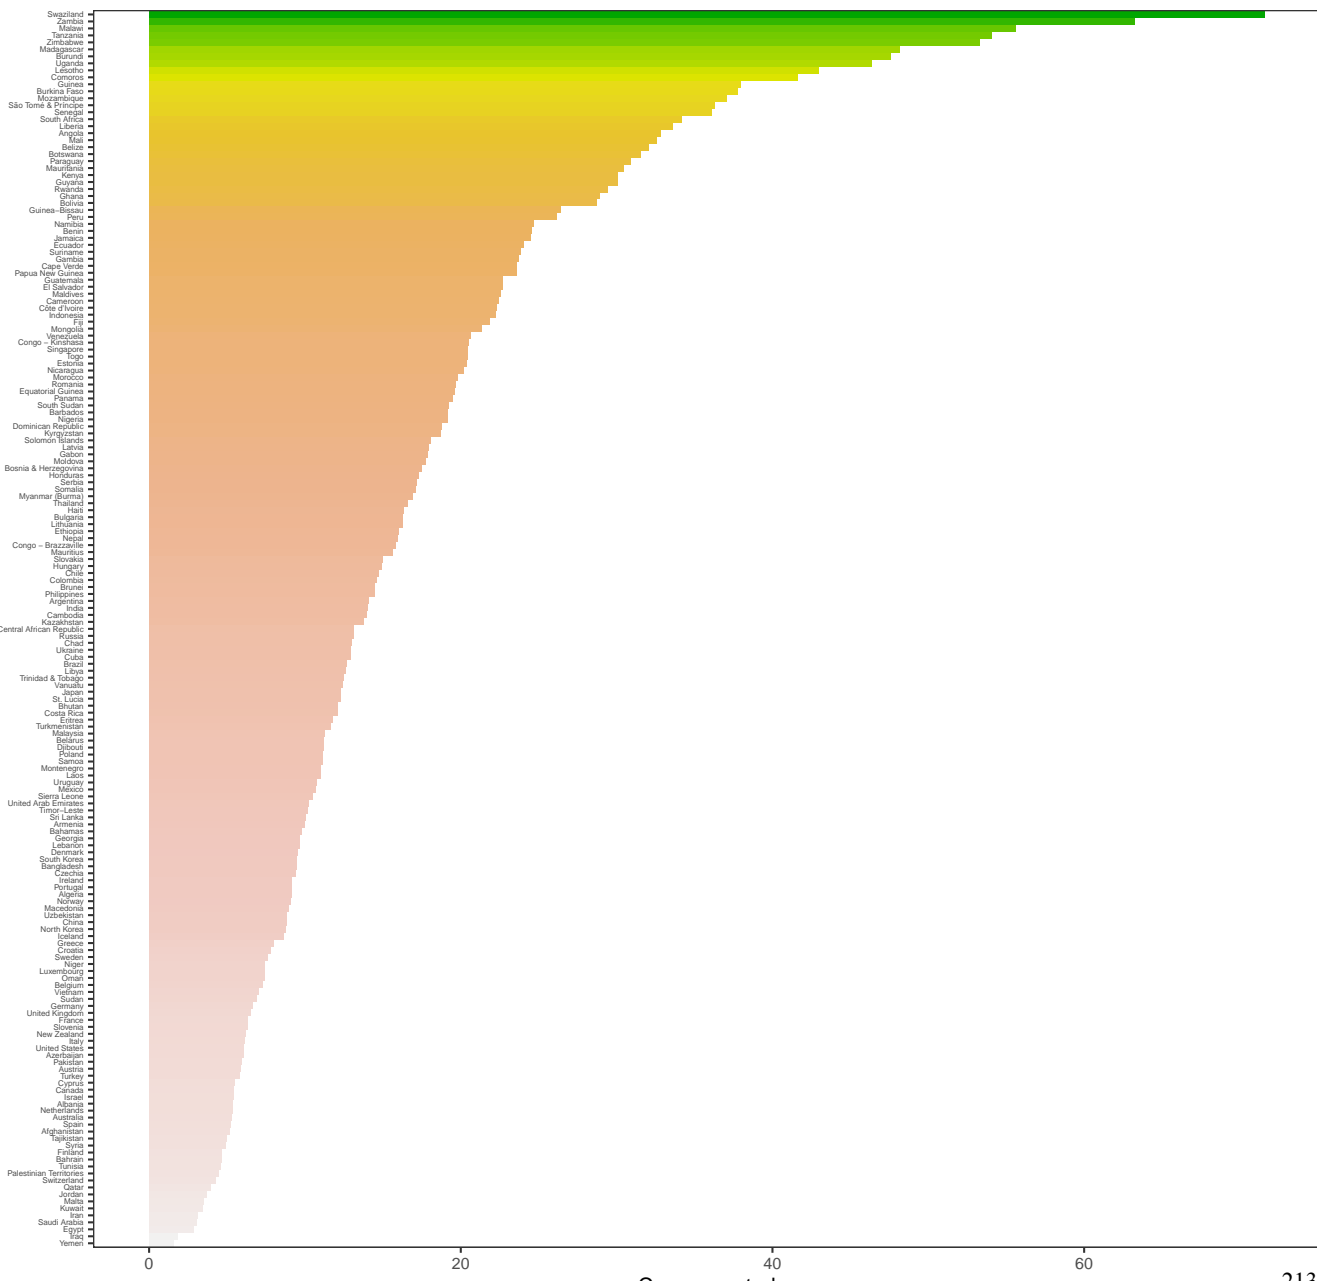

Cases averted

213

# Deaths averted per 1000 vaccinated girls (vaccination age = 9 years / bivalent/quadrivalent vaccine)

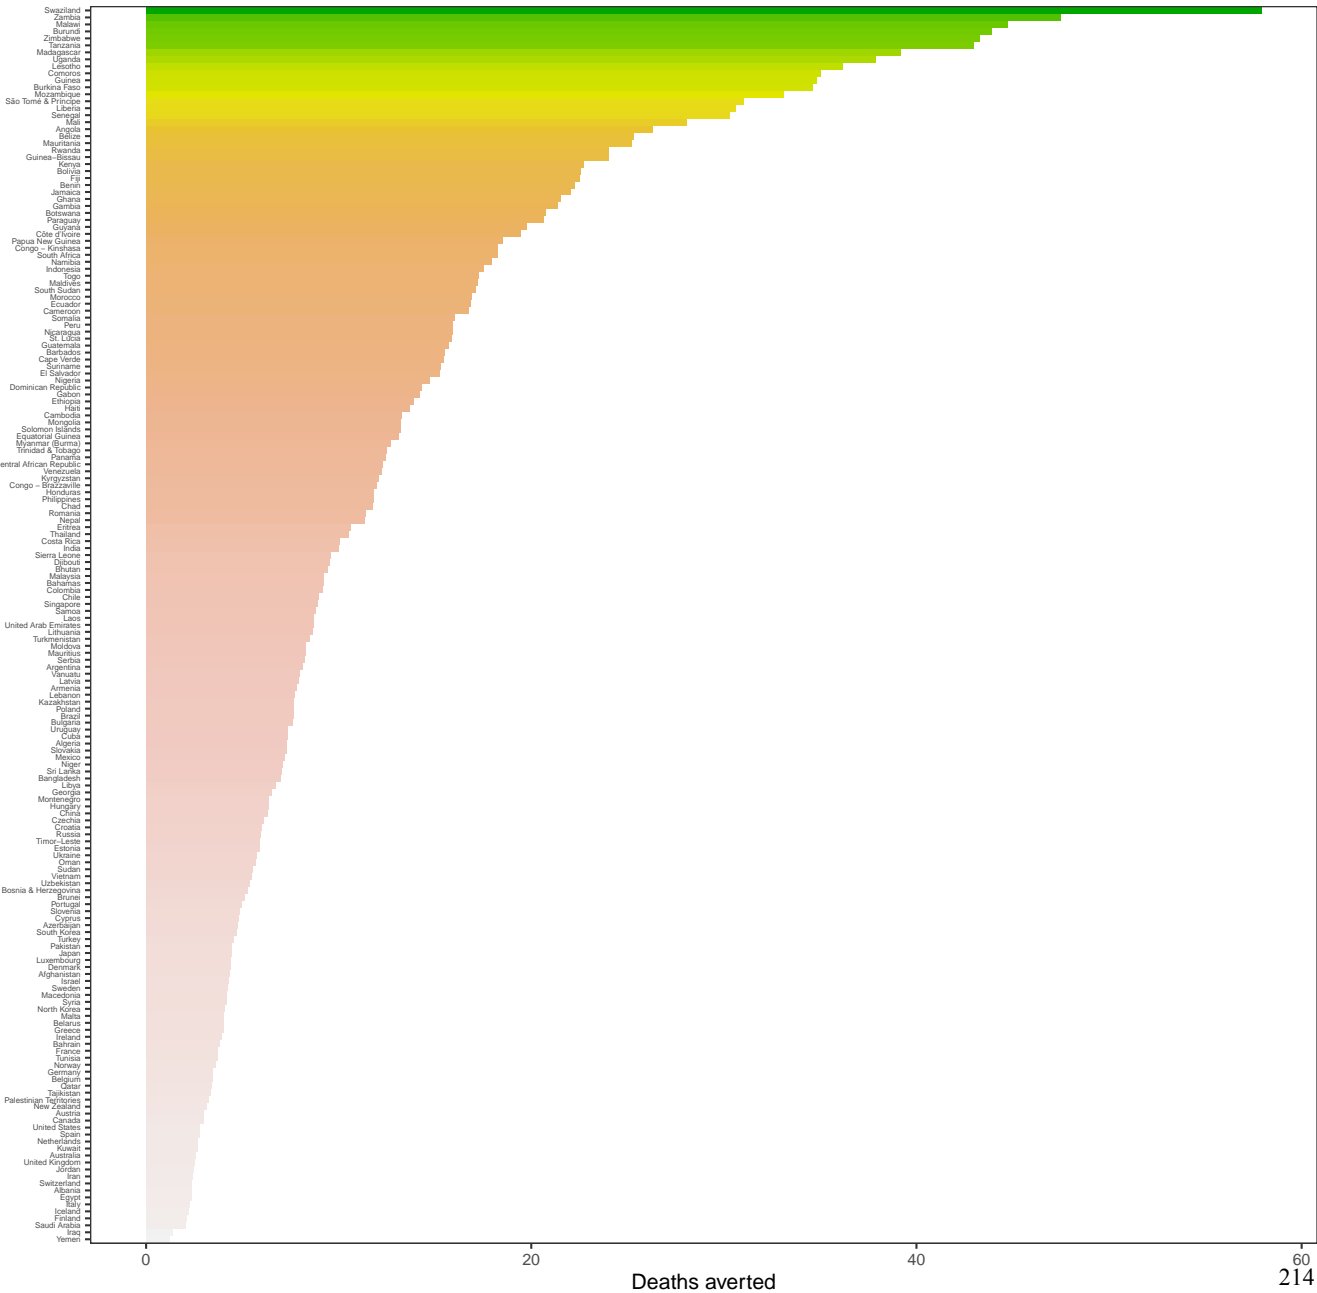

# YLDs averted per 1000 vaccinated girls (vaccination age = 9 years / bivalent/quadrivalent vaccine)

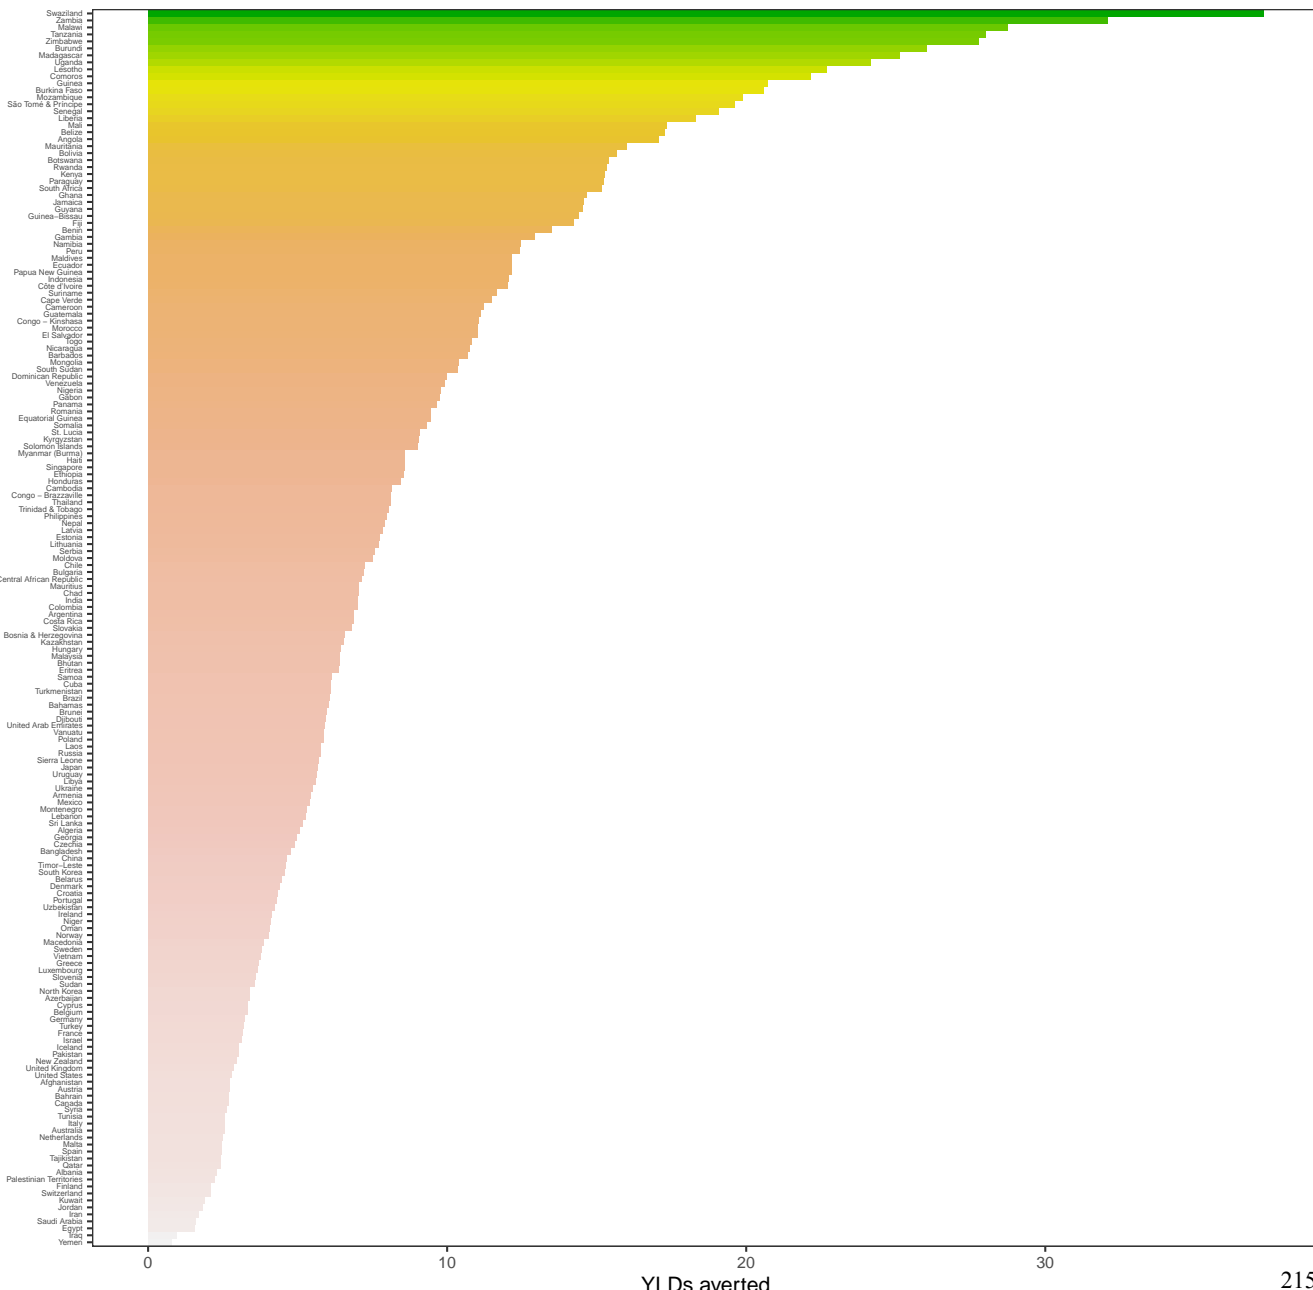

# YLLs averted per 1000 vaccinated girls (vaccination age = 9 years / bivalent/quadrivalent vaccine)

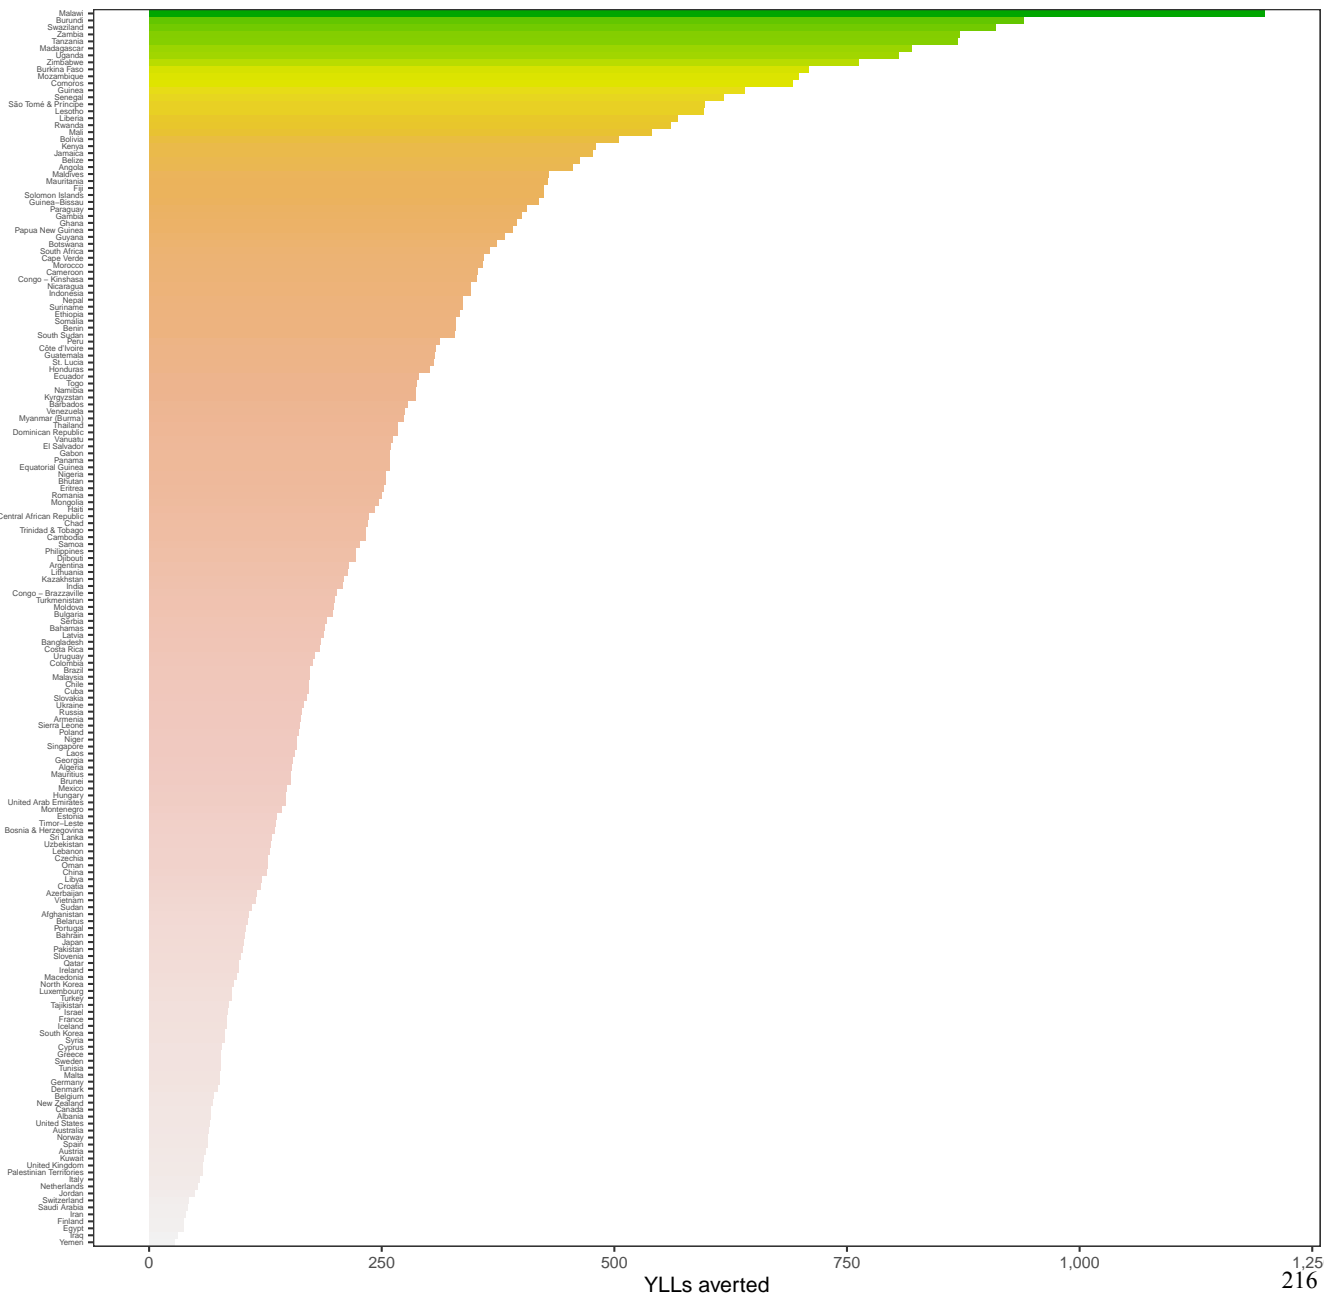

YLLs averted

1,250  
216

# DALYs averted per 1000 vaccinated girls (vaccination age = 9 years / bivalent/quadrivalent vaccine)

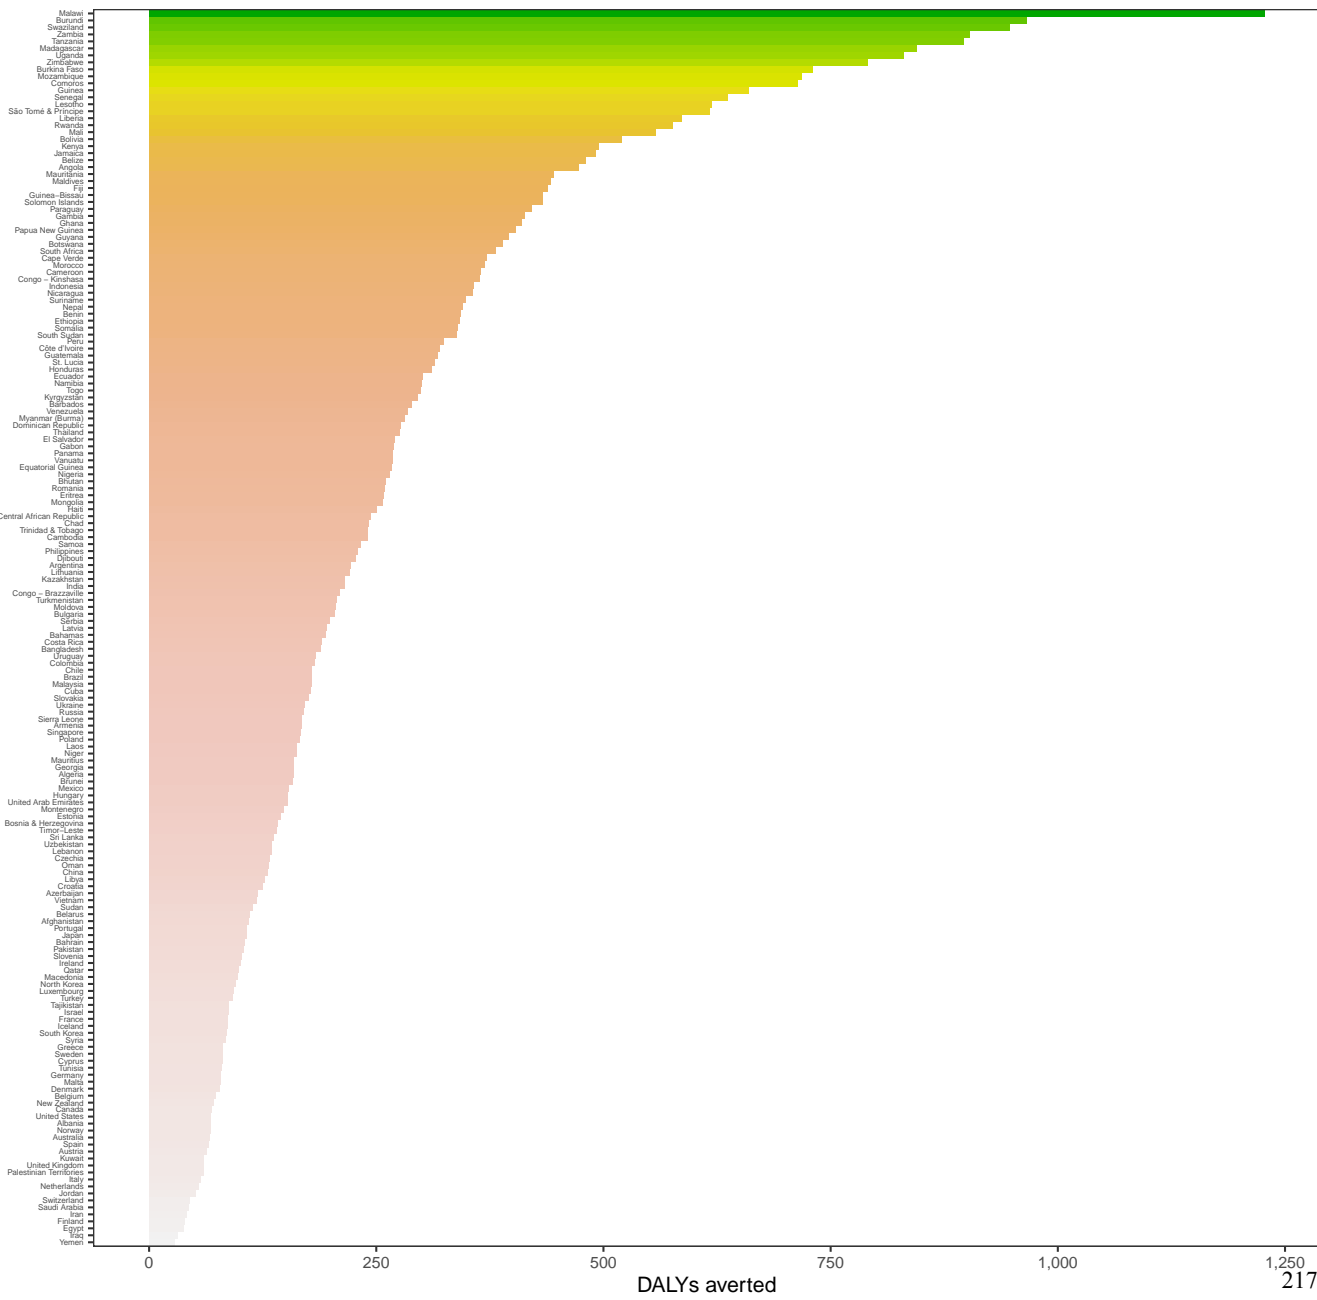

DALYs averted

1,250

217



# Cases averted per 1000 vaccinated girls (vaccination age = 9 years / nonavalent vaccine)

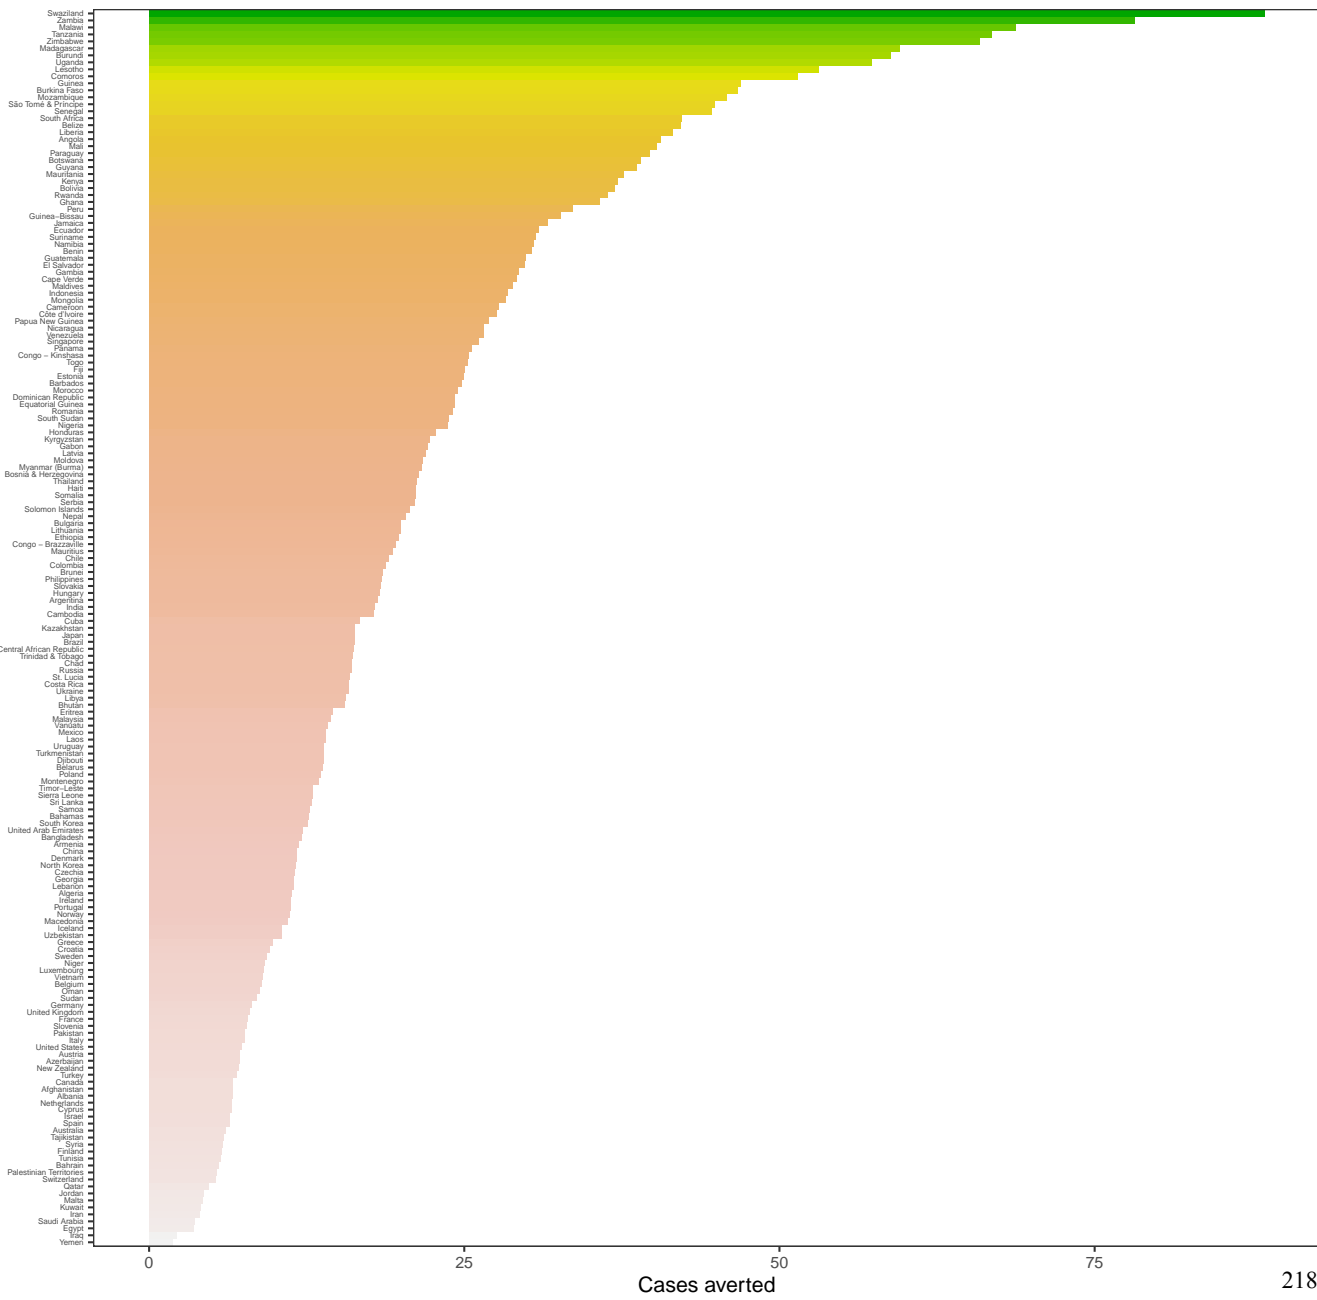

# Deaths averted per 1000 vaccinated girls (vaccination age = 9 years / nonavalent vaccine)

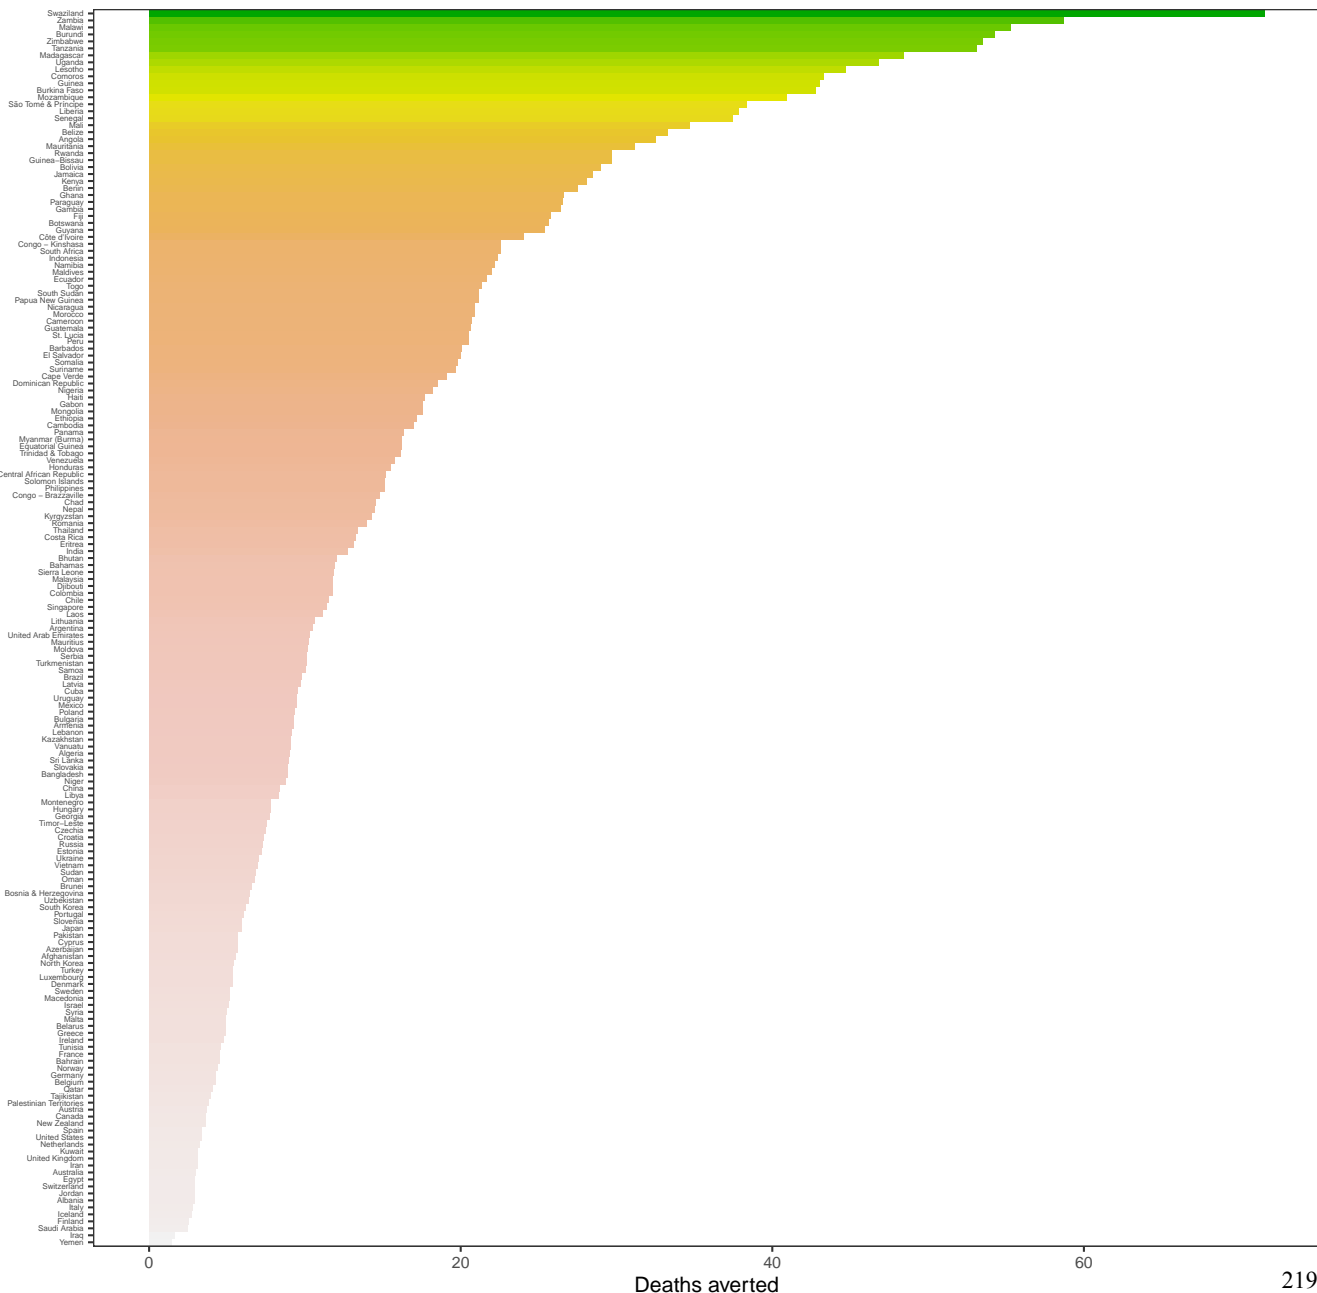

Deaths averted

219

# YLDs averted per 1000 vaccinated girls (vaccination age = 9 years / nonavalent vaccine)

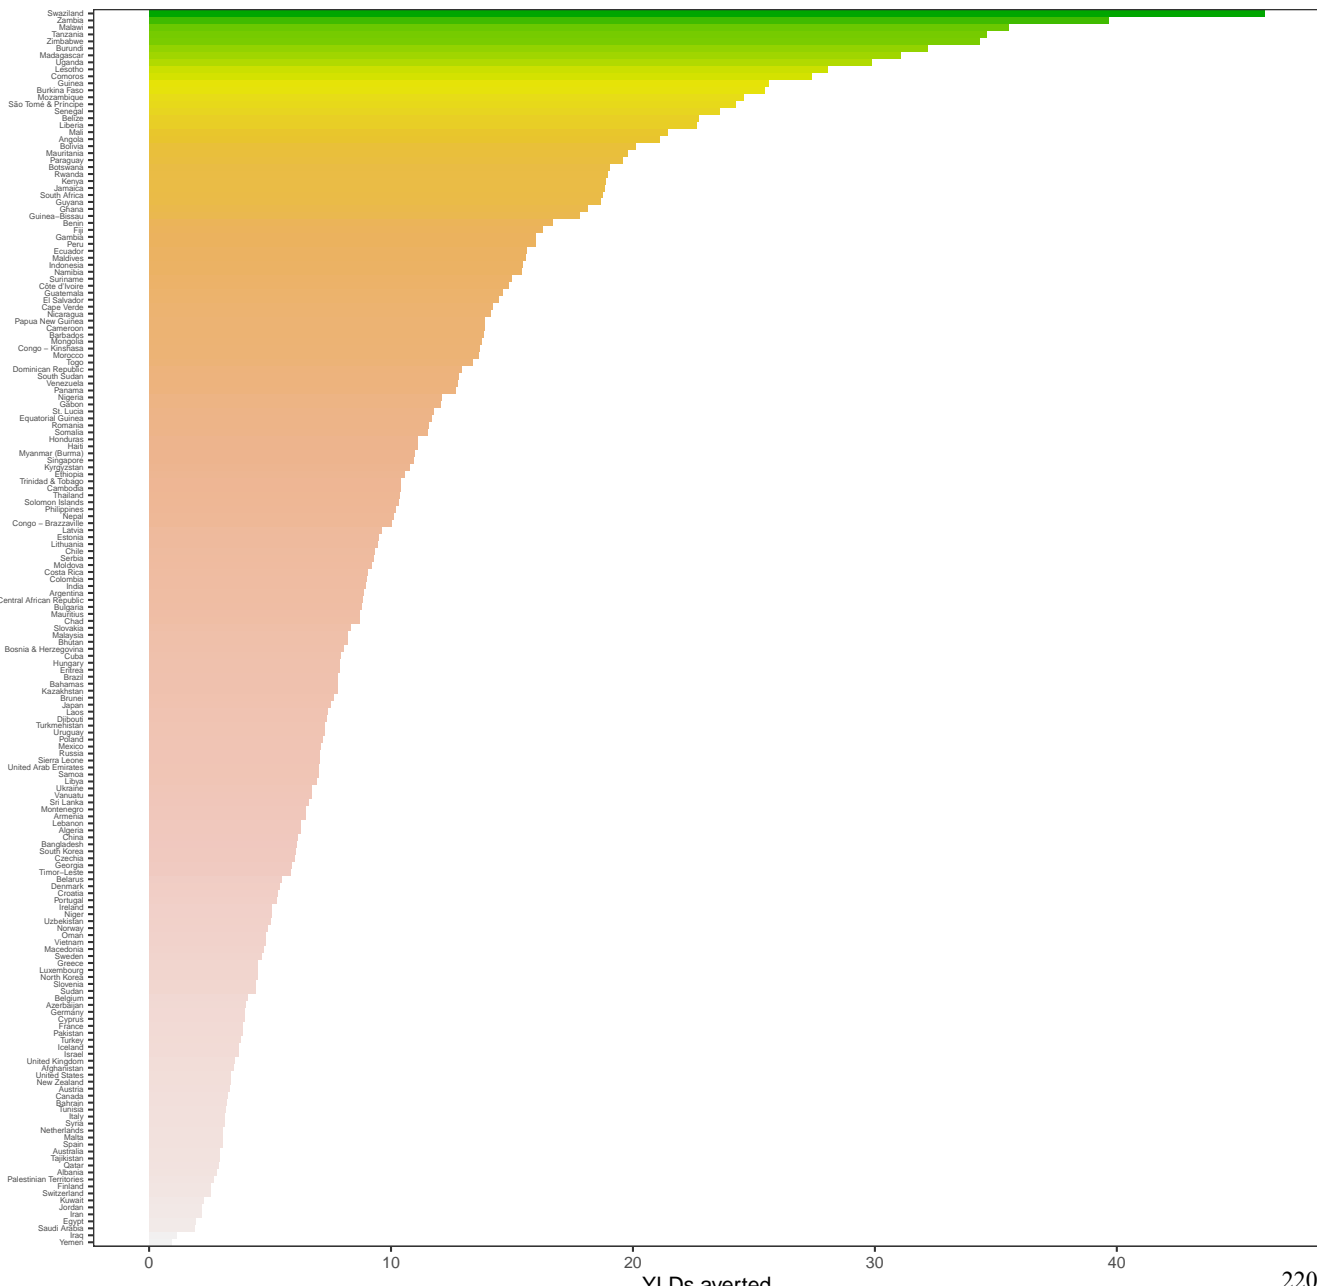

# YLLs averted per 1000 vaccinated girls (vaccination age = 9 years / nonavalent vaccine)

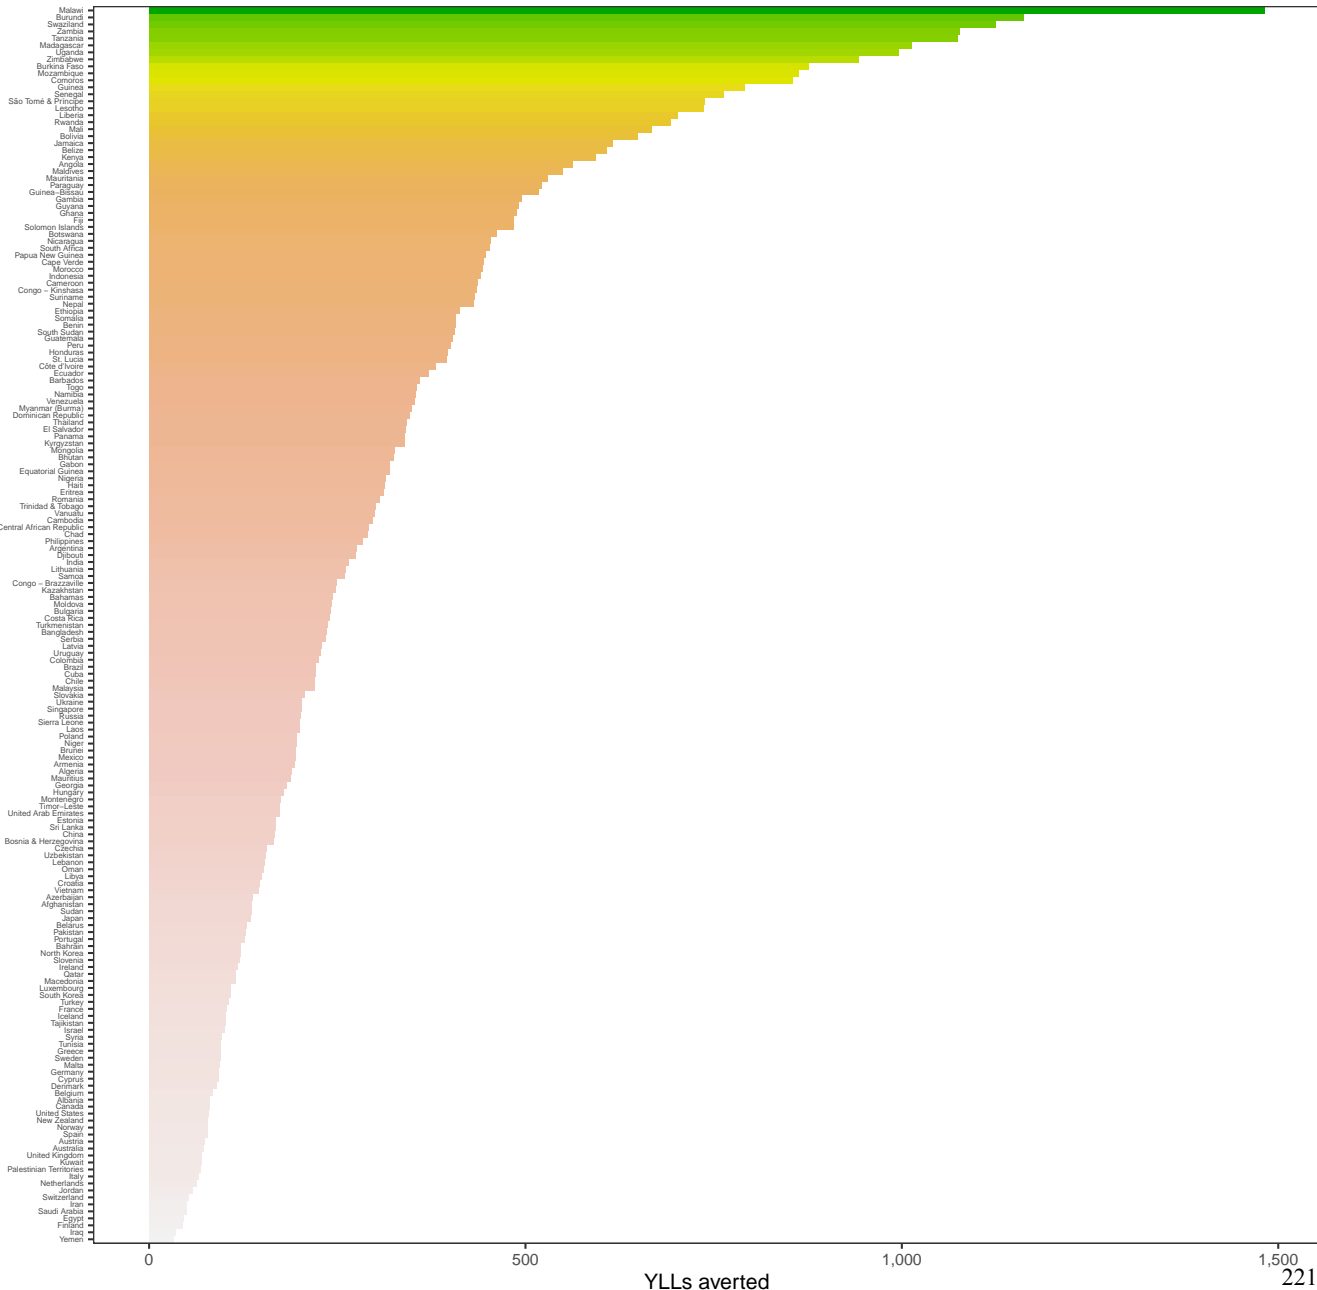

YLLs averted

221

# DALYs averted per 1000 vaccinated girls (vaccination age = 9 years / nonavalent vaccine)

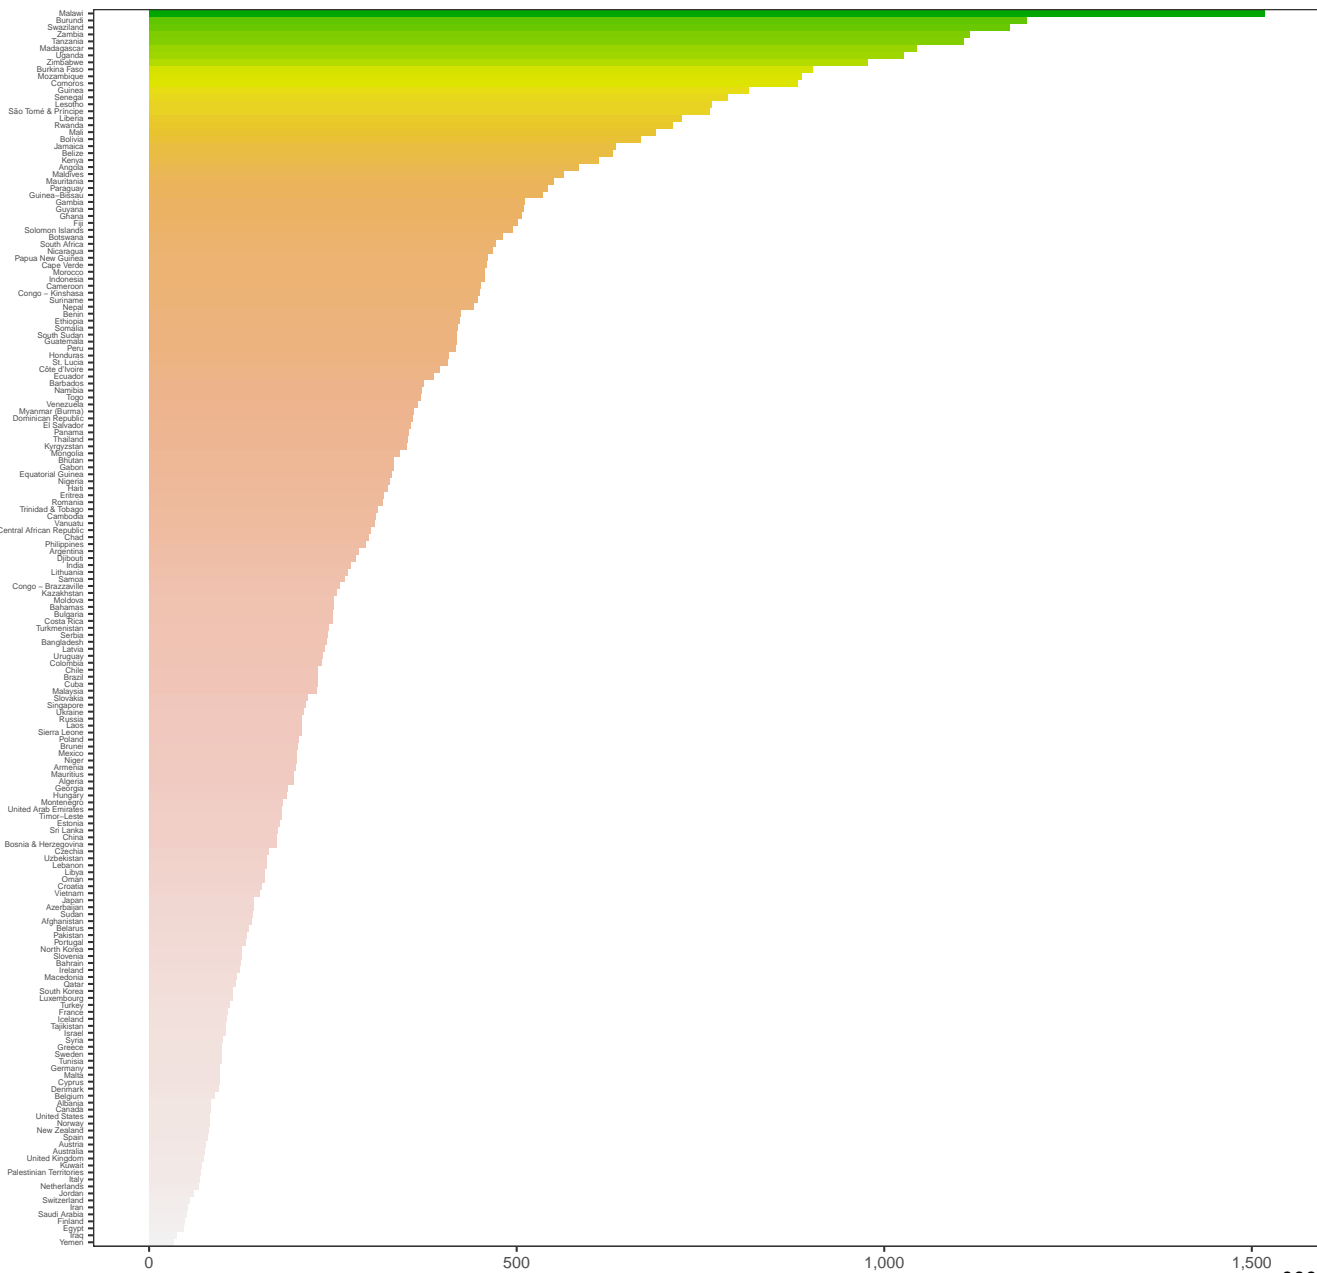

DALYs averted

# Cases averted per 1000 vaccinated girls (vaccination age = 12 years / bivalent/quadrivalent vaccine)

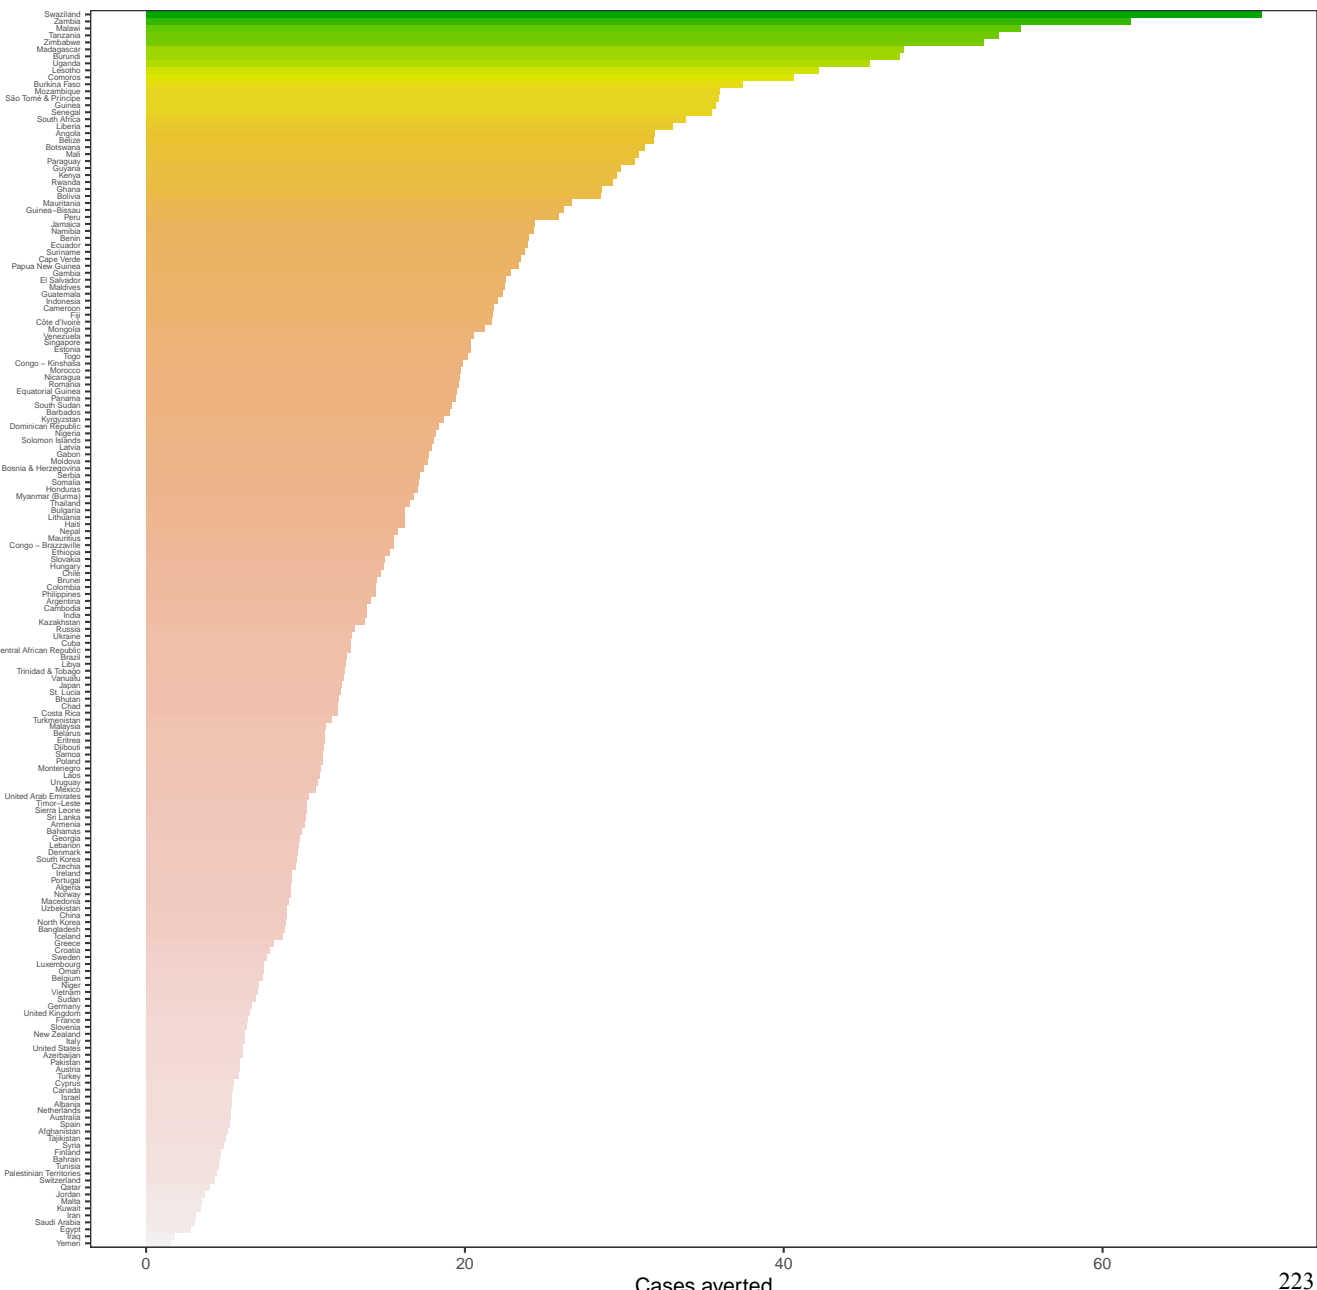

# Deaths averted per 1000 vaccinated girls (vaccination age = 12 years / bivalent/quadrivalent vaccine)

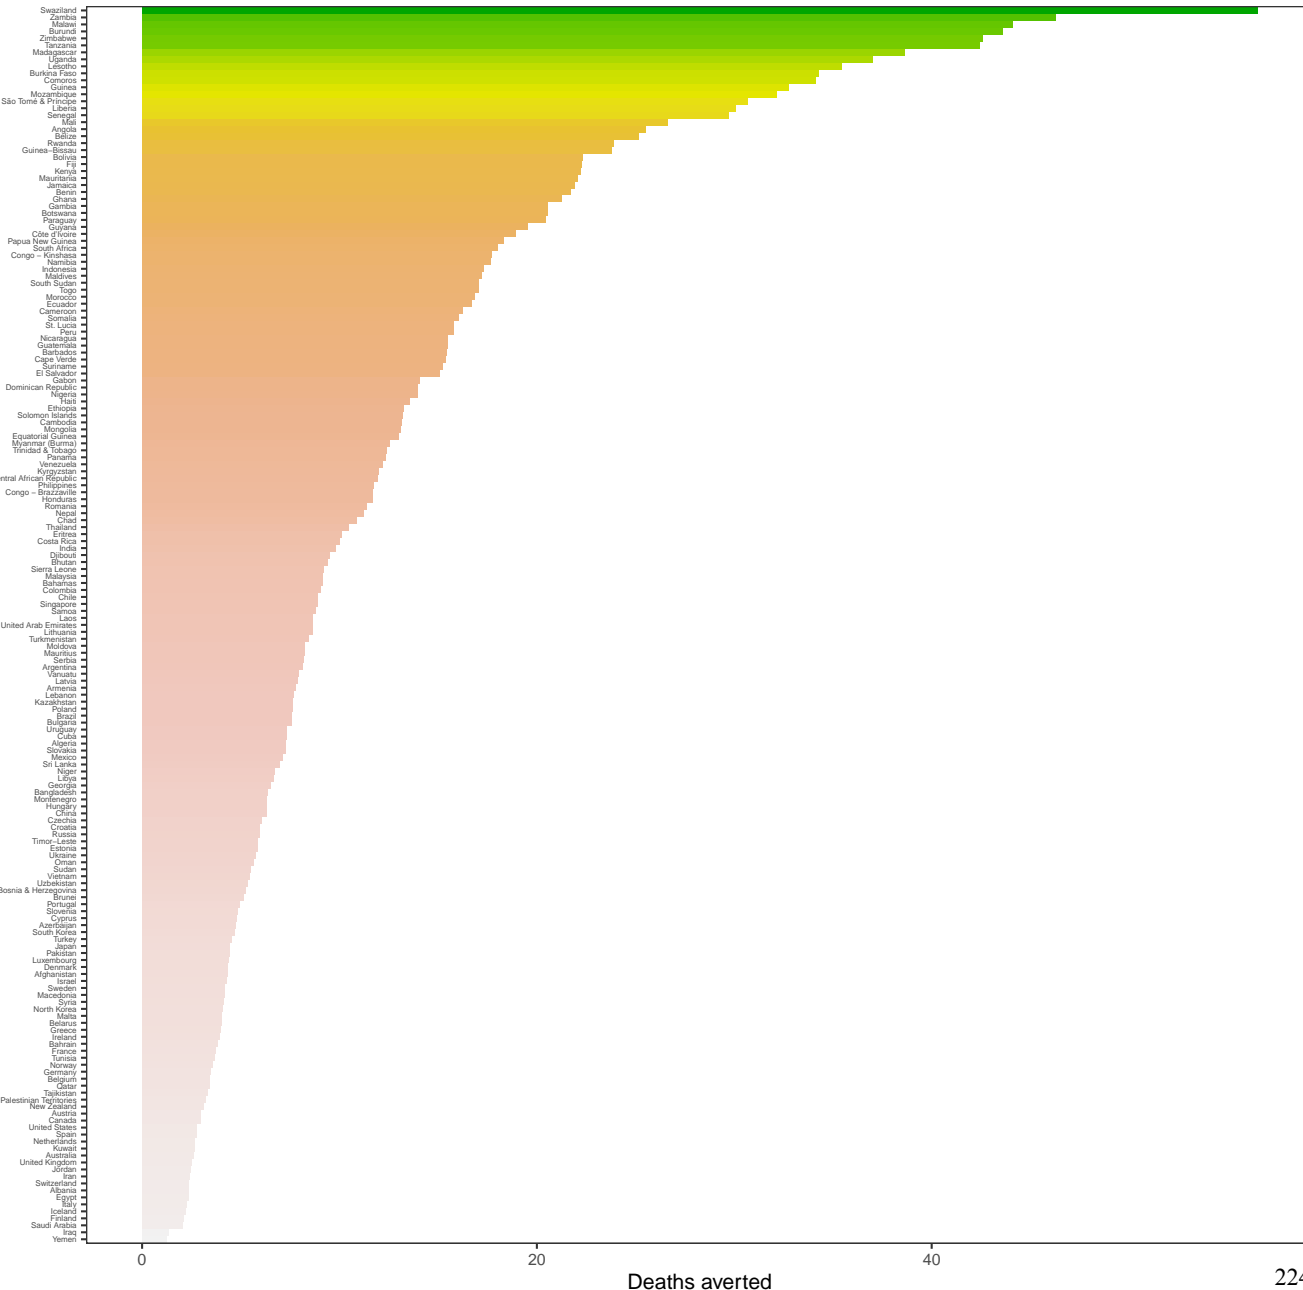

# YLDs averted per 1000 vaccinated girls (vaccination age = 12 years / bivalent/quadrivalent vaccine)

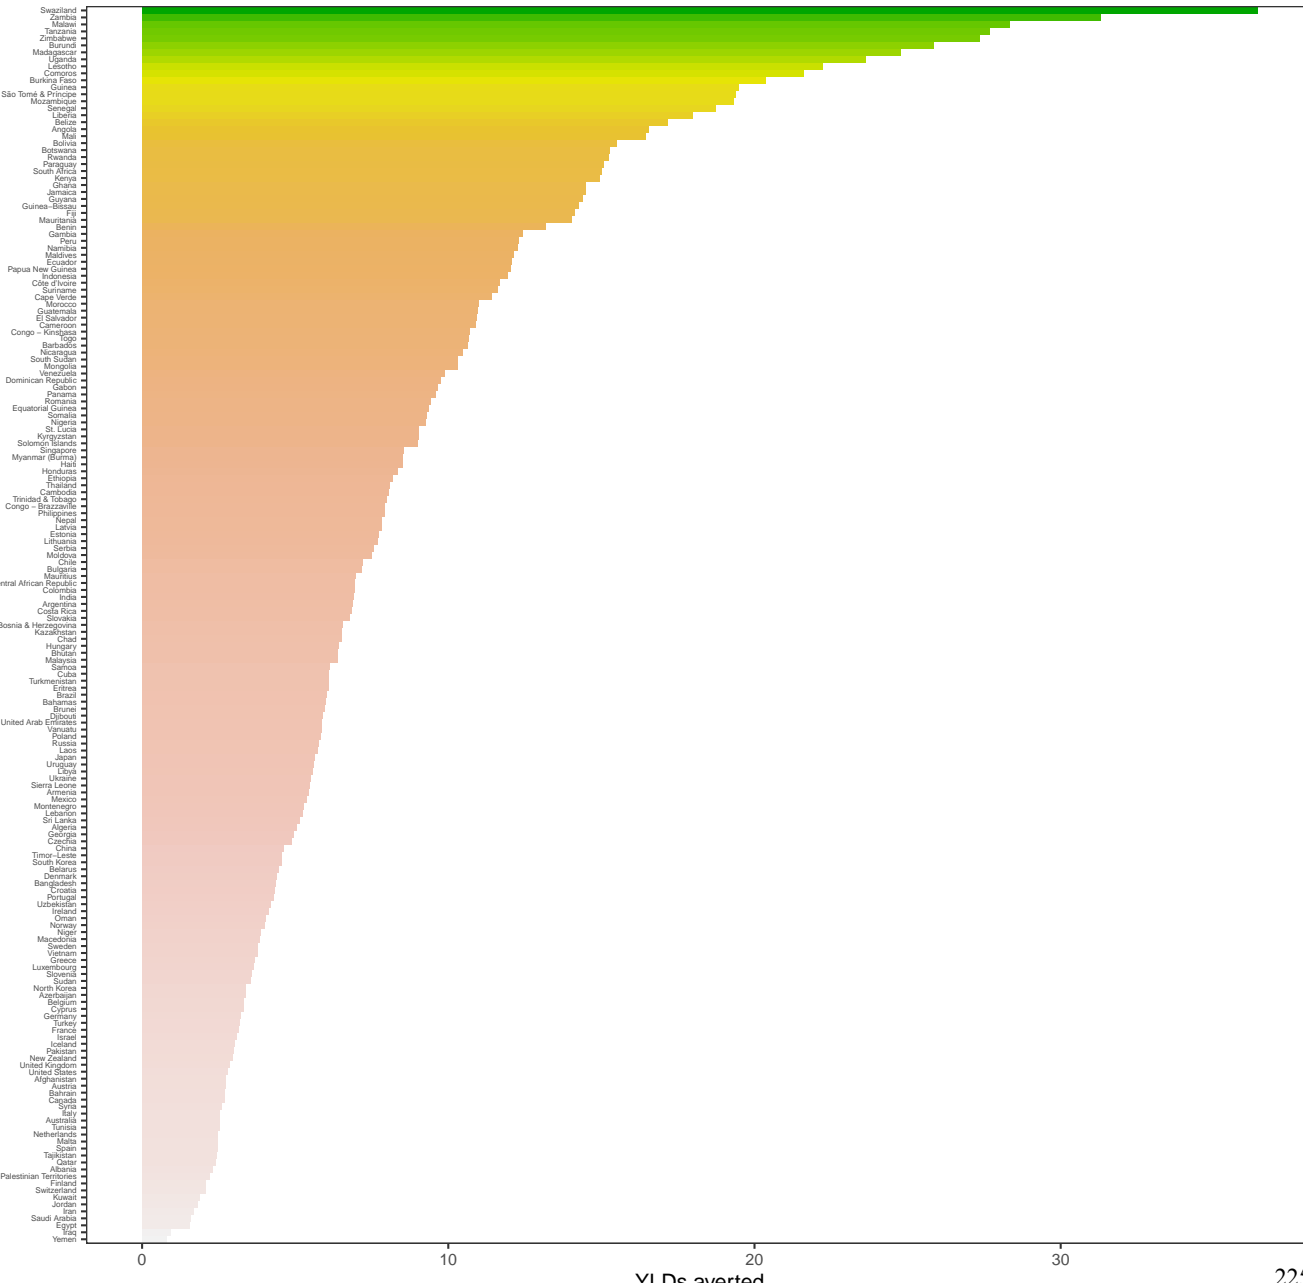



# YLLs averted per 1000 vaccinated girls (vaccination age = 12 years / bivalent/quadrivalent vaccine)

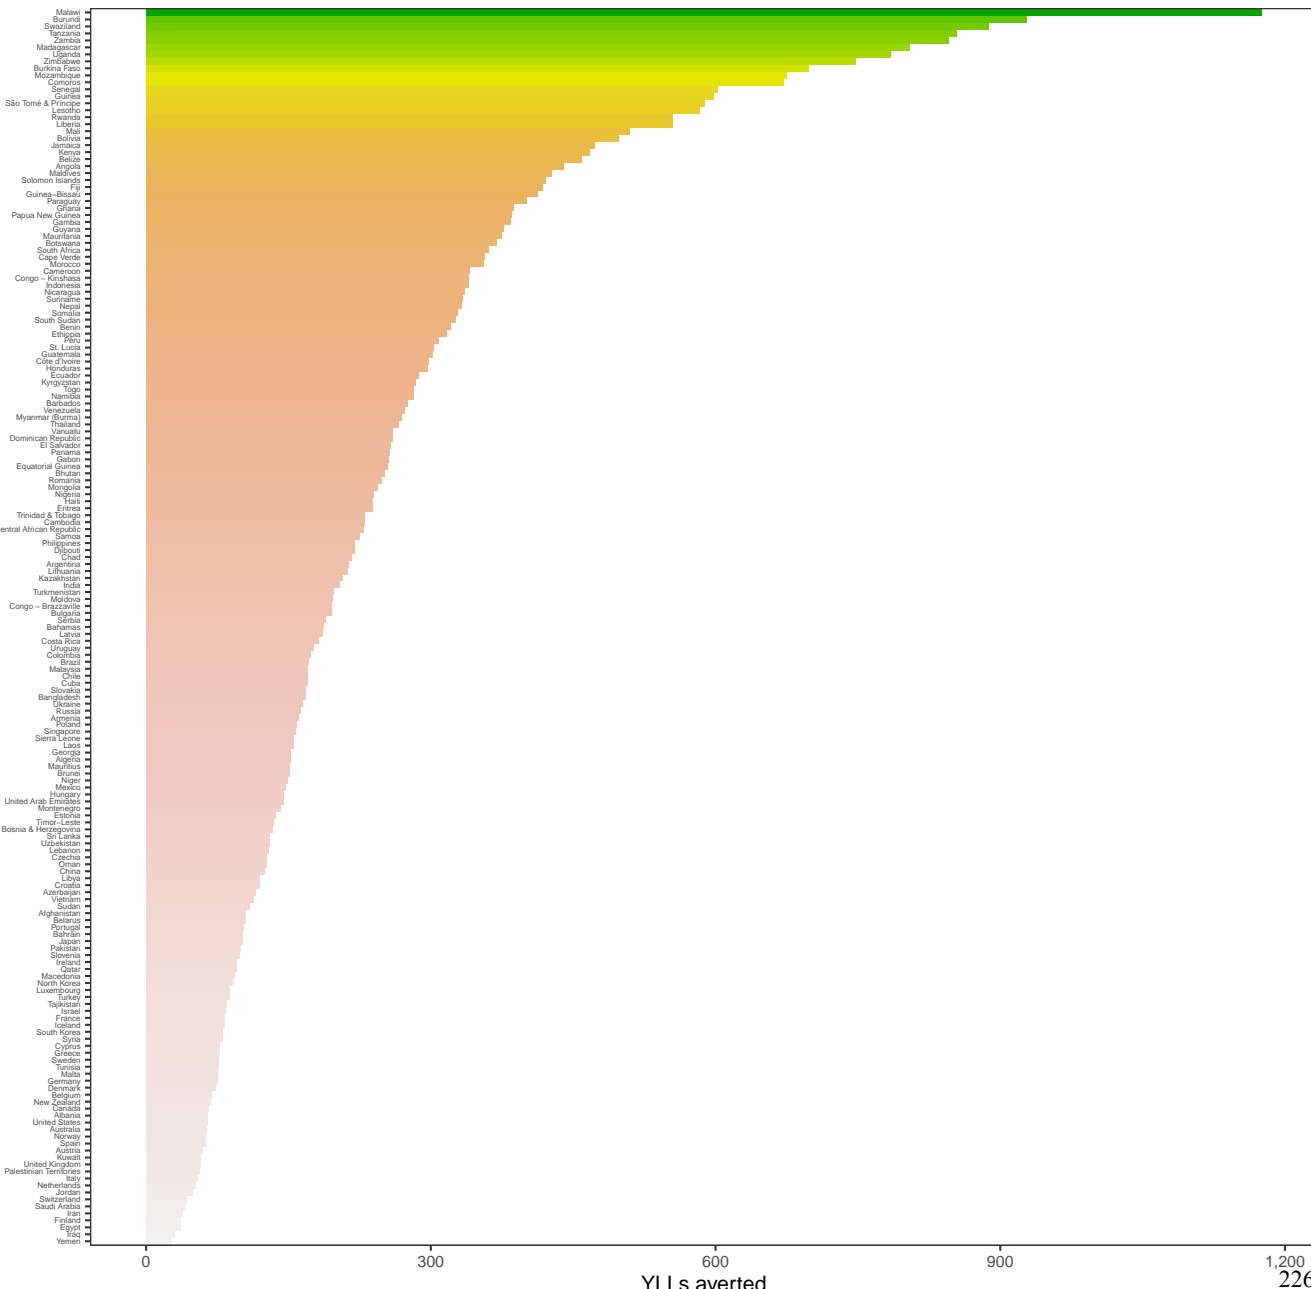

# DALYs averted per 1000 vaccinated girls (vaccination age = 12 years / bivalent/quadrivalent vaccine)

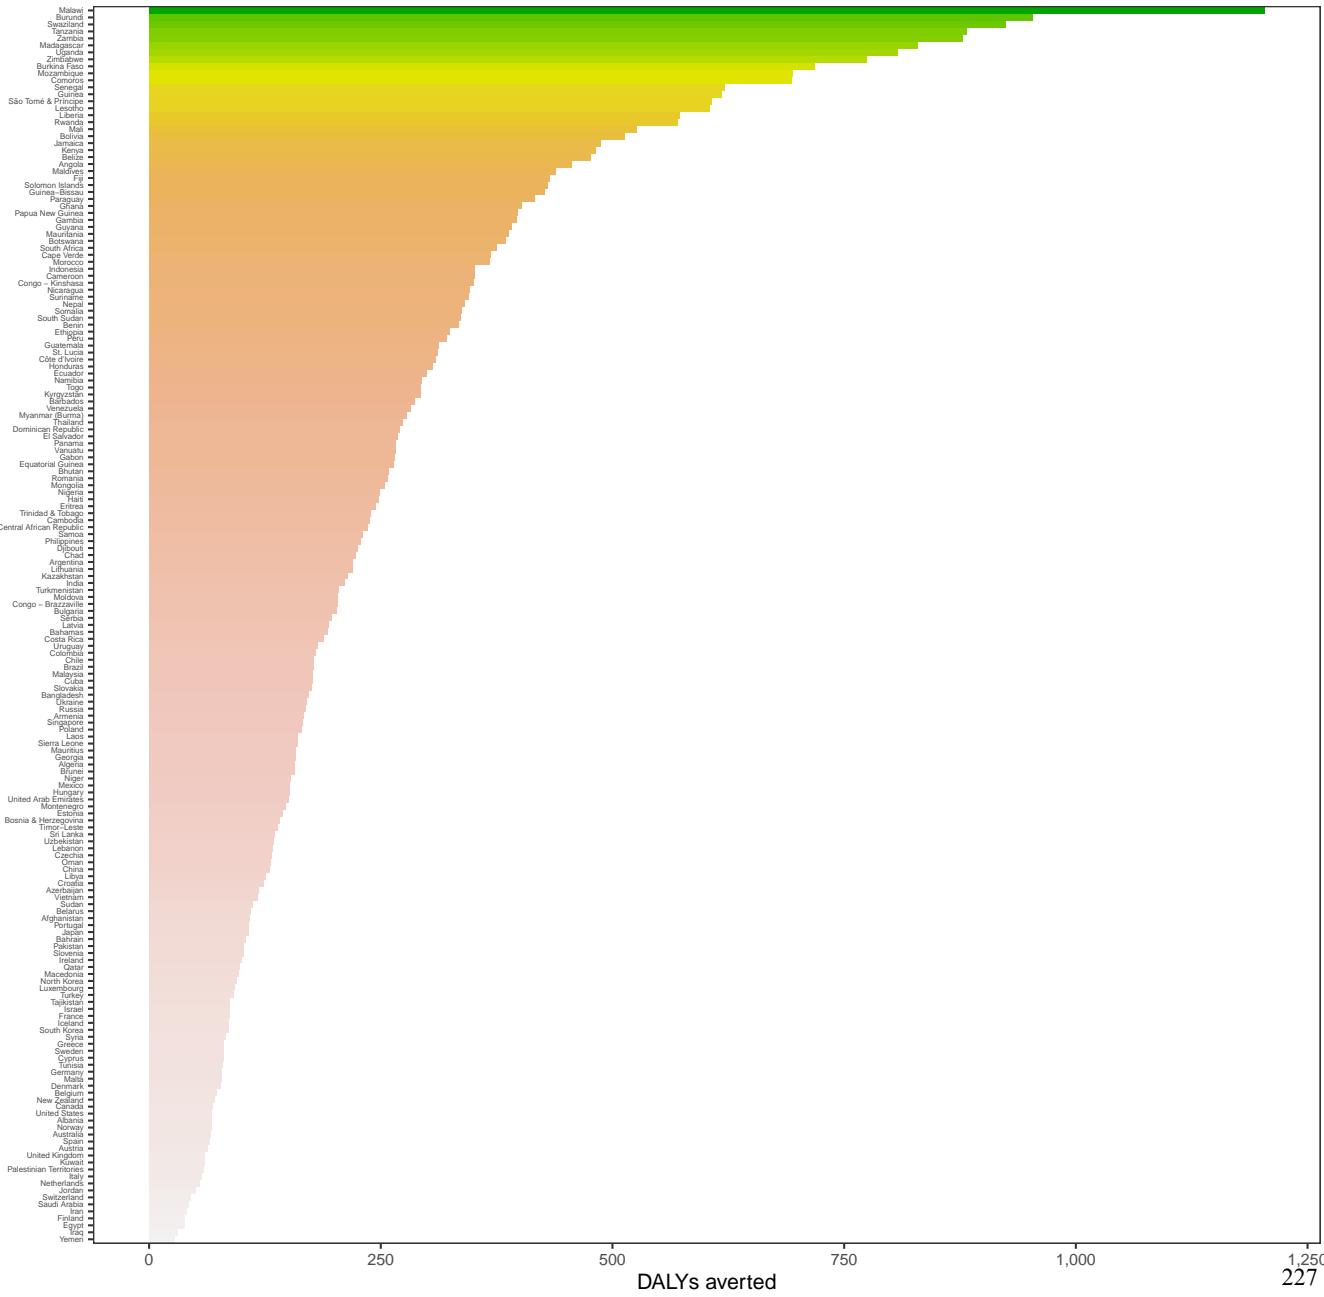

# Cases averted per 1000 vaccinated girls (vaccination age = 12 years / nonavalent vaccine)

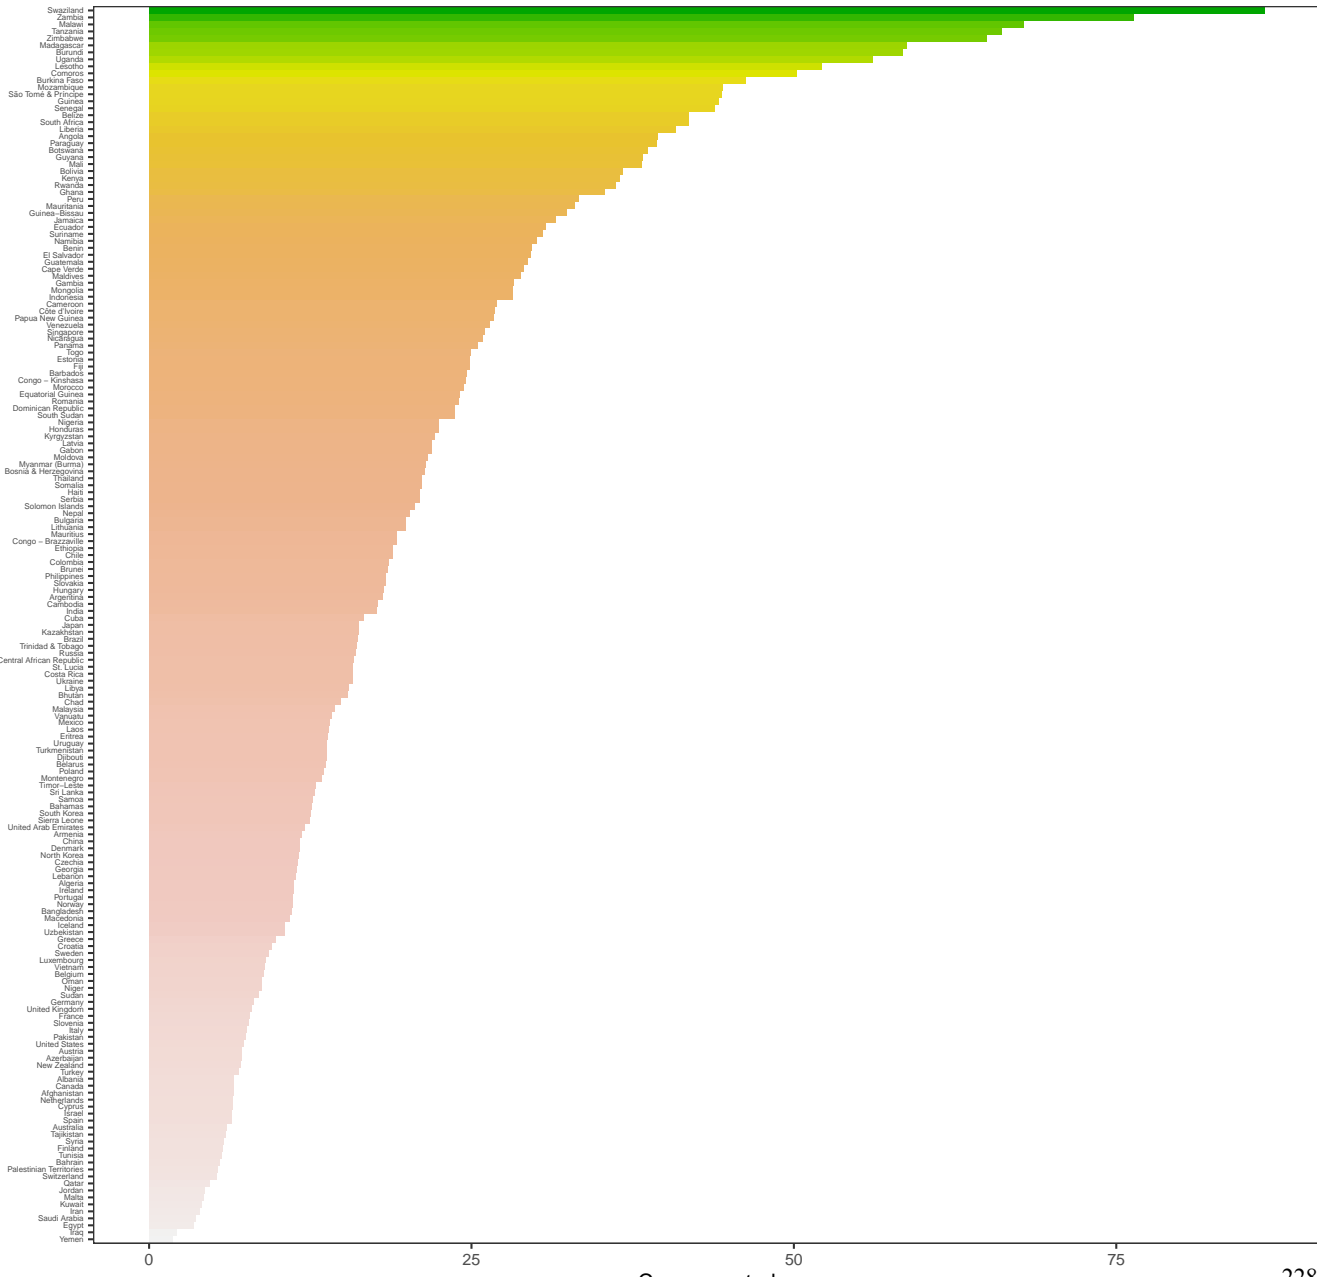

Cases averted

228

# Deaths averted per 1000 vaccinated girls (vaccination age = 12 years / nonavalent vaccine)

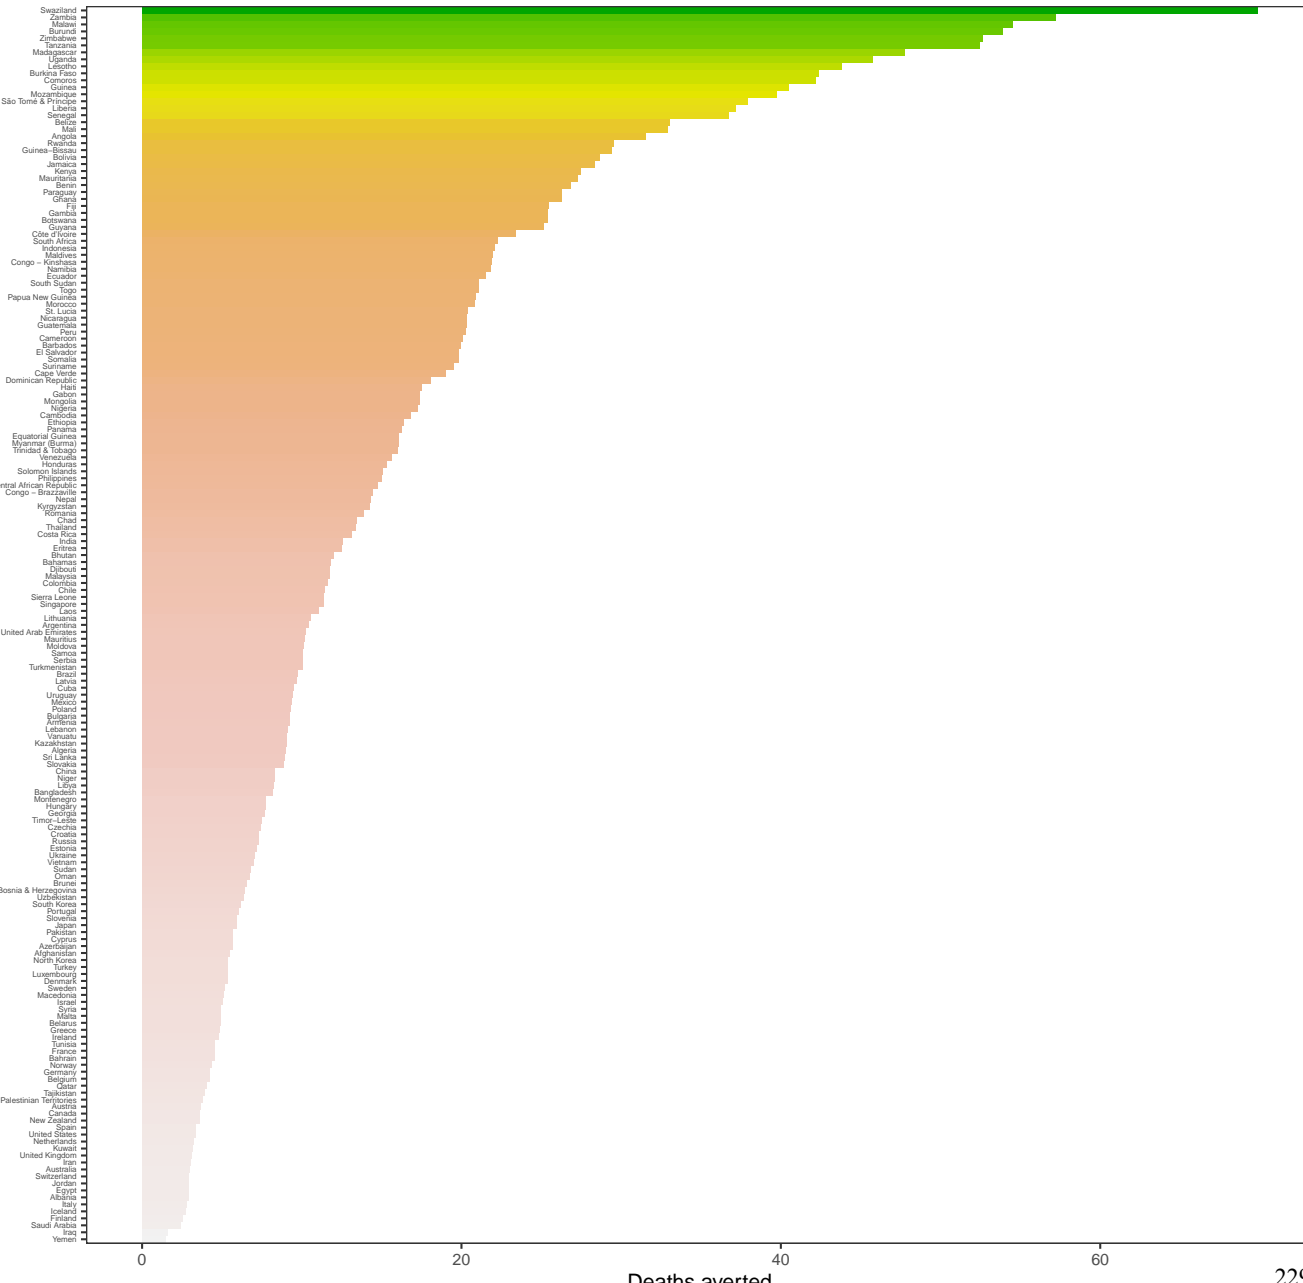



# YLLs averted per 1000 vaccinated girls (vaccination age = 12 years / nonavalent vaccine)

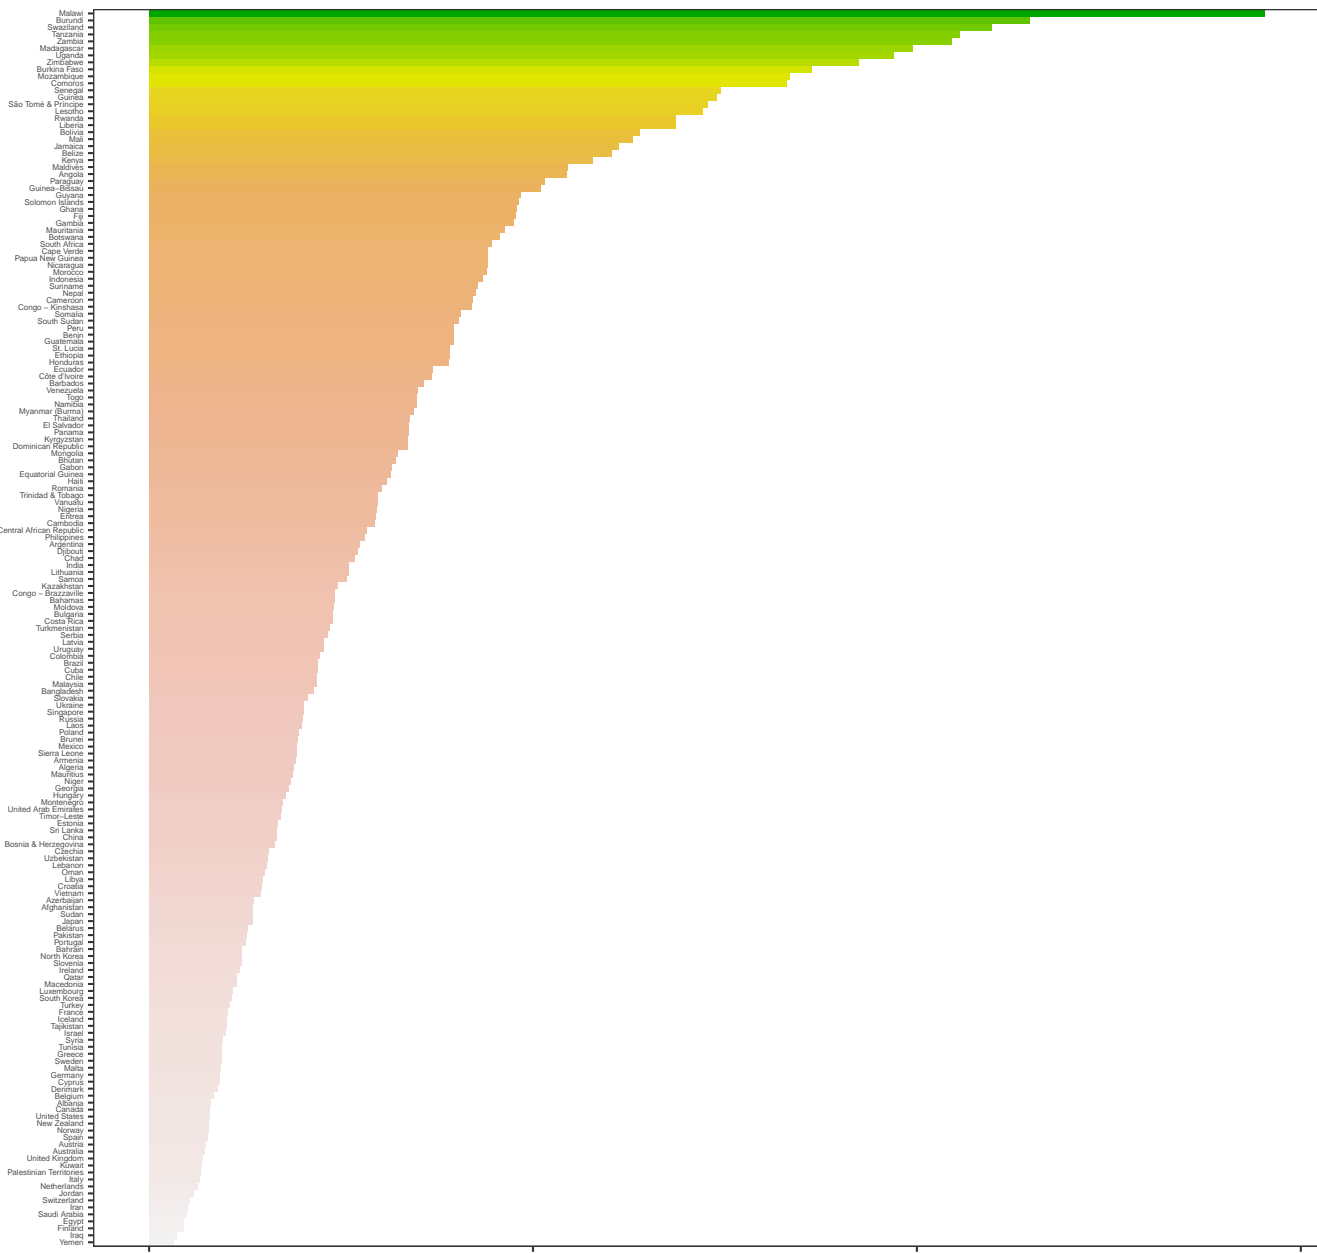

YLLs averted

1,500  
231

# DALYs averted per 1000 vaccinated girls (vaccination age = 12 years / nonavalent vaccine)

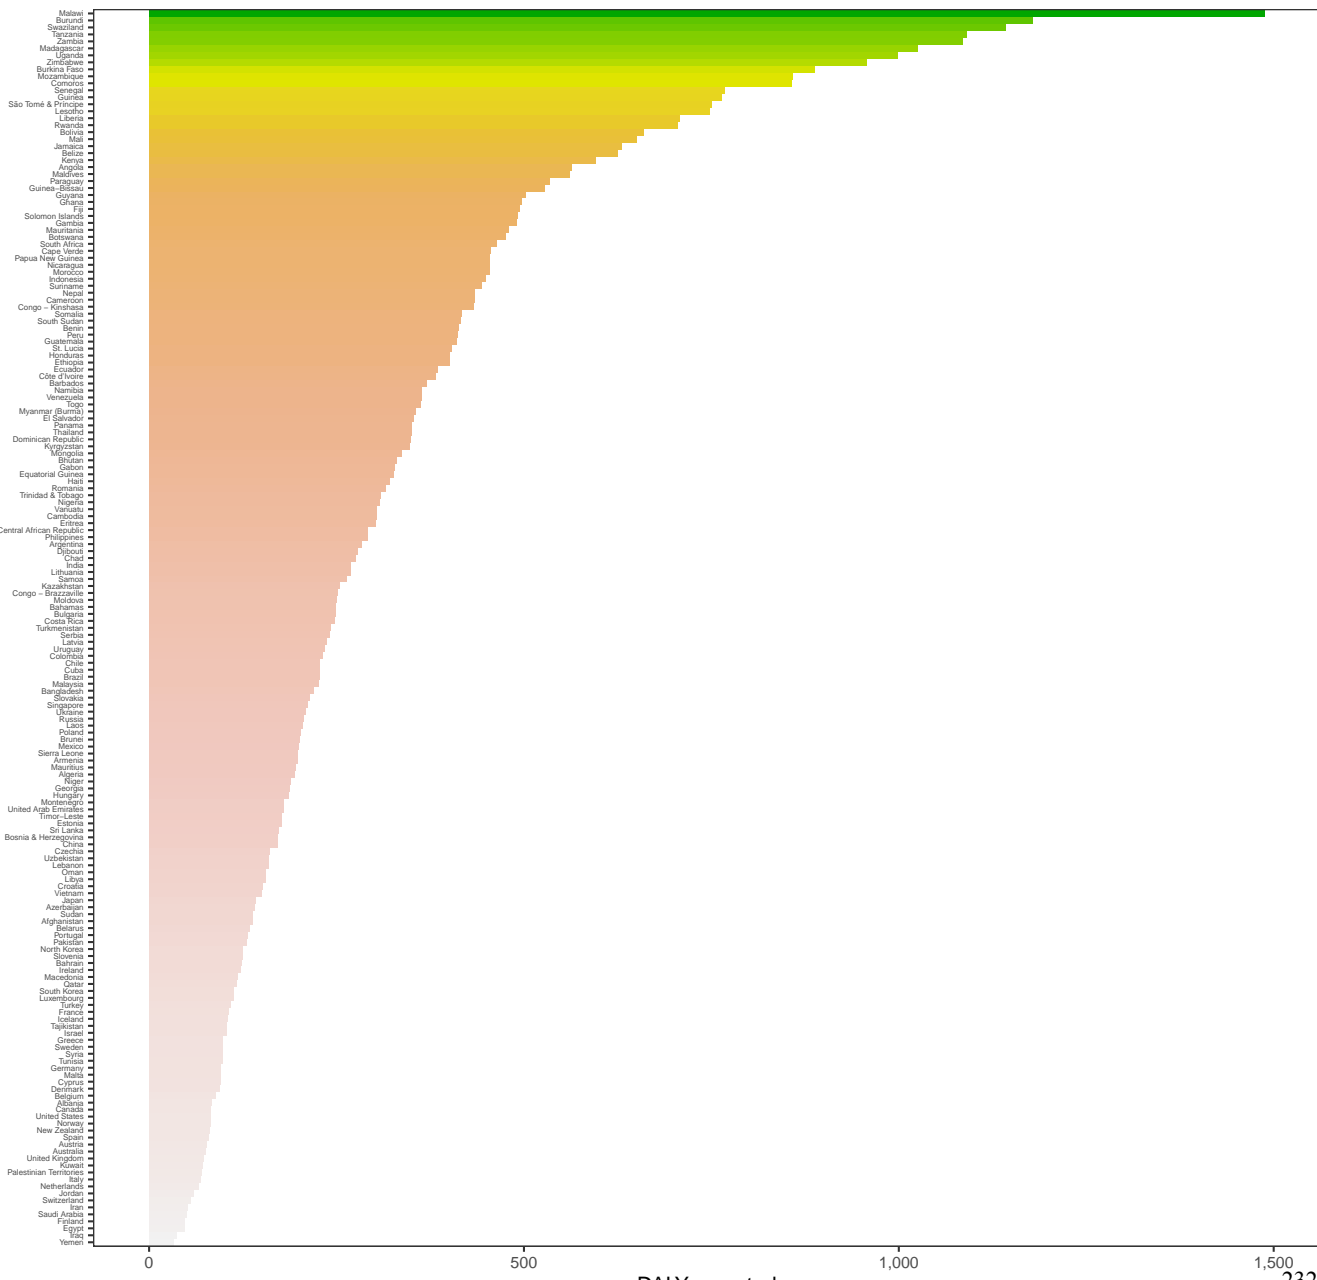

DALYs averted

## A18. National estimates of HPV vaccination impact

Lifetime health impact of HPV vaccination at 90% coverage during 2020-2029 on cases, deaths, YLLs, YLDs and DALYs averted per 1000 vaccinated girls in 177 countries for bivalent/quadrivalent and nonavalent vaccination of 9-year-old and 12-year-old girls (estimates after the combined PRIME updates for demography, disability weights and cervical cancer burden).

|             | Cervical cancer burden averted per 1000 vaccinated girls |        |      |      |       |                    |        |      |      |       |                                      |        |      |      |       |                    |        |      |      |       |
|-------------|----------------------------------------------------------|--------|------|------|-------|--------------------|--------|------|------|-------|--------------------------------------|--------|------|------|-------|--------------------|--------|------|------|-------|
|             | HPV vaccination of 9-year-old girls                      |        |      |      |       |                    |        |      |      |       | HPV vaccination of 12-year-old girls |        |      |      |       |                    |        |      |      |       |
|             | Bivalent / quadrivalent vaccine                          |        |      |      |       | Nonavalent vaccine |        |      |      |       | Bivalent / quadrivalent vaccine      |        |      |      |       | Nonavalent vaccine |        |      |      |       |
|             | Cases                                                    | Deaths | YLLs | YLDs | DALYs | Cases              | Deaths | YLLs | YLDs | DALYs | Cases                                | Deaths | YLLs | YLDs | DALYs | Cases              | Deaths | YLLs | YLDs | DALYs |
| Country     | averted per 1000 vaccinated girls                        |        |      |      |       |                    |        |      |      |       |                                      |        |      |      |       |                    |        |      |      |       |
| Afghanistan | 5                                                        | 4      | 3    | 106  | 109   | 7                  | 6      | 3    | 136  | 140   | 5                                    | 4      | 3    | 105  | 108   | 7                  | 6      | 3    | 135  | 138   |
| Albania     | 5                                                        | 2      | 2    | 66   | 68    | 7                  | 3      | 3    | 80   | 83    | 5                                    | 2      | 2    | 65   | 68    | 7                  | 3      | 3    | 80   | 83    |
| Algeria     | 9                                                        | 7      | 5    | 154  | 159   | 11                 | 9      | 6    | 190  | 196   | 9                                    | 7      | 5    | 152  | 157   | 11                 | 9      | 6    | 188  | 195   |
| Angola      | 33                                                       | 26     | 17   | 455  | 473   | 41                 | 33     | 21   | 563  | 584   | 32                                   | 26     | 17   | 440  | 456   | 39                 | 32     | 20   | 544  | 564   |
| Argentina   | 14                                                       | 8      | 7    | 214  | 221   | 18                 | 10     | 9    | 276  | 285   | 14                                   | 8      | 7    | 213  | 220   | 18                 | 10     | 9    | 274  | 283   |
| Armenia     | 10                                                       | 8      | 5    | 162  | 168   | 12                 | 9      | 6    | 193  | 199   | 10                                   | 8      | 5    | 161  | 166   | 12                 | 9      | 6    | 191  | 198   |
| Australia   | 5                                                        | 3      | 3    | 64   | 66    | 6                  | 3      | 3    | 73   | 76    | 5                                    | 3      | 3    | 64   | 66    | 6                  | 3      | 3    | 73   | 76    |
| Austria     | 6                                                        | 3      | 3    | 60   | 63    | 7                  | 4      | 3    | 74   | 77    | 6                                    | 3      | 3    | 60   | 63    | 7                  | 4      | 3    | 73   | 77    |
| Azerbaijan  | 6                                                        | 5      | 3    | 116  | 119   | 7                  | 6      | 4    | 138  | 142   | 6                                    | 5      | 3    | 115  | 118   | 7                  | 6      | 4    | 137  | 141   |
| Bahamas     | 10                                                       | 9      | 6    | 188  | 194   | 13                 | 12     | 8    | 244  | 251   | 10                                   | 9      | 6    | 186  | 192   | 13                 | 12     | 8    | 241  | 249   |
| Bahrain     | 5                                                        | 4      | 3    | 102  | 105   | 6                  | 5      | 3    | 121  | 125   | 5                                    | 4      | 3    | 101  | 104   | 6                  | 5      | 3    | 120  | 124   |
| Bangladesh  | 9                                                        | 7      | 5    | 184  | 189   | 12                 | 9      | 6    | 235  | 241   | 9                                    | 6      | 4    | 168  | 172   | 11                 | 8      | 6    | 214  | 220   |
| Barbados    | 19                                                       | 16     | 11   | 278  | 289   | 25                 | 20     | 14   | 360  | 374   | 19                                   | 15     | 11   | 276  | 287   | 25                 | 20     | 14   | 357  | 371   |
| Belarus     | 11                                                       | 4      | 4    | 106  | 110   | 14                 | 5      | 5    | 130  | 135   | 11                                   | 4      | 4    | 105  | 110   | 14                 | 5      | 5    | 129  | 134   |
| Belgium     | 7                                                        | 3      | 3    | 69   | 73    | 9                  | 4      | 4    | 85   | 89    | 7                                    | 3      | 3    | 69   | 72    | 9                  | 4      | 4    | 84   | 89    |
| Belize      | 32                                                       | 25     | 17   | 463  | 480   | 42                 | 33     | 23   | 608  | 631   | 32                                   | 25     | 17   | 459  | 476   | 42                 | 33     | 23   | 603  | 625   |



|                          |    |    |    |     |     |    |    |    |      |      |    |    |    |     |     |    |    |    |      |      |
|--------------------------|----|----|----|-----|-----|----|----|----|------|------|----|----|----|-----|-----|----|----|----|------|------|
| Benin                    | 25 | 22 | 13 | 329 | 343 | 30 | 28 | 17 | 407  | 424  | 24 | 22 | 13 | 320 | 334 | 30 | 27 | 16 | 396  | 412  |
| Bhutan                   | 12 | 9  | 6  | 254 | 260 | 15 | 12 | 8  | 325  | 333  | 12 | 9  | 6  | 252 | 258 | 15 | 12 | 8  | 322  | 330  |
| Bolivia                  | 29 | 23 | 16 | 505 | 520 | 37 | 29 | 20 | 649  | 669  | 29 | 22 | 16 | 497 | 513 | 37 | 29 | 20 | 639  | 659  |
| Bosnia & Herzegovina     | 17 | 5  | 7  | 135 | 141 | 21 | 6  | 8  | 165  | 173  | 17 | 5  | 7  | 134 | 140 | 21 | 6  | 8  | 164  | 172  |
| Botswana                 | 32 | 21 | 15 | 373 | 389 | 39 | 26 | 19 | 462  | 481  | 31 | 21 | 15 | 369 | 385 | 39 | 25 | 19 | 457  | 476  |
| Brazil                   | 13 | 8  | 6  | 172 | 178 | 16 | 10 | 8  | 222  | 229  | 13 | 8  | 6  | 171 | 177 | 16 | 10 | 8  | 220  | 228  |
| Brunei                   | 14 | 5  | 6  | 152 | 158 | 18 | 7  | 8  | 194  | 202  | 14 | 5  | 6  | 151 | 157 | 18 | 7  | 8  | 193  | 200  |
| Bulgaria                 | 16 | 8  | 7  | 197 | 204 | 20 | 9  | 9  | 241  | 250  | 16 | 8  | 7  | 196 | 203 | 20 | 9  | 9  | 239  | 248  |
| Burkina Faso             | 38 | 35 | 21 | 709 | 730 | 47 | 43 | 25 | 877  | 902  | 37 | 34 | 20 | 698 | 718 | 46 | 42 | 25 | 862  | 888  |
| Burundi                  | 48 | 44 | 26 | 940 | 966 | 59 | 54 | 32 | 1161 | 1194 | 47 | 44 | 26 | 928 | 953 | 58 | 54 | 32 | 1147 | 1179 |
| Cambodia                 | 14 | 13 | 8  | 232 | 241 | 18 | 17 | 10 | 297  | 307  | 14 | 13 | 8  | 230 | 238 | 18 | 17 | 10 | 294  | 304  |
| Cameroon                 | 22 | 17 | 11 | 353 | 364 | 28 | 21 | 14 | 437  | 450  | 22 | 16 | 11 | 340 | 351 | 27 | 20 | 13 | 421  | 434  |
| Canada                   | 5  | 3  | 3  | 66  | 69  | 7  | 4  | 3  | 80   | 83   | 5  | 3  | 3  | 66  | 68  | 7  | 4  | 3  | 79   | 83   |
| Cape Verde               | 24 | 15 | 11 | 360 | 371 | 29 | 19 | 14 | 445  | 459  | 23 | 15 | 11 | 357 | 368 | 29 | 19 | 14 | 441  | 455  |
| Central African Republic | 13 | 12 | 7  | 236 | 243 | 16 | 15 | 9  | 292  | 301  | 13 | 12 | 7  | 229 | 236 | 16 | 15 | 9  | 283  | 292  |
| Chad                     | 13 | 12 | 7  | 234 | 242 | 16 | 15 | 9  | 290  | 299  | 12 | 11 | 7  | 216 | 223 | 15 | 13 | 8  | 267  | 275  |
| Chile                    | 15 | 9  | 7  | 171 | 179 | 19 | 12 | 9  | 220  | 229  | 15 | 9  | 7  | 170 | 177 | 19 | 11 | 9  | 219  | 228  |
| China                    | 9  | 6  | 5  | 126 | 130 | 12 | 8  | 6  | 167  | 173  | 9  | 6  | 5  | 125 | 129 | 12 | 8  | 6  | 165  | 172  |
| Colombia                 | 15 | 9  | 7  | 175 | 182 | 19 | 12 | 9  | 225  | 234  | 14 | 9  | 7  | 173 | 180 | 19 | 12 | 9  | 222  | 231  |
| Comoros                  | 42 | 35 | 22 | 692 | 714 | 51 | 43 | 27 | 855  | 882  | 41 | 34 | 22 | 672 | 693 | 50 | 42 | 27 | 830  | 857  |
| Congo - Brazzaville      | 16 | 12 | 8  | 201 | 210 | 20 | 15 | 10 | 249  | 259  | 15 | 12 | 8  | 196 | 204 | 19 | 14 | 10 | 242  | 252  |
| Congo - Kinshasa         | 20 | 18 | 11 | 352 | 363 | 25 | 23 | 14 | 436  | 449  | 20 | 18 | 11 | 340 | 350 | 25 | 22 | 13 | 420  | 433  |
| Costa Rica               | 12 | 10 | 7  | 183 | 190 | 16 | 13 | 9  | 240  | 249  | 12 | 10 | 7  | 182 | 188 | 16 | 13 | 9  | 239  | 248  |
| Croatia                  | 8  | 6  | 4  | 120 | 125 | 10 | 7  | 5  | 147  | 152  | 8  | 6  | 4  | 119 | 124 | 9  | 7  | 5  | 146  | 151  |
| Cuba                     | 13 | 7  | 6  | 171 | 177 | 17 | 10 | 8  | 221  | 229  | 13 | 7  | 6  | 170 | 176 | 17 | 9  | 8  | 220  | 228  |
| Cyprus                   | 5  | 5  | 3  | 78  | 81  | 7  | 6  | 4  | 92   | 96   | 5  | 5  | 3  | 77  | 80  | 6  | 6  | 4  | 92   | 95   |
| Czechia                  | 9  | 6  | 5  | 128 | 133 | 12 | 7  | 6  | 156  | 162  | 9  | 6  | 5  | 127 | 132 | 11 | 7  | 6  | 155  | 161  |

|                    |    |    |    |     |     |    |    |    |     |     |    |    |    |     |     |    |    |    |     |     |
|--------------------|----|----|----|-----|-----|----|----|----|-----|-----|----|----|----|-----|-----|----|----|----|-----|-----|
| Cote d'Ivoire      | 22 | 19 | 12 | 308 | 320 | 28 | 24 | 15 | 380 | 395 | 22 | 19 | 12 | 298 | 309 | 27 | 23 | 14 | 368 | 382 |
| Denmark            | 10 | 4  | 4  | 73  | 78  | 12 | 5  | 5  | 90  | 95  | 10 | 4  | 4  | 73  | 77  | 12 | 5  | 5  | 89  | 94  |
| Djibouti           | 11 | 10 | 6  | 222 | 227 | 14 | 12 | 7  | 274 | 281 | 11 | 9  | 6  | 219 | 225 | 14 | 12 | 7  | 271 | 279 |
| Dominican Republic | 19 | 14 | 10 | 267 | 277 | 24 | 19 | 13 | 345 | 358 | 18 | 14 | 10 | 260 | 270 | 24 | 18 | 13 | 336 | 349 |
| Ecuador            | 24 | 17 | 12 | 289 | 301 | 31 | 22 | 16 | 372 | 387 | 24 | 17 | 12 | 287 | 299 | 31 | 21 | 16 | 369 | 384 |
| Egypt              | 3  | 2  | 2  | 37  | 38  | 4  | 3  | 2  | 45  | 47  | 3  | 2  | 2  | 36  | 38  | 3  | 3  | 2  | 45  | 47  |
| El Salvador        | 23 | 15 | 11 | 260 | 271 | 30 | 20 | 14 | 341 | 356 | 23 | 15 | 11 | 257 | 268 | 30 | 20 | 14 | 338 | 352 |
| Equatorial Guinea  | 20 | 13 | 9  | 258 | 267 | 24 | 16 | 12 | 319 | 330 | 19 | 13 | 9  | 255 | 264 | 24 | 16 | 12 | 315 | 327 |
| Eritrea            | 12 | 11 | 6  | 252 | 258 | 15 | 13 | 8  | 311 | 319 | 11 | 10 | 6  | 238 | 244 | 14 | 13 | 8  | 294 | 302 |
| Estonia            | 20 | 6  | 8  | 137 | 145 | 25 | 7  | 9  | 168 | 177 | 20 | 6  | 8  | 136 | 144 | 25 | 7  | 9  | 167 | 176 |
| Ethiopia           | 16 | 14 | 9  | 333 | 342 | 20 | 17 | 11 | 412 | 423 | 15 | 13 | 8  | 316 | 325 | 19 | 16 | 10 | 391 | 401 |
| Fiji               | 22 | 23 | 14 | 424 | 438 | 25 | 26 | 16 | 485 | 501 | 22 | 22 | 14 | 418 | 432 | 25 | 25 | 16 | 478 | 494 |
| Finland            | 5  | 2  | 2  | 37  | 39  | 6  | 3  | 3  | 45  | 48  | 5  | 2  | 2  | 37  | 39  | 6  | 3  | 3  | 45  | 47  |
| France             | 6  | 4  | 3  | 84  | 87  | 8  | 5  | 4  | 102 | 106 | 6  | 4  | 3  | 83  | 86  | 8  | 5  | 4  | 102 | 106 |
| Gabon              | 18 | 14 | 10 | 259 | 269 | 22 | 18 | 12 | 320 | 332 | 18 | 14 | 10 | 256 | 265 | 22 | 17 | 12 | 316 | 328 |
| Gambia             | 24 | 21 | 13 | 400 | 413 | 29 | 26 | 16 | 495 | 511 | 23 | 21 | 12 | 384 | 397 | 28 | 25 | 15 | 475 | 490 |
| Georgia            | 10 | 7  | 5  | 154 | 159 | 11 | 8  | 6  | 183 | 188 | 10 | 6  | 5  | 153 | 158 | 11 | 8  | 6  | 181 | 187 |
| Germany            | 7  | 3  | 3  | 75  | 79  | 8  | 4  | 4  | 92  | 96  | 7  | 3  | 3  | 75  | 78  | 8  | 4  | 4  | 92  | 96  |
| Ghana              | 29 | 22 | 15 | 395 | 410 | 36 | 27 | 18 | 489 | 507 | 29 | 21 | 14 | 388 | 402 | 35 | 26 | 18 | 479 | 497 |
| Greece             | 8  | 4  | 4  | 77  | 81  | 10 | 5  | 5  | 95  | 99  | 8  | 4  | 4  | 77  | 81  | 10 | 5  | 4  | 94  | 99  |
| Guatemala          | 23 | 16 | 11 | 307 | 318 | 30 | 21 | 15 | 403 | 418 | 22 | 15 | 11 | 301 | 312 | 29 | 20 | 14 | 396 | 410 |
| Guinea             | 38 | 35 | 21 | 639 | 660 | 47 | 43 | 26 | 791 | 816 | 36 | 33 | 19 | 598 | 618 | 44 | 40 | 24 | 740 | 764 |
| Guinea-Bissau      | 26 | 24 | 14 | 419 | 433 | 33 | 30 | 18 | 518 | 536 | 26 | 24 | 14 | 413 | 427 | 32 | 29 | 18 | 510 | 528 |
| Guyana             | 30 | 20 | 15 | 382 | 396 | 39 | 25 | 19 | 490 | 509 | 30 | 20 | 14 | 377 | 391 | 38 | 25 | 18 | 484 | 503 |
| Haiti              | 16 | 14 | 9  | 242 | 250 | 21 | 18 | 11 | 313 | 324 | 16 | 14 | 9  | 239 | 248 | 21 | 18 | 11 | 309 | 320 |
| Honduras           | 17 | 12 | 8  | 302 | 310 | 23 | 16 | 11 | 397 | 408 | 17 | 12 | 8  | 297 | 305 | 22 | 15 | 11 | 390 | 401 |
| Hungary            | 15 | 6  | 6  | 146 | 153 | 18 | 8  | 8  | 179 | 187 | 15 | 6  | 6  | 145 | 152 | 18 | 8  | 8  | 178 | 186 |

|            |    |    |    |      |      |    |    |    |      |      |    |    |    |      |      |    |    |    |      |      |
|------------|----|----|----|------|------|----|----|----|------|------|----|----|----|------|------|----|----|----|------|------|
| Iceland    | 9  | 2  | 3  | 83   | 86   | 11 | 3  | 4  | 101  | 105  | 9  | 2  | 3  | 82   | 85   | 10 | 3  | 4  | 101  | 105  |
| India      | 14 | 10 | 7  | 208  | 215  | 18 | 13 | 9  | 265  | 274  | 14 | 10 | 7  | 204  | 211  | 18 | 13 | 9  | 260  | 269  |
| Indonesia  | 22 | 18 | 12 | 345  | 357  | 28 | 22 | 15 | 441  | 456  | 22 | 17 | 12 | 340  | 351  | 28 | 22 | 15 | 434  | 449  |
| Iran       | 3  | 2  | 2  | 39   | 41   | 4  | 3  | 2  | 50   | 52   | 3  | 2  | 2  | 39   | 41   | 4  | 3  | 2  | 50   | 52   |
| Iraq       | 2  | 1  | 1  | 30   | 31   | 2  | 2  | 1  | 36   | 37   | 2  | 1  | 1  | 30   | 31   | 2  | 2  | 1  | 36   | 37   |
| Ireland    | 9  | 4  | 4  | 96   | 101  | 11 | 5  | 5  | 118  | 123  | 9  | 4  | 4  | 96   | 100  | 11 | 5  | 5  | 117  | 122  |
| Israel     | 5  | 4  | 3  | 84   | 87   | 6  | 5  | 4  | 100  | 104  | 5  | 4  | 3  | 84   | 87   | 6  | 5  | 4  | 99   | 103  |
| Italy      | 6  | 2  | 3  | 54   | 57   | 8  | 3  | 3  | 66   | 69   | 6  | 2  | 3  | 54   | 56   | 8  | 3  | 3  | 66   | 69   |
| Jamaica    | 24 | 22 | 15 | 477  | 491  | 32 | 28 | 19 | 616  | 635  | 24 | 22 | 14 | 473  | 487  | 31 | 28 | 19 | 611  | 630  |
| Japan      | 12 | 4  | 6  | 102  | 107  | 16 | 6  | 8  | 135  | 142  | 12 | 4  | 6  | 101  | 107  | 16 | 6  | 7  | 134  | 142  |
| Jordan     | 4  | 2  | 2  | 49   | 51   | 4  | 3  | 2  | 58   | 60   | 4  | 2  | 2  | 49   | 50   | 4  | 3  | 2  | 58   | 60   |
| Kazakhstan | 14 | 8  | 7  | 209  | 215  | 16 | 9  | 8  | 248  | 256  | 14 | 8  | 7  | 207  | 214  | 16 | 9  | 8  | 246  | 254  |
| Kenya      | 30 | 23 | 15 | 479  | 495  | 37 | 28 | 19 | 593  | 611  | 29 | 22 | 15 | 467  | 482  | 36 | 27 | 18 | 577  | 596  |
| Kuwait     | 3  | 3  | 2  | 58   | 60   | 4  | 3  | 2  | 69   | 72   | 3  | 3  | 2  | 58   | 60   | 4  | 3  | 2  | 69   | 71   |
| Kyrgyzstan | 19 | 12 | 9  | 286  | 295  | 22 | 14 | 11 | 340  | 350  | 19 | 12 | 9  | 284  | 293  | 22 | 14 | 11 | 337  | 347  |
| Laos       | 11 | 9  | 6  | 157  | 163  | 14 | 11 | 7  | 200  | 208  | 11 | 9  | 6  | 155  | 161  | 14 | 11 | 7  | 198  | 205  |
| Latvia     | 18 | 8  | 8  | 187  | 195  | 22 | 10 | 10 | 229  | 238  | 18 | 8  | 8  | 186  | 193  | 22 | 10 | 10 | 227  | 237  |
| Lebanon    | 10 | 8  | 5  | 130  | 135  | 11 | 9  | 6  | 154  | 160  | 10 | 8  | 5  | 129  | 134  | 11 | 9  | 6  | 153  | 159  |
| Lesotho    | 43 | 36 | 23 | 596  | 619  | 53 | 45 | 28 | 737  | 765  | 42 | 35 | 22 | 583  | 605  | 52 | 44 | 27 | 720  | 748  |
| Liberia    | 34 | 31 | 18 | 567  | 586  | 42 | 38 | 23 | 701  | 724  | 33 | 30 | 18 | 555  | 573  | 41 | 37 | 22 | 686  | 708  |
| Libya      | 13 | 7  | 6  | 121  | 127  | 16 | 8  | 7  | 150  | 157  | 13 | 7  | 6  | 120  | 125  | 15 | 8  | 7  | 148  | 155  |
| Lithuania  | 16 | 9  | 8  | 213  | 221  | 20 | 11 | 9  | 261  | 271  | 16 | 9  | 8  | 212  | 220  | 20 | 11 | 9  | 260  | 269  |
| Luxembourg | 7  | 4  | 4  | 89   | 93   | 9  | 5  | 4  | 109  | 113  | 7  | 4  | 4  | 88   | 92   | 9  | 5  | 4  | 108  | 113  |
| Macedonia  | 9  | 4  | 4  | 94   | 97   | 11 | 5  | 5  | 114  | 119  | 9  | 4  | 4  | 93   | 97   | 11 | 5  | 5  | 114  | 118  |
| Madagascar | 48 | 39 | 25 | 819  | 844  | 60 | 48 | 31 | 1013 | 1044 | 48 | 39 | 25 | 805  | 829  | 59 | 48 | 31 | 995  | 1025 |
| Malawi     | 56 | 45 | 29 | 1199 | 1228 | 69 | 55 | 36 | 1482 | 1517 | 55 | 44 | 28 | 1175 | 1204 | 68 | 55 | 35 | 1453 | 1488 |
| Malaysia   | 11 | 9  | 6  | 172  | 178  | 14 | 12 | 8  | 220  | 228  | 11 | 9  | 6  | 170  | 177  | 14 | 12 | 8  | 218  | 226  |

|                         |    |    |    |     |     |    |    |    |     |     |    |    |    |     |     |    |    |    |     |     |
|-------------------------|----|----|----|-----|-----|----|----|----|-----|-----|----|----|----|-----|-----|----|----|----|-----|-----|
| Maldives                | 23 | 17 | 12 | 429 | 442 | 29 | 22 | 16 | 549 | 564 | 23 | 17 | 12 | 427 | 439 | 29 | 22 | 16 | 545 | 561 |
| Mali                    | 33 | 28 | 17 | 540 | 557 | 40 | 35 | 21 | 668 | 689 | 31 | 27 | 16 | 509 | 526 | 38 | 33 | 20 | 629 | 650 |
| Malta                   | 3  | 4  | 2  | 76  | 79  | 4  | 5  | 3  | 93  | 96  | 3  | 4  | 2  | 76  | 78  | 4  | 5  | 3  | 93  | 96  |
| Mauritania              | 30 | 25 | 16 | 429 | 445 | 38 | 31 | 20 | 530 | 550 | 27 | 22 | 14 | 374 | 388 | 33 | 27 | 17 | 462 | 480 |
| Mauritius               | 16 | 8  | 7  | 152 | 159 | 19 | 10 | 9  | 188 | 197 | 16 | 8  | 7  | 151 | 158 | 19 | 10 | 9  | 187 | 195 |
| Mexico                  | 11 | 7  | 5  | 148 | 153 | 14 | 9  | 7  | 194 | 201 | 11 | 7  | 5  | 146 | 152 | 14 | 9  | 7  | 192 | 199 |
| Moldova                 | 18 | 8  | 8  | 198 | 206 | 22 | 10 | 9  | 242 | 252 | 18 | 8  | 7  | 196 | 204 | 22 | 10 | 9  | 240 | 249 |
| Mongolia                | 21 | 13 | 10 | 247 | 257 | 28 | 18 | 14 | 327 | 340 | 21 | 13 | 10 | 244 | 254 | 28 | 17 | 14 | 323 | 337 |
| Montenegro              | 11 | 6  | 5  | 143 | 148 | 13 | 8  | 6  | 175 | 181 | 11 | 6  | 5  | 142 | 147 | 13 | 8  | 6  | 173 | 180 |
| Morocco                 | 20 | 17 | 11 | 358 | 369 | 24 | 21 | 14 | 443 | 457 | 20 | 17 | 11 | 356 | 367 | 24 | 21 | 14 | 440 | 454 |
| Mozambique              | 37 | 33 | 20 | 698 | 718 | 46 | 41 | 25 | 863 | 888 | 36 | 32 | 19 | 675 | 694 | 44 | 40 | 24 | 834 | 858 |
| Myanmar                 | 17 | 13 | 9  | 273 | 282 | 22 | 16 | 11 | 349 | 360 | 17 | 13 | 9  | 269 | 278 | 21 | 16 | 11 | 344 | 355 |
| Namibia                 | 25 | 18 | 12 | 287 | 299 | 30 | 22 | 15 | 355 | 370 | 24 | 18 | 12 | 281 | 294 | 30 | 22 | 15 | 348 | 363 |
| Nepal                   | 16 | 11 | 8  | 337 | 345 | 20 | 14 | 10 | 431 | 441 | 16 | 11 | 8  | 332 | 340 | 20 | 14 | 10 | 425 | 435 |
| Netherlands             | 5  | 3  | 2  | 52  | 54  | 7  | 3  | 3  | 64  | 67  | 5  | 3  | 2  | 52  | 54  | 7  | 3  | 3  | 63  | 66  |
| New Zealand             | 6  | 3  | 3  | 68  | 71  | 7  | 4  | 3  | 78  | 81  | 6  | 3  | 3  | 68  | 71  | 7  | 4  | 3  | 77  | 81  |
| Nicaragua               | 20 | 16 | 11 | 345 | 356 | 27 | 21 | 14 | 453 | 467 | 20 | 15 | 10 | 335 | 346 | 26 | 20 | 14 | 441 | 454 |
| Niger                   | 7  | 7  | 4  | 158 | 162 | 9  | 9  | 5  | 196 | 201 | 7  | 7  | 4  | 149 | 153 | 9  | 8  | 5  | 184 | 189 |
| Nigeria                 | 19 | 15 | 10 | 255 | 264 | 24 | 18 | 12 | 315 | 327 | 18 | 14 | 9  | 240 | 249 | 22 | 17 | 11 | 297 | 308 |
| North Korea             | 9  | 4  | 3  | 91  | 95  | 12 | 5  | 4  | 121 | 125 | 9  | 4  | 3  | 91  | 94  | 12 | 5  | 4  | 120 | 125 |
| Norway                  | 9  | 4  | 4  | 63  | 67  | 11 | 4  | 5  | 78  | 82  | 9  | 4  | 4  | 63  | 67  | 11 | 4  | 5  | 77  | 82  |
| Oman                    | 7  | 6  | 4  | 128 | 132 | 9  | 7  | 5  | 152 | 156 | 7  | 6  | 4  | 127 | 131 | 9  | 7  | 5  | 150 | 155 |
| Pakistan                | 6  | 4  | 3  | 101 | 104 | 8  | 6  | 4  | 128 | 132 | 6  | 4  | 3  | 99  | 102 | 7  | 6  | 4  | 127 | 131 |
| Palestinian Territories | 4  | 3  | 2  | 57  | 60  | 5  | 4  | 3  | 68  | 71  | 4  | 3  | 2  | 57  | 59  | 5  | 4  | 3  | 67  | 70  |
| Panama                  | 20 | 12 | 10 | 259 | 268 | 26 | 16 | 13 | 340 | 352 | 19 | 12 | 10 | 257 | 267 | 26 | 16 | 13 | 338 | 350 |
| Papua New Guinea        | 24 | 18 | 12 | 391 | 403 | 27 | 21 | 14 | 447 | 461 | 23 | 18 | 12 | 386 | 398 | 27 | 21 | 14 | 441 | 455 |
| Paraguay                | 31 | 21 | 15 | 406 | 421 | 40 | 27 | 20 | 522 | 541 | 31 | 20 | 15 | 401 | 416 | 39 | 26 | 19 | 515 | 534 |

|                 |    |    |    |     |     |    |    |    |      |      |    |    |    |     |     |    |    |    |      |      |
|-----------------|----|----|----|-----|-----|----|----|----|------|------|----|----|----|-----|-----|----|----|----|------|------|
| Peru            | 26 | 16 | 12 | 312 | 324 | 34 | 20 | 16 | 401  | 417  | 26 | 16 | 12 | 308 | 321 | 33 | 20 | 16 | 396  | 412  |
| Philippines     | 14 | 12 | 8  | 222 | 230 | 18 | 15 | 10 | 284  | 294  | 14 | 12 | 8  | 220 | 228 | 18 | 15 | 10 | 281  | 291  |
| Poland          | 11 | 8  | 6  | 160 | 166 | 14 | 9  | 7  | 196  | 203  | 11 | 8  | 6  | 159 | 165 | 14 | 9  | 7  | 195  | 202  |
| Portugal        | 9  | 5  | 4  | 103 | 108 | 11 | 6  | 5  | 126  | 132  | 9  | 5  | 4  | 103 | 107 | 11 | 6  | 5  | 126  | 131  |
| Qatar           | 4  | 3  | 2  | 96  | 99  | 5  | 4  | 3  | 114  | 117  | 4  | 3  | 2  | 96  | 98  | 5  | 4  | 3  | 114  | 117  |
| Romania         | 20 | 11 | 9  | 250 | 259 | 24 | 14 | 12 | 306  | 317  | 20 | 11 | 9  | 248 | 257 | 24 | 14 | 12 | 303  | 315  |
| Russia          | 13 | 6  | 6  | 164 | 170 | 16 | 7  | 7  | 201  | 208  | 13 | 6  | 6  | 163 | 169 | 16 | 7  | 7  | 200  | 207  |
| Rwanda          | 29 | 24 | 15 | 561 | 576 | 36 | 30 | 19 | 693  | 712  | 29 | 24 | 15 | 555 | 570 | 36 | 30 | 19 | 686  | 705  |
| Samoa           | 11 | 9  | 6  | 227 | 233 | 13 | 10 | 7  | 259  | 266  | 11 | 9  | 6  | 225 | 231 | 13 | 10 | 7  | 257  | 264  |
| Saudi Arabia    | 3  | 2  | 2  | 41  | 43  | 4  | 2  | 2  | 49   | 51   | 3  | 2  | 2  | 41  | 43  | 4  | 2  | 2  | 49   | 51   |
| Senegal         | 36 | 30 | 19 | 617 | 636 | 45 | 37 | 24 | 763  | 786  | 35 | 30 | 19 | 603 | 621 | 44 | 37 | 23 | 745  | 768  |
| Serbia          | 17 | 8  | 8  | 191 | 199 | 21 | 10 | 9  | 234  | 243  | 17 | 8  | 8  | 189 | 197 | 21 | 10 | 9  | 232  | 241  |
| Sierra Leone    | 10 | 10 | 6  | 162 | 168 | 13 | 12 | 7  | 200  | 207  | 10 | 9  | 5  | 155 | 161 | 12 | 11 | 7  | 192  | 198  |
| Singapore       | 20 | 9  | 9  | 158 | 167 | 26 | 11 | 11 | 202  | 213  | 20 | 9  | 9  | 157 | 166 | 26 | 11 | 11 | 201  | 212  |
| Slovakia        | 15 | 7  | 7  | 169 | 176 | 18 | 9  | 8  | 207  | 215  | 15 | 7  | 7  | 168 | 175 | 18 | 9  | 8  | 206  | 214  |
| Slovenia        | 6  | 5  | 4  | 99  | 102 | 8  | 6  | 4  | 121  | 125  | 6  | 5  | 4  | 98  | 102 | 8  | 6  | 4  | 120  | 124  |
| Solomon Islands | 18 | 13 | 9  | 424 | 433 | 21 | 15 | 10 | 485  | 495  | 18 | 13 | 9  | 421 | 430 | 21 | 15 | 10 | 481  | 492  |
| Somalia         | 17 | 16 | 9  | 330 | 339 | 21 | 20 | 12 | 408  | 419  | 17 | 16 | 9  | 328 | 337 | 21 | 20 | 11 | 405  | 417  |
| South Africa    | 34 | 18 | 15 | 366 | 381 | 42 | 23 | 19 | 452  | 471  | 34 | 18 | 15 | 360 | 375 | 42 | 22 | 19 | 446  | 464  |
| South Korea     | 9  | 5  | 5  | 81  | 86  | 13 | 6  | 6  | 108  | 114  | 9  | 5  | 5  | 81  | 85  | 13 | 6  | 6  | 107  | 113  |
| South Sudan     | 19 | 17 | 10 | 328 | 339 | 24 | 21 | 13 | 406  | 419  | 19 | 17 | 10 | 326 | 337 | 24 | 21 | 13 | 403  | 416  |
| Spain           | 5  | 3  | 2  | 63  | 66  | 6  | 3  | 3  | 77   | 80   | 5  | 3  | 2  | 63  | 65  | 6  | 3  | 3  | 77   | 80   |
| Sri Lanka       | 10 | 7  | 5  | 131 | 136 | 13 | 9  | 7  | 168  | 174  | 10 | 7  | 5  | 130 | 135 | 13 | 9  | 7  | 167  | 173  |
| St. Lucia       | 12 | 16 | 9  | 305 | 314 | 16 | 21 | 12 | 395  | 407  | 12 | 16 | 9  | 303 | 312 | 16 | 20 | 12 | 391  | 403  |
| Sudan           | 7  | 6  | 4  | 110 | 113 | 9  | 7  | 4  | 136  | 140  | 7  | 6  | 4  | 109 | 112 | 8  | 7  | 4  | 134  | 139  |
| Suriname        | 24 | 15 | 12 | 336 | 348 | 31 | 20 | 15 | 432  | 447  | 24 | 15 | 12 | 333 | 345 | 31 | 20 | 15 | 428  | 443  |
| Swaziland       | 72 | 58 | 37 | 910 | 947 | 88 | 72 | 46 | 1125 | 1171 | 70 | 57 | 36 | 888 | 924 | 87 | 70 | 45 | 1097 | 1142 |

|                       |    |    |    |     |     |    |    |    |      |      |    |    |    |     |     |    |    |    |      |      |
|-----------------------|----|----|----|-----|-----|----|----|----|------|------|----|----|----|-----|-----|----|----|----|------|------|
| Sweden                | 8  | 4  | 4  | 77  | 81  | 9  | 5  | 5  | 94   | 99   | 8  | 4  | 4  | 77  | 80  | 9  | 5  | 5  | 94   | 98   |
| Switzerland           | 4  | 2  | 2  | 43  | 45  | 5  | 3  | 3  | 53   | 55   | 4  | 2  | 2  | 43  | 45  | 5  | 3  | 3  | 52   | 55   |
| Syria                 | 5  | 4  | 3  | 81  | 84  | 6  | 5  | 3  | 96   | 99   | 5  | 4  | 3  | 80  | 83  | 6  | 5  | 3  | 95   | 98   |
| São Tomé and Príncipe | 36 | 31 | 20 | 597 | 617 | 45 | 38 | 24 | 738  | 763  | 36 | 31 | 19 | 588 | 607 | 44 | 38 | 24 | 727  | 751  |
| Tajikistan            | 5  | 3  | 2  | 85  | 88  | 6  | 4  | 3  | 101  | 104  | 5  | 3  | 2  | 85  | 87  | 6  | 4  | 3  | 100  | 103  |
| Tanzania              | 54 | 43 | 28 | 869 | 897 | 67 | 53 | 35 | 1074 | 1108 | 53 | 42 | 28 | 854 | 882 | 66 | 52 | 34 | 1056 | 1090 |
| Thailand              | 17 | 10 | 8  | 267 | 276 | 21 | 13 | 10 | 342  | 352  | 17 | 10 | 8  | 266 | 274 | 21 | 13 | 10 | 340  | 350  |
| Timor-Leste           | 10 | 6  | 5  | 136 | 141 | 13 | 8  | 6  | 174  | 180  | 10 | 6  | 5  | 134 | 139 | 13 | 8  | 6  | 171  | 177  |
| Togo                  | 20 | 17 | 11 | 288 | 299 | 25 | 21 | 13 | 356  | 369  | 20 | 17 | 11 | 282 | 293 | 25 | 21 | 13 | 349  | 362  |
| Trinidad & Tobago     | 12 | 12 | 8  | 233 | 241 | 16 | 16 | 10 | 301  | 311  | 12 | 12 | 8  | 231 | 239 | 16 | 16 | 10 | 298  | 308  |
| Tunisia               | 5  | 4  | 3  | 77  | 79  | 6  | 5  | 3  | 95   | 98   | 5  | 4  | 3  | 76  | 79  | 6  | 5  | 3  | 94   | 97   |
| Turkey                | 6  | 5  | 3  | 89  | 92  | 7  | 5  | 4  | 105  | 109  | 6  | 5  | 3  | 88  | 91  | 7  | 5  | 4  | 105  | 108  |
| Turkmenistan          | 12 | 9  | 6  | 200 | 206 | 14 | 10 | 7  | 237  | 244  | 12 | 8  | 6  | 198 | 204 | 14 | 10 | 7  | 235  | 242  |
| Uganda                | 46 | 38 | 24 | 806 | 830 | 57 | 47 | 30 | 996  | 1026 | 45 | 37 | 24 | 785 | 808 | 56 | 46 | 29 | 970  | 999  |
| Ukraine               | 13 | 6  | 6  | 166 | 171 | 16 | 7  | 7  | 203  | 209  | 13 | 6  | 5  | 165 | 170 | 16 | 7  | 7  | 201  | 208  |
| United Arab Emirates  | 10 | 9  | 6  | 146 | 152 | 12 | 10 | 7  | 174  | 181  | 10 | 9  | 6  | 145 | 151 | 12 | 10 | 7  | 172  | 179  |
| United Kingdom        | 6  | 3  | 3  | 57  | 60  | 8  | 3  | 4  | 70   | 74   | 6  | 3  | 3  | 57  | 60  | 8  | 3  | 4  | 70   | 73   |
| United States         | 6  | 3  | 3  | 65  | 68  | 7  | 3  | 3  | 79   | 83   | 6  | 3  | 3  | 65  | 68  | 7  | 3  | 3  | 79   | 82   |
| Uruguay               | 11 | 7  | 6  | 178 | 183 | 14 | 9  | 7  | 228  | 236  | 11 | 7  | 6  | 176 | 182 | 14 | 9  | 7  | 227  | 234  |
| Uzbekistan            | 9  | 5  | 4  | 131 | 135 | 11 | 6  | 5  | 155  | 160  | 9  | 5  | 4  | 130 | 134 | 10 | 6  | 5  | 154  | 159  |
| Vanuatu               | 12 | 8  | 6  | 262 | 268 | 14 | 9  | 7  | 300  | 306  | 12 | 8  | 6  | 260 | 266 | 14 | 9  | 7  | 297  | 304  |
| Venezuela             | 21 | 12 | 10 | 275 | 285 | 26 | 16 | 13 | 353  | 366  | 21 | 12 | 10 | 273 | 282 | 26 | 16 | 13 | 350  | 363  |
| Vietnam               | 7  | 5  | 4  | 114 | 118 | 9  | 7  | 5  | 146  | 151  | 7  | 5  | 4  | 113 | 117 | 9  | 7  | 5  | 145  | 150  |
| Yemen                 | 2  | 1  | 1  | 27  | 28  | 2  | 1  | 1  | 33   | 34   | 2  | 1  | 1  | 27  | 28  | 2  | 1  | 1  | 32   | 33   |
| Zambia                | 63 | 47 | 32 | 871 | 903 | 78 | 59 | 40 | 1077 | 1117 | 62 | 46 | 31 | 846 | 877 | 76 | 57 | 39 | 1046 | 1084 |
| Zimbabwe              | 53 | 43 | 28 | 762 | 790 | 66 | 54 | 34 | 943  | 977  | 53 | 43 | 27 | 747 | 775 | 65 | 53 | 34 | 924  | 957  |

### **A19. Vaccination impact in comparative scenarios**

Percentage changes in the lifetime impact of HPV vaccination on cases, deaths, YLLs, YLDs and DALYs averted per 1000 vaccinated girls in each of the 177 countries for the different comparative scenarios (s2, s3, s4, s5) in comparison to the base scenario (s1) for bivalent/quadrivalent and nonavalent vaccination of 9-year-old and 12-year-old girls.

# Percentage change in cases averted per 1000 vaccinated girls (vaccination age = 9 years / bivalent/quadrivalent vaccine)

Comparison of scenario s2 in comparison to scenario s1

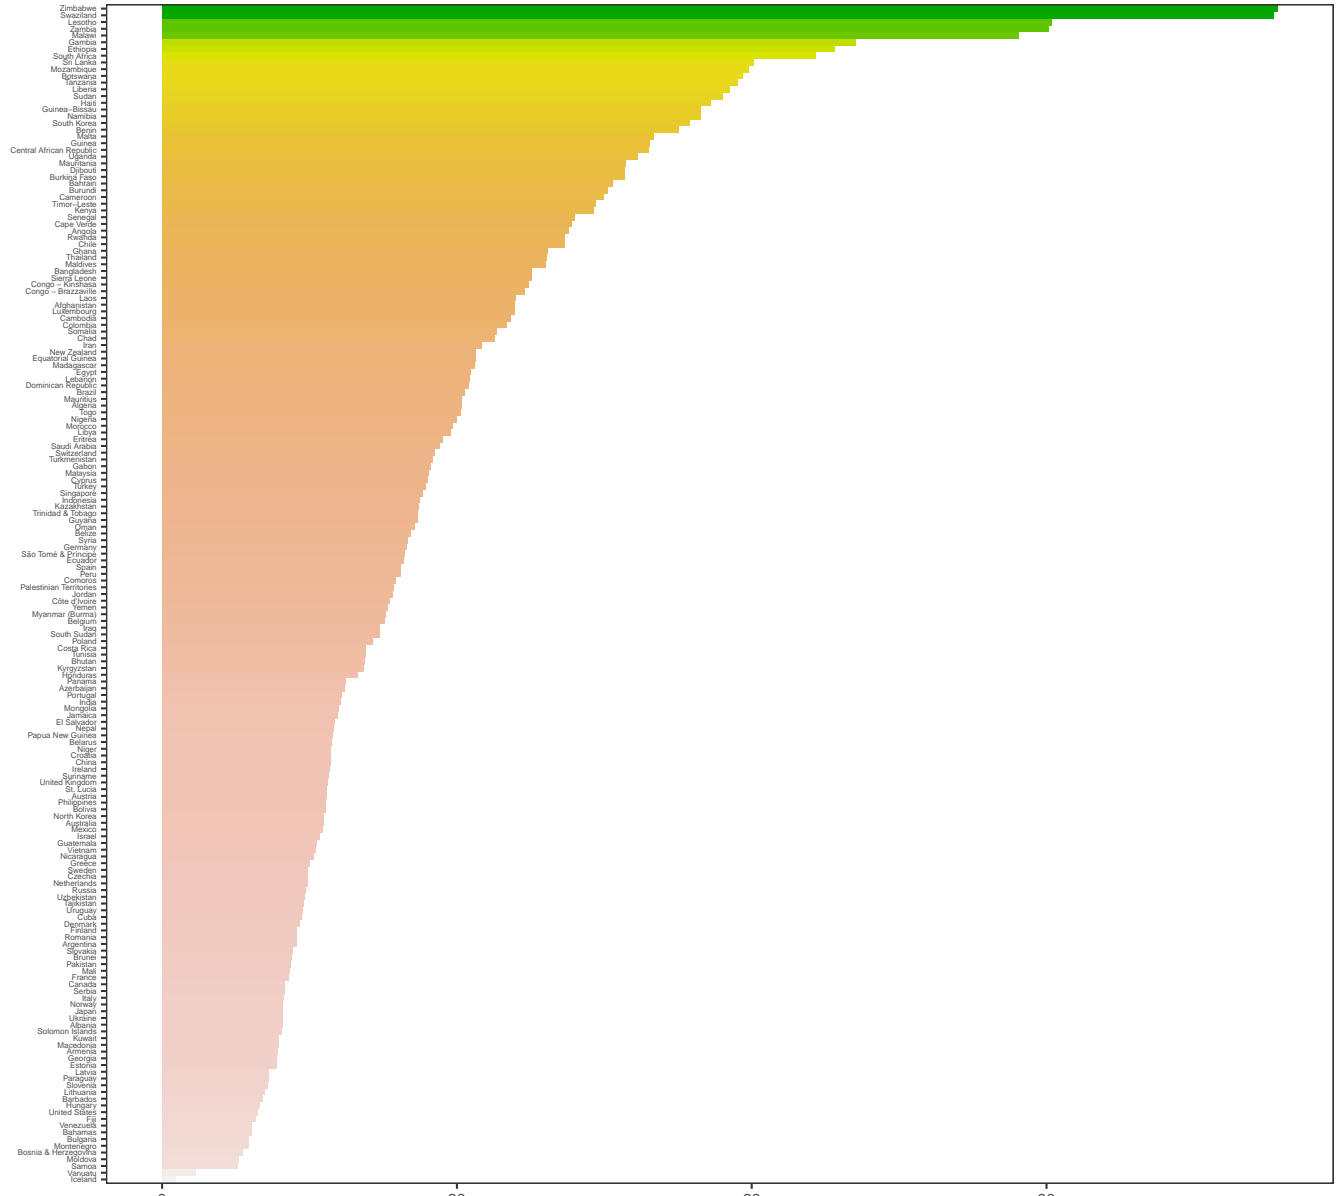

Percentage change in cases averted per 1000 vaccinated girls



# Percentage change in deaths averted per 1000 vaccinated girls (vaccination age = 9 years / bivalent/quadrivalent vaccine)

Comparison of scenario s2 in comparison to scenario s1

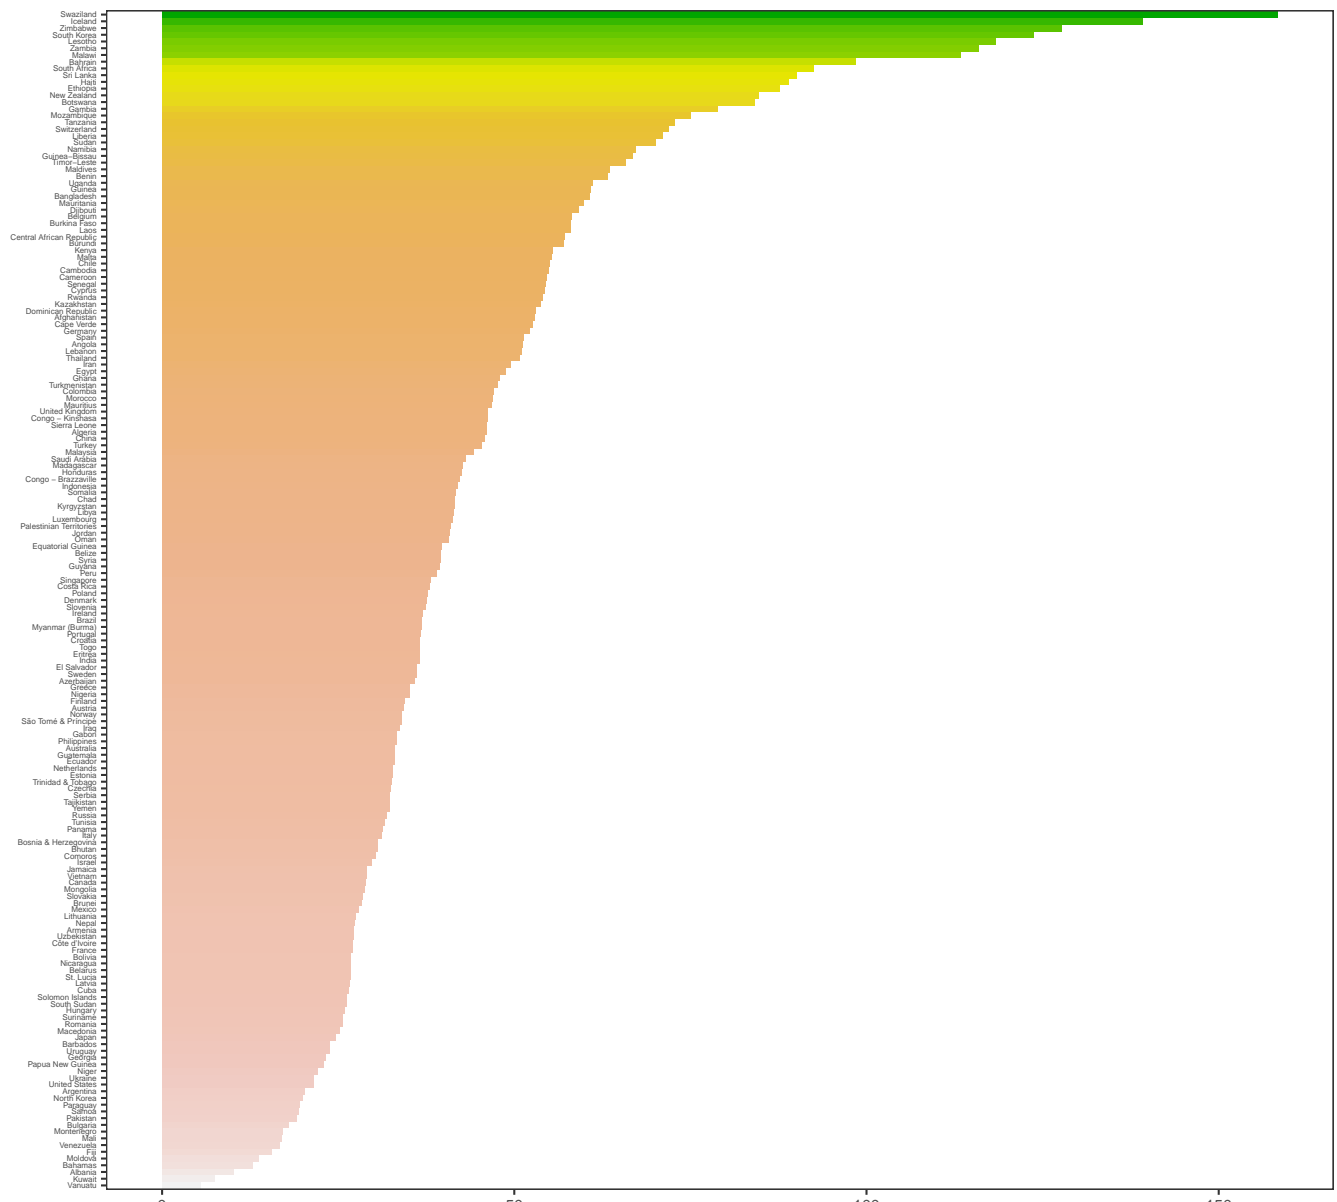

Percentage change in deaths averted per 1000 vaccinated girls

# Percentage change in YLDs averted per 1000 vaccinated girls (vaccination age = 9 years / bivalent/quadrivalent vaccine)

Comparison of scenario s2 in comparison to scenario s1

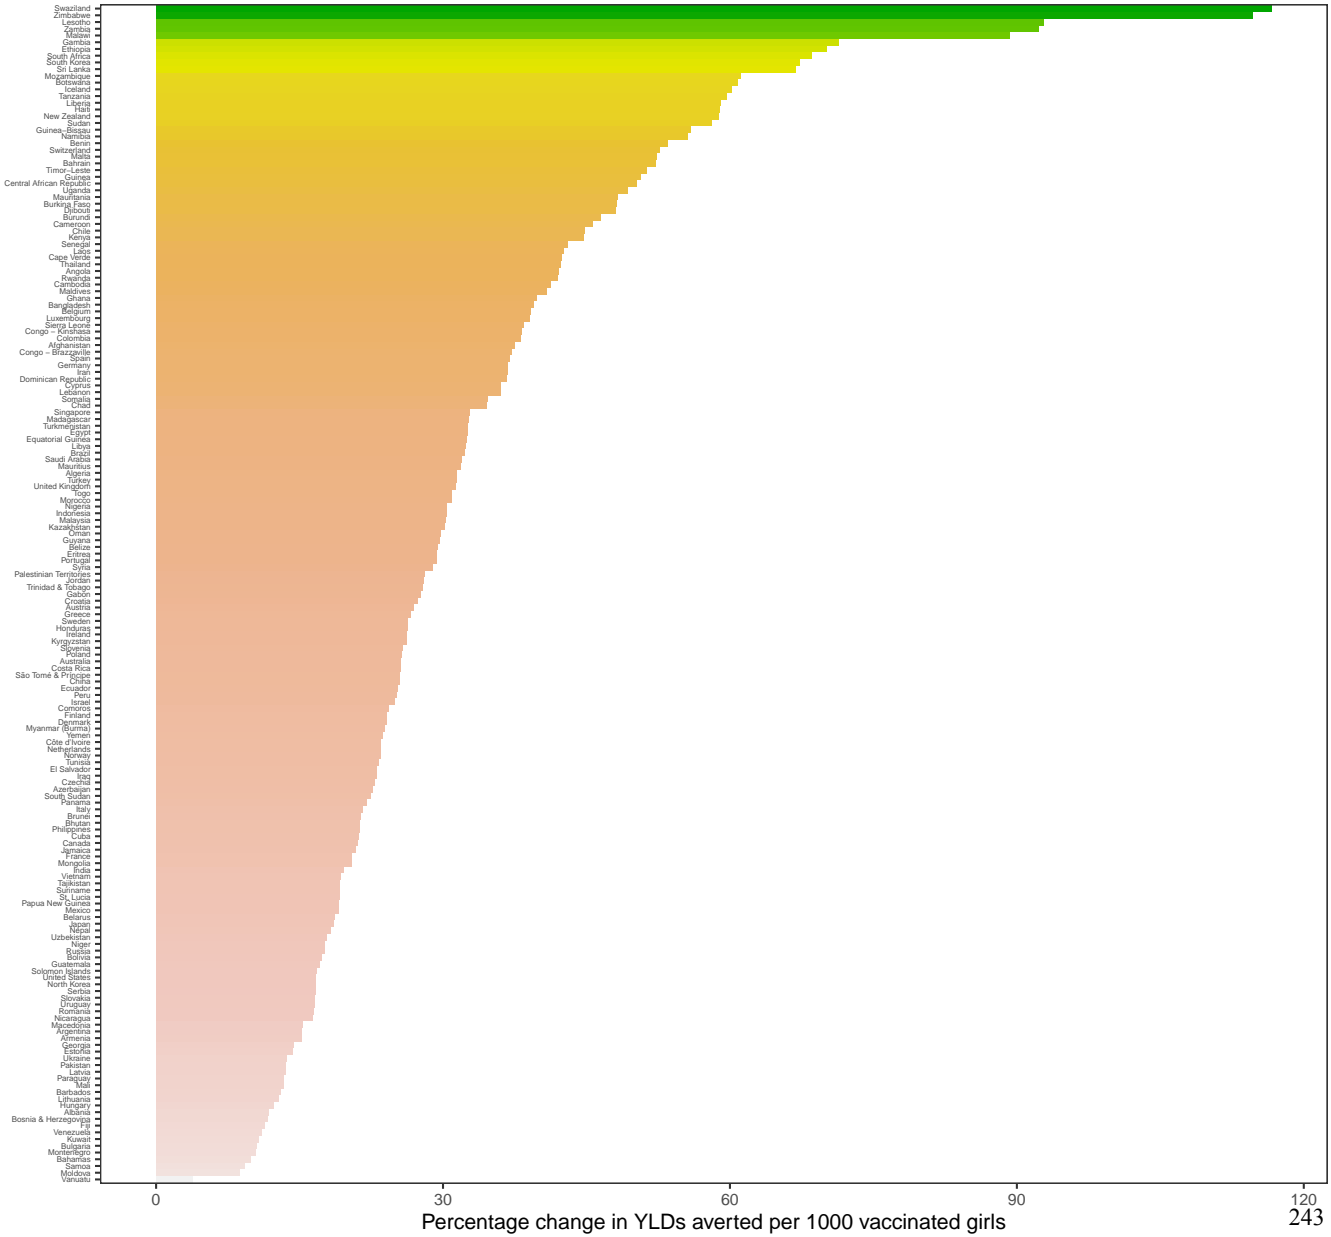

Percentage change in YLDs averted per 1000 vaccinated girls

# Percentage change in YLLs averted per 1000 vaccinated girls (vaccination age = 9 years / bivalent/quadrivalent vaccine)

Comparison of scenario s2 in comparison to scenario s1

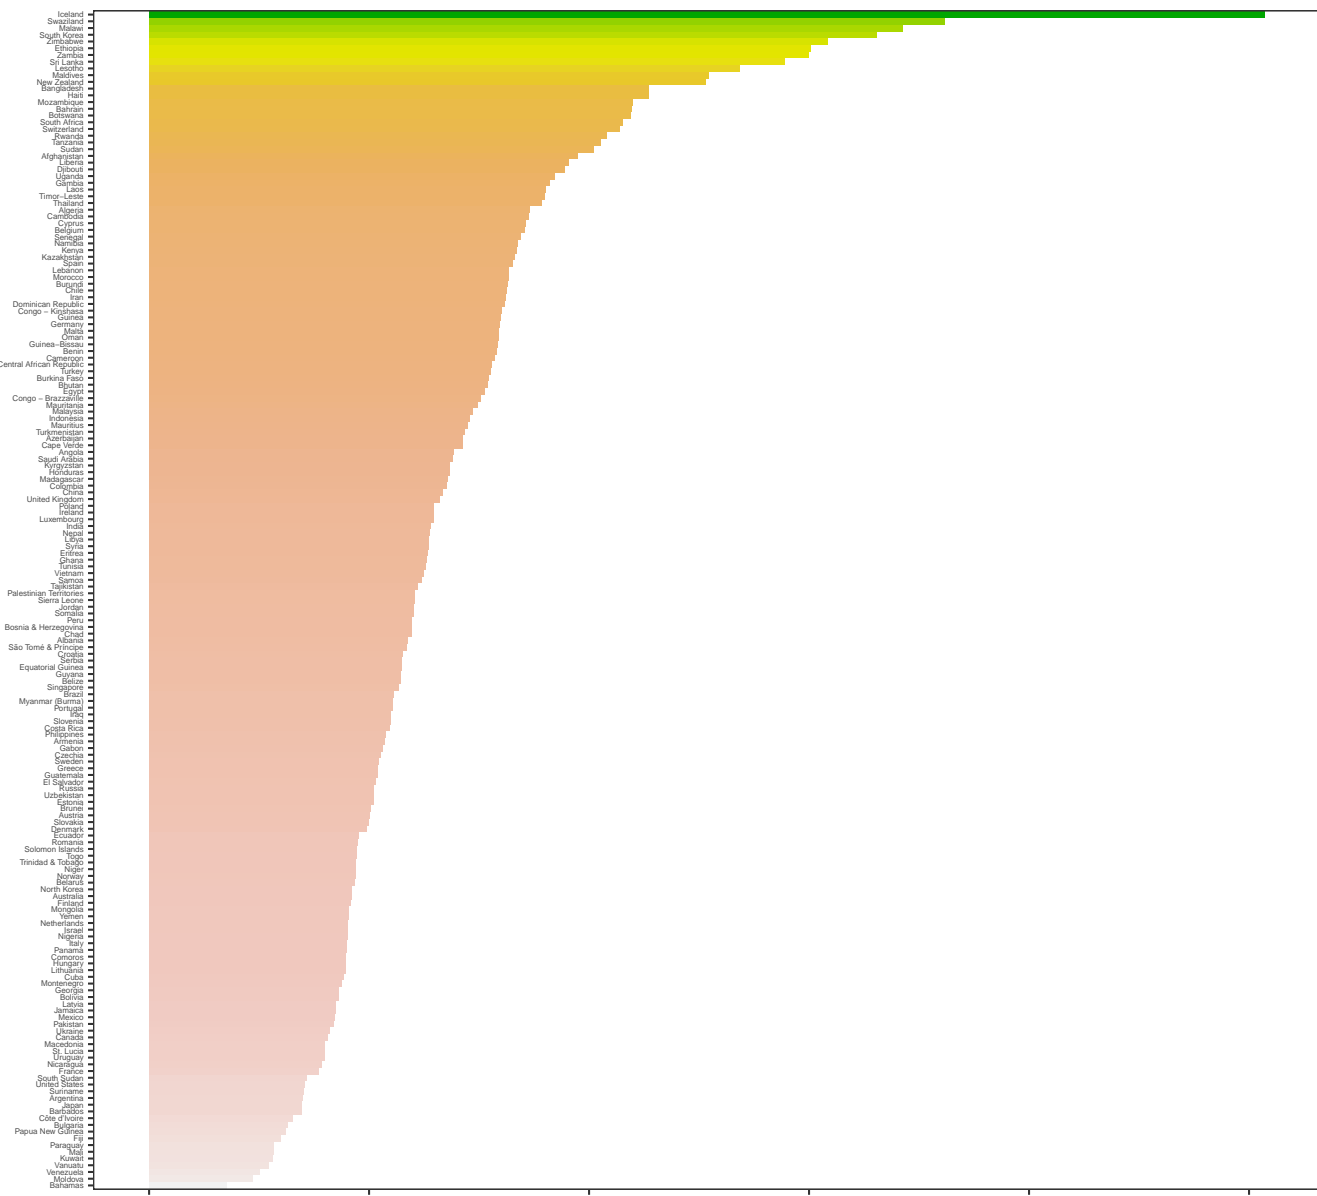

Percentage change in YLLs averted per 1000 vaccinated girls

# Percentage change in DALYs averted per 1000 vaccinated girls (vaccination age = 9 years / bivalent/quadrivalent vaccine)

Comparison of scenario s2 in comparison to scenario s1

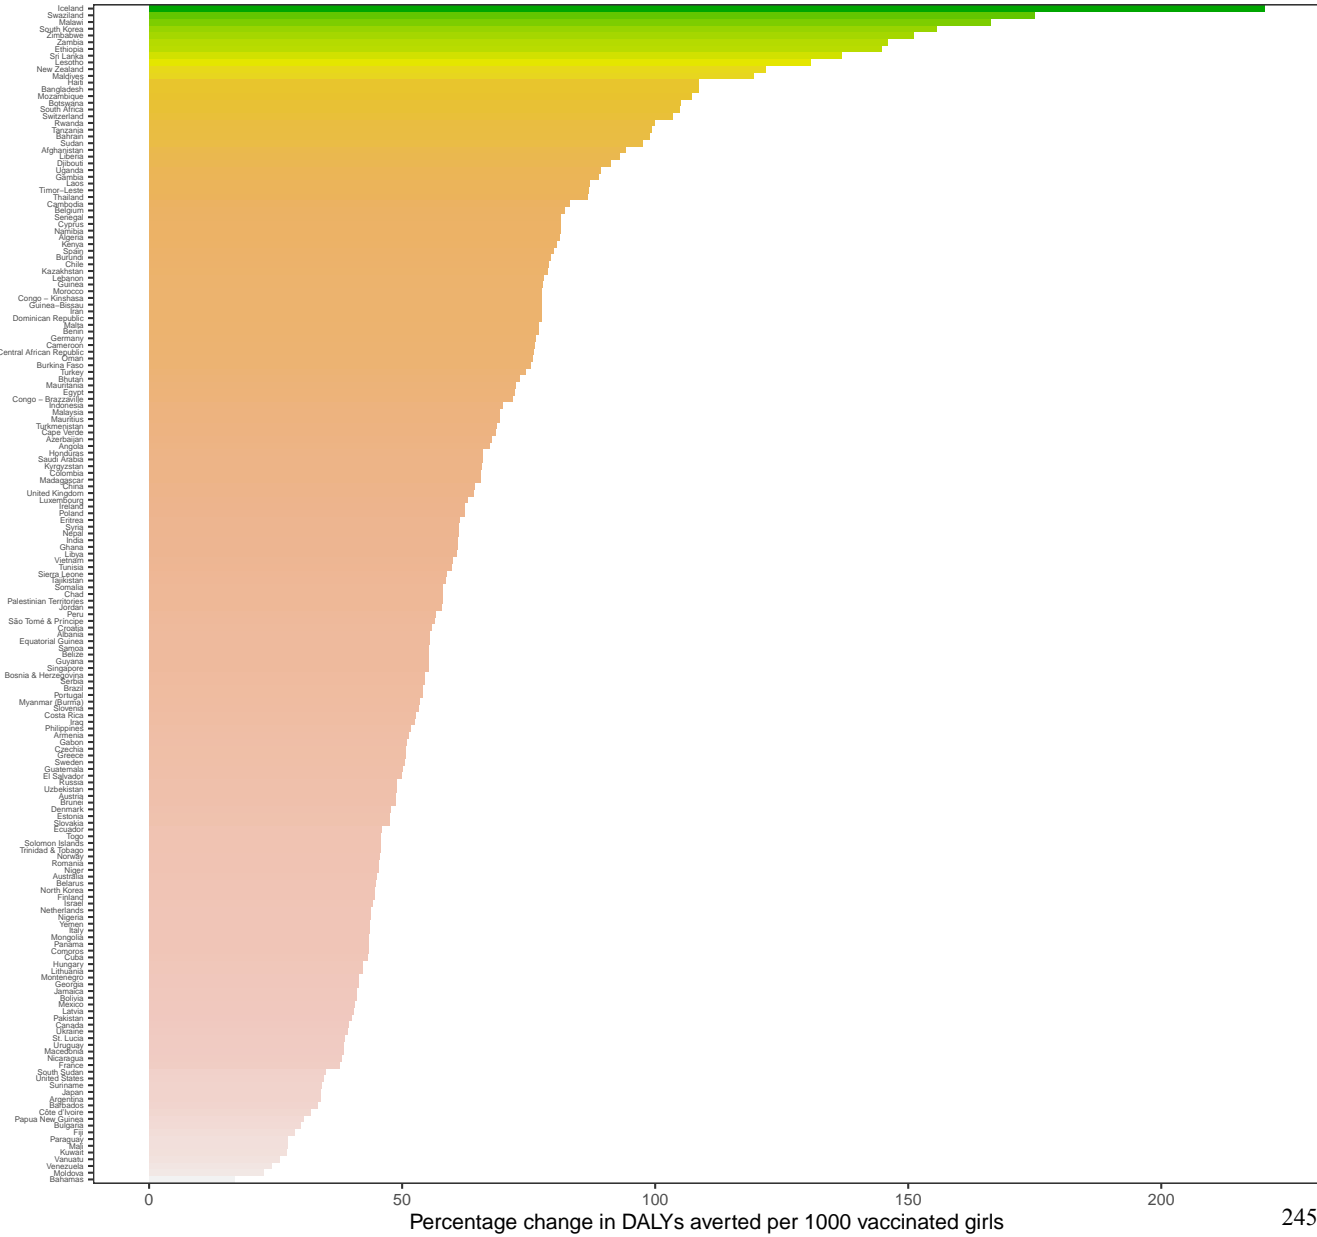





# Percentage change in YLDs averted per 1000 vaccinated girls (vaccination age = 9 years / bivalent/quadrivalent vaccine)

Comparison of scenario s3 in comparison to scenario s1

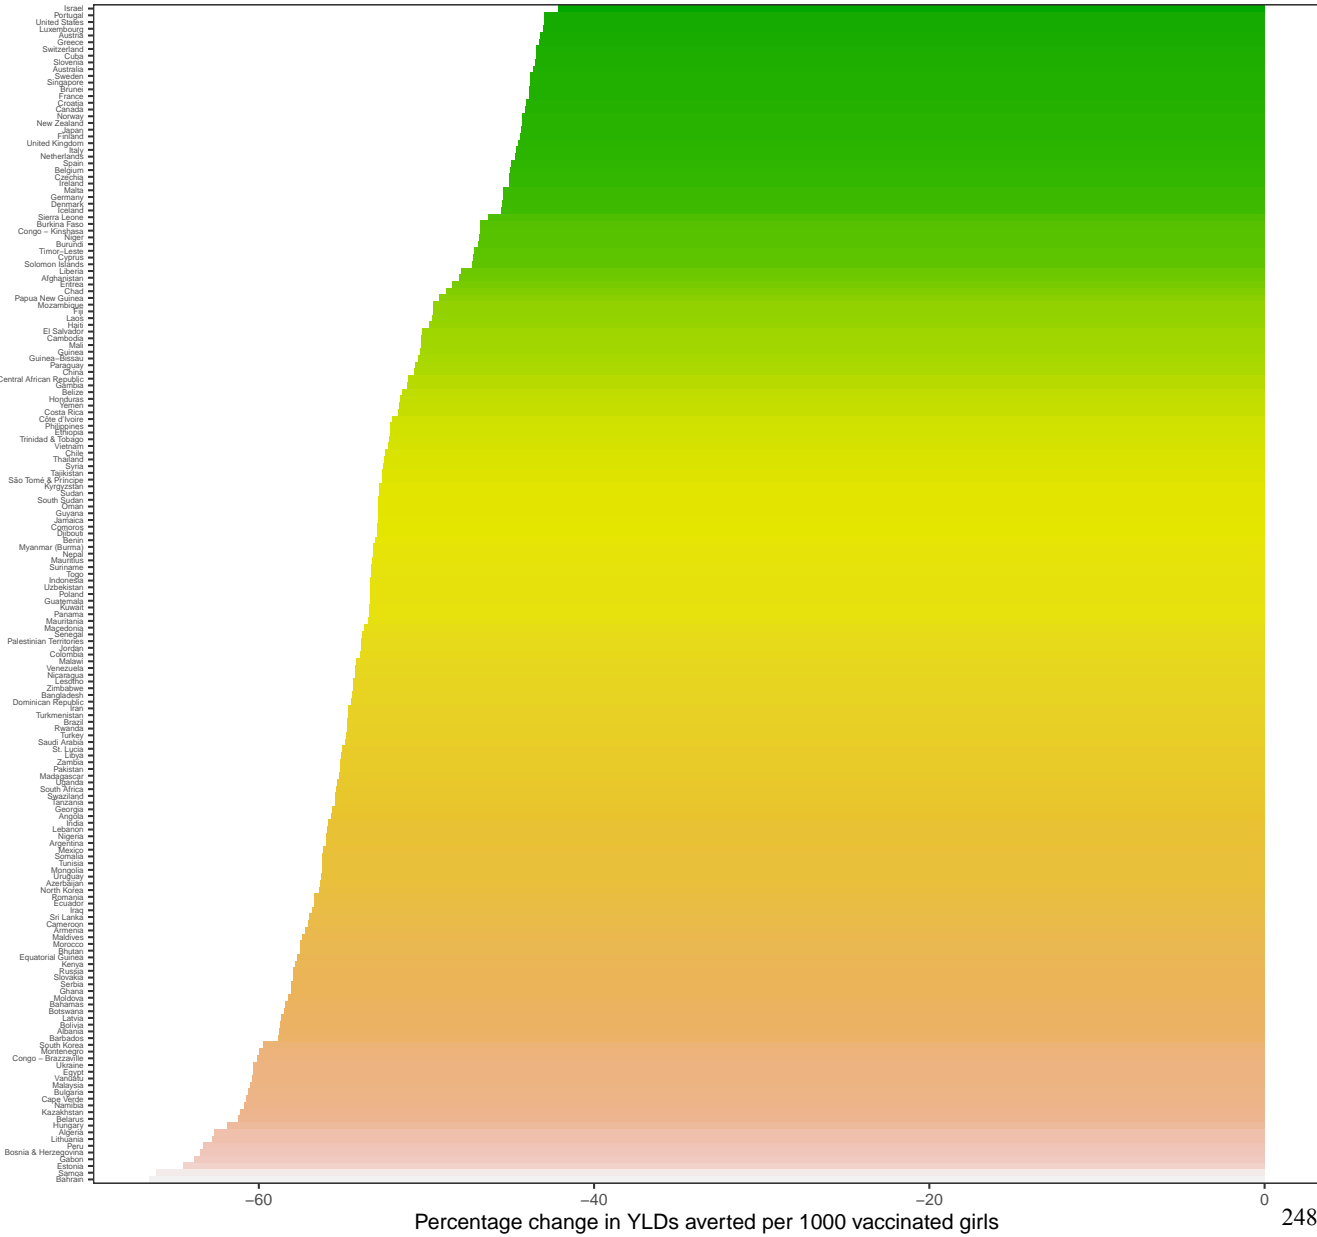





# Percentage change in DALYs averted per 1000 vaccinated girls (vaccination age = 9 years / bivalent/quadrivalent vaccine)

Comparison of scenario s3 in comparison to scenario s1

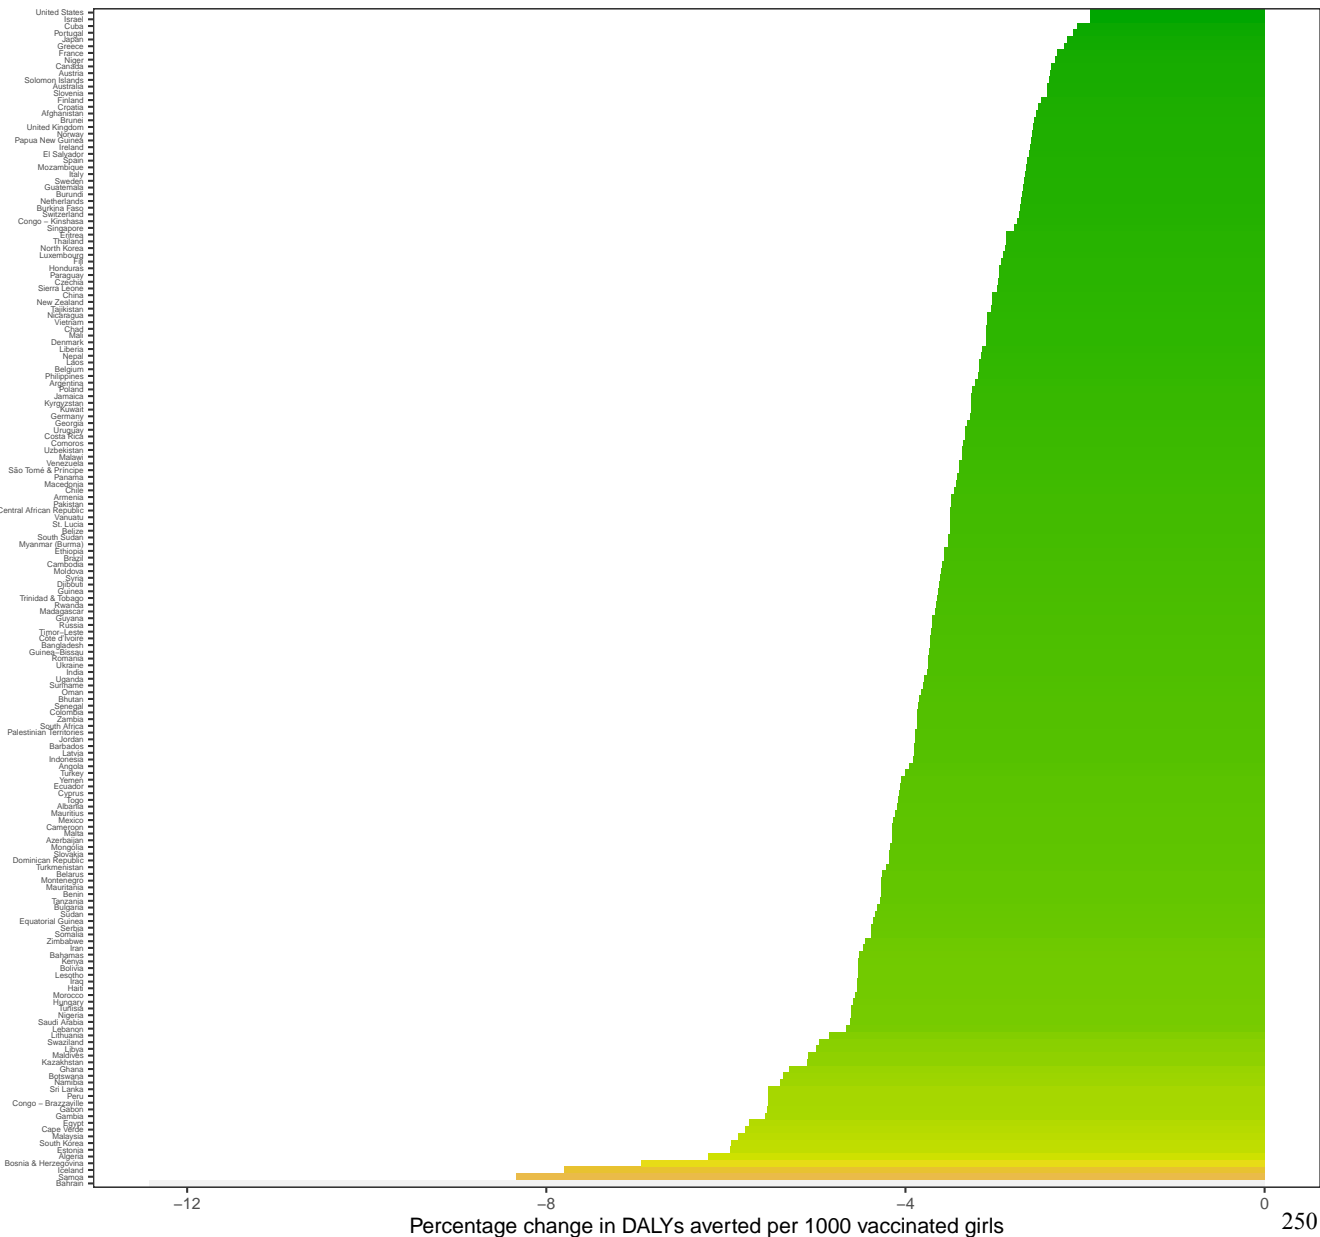

# Percentage change in cases averted per 1000 vaccinated girls (vaccination age = 9 years / bivalent/quadrivalent vaccine)

Comparison of scenario s4 in comparison to scenario s1

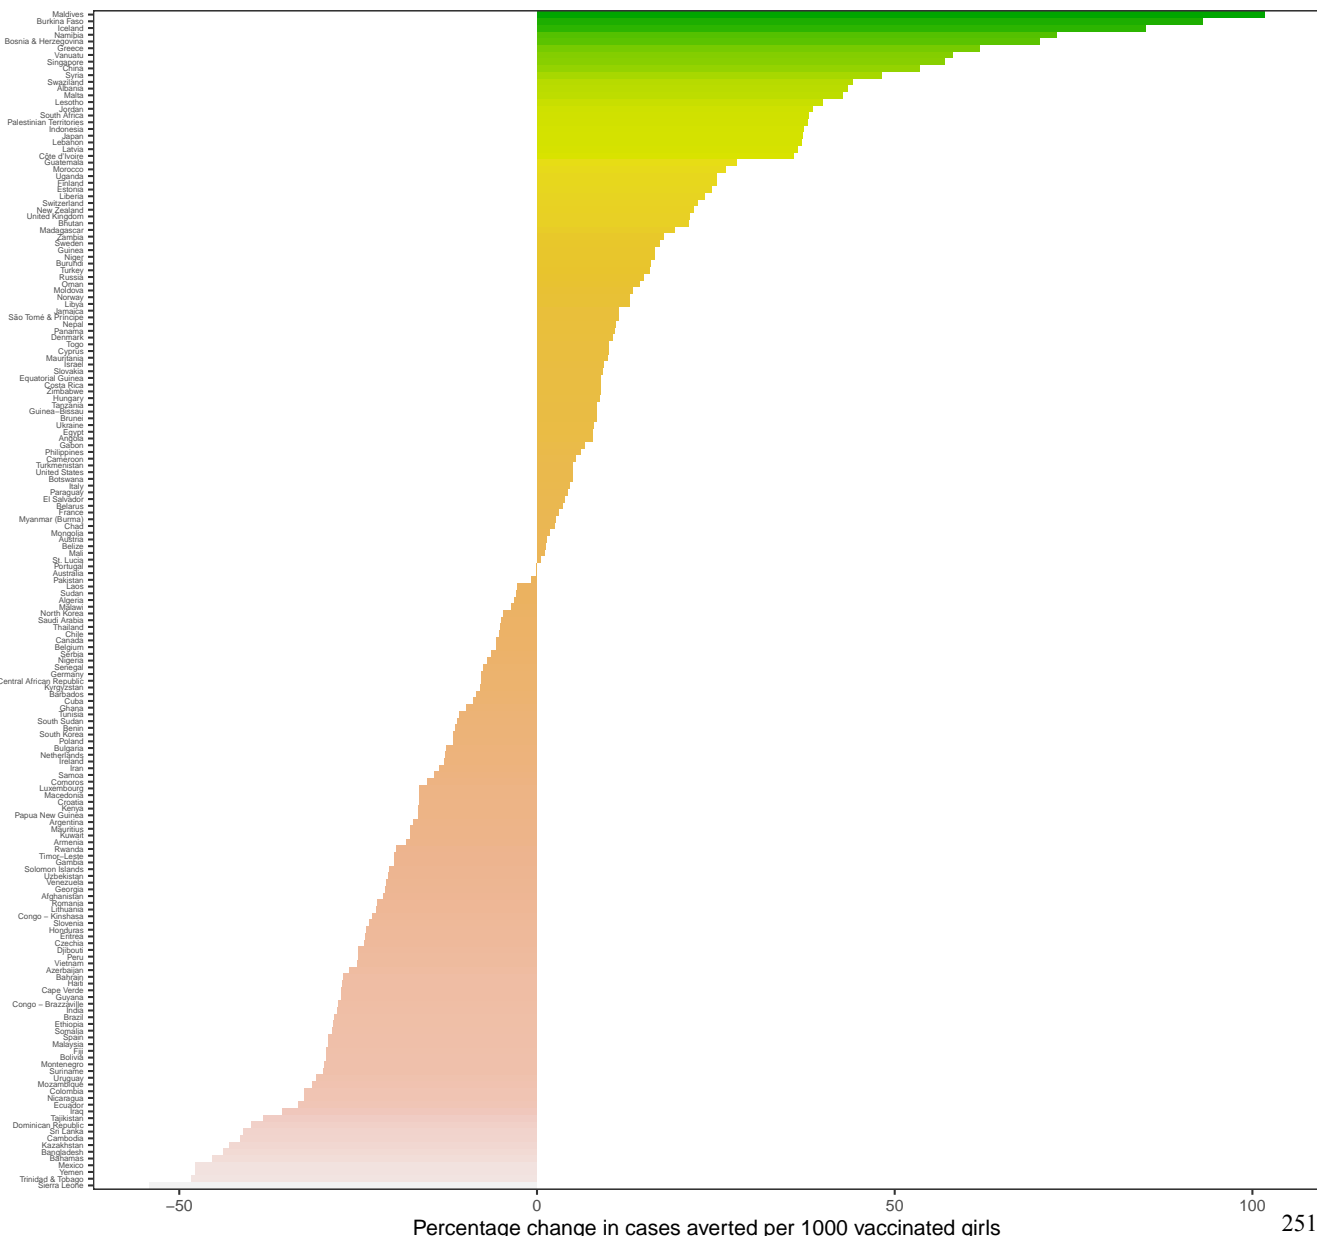

Percentage change in cases averted per 1000 vaccinated girls



# Percentage change in YLDs averted per 1000 vaccinated girls (vaccination age = 9 years / bivalent/quadrivalent vaccine)

Comparison of scenario s4 in comparison to scenario s1

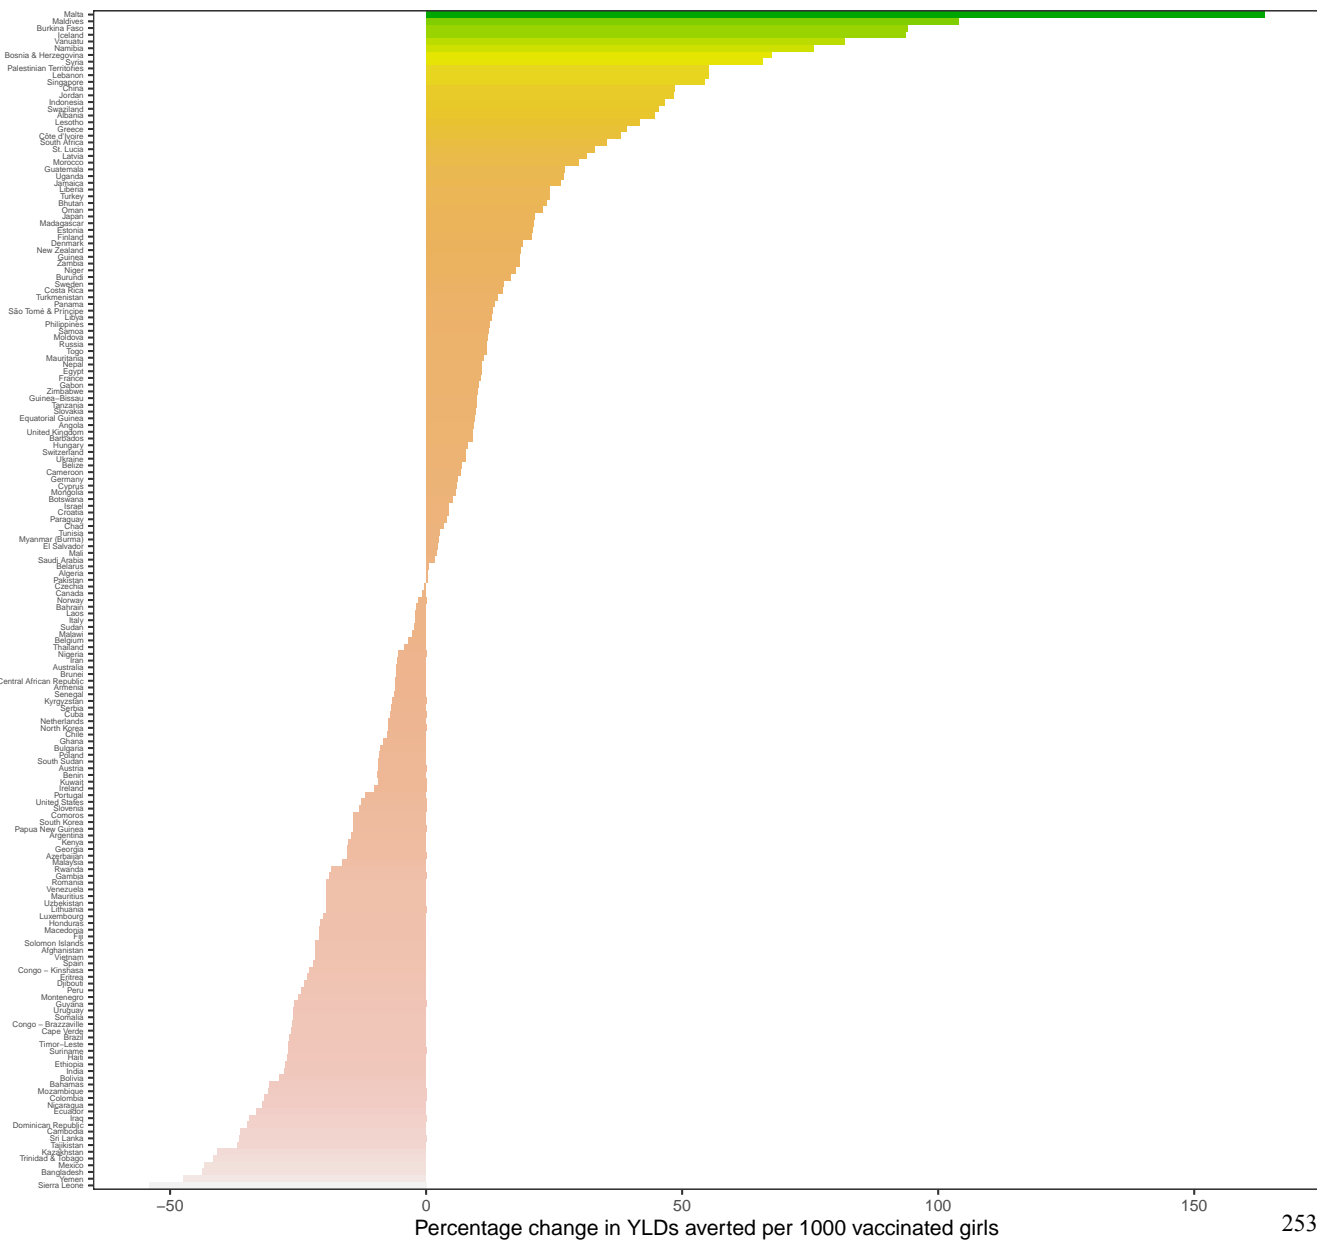

Percentage change in YLDs averted per 1000 vaccinated girls



# Percentage change in DALYs averted per 1000 vaccinated girls (vaccination age = 9 years / bivalent/quadrivalent vaccine)

Comparison of scenario s4 in comparison to scenario s1

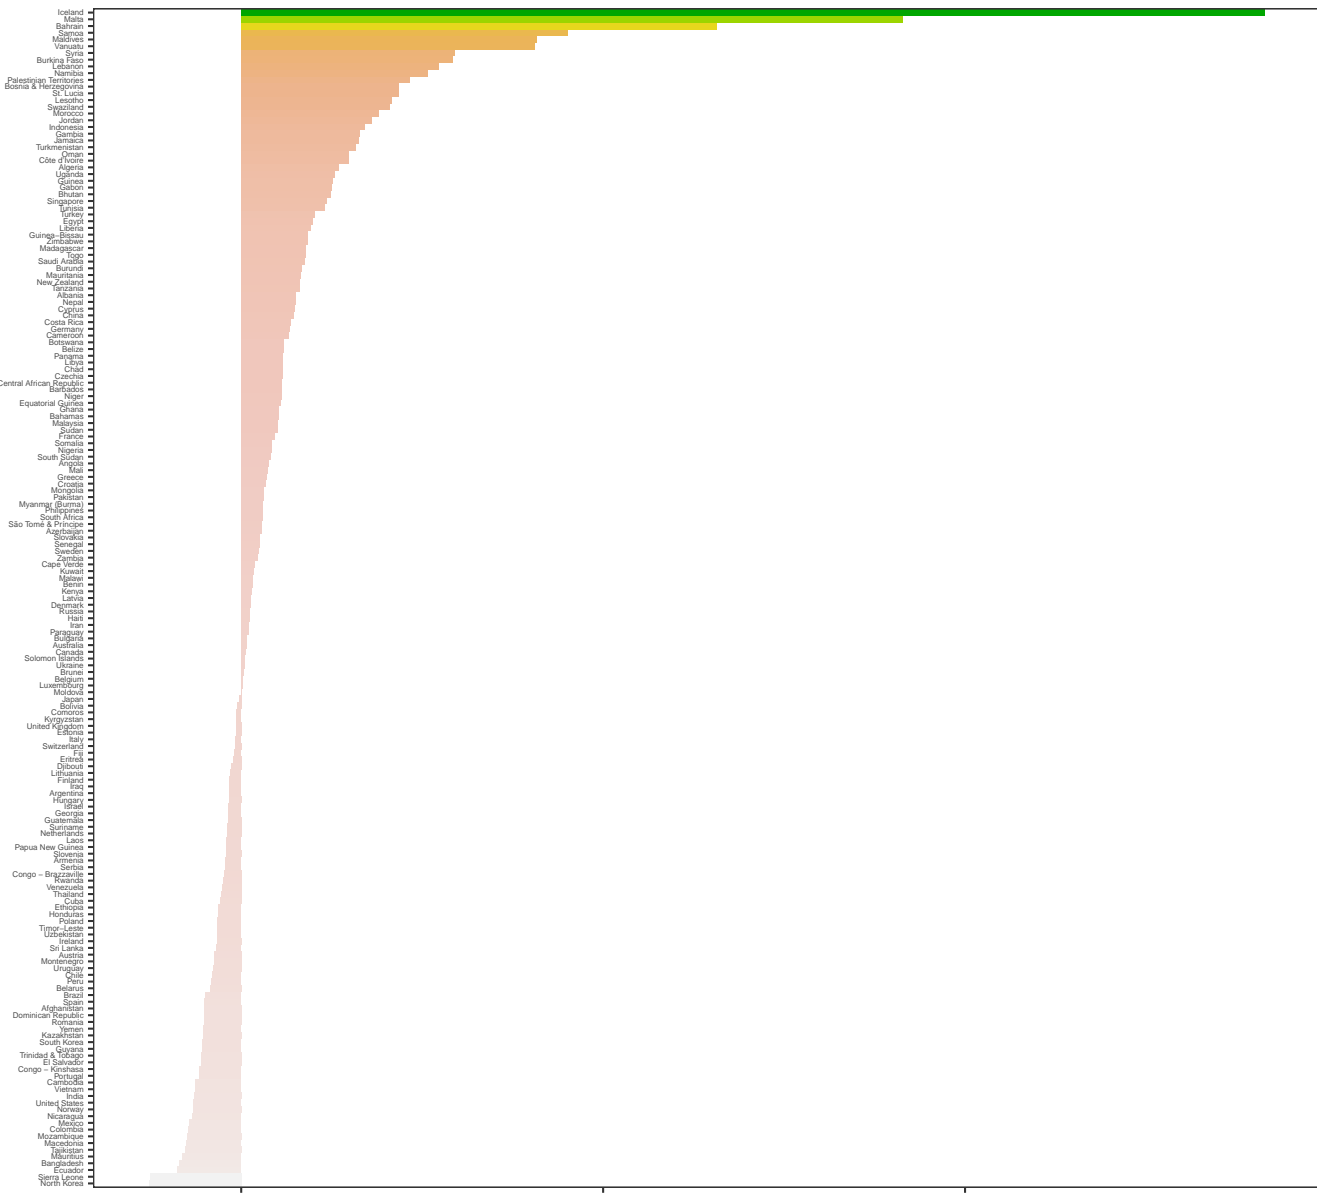

Percentage change in DALYs averted per 1000 vaccinated girls

# Percentage change in cases averted per 1000 vaccinated girls (vaccination age = 9 years / bivalent/quadrivalent vaccine)

Comparison of scenario s5 in comparison to scenario s1

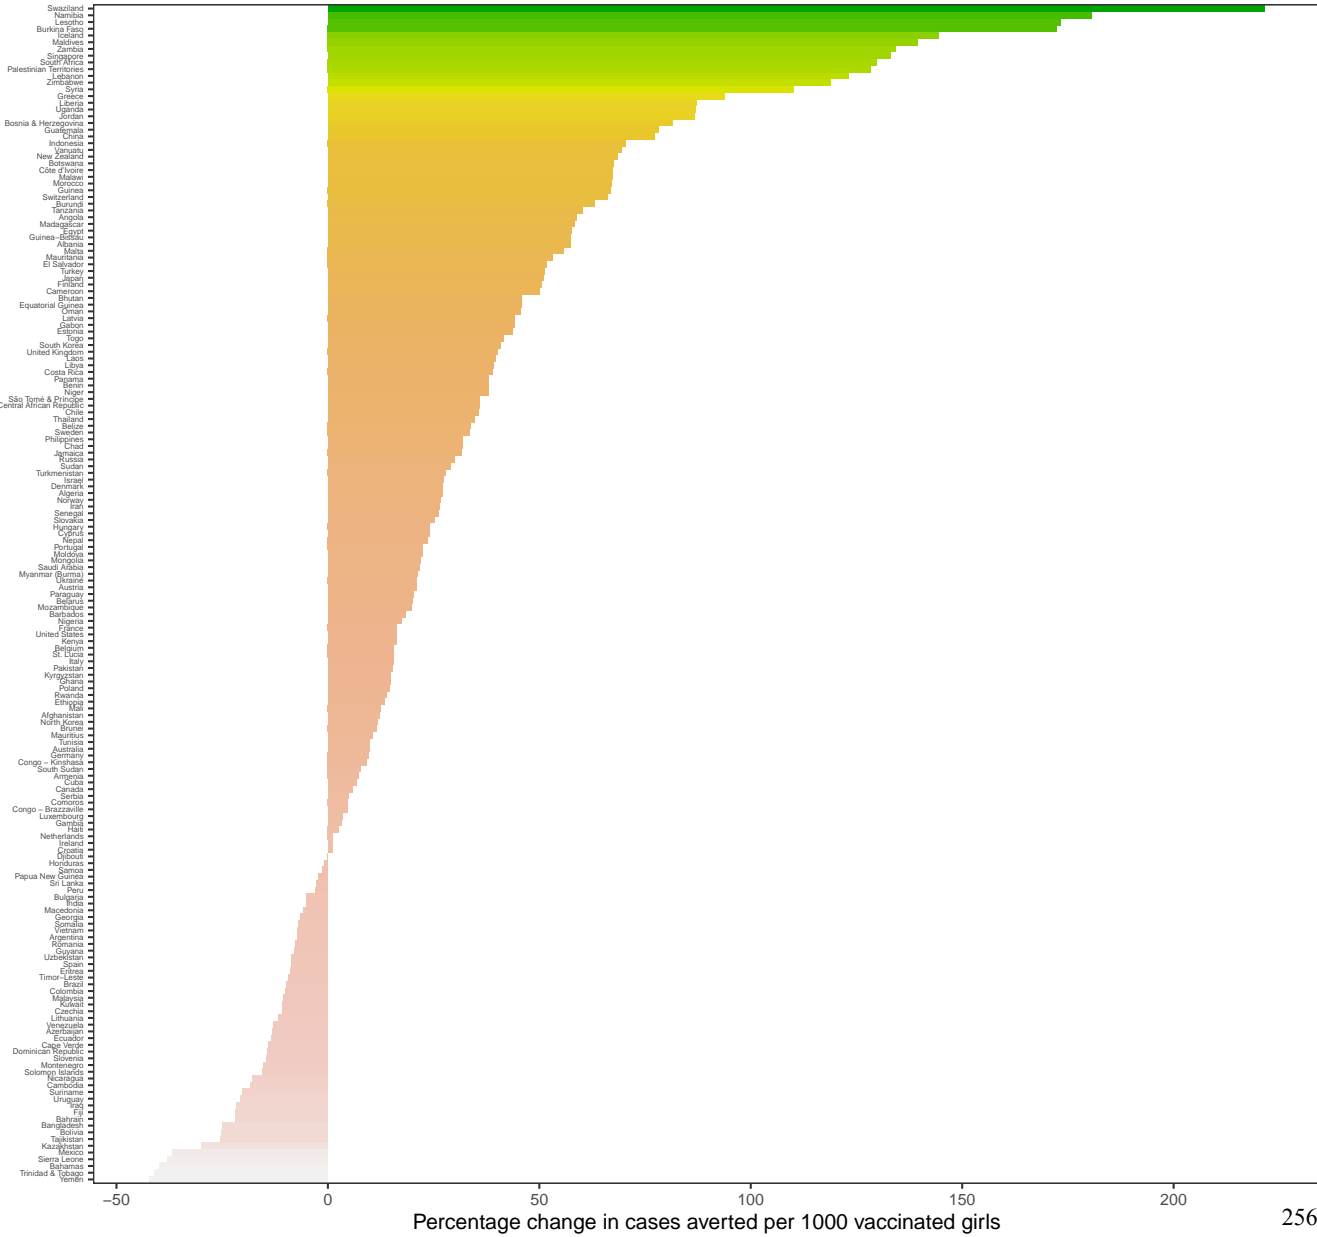

# Percentage change in deaths averted per 1000 vaccinated girls (vaccination age = 9 years / bivalent/quadrivalent vaccine)

Comparison of scenario s5 in comparison to scenario s1

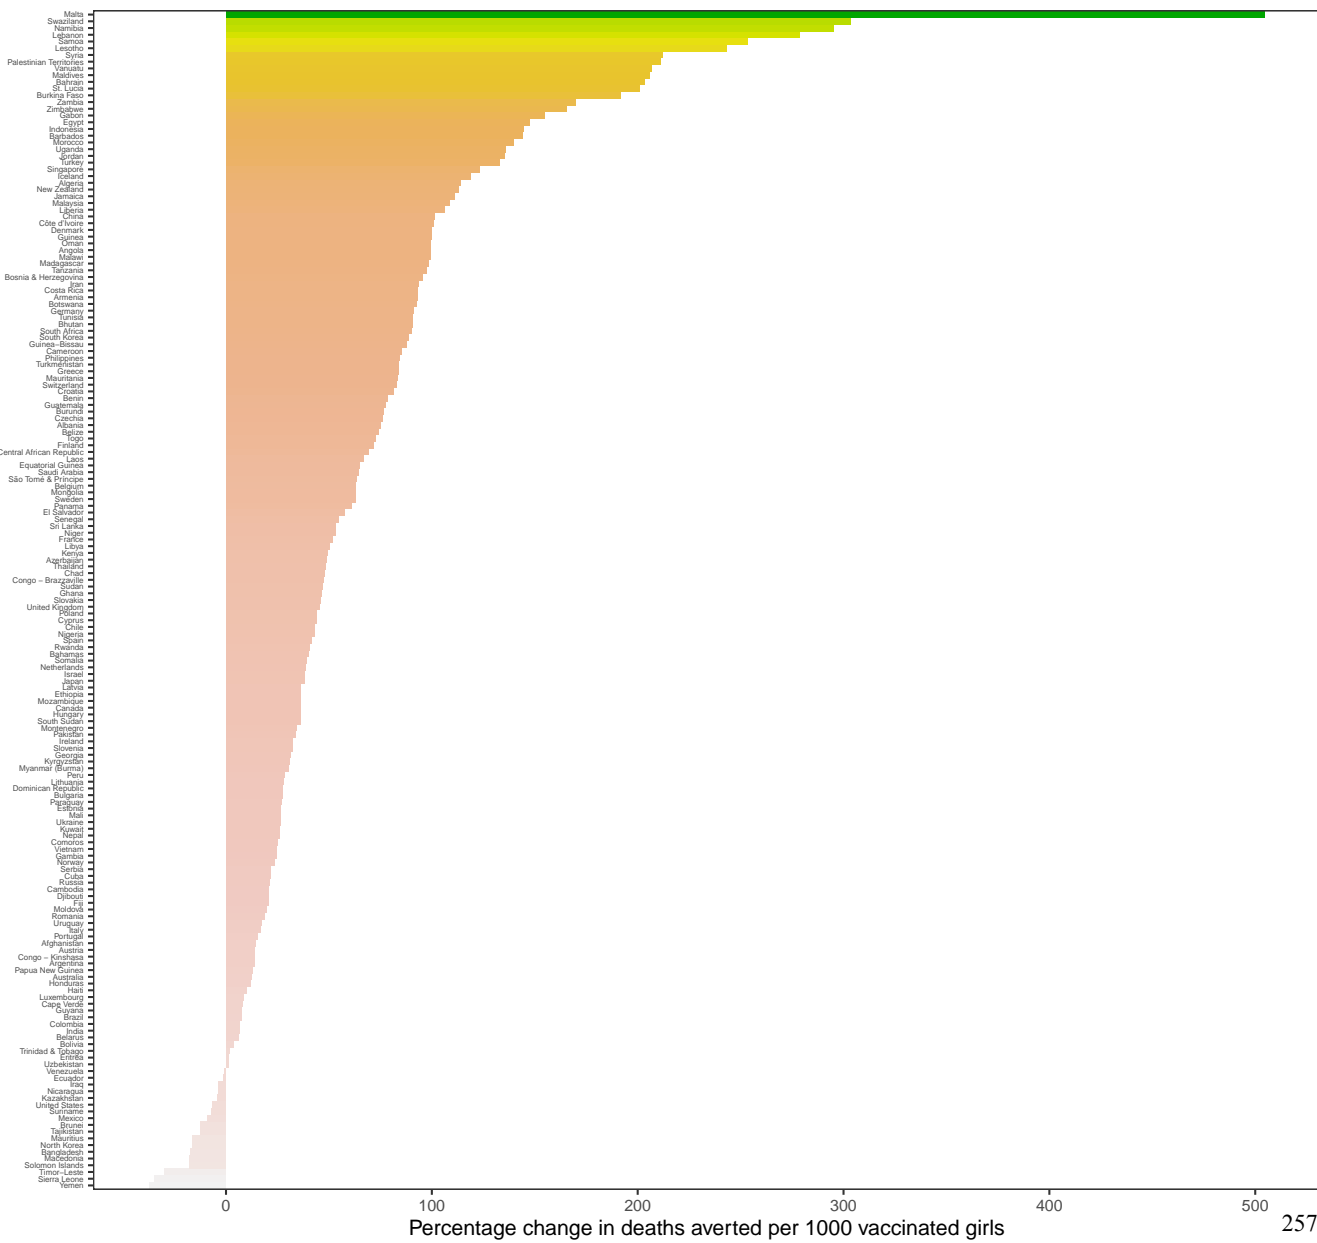

Percentage change in deaths averted per 1000 vaccinated girls



# Percentage change in YLDs averted per 1000 vaccinated girls (vaccination age = 9 years / bivalent/quadrivalent vaccine)

Comparison of scenario s5 in comparison to scenario s1

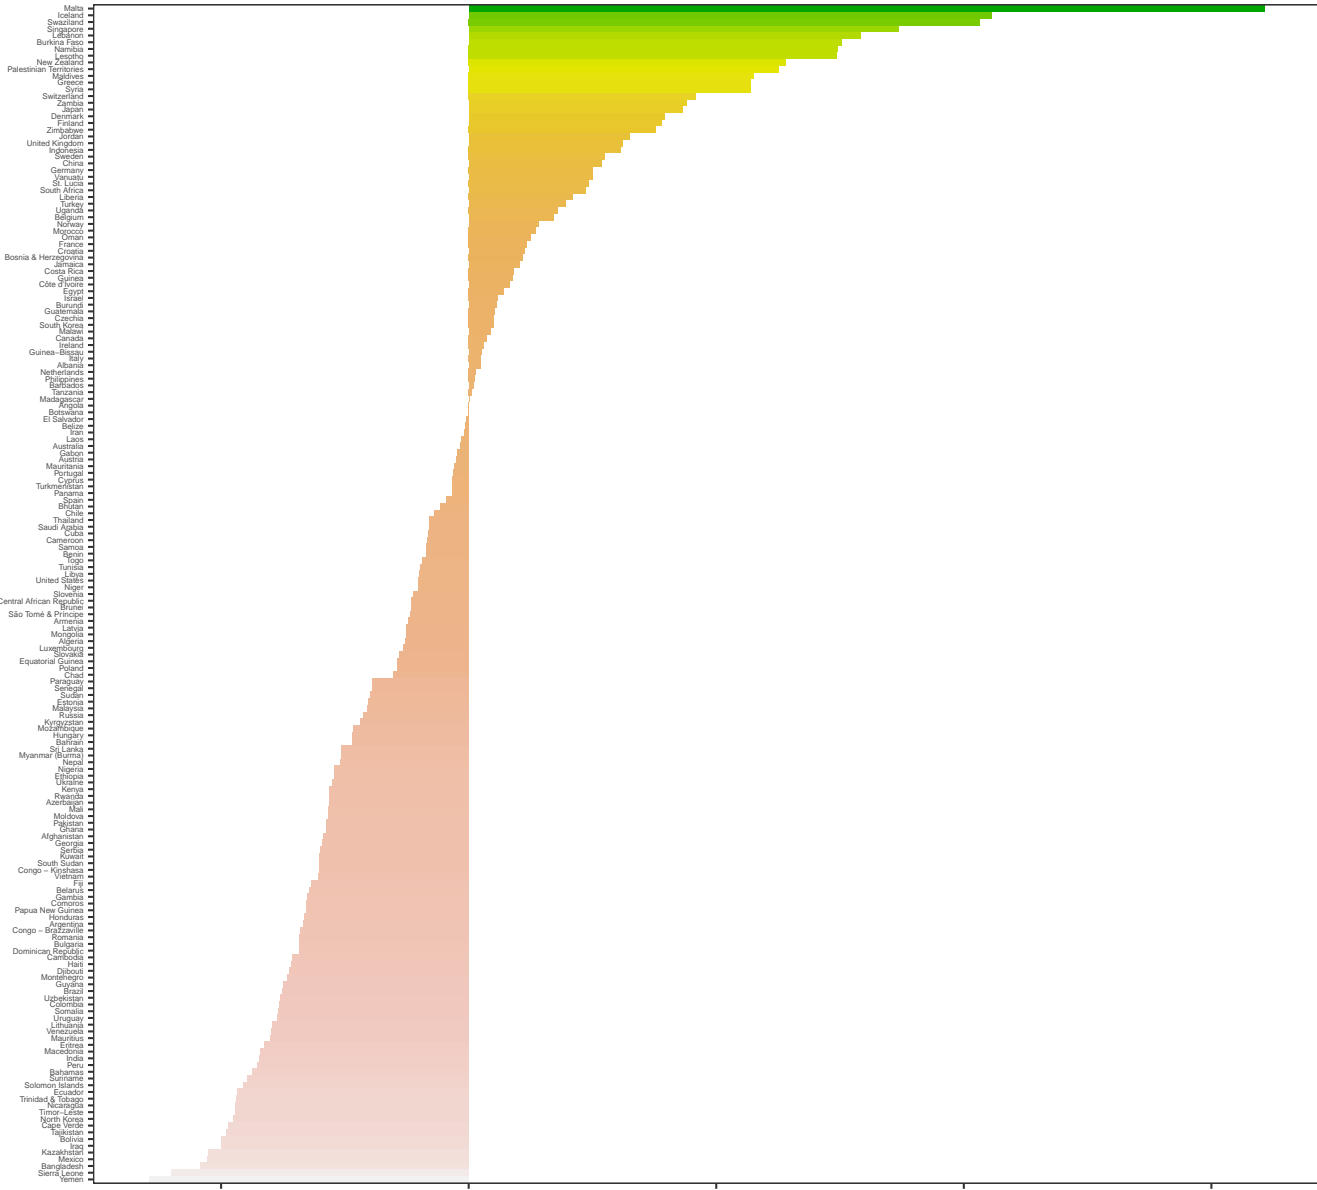

Percentage change in YLDs averted per 1000 vaccinated girls







# Percentage change in deaths averted per 1000 vaccinated girls (vaccination age = 9 years / nonavalent vaccine)

Comparison of scenario s2 in comparison to scenario s1



Percentage change in deaths averted per 1000 vaccinated girls





# Percentage change in DALYs averted per 1000 vaccinated girls (vaccination age = 9 years / nonavalent vaccine)

Comparison of scenario s2 in comparison to scenario s1

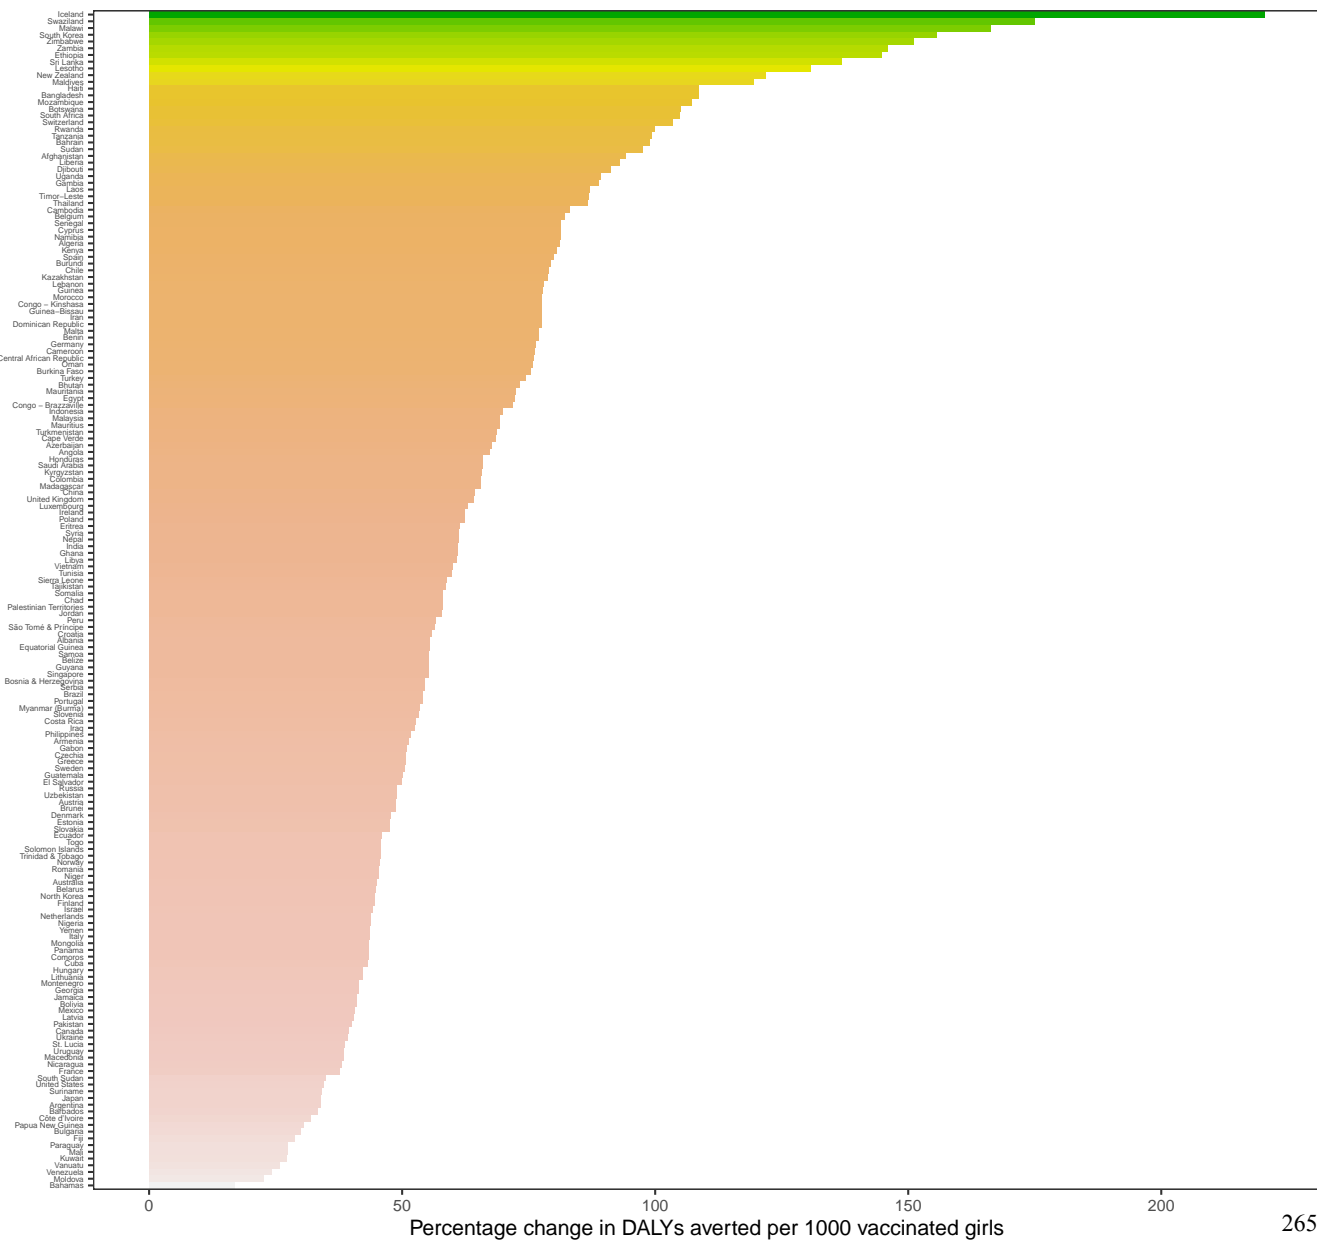







# Percentage change in YLDs averted per 1000 vaccinated girls (vaccination age = 9 years / nonavalent vaccine)

Comparison of scenario s3 in comparison to scenario s1

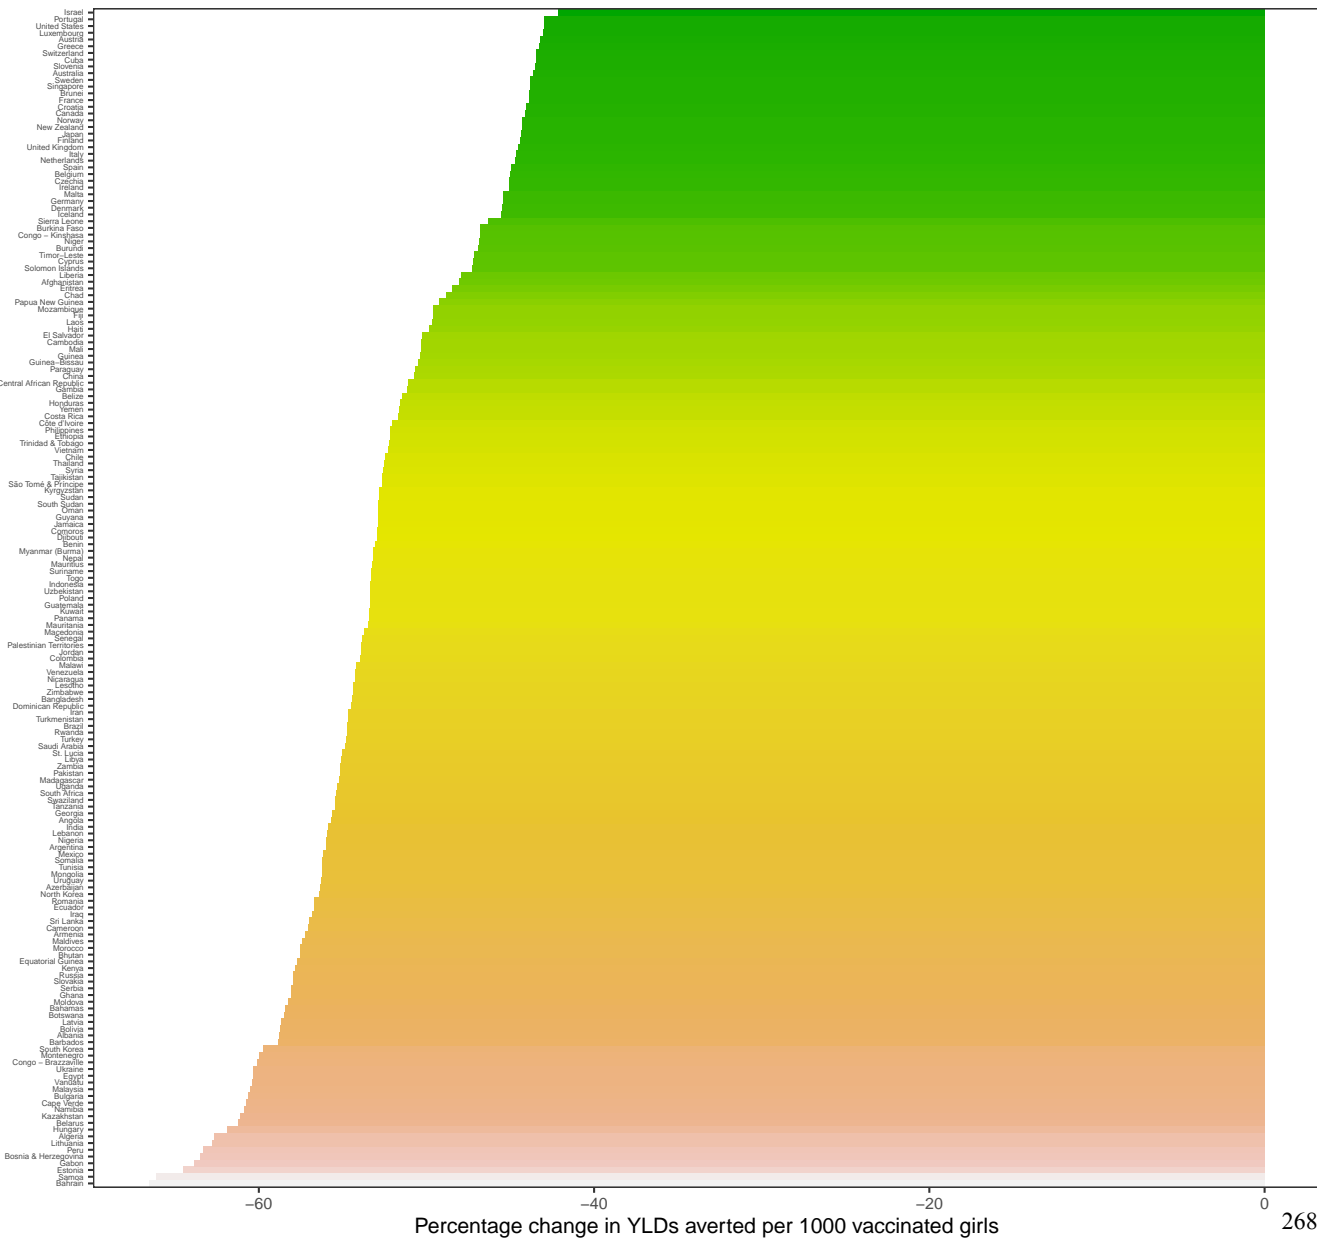



# Percentage change in DALYs averted per 1000 vaccinated girls (vaccination age = 9 years / nonavalent vaccine)

Comparison of scenario s3 in comparison to scenario s1

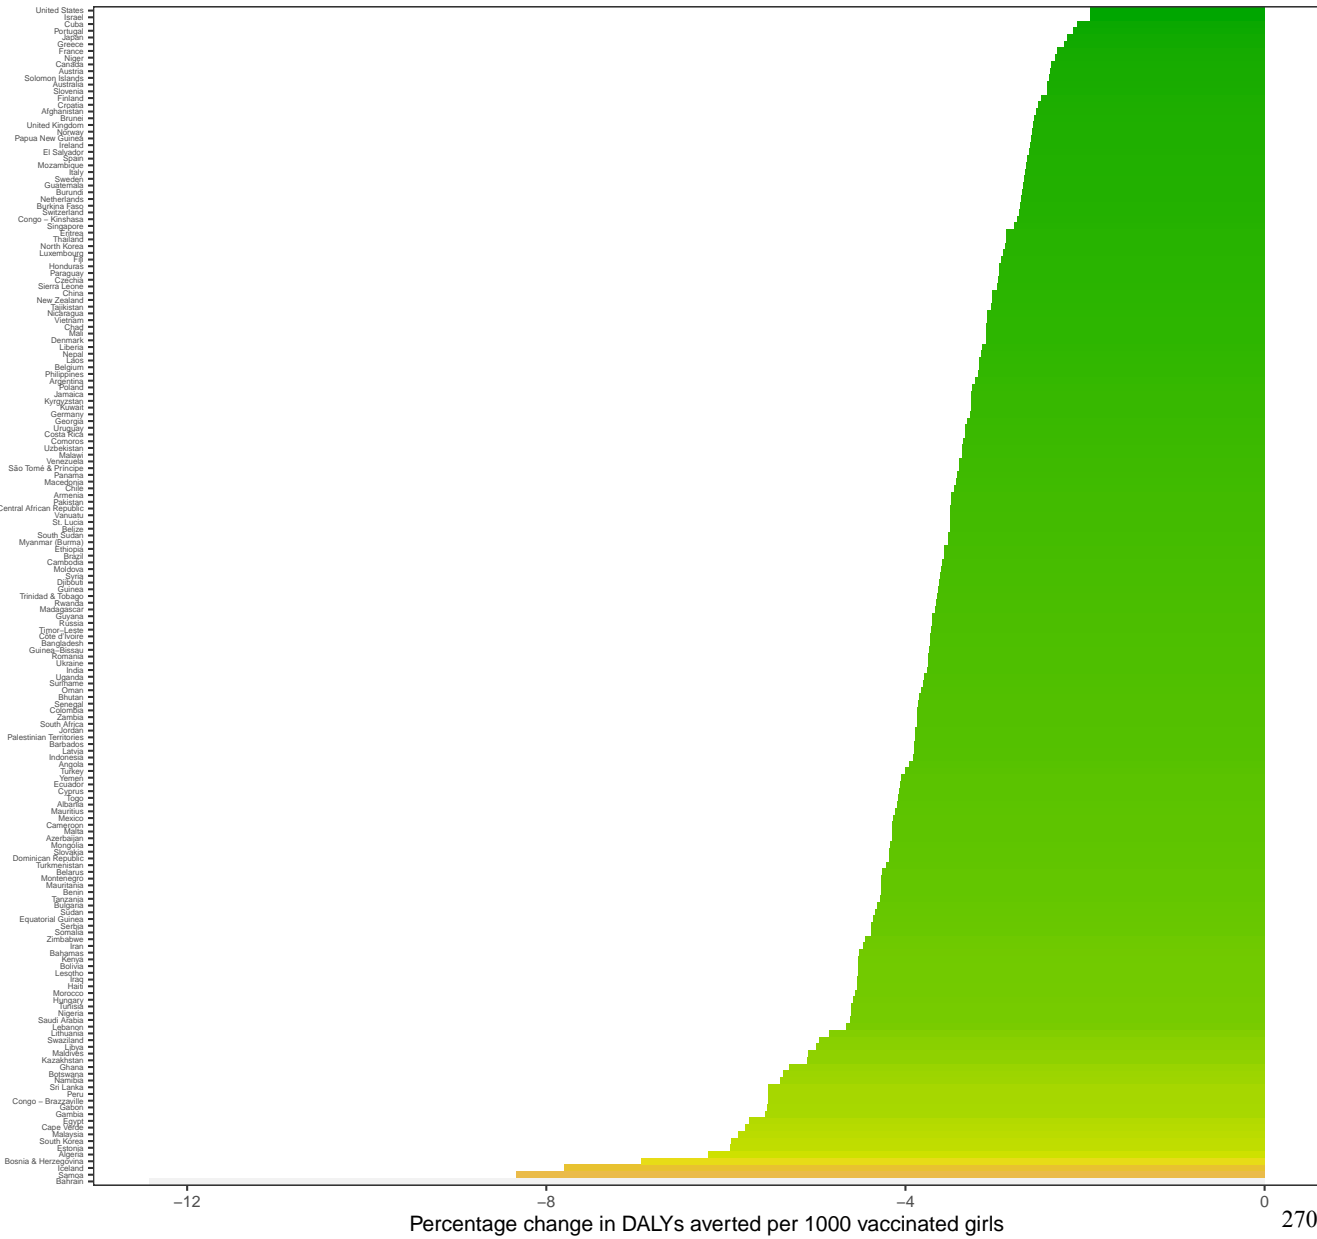

# Percentage change in cases averted per 1000 vaccinated girls (vaccination age = 9 years / nonavalent vaccine)

Comparison of scenario s4 in comparison to scenario s1

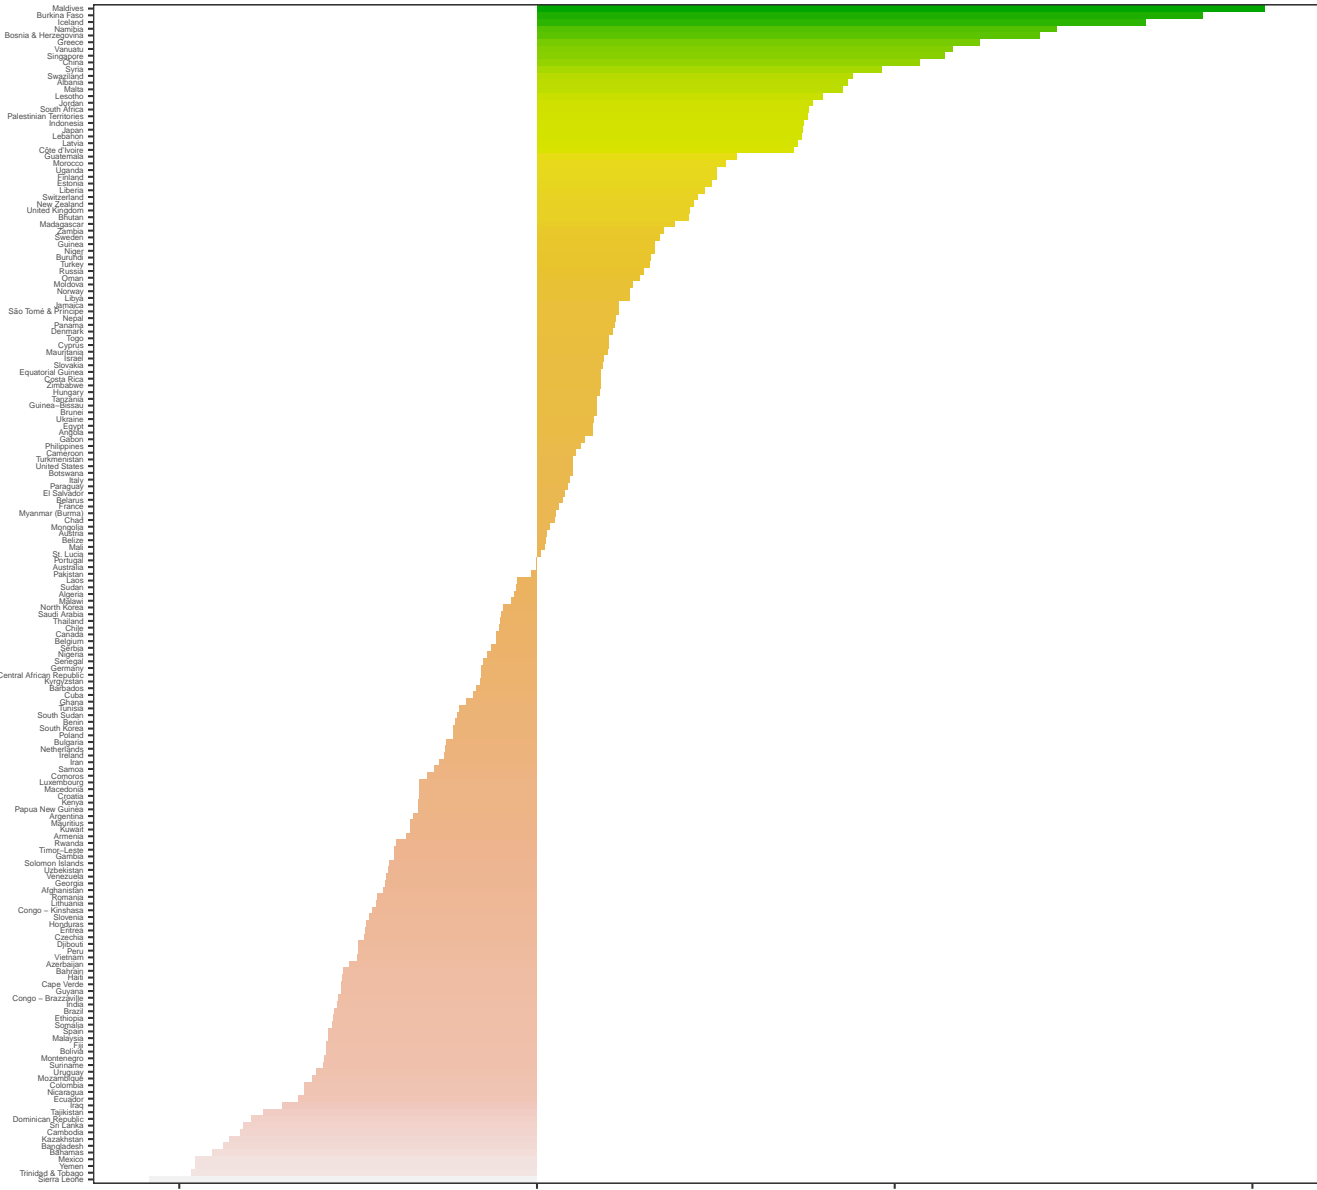

Percentage change in cases averted per 1000 vaccinated girls

# Percentage change in deaths averted per 1000 vaccinated girls (vaccination age = 9 years / nonavalent vaccine)

Comparison of scenario s4 in comparison to scenario s1

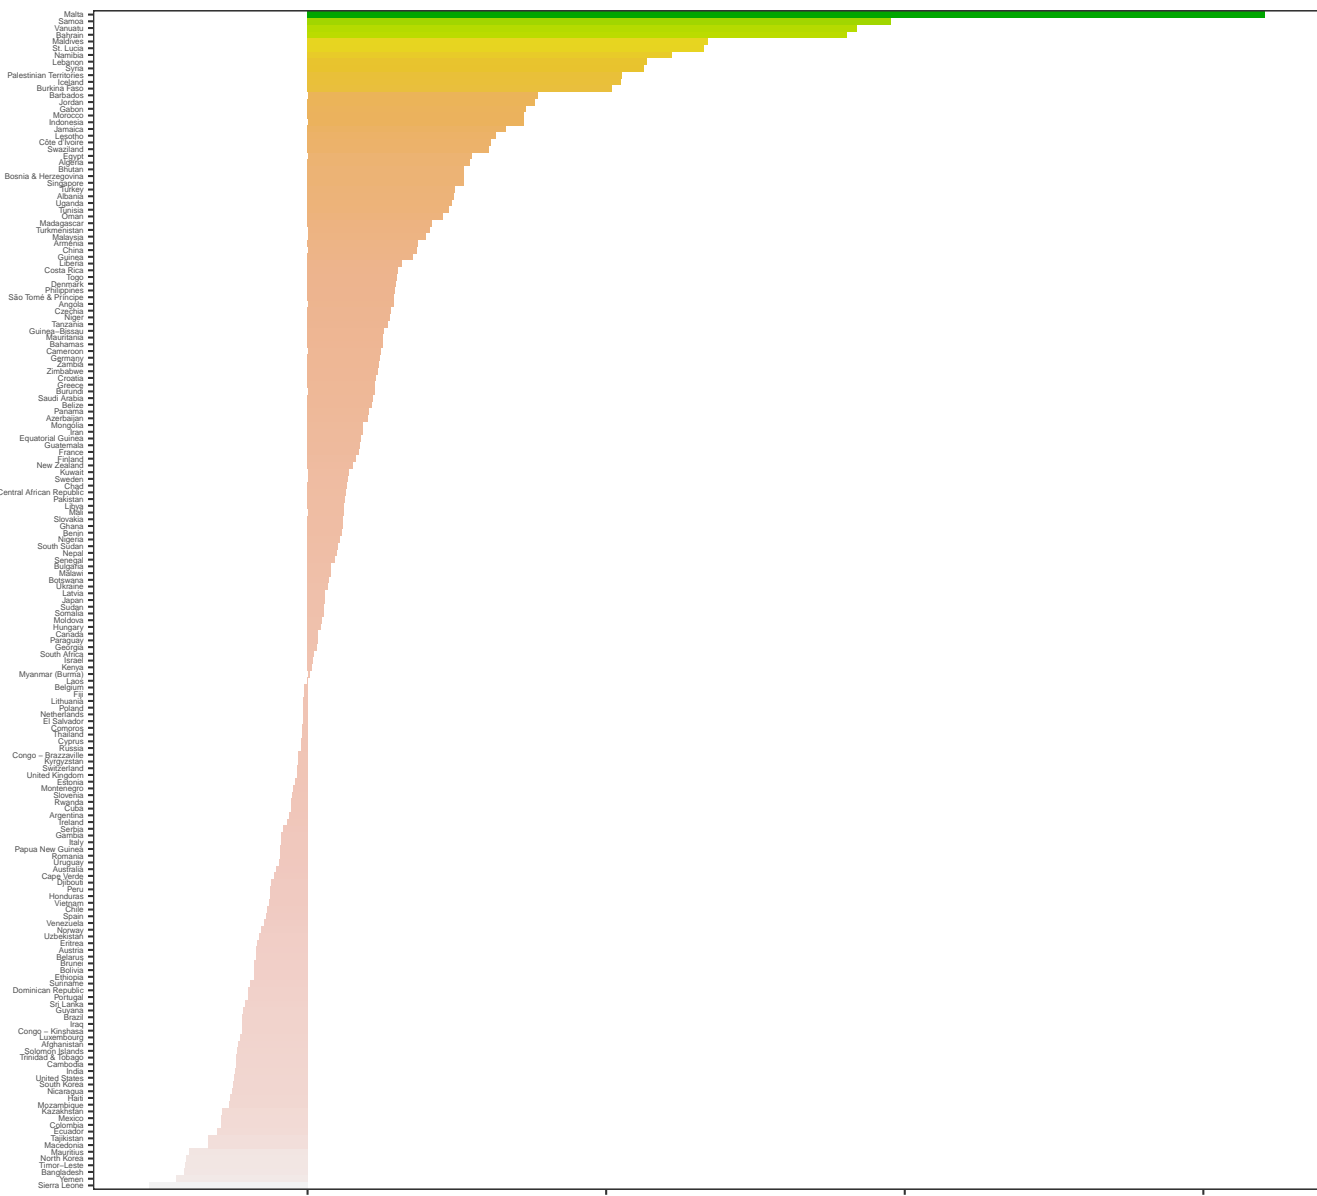

Percentage change in deaths averted per 1000 vaccinated girls

# Percentage change in YLDs averted per 1000 vaccinated girls (vaccination age = 9 years / nonavalent vaccine)

Comparison of scenario s4 in comparison to scenario s1

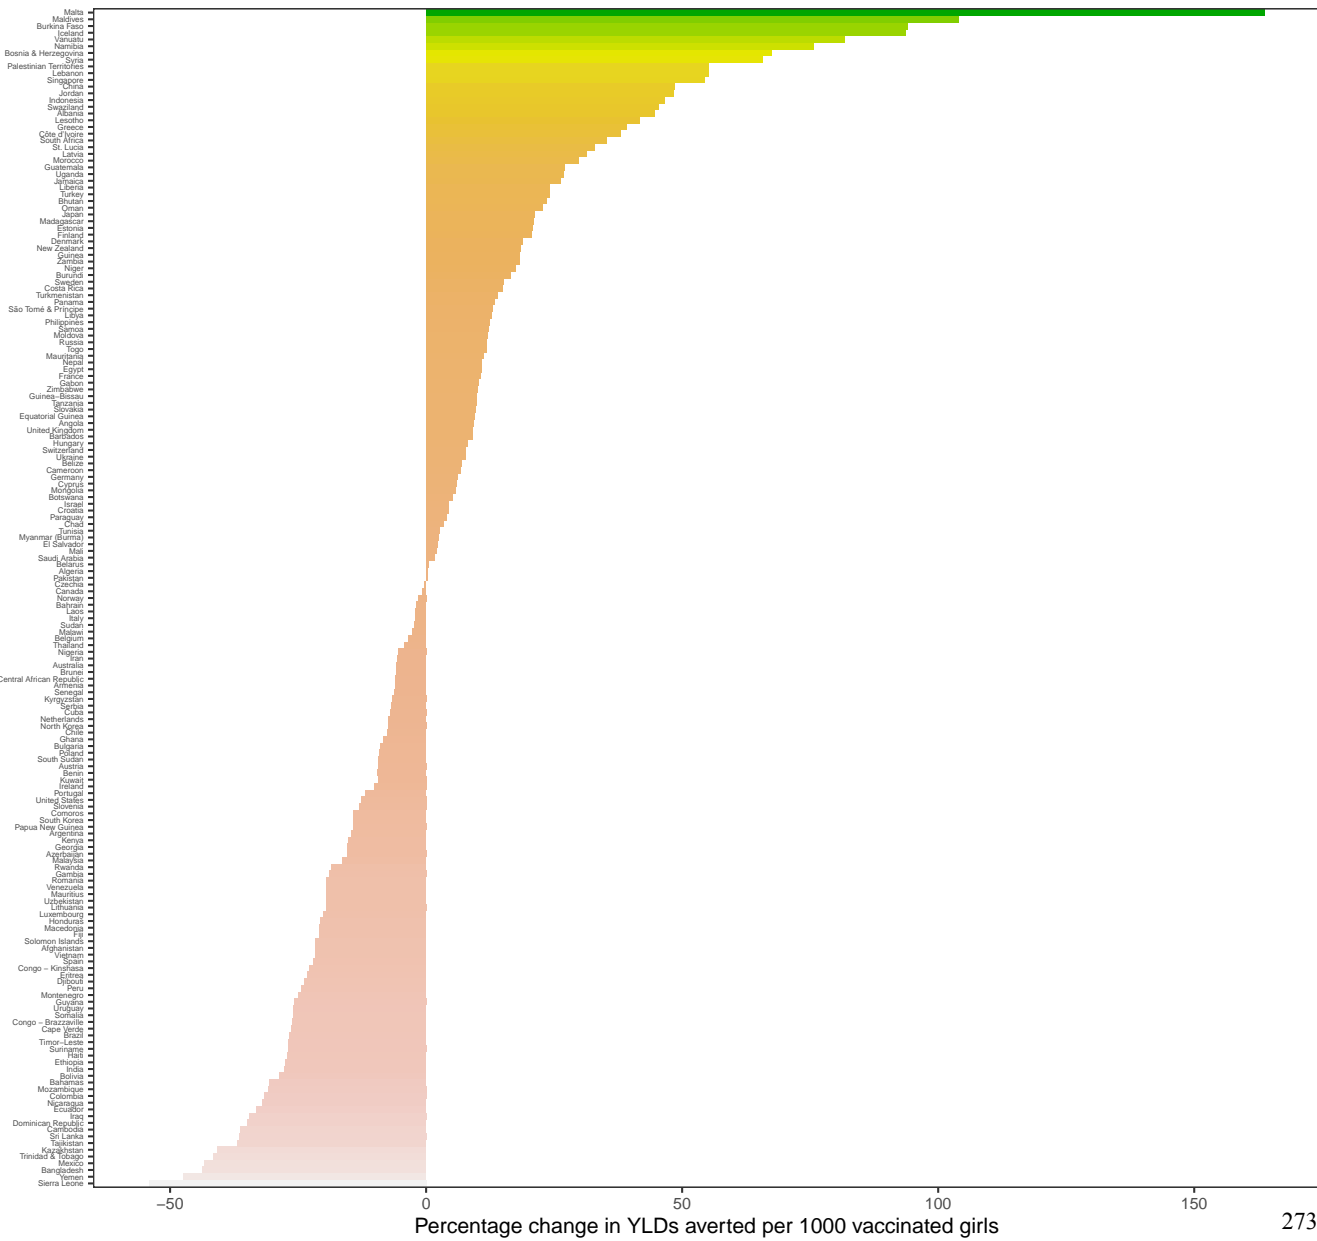







# Percentage change in cases averted per 1000 vaccinated girls (vaccination age = 9 years / nonavalent vaccine)

Comparison of scenario s5 in comparison to scenario s1

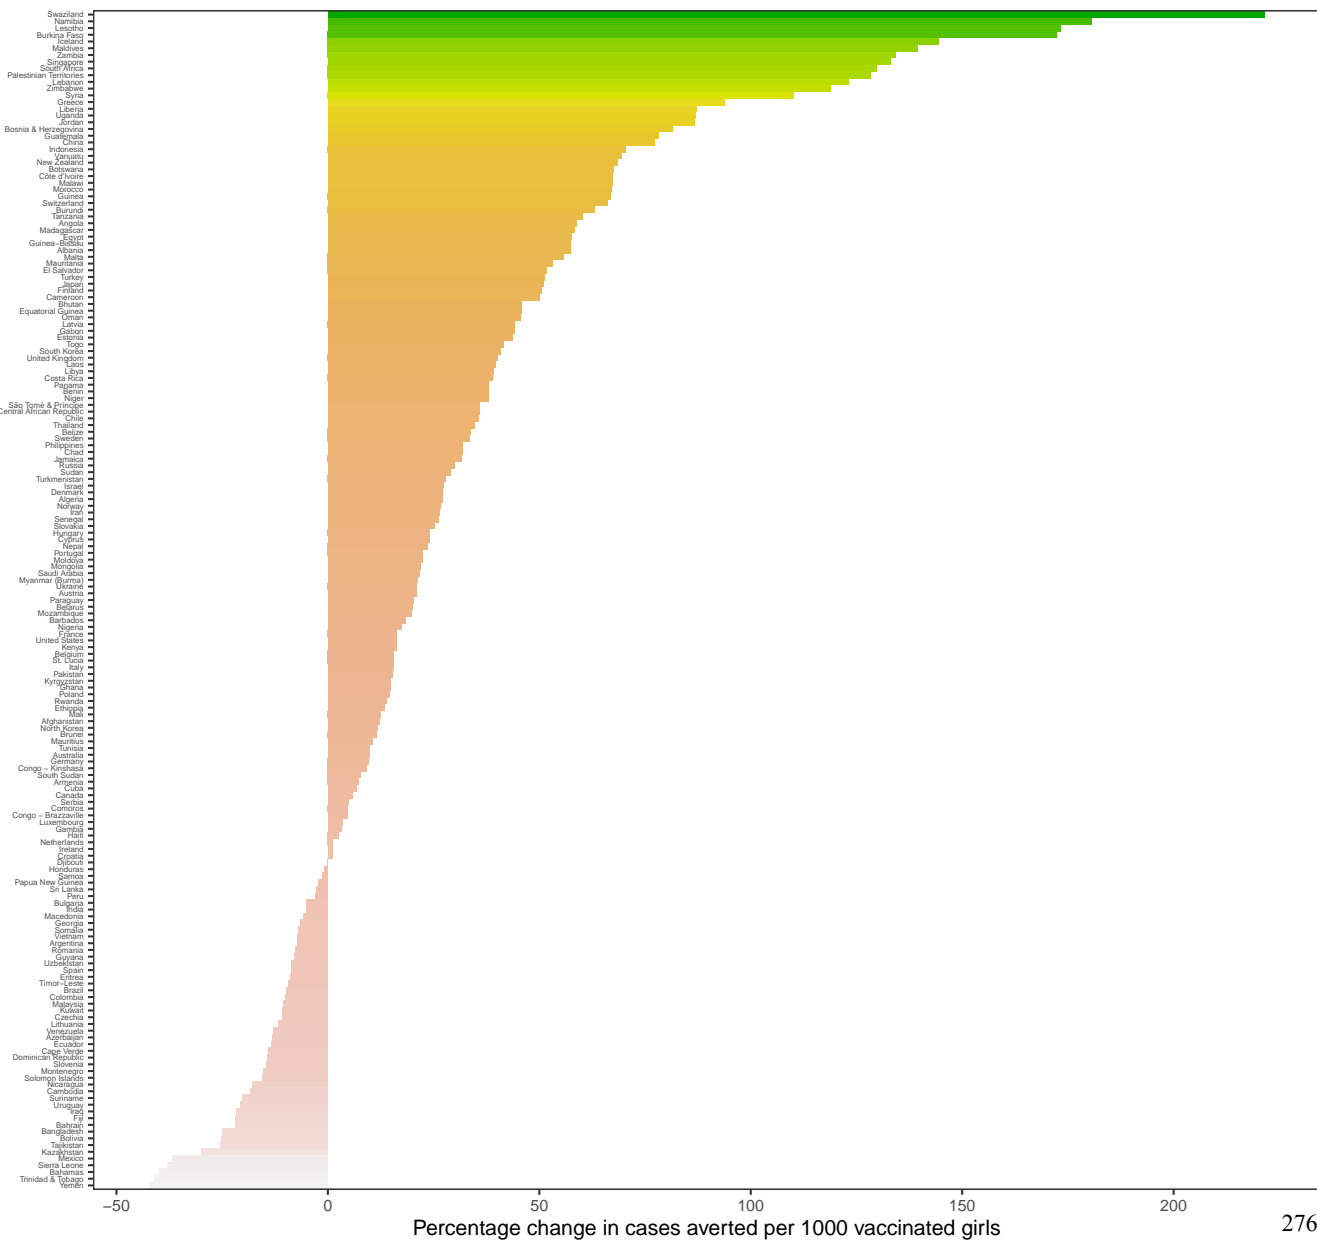

# Percentage change in deaths averted per 1000 vaccinated girls (vaccination age = 9 years / nonavalent vaccine)

Comparison of scenario s5 in comparison to scenario s1

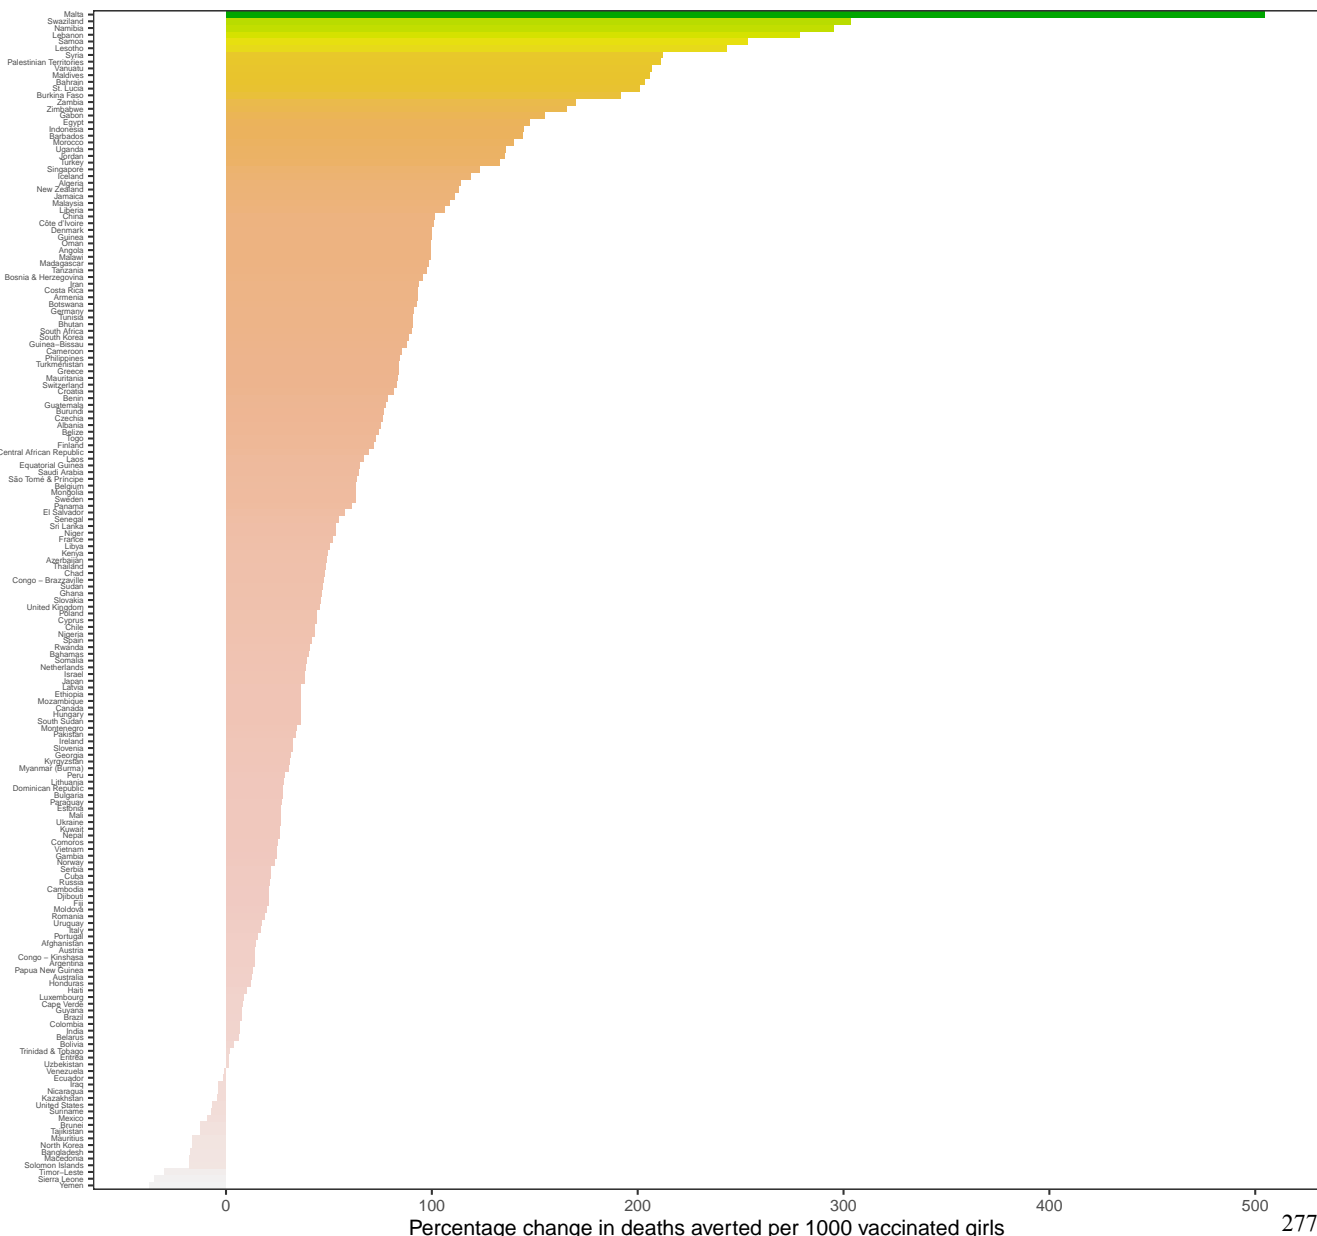

Percentage change in deaths averted per 1000 vaccinated girls

# Percentage change in YLDs averted per 1000 vaccinated girls (vaccination age = 9 years / nonavalent vaccine)

Comparison of scenario s5 in comparison to scenario s1

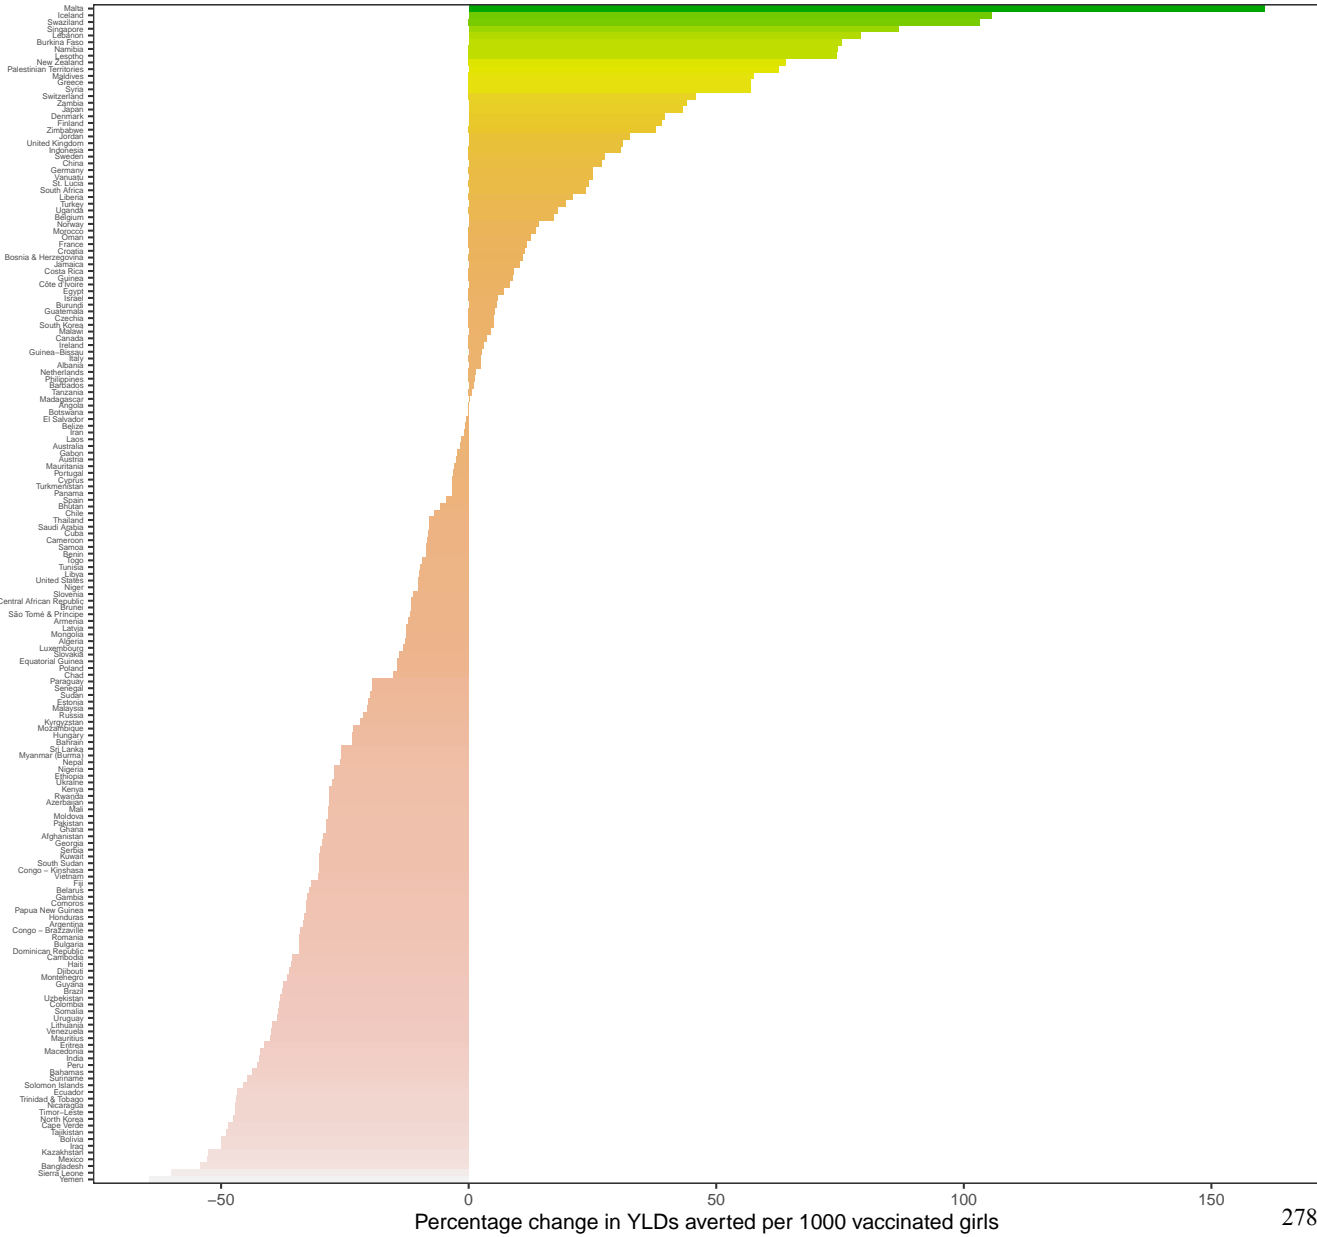

Percentage change in YLDs averted per 1000 vaccinated girls



# Percentage change in DALYs averted per 1000 vaccinated girls (vaccination age = 9 years / nonavalent vaccine)

Comparison of scenario s5 in comparison to scenario s1

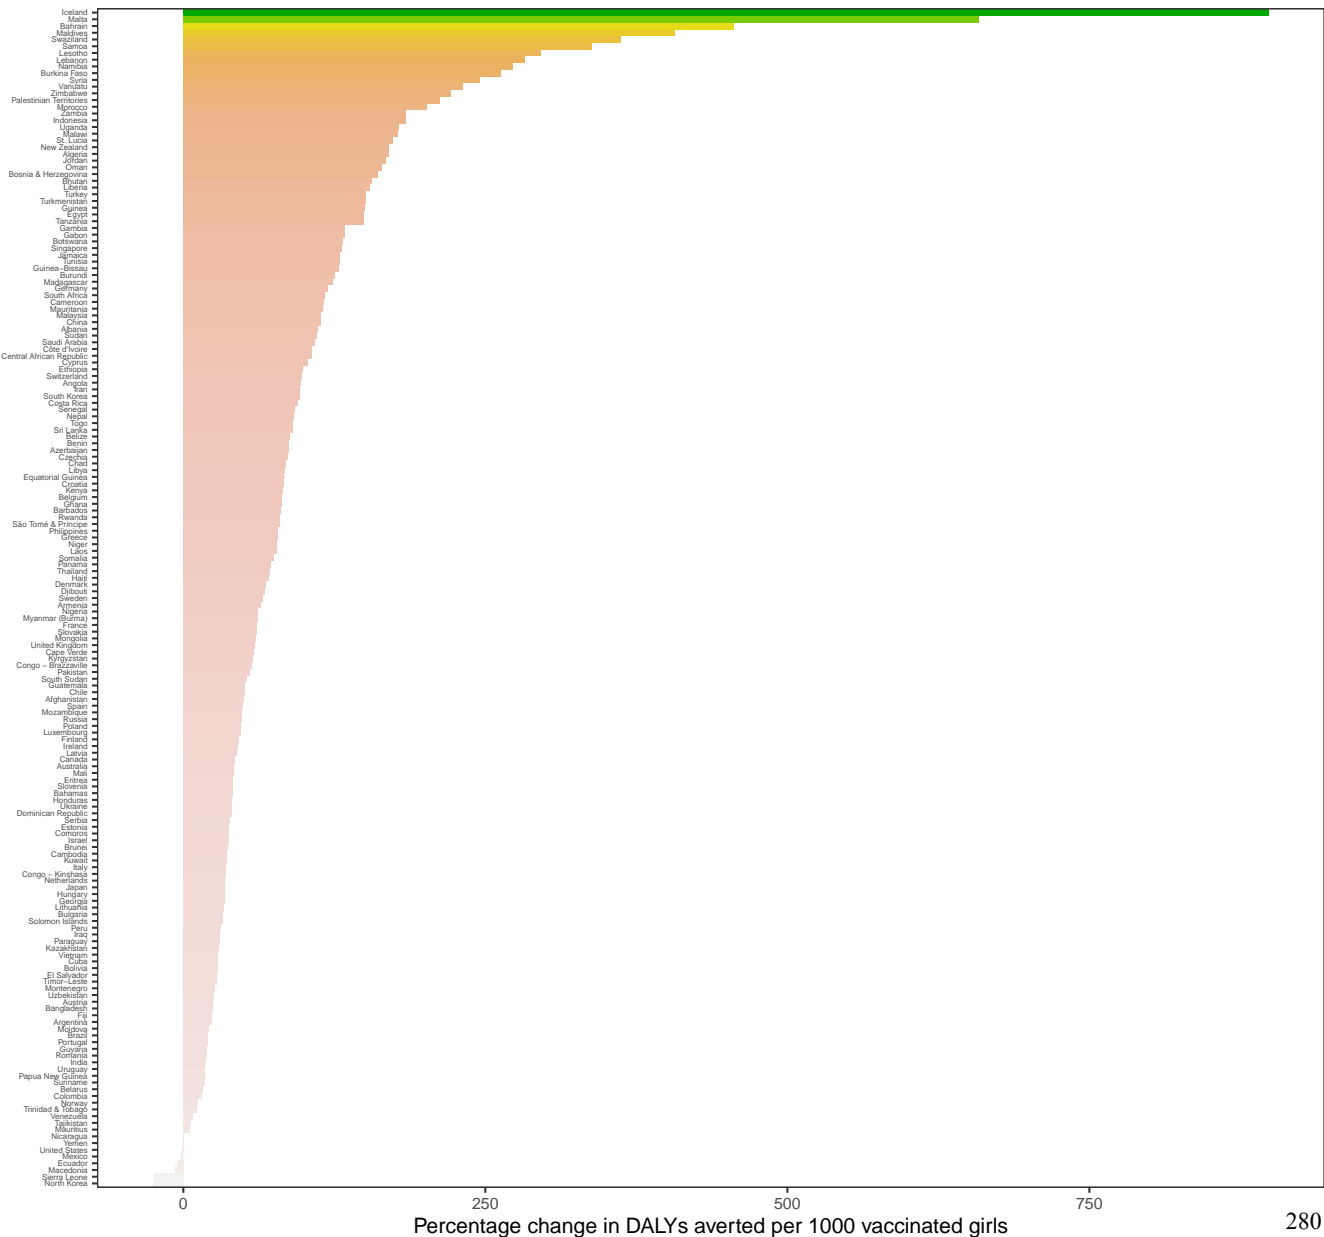

# Percentage change in cases averted per 1000 vaccinated girls (vaccination age = 12 years / bivalent/quadrivalent vaccine)

Comparison of scenario s2 in comparison to scenario s1

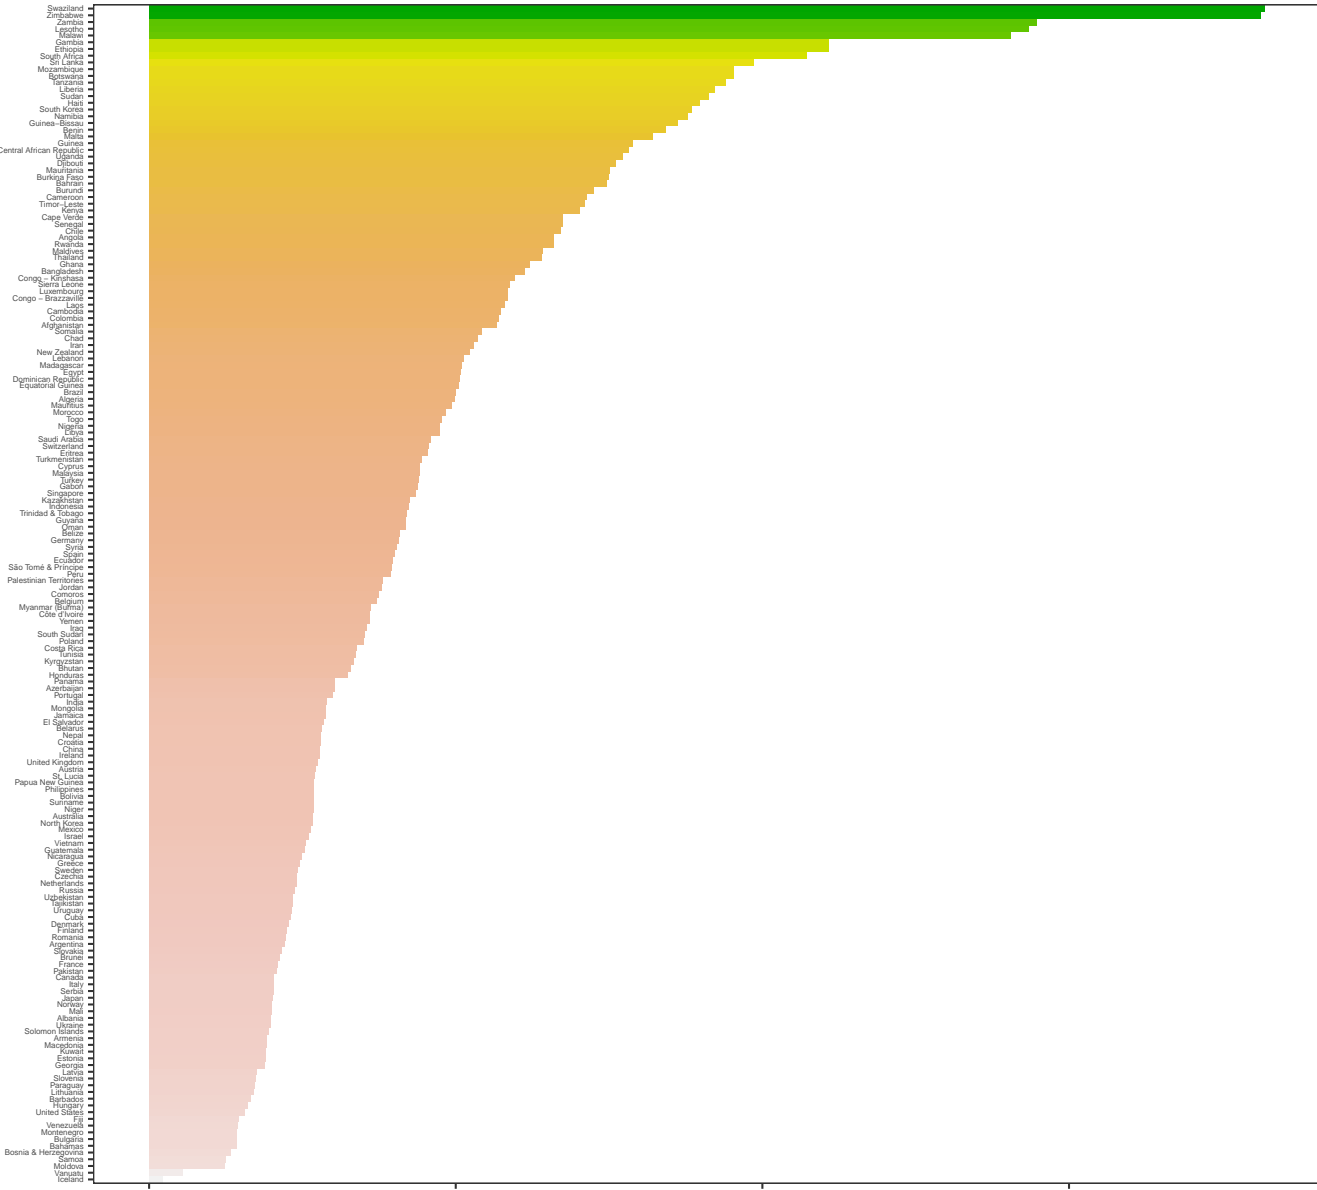

Percentage change in cases averted per 1000 vaccinated girls



# Percentage change in deaths averted per 1000 vaccinated girls (vaccination age = 12 years / bivalent/quadrivalent vaccine)

Comparison of scenario s2 in comparison to scenario s1

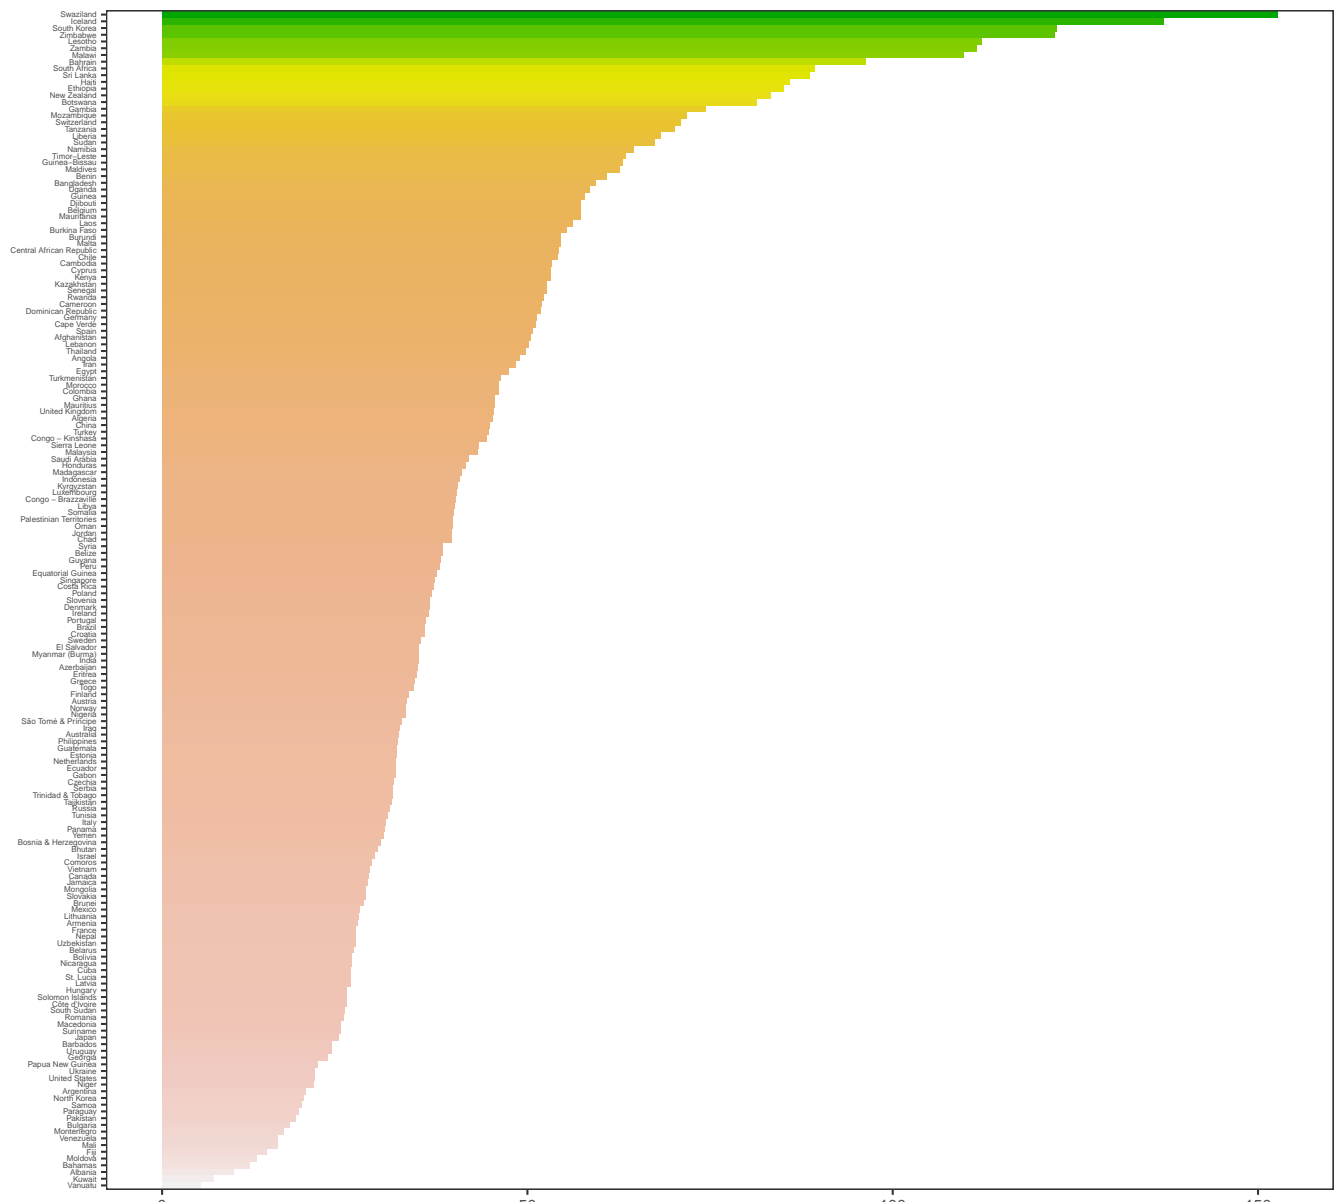

Percentage change in deaths averted per 1000 vaccinated girls



# Percentage change in YLLs averted per 1000 vaccinated girls (vaccination age = 12 years / bivalent/quadrivalent vaccine)

Comparison of scenario s2 in comparison to scenario s1

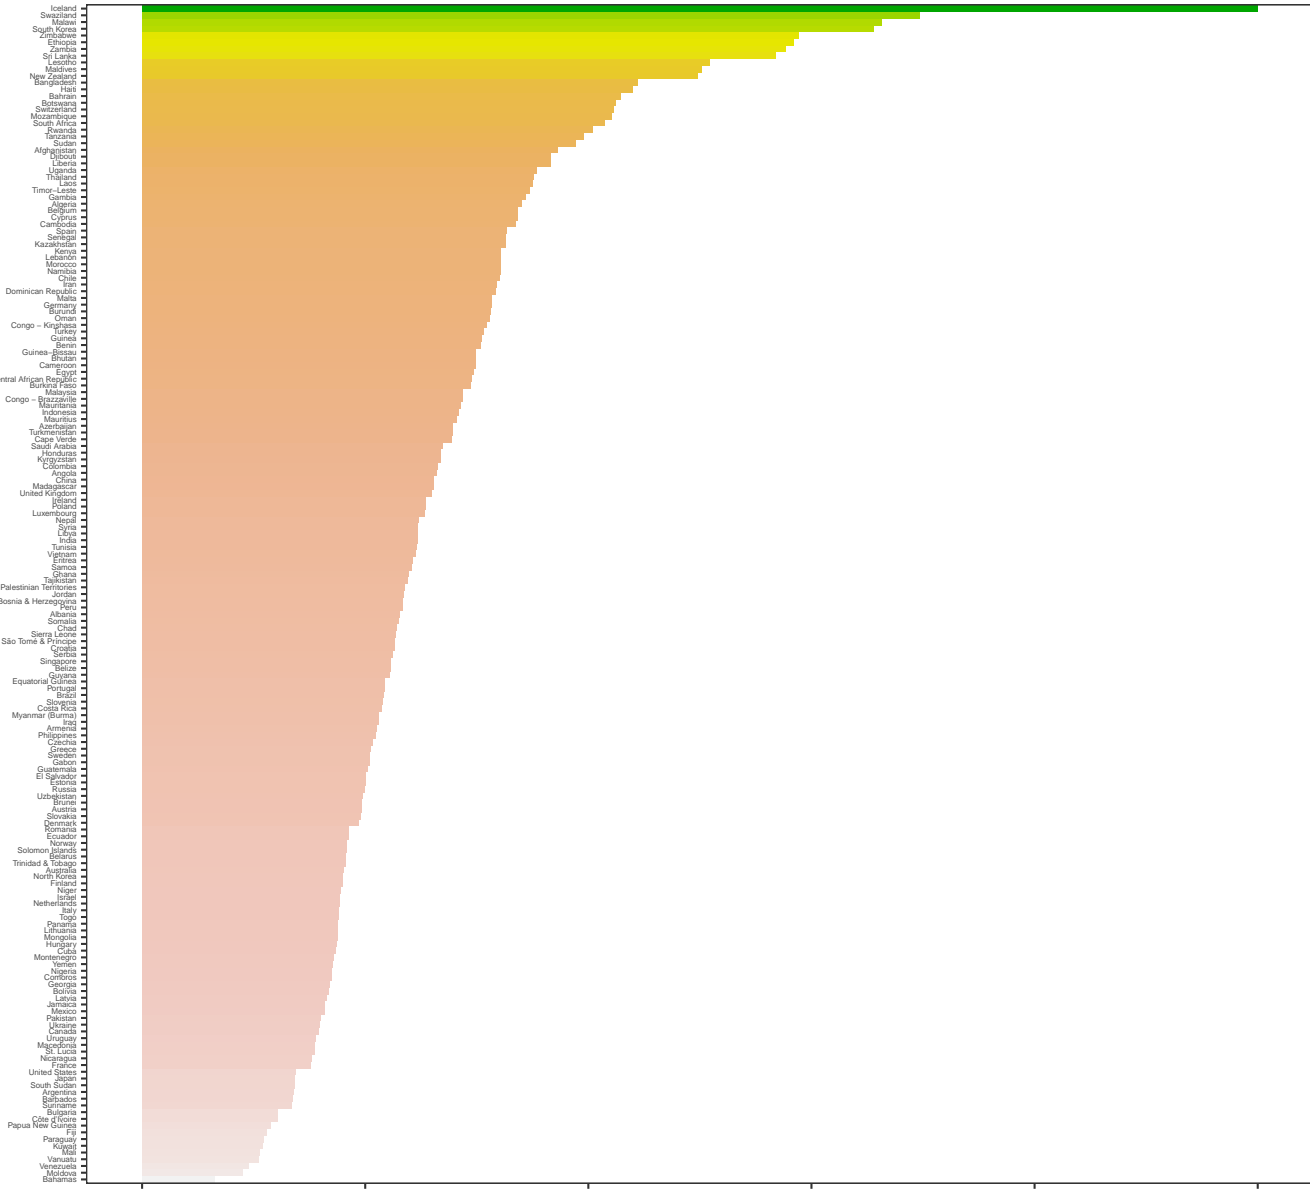

Percentage change in YLLs averted per 1000 vaccinated girls

# Percentage change in DALYs averted per 1000 vaccinated girls (vaccination age = 12 years / bivalent/quadrivalent vaccine)

Comparison of scenario s2 in comparison to scenario s1

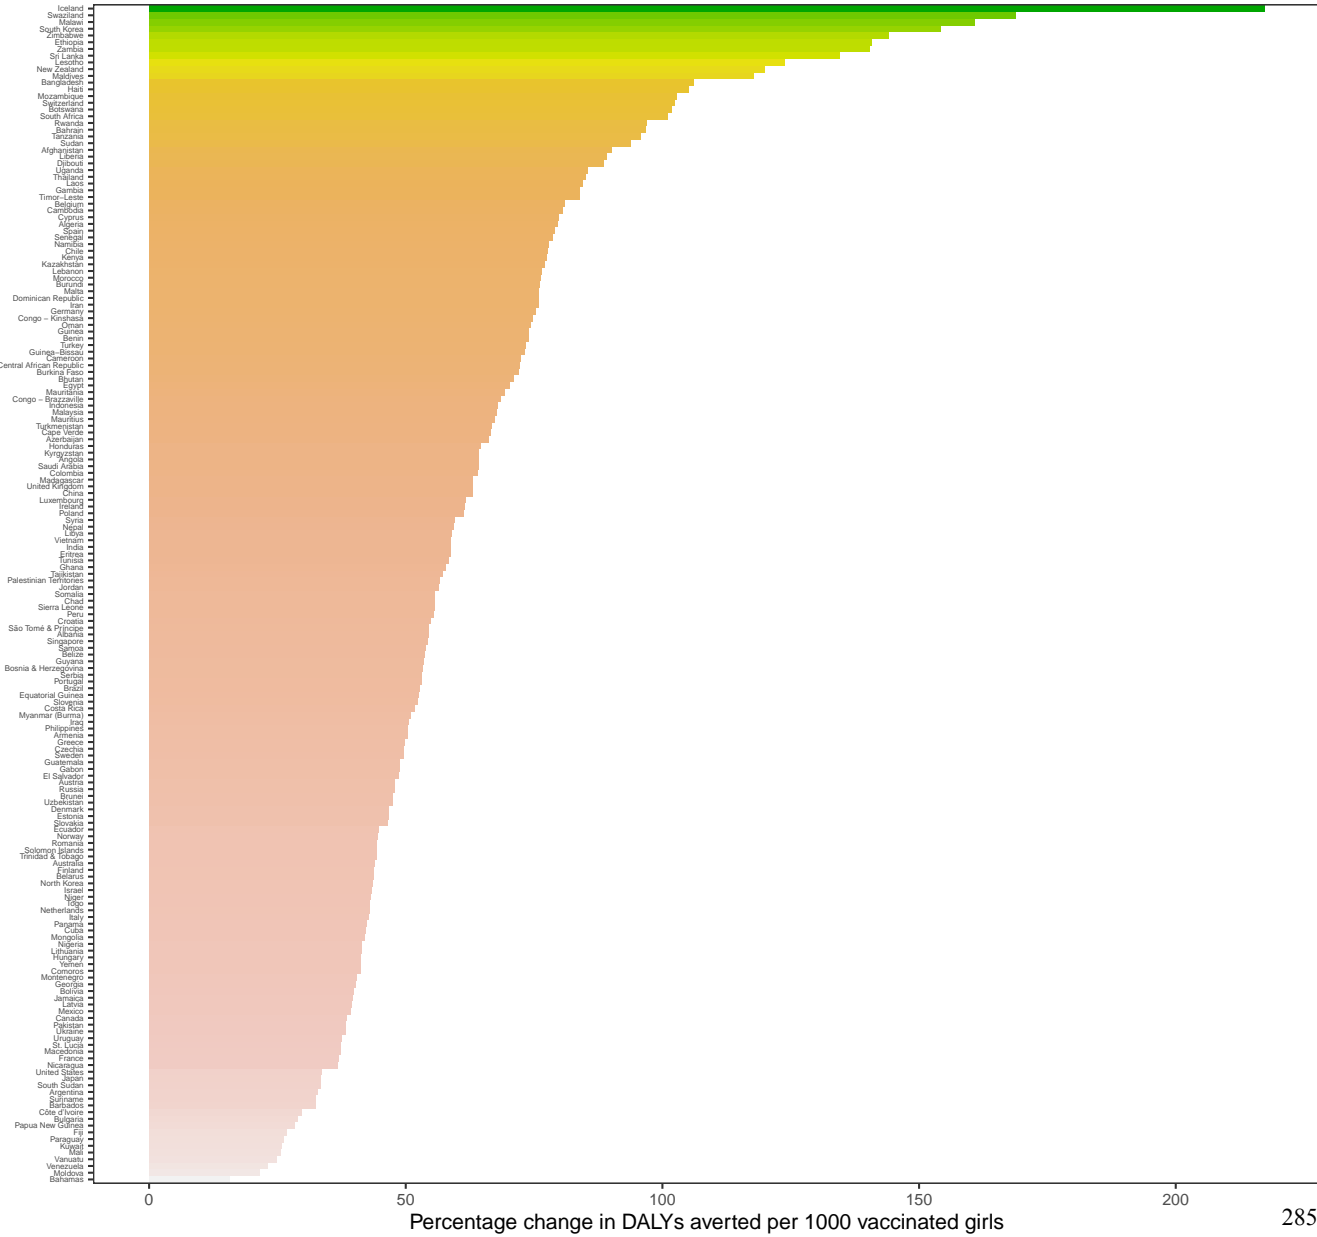





# Percentage change in YLDs averted per 1000 vaccinated girls (vaccination age = 12 years / bivalent/quadrivalent vaccine)

Comparison of scenario s3 in comparison to scenario s1

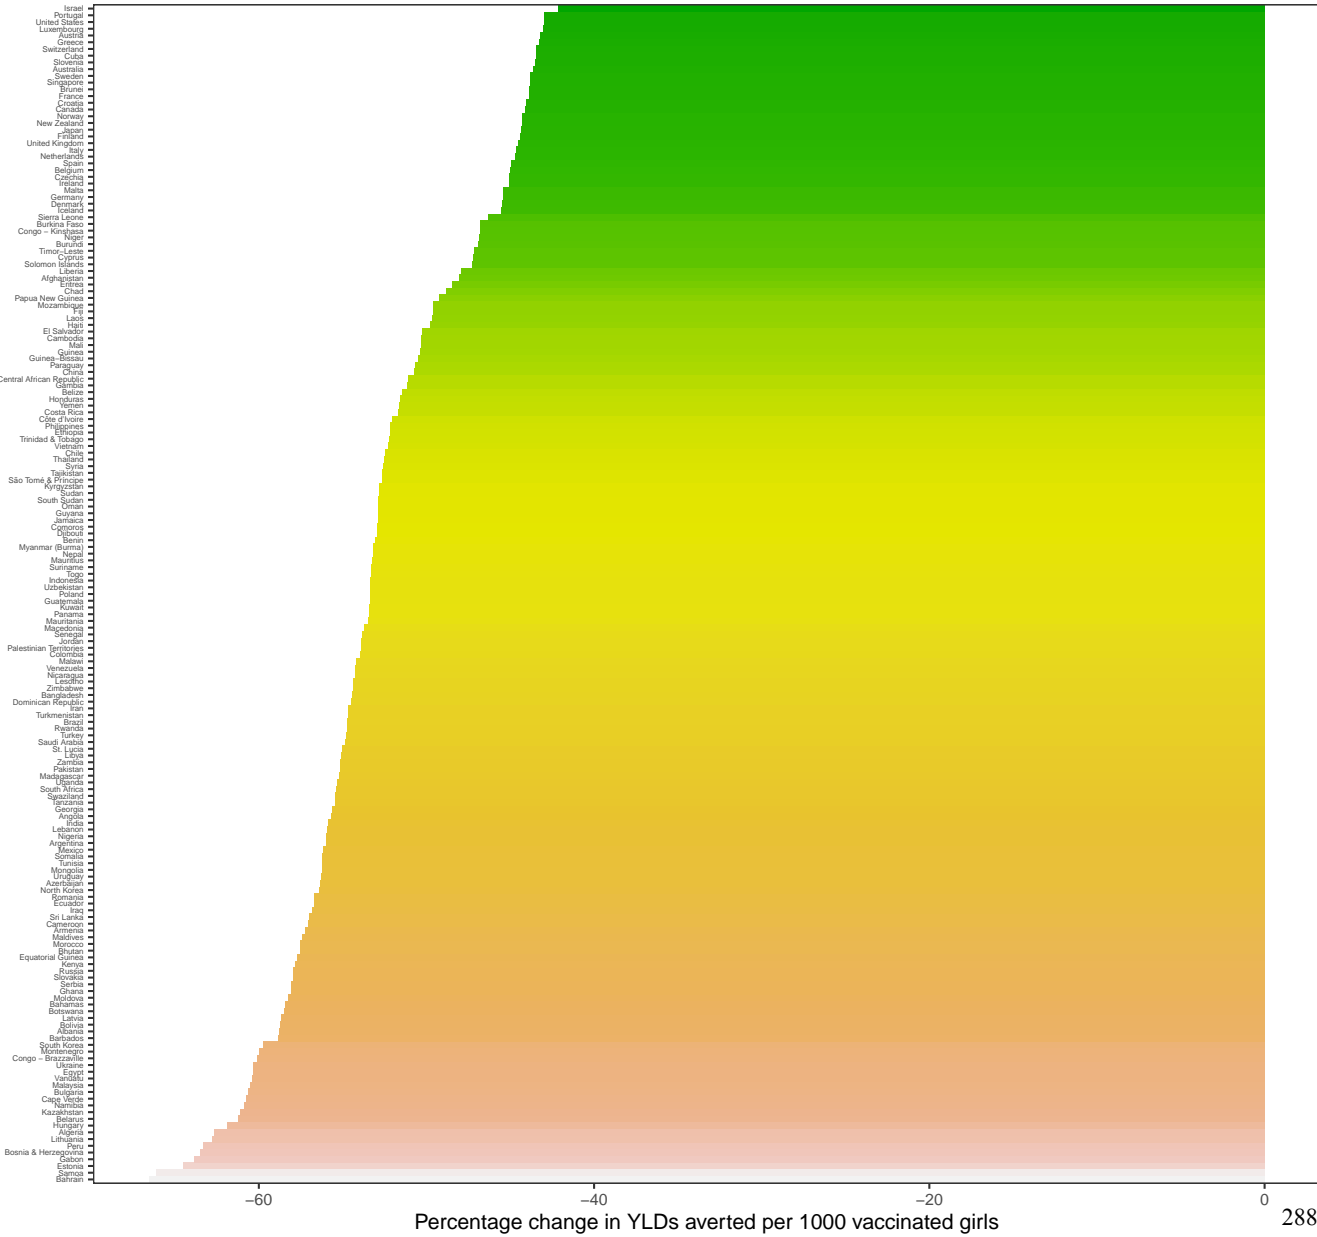







# Percentage change in cases averted per 1000 vaccinated girls (vaccination age = 12 years / bivalent/quadrivalent vaccine)

Comparison of scenario s4 in comparison to scenario s1

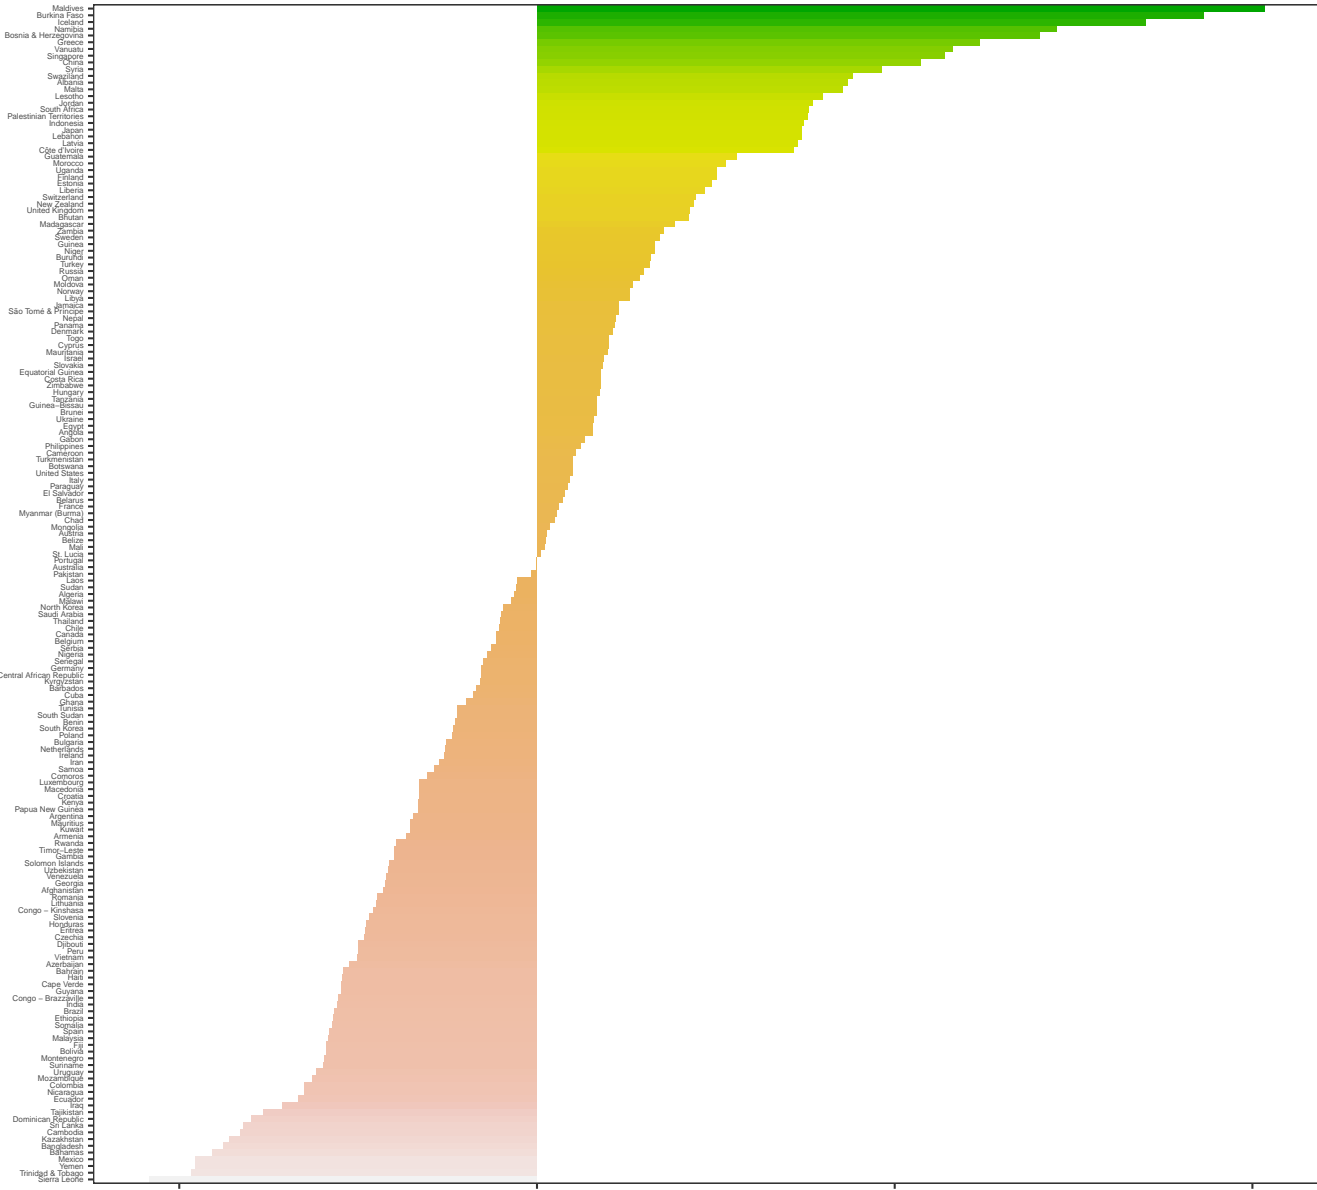

Percentage change in cases averted per 1000 vaccinated girls

# Percentage change in deaths averted per 1000 vaccinated girls (vaccination age = 12 years / bivalent/quadrivalent vaccine)

Comparison of scenario s4 in comparison to scenario s1

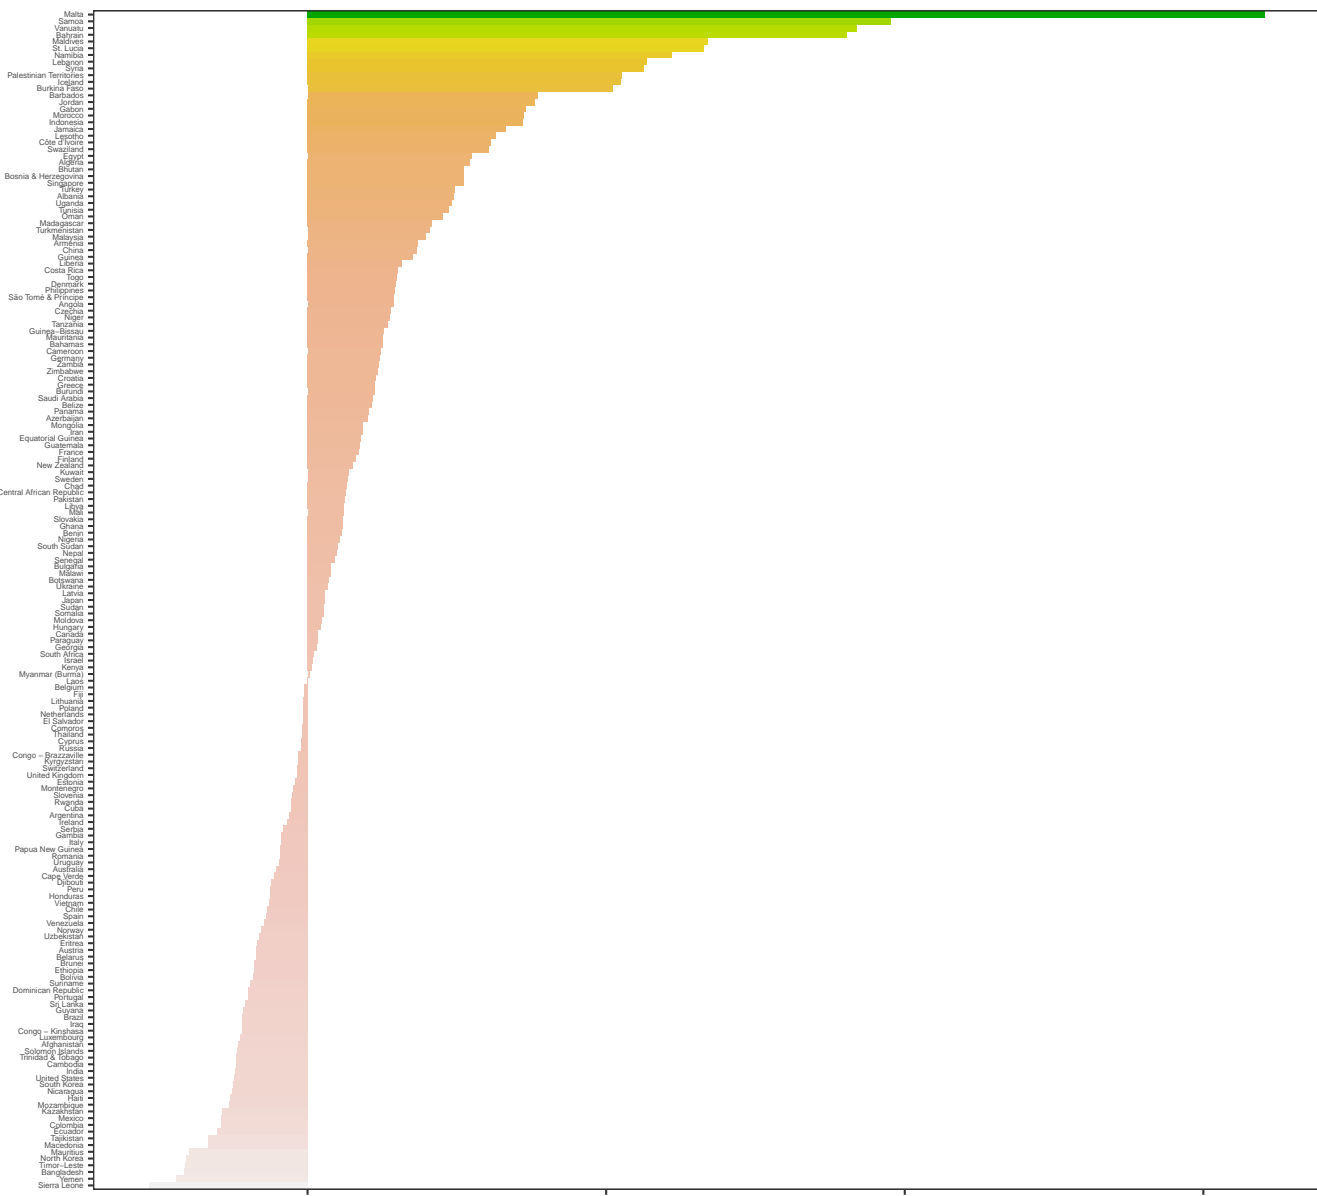

Percentage change in deaths averted per 1000 vaccinated girls

# Percentage change in YLDs averted per 1000 vaccinated girls (vaccination age = 12 years / bivalent/quadrivalent vaccine)

Comparison of scenario s4 in comparison to scenario s1

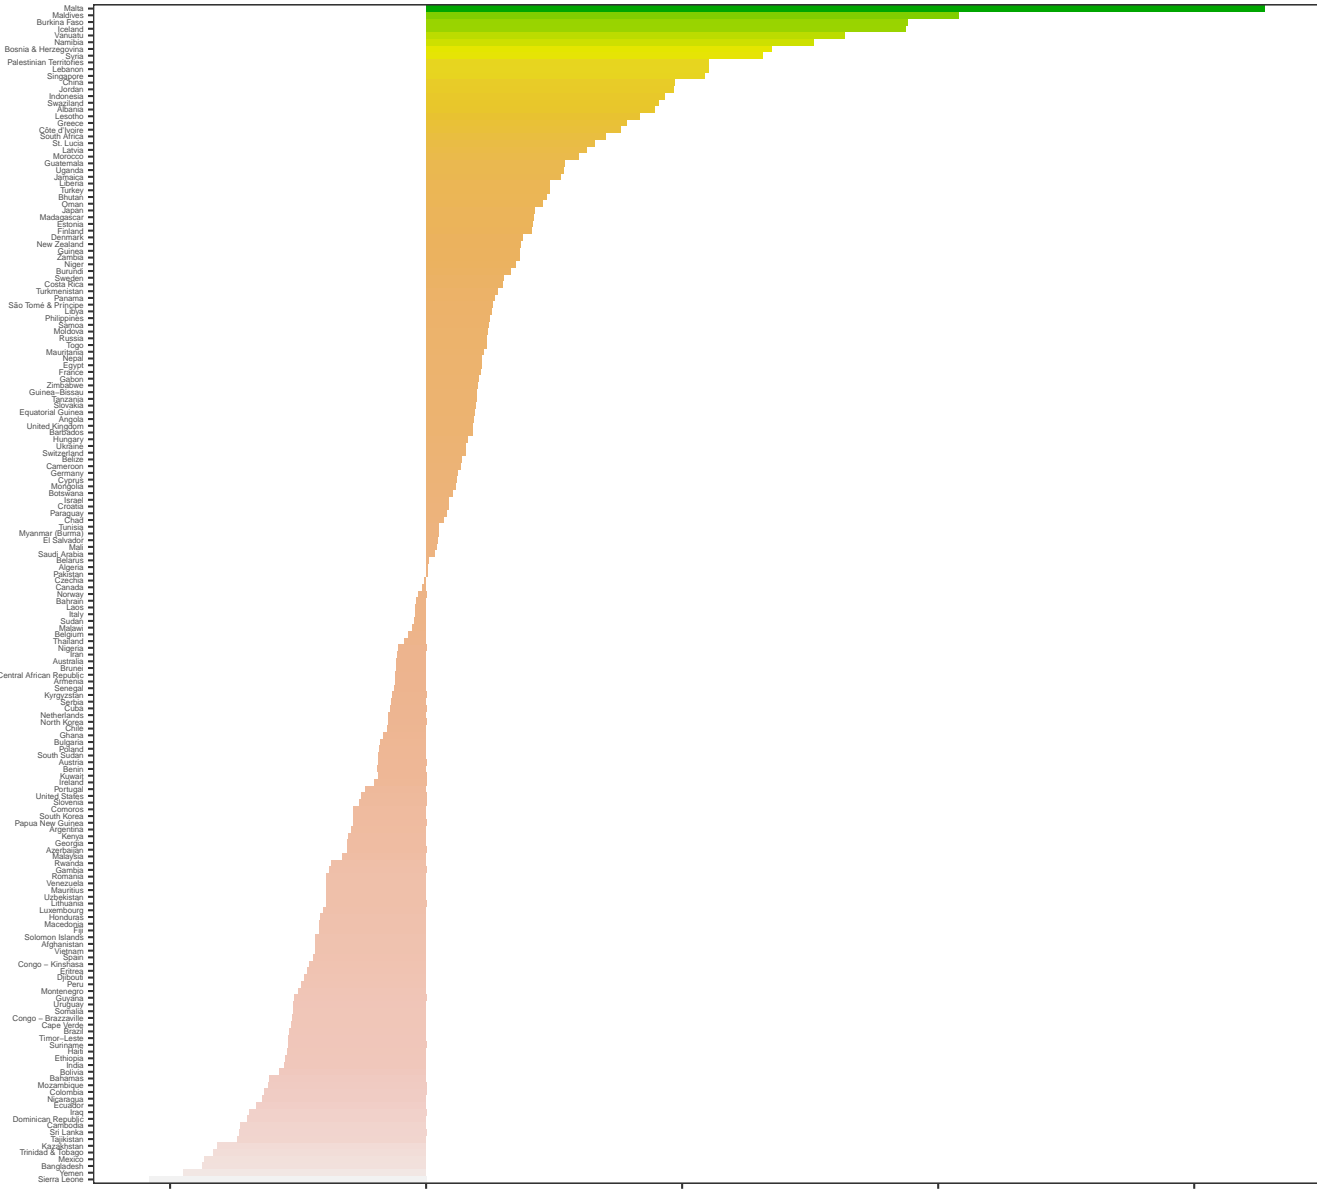

Percentage change in YLDs averted per 1000 vaccinated girls

# Percentage change in YLLs averted per 1000 vaccinated girls (vaccination age = 12 years / bivalent/quadrivalent vaccine)

Comparison of scenario s4 in comparison to scenario s1

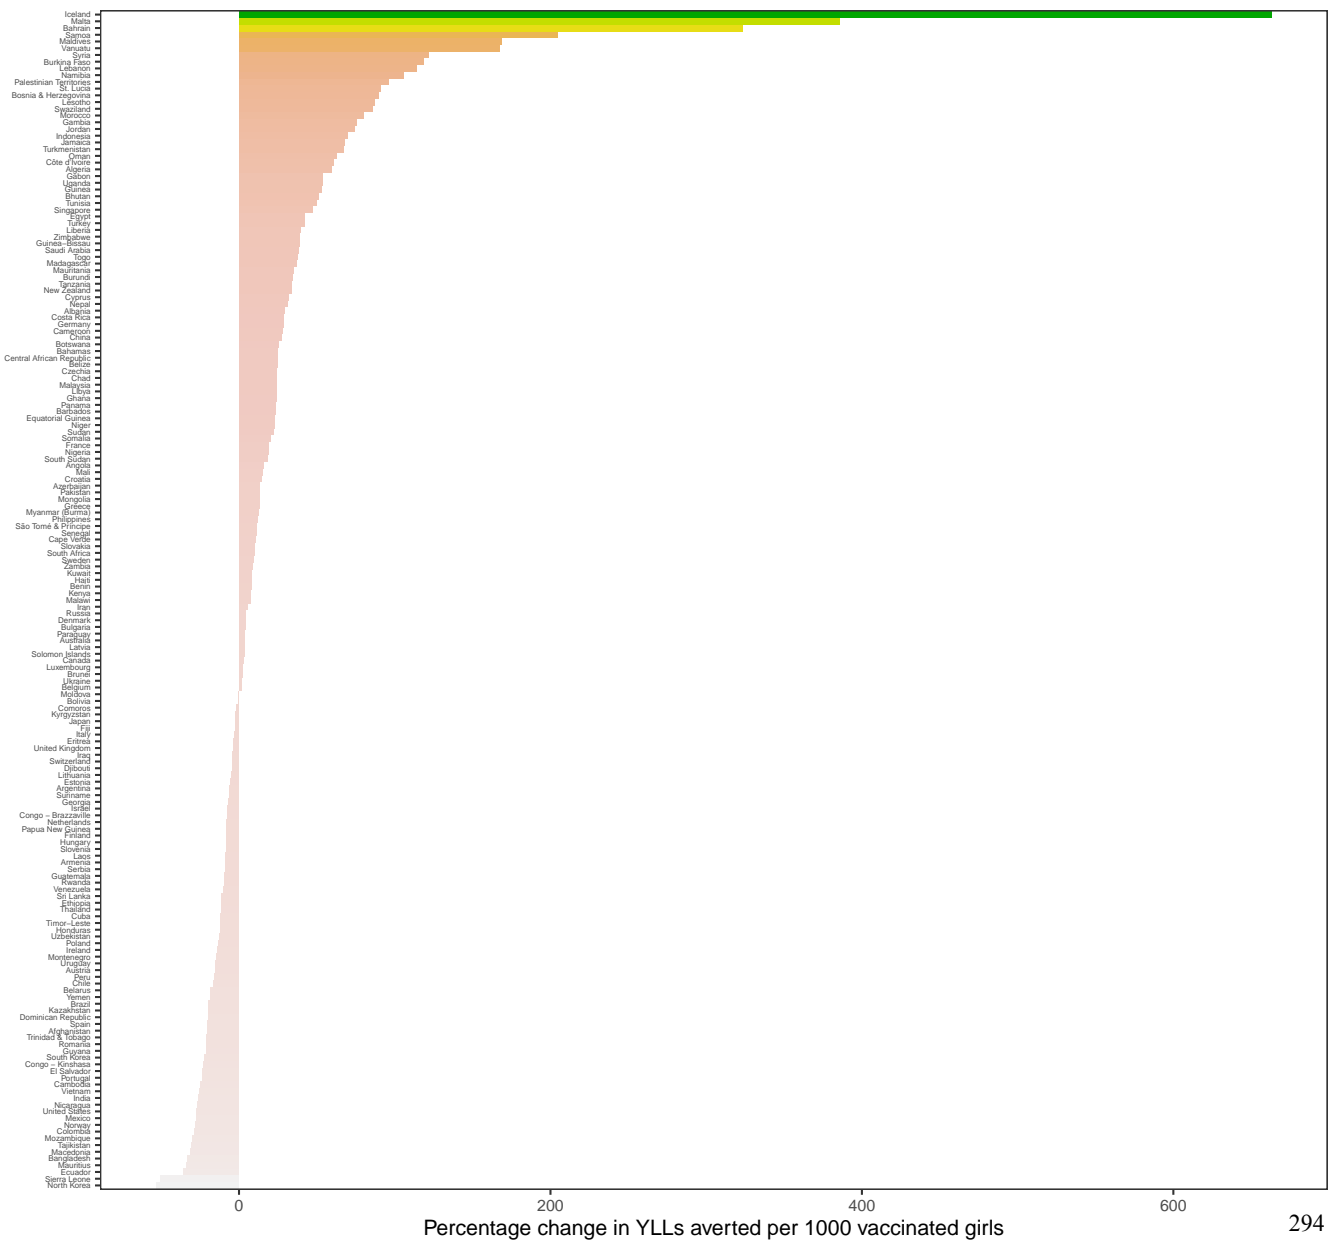

# Percentage change in DALYs averted per 1000 vaccinated girls (vaccination age = 12 years / bivalent/quadrivalent vaccine)

Comparison of scenario s4 in comparison to scenario s1

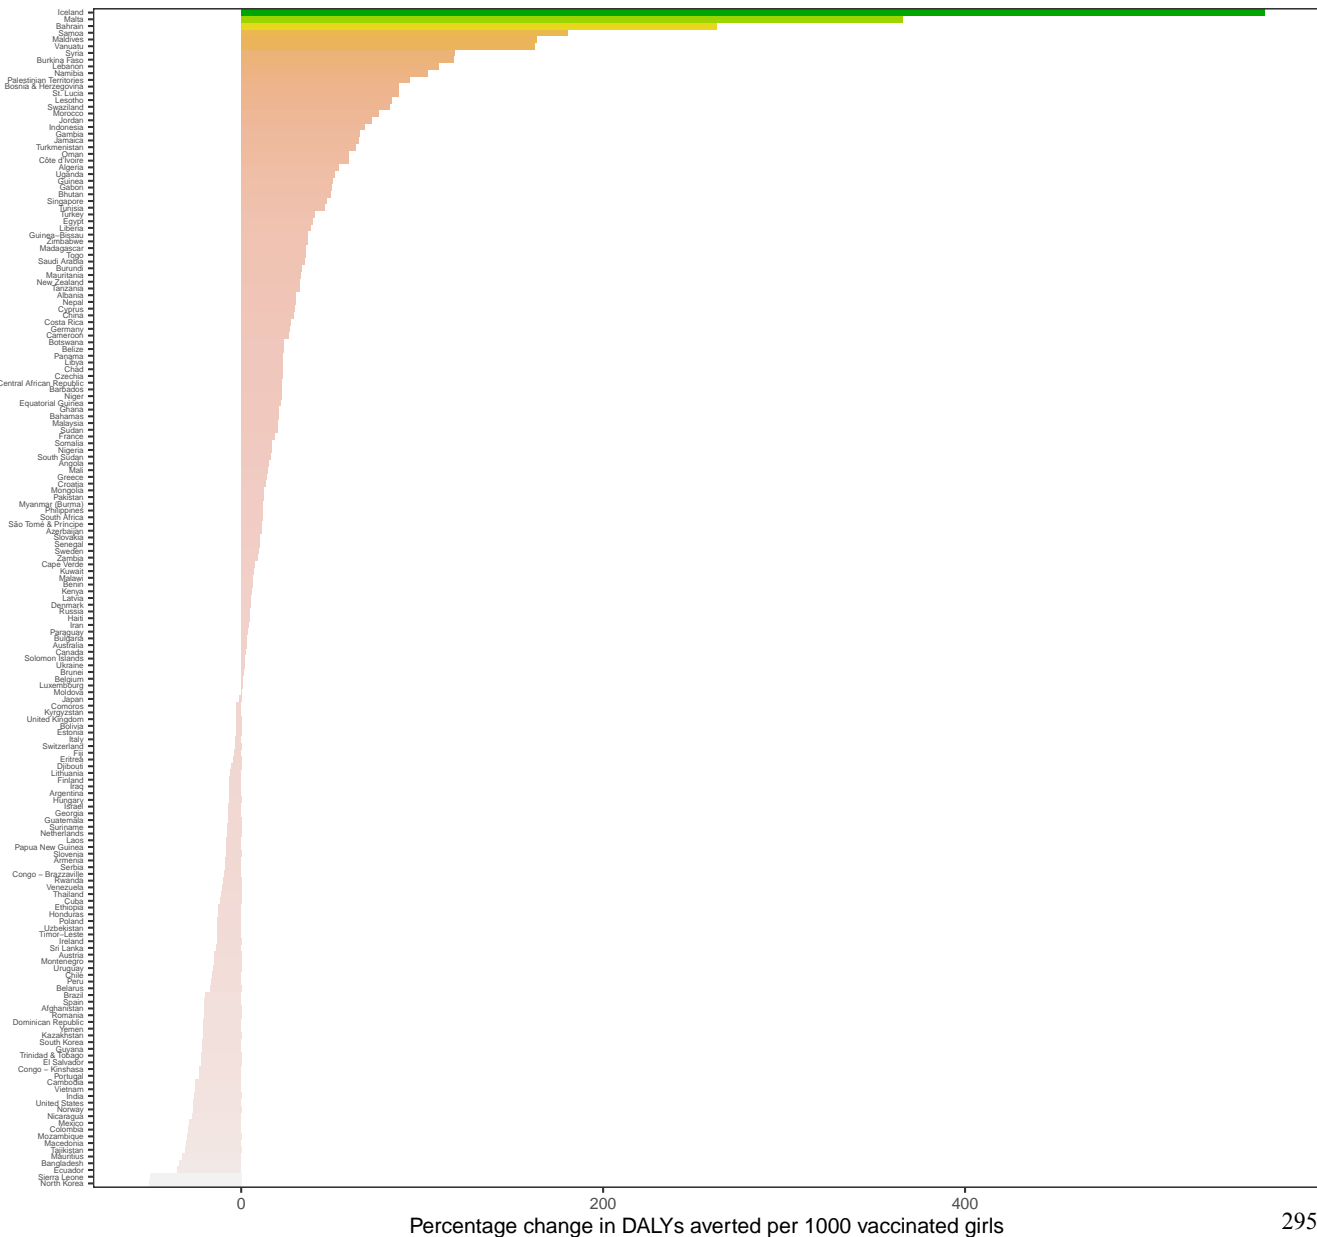

# Percentage change in cases averted per 1000 vaccinated girls (vaccination age = 12 years / bivalent/quadrivalent vaccine)

Comparison of scenario s5 in comparison to scenario s1

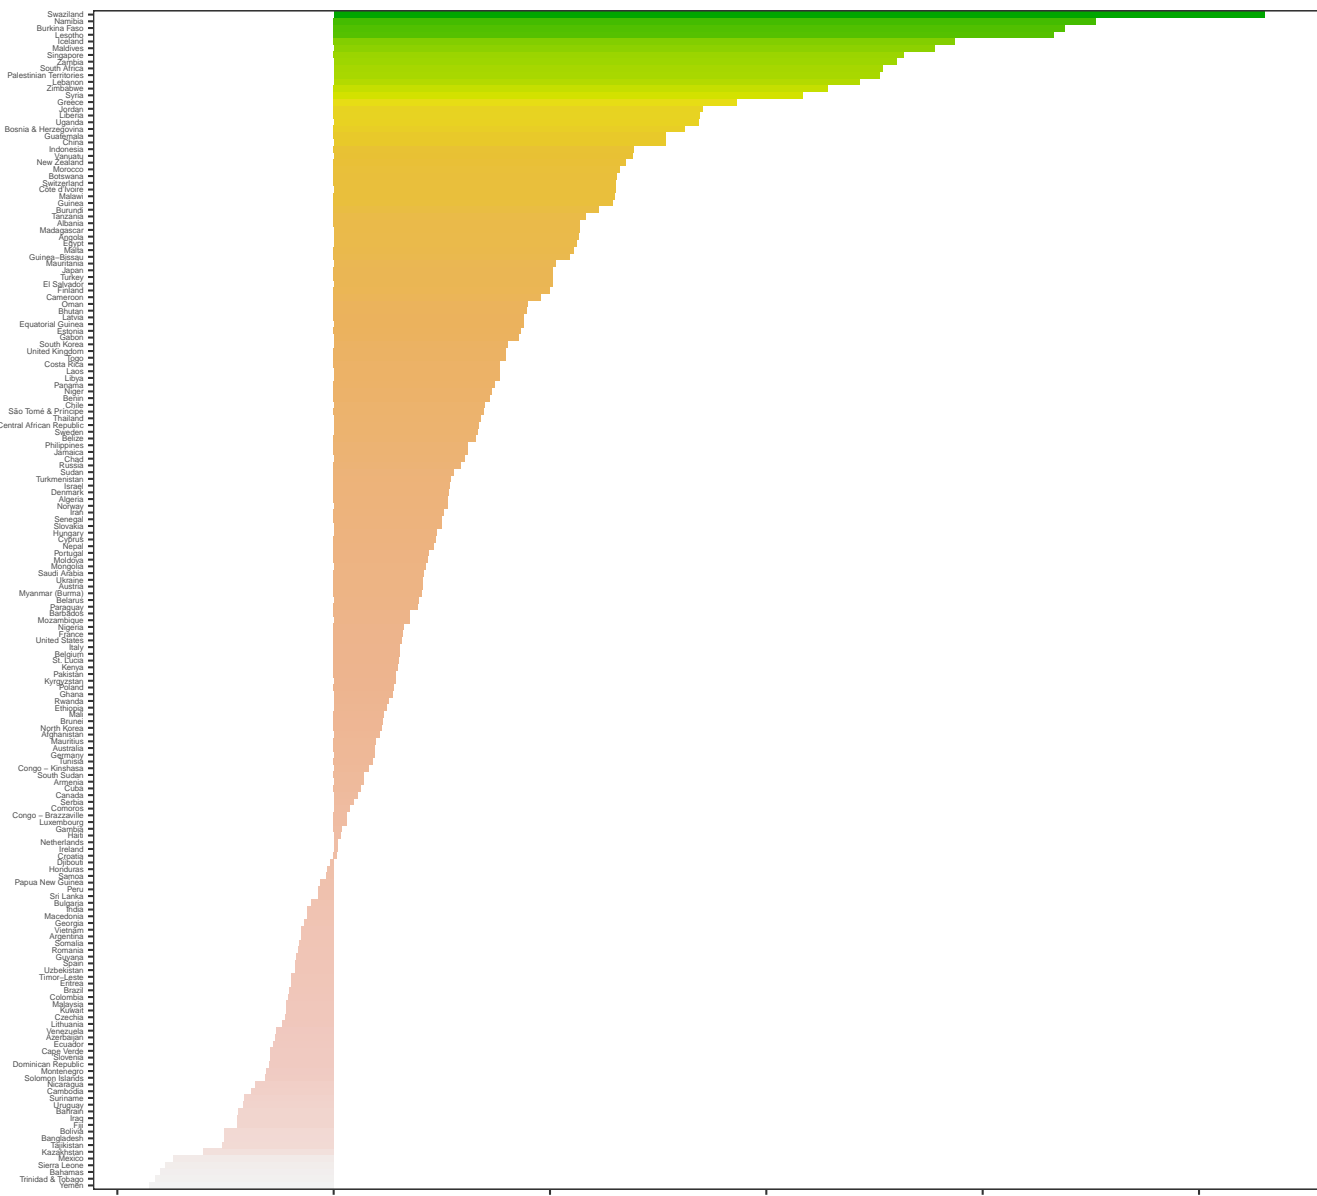

Percentage change in cases averted per 1000 vaccinated girls

# Percentage change in deaths averted per 1000 vaccinated girls (vaccination age = 12 years / bivalent/quadrivalent vaccine)

Comparison of scenario s5 in comparison to scenario s1

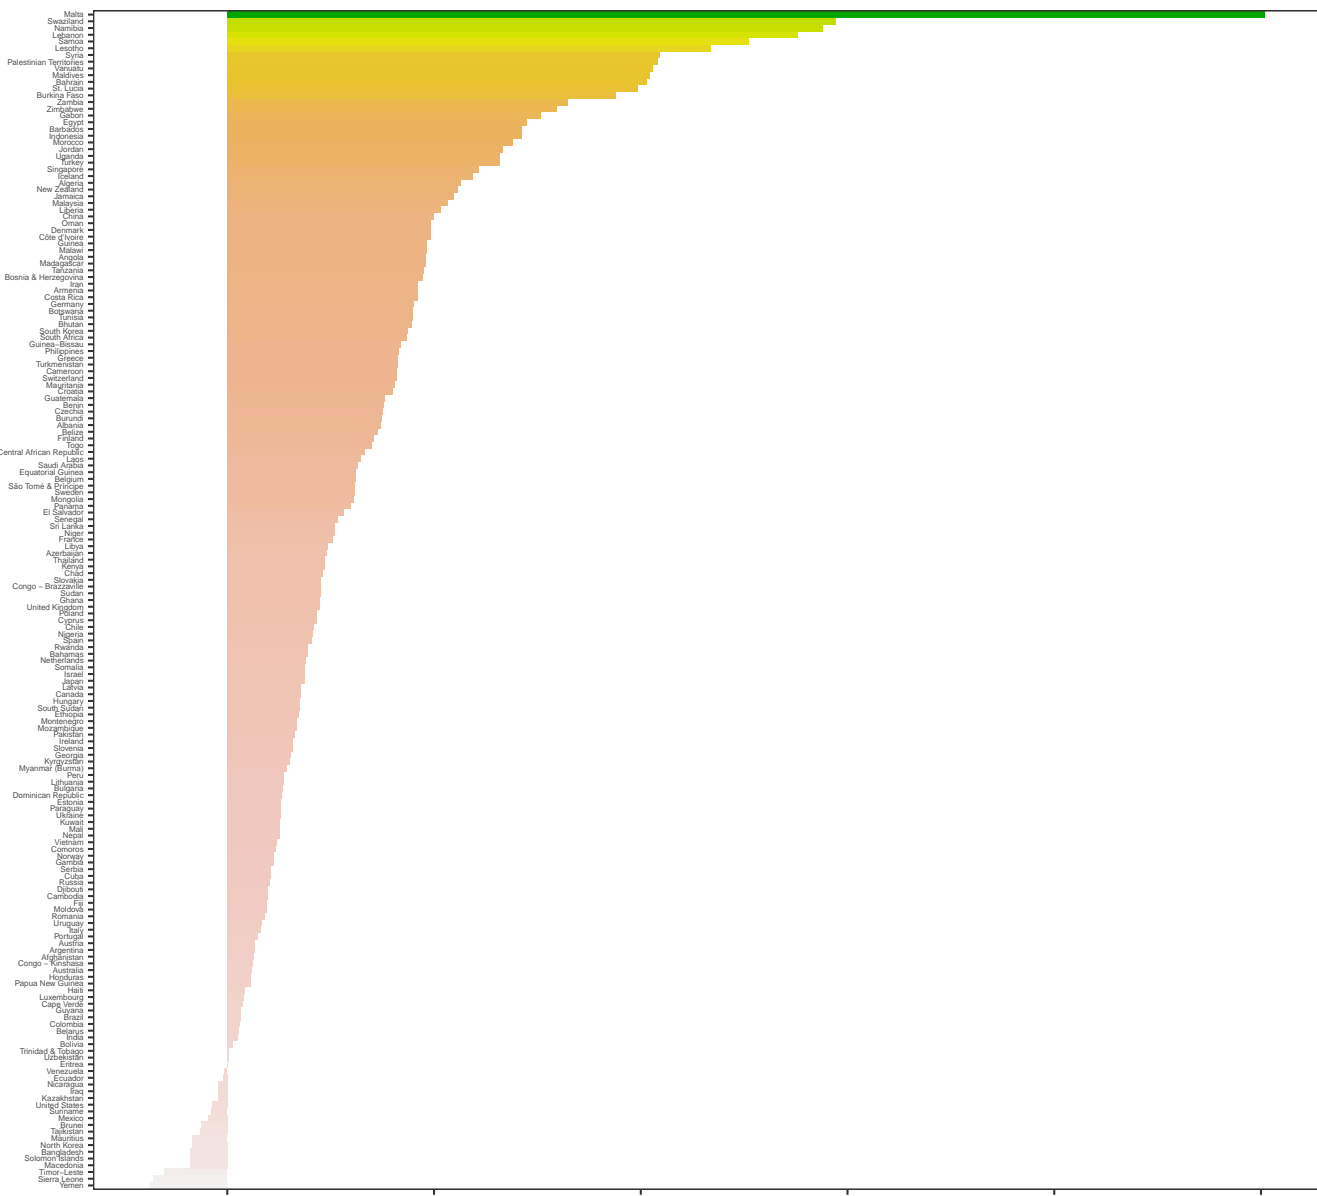

Percentage change in deaths averted per 1000 vaccinated girls



# Percentage change in YLDs averted per 1000 vaccinated girls (vaccination age = 12 years / bivalent/quadrivalent vaccine)

Comparison of scenario s5 in comparison to scenario s1

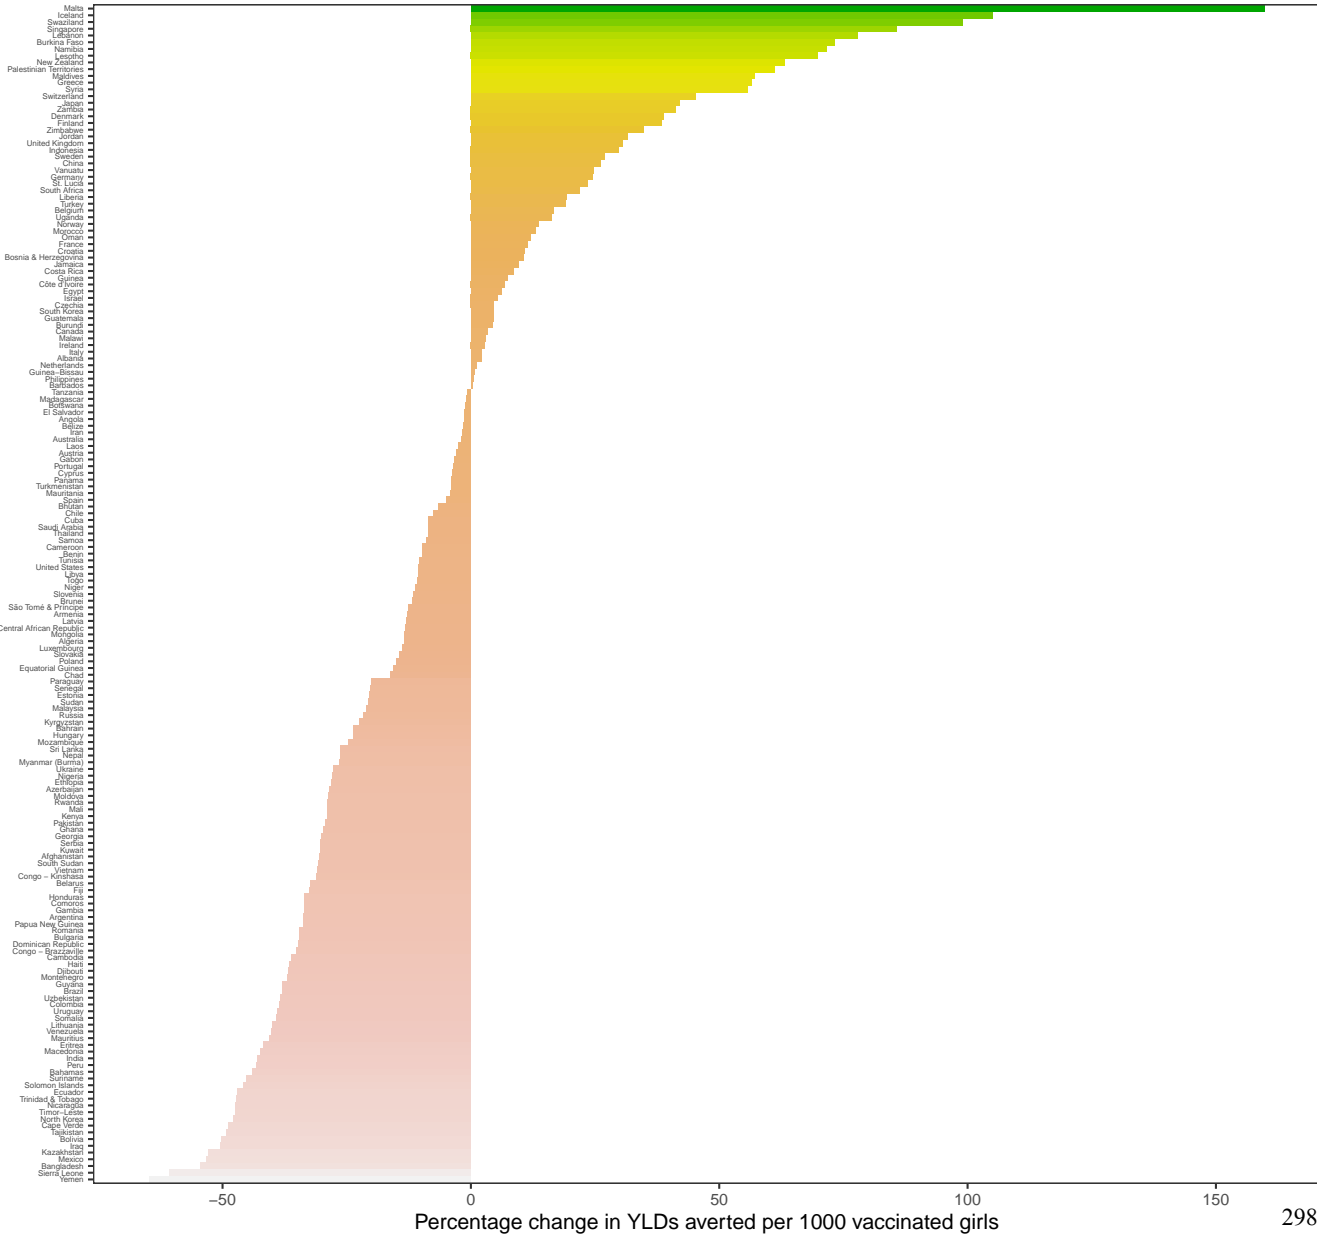

Percentage change in YLDs averted per 1000 vaccinated girls

# Percentage change in YLLs averted per 1000 vaccinated girls (vaccination age = 12 years / bivalent/quadrivalent vaccine)

Comparison of scenario s5 in comparison to scenario s1

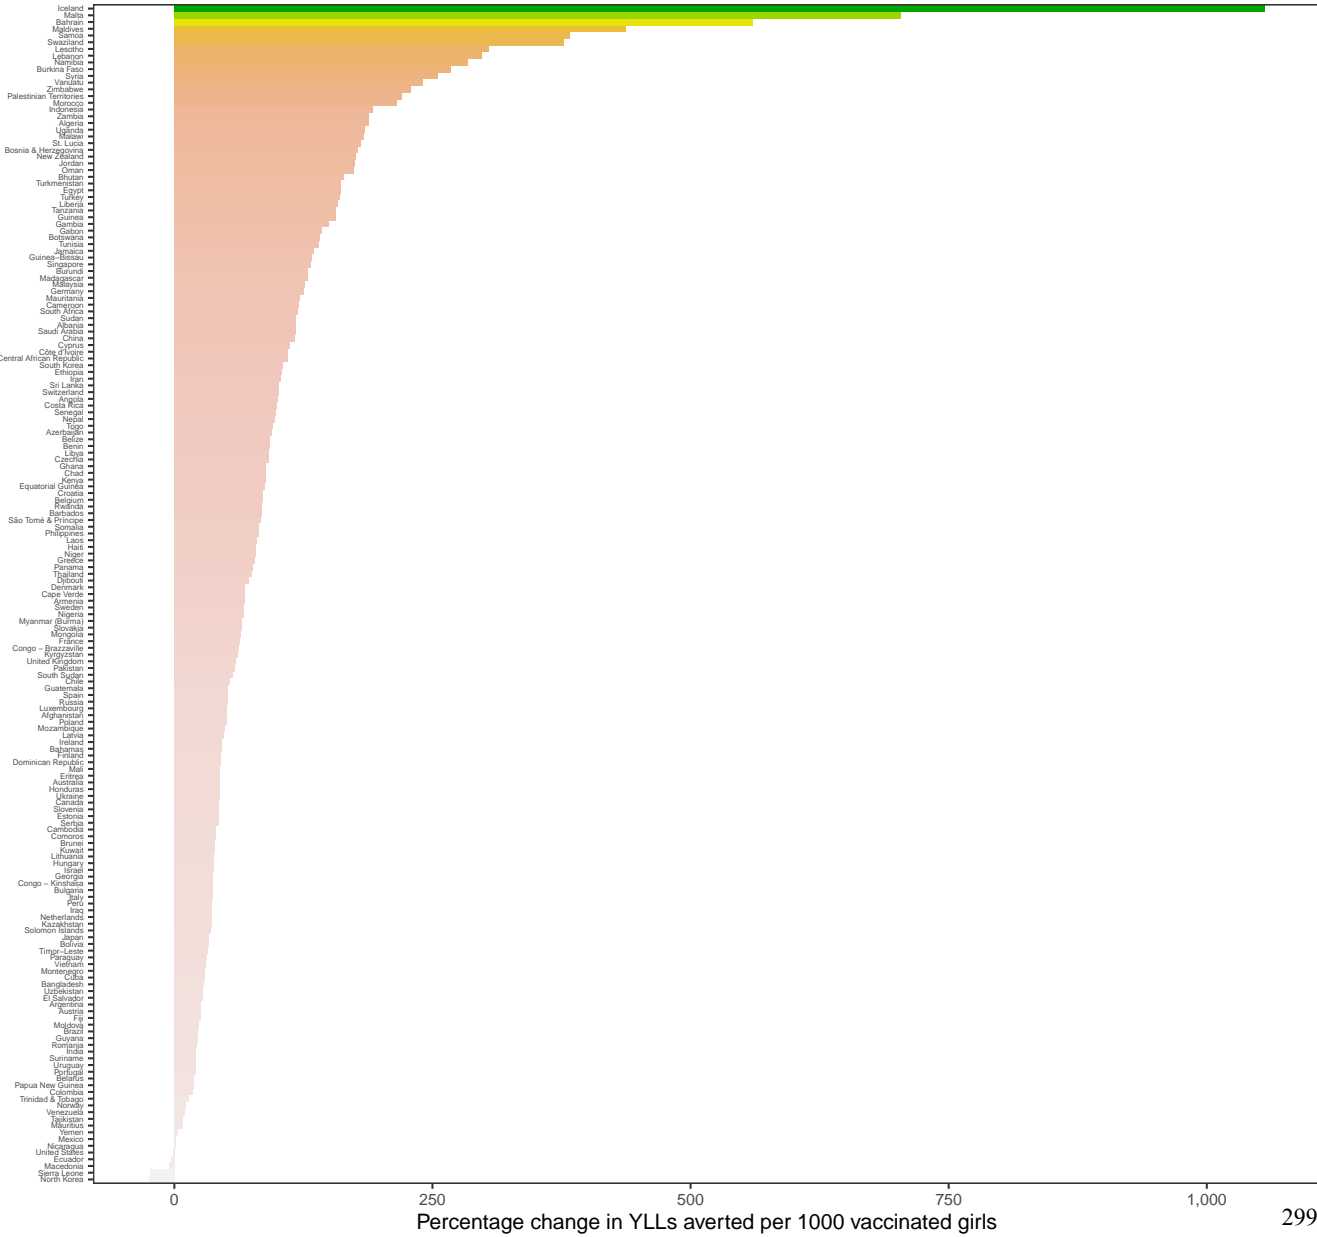

# Percentage change in DALYs averted per 1000 vaccinated girls (vaccination age = 12 years / bivalent/quadrivalent vaccine)

Comparison of scenario s5 in comparison to scenario s1

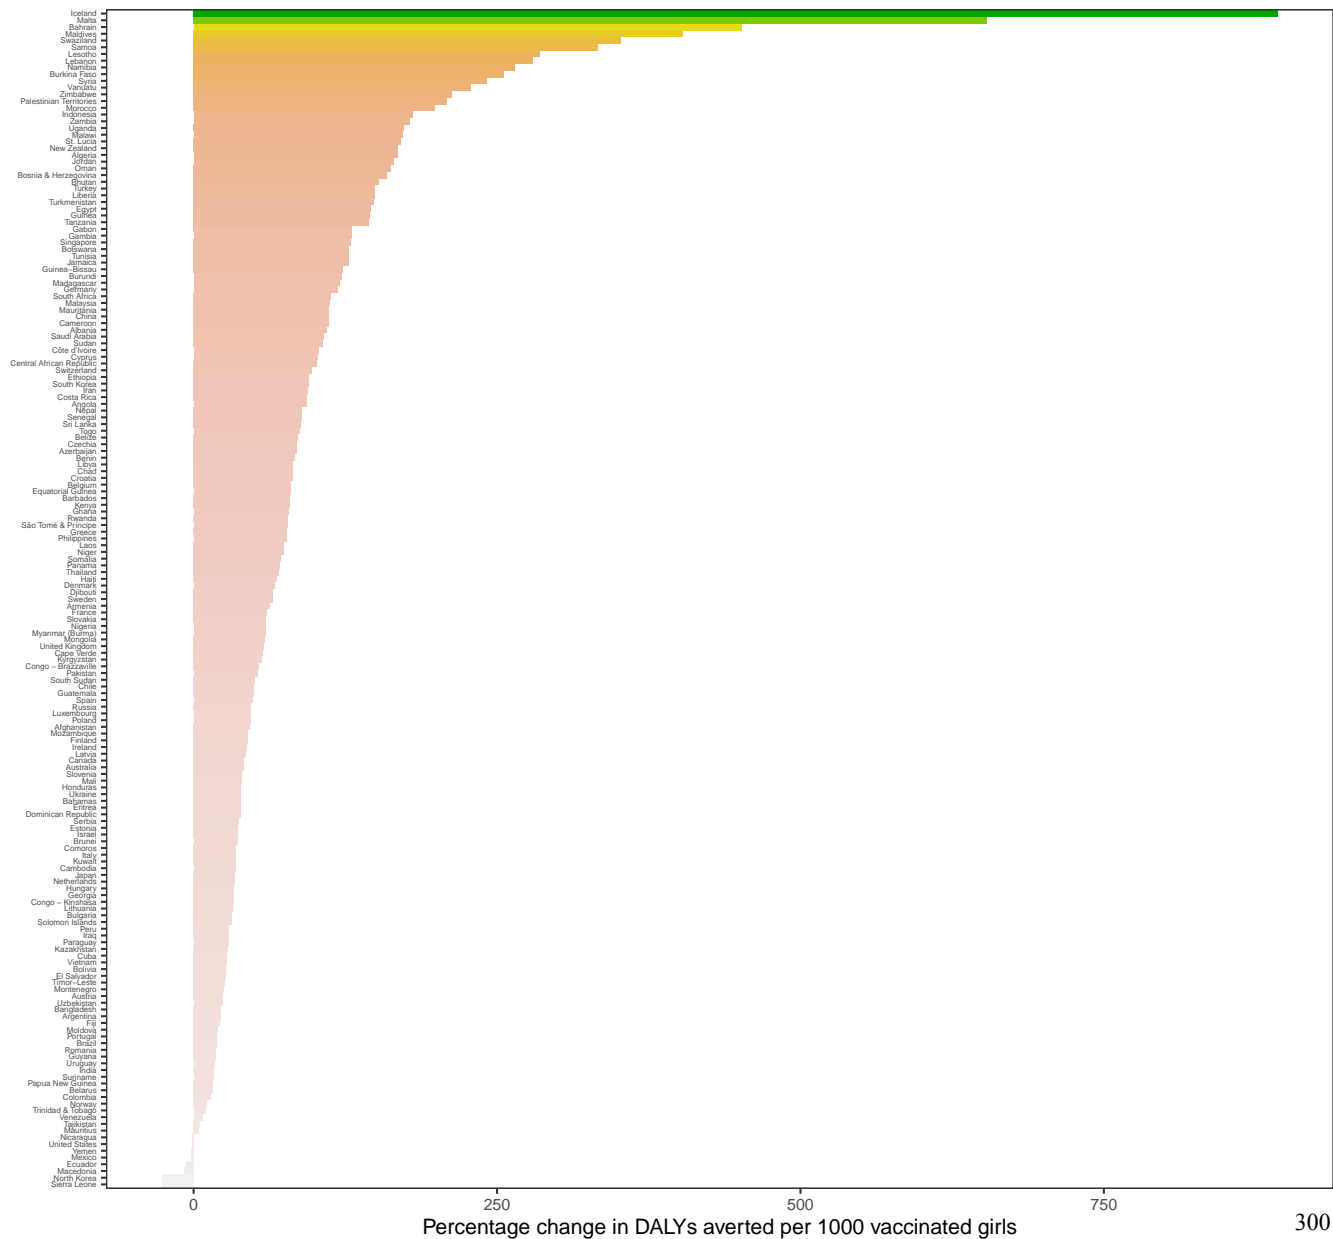

# Percentage change in cases averted per 1000 vaccinated girls (vaccination age = 12 years / nonavalent vaccine)

Comparison of scenario s2 in comparison to scenario s1

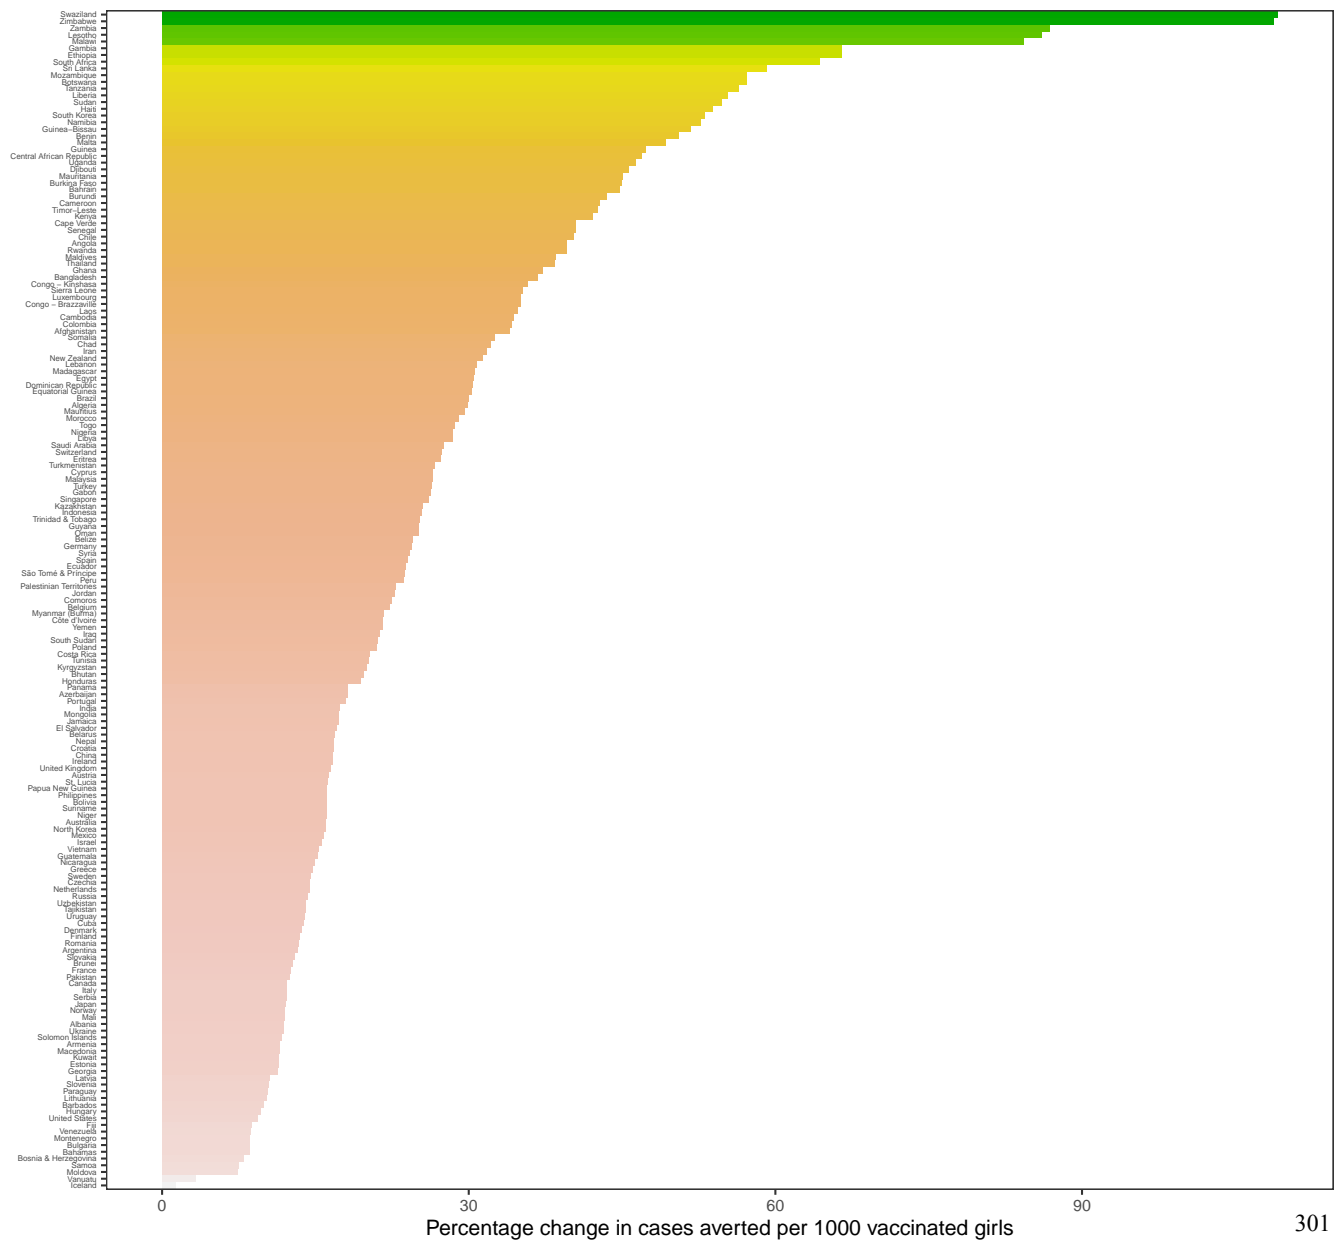

# Percentage change in deaths averted per 1000 vaccinated girls (vaccination age = 12 years / nonavalent vaccine)

Comparison of scenario s2 in comparison to scenario s1

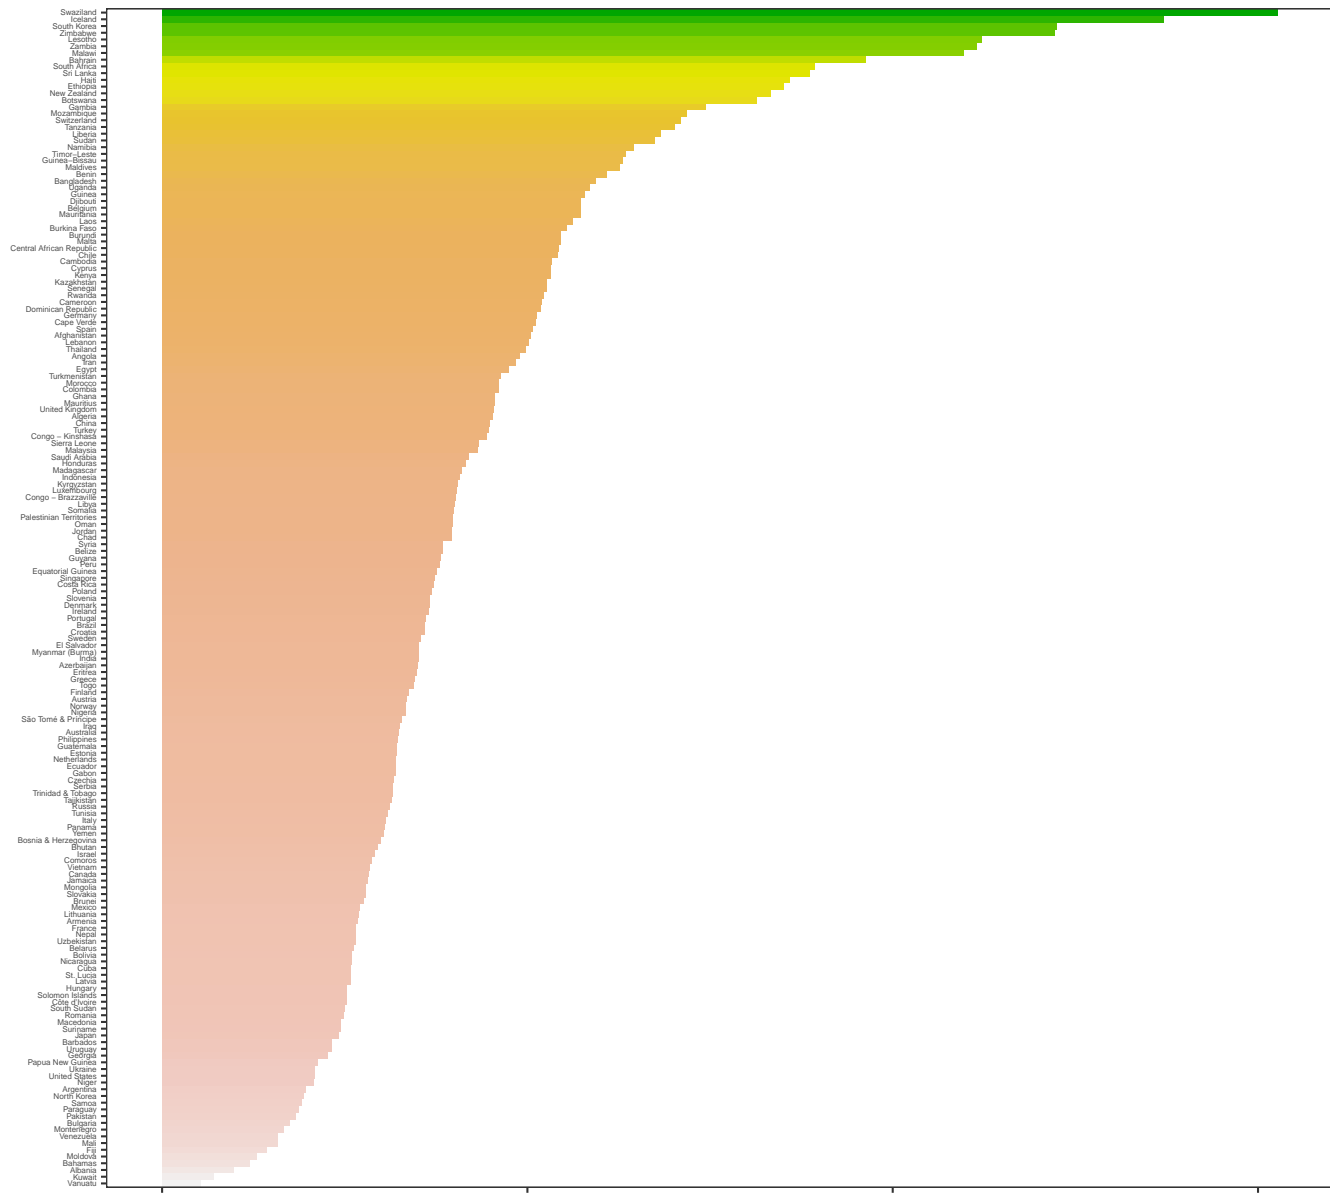

Percentage change in deaths averted per 1000 vaccinated girls



# Percentage change in YLLs averted per 1000 vaccinated girls (vaccination age = 12 years / nonavalent vaccine)

Comparison of scenario s2 in comparison to scenario s1



Percentage change in YLLs averted per 1000 vaccinated girls

# Percentage change in DALYs averted per 1000 vaccinated girls (vaccination age = 12 years / nonavalent vaccine)

Comparison of scenario s2 in comparison to scenario s1

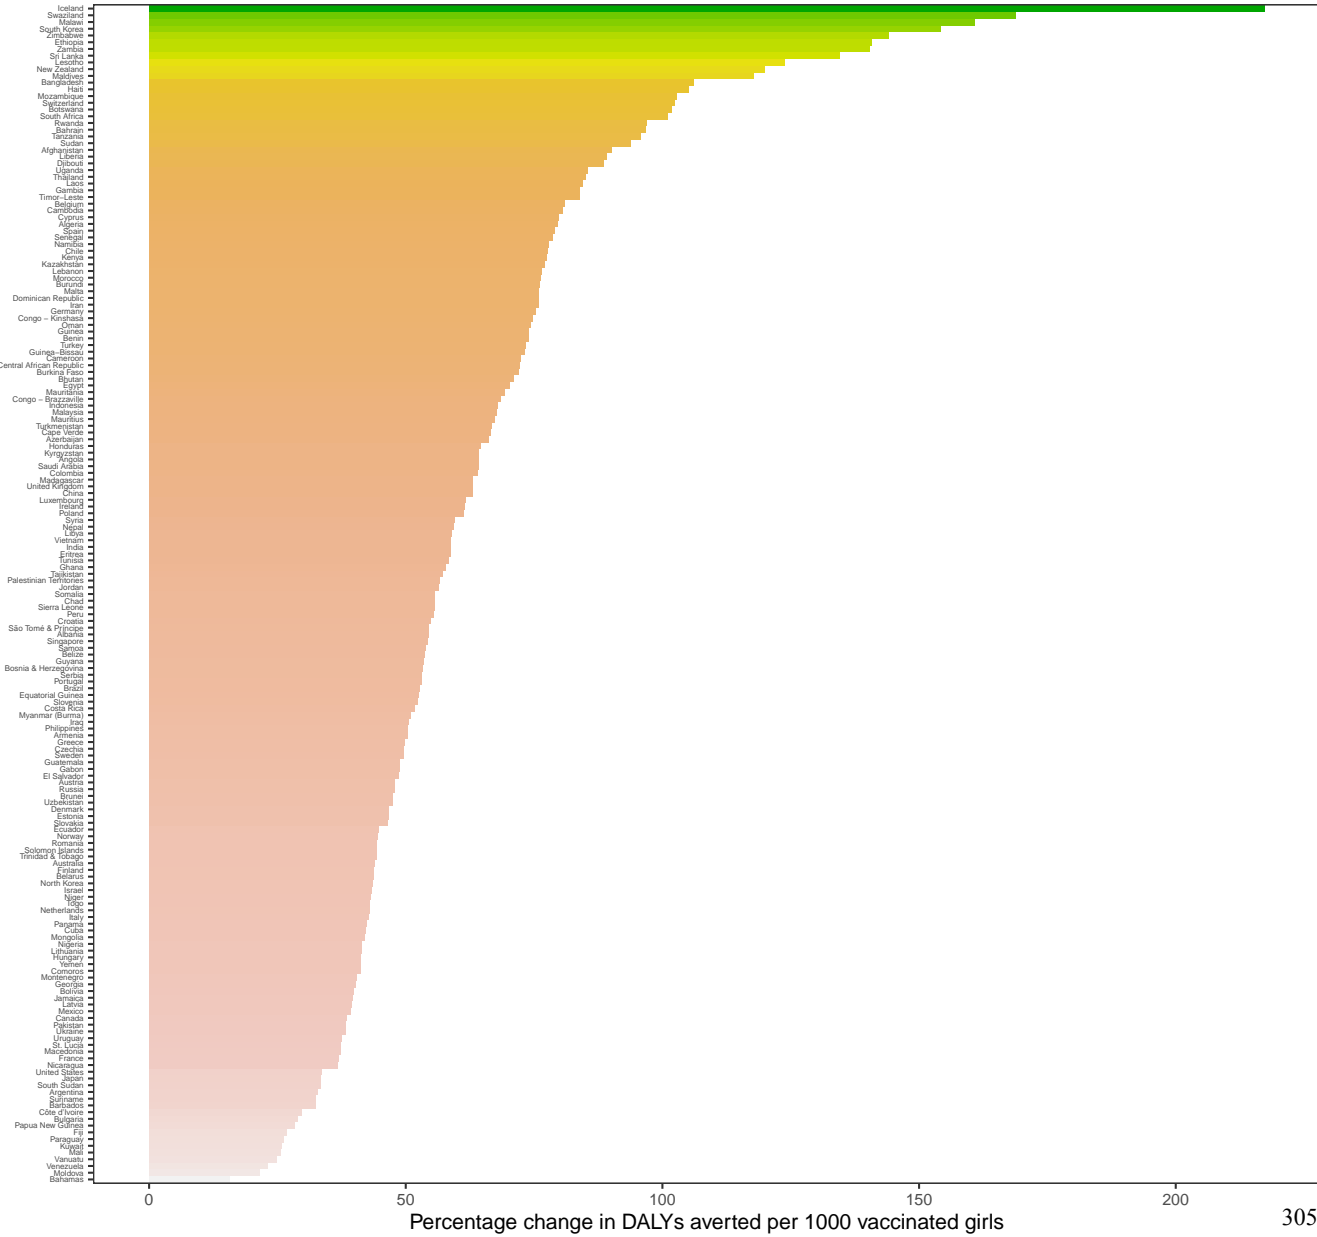







# Percentage change in YLDs averted per 1000 vaccinated girls (vaccination age = 12 years / nonavalent vaccine)

Comparison of scenario s3 in comparison to scenario s1

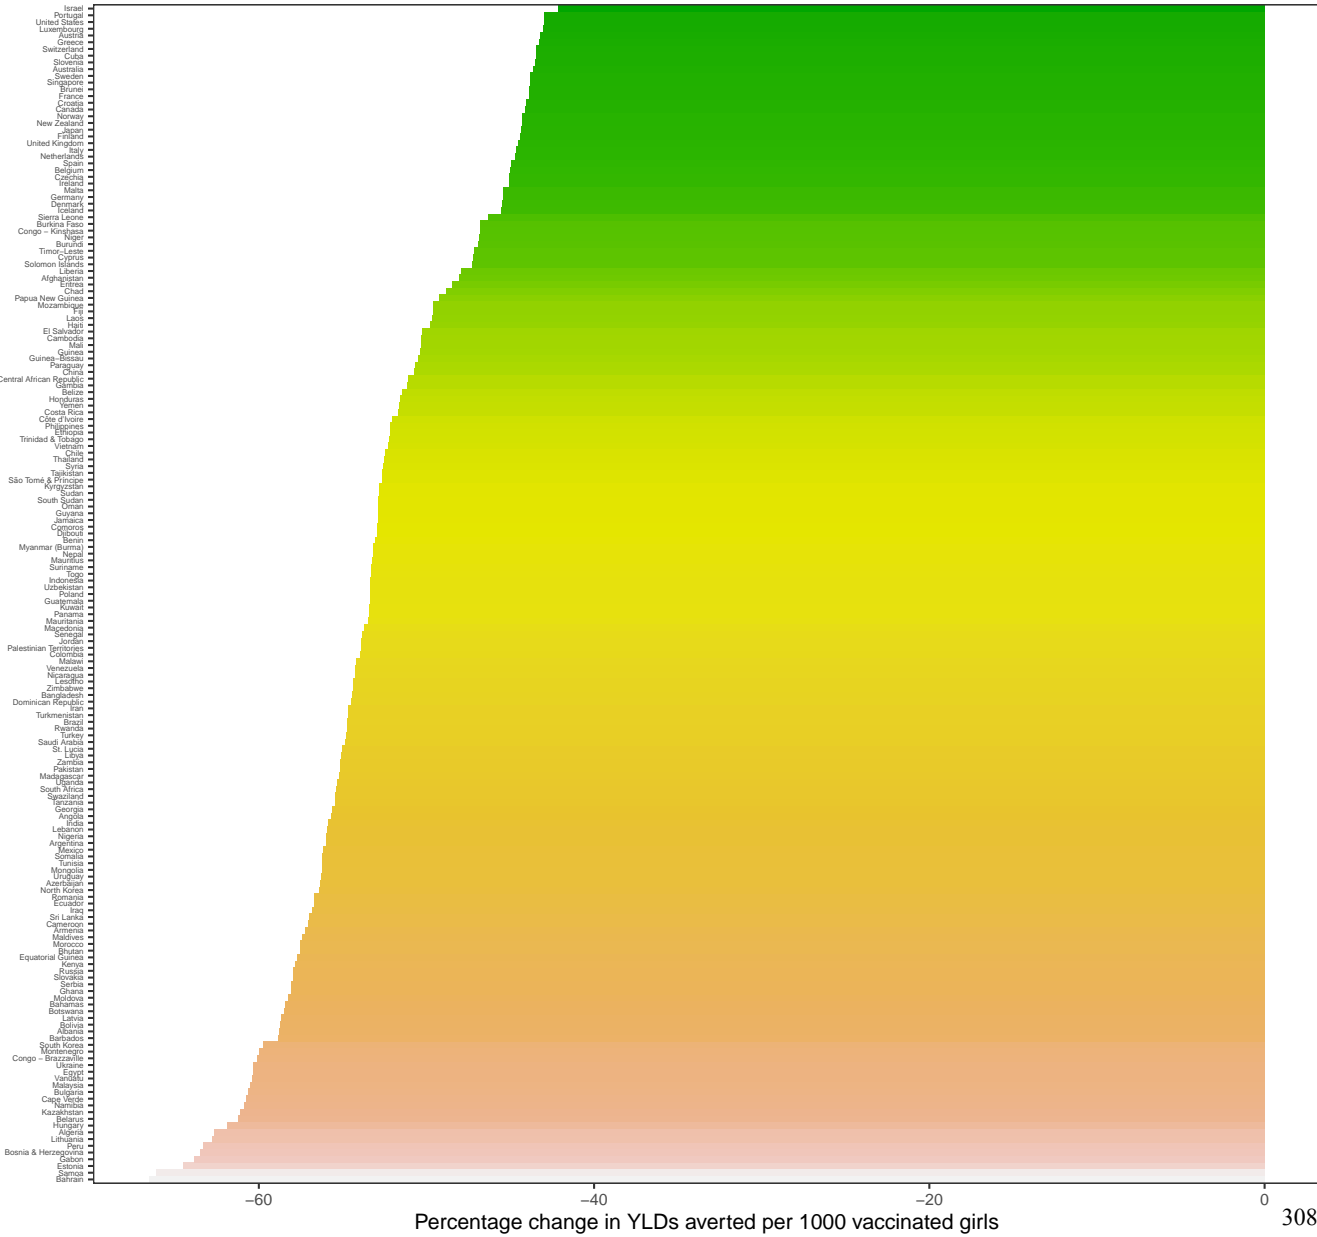



# Percentage change in DALYs averted per 1000 vaccinated girls (vaccination age = 12 years / nonavalent vaccine)

Comparison of scenario s3 in comparison to scenario s1

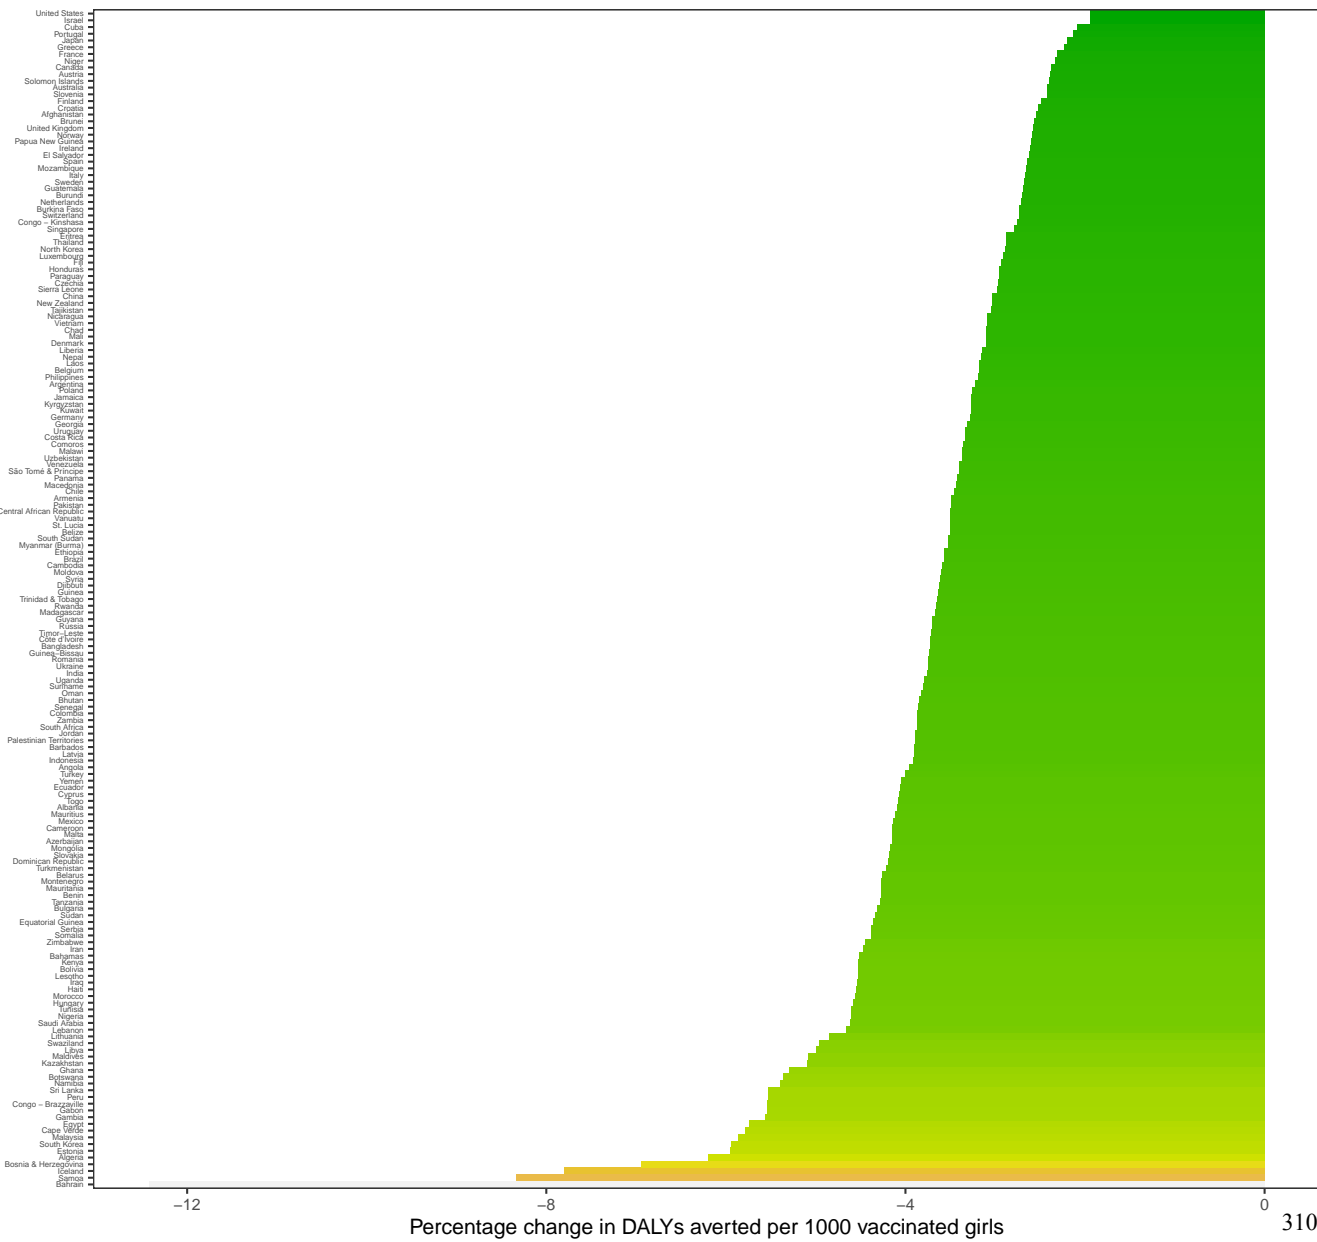

# Percentage change in cases averted per 1000 vaccinated girls (vaccination age = 12 years / nonavalent vaccine)

Comparison of scenario s4 in comparison to scenario s1

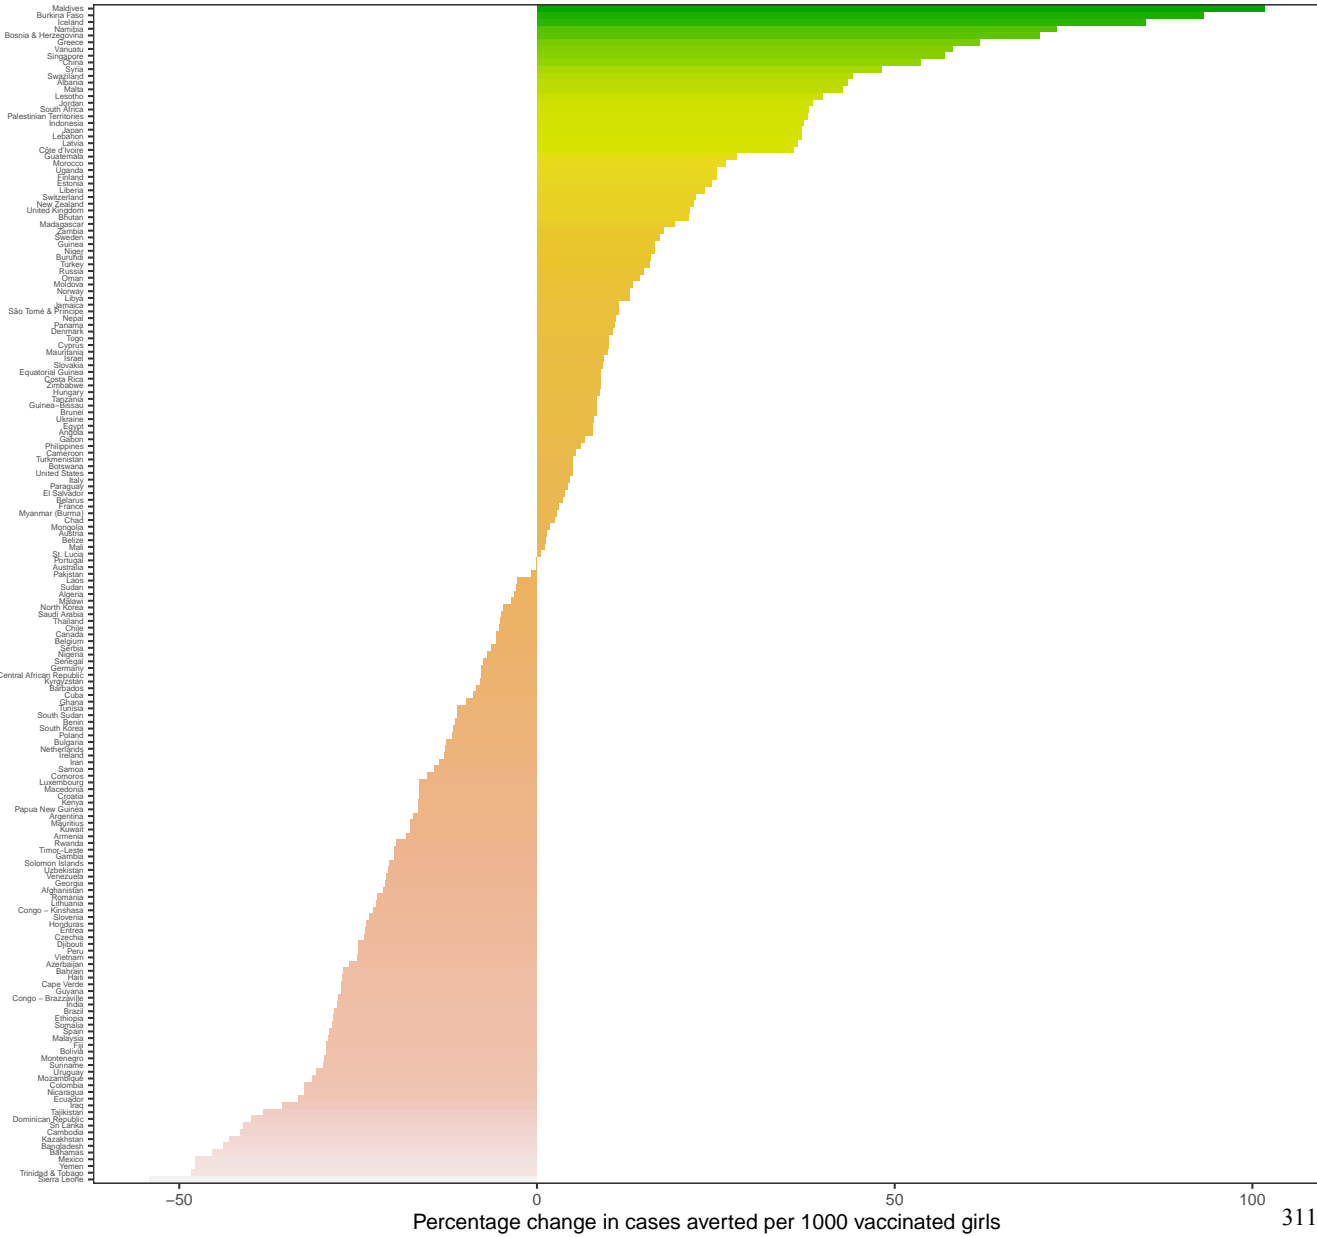

# Percentage change in deaths averted per 1000 vaccinated girls (vaccination age = 12 years / nonavalent vaccine)

Comparison of scenario s4 in comparison to scenario s1



Percentage change in deaths averted per 1000 vaccinated girls

# Percentage change in YLDs averted per 1000 vaccinated girls (vaccination age = 12 years / nonavalent vaccine)

Comparison of scenario s4 in comparison to scenario s1



Percentage change in YLDs averted per 1000 vaccinated girls



# Percentage change in YLLs averted per 1000 vaccinated girls (vaccination age = 12 years / nonavalent vaccine)

Comparison of scenario s4 in comparison to scenario s1

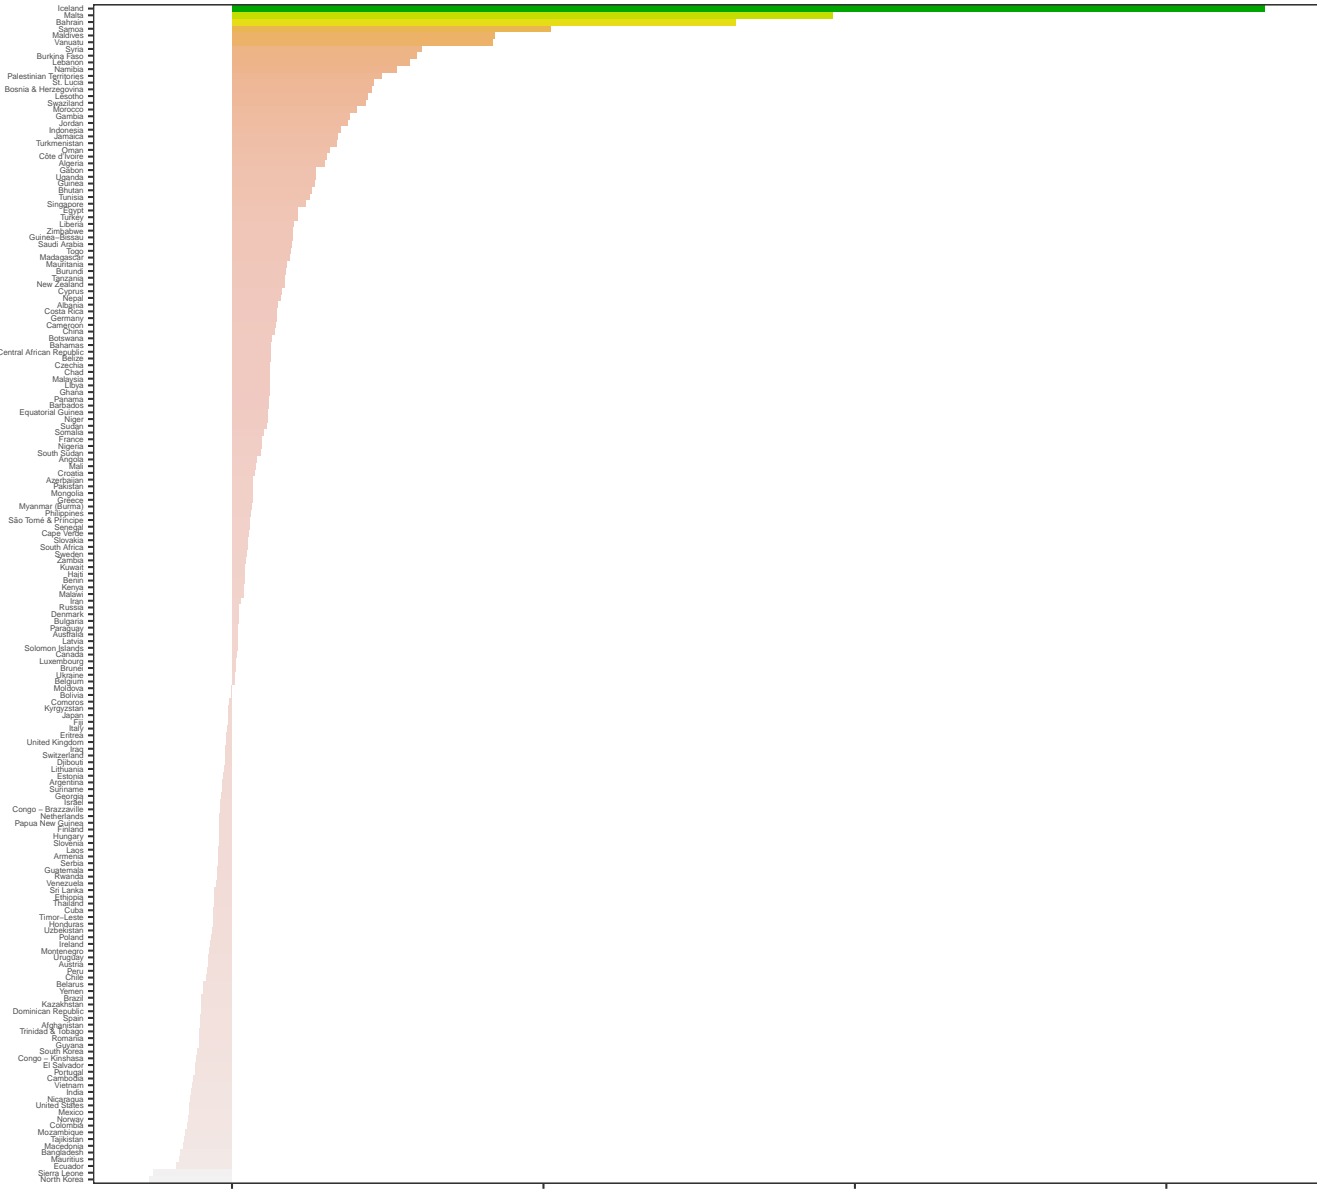

Percentage change in YLLs averted per 1000 vaccinated girls

# Percentage change in DALYs averted per 1000 vaccinated girls (vaccination age = 12 years / nonavalent vaccine)

Comparison of scenario s4 in comparison to scenario s1

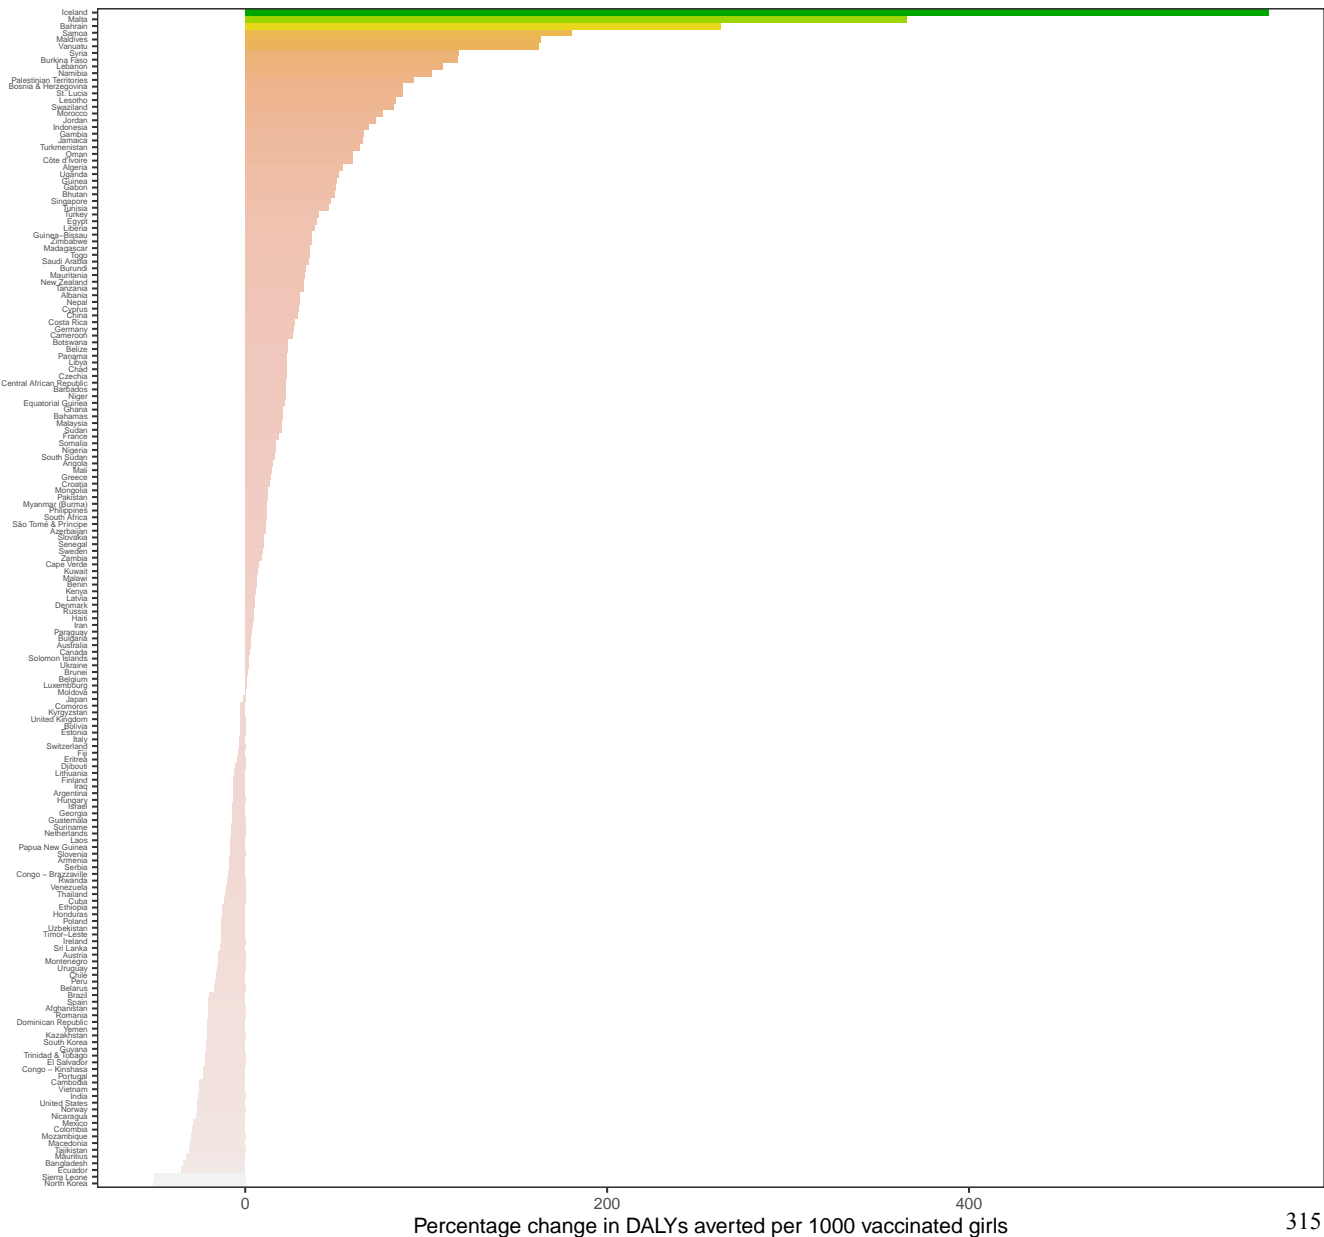

# Percentage change in cases averted per 1000 vaccinated girls (vaccination age = 12 years / nonavalent vaccine)

Comparison of scenario s5 in comparison to scenario s1

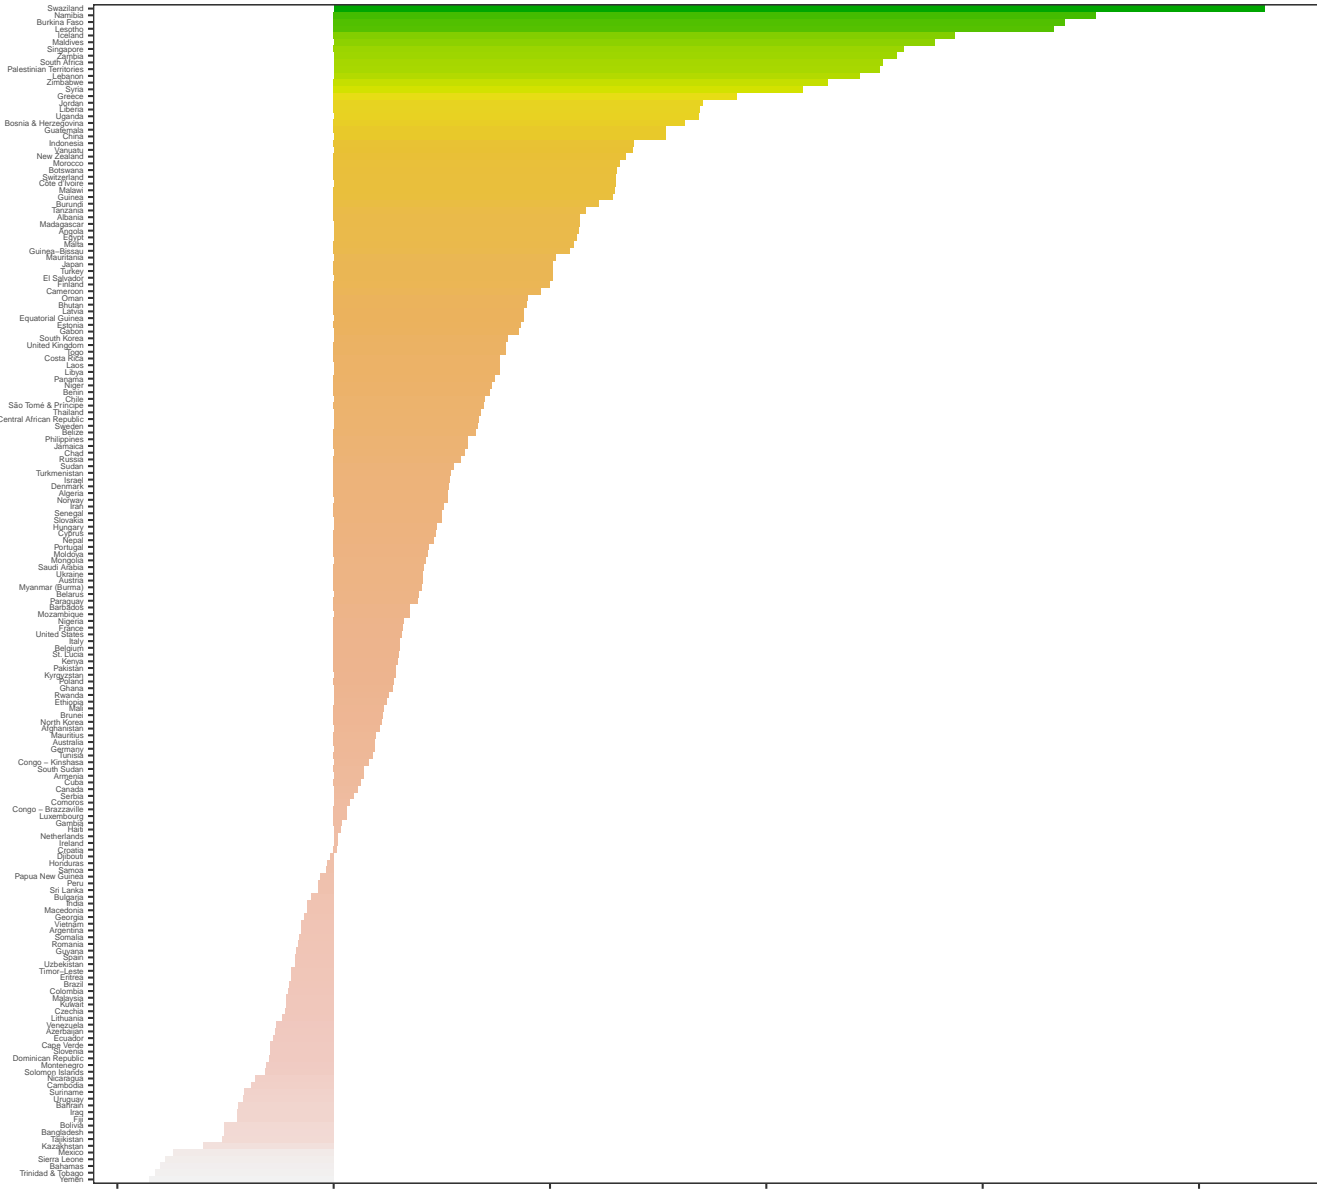

Percentage change in cases averted per 1000 vaccinated girls



# Percentage change in YLDs averted per 1000 vaccinated girls (vaccination age = 12 years / nonavalent vaccine)

Comparison of scenario s5 in comparison to scenario s1

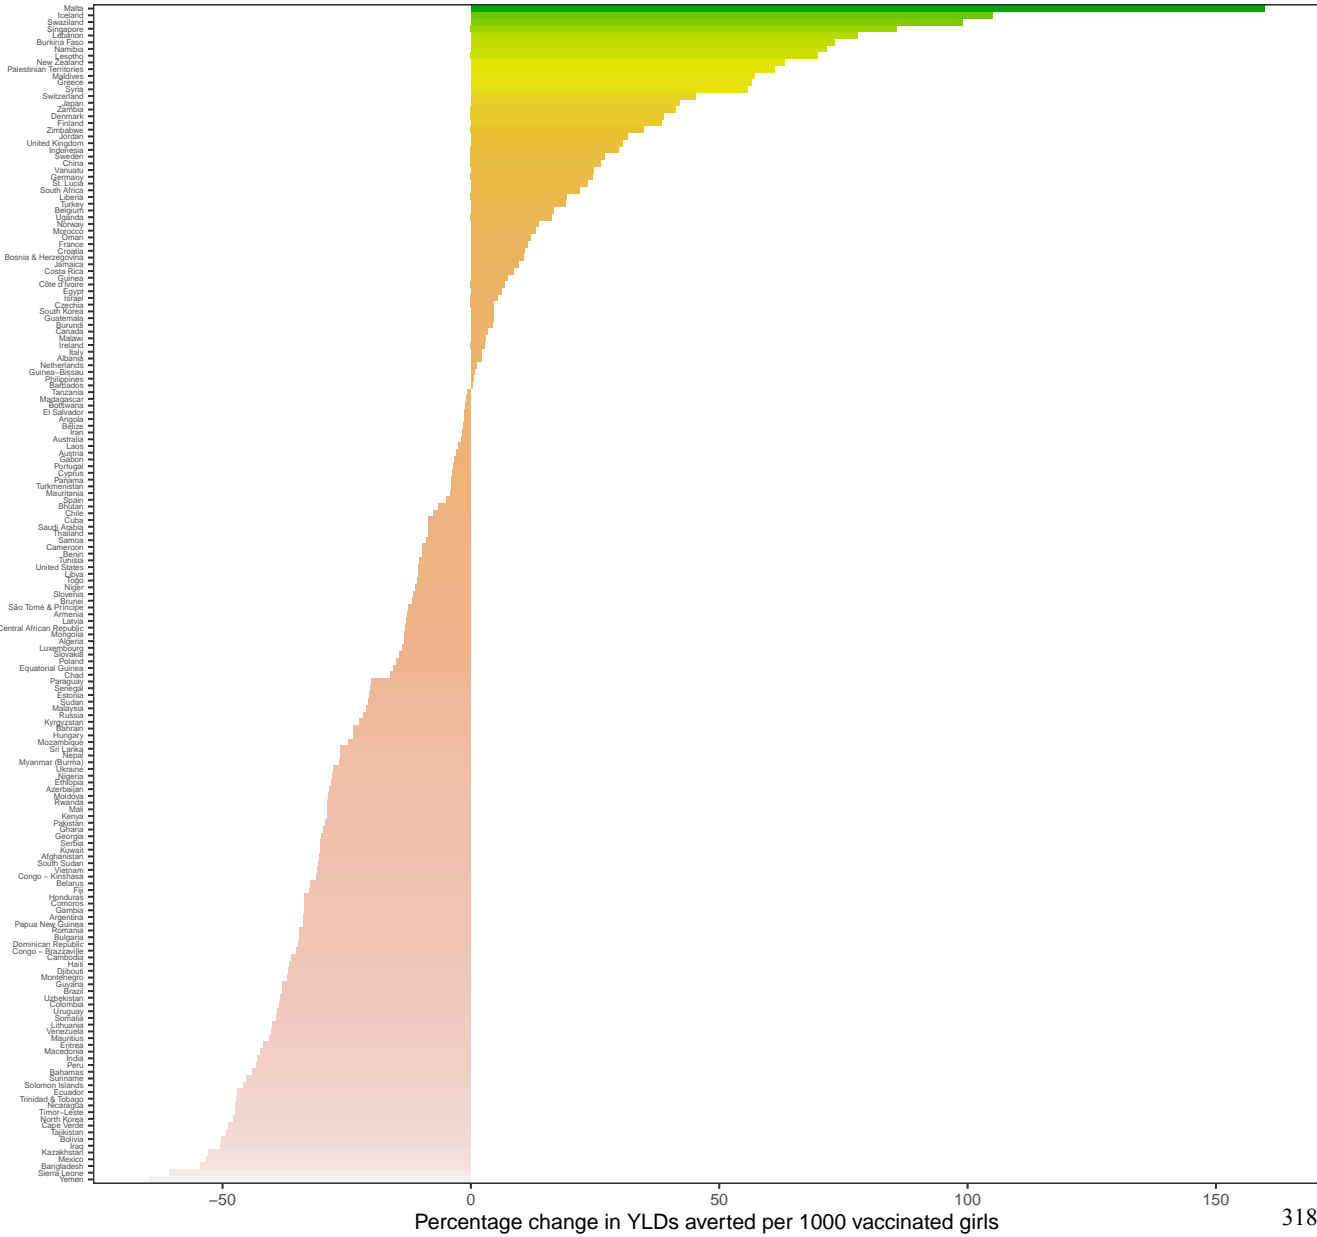

Percentage change in YLDs averted per 1000 vaccinated girls

# Percentage change in YLLs averted per 1000 vaccinated girls (vaccination age = 12 years / nonavalent vaccine)

Comparison of scenario s5 in comparison to scenario s1

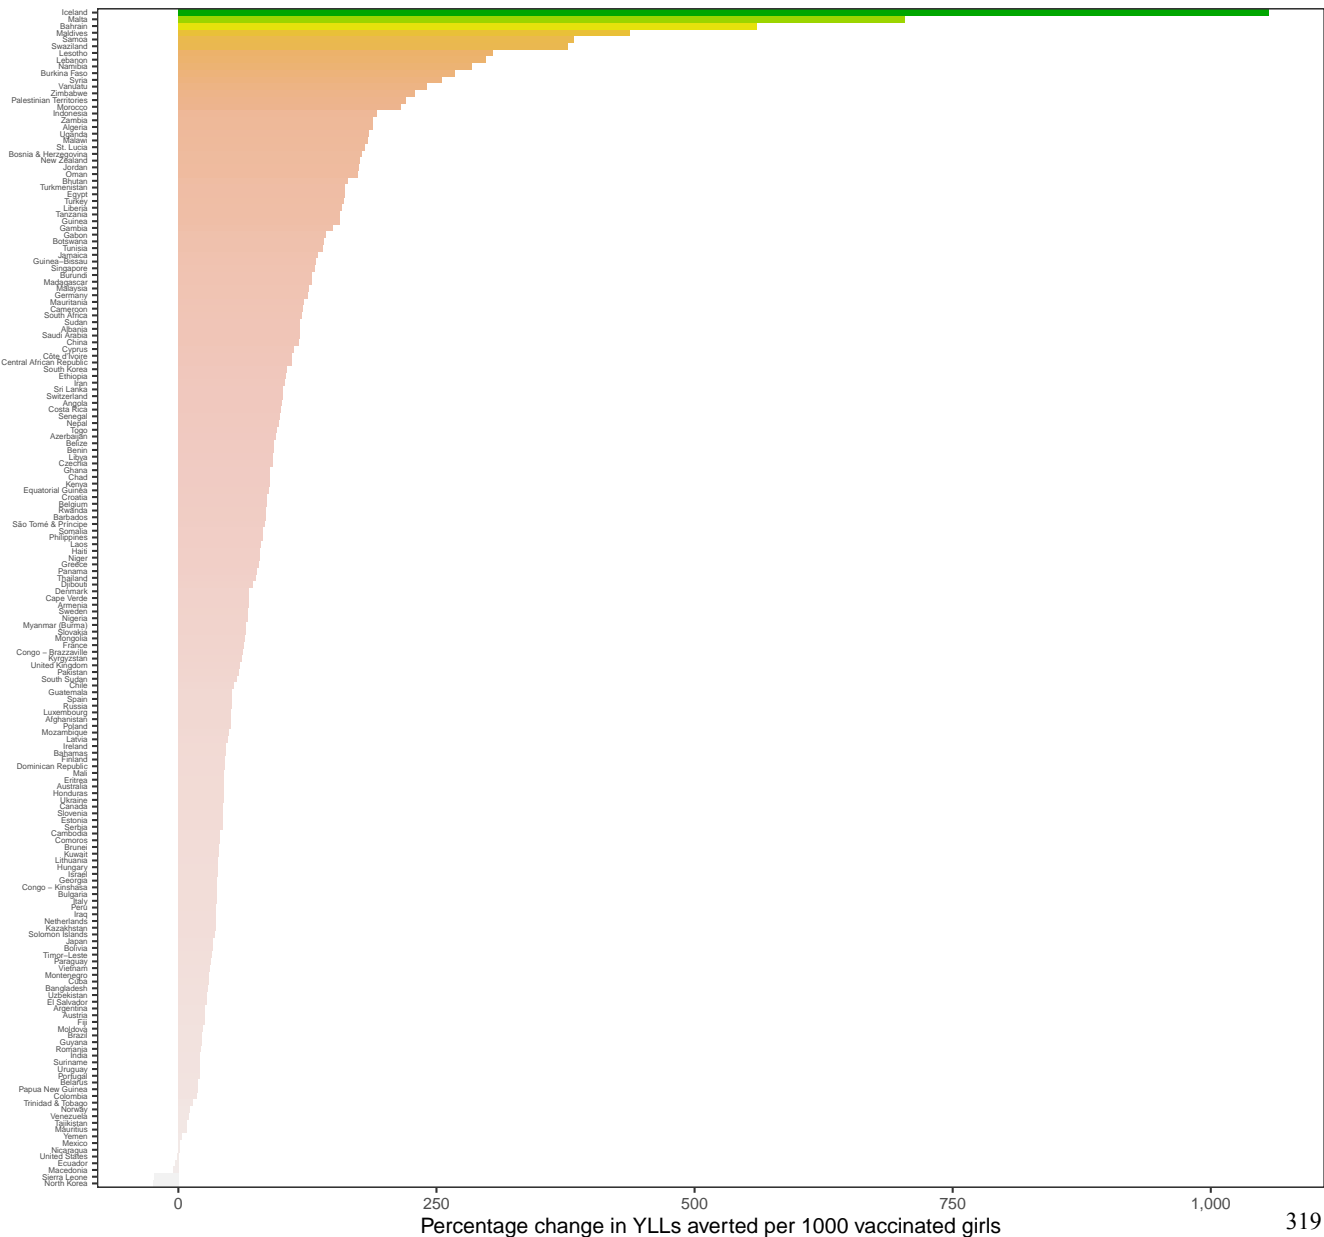

# Percentage change in DALYs averted per 1000 vaccinated girls (vaccination age = 12 years / nonavalent vaccine)

Comparison of scenario s5 in comparison to scenario s1

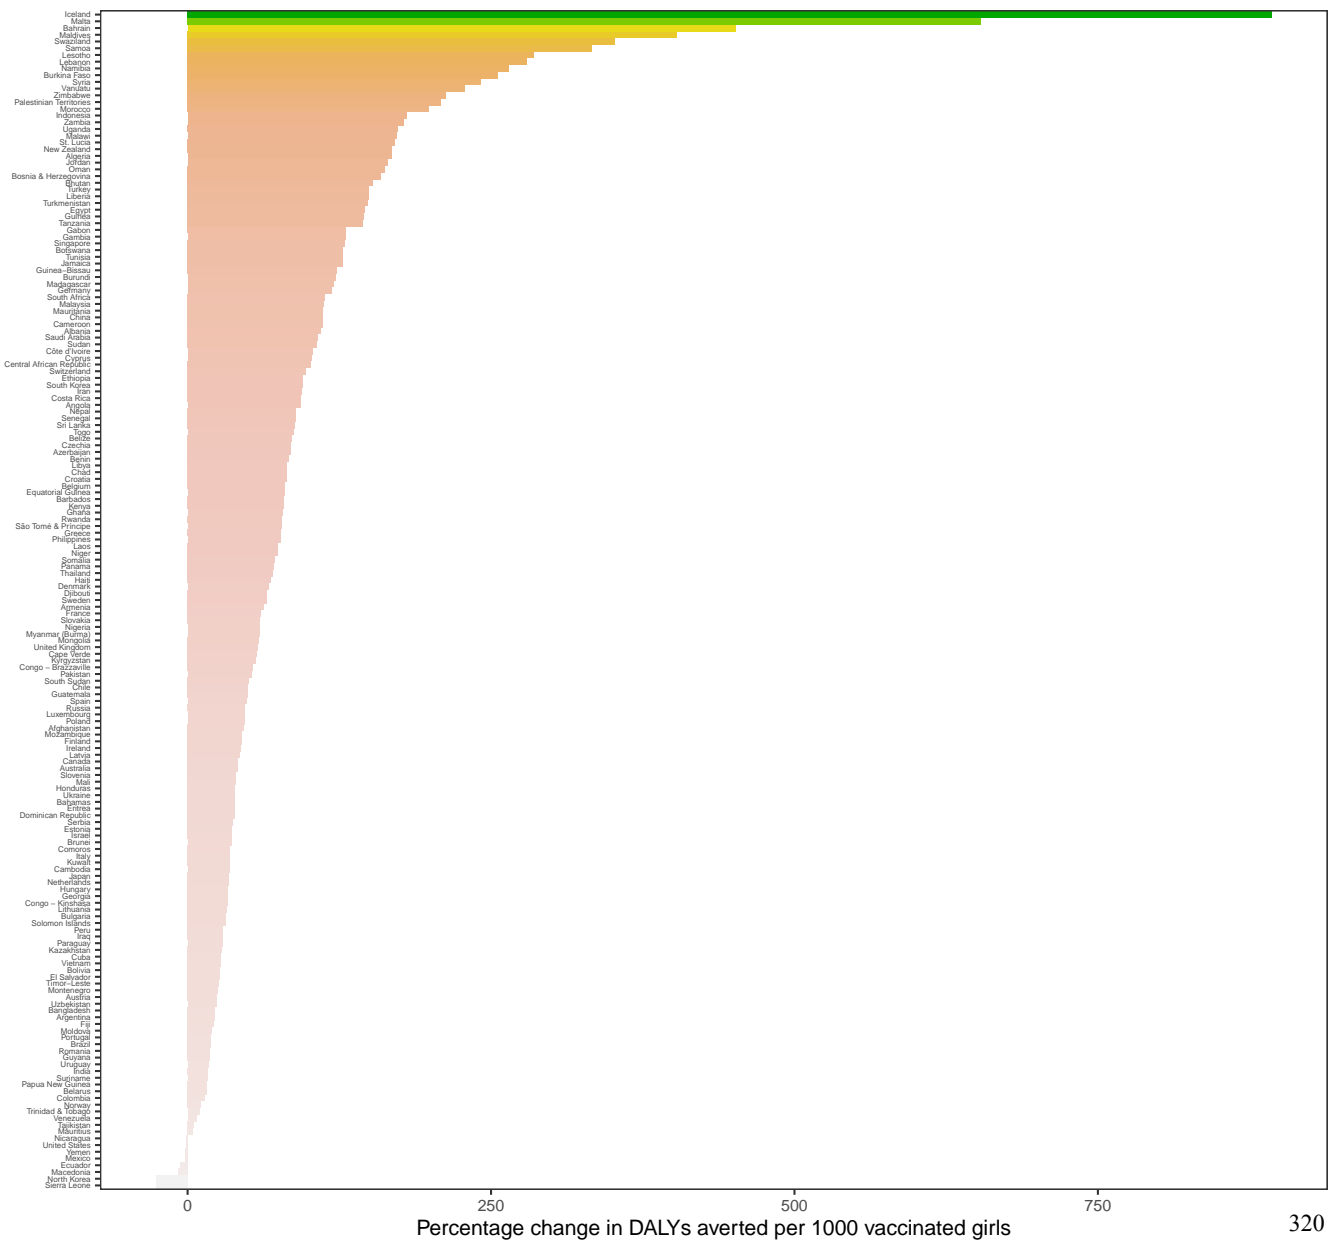

Percentage change in DALYs averted per 1000 vaccinated girls
